# Supplementary material
Source: MDPI journal article supplement (https://www.mdpi.com/2304-6740/6/1/30)
Supplement: s1 [file s1]

Archive with 5 entries (5 files):
- Supporting Information TM180210.pdf
- EindSiHBr2.cif
- EindSiHBr2_checkcif.pdf
- EindSiImiPr2Me2_2_Br_rev.cif
- EindSiImiPr2Me2_2_Br_rev_checkcif.pdf
