# Supplementary material
Source: MDPI journal article supplement (https://www.mdpi.com/2304-6740/6/1/30)
Supplement: s1 [file s1 › EindSiHBr2.cif]

data_global
_audit_creation_date                               2017-11-22
_audit_creation_method                            'by CrystalStructure 4.2.4'
_audit_update_record                               ?

#==============================================================================
# PROCESSING SUMMARY (IUCr Office Use Only)

_journal_date_recd_electronic                      ?
_journal_date_from_coeditor                        ?
_journal_date_accepted                             ?
_journal_coeditor_code                             ?

#==============================================================================
# SUBMISSION DETAILS

_publ_contact_author_name                         'ENTER NAME'
_publ_contact_author_email                        'ENTER EMAIL ADDRESS'
_publ_contact_author_fax                          'ENTER FAX NUMBER'
_publ_contact_author_phone                        'ENTER PHONE NUMBER'
_publ_contact_letter
;
    ENTER TEXT OF LETTER
;
_publ_requested_journal                           'ENTER JOURNAL NAME HERE'
_publ_requested_category
                                               'CHOOSE FI FM FO CI CM CO or AD'
_publ_requested_coeditor_name                      ?

#==============================================================================
# TITLE AND AUTHOR LIST

_publ_section_title
;
    ENTER SECTION TITLE
;
_publ_section_title_footnote
;
    ENTER FOOTNOTE TO TITLE OF PAPER
;
loop_
_publ_author_name
_publ_author_footnote
_publ_author_address
' FIRST AUTHORS NAME '
;
  FIRST AUTHORS FOOTNOTES
;
;
  FIRST AUTHORS ADDRESS
;
_publ_section_synopsis
;
    ENTER SYNOPSIS
;

#==============================================================================
# TEXT

_publ_section_abstract
;
    ENTER ABSTRACT
;
_publ_section_comment
;
    ENTER TEXT
;
_publ_section_references
;
    ENTER OTHER REFERENCES

    Rigaku (2016). CrystalStructure. Version 4.2.4. 
    Rigaku Corporation, Tokyo, Japan.

    Sheldrick, G. M. (2014). Acta Cryst. (2014). A70, C1437.
    SHELXT Version 2014/5

    Sheldrick, G.M. (2008) SHELXL Version 2017/1, Acta Cryst. A64, 112-122.

    Rigaku (1998). REQAB. 
    Rigaku Corporation, Tokyo, Japan.

;
_publ_section_figure_captions
;
    ENTER FIGURE CAPTIONS
;
_publ_section_exptl_prep
;
    ENTER COMPOUND PREPARATION DETAILS
;
_publ_section_exptl_refinement
;
    ENTER SPECIAL DETAILS OF THE REFINEMENT
;

#==============================================================================
data_EindSiHBr2

#==============================================================================
# CHEMICAL DATA

_chemical_formula_sum                             'C28 H46 Br2 Si'
_chemical_formula_moiety                          'C28 H46 Br2 Si'
_chemical_formula_weight                           570.56
_chemical_melting_point                            ?

#==============================================================================
# CRYSTAL DATA
_space_group_crystal_system                        triclinic
_space_group_name_H-M_alt                         'P -1'
_space_group_name_Hall                            '-P 1'
_space_group_IT_number                             2
loop_
_space_group_symop_id
_space_group_symop_operation_xyz
1   '+X,+Y,+Z'
2   '-X,-Y,-Z'
#------------------------------------------------------------------------------
_cell_length_a                                     7.972(3)
_cell_length_b                                     11.070(4)
_cell_length_c                                     16.621(5)
_cell_angle_alpha                                  89.972(4)
_cell_angle_beta                                   80.770(3)
_cell_angle_gamma                                  73.314(5)
_cell_volume                                       1385.1(8)
_cell_formula_units_Z                              2
_cell_measurement_reflns_used                      3994
_cell_measurement_theta_min                        3.07
_cell_measurement_theta_max                        25.02
_cell_measurement_temperature                      100
#------------------------------------------------------------------------------
_exptl_crystal_description                         block
_exptl_crystal_colour                              colorless
_exptl_crystal_size_max                            0.407
_exptl_crystal_size_mid                            0.166
_exptl_crystal_size_min                            0.160
_exptl_crystal_density_diffrn                      1.368
_exptl_crystal_density_meas                        ?
_exptl_crystal_density_method                     'not measured'
_exptl_crystal_F_000                               596.00
_exptl_absorpt_coefficient_mu                      2.992
_exptl_absorpt_correction_type                     multi-scan
_exptl_absorpt_process_details                    'REQAB (Rigaku, 1998)'
_exptl_absorpt_correction_T_min                    0.494
_exptl_absorpt_correction_T_max                    0.620

#==============================================================================
# EXPERIMENTAL DATA

_diffrn_ambient_temperature                        100
_diffrn_radiation_type                            'Mo K\a'
_diffrn_radiation_wavelength                       0.71073
_diffrn_measurement_device_type                   'Rigaku Saturn724'
_diffrn_measurement_method                         \w
_diffrn_detector_area_resol_mean                   7.111
_diffrn_reflns_number                              22599
_diffrn_reflns_av_R_equivalents                    0.0645
_diffrn_reflns_theta_max                           27.499
_diffrn_reflns_theta_min                           3.069
_diffrn_reflns_theta_full                          25.242
_diffrn_measured_fraction_theta_max                0.995
_diffrn_measured_fraction_theta_full               0.995
_diffrn_reflns_Laue_measured_fraction_max          0.995
_diffrn_reflns_Laue_measured_fraction_full         0.995
_diffrn_reflns_point_group_measured_fraction_max   0.995
_diffrn_reflns_point_group_measured_fraction_full  0.995
_diffrn_reflns_limit_h_min                        -10
_diffrn_reflns_limit_h_max                         10
_diffrn_reflns_limit_k_min                        -14
_diffrn_reflns_limit_k_max                         14
_diffrn_reflns_limit_l_min                        -21
_diffrn_reflns_limit_l_max                         21
_diffrn_standards_number                           0
_diffrn_standards_interval_count                   .
_diffrn_standards_decay_%                          ?
_reflns_number_total                               6332
_reflns_number_gt                                  5390
_reflns_threshold_expression                       F^2^>2.0\s(F^2^)
_reflns_Friedel_coverage          0.000
_reflns_Friedel_fraction_max      .
_reflns_Friedel_fraction_full     .

#==============================================================================
# REFINEMENT DATA

_refine_special_details
;
    Refinement was performed using all reflections. The weighted 
    R-factor (wR) and goodness of fit (S) are based on F^2^.
    R-factor (gt) are based on F. The threshold expression of
    F^2^ > 2.0 sigma(F^2^) is used only for calculating R-factor (gt).
;
_refine_ls_structure_factor_coef                   Fsqd
_refine_ls_R_factor_all                            0.0350
_refine_ls_R_factor_gt                             0.0298
_refine_ls_wR_factor_ref                           0.0803
_refine_ls_wR_factor_gt                            0.0777
_refine_ls_number_restraints                       0
_refine_ls_hydrogen_treatment                      mixed
_refine_ls_number_reflns                           6332
_refine_ls_number_parameters                       292
_refine_ls_goodness_of_fit_ref                     1.016
_refine_ls_weighting_scheme                        calc
_refine_ls_weighting_details
                   'w = 1/[\s^2^(Fo^2^)+(0.0461P)^2^] where P=(Fo^2^+2Fc^2^)/3'
_atom_sites_solution_hydrogens                     geom
_atom_sites_solution_primary                       direct
_atom_sites_solution_secondary                     difmap
_refine_ls_shift/su_max                            0.002
_refine_diff_density_max                           0.69
_refine_diff_density_min                          -0.44
_refine_ls_extinction_method                       none
_refine_ls_extinction_coef                         ?

loop_
_atom_type_symbol
_atom_type_description
_atom_type_scat_dispersion_real
_atom_type_scat_dispersion_imag
_atom_type_scat_source
  'C' 'C'  0.0033 0.0016 
;
International Tables for Crystallography
(Vol. C, Tables 4.2.6.8 and 6.1.1.4)
;
  'H' 'H'  0.0000 0.0000 
;
International Tables for Crystallography
(Vol. C, Table 6.1.1.4)
;
  'Br' 'Br'  -0.2901 2.4595 
;
International Tables for Crystallography
(Vol. C, Tables 4.2.6.8 and 6.1.1.4)
;
  'Si' 'Si'  0.0817 0.0704 
;
International Tables for Crystallography
(Vol. C, Tables 4.2.6.8 and 6.1.1.4)
;

#==============================================================================
# ATOMIC COORDINATES AND THERMAL PARAMETERS

loop_
 _atom_site_label
 _atom_site_type_symbol
 _atom_site_fract_x
 _atom_site_fract_y
 _atom_site_fract_z
 _atom_site_U_iso_or_equiv
 _atom_site_adp_type
 _atom_site_occupancy
 _atom_site_site_symmetry_order  
 _atom_site_calc_flag
 _atom_site_refinement_flags_posn
 _atom_site_refinement_flags_adp
 _atom_site_refinement_flags_occupancy
 _atom_site_disorder_assembly
 _atom_site_disorder_group
Br1 Br 0.17048(3) 1.11428(2) 0.85782(2) 0.02553(7) Uani 1 1 d . . . . .
Br2 Br -0.22145(3) 1.01540(2) 0.88634(2) 0.02533(7) Uani 1 1 d . . . . .
Si1 Si 0.07344(7) 0.94476(5) 0.86798(3) 0.01649(12) Uani 1 1 d . . . . .
C1 C 0.1909(2) 0.81829(15) 0.78647(10) 0.0126(3) Uani 1 1 d . . . . .
C2 C 0.3257(2) 0.71336(16) 0.80863(10) 0.0136(3) Uani 1 1 d . . . . .
C3 C 0.3913(2) 0.68287(16) 0.89179(10) 0.0151(4) Uani 1 1 d . . . . .
C4 C 0.5231(3) 0.54777(17) 0.87245(11) 0.0184(4) Uani 1 1 d . . . . .
H4A H 0.629599 0.540065 0.897867 0.022 Uiso 1 1 calc R U . . .
H4B H 0.465649 0.484224 0.895538 0.022 Uiso 1 1 calc R U . . .
C5 C 0.5781(2) 0.52311(17) 0.77994(11) 0.0171(4) Uani 1 1 d . . . . .
C6 C 0.4290(2) 0.62017(16) 0.74934(11) 0.0142(4) Uani 1 1 d . . . . .
C7 C 0.4009(2) 0.62406(16) 0.66920(11) 0.0159(4) Uani 1 1 d . . . . .
H7 H 0.472217 0.560061 0.629854 0.019 Uiso 1 1 calc R U . . .
C8 C 0.2673(2) 0.72271(16) 0.64733(10) 0.0136(3) Uani 1 1 d . . . . .
C9 C 0.2183(2) 0.73601(16) 0.56219(10) 0.0154(4) Uani 1 1 d . . . . .
C10 C 0.0855(3) 0.86998(17) 0.56985(10) 0.0173(4) Uani 1 1 d . . . . .
H10A H -0.016608 0.870439 0.542763 0.021 Uiso 1 1 calc R U . . .
H10B H 0.144141 0.930593 0.543060 0.021 Uiso 1 1 calc R U . . .
C11 C 0.0199(2) 0.90904(16) 0.66210(10) 0.0146(4) Uani 1 1 d . . . . .
C12 C 0.1639(2) 0.81945(16) 0.70327(10) 0.0127(3) Uani 1 1 d . . . . .
C13 C 0.4897(2) 0.77811(18) 0.91274(11) 0.0180(4) Uani 1 1 d . . . . .
H13A H 0.580344 0.780794 0.865025 0.022 Uiso 1 1 calc R U . . .
H13B H 0.403133 0.863213 0.921719 0.022 Uiso 1 1 calc R U . . .
C14 C 0.5814(3) 0.7489(2) 0.98790(12) 0.0237(4) Uani 1 1 d . . . . .
H14A H 0.494007 0.743258 1.035380 0.028 Uiso 1 1 calc R U . . .
H14B H 0.633326 0.816310 0.998427 0.028 Uiso 1 1 calc R U . . .
H14C H 0.675393 0.668327 0.977870 0.028 Uiso 1 1 calc R U . . .
C15 C 0.2505(2) 0.67356(18) 0.96597(11) 0.0184(4) Uani 1 1 d . . . . .
H15A H 0.311456 0.615935 1.004737 0.022 Uiso 1 1 calc R U . . .
H15B H 0.199186 0.758034 0.994117 0.022 Uiso 1 1 calc R U . . .
C16 C 0.0995(3) 0.6272(2) 0.94582(13) 0.0259(4) Uani 1 1 d . . . . .
H16A H 0.027296 0.689604 0.913811 0.031 Uiso 1 1 calc R U . . .
H16B H 0.025273 0.615590 0.996530 0.031 Uiso 1 1 calc R U . . .
H16C H 0.148383 0.546629 0.914132 0.031 Uiso 1 1 calc R U . . .
C17 C 0.7522(2) 0.55594(19) 0.74777(12) 0.0229(4) Uani 1 1 d . . . . .
H17A H 0.768320 0.554358 0.687429 0.027 Uiso 1 1 calc R U . . .
H17B H 0.738115 0.643455 0.767069 0.027 Uiso 1 1 calc R U . . .
C18 C 0.9215(3) 0.4699(2) 0.77259(15) 0.0375(6) Uani 1 1 d . . . . .
H18A H 0.948156 0.385525 0.746694 0.045 Uiso 1 1 calc R U . . .
H18B H 0.904307 0.464268 0.832035 0.045 Uiso 1 1 calc R U . . .
H18C H 1.020602 0.504861 0.754934 0.045 Uiso 1 1 calc R U . . .
C19 C 0.5965(3) 0.38605(17) 0.75311(12) 0.0228(4) Uani 1 1 d . . . . .
H19A H 0.649494 0.372781 0.694538 0.027 Uiso 1 1 calc R U . . .
H19B H 0.681292 0.328812 0.783673 0.027 Uiso 1 1 calc R U . . .
C20 C 0.4256(3) 0.34705(19) 0.76498(14) 0.0297(5) Uani 1 1 d . . . . .
H20A H 0.341996 0.400007 0.732957 0.036 Uiso 1 1 calc R U . . .
H20B H 0.372395 0.357788 0.822875 0.036 Uiso 1 1 calc R U . . .
H20C H 0.452847 0.258342 0.746712 0.036 Uiso 1 1 calc R U . . .
C21 C 0.3808(3) 0.72364(19) 0.49475(11) 0.0212(4) Uani 1 1 d . . . . .
H21A H 0.449260 0.633273 0.486475 0.025 Uiso 1 1 calc R U . . .
H21B H 0.337169 0.750791 0.443217 0.025 Uiso 1 1 calc R U . . .
C22 C 0.5067(3) 0.7981(2) 0.51029(13) 0.0300(5) Uani 1 1 d . . . . .
H22A H 0.560320 0.766744 0.558181 0.036 Uiso 1 1 calc R U . . .
H22B H 0.440565 0.887654 0.520160 0.036 Uiso 1 1 calc R U . . .
H22C H 0.600258 0.787783 0.462564 0.036 Uiso 1 1 calc R U . . .
C23 C 0.1322(3) 0.63192(17) 0.54534(11) 0.0185(4) Uani 1 1 d . . . . .
H23A H 0.223026 0.548827 0.542769 0.022 Uiso 1 1 calc R U . . .
H23B H 0.036987 0.632967 0.591846 0.022 Uiso 1 1 calc R U . . .
C24 C 0.0530(3) 0.6448(2) 0.46661(12) 0.0289(5) Uani 1 1 d . . . . .
H24A H 0.145044 0.646609 0.420190 0.035 Uiso 1 1 calc R U . . .
H24B H -0.044583 0.723324 0.470379 0.035 Uiso 1 1 calc R U . . .
H24C H 0.007936 0.572841 0.458850 0.035 Uiso 1 1 calc R U . . .
C25 C -0.0006(3) 1.05132(16) 0.67593(11) 0.0181(4) Uani 1 1 d . . . . .
H25A H -0.090271 1.100173 0.644196 0.022 Uiso 1 1 calc R U . . .
H25B H -0.047209 1.075457 0.734368 0.022 Uiso 1 1 calc R U . . .
C26 C 0.1688(3) 1.08936(18) 0.65235(12) 0.0227(4) Uani 1 1 d . . . . .
H26A H 0.146627 1.178158 0.669182 0.027 Uiso 1 1 calc R U . . .
H26B H 0.206779 1.077968 0.593085 0.027 Uiso 1 1 calc R U . . .
H26C H 0.262284 1.036454 0.679596 0.027 Uiso 1 1 calc R U . . .
C27 C -0.1555(2) 0.87571(18) 0.69026(11) 0.0190(4) Uani 1 1 d . . . . .
H27A H -0.141630 0.790217 0.667302 0.023 Uiso 1 1 calc R U . . .
H27B H -0.173023 0.871622 0.750423 0.023 Uiso 1 1 calc R U . . .
C28 C -0.3234(3) 0.9654(2) 0.66713(15) 0.0329(5) Uani 1 1 d . . . . .
H28A H -0.349354 1.047620 0.695871 0.039 Uiso 1 1 calc R U . . .
H28B H -0.423238 0.930390 0.682546 0.039 Uiso 1 1 calc R U . . .
H28C H -0.305533 0.975752 0.608101 0.039 Uiso 1 1 calc R U . . .
H1 H 0.098(3) 0.9099(18) 0.9433(12) 0.017(5) Uiso 1 1 d . . . . .

loop_
 _atom_site_aniso_label
 _atom_site_aniso_U_11
 _atom_site_aniso_U_22
 _atom_site_aniso_U_33
 _atom_site_aniso_U_23
 _atom_site_aniso_U_13
 _atom_site_aniso_U_12
Br1 0.03433(13) 0.01947(11) 0.02717(11) -0.00001(8) -0.01146(9) -0.01130(9)
Br2 0.02045(11) 0.02836(12) 0.02370(11) -0.00422(8) -0.00106(8) -0.00301(8)
Si1 0.0199(3) 0.0149(2) 0.0139(2) 0.00017(18) -0.0047(2) -0.0027(2)
C1 0.0134(8) 0.0105(8) 0.0138(8) 0.0019(6) -0.0031(7) -0.0032(6)
C2 0.0152(9) 0.0133(8) 0.0146(8) 0.0044(6) -0.0064(7) -0.0056(7)
C3 0.0173(9) 0.0162(9) 0.0139(8) 0.0063(7) -0.0078(7) -0.0053(7)
C4 0.0193(9) 0.0167(9) 0.0195(9) 0.0077(7) -0.0092(7) -0.0027(7)
C5 0.0153(9) 0.0160(9) 0.0194(9) 0.0048(7) -0.0074(7) -0.0016(7)
C6 0.0145(9) 0.0132(8) 0.0162(8) 0.0053(7) -0.0057(7) -0.0044(7)
C7 0.0181(9) 0.0141(8) 0.0155(8) 0.0000(7) -0.0043(7) -0.0038(7)
C8 0.0153(9) 0.0151(8) 0.0124(8) 0.0034(6) -0.0039(7) -0.0064(7)
C9 0.0188(9) 0.0161(9) 0.0126(8) 0.0028(7) -0.0058(7) -0.0054(7)
C10 0.0220(10) 0.0158(9) 0.0149(8) 0.0045(7) -0.0082(7) -0.0043(7)
C11 0.0161(9) 0.0128(8) 0.0147(8) 0.0026(7) -0.0069(7) -0.0018(7)
C12 0.0138(8) 0.0115(8) 0.0149(8) 0.0038(6) -0.0047(7) -0.0058(7)
C13 0.0199(9) 0.0218(9) 0.0157(8) 0.0044(7) -0.0072(7) -0.0093(8)
C14 0.0222(10) 0.0306(11) 0.0214(9) 0.0022(8) -0.0113(8) -0.0086(8)
C15 0.0210(10) 0.0209(9) 0.0153(8) 0.0073(7) -0.0052(7) -0.0079(8)
C16 0.0252(11) 0.0300(11) 0.0269(10) 0.0083(9) -0.0054(9) -0.0146(9)
C17 0.0166(10) 0.0258(10) 0.0252(10) 0.0021(8) -0.0047(8) -0.0038(8)
C18 0.0199(11) 0.0473(14) 0.0434(14) 0.0018(11) -0.0120(10) -0.0031(10)
C19 0.0228(10) 0.0160(9) 0.0280(10) 0.0032(8) -0.0090(8) -0.0003(8)
C20 0.0335(12) 0.0169(10) 0.0404(12) 0.0003(9) -0.0080(10) -0.0088(9)
C21 0.0228(10) 0.0254(10) 0.0153(9) 0.0016(7) -0.0025(8) -0.0076(8)
C22 0.0261(11) 0.0410(13) 0.0262(11) 0.0052(9) -0.0020(9) -0.0159(10)
C23 0.0233(10) 0.0172(9) 0.0170(9) 0.0024(7) -0.0069(7) -0.0074(7)
C24 0.0426(13) 0.0310(11) 0.0224(10) 0.0055(8) -0.0159(9) -0.0196(10)
C25 0.0227(10) 0.0125(8) 0.0196(9) 0.0035(7) -0.0096(8) -0.0024(7)
C26 0.0310(11) 0.0157(9) 0.0244(10) 0.0054(7) -0.0078(8) -0.0096(8)
C27 0.0167(9) 0.0212(9) 0.0204(9) 0.0002(7) -0.0071(7) -0.0053(7)
C28 0.0185(10) 0.0352(12) 0.0449(13) -0.0011(10) -0.0138(10) -0.0034(9)

#==============================================================================
_computing_data_collection
                                             'CrystalClear (Rigaku Inc., 2008)'
_computing_cell_refinement                         CrystalClear
_computing_data_reduction                          CrystalClear
_computing_structure_solution
                                      'SHELXT Version 2014/5 (Sheldrick, 2014)'
_computing_structure_refinement
                                      'SHELXL Version 2017/1 (Sheldrick, 2008)'
_computing_publication_material
                                        'CrystalStructure 4.2.4 (Rigaku, 2016)'
_computing_molecular_graphics                     'CrystalStructure 4.2.4'

#==============================================================================
# MOLECULAR GEOMETRY

_geom_special_details
;
 All esds (except the esd in the dihedral angle between two l.s. planes)
 are estimated using the full covariance matrix.  The cell esds are taken
 into account individually in the estimation of esds in distances, angles
 and torsion angles; correlations between esds in cell parameters are only
 used when they are defined by crystal symmetry.  An approximate (isotropic)
 treatment of cell esds is used for estimating esds involving l.s. planes.
;

loop_
 _geom_bond_atom_site_label_1
 _geom_bond_atom_site_label_2
 _geom_bond_distance
 _geom_bond_site_symmetry_2
 _geom_bond_publ_flag
Br1 Si1 2.2226(8) . ?
Br2 Si1 2.2238(10) . ?
Si1 C1 1.8746(18) . ?
Si1 H1 1.338(19) . ?
C1 C2 1.432(2) . ?
C1 C12 1.433(2) . ?
C2 C6 1.402(2) . ?
C2 C3 1.558(2) . ?
C3 C13 1.553(3) . ?
C3 C15 1.553(3) . ?
C3 C4 1.560(2) . ?
C4 C5 1.532(2) . ?
C4 H4A 0.9900 . ?
C4 H4B 0.9900 . ?
C5 C6 1.512(2) . ?
C5 C19 1.541(3) . ?
C5 C17 1.548(3) . ?
C6 C7 1.384(2) . ?
C7 C8 1.384(2) . ?
C7 H7 0.9500 . ?
C8 C12 1.392(2) . ?
C8 C9 1.523(2) . ?
C9 C21 1.544(3) . ?
C9 C10 1.547(2) . ?
C9 C23 1.547(3) . ?
C10 C11 1.557(2) . ?
C10 H10A 0.9900 . ?
C10 H10B 0.9900 . ?
C11 C12 1.539(2) . ?
C11 C27 1.548(3) . ?
C11 C25 1.549(2) . ?
C13 C14 1.535(2) . ?
C13 H13A 0.9900 . ?
C13 H13B 0.9900 . ?
C14 H14A 0.9800 . ?
C14 H14B 0.9800 . ?
C14 H14C 0.9800 . ?
C15 C16 1.520(3) . ?
C15 H15A 0.9900 . ?
C15 H15B 0.9900 . ?
C16 H16A 0.9800 . ?
C16 H16B 0.9800 . ?
C16 H16C 0.9800 . ?
C17 C18 1.529(3) . ?
C17 H17A 0.9900 . ?
C17 H17B 0.9900 . ?
C18 H18A 0.9800 . ?
C18 H18B 0.9800 . ?
C18 H18C 0.9800 . ?
C19 C20 1.527(3) . ?
C19 H19A 0.9900 . ?
C19 H19B 0.9900 . ?
C20 H20A 0.9800 . ?
C20 H20B 0.9800 . ?
C20 H20C 0.9800 . ?
C21 C22 1.520(3) . ?
C21 H21A 0.9900 . ?
C21 H21B 0.9900 . ?
C22 H22A 0.9800 . ?
C22 H22B 0.9800 . ?
C22 H22C 0.9800 . ?
C23 C24 1.531(2) . ?
C23 H23A 0.9900 . ?
C23 H23B 0.9900 . ?
C24 H24A 0.9800 . ?
C24 H24B 0.9800 . ?
C24 H24C 0.9800 . ?
C25 C26 1.521(3) . ?
C25 H25A 0.9900 . ?
C25 H25B 0.9900 . ?
C26 H26A 0.9800 . ?
C26 H26B 0.9800 . ?
C26 H26C 0.9800 . ?
C27 C28 1.525(3) . ?
C27 H27A 0.9900 . ?
C27 H27B 0.9900 . ?
C28 H28A 0.9800 . ?
C28 H28B 0.9800 . ?
C28 H28C 0.9800 . ?

loop_
 _geom_angle_atom_site_label_1
 _geom_angle_atom_site_label_2
 _geom_angle_atom_site_label_3
 _geom_angle
 _geom_angle_site_symmetry_1
 _geom_angle_site_symmetry_3
 _geom_angle_publ_flag
C1 Si1 Br1 113.71(6) . . ?
C1 Si1 Br2 118.64(6) . . ?
Br1 Si1 Br2 106.38(3) . . ?
C1 Si1 H1 113.7(8) . . ?
Br1 Si1 H1 101.8(8) . . ?
Br2 Si1 H1 100.5(8) . . ?
C2 C1 C12 116.96(15) . . ?
C2 C1 Si1 116.84(12) . . ?
C12 C1 Si1 126.14(13) . . ?
C6 C2 C1 120.09(15) . . ?
C6 C2 C3 109.20(14) . . ?
C1 C2 C3 130.65(15) . . ?
C13 C3 C15 110.12(15) . . ?
C13 C3 C2 109.87(14) . . ?
C15 C3 C2 117.00(15) . . ?
C13 C3 C4 110.94(15) . . ?
C15 C3 C4 106.92(14) . . ?
C2 C3 C4 101.60(13) . . ?
C5 C4 C3 109.86(14) . . ?
C5 C4 H4A 109.7 . . ?
C3 C4 H4A 109.7 . . ?
C5 C4 H4B 109.7 . . ?
C3 C4 H4B 109.7 . . ?
H4A C4 H4B 108.2 . . ?
C6 C5 C4 101.27(14) . . ?
C6 C5 C19 113.85(15) . . ?
C4 C5 C19 112.29(15) . . ?
C6 C5 C17 107.29(15) . . ?
C4 C5 C17 111.99(15) . . ?
C19 C5 C17 109.85(15) . . ?
C7 C6 C2 121.73(16) . . ?
C7 C6 C5 124.22(16) . . ?
C2 C6 C5 113.92(15) . . ?
C8 C7 C6 118.90(16) . . ?
C8 C7 H7 120.5 . . ?
C6 C7 H7 120.5 . . ?
C7 C8 C12 121.71(16) . . ?
C7 C8 C9 124.28(15) . . ?
C12 C8 C9 114.01(15) . . ?
C8 C9 C21 112.67(15) . . ?
C8 C9 C10 101.56(13) . . ?
C21 C9 C10 112.34(15) . . ?
C8 C9 C23 109.04(14) . . ?
C21 C9 C23 108.38(15) . . ?
C10 C9 C23 112.77(15) . . ?
C9 C10 C11 108.54(13) . . ?
C9 C10 H10A 110.0 . . ?
C11 C10 H10A 110.0 . . ?
C9 C10 H10B 110.0 . . ?
C11 C10 H10B 110.0 . . ?
H10A C10 H10B 108.4 . . ?
C12 C11 C27 107.34(14) . . ?
C12 C11 C25 114.86(14) . . ?
C27 C11 C25 112.64(14) . . ?
C12 C11 C10 102.93(13) . . ?
C27 C11 C10 109.07(15) . . ?
C25 C11 C10 109.47(15) . . ?
C8 C12 C1 120.55(15) . . ?
C8 C12 C11 109.17(15) . . ?
C1 C12 C11 130.03(15) . . ?
C14 C13 C3 115.18(15) . . ?
C14 C13 H13A 108.5 . . ?
C3 C13 H13A 108.5 . . ?
C14 C13 H13B 108.5 . . ?
C3 C13 H13B 108.5 . . ?
H13A C13 H13B 107.5 . . ?
C13 C14 H14A 109.5 . . ?
C13 C14 H14B 109.5 . . ?
H14A C14 H14B 109.5 . . ?
C13 C14 H14C 109.5 . . ?
H14A C14 H14C 109.5 . . ?
H14B C14 H14C 109.5 . . ?
C16 C15 C3 115.45(15) . . ?
C16 C15 H15A 108.4 . . ?
C3 C15 H15A 108.4 . . ?
C16 C15 H15B 108.4 . . ?
C3 C15 H15B 108.4 . . ?
H15A C15 H15B 107.5 . . ?
C15 C16 H16A 109.5 . . ?
C15 C16 H16B 109.5 . . ?
H16A C16 H16B 109.5 . . ?
C15 C16 H16C 109.5 . . ?
H16A C16 H16C 109.5 . . ?
H16B C16 H16C 109.5 . . ?
C18 C17 C5 116.19(17) . . ?
C18 C17 H17A 108.2 . . ?
C5 C17 H17A 108.2 . . ?
C18 C17 H17B 108.2 . . ?
C5 C17 H17B 108.2 . . ?
H17A C17 H17B 107.4 . . ?
C17 C18 H18A 109.5 . . ?
C17 C18 H18B 109.5 . . ?
H18A C18 H18B 109.5 . . ?
C17 C18 H18C 109.5 . . ?
H18A C18 H18C 109.5 . . ?
H18B C18 H18C 109.5 . . ?
C20 C19 C5 116.34(16) . . ?
C20 C19 H19A 108.2 . . ?
C5 C19 H19A 108.2 . . ?
C20 C19 H19B 108.2 . . ?
C5 C19 H19B 108.2 . . ?
H19A C19 H19B 107.4 . . ?
C19 C20 H20A 109.5 . . ?
C19 C20 H20B 109.5 . . ?
H20A C20 H20B 109.5 . . ?
C19 C20 H20C 109.5 . . ?
H20A C20 H20C 109.5 . . ?
H20B C20 H20C 109.5 . . ?
C22 C21 C9 116.22(16) . . ?
C22 C21 H21A 108.2 . . ?
C9 C21 H21A 108.2 . . ?
C22 C21 H21B 108.2 . . ?
C9 C21 H21B 108.2 . . ?
H21A C21 H21B 107.4 . . ?
C21 C22 H22A 109.5 . . ?
C21 C22 H22B 109.5 . . ?
H22A C22 H22B 109.5 . . ?
C21 C22 H22C 109.5 . . ?
H22A C22 H22C 109.5 . . ?
H22B C22 H22C 109.5 . . ?
C24 C23 C9 114.67(15) . . ?
C24 C23 H23A 108.6 . . ?
C9 C23 H23A 108.6 . . ?
C24 C23 H23B 108.6 . . ?
C9 C23 H23B 108.6 . . ?
H23A C23 H23B 107.6 . . ?
C23 C24 H24A 109.5 . . ?
C23 C24 H24B 109.5 . . ?
H24A C24 H24B 109.5 . . ?
C23 C24 H24C 109.5 . . ?
H24A C24 H24C 109.5 . . ?
H24B C24 H24C 109.5 . . ?
C26 C25 C11 115.19(15) . . ?
C26 C25 H25A 108.5 . . ?
C11 C25 H25A 108.5 . . ?
C26 C25 H25B 108.5 . . ?
C11 C25 H25B 108.5 . . ?
H25A C25 H25B 107.5 . . ?
C25 C26 H26A 109.5 . . ?
C25 C26 H26B 109.5 . . ?
H26A C26 H26B 109.5 . . ?
C25 C26 H26C 109.5 . . ?
H26A C26 H26C 109.5 . . ?
H26B C26 H26C 109.5 . . ?
C28 C27 C11 116.52(17) . . ?
C28 C27 H27A 108.2 . . ?
C11 C27 H27A 108.2 . . ?
C28 C27 H27B 108.2 . . ?
C11 C27 H27B 108.2 . . ?
H27A C27 H27B 107.3 . . ?
C27 C28 H28A 109.5 . . ?
C27 C28 H28B 109.5 . . ?
H28A C28 H28B 109.5 . . ?
C27 C28 H28C 109.5 . . ?
H28A C28 H28C 109.5 . . ?
H28B C28 H28C 109.5 . . ?

loop_
 _geom_torsion_atom_site_label_1
 _geom_torsion_atom_site_label_2
 _geom_torsion_atom_site_label_3
 _geom_torsion_atom_site_label_4
 _geom_torsion
 _geom_torsion_site_symmetry_1
 _geom_torsion_site_symmetry_2
 _geom_torsion_site_symmetry_3
 _geom_torsion_site_symmetry_4
 _geom_torsion_publ_flag
Br1 Si1 C1 C2 100.98(13) . . . . ?
Br2 Si1 C1 C2 -132.80(12) . . . . ?
Br1 Si1 C1 C12 -76.08(16) . . . . ?
Br2 Si1 C1 C12 50.13(17) . . . . ?
C12 C1 C2 C6 2.4(3) . . . . ?
Si1 C1 C2 C6 -174.90(14) . . . . ?
C12 C1 C2 C3 179.06(17) . . . . ?
Si1 C1 C2 C3 1.7(3) . . . . ?
C6 C2 C3 C13 108.18(17) . . . . ?
C1 C2 C3 C13 -68.7(2) . . . . ?
C6 C2 C3 C15 -125.32(17) . . . . ?
C1 C2 C3 C15 57.8(3) . . . . ?
C6 C2 C3 C4 -9.34(19) . . . . ?
C1 C2 C3 C4 173.75(18) . . . . ?
C13 C3 C4 C5 -97.96(17) . . . . ?
C15 C3 C4 C5 141.95(15) . . . . ?
C2 C3 C4 C5 18.79(19) . . . . ?
C3 C4 C5 C6 -20.46(19) . . . . ?
C3 C4 C5 C19 -142.27(16) . . . . ?
C3 C4 C5 C17 93.57(18) . . . . ?
C1 C2 C6 C7 -2.1(3) . . . . ?
C3 C2 C6 C7 -179.39(17) . . . . ?
C1 C2 C6 C5 173.86(16) . . . . ?
C3 C2 C6 C5 -3.4(2) . . . . ?
C4 C5 C6 C7 -169.38(17) . . . . ?
C19 C5 C6 C7 -48.7(2) . . . . ?
C17 C5 C6 C7 73.1(2) . . . . ?
C4 C5 C6 C2 14.8(2) . . . . ?
C19 C5 C6 C2 135.49(17) . . . . ?
C17 C5 C6 C2 -102.75(18) . . . . ?
C2 C6 C7 C8 0.0(3) . . . . ?
C5 C6 C7 C8 -175.54(17) . . . . ?
C6 C7 C8 C12 1.7(3) . . . . ?
C6 C7 C8 C9 -177.84(17) . . . . ?
C7 C8 C9 C21 -51.2(2) . . . . ?
C12 C8 C9 C21 129.28(17) . . . . ?
C7 C8 C9 C10 -171.54(17) . . . . ?
C12 C8 C9 C10 8.9(2) . . . . ?
C7 C8 C9 C23 69.2(2) . . . . ?
C12 C8 C9 C23 -110.35(18) . . . . ?
C8 C9 C10 C11 -17.52(18) . . . . ?
C21 C9 C10 C11 -138.13(15) . . . . ?
C23 C9 C10 C11 99.03(17) . . . . ?
C9 C10 C11 C12 19.67(19) . . . . ?
C9 C10 C11 C27 -94.09(17) . . . . ?
C9 C10 C11 C25 142.26(15) . . . . ?
C7 C8 C12 C1 -1.3(3) . . . . ?
C9 C8 C12 C1 178.31(15) . . . . ?
C7 C8 C12 C11 -176.18(16) . . . . ?
C9 C8 C12 C11 3.4(2) . . . . ?
C2 C1 C12 C8 -0.8(3) . . . . ?
Si1 C1 C12 C8 176.25(14) . . . . ?
C2 C1 C12 C11 172.90(17) . . . . ?
Si1 C1 C12 C11 -10.0(3) . . . . ?
C27 C11 C12 C8 100.92(17) . . . . ?
C25 C11 C12 C8 -132.98(16) . . . . ?
C10 C11 C12 C8 -14.09(19) . . . . ?
C27 C11 C12 C1 -73.3(2) . . . . ?
C25 C11 C12 C1 52.8(3) . . . . ?
C10 C11 C12 C1 171.65(18) . . . . ?
C15 C3 C13 C14 57.0(2) . . . . ?
C2 C3 C13 C14 -172.75(15) . . . . ?
C4 C3 C13 C14 -61.2(2) . . . . ?
C13 C3 C15 C16 157.09(15) . . . . ?
C2 C3 C15 C16 30.7(2) . . . . ?
C4 C3 C15 C16 -82.29(19) . . . . ?
C6 C5 C17 C18 179.26(17) . . . . ?
C4 C5 C17 C18 69.0(2) . . . . ?
C19 C5 C17 C18 -56.5(2) . . . . ?
C6 C5 C19 C20 -47.8(2) . . . . ?
C4 C5 C19 C20 66.5(2) . . . . ?
C17 C5 C19 C20 -168.18(17) . . . . ?
C8 C9 C21 C22 -46.3(2) . . . . ?
C10 C9 C21 C22 67.7(2) . . . . ?
C23 C9 C21 C22 -167.04(16) . . . . ?
C8 C9 C23 C24 172.00(16) . . . . ?
C21 C9 C23 C24 -65.0(2) . . . . ?
C10 C9 C23 C24 60.0(2) . . . . ?
C12 C11 C25 C26 54.5(2) . . . . ?
C27 C11 C25 C26 177.86(15) . . . . ?
C10 C11 C25 C26 -60.62(19) . . . . ?
C12 C11 C27 C28 171.18(16) . . . . ?
C25 C11 C27 C28 43.8(2) . . . . ?
C10 C11 C27 C28 -78.0(2) . . . . ?

#==============================================================================

#==============================================================================
# Additional structures and associated data_? identifiers
# should be added at this point if there is more than one 
# structure analysis in the CIF.

_shelx_res_file
;
TITL EindSiHBr2
    shelxl.res
    created by SHELXL-2017/1 at 15:23:33 on 22-Nov-2017
CELL  0.71073 7.97160 11.06990 16.62050 89.97210 80.77040 73.31360
ZERR  2 0.00280 0.00360 0.00530 0.00400 0.00340 0.00460
LATT 1
SFAC C H BR SI
UNIT 56 92 4 2
SHEL 6.790074 0.769607
L.S. 100
FMAP 2
PLAN 25
WPDB -2
HTAB
BOND $H
CONF
LIST 4
TEMP -172.8
ACTA
SIZE 0.407 0.160 0.166
WGHT    0.046100
FVAR       0.70128
BR1   3    0.170480    1.114284    0.857818    11.00000    0.03433    0.01947 =
         0.02717   -0.00001   -0.01146   -0.01130
BR2   3   -0.221452    1.015399    0.886341    11.00000    0.02045    0.02836 =
         0.02370   -0.00422   -0.00106   -0.00301
SI1   4    0.073438    0.944762    0.867976    11.00000    0.01986    0.01488 =
         0.01385    0.00017   -0.00469   -0.00268
C1    1    0.190885    0.818291    0.786472    11.00000    0.01343    0.01052 =
         0.01384    0.00187   -0.00309   -0.00322
C2    1    0.325675    0.713358    0.808633    11.00000    0.01516    0.01325 =
         0.01455    0.00441   -0.00642   -0.00558
C3    1    0.391328    0.682873    0.891786    11.00000    0.01726    0.01619 =
         0.01395    0.00626   -0.00777   -0.00534
C4    1    0.523086    0.547771    0.872450    11.00000    0.01935    0.01668 =
         0.01954    0.00771   -0.00922   -0.00274
AFIX  23
H4A   2    0.629599    0.540065    0.897867    11.00000   -1.20000
H4B   2    0.465649    0.484224    0.895538    11.00000   -1.20000
AFIX   0
C5    1    0.578082    0.523111    0.779935    11.00000    0.01535    0.01605 =
         0.01942    0.00476   -0.00744   -0.00158
C6    1    0.428952    0.620169    0.749344    11.00000    0.01452    0.01318 =
         0.01621    0.00535   -0.00566   -0.00436
C7    1    0.400909    0.624056    0.669195    11.00000    0.01813    0.01409 =
         0.01551    0.00002   -0.00430   -0.00383
AFIX  43
H7    2    0.472217    0.560061    0.629854    11.00000   -1.20000
AFIX   0
C8    1    0.267281    0.722708    0.647325    11.00000    0.01526    0.01508 =
         0.01238    0.00336   -0.00391   -0.00643
C9    1    0.218309    0.736008    0.562188    11.00000    0.01876    0.01614 =
         0.01255    0.00282   -0.00575   -0.00544
C10   1    0.085482    0.869985    0.569846    11.00000    0.02201    0.01584 =
         0.01495    0.00447   -0.00818   -0.00429
AFIX  23
H10A  2   -0.016608    0.870439    0.542763    11.00000   -1.20000
H10B  2    0.144141    0.930593    0.543060    11.00000   -1.20000
AFIX   0
C11   1    0.019906    0.909044    0.662102    11.00000    0.01610    0.01284 =
         0.01471    0.00255   -0.00690   -0.00175
C12   1    0.163910    0.819449    0.703270    11.00000    0.01377    0.01147 =
         0.01493    0.00381   -0.00475   -0.00583
C13   1    0.489741    0.778105    0.912742    11.00000    0.01990    0.02178 =
         0.01573    0.00435   -0.00722   -0.00932
AFIX  23
H13A  2    0.580344    0.780794    0.865025    11.00000   -1.20000
H13B  2    0.403133    0.863213    0.921719    11.00000   -1.20000
AFIX   0
C14   1    0.581399    0.748857    0.987896    11.00000    0.02223    0.03060 =
         0.02139    0.00221   -0.01128   -0.00856
AFIX 137
H14A  2    0.494007    0.743258    1.035380    11.00000   -1.20000
H14B  2    0.633326    0.816310    0.998427    11.00000   -1.20000
H14C  2    0.675393    0.668327    0.977870    11.00000   -1.20000
AFIX   0
C15   1    0.250517    0.673557    0.965969    11.00000    0.02098    0.02090 =
         0.01528    0.00730   -0.00521   -0.00788
AFIX  23
H15A  2    0.311456    0.615935    1.004737    11.00000   -1.20000
H15B  2    0.199186    0.758034    0.994117    11.00000   -1.20000
AFIX   0
C16   1    0.099456    0.627232    0.945822    11.00000    0.02521    0.03003 =
         0.02690    0.00826   -0.00536   -0.01459
AFIX 137
H16A  2    0.027296    0.689604    0.913811    11.00000   -1.20000
H16B  2    0.025273    0.615590    0.996530    11.00000   -1.20000
H16C  2    0.148383    0.546629    0.914132    11.00000   -1.20000
AFIX   0
C17   1    0.752230    0.555944    0.747773    11.00000    0.01659    0.02583 =
         0.02522    0.00213   -0.00474   -0.00376
AFIX  23
H17A  2    0.768320    0.554358    0.687429    11.00000   -1.20000
H17B  2    0.738115    0.643455    0.767069    11.00000   -1.20000
AFIX   0
C18   1    0.921522    0.469927    0.772587    11.00000    0.01992    0.04727 =
         0.04338    0.00179   -0.01197   -0.00309
AFIX 137
H18A  2    0.948156    0.385525    0.746694    11.00000   -1.20000
H18B  2    0.904307    0.464268    0.832035    11.00000   -1.20000
H18C  2    1.020602    0.504861    0.754934    11.00000   -1.20000
AFIX   0
C19   1    0.596532    0.386054    0.753106    11.00000    0.02275    0.01600 =
         0.02798    0.00323   -0.00896   -0.00031
AFIX  23
H19A  2    0.649494    0.372781    0.694538    11.00000   -1.20000
H19B  2    0.681292    0.328812    0.783673    11.00000   -1.20000
AFIX   0
C20   1    0.425632    0.347053    0.764976    11.00000    0.03353    0.01685 =
         0.04039    0.00031   -0.00802   -0.00876
AFIX 137
H20A  2    0.341996    0.400007    0.732957    11.00000   -1.20000
H20B  2    0.372395    0.357788    0.822875    11.00000   -1.20000
H20C  2    0.452847    0.258342    0.746712    11.00000   -1.20000
AFIX   0
C21   1    0.380790    0.723643    0.494750    11.00000    0.02284    0.02544 =
         0.01532    0.00155   -0.00252   -0.00757
AFIX  23
H21A  2    0.449260    0.633273    0.486475    11.00000   -1.20000
H21B  2    0.337169    0.750791    0.443217    11.00000   -1.20000
AFIX   0
C22   1    0.506663    0.798066    0.510294    11.00000    0.02609    0.04096 =
         0.02617    0.00524   -0.00200   -0.01590
AFIX 137
H22A  2    0.560320    0.766744    0.558181    11.00000   -1.20000
H22B  2    0.440565    0.887654    0.520160    11.00000   -1.20000
H22C  2    0.600258    0.787783    0.462564    11.00000   -1.20000
AFIX   0
C23   1    0.132163    0.631923    0.545339    11.00000    0.02334    0.01725 =
         0.01695    0.00243   -0.00686   -0.00742
AFIX  23
H23A  2    0.223026    0.548827    0.542769    11.00000   -1.20000
H23B  2    0.036987    0.632967    0.591846    11.00000   -1.20000
AFIX   0
C24   1    0.053020    0.644836    0.466606    11.00000    0.04255    0.03103 =
         0.02244    0.00548   -0.01588   -0.01956
AFIX 137
H24A  2    0.145044    0.646609    0.420190    11.00000   -1.20000
H24B  2   -0.044583    0.723324    0.470379    11.00000   -1.20000
H24C  2    0.007936    0.572841    0.458850    11.00000   -1.20000
AFIX   0
C25   1   -0.000630    1.051318    0.675934    11.00000    0.02271    0.01248 =
         0.01956    0.00345   -0.00963   -0.00239
AFIX  23
H25A  2   -0.090271    1.100173    0.644196    11.00000   -1.20000
H25B  2   -0.047209    1.075457    0.734368    11.00000   -1.20000
AFIX   0
C26   1    0.168827    1.089355    0.652353    11.00000    0.03095    0.01568 =
         0.02445    0.00543   -0.00776   -0.00963
AFIX 137
H26A  2    0.146627    1.178158    0.669182    11.00000   -1.20000
H26B  2    0.206779    1.077968    0.593085    11.00000   -1.20000
H26C  2    0.262284    1.036454    0.679596    11.00000   -1.20000
AFIX   0
C27   1   -0.155526    0.875706    0.690263    11.00000    0.01667    0.02121 =
         0.02039    0.00017   -0.00711   -0.00535
AFIX  23
H27A  2   -0.141630    0.790217    0.667302    11.00000   -1.20000
H27B  2   -0.173023    0.871622    0.750423    11.00000   -1.20000
AFIX   0
C28   1   -0.323416    0.965381    0.667128    11.00000    0.01853    0.03523 =
         0.04492   -0.00108   -0.01377   -0.00337
AFIX 137
H28A  2   -0.349354    1.047620    0.695871    11.00000   -1.20000
H28B  2   -0.423238    0.930390    0.682546    11.00000   -1.20000
H28C  2   -0.305533    0.975752    0.608101    11.00000   -1.20000
AFIX   0
H1    2    0.098293    0.909941    0.943323    11.00000    0.01742
HKLF 4


REM  EindSiHBr2
REM R1 =  0.0298 for    5390 Fo > 4sig(Fo)  and  0.0350 for all    6332 data
REM    292 parameters refined using      0 restraints

END

WGHT      0.0461      0.0000

REM No hydrogen bonds found for HTAB generation

REM Highest difference peak  0.691,  deepest hole -0.437,  1-sigma level  0.080
Q1    1   0.2516  1.0807  0.8168  11.00000  0.05    0.62
Q2    1   0.1331  0.8818  0.8262  11.00000  0.05    0.61
Q3    1  -0.2705  1.1431  0.6302  11.00000  0.05    0.58
Q4    1   0.1560  1.1709  0.8884  11.00000  0.05    0.56
Q5    1   0.3893  0.9164  0.9131  11.00000  0.05    0.50
Q6    1   0.0907  1.1626  0.9003  11.00000  0.05    0.48
Q7    1  -0.2974  1.0597  0.9241  11.00000  0.05    0.47
Q8    1   0.5610  0.2159  0.8314  11.00000  0.05    0.47
Q9    1   0.1233  1.2455  0.6025  11.00000  0.05    0.45
Q10   1  -0.2201  0.9559  0.8475  11.00000  0.05    0.44
Q11   1   0.0165  0.9805  0.6708  11.00000  0.05    0.44
Q12   1   0.3550  0.6588  0.7788  11.00000  0.05    0.42
Q13   1  -0.1346  0.9868  0.8333  11.00000  0.05    0.42
Q14   1   0.2429  0.7826  0.6718  11.00000  0.05    0.41
Q15   1  -0.1769  0.9409  0.8575  11.00000  0.05    0.39
Q16   1   0.4506  0.6228  0.8810  11.00000  0.05    0.39
Q17   1   0.1484  1.0570  0.8201  11.00000  0.05    0.38
Q18   1   0.1861  0.6824  0.5536  11.00000  0.05    0.37
Q19   1  -0.2080  1.0750  0.9198  11.00000  0.05    0.37
Q20   1   0.6891  0.8455  0.8928  11.00000  0.05    0.37
Q21   1   0.1330  0.8071  1.1172  11.00000  0.05    0.37
Q22   1   0.4771  1.0438  0.8380  11.00000  0.05    0.37
Q23   1  -0.1740  1.0617  0.9301  11.00000  0.05    0.37
Q24   1   0.5823  0.4638  0.7673  11.00000  0.05    0.37
Q25   1   0.1708  0.6512  0.9542  11.00000  0.05    0.36
;

_shelx_res_checksum   33843

_shelx_hkl_file
;
   1   0   0  658.16   16.10
  -1   0   0  792.33   19.25
  -1   0  -1  471.31   11.95
   1   0   1  449.63   11.35
  -1  -1  -1  290.17    9.39
   0   1  -2  395.04   10.89
   0   1  -2  404.11   11.48
   0  -1   2  385.86   12.17
   0  -1   2  412.41   10.89
   0  -1   2  400.99   12.84
   0   1  -2  416.93   12.64
   0   1  -2  418.84   11.16
   0   1  -2  413.31   13.10
   1   0  -1  637.30   17.01
  -1   0   1  676.07   17.09
  -1   0   1  930.17   23.02
   1   0  -1  931.30   30.81
   1   0  -1  862.36   21.56
   0   1   2  689.06   19.11
   0   1   2  678.64   16.85
   0  -1  -2  656.00   17.21
   0   1   2  687.31   20.17
   0  -1  -2  691.96   18.70
   0   1   2  537.83   14.19
   0  -1  -2  704.61   18.05
   1   1  -1  231.22   14.25
   1   1  -1  178.02    7.46
   1   1  -1  223.71    8.32
   1   1  -1  170.78    5.54
  -1  -1   1  170.43   10.09
  -1  -1   1  217.54    9.69
  -1  -1   1  221.29    7.60
  -1  -1   1  190.46    6.85
   1   0   2    3.82    6.03
   1   0   2    7.92    5.66
  -1   0  -2   15.80   10.65
  -1   0  -2    3.62    5.81
   1   0   2    5.32    3.34
  -1   0  -2    6.59    3.37
  -1  -1  -2   10.12    5.33
  -1  -1  -2    4.63    4.44
   1   1   2   11.15    7.94
   1   1   2    8.46    8.57
   1   1   2    6.69    4.02
  -1  -1  -2   11.61    5.92
  -1  -1  -2    6.54    4.16
   0   0  -3 4144.49   50.64
  -1   1   0 1913.42   26.77
   1  -1   0 1655.90   21.67
   1  -1   0 2253.29   29.95
  -1   1   0 2062.24   27.22
   1  -1   0 1852.45   26.49
  -1   1   0 1837.21   27.15
   1  -1   0 2111.23   29.34
  -1   1   0 2250.42   29.37
   1  -1   1 1862.85   25.00
   1  -1   1 2116.52   28.50
  -1   1  -1 2065.68   27.00
   1  -1   1 1977.03   27.91
  -1   1  -1 2116.46   27.63
  -1   1  -1 1957.77   25.58
   1  -1   1 1957.52   24.71
   0   2   0 1715.34   23.65
   0   2   0 1493.37   19.91
   0  -2   0 1499.97   22.83
   0   2   0 1381.89   18.88
   0  -2   0 1521.75   22.75
   0  -2   0 1716.80   22.81
   0   2   0 1581.10   23.31
   0  -2   0 1570.73   21.62
  -1   0   2   15.16    6.05
   1   0  -2    7.26    6.15
   1   0  -2   11.49    6.68
  -1   0   2    5.36    7.00
  -1   0   2    9.50    6.66
   1   0  -2   16.70    7.60
   0  -2   1  256.07    8.29
   0  -2   1  234.69   11.10
   0   2  -1  237.25    8.86
   0  -2   1  222.40   10.19
   0   2  -1  266.62   10.14
   0   2  -1  234.83    7.06
   0  -2   1  249.08   17.42
   0   2  -1  218.74    7.43
  -1  -1   2 1691.31   23.33
  -1  -1   2 1641.16   22.09
   1   1  -2 1702.00   23.10
  -1  -1   2 1746.94   23.74
   1   1  -2 1608.62   20.33
   1   1  -2 1752.81   22.54
   1   1  -2 1562.78   22.84
  -1  -1   2 1598.18   21.38
   1   2   0   95.73    6.78
  -1  -2   0  103.54   10.22
  -1  -2   0   99.79    4.29
   1   2   0  109.08    7.40
  -1  -2   0   83.04    5.45
  -1  -2   0  109.16    6.13
  -1  -2   0   90.24    7.17
   1   2   0   98.38    3.79
   0   2   1 3867.50   48.17
   0   2   1 4697.97   57.27
   0   1  -3   42.87    5.20
   0   1  -3   41.94    4.06
   0  -1   3   48.84   11.86
   0  -1   3   33.77    5.48
   0  -1   3   38.79    5.87
   0  -1   3   33.93    3.89
   0   1  -3   44.17    7.31
   0  -1   3   33.55    4.55
   1   2   1 2382.30   32.95
   1   2   1 3082.71   37.93
  -1  -2  -1 3065.88   38.90
   1   2   1 3407.70   43.47
  -1  -2  -1 3294.18   40.60
  -1   1   1 2008.29   27.30
   1  -1  -1 1958.32   25.02
   1  -1  -1 2331.98   29.08
  -1   1   1 2243.39   27.59
  -1   1   1 2284.98   29.19
   1   0   3   97.66    4.68
  -1   0  -3   97.94    4.27
  -1   0  -3   97.67    3.87
   1   0   3   97.95    5.01
  -1   0  -3   79.32    4.87
  -1   0  -3  102.97    5.31
  -1   0  -3  110.02    6.10
   1   0   3   85.87    7.47
   0  -1  -3 1543.12   21.94
   0  -1  -3 1787.73   23.37
   0  -1  -3 1639.98   22.67
   0  -1  -3 1767.52   22.53
   0   1   3 1718.70   21.87
   0   1   3 1482.58   19.64
   0   1   3 1824.47   25.85
   0   1   3 1750.89   23.89
   1   1   3  762.51   19.63
  -1  -1  -3  633.19   15.81
   1   1   3  761.64   18.41
   1   1   3  639.15   17.36
  -1  -1  -3  638.31   20.45
  -1  -1  -3  817.53   20.11
  -1  -1  -3  752.90   18.91
  -1  -2  -2    3.95    4.21
   1   2   2    4.03    4.14
   1   2   2    3.20    2.47
   1   2   2    4.12    4.20
  -1  -2  -2    1.83    3.09
  -1  -2  -2    6.22    5.50
   0   2   2   35.77    9.75
   0   2   2   34.73    5.77
   0  -2  -2   30.48    4.98
   0   2   2   36.22    2.71
   0  -2  -2   37.75    9.14
   0   2   2   35.21    4.27
   0  -2  -2   29.88    3.73
   0   2   2   40.02    7.59
   1  -1  -2  631.19   15.41
  -1   1   2  708.73   18.43
  -1   1   2  622.60   15.94
   1  -1  -2  785.16   20.02
   1  -1  -2  683.72   16.58
   1  -1  -2  625.38   16.50
  -1   1   2  755.54   19.35
   1  -1  -2  662.93   16.78
  -1  -2   2  294.16    8.54
  -1  -2   2  298.04    7.17
   1   2  -2  325.91    9.86
   1   2  -2  305.57   26.95
  -1  -2   2  325.46    9.77
   1   2  -2  276.79    8.11
  -1  -2   2  308.10    9.13
  -1   1  -3 5415.12   66.21
  -1   1  -3 5303.68   64.36
  -1   1  -3 4992.37   60.92
   1  -1   3 5268.79   64.41
   1  -1   3 5094.85   61.96
  -1  -1   3   72.79    6.59
   1   1  -3   71.49    6.74
  -1  -1   3   63.95    4.28
   1   1  -3   64.05    6.37
   1   1  -3   69.39    4.42
  -1  -1   3   73.83    3.97
  -1  -1   3   50.30    2.99
   1   1  -3   65.24    5.41
   1   0  -3  623.71   16.00
   1   0  -3  630.88   16.81
  -1   0   3  600.86   15.60
  -1   0   3  714.79   18.69
   1   0  -3  677.72   17.48
  -1   0   3  567.21   14.85
   1   0  -3  709.94   17.03
  -1   0   3  711.13   17.03
   0   0  -4 2796.81   34.88
   0   0  -4 2699.68   34.15
   0   0  -4 2832.85   35.74
   0   0   4 2896.36   36.37
   0   0   4 2862.75   36.46
   0   0   4 2538.29   32.01
   0   0   4 2741.20   34.40
  -2  -1  -1  106.22    4.74
  -2  -1  -1   93.80    4.14
   2   1   1   88.82    3.83
  -2  -1  -1  114.84    3.68
   2   1   1  104.59    9.29
   2   1   1  119.19    5.95
   2   1   1  122.08    5.39
  -2  -1  -1  102.72    4.57
  -2  -1   0 5364.50   65.13
   2   1   0 5703.80   69.42
  -2  -1   0 3926.95   48.83
   0  -2   3 4100.21   51.11
   0  -2   3 4267.29   52.77
   0   2  -3 3946.94   48.74
   0   2  -3 4342.16   53.85
   0  -2   3 4116.62   51.34
   0   2  -3 4317.95   53.41
  -1  -2  -3  310.09    9.45
   1   2   3  321.77   10.55
  -1  -2  -3  295.04    9.13
   1   2   3  337.62   10.22
   1   2   3  373.64    9.69
  -1  -2  -3  362.30    8.97
   1   2   3  337.68    9.79
  -1  -2  -3  358.19   10.82
  -1   2  -1  886.67   22.11
   1  -2   1  880.73   21.66
   1  -2   1  900.14   22.64
   1  -2   1  803.51   20.30
  -1   2  -1  851.89   22.04
   1  -2   1  852.55   21.65
  -1   2  -1  820.40   20.70
  -1   2  -1  910.72   23.09
   2   0   1   40.13    3.55
   2   0   1   40.24    9.73
  -2   0  -1   40.51    5.53
  -2   0  -1   37.22    3.56
   2   0   1   35.40    5.94
  -2   0  -1   30.78    1.74
  -2   0  -1   37.28    7.32
   2   0   1   40.66    5.44
  -2  -1  -2   45.19    3.90
  -2  -1  -2   40.21    2.94
   2   1   2   49.86    4.66
  -2  -1  -2   42.14    3.80
   2   1   2   42.93    4.57
  -2  -1  -2   46.03    2.15
   2   1   2   52.70    2.82
   2   1   2   43.91    3.84
  -1  -1  -4 3689.35   46.02
   1   1   4 3780.21   47.64
   1   1   4 3697.70   46.03
   1   1   4 3768.88   45.82
   1   1   4 3258.66   40.48
  -1  -1  -4 3340.92   41.12
  -1  -1  -4 3921.57   49.37
  -2   0   0  859.59   20.77
   2   0   0  871.39   21.59
  -2   0   0  889.09   22.38
   2   0   0  913.79   24.56
  -2   0   0  799.37   19.43
   2   0   0  832.14   20.15
  -2   0   0  727.89   18.83
   0  -2  -3  280.50    8.73
   0  -2  -3  270.79   13.13
   0   2   3  257.31    8.79
   0  -2  -3  290.76    8.39
   0   2   3  287.72   13.02
   0   2   3  300.97    9.68
   0   2   3  284.82    8.12
   0  -2  -3  290.61    8.47
  -2   0  -2  744.14   19.85
   2   0   2  739.87   18.73
  -2   0  -2  788.72   20.09
  -2   0  -2  818.60   20.51
   2   0   2  854.54   21.60
  -1   2  -2 1022.83   25.11
   1  -2   2  996.66   24.24
   1  -2   2  990.55   25.28
  -1   2  -2  967.24   24.52
  -1   2  -2 1040.53   25.61
   1  -2   2 1036.68   27.92
  -1   2  -2  941.60   23.73
   1  -2   2  933.20   23.46
  -1   2   1 6218.80  139.77
   1  -2  -1 5101.07   62.15
   1  -2  -1 5512.41  123.76
  -1  -3   0 1864.61   25.12
   1   3   0 1739.47   23.32
   1   3   0 1916.72   24.04
   1   3   0 2254.49   29.73
   1   3   0 2127.77   26.48
  -1  -3   0 2204.78   28.92
  -1  -3   0 2126.98   26.31
  -1  -3   0 1742.57   22.56
  -2  -2  -1 3347.11   41.62
  -2  -2  -1 4252.82   52.21
  -2  -2  -1 4011.60   49.74
  -2  -2  -1 4386.09   53.14
   2   2   1 3332.79   41.72
  -1  -2   3  100.35   12.23
  -1  -2   3   95.01   10.79
  -1  -2   3   78.44    2.63
   1   2  -3   98.83    4.09
  -1  -2   3   99.46    5.06
   1   2  -3   96.57    5.60
   1   2  -3  100.93    6.84
   1   2  -3   94.79    4.54
   2   2   0 1797.26   23.61
  -2  -2   0 1251.26   17.10
  -2  -2   0 1355.26   18.00
   2   2   0 1248.97   16.96
   2   2   0 1677.80   21.95
   2   2   0 1263.78   17.34
  -2  -2   0 1709.94   22.29
  -2  -2   0 1641.81   21.22
  -1   1   3  745.23   19.30
  -1   1   3  804.17   21.29
   1  -1  -3  728.58   19.56
   1  -1  -3  750.59   18.16
  -1   1   3  681.83   20.05
   1  -1  -3  777.69   19.94
  -1   1   3  669.78   16.31
   1  -1  -3  780.34   20.00
   1   3   1   33.86    3.25
   1   3   1   35.46    6.39
  -1  -3  -1   30.90    4.45
  -1  -3  -1   31.69    4.49
  -1  -3  -1   42.51    8.08
  -1  -3  -1   26.90    5.02
  -1  -3  -1   34.87    1.96
   1   3   1   35.74    5.16
  -2   0   1 3412.35   43.53
   2   0  -1 4210.77   51.20
  -2   0   1 4428.65   54.63
   2   0  -1 4536.29   56.21
  -2   0   1 4204.81   52.15
  -2   0   1 3290.97   41.44
   0   3   0 1564.21   21.57
   0  -3   0 1616.65   22.36
   0  -3   0 1806.83   24.25
   0  -3   0 1671.07   21.82
   0   3   0 1723.44   22.69
   0   3   0 1840.68   25.22
   0   3   0 1400.33   18.72
   0  -3   0 1582.34   21.16
  -1  -3   1  714.75   17.95
   1   3  -1  764.78   20.16
  -1  -3   1  494.96   12.24
   1   3  -1  599.50   15.72
  -1  -3   1  650.95   22.46
   1   3  -1  710.94   18.18
  -1  -3   1  742.65   19.35
   1   3  -1  665.12   16.08
   0   3  -1   95.59    7.94
   0   3  -1   84.48    3.56
   0  -3   1   96.90    4.81
   0   3  -1   88.48    4.89
   0  -3   1   90.21    4.10
   0   3  -1  104.16    9.76
   0  -3   1   99.44    5.08
   0  -3   1   94.09    5.91
  -2  -2  -2 3097.11   37.58
  -2  -2  -2 3232.08   40.51
   2   2   2 2899.26   36.92
  -2  -2  -2 3417.29   42.97
  -2  -2  -2 3517.35   42.89
   2   2   2 3667.39   45.02
  -2  -1  -3 1172.75   29.46
  -2  -1  -3 1139.48   28.44
   2   1   3 1127.01   27.88
   2   1   3 1200.62   27.47
   2   1   3  992.74   24.24
  -2  -1  -3 1104.17   27.22
  -2  -1  -3  886.58   21.12
  -2  -1  -3 1094.41   27.25
  -2  -2   1  436.82   11.57
  -2  -2   1  544.94   14.28
  -2  -2   1  537.62   14.59
   2   2  -1  566.76   15.07
  -2  -2   1  457.53   12.39
   2   2  -1  421.57   11.76
   2   2  -1  567.56   16.80
  -2  -2   1  370.42   11.48
   0   3   1 1652.11   22.87
   0  -3  -1 2239.15   29.40
   0  -3  -1 1967.93   26.34
   0   3   1 1978.67   26.68
   0  -3  -1 1859.54   24.90
   0   3   1 2322.76   33.31
   0  -3  -1 2124.03   26.80
   0   3   1 2208.29   28.01
   1   1  -4  180.98    7.40
   1   1  -4  145.86    6.54
  -1  -1   4  191.20    6.37
  -1  -1   4  195.32    9.73
   1   1  -4  189.01    6.63
   1   1  -4  160.09    6.48
  -1  -1   4  125.69    4.80
  -2   0  -3 2089.46   27.56
   2   0   3 1989.48   36.03
  -2   0  -3 1917.72   25.55
   2   0   3 1853.52   24.82
   2   0   3 2155.74   28.98
  -2   0  -3 2027.68   29.28
   1   0  -4  224.90    8.84
   1   0  -4  282.70    7.56
  -1   0   4  293.71   15.92
  -1   0   4  204.47    9.62
  -1   0   4  294.83    9.67
   1   0  -4  274.55    8.67
   1   0  -4  265.17    9.43
  -1   0   4  247.69    8.05
   1   3   2  301.03    9.04
  -1  -3  -2  341.33   10.78
   1   3   2  362.56   11.89
  -1  -3  -2  310.45    9.89
  -1  -3  -2  267.20    8.56
   1   3   2  275.75   16.66
  -2  -1   2 3193.96   40.71
  -2  -1   2 3096.23   39.39
   2   1  -2 3046.70   38.47
  -2  -1   2 2478.40   32.35
   2   1  -2 2444.12   32.40
  -2  -1   2 2409.60   29.09
   2   1  -2 3238.83   41.03
  -1   2  -3 2303.69   29.60
  -1   2  -3 2126.43   28.25
  -1   2  -3 2325.70   29.75
   1  -2   3 2330.09   30.05
   1  -2   3 2285.69   30.35
  -1   2  -3 2223.00   30.84
   1  -2   3 2340.65   29.59
   1  -2   3 2161.83   29.95
  -1   2   2 3184.23   40.36
  -1   2   2 3234.87   41.25
  -1   2   2 3638.24   45.71
   1  -2  -2 3505.89   43.08
  -1   2   2 3420.50   42.17
  -1   2   2 3343.21   43.04
   1  -2  -2 3807.45   48.84
   0  -2   4 6422.32   78.11
   0   2  -4 6764.24  151.78
   0   2  -4 6158.99   75.59
   0  -2   4 6660.95  149.34
   0  -3   2  102.22    4.11
   0   3  -2   99.34    3.94
   0  -3   2   95.04    6.21
   0   3  -2   86.05    5.41
   0  -3   2  107.10    5.22
   0   3  -2  105.86    7.75
   0  -3   2   99.54    4.93
   0   3  -2   99.58    5.25
   2  -1   1   25.57    4.09
  -2   1  -1   29.10    7.13
  -2   1  -1   23.61    4.87
   2  -1   1   34.08   15.48
   2  -1   1   27.03   10.65
  -2   1  -1   24.23    4.25
  -2   1  -1   26.05   11.06
   2  -1   1   21.81    4.76
  -1  -2  -4   52.22    7.94
   1   2   4   59.27   16.21
   1   2   4   55.42    4.52
  -1  -2  -4   69.20    4.53
  -1  -2  -4   61.85    5.76
   1   2   4   55.95    4.94
  -1  -2  -4   64.07    5.13
   1   2   4   69.14    3.17
   0   0  -5 5941.07   72.85
   0   0   5 6171.88   75.00
   2  -1   0 1950.56   24.72
  -2   1   0 1856.92   25.75
  -2   1   0 2361.09   31.40
  -2   1   0 1886.77   24.26
   2   0  -2   26.63    6.92
  -2   0   2   33.10    4.96
  -2   0   2   38.01    4.28
   2   0  -2   32.79    5.34
  -2   0   2   37.81    5.06
   2   0  -2   41.45    6.03
   2  -1   2  483.32   11.88
  -2   1  -2  585.08   14.46
   2  -1   2  504.62   13.85
  -2   1  -2  541.19   15.41
  -2   1  -2  554.10   16.47
  -2   1  -2  585.52   15.89
   2  -1   2  625.55   21.01
   2  -1   2  593.84   18.38
  -1   0  -5  999.47   25.80
   1   0   5 1036.42   26.27
   1   0   5  990.15   24.99
  -1   0  -5  965.87   24.15
  -1   0  -5 1065.26   27.68
   1   0   5  969.89   24.17
  -1   0  -5  987.00   24.86
   1   0   5  973.99   24.67
   2   2   3  233.23    8.39
  -2  -2  -3  235.12    6.64
   2   2   3  196.13    5.99
   2   2   3  246.90    7.58
   2   2   3  217.58    8.42
  -2  -2  -3  216.72    6.65
  -2  -2  -3  238.35    8.60
  -2  -2  -3  208.84    8.11
   0  -3  -2 3200.49   40.95
   0  -3  -2 2923.85   38.06
   0  -3  -2 3297.83   42.85
   0   3   2 3492.87   43.12
   0  -3  -2 3304.28   40.58
   0   3   2 3698.34   47.06
   0  -3  -2 3497.68   44.11
   0   3   2 2691.87   35.42
   0  -1   5 1322.49   18.91
   0  -1   5 1328.76   20.37
   0  -1   5 1239.56   28.95
   0   1  -5 1372.67   20.23
   0  -1   5 1292.95   22.45
   0   1  -5 1245.40   17.80
   0   1  -5 1250.49   29.90
   0   1  -5 1230.39   17.60
   0   2   4 3768.49   46.80
   0  -2  -4 3011.51   40.31
   0   2   4 3157.65   40.87
   0  -2  -4 3840.27   47.74
   0  -2  -4 3713.92   46.78
  -2  -2   2   71.30    4.59
  -2  -2   2   87.54    7.23
   2   2  -2   74.69    5.06
  -2  -2   2   83.76    4.19
   2   2  -2   93.43    5.25
  -2  -2   2   73.55    4.84
  -2  -2   2   58.11    3.11
  -2  -2   2   81.30    5.32
  -1  -1  -5 2460.62   33.15
  -1  -1  -5 2193.74   29.31
   1   1   5 2437.10   32.54
   1   1   5 2361.97   30.45
  -1  -1  -5 2544.60   32.68
  -1  -1  -5 2289.32   30.25
  -2   1   1 4024.87   51.20
  -2   1   1 3917.18   49.39
  -2   1   1 4771.76   59.38
  -2   1   1 4015.56   49.60
   2  -1  -1 4227.41   51.82
   2  -1  -1 5183.12   64.74
   1   2  -4  682.71   17.21
  -1  -2   4  852.94   21.94
   1   2  -4  792.24   19.88
  -1  -2   4  735.55   17.81
   1   2  -4  869.68   22.60
  -1  -2   4  846.72   21.50
  -1  -2   4  803.34   20.84
  -1  -2   4  843.80   22.17
  -2  -1  -4 2588.06   34.50
  -2  -1  -4 2690.48   35.15
  -2  -1  -4 2438.91   29.94
   2   1   4 2579.96   33.04
  -2  -1  -4 2787.32   35.59
   1   3   3 1614.62   27.47
  -1  -3  -3 1632.07   22.52
   1   3   3 1774.15   21.60
  -1  -3  -3 1840.21   25.27
  -1  -3  -3 1819.09   25.49
   1  -1  -4  461.59   13.51
   1  -1  -4  488.00   14.49
   1  -1  -4  545.75   13.67
  -1   1   4  494.36   12.75
  -1   1   4  416.59   12.05
   1  -1  -4  505.06   14.13
  -1   1   4  566.21   16.32
  -1   1   4  458.63   12.97
  -2  -3   0 1218.79   29.24
   2   3   0 1214.23   29.05
  -2  -3   0 1088.55   26.32
   2   3   0  914.34   21.66
  -2  -3   0  815.40   21.22
  -2  -3   0  905.09   23.92
  -2  -3   0 1157.04   27.83
  -2  -3   0 1143.91   27.95
   2   0   4  891.40   23.78
   2   0   4  802.50   19.29
   2   0   4  790.06   20.16
  -2   0  -4  813.02   20.94
  -2   0  -4  863.60   22.35
  -2   0  -4  865.56   23.15
  -2   0  -4  855.27   20.46
   2   0   4  886.96   24.06
   0   3  -3  108.61    5.51
   0   3  -3  117.78    9.38
   0  -3   3  114.59    5.70
   0   3  -3  121.76    7.72
   0  -3   3  113.17    5.60
   0  -3   3  116.36    6.74
   0  -3   3  118.91    5.17
   0   3  -3  119.42    4.30
   2  -1   3 2721.25   33.07
  -2   1  -3 2712.85   35.01
  -2   1  -3 2590.73   33.92
   2  -1   3 2900.43   38.21
  -2   1  -3 2673.36   36.06
   2  -1   3 2763.00   37.20
   2  -1   3 2441.69   31.89
  -2   1  -3 2701.33   32.72
  -1   1  -5  120.07    5.65
  -1   1  -5  116.97    5.67
   1  -1   5  137.95   15.02
   1  -1   5  126.49    9.07
   1  -1   5  117.85    4.52
   1  -1   5  115.32    5.94
  -1   1  -5  127.54    6.37
  -1   1  -5  120.97    5.84
  -1   2  -4 1660.72   23.11
   1  -2   4 1857.67   25.88
   1  -2   4 1552.14   26.93
   1  -2   4 1843.04   24.25
  -1   2  -4 1605.13   23.20
  -1  -3   3 2133.44   28.74
   1   3  -3 2242.81   29.96
   1   3  -3 1980.36   26.75
  -1  -3   3 2145.33   29.38
  -1  -3   3 2248.50   30.28
   1   3  -3 2327.23   34.13
  -1   2   3    0.82    4.62
  -1   2   3   -0.49    4.29
   1  -2  -3   -0.66    4.91
   1  -2  -3    5.32    5.23
  -1   2   3    0.91    3.22
   1  -2  -3    2.75    2.75
   1  -2  -3    1.17    2.03
   2   1  -3 6374.35   77.99
  -2  -1   3 6836.16  154.27
  -2  -1   3 5415.90   67.28
   2   3   2 4142.73   51.50
  -2  -3  -2 4429.74   55.78
  -2  -3  -2 4374.91   54.74
   2   3   2 4633.43   57.25
   2   3   2 3359.15   43.85
  -2  -3   1 1354.72   19.52
  -2  -3   1 1318.94   17.34
  -2  -3   1 1130.23   16.87
  -2  -3   1  981.16   23.96
   2   3  -1 1371.60   19.88
  -2  -3   1 1238.62   29.13
   2   3  -1 1093.19   16.22
  -2  -3   1 1287.67   29.50
   0  -3  -3  335.35   10.85
   0  -3  -3  362.77   11.22
   0  -3  -3  372.93   12.37
   0   3   3  379.93   11.39
   0   3   3  394.71   11.12
   0   3   3  356.65   11.81
   0  -3  -3  367.72   11.12
   0   3   3  325.13   10.19
   1  -3   1 1362.00   19.57
  -1   3  -1 1414.87   20.67
   1  -3   1 1531.06   23.05
  -1   3  -1 1530.38   22.46
   1  -3   1 1484.49   20.92
   1  -3   1 1447.61   21.41
  -1   3  -1 1377.86   19.84
  -1   3  -1 1488.67   20.72
   2   2   4 3270.08   41.66
   2   2   4 3073.94   37.53
   2   2   4 3203.43   39.80
  -2  -2  -4 3067.20   39.46
   2   2   4 3197.99   42.46
  -2  -2  -4 2728.07   34.32
  -1   3   0  548.89   15.80
   1  -3   0  521.13   14.36
  -1   3   0  542.13   14.97
  -1   3   0  581.68   16.40
   1  -3   0  549.43   15.44
   1  -3   0  612.40   22.30
   1  -3   0  537.38   14.62
  -1   3   0  567.12   15.53
  -2   0   3  176.73    7.18
  -2   0   3  240.56    9.82
  -2   0   3  218.17    8.23
   2   0  -3  241.58    8.60
   2   0  -3  219.09    7.86
   2   0  -3  188.50    8.28
   2  -1  -2 2128.72   28.16
  -2   1   2 1845.96   25.69
   2  -1  -2 2326.75   28.70
  -2   1   2 2216.49   27.16
   2  -1  -2 2481.55   33.97
  -2   1   2 2340.81   31.48
  -2   1   2 1913.02   26.77
  -2   1   2 2122.03   28.39
  -1  -1   5   84.51    4.73
  -1  -1   5   79.36    5.52
   1   1  -5   78.71   11.72
   1   1  -5   79.86    4.12
  -1  -1   5   59.18    3.76
   1   1  -5   55.39    3.71
   1   1  -5   79.02    5.71
  -1  -1   5   87.47    9.89
   0   2  -5    1.71    4.61
   0  -2   5    2.91    3.04
   0  -2   5    6.58    5.55
   0  -2   5    3.45    2.77
   0   2  -5    8.25    5.54
   0   2  -5    5.26    3.60
   0  -2   5    2.42    3.05
   0   2  -5    3.63    2.50
  -2  -2   3 5807.96   72.03
  -2  -2   3 4952.93   62.33
  -2  -2   3 5583.24   68.77
   2   2  -3 4949.13   63.45
   1   2   5  155.82    4.83
  -1  -2  -5  160.49    5.35
   1   2   5  132.04    7.60
  -1  -2  -5  129.85    6.17
   1   2   5  142.99    6.83
  -1  -2  -5  141.08    6.08
  -1  -2  -5  122.61    6.70
   1   2   5  138.84    6.66
  -1   0   5   70.29    8.12
  -1   0   5   60.98    4.75
  -1   0   5   45.05    3.71
   1   0  -5   45.20    4.94
   1   0  -5   60.60    6.04
   1   0  -5   69.61    3.51
  -1   0   5   66.63    4.67
   1   0  -5   60.36    5.89
   1  -3   2  742.97   20.09
  -1   3  -2  778.79   20.22
   1  -3   2  766.04   19.74
   1  -3   2  701.85   18.62
  -1   3  -2  798.85   23.38
  -1   3  -2  741.29   20.28
  -1   3  -2  712.78   18.94
   1  -3   2  790.82   21.15
   1  -3  -1 1321.39   19.40
   1  -3  -1 1227.01   21.27
   1  -3  -1 1421.52   21.11
  -1   3   1 1339.26   19.44
   1  -3  -1 1236.70   18.16
  -1   3   1 1306.26   18.80
  -1   3   1 1272.64   18.95
  -1   3   1 1332.38   20.32
   2   3   3 1446.17   22.21
  -2  -3  -3 1660.88   23.00
  -2  -3  -3 1760.23   21.14
   2   3   3 1825.90   25.93
   2   3   3 1645.31   22.90
  -2  -3  -3 1738.58   24.57
  -2  -3  -3 1319.85   15.99
   2   3  -2 2040.43   27.44
  -2  -3   2 2473.41   32.08
   2   3  -2 2288.36   30.33
  -2  -3   2 2586.31   31.52
   2   3  -2 2593.39   31.88
  -2  -3   2 2296.21   30.33
  -2  -3   2 2578.48   33.89
   2   3  -2 2653.11   35.00
   2  -1   4   20.01    9.09
   2  -1   4   19.81   10.61
  -2   1  -4   12.15    6.55
   2  -1   4   18.67    4.09
   2  -1   4   17.50    5.73
  -2   1  -4   20.39    2.89
  -2   1  -4   15.42    5.09
   2  -1   4   15.99    3.91
   1   4   0  276.45    8.70
   1   4   0  397.05   13.31
  -1  -4   0  341.80    9.43
  -1  -4   0  313.72   10.97
   1   4   0  356.83   10.18
  -1  -4   0  374.91   11.56
   1   4   0  296.10   10.74
  -1  -4   0  250.34   11.21
  -1  -3  -4   12.83    5.01
  -1  -3  -4    6.54    7.93
   1   3   4   18.13    5.17
   1   3   4   14.90    2.62
   1   3   4   22.10    9.14
  -1  -3  -4   16.16    3.68
  -1  -3  -4   13.98    3.40
   1   3   4   11.96    3.79
   2  -2   1  800.14   20.95
  -2   2  -1  734.84   19.97
   2  -2   1  700.66   18.87
  -2   2  -1  776.08   19.70
   2  -2   1  643.62   16.41
  -2   2  -1  801.46   20.90
   2  -2   1  841.18   22.59
  -2   2  -1  745.00   19.31
   0  -3   4   26.10    5.78
   0   3  -4   24.02    5.66
   0  -3   4   33.03    5.58
   0   3  -4   25.66    3.78
   0   3  -4   29.98   10.72
   0   3  -4   30.91   16.47
   0  -3   4   26.87    3.95
   0  -3   4   27.16    4.45
  -2  -1  -5 1462.47   22.54
  -2  -1  -5 1529.06   22.21
   2   1   5 1410.27   19.17
  -2  -1  -5 1374.21   18.21
  -2  -1  -5 1571.84   22.95
   2   1   5 1237.91   17.06
   2   1   5 1466.87   21.24
   2   1   5 1523.57   22.80
   0   0   6  296.20    9.29
   0   0  -6  302.63   12.50
   0   0  -6  331.26   10.73
   0   0  -6  305.68   10.10
   0   0   6  324.12   10.93
   0   0   6  309.12    9.59
   0   0   6  341.05   10.81
   0   0  -6  336.60   11.72
   0   2   5 6098.92  137.63
   0  -2  -5 7049.53  158.45
   1   4   1 2018.92   25.37
  -1  -4  -1 1494.32   20.80
   1   4   1 1638.62   22.16
  -1  -4  -1 2111.70   28.74
   1   4   1 2202.60   30.52
  -1  -4  -1 1948.78   24.55
  -1  -4  -1 1687.88   24.74
  -1  -4  -1 1713.65   26.16
  -1  -4   1 4247.36   51.42
   1   4  -1 5737.20   71.75
  -1  -4   1 4992.83   62.81
  -1  -4   1 5807.16   71.64
   1   4  -1 4715.84   58.92
  -1  -4   1 5350.00   65.07
   1   4  -1 4435.21   53.37
  -2   2   0    3.81    3.56
   2  -2   0    2.44    5.34
  -2   2   0    7.06    3.39
   2  -2   0    8.41    4.44
   2  -2   0    2.10    3.25
  -2   2   0    4.65    5.08
   2  -2   0    5.90    6.10
  -2   2   0    3.78    4.92
  -1   0  -6  634.87   17.67
   1   0   6  573.81   15.51
   1   0   6  594.20   16.34
  -1   0  -6  582.58   15.83
   1   0   6  620.38   18.02
  -1   0  -6  622.22   17.75
  -1   0  -6  578.90   16.38
   1   0   6  578.55   16.02
   2   0   5   95.64    4.93
  -2   0  -5   95.89    6.55
   2   0   5   96.62    4.30
  -2   0  -5   98.67    5.95
  -2   0  -5  107.25    6.63
  -2   0  -5  102.00    9.10
   2   0   5  109.23    6.91
  -2   0  -5   96.05    6.88
  -2   2  -2  168.32    6.36
   2  -2   2  178.09    8.09
   2  -2   2  160.93    7.95
   2  -2   2  171.21    6.47
  -2   2  -2  186.15   10.15
  -2   2  -2  180.60    7.10
  -2   2  -2  170.60    8.05
   2  -2   2  185.97    7.65
   0   1  -6 3809.36   49.17
   0  -1   6 3789.02   48.38
   0  -1   6 3708.70   47.67
   0   1  -6 3443.37   43.73
   1   3  -4  154.17    7.57
   1   3  -4  183.81    7.97
   1   3  -4  180.21    9.28
  -1  -3   4  177.87   15.77
  -1  -3   4  181.53    7.38
  -1  -3   4  163.69    7.59
  -1  -2   5   77.39    5.30
   1   2  -5   78.52    8.09
  -1  -2   5   72.75   10.87
   1   2  -5   51.87    3.08
  -1  -2   5   70.64    3.62
   1   2  -5   72.80    4.63
  -1  -2   5   78.41    5.04
  -1  -2   5   93.92   13.28
  -1   3  -3 1816.83   25.72
   1  -3   3 1882.31   26.93
  -1   3  -3 1992.18   27.75
   1  -3   3 2026.17   27.89
  -1   3  -3 1955.05   28.17
   1  -3   3 2018.54   26.95
   1  -3   3 1785.40   25.10
  -1   3  -3 2014.56   27.74
  -1  -1  -6   19.67    8.93
   1   1   6   12.70    8.16
   1   1   6   16.98    9.37
  -1  -1  -6    6.39    4.40
  -1  -1  -6   12.80    8.52
  -1  -1  -6   15.03    3.57
   1   1   6   12.96    3.27
   1   1   6   16.63    4.22
   1  -2   5  354.25   10.96
  -1   2  -5  371.97   11.01
  -1   2  -5  376.25   12.36
   1  -2   5  361.14   12.84
   1  -2   5  378.89   11.82
  -1   2  -5  355.30   11.01
   3   1   1  524.53   14.50
  -3  -1  -1  555.53   15.63
  -3  -1  -1  580.83   14.52
  -3  -1  -1  491.94   14.99
   3   1   1  602.37   16.82
  -3  -1  -1  423.63   12.31
  -3  -1  -1  543.15   13.78
  -3  -1  -1  530.85   14.44
   0   4   0  214.01    7.26
   0   4   0  241.78    8.95
   0  -4   0  276.00   13.19
   0  -4   0  256.75    8.92
   0   4   0  280.92   13.52
   0  -4   0  256.90    8.41
   0  -4   0  263.90    9.96
   0   4   0  269.19    9.08
   1  -2  -4  353.02    9.99
   1  -2  -4  344.86   10.75
   1  -2  -4  346.96   15.98
   1  -2  -4  344.53   11.97
  -1   2   4  338.18   11.07
  -1   2   4  344.43   10.75
  -1   2   4  376.72   13.25
   1  -1  -5 1434.22   21.59
  -1   1   5 1497.63   19.99
   1  -1  -5 1462.46   21.02
  -1   1   5 1536.70   22.94
  -1   1   5 1337.18   19.98
   1  -1  -5 1525.40   20.22
   1  -1  -5 1210.04   23.10
  -1   1   5 1116.64   16.97
  -1   3   2 2644.47   34.88
  -1   3   2 2574.31   33.20
   1  -3  -2 2734.16   37.13
   1  -3  -2 2525.98   33.23
  -1   3   2 2502.56   33.28
  -1   3   2 2587.33   35.14
   1  -3  -2 2662.83   34.63
   1  -3  -2 2377.62   31.88
   2   1  -4 7301.80  164.11
  -2  -1   4 6391.52  144.12
  -2  -1   4 7875.80  177.40
   0   4  -1   33.79    3.48
   0  -4   1   42.85   13.09
   0   4  -1   43.26    5.32
   0   4  -1   42.91    6.70
   0  -4   1   32.11    5.81
   0  -4   1   37.60    4.86
   0   4  -1   46.22   13.01
   0  -4   1   37.53   10.07
   1   4   2 9999.00  225.17
  -1  -4  -2 7311.51  164.28
   1   4   2 7534.62  168.96
  -2   1   3   19.88   10.88
   2  -1  -3   22.35    7.51
  -2   1   3   19.73    5.32
   2  -1  -3   28.91    5.59
   2  -1  -3   25.55    2.28
   2  -1  -3   20.94    3.10
  -2   1   3   17.52    2.95
   2  -1  -3   24.34   11.65
  -3  -1  -2  301.59   10.04
   3   1   2  286.20    9.79
  -3  -1  -2  294.76    8.35
  -3  -1  -2  336.02    8.63
  -3  -1  -2  291.86    9.41
   3   1   2  248.07    8.48
  -3  -1  -2  283.83   10.65
   3   1   2  318.82   11.04
  -2   2   1 1969.08   27.81
  -2   2   1 1920.53   26.82
   2  -2  -1 1939.19   26.75
  -2   2   1 2179.67   28.31
  -2   2   1 2319.16   32.49
   2  -2  -1 2373.24   33.13
   2  -2  -1 2209.06   29.31
  -3  -1   0 1137.67   27.94
  -3  -1   0  867.99   22.35
  -3  -1   0 1172.64   28.06
  -3  -1   0 1163.69   29.30
  -3  -1   0  935.72   23.69
  -3  -1   0 1110.00   27.13
   3   1   0 1239.41   30.17
   3   1   0 1017.38   25.38
   0   1   6  451.35   13.75
   0   1   6  459.98   14.48
   0  -1  -6  431.75   13.01
   0   1   6  477.13   14.26
   0   1   6  394.00   12.26
   0  -1  -6  447.83   12.92
   0  -1  -6  390.31   12.18
   0  -1  -6  460.69   13.80
   0   3   4 1013.33   15.49
   0   3   4  907.38   22.73
   0  -3  -4  956.44   16.55
   0  -3  -4 1034.69   25.03
   0   3   4 1020.92   17.27
   0  -3  -4 1018.31   25.26
   0  -3  -4 1023.95   24.62
   0   3   4 1103.11   18.03
   1   4  -2 5130.59   63.42
   1   4  -2 5533.74   70.25
  -1  -4   2 5046.11   61.99
   1   4  -2 4239.53   50.66
  -1  -4   2 4861.52   61.82
  -1  -4   2 5320.51   66.29
   1   4  -2 4495.39   56.37
  -3  -2  -1  510.97   13.48
  -3  -2  -1  406.38   15.43
   3   2   1  505.45   14.95
  -3  -2  -1  436.69   12.21
  -3  -2  -1  352.71   10.30
  -3  -2  -1  479.48   13.48
   3   2   1  404.90   14.00
   3   2   1  519.87   13.73
   1  -1   6 2746.58   35.70
  -1   1  -6 2618.75   33.85
   1  -1   6 2757.70   39.52
  -1   1  -6 2546.27   33.39
  -1   1  -6 2710.92   36.62
   1  -1   6 2618.54   35.95
  -1   1  -6 2744.51   41.03
   0   4   1 1507.37   21.78
   0   4   1 1758.93   26.02
   0   4   1 1615.03   23.00
   0  -4  -1 1525.95   22.69
   0  -4  -1 1678.16   23.84
   0  -4  -1 1484.46   21.62
   0  -4  -1 1564.23   21.24
   0   4   1 1252.26   19.00
   2   2   5 1360.98   18.00
  -2  -2  -5 1549.68   20.54
   2   2   5 1430.34   21.46
  -2  -2  -5 1531.89   22.93
  -2  -2  -5 1352.86   20.09
   2   2   5 1276.47   18.09
  -2   2  -3  460.75   13.48
   2  -2   3  447.56   13.88
   2  -2   3  413.86   12.49
  -2   2  -3  425.79   14.27
  -2   2  -3  414.10   12.63
  -2   2  -3  453.44   12.47
   2  -2   3  445.13   12.24
   2  -2   3  447.65   14.02
  -3  -2   0  521.52   14.11
   3   2   0  420.43   16.65
  -3  -2   0  528.71   14.82
   3   2   0  539.83   15.01
  -3  -2   0  451.49   12.26
  -3  -2   0  394.43   11.32
   3   2   0  409.22   12.00
  -3  -2   0  534.25   15.23
   3   2   2   64.74    7.32
  -3  -2  -2   63.73    4.39
   3   2   2   75.58    4.32
  -3  -2  -2   65.15   10.74
  -3  -2  -2   53.64    6.08
   3   2   2   74.45    6.60
  -3  -2  -2   70.80    4.74
  -3  -2  -2   72.72    3.64
   2   3   4 3017.18   36.07
  -2  -3  -4 2858.24   37.50
   2   3   4 3460.91   44.10
  -2  -3  -4 3046.67   38.95
  -2  -3  -4 3467.61   45.65
  -2  -3  -4 3569.76   42.55
   2   3   4 3306.32   42.55
   2   3  -3 1430.99   21.50
  -2  -3   3 1482.46   21.08
  -2  -3   3 1503.37   19.27
   2   3  -3 1283.64   18.30
   2   3  -3 1562.04   19.92
   2   3  -3 1645.59   25.17
  -2  -3   3 1585.92   22.92
  -2  -3   3 1434.63   20.38
   2   0  -4 4684.95   59.03
   2   0  -4 4469.88   56.51
  -2   0   4 3801.97   48.53
  -2   0   4 4152.45   52.01
  -2   0   4 4809.07   61.95
   0  -4   2  221.02    8.11
   0   4  -2  205.68    8.15
   0  -4   2  202.71    7.35
   0   4  -2  214.26    8.70
   0  -4   2  207.83    9.96
   0   4  -2  198.80   11.06
   0  -4   2  214.19    7.07
   0   4  -2  195.71    6.51
   2   2  -4  662.23   22.26
  -2  -2   4  674.38   18.35
   2   2  -4  646.20   16.59
   2   2  -4  749.79   18.76
  -2  -2   4  631.65   16.02
  -2  -2   4  737.54   20.53
  -2  -2   4  729.02   18.33
  -2  -2   4  722.68   19.35
  -3   0  -1   63.45    5.43
   3   0   1   73.29    5.83
  -3   0  -1   72.78    4.85
  -3   0  -1   53.98    3.86
   3   0   1   65.55    3.36
   3   0   1   57.41    4.64
  -3   0  -1   57.54    9.08
   3   0   1   69.97    5.54
   2   4   0 1103.90   27.08
  -2  -4   0 1156.06   28.11
  -2  -4   0  941.63   24.17
   2   4   0 1226.80   30.31
  -2  -4   0  846.22   21.98
  -2  -4   0 1154.57   29.00
   2   4   0  997.93   23.60
  -2  -4   0 1055.30   26.06
   2   4   1  734.11   17.86
  -2  -4  -1  929.63   22.34
  -2  -4  -1  730.31   20.10
   2   4   1  879.72   22.17
  -2  -4  -1  933.72   24.15
   2   4   1 1008.52   26.92
  -2  -4  -1  878.57   22.61
  -2  -4  -1  693.77   18.55
   3   1   3 2125.67   29.63
  -3  -1  -3 2412.60   32.17
   3   1   3 2423.38   32.66
   3   1   3 2668.00   37.95
  -3  -1  -3 2565.21   34.40
   3   1  -1 3481.58   45.37
  -3  -1   1 3234.74   40.82
  -3  -1   1 2459.50   33.50
   3   1  -1 2519.69   33.81
  -3  -1   1 3351.38   42.73
   3   1  -1 3223.57   40.53
   3   1  -1 2657.68   32.81
  -3  -1   1 3233.98   39.49
   2  -1   5 3457.63   42.16
   2  -1   5 3508.06   43.01
   2  -1   5 3539.43   46.28
  -2   1  -5 3438.88   44.15
  -2   1  -5 3431.81   44.98
   2  -1   5 3535.95   45.92
  -2   1  -5 3304.06   43.44
   2  -1   5 3144.29   40.75
  -3   0  -2 1792.61   25.73
  -3   0  -2 1687.01   23.72
   3   0   2 1464.31   21.01
  -3   0  -2 1562.47   23.13
   3   0   2 1855.66   27.13
   3   0   2 1711.82   20.82
   3   0   2 1682.75   23.28
  -3   0   0 3311.13   43.45
  -3   0   0 3256.64   47.17
   3   0   0 3918.47   48.01
  -3   0   0 3976.83   49.16
   3   0   0 4363.62   56.03
   3   0   0 3976.18   48.88
  -3   0   0 4088.35   53.41
  -3   0   0 3658.82   45.02
  -3  -2   1  231.10    8.48
  -3  -2   1  242.09    8.56
  -3  -2   1  198.20    7.35
  -3  -2   1  240.89    8.32
   3   2  -1  257.15   10.37
   3   2  -1  191.68    8.82
   3   2  -1  177.50    7.68
  -3  -2   1  180.32    6.59
  -2  -4   1 2727.39   36.26
   2   4  -1 2392.05   31.13
  -2  -4   1 2591.27   33.13
  -2  -4   1 2300.00   31.35
  -2  -4   1 2064.04   28.63
  -2  -4   1 2465.73   30.72
   2   4  -1 2776.11   37.53
  -2  -4   1 2608.64   32.53
  -1   3  -4  466.54   14.11
   1  -3   4  446.95   13.91
  -1   3  -4  426.29   12.79
   1  -3   4  465.83   13.58
  -1   3  -4  471.50   13.34
  -1   3  -4  460.99   14.65
   1  -3   4  457.57   13.07
   1  -3   4  433.03   13.44
   0   4   2  841.31   21.50
   0  -4  -2  798.82   21.06
   0  -4  -2  857.30   23.26
   0  -4  -2  776.15   20.43
   0  -4  -2  781.32   21.67
   0  -4  -2  728.21   19.87
   0   4   2  641.20   17.46
   0   4   2  905.55   25.12
   0   2  -6   11.36    4.92
   0  -2   6   11.80    6.65
   0   2  -6   14.22   10.93
   0   2  -6    9.43    3.33
   0  -2   6   10.00    4.71
   0  -2   6   10.95    6.75
   0  -2   6   11.70    7.37
   0  -2   6   12.13    5.88
   3   2   3 1500.17   23.49
  -3  -2  -3 1690.76   24.96
  -3  -2  -3 1592.34   23.69
  -3  -2  -3 1526.66   22.50
   3   2   3 1288.99   17.84
   3   2   3 1765.65   22.76
  -3  -2  -3 1621.12   20.73
  -3  -2  -3 1503.08   22.14
  -1  -4  -3 2383.48   32.14
  -1  -4  -3 2032.02   28.05
   1   4   3 2075.54   29.79
   1   4   3 2584.19   35.31
   1   4   3 2049.20   25.28
   1   4   3 2323.12   28.41
  -1  -4  -3 2080.19   29.10
  -1  -2  -6    8.26    3.55
  -1  -2  -6   11.45    4.19
   1   2   6    8.98    5.22
   1   2   6   10.50    4.40
  -1  -2  -6    1.84    5.16
   1   2   6   12.71    7.25
   1   2   6    9.53    5.34
  -1  -2  -6    8.97    5.94
  -2  -4  -2 4570.80   57.21
  -2  -4  -2 4292.44   53.83
   2   4   2 4179.44   52.24
   2   4   2 3491.91   45.88
   2   4   2 4748.41   60.26
  -2   2   2 1306.89   20.46
   2  -2  -2 1476.33   29.75
  -2   2   2 1552.60   25.35
   2  -2  -2 1248.83   18.40
  -2   2   2 1439.80   19.38
  -2   2   2 1304.50   21.28
   2  -2  -2 1481.38   19.94
  -2   2   2 1308.22   19.89
  -1  -3  -5    1.65    3.96
   1   3   5    0.83    4.72
   1   3   5    0.89    1.04
  -1  -3  -5    1.26    2.56
   1   3   5    1.85    2.22
  -1  -3  -5    5.35    4.37
  -1  -3  -5    2.34    4.28
   1   3   5    4.28    5.57
   0  -3   5    2.81    2.88
   0   3  -5    0.45    1.23
   0   3  -5    2.60    2.40
   0  -3   5    4.16    4.92
   0   3  -5    5.45    3.47
   0  -3   5    6.01    6.32
   0   3  -5    8.03    6.11
   0   3  -5    1.81    3.83
   1   4  -3 2866.46   40.69
   1   4  -3 2431.46   32.89
   1   4  -3 2387.28   28.47
  -1  -4   3 2784.17   33.06
  -1  -4   3 2551.13   37.09
   1   4  -3 2785.10   37.34
  -1  -4   3 2653.70   34.79
  -1  -4   3 2863.66   37.88
  -1  -1   6   59.61    4.90
  -1  -1   6   48.58    8.89
   1   1  -6   54.82    6.83
  -1  -1   6   60.18    6.57
   1   1  -6   49.59    8.73
   1   1  -6   34.95    4.81
  -1  -1   6   39.57    4.42
   1   1  -6   57.96    7.10
   1  -3  -3    8.84    5.42
   1  -3  -3    5.65    4.22
   1  -3  -3    3.97    2.52
  -1   3   3   13.73    4.17
  -1   3   3   10.17    6.35
  -1   3   3    8.39    5.83
  -1   3   3   11.11    5.62
   1  -3  -3    9.05    4.18
  -3   0  -3 7288.06  164.34
   1   0  -6   20.40    4.30
   1   0  -6   22.32    2.78
   1   0  -6   23.48    7.02
  -1   0   6   19.01    6.35
   1   0  -6   26.82   14.12
  -1   0   6   26.06   11.75
  -1   0   6   33.17   10.97
  -1   0   6   28.46    6.68
  -2   2  -4  201.57    8.61
  -2   2  -4  198.21    9.39
   2  -2   4  188.98    8.13
   2  -2   4  206.80    6.44
   2  -2   4  211.21    9.06
  -2   2  -4  200.80    8.85
   2  -2   4  215.69   11.61
  -2   2  -4  199.78    7.97
   0   4  -3   25.72    9.51
   0  -4   3   27.27    7.59
   0   4  -3   18.58    6.10
   0  -4   3   24.67    6.82
   0  -4   3   17.53    3.67
   0   4  -3   20.60    4.27
   0  -4   3   23.02    3.94
   0   4  -3   21.66    7.81
   2   1   6    1.40    2.32
   2   1   6    1.89    3.71
  -2  -1  -6    1.79    5.00
  -2  -1  -6    5.47    5.37
   2   1   6    1.61    3.69
  -2  -1  -6   -0.08    3.96
   2   1   6   -1.43    2.93
  -2  -1  -6    0.40    1.60
   3   3   1   64.87    5.99
  -3  -3  -1   47.55    3.97
  -3  -3  -1   59.12    5.86
  -3  -3  -1   58.22    6.26
   3   3   1   49.15    6.48
  -3  -3  -1   60.45    7.37
  -3  -3  -1   48.61    8.65
  -3  -3  -1   49.99    4.41
  -3   0   1 4372.59   52.66
  -3   0   1 4534.53   57.34
   3   0  -1 4169.99   50.26
  -3   0   1 4165.66   51.90
   3   0  -1 4220.70   52.83
  -3   0   1 3600.95   48.10
   3   0  -1 4652.10   60.87
  -3   0   1 3412.56   44.97
   2   0   6  514.95   14.55
  -2   0  -6  501.47   13.63
  -2   0  -6  544.56   15.93
   2   0   6  481.62   14.69
  -2   0  -6  523.96   14.75
   2   0   6  496.02   14.19
  -2   0  -6  545.68   16.59
  -3  -3   0 9044.04  202.18
   3   3   0 9576.18  214.27
  -3  -3   0 6999.22  157.44
  -3  -3   0 9303.26  208.20
  -3  -3   0 7473.18  167.65
   3   3   0 6857.20  153.85
   1   3  -5 1102.67   28.87
  -1  -3   5 1051.75   24.91
   1   3  -5 1004.55   25.56
  -1  -3   5 1095.86   28.12
  -1  -3   5 1106.07   28.78
  -1  -3   5 1112.47   28.60
   1   3  -5  733.73   17.61
  -1  -3   5 1165.83   30.24
   3   1   4  515.59   18.13
  -3  -1  -4  576.42   20.98
  -3  -1  -4  564.85   15.73
   3   1   4  640.10   28.27
  -3  -1  -4  595.00   21.62
   3   1   4  597.80   25.43
  -3  -3  -2   13.91    6.33
  -3  -3  -2   12.15    6.21
  -3  -3  -2    4.50    4.11
  -3  -3  -2   14.73    5.03
  -3  -3  -2    7.65    2.62
   3   3   2    7.37    5.71
  -3  -3  -2   11.09    5.34
   3   3   2   12.32    4.47
   3   1  -2  193.00    7.87
   3   1  -2  239.29   10.49
  -3  -1   2  228.47    9.84
   3   1  -2  228.60    9.58
  -3  -1   2  217.17    9.99
  -3  -1   2  175.34    8.28
  -3  -1   2  211.77    8.03
   3   1  -2  168.94    8.86
  -2  -4   2 4082.93   59.70
   2   4  -2 4537.33   67.92
  -2  -4   2 3990.43   56.72
  -2  -4   2 4117.73   58.39
   2   4  -2 3397.10   50.80
  -2  -4   2 3803.29   56.72
  -2  -4   2 4338.62   65.66
   2   4  -2 3897.47   57.53
   0   2   6  892.07   15.62
   0  -2  -6  930.09   16.86
   0  -2  -6  802.07   52.63
   0  -2  -6  857.11   16.29
   0   2   6  958.49   17.38
   0  -2  -6  896.30   15.82
   0   2   6  929.57   18.37
   2  -1  -4  505.76   19.23
  -2   1   4  505.47   18.50
  -2   1   4  556.46   20.18
   2  -1  -4  551.70   18.32
   2  -1  -4  563.50   18.59
   2  -1  -4  597.55   21.71
   2  -1  -4  547.51   19.62
  -2   1   4  591.77   22.11
  -2  -4  -3  767.98   26.76
   2   4   3  825.04   29.15
  -2  -4  -3  758.84   26.07
   2   4   3  718.64   24.92
   2   4   3  638.56   17.76
  -2  -4  -3  607.47   21.57
   1  -2   6 3427.31   51.19
   1  -2   6 3316.60   51.70
  -1   2  -6 3420.25   52.13
   1  -2   6 3317.64   49.39
  -1   2  -6 3289.87   48.52
   1  -2   6 3214.37   48.68
  -1   2  -6 3524.46   55.25
   3   2  -2   49.89    7.46
  -3  -2   2   43.01    3.46
  -3  -2   2   45.11    5.86
   3   2  -2   33.15    9.06
  -3  -2   2   33.20    3.78
  -3  -2   2   44.83    4.23
  -3  -2   2   39.26    3.76
  -3  -2   2   36.42    3.59
   1  -2  -5  722.77   10.12
  -1   2   5  777.88   17.05
   1  -2  -5  722.36    7.91
  -1   2   5  627.83   13.17
  -1   2   5  688.82   14.64
   1  -2  -5  712.71   14.33
  -1   2   5  674.32    9.19
   1  -2  -5  676.81   13.06
   1   0   7 7708.49  110.78
  -1   0  -7 8435.95  121.60
  -1   0  -7 7673.54  110.53
  -1   0  -7 7504.88  108.01
   2   3   5 5121.57   75.39
  -2  -3  -5 5663.46   80.44
  -2  -3  -5 5530.86   81.68
   2   3   5 5051.69   74.74
  -2  -3  -5 4428.03   64.98
  -2  -3   4  105.08    7.11
   2   3  -4   97.99    8.65
   2   3  -4   83.19    4.40
   2   3  -4  102.81    5.86
  -2  -3   4   73.50    3.18
  -2  -3   4   99.10    6.57
  -2  -3   4   95.18    7.39
  -2  -3   4   89.98   13.89
   0   3   5 3077.20   47.67
   0   3   5 2864.73   43.49
   0  -3  -5 2938.15   43.63
   0   3   5 2796.59   41.50
   0  -3  -5 2764.85   43.90
   3   2   4 1328.12   21.17
  -3  -2  -4 1559.20   24.67
  -3  -2  -4 1585.76   26.39
   3   2   4 1731.45   26.04
  -3  -2  -4 1471.34   24.33
  -3  -2  -4 1358.24   20.86
  -3  -2  -4 1664.06   28.45
   3   2   4 1537.98   26.06
   2   1  -5 2551.43   40.50
  -2  -1   5 3306.35   47.81
   2   1  -5 2911.70   42.14
   2   1  -5 3107.77   47.50
  -2  -1   5 2437.13   36.68
   2   1  -5 3135.13   48.53
  -1  -2   6 1843.12   28.13
   1   2  -6 1348.72   21.74
   1   2  -6 1903.52   31.04
  -1  -2   6 2105.49   34.84
  -1  -2   6 2029.28   32.87
   1   2  -6 2057.49   33.55
  -1  -2   6 2043.36   31.92
   0   0  -7 1146.21   20.31
   0   0   7 1230.21   21.93
   0   0  -7 1154.00   19.77
   0   0   7 1210.60   21.83
   0   0  -7 1248.89   22.06
   0   0   7 1168.20   22.24
   0   4   3   71.17    7.88
   0   4   3   64.39    9.66
   0   4   3   57.84    7.37
   0  -4  -3   54.28    6.42
   0  -4  -3   59.15    6.96
   0  -4  -3   60.71    7.74
   0  -4  -3   67.79    6.59
   0   4   3   62.47    4.35
  -3  -3   1  510.08   18.31
   3   3  -1  668.21   23.79
  -3  -3   1  624.21   21.48
   3   3  -1  468.25   17.10
  -3  -3   1  537.72   18.77
   3   3  -1  661.03   27.25
  -3  -3   1  463.22   16.84
  -3  -3   1  644.38   22.33
   3  -1   1  205.03    7.96
   3  -1   1  194.93    9.36
  -3   1  -1  217.23   12.71
  -3   1  -1  188.20    8.01
   3  -1   1  203.71    9.09
  -3   1  -1  218.97   12.26
   3  -1   1  225.75   15.44
   2   2   6  843.11   17.38
  -2  -2  -6  879.73   15.14
   2   2   6  790.45   26.59
   2   2   6  694.60   14.25
  -2  -2  -6  686.95   23.54
   3   0   4 3827.47   57.41
  -3   0  -4 4087.29   60.63
  -3   0  -4 4259.97   66.24
   3   0   4 4333.43   64.24
   3   0   4 4704.17   71.67
  -1  -1  -7  229.73   10.80
   1   1   7  222.67   11.12
   1   1   7  221.89   13.24
  -1  -1  -7  242.72   14.76
  -1  -1  -7  213.02   15.14
  -1  -1  -7  207.69    9.00
   1   1   7  226.67   10.58
   1   1   7  217.10    9.32
  -3   1  -2 5749.66   84.01
   3  -1   2 6501.48   95.20
   3  -1   2 5078.91   72.07
   3  -1   2 6046.94   88.68
  -3   1  -2 5759.03   85.47
  -3  -3  -3   64.20    3.84
  -3  -3  -3   60.75    4.97
  -3  -3  -3   63.78    4.31
  -3  -3  -3   80.77   15.19
  -3  -3  -3   51.52    3.64
   3   3   3   72.30    5.09
   3   3   3   63.68   11.05
  -3  -3  -3   71.20    9.45
   0  -1   7 4600.24   66.88
   0  -1   7 4956.36   73.62
   0   1  -7 5067.63   75.91
   0  -1   7 5053.89   74.12
   0   1  -7 4653.42   68.68
   0   1  -7 4438.17   65.11
   0   1  -7 4604.47   67.51
  -1   1   6   27.97    4.46
  -1   1   6   34.53   17.01
  -1   1   6   33.36    9.89
   1  -1  -6   31.00    8.15
   1  -1  -6   26.87    6.42
  -1   1   6   26.77    8.90
   1  -1  -6   29.30    7.26
  -1   4  -1 3411.77   51.93
  -1   4  -1 3301.51   50.26
   1  -4   1 3640.19   54.41
   1  -4   1 3247.75   50.58
  -1   4  -1 3643.97   54.91
  -1   4  -1 3502.26   52.53
   1  -4   1 3509.82   52.59
   1  -4   1 3385.69   51.81
  -2   2   3  568.20   23.99
   2  -2  -3  731.88   26.87
  -2   2   3  588.93   22.01
  -2   2   3  620.49   22.92
   2  -2  -3  598.14   22.38
   2  -2  -3  627.14   21.18
   2  -2  -3  651.83   22.49
  -1  -4  -4  103.45    6.86
   1   4   4  109.44   13.07
   1   4   4   97.08    3.64
  -1  -4  -4  102.25    5.87
  -1  -4  -4  100.45    8.18
   1   4   4   96.06    4.30
   1   4   4   95.09    6.05
   1   4   4  115.63    7.96
   1  -4   0 2829.42   43.84
   1  -4   0 2492.55   38.10
  -1   4   0 2571.61   40.30
   1  -4   0 2621.94   41.68
  -1   4   0 2805.79   44.43
  -1   4   0 2625.88   40.47
  -1   4   0 2567.50   39.52
   1  -4   0 2637.80   40.43
   3  -1   0 2699.27   40.14
   3  -1   0 3082.82   48.42
  -3   1   0 2744.32   40.89
   3  -1   0 2510.10   37.30
  -3   1   0 2292.51   34.67
  -3   1   0 2479.64   40.79
   3   0  -2 1546.54   22.38
  -3   0   2 1793.88   25.94
  -3   0   2 1849.48   32.20
  -3   0   2 1454.66   25.58
  -3   0   2 1777.87   28.85
   3   0  -2 1721.01   26.97
   3   0  -2 1913.26   36.46
   2   0  -5  753.59   15.58
   2   0  -5  804.09   11.04
   2   0  -5  836.73   12.60
  -2   0   5  794.94   12.22
  -2   0   5  711.95   13.56
  -2   0   5  853.45   17.59
   2   0  -5  839.88   17.13
   1  -3   5 1655.52   26.24
  -1   3  -5 1686.21   29.44
  -1   3  -5 1700.07   29.19
  -1   3  -5 1654.43   26.25
   1  -3   5 1676.49   30.21
   1  -3   5 1668.33   28.34
  -2   3  -1   93.28    6.35
   2  -3   1  107.49   10.33
   2  -3   1   91.30    5.80
   2  -3   1   85.32    5.39
  -2   3  -1   93.00    8.93
  -2   3  -1   99.87    5.80
  -2   3  -1   93.21    7.49
   2  -3   1  108.90    8.17
  -2  -2   5 2177.52   35.64
  -2  -2   5 2121.88   32.05
   2   2  -5 1891.92   28.67
   2   2  -5 2146.95   32.79
   2   2  -5 2000.54   33.65
  -2  -2   5 1518.55   23.66
   2  -1   6   10.67    4.14
  -2   1  -6    9.79    4.75
   2  -1   6   13.71    4.98
  -2   1  -6    5.16    4.46
  -2   1  -6   12.57    8.00
   2  -1   6    8.10    4.65
   2  -1   6    2.24    5.33
   1   4  -4    4.16    3.96
   1   4  -4    7.18    4.47
   1   4  -4    4.57    5.74
  -1  -4   4   13.41    5.87
  -1  -4   4    8.96    5.07
   0   4  -4  125.18   11.22
   0  -4   4  133.22    5.37
   0  -4   4  127.72    8.12
   0  -4   4  133.36   11.77
   0  -4   4  127.30    7.37
   0   4  -4  147.52    9.39
   0   4  -4  130.55    4.94
  -1   1  -7 4250.57   62.79
  -1   1  -7 4344.55   63.82
   1  -1   7 4792.08   72.02
   1  -1   7 4383.03   64.28
   1  -1   7 4576.07   67.73
   1  -1   7 4411.10   67.53
  -1   1  -7 4740.86   70.96
  -1   4  -2 7581.95  108.76
  -1   4  -2 8009.87  116.11
   1  -4   2 7404.23  109.14
   1  -4   2 7817.36  112.43
  -1   4  -2 7409.38  107.74
   1  -4   2 7001.39  101.52
  -2   3   0  284.84   20.85
   2  -3   0  272.55   13.66
   2  -3   0  318.26   13.27
  -2   3   0  313.50   13.40
   2  -3   0  263.35   10.66
  -2   3   0  297.22   13.28
  -2   3   0  295.39   11.50
   2  -3   0  307.23   12.71
  -2   3  -2 1823.68   29.57
  -2   3  -2 1811.50   29.40
  -2   3  -2 1680.96   27.21
   2  -3   2 1740.60   29.12
   2  -3   2 1673.45   26.65
  -2   3  -2 1736.73   29.33
   2  -3   2 1834.25   30.36
   0   1   7  887.63   16.41
   0   1   7  978.35   17.66
   0  -1  -7 1055.96   18.53
   0   1   7 1046.60   27.53
   0  -1  -7  979.91   18.74
   0   1   7 1043.39   18.32
   0  -1  -7 1012.74   17.97
   0  -1  -7  894.66   16.91
   2  -2   5   94.11    4.70
   2  -2   5   90.03    6.07
  -2   2  -5   95.86    5.60
  -2   2  -5  102.75   12.94
  -2   2  -5   99.01    7.08
   2  -2   5   94.07    7.51
   1  -3  -4  665.01   23.95
  -1   3   4  692.21   17.23
  -1   3   4  642.03    8.81
   1  -3  -4  639.20   22.42
   1  -3  -4  654.78   22.46
  -1   3   4  702.70   12.75
  -3   1  -3 9227.91   29.20
  -2  -4   3 1286.33   23.36
   2   4  -3 1261.73   27.55
   2   4  -3 1104.04   19.70
   2   4  -3 1433.69   25.42
  -2  -4   3 1197.68   17.22
  -2  -4   3 1293.77   18.63
  -2  -4   3 1231.20   21.75
   1  -4  -1 1004.43   20.02
  -1   4   1  935.41   17.44
   1  -4  -1  940.45   20.14
  -1   4   1  923.69   16.81
  -1   4   1  944.56   18.46
   1  -4  -1  950.11   19.75
  -1   4   1 1017.81   19.37
   1  -4  -1  903.01   16.24
  -3  -1  -5  523.03   17.41
   3   1   5  566.70   21.13
  -3  -1  -5  557.70   21.47
   3   1   5  583.98   19.78
  -3  -1  -5  543.09   20.29
   3   1   5  482.83   17.42
   3   3  -2 1834.66   29.70
  -3  -3   2 2089.95   32.87
  -3  -3   2 2376.33   37.67
  -3  -3   2 2101.57   32.07
  -3  -3   2 2427.64   37.67
  -3  -3   2 2345.33   35.26
   3   3  -2 2427.77   36.43
   2   4   4  491.61   19.23
  -2  -4  -4  481.05   18.57
   2   4   4  417.24   25.77
  -2  -4  -4  435.59   16.08
   2   4   4  447.91   16.76
  -3   1   1 2767.31   41.90
   3  -1  -1 2951.34   44.04
   3  -1  -1 3211.69   46.95
  -3   1   1 2815.59   44.80
  -3   1   1 3198.23   46.38
   3  -1  -1 3538.21   54.49
   3   1  -3   20.59    9.43
  -3  -1   3   16.99   10.02
   3   1  -3   17.05    6.28
  -3  -1   3   15.49    3.81
   3   1  -3   18.92    7.65
   1   3   6  139.73    7.49
  -1  -3  -6  145.34    9.74
  -1  -3  -6  135.44    9.71
  -1  -3  -6  136.57    9.13
   1   3   6  139.31   17.85
   1   3   6  138.90    8.13
  -1  -3  -6  117.94    6.17
  -1  -5   0   80.08    4.19
   1   5   0   86.43    6.01
   1   5   0   92.16    8.23
   1   5   0   61.38    6.87
  -1  -5   0   80.34   15.51
  -1  -5   0   58.31    7.00
   0  -3   6   20.35   11.11
   0  -3   6   18.60   11.26
   0  -3   6   18.55    8.32
   0   3  -6   17.45    4.60
   0   3  -6   16.66    2.79
   0   3  -6   18.82    7.50
   0   3  -6   26.01   11.19
  -3  -2   3  223.33   11.69
  -3  -2   3  173.66    7.62
  -3  -2   3  157.64    5.70
   3   2  -3  159.75   12.58
  -3  -2   3  200.27   10.14
   3   2  -3  214.29   11.62
  -3  -2   3  200.43    6.72
  -3  -2   3  201.87    7.71
   2  -3  -1   72.99    9.82
   2  -3  -1   82.62    7.14
   2  -3  -1   77.04   11.73
  -2   3   1   68.60    7.22
  -2   3   1   73.32    5.37
  -2   3   1   80.86   14.40
   2  -3  -1   61.51    5.12
  -2   3  -3 1162.35   20.71
  -2   3  -3 1207.19   22.87
  -2   3  -3 1255.12   21.65
   2  -3   3 1307.53   22.90
   2  -3   3 1231.13   23.32
   2  -3   3 1220.48   20.11
  -2   3  -3 1281.96   21.30
   3   3   4  260.22   10.24
  -3  -3  -4  242.72    9.86
   3   3   4  187.72    7.56
   3   3   4  228.90   11.59
  -3  -3  -4  220.85    8.62
  -3  -3  -4  244.74   14.95
  -3  -3  -4  255.77   12.25
  -1  -5   1 2819.86   44.95
  -1  -5   1 2642.22   39.24
   1   5  -1 3185.79   49.62
  -1  -5   1 2881.96   42.83
   1   5  -1 3036.17   45.57
   1   5   1   79.50   10.31
   1   5   1  114.63   21.06
  -1  -5  -1   91.00    7.93
   1   5   1  102.48    5.25
  -1  -5  -1   78.60    6.79
  -1  -5  -1  107.04    5.17
   1  -4   3  195.08   11.06
  -1   4  -3  206.14    9.32
   1  -4   3  189.21    8.07
   1  -4   3  198.64    8.21
  -1   4  -3  195.70   10.17
  -1   4  -3  194.63    7.62
   1  -4   3  195.83    8.25
  -3  -2  -5 1503.49   26.33
   3   2   5 1491.85   22.86
   3   2   5 1218.60   19.71
  -3  -2  -5 1445.88   23.49
   3   2   5 1393.45   24.73
  -1  -2  -7   63.07    5.40
  -1  -2  -7   59.95    7.12
   1   2   7   64.26   12.82
  -1  -2  -7   57.07    5.48
   1   2   7   62.76    6.13
  -1  -2  -7   67.80    9.59
   1   2   7   59.44    7.51
   0   2  -7  747.53   27.12
   0  -2   7  724.34   30.86
   0  -2   7  686.13   24.33
   0   2  -7  687.71   25.28
   0   2  -7  678.18   24.61
   0  -2   7  739.02   26.47
   0  -2   7  728.48   26.51
   0  -4  -4   82.21    6.96
   0   4   4   95.14    5.63
   0   4   4   92.91    9.40
   0   4   4   98.36    5.40
   0  -4  -4   84.74    5.97
   0  -4  -4   85.70    7.13
   3   0   5  155.32    8.78
  -3   0  -5  145.30    9.45
   3   0   5  130.96    9.28
   3   0   5  137.01   13.83
   3   4   1 1379.12   21.46
   3   4   1 1402.59   24.45
  -3  -4  -1 1726.91   27.69
  -3  -4  -1 1808.23   31.48
  -3  -4  -1 1658.86   25.30
  -3  -4  -1 1865.40   29.43
   3   4   1 1949.41   32.21
   2   1   7  146.44    7.47
   2   1   7  132.63    6.65
  -2  -1  -7  137.40    5.31
   2   1   7  162.63   25.38
  -2  -1  -7  147.01    8.28
  -2  -1  -7  150.58    7.69
  -3  -4   0  439.71   16.29
  -3  -4   0  632.31   23.64
  -3  -4   0  607.80   21.36
  -3  -4   0  504.32   20.56
  -3  -4   0  568.44   19.62
   3   4   0  457.94   16.41
  -3  -4   0  643.17   25.24
   3   4   0  677.59   24.81
  -1   4   2  112.59   11.55
  -1   4   2  102.91    6.92
   1  -4  -2  103.05    5.58
   1  -4  -2  114.84    8.22
  -1   4   2  109.03    5.92
   1  -4  -2  111.53   20.35
  -3   1  -4  226.04   18.61
  -3   1  -4  213.63    7.75
   3  -1   4  240.78   13.25
  -3   1  -4  220.35   10.22
   3  -1   4  250.04   12.01
   3  -1   4  186.35    6.64
   2   0   7   81.68   17.49
  -2   0  -7   78.68   19.42
   2   0   7   68.02    9.19
   2   0   7   65.16    5.95
  -2   0  -7   66.23    9.54
  -2   0  -7   78.05    6.70
  -1  -3   6 4332.21   64.35
   1   3  -6 4558.38   68.59
  -1  -3   6 4703.58   70.74
   1   3  -6 4017.93   59.97
   1   3  -6 2779.78   40.15
  -1  -3   6 4192.50   59.80
  -3   0   3   84.51    8.50
   3   0  -3   64.42    7.02
   3   0  -3   75.11   11.22
   3   0  -3   85.00   14.80
  -3   0   3   91.20    5.68
   1   1  -7  197.84    8.99
  -1  -1   7  206.11    6.40
  -1  -1   7  210.98   11.23
   1   1  -7  199.92   10.35
   1   1  -7  148.65    8.49
  -1  -1   7  164.16    6.77
  -3  -4  -2    5.77    4.34
  -3  -4  -2    9.47    5.75
  -3  -4  -2    5.43    3.74
  -3  -4  -2    4.75    2.73
  -3  -4  -2    7.87    4.20
   3   4   2    7.54    5.53
   3   4   2    3.00    4.81
   2  -1  -5 3941.34   61.99
  -2   1   5 4134.85   64.82
   2  -1  -5 3527.82   57.25
   2  -1  -5 3240.18   46.28
   2  -1  -5 4071.24   57.96
  -2  -3  -6 1031.87   17.89
   2   3   6 1135.22   21.46
   2   3   6 1235.72   18.95
  -2  -3  -6 1380.28   21.25
   2   3   6 1254.96   23.29
  -2  -3  -6 1341.58   24.37
   1   5  -2 4366.48   62.49
   1   5  -2 6086.08   88.56
  -1  -5   2 5768.11   85.37
   1   5  -2 6796.80  100.16
  -1  -5   2 5942.54   85.81
  -2  -3   5 1664.89   28.83
   2   3  -5 1632.31   24.21
   2   3  -5 1393.31   22.52
   2   3  -5 1544.09   26.88
  -2  -3   5 1569.16   25.84
  -1  -5  -2 2820.77   41.49
  -1  -5  -2 2606.48   41.81
   1   5   2 3024.88   43.93
   1   5   2 3254.90   50.57
  -1  -5  -2 2369.85   37.08
  -1   0   7   40.57    4.05
   1   0  -7   37.64    3.89
  -1   0   7   47.28   11.06
  -1   0   7   27.04    7.28
   1   0  -7   32.05    6.63
   1   0  -7   38.96    6.02
  -2  -5   0  697.40   11.90
   2   5   0  763.16   26.02
   2   5   0  877.09   31.24
  -2  -5   0  680.94   10.46
  -2  -5   0  794.69   26.60
   2   5   0  745.21   25.10
   2  -2  -4  366.70   13.27
  -2   2   4  360.02   22.25
   2  -2  -4  348.04   12.22
   2  -2  -4  408.39   16.64
   2   5   1   24.34    6.14
  -2  -5  -1   22.66    7.41
   2   5   1   40.65   16.39
  -2  -5  -1   29.37    4.05
   2   5   1   21.87    4.82
  -2  -5  -1   29.30   11.45
   1   4   5  387.45   15.75
   1   4   5  354.31   12.91
   1   4   5  345.70   12.04
  -1  -4  -5  382.99   23.91
   1   4   5  354.90   17.63
  -3   1   2 2975.91   47.74
  -3   1   2 3494.35   50.32
   3  -1  -2 3951.14   60.74
   3  -1  -2 3355.73   50.07
  -3   1   2 3255.57   49.53
   3  -1  -2 3603.89   51.44
   0   5   0  118.96   13.81
   0  -5   0  109.10    5.25
   0  -5   0  107.36    7.28
   0   5   0   92.01    5.45
   0   5   0  114.27    7.01
   0  -5   0  113.49    9.37
   3   4  -1  863.73   16.95
  -3  -4   1 1162.29   20.04
   3   4  -1 1195.43   22.04
  -3  -4   1 1059.23   17.87
  -3  -4   1  973.14   17.72
  -3  -4   1 1121.93   18.51
  -3  -4   1 1141.31   18.72
   1  -2   7 2434.03   39.20
  -1   2  -7 2373.60   36.37
  -1   2  -7 2460.91   39.60
   1  -2   7 2364.76   36.44
  -1   2  -7 2393.17   37.73
   1  -2   7 2437.78   38.39
   2  -3  -2  829.50   16.19
   2  -3  -2  682.00   10.39
  -2   3   2  808.57   14.37
  -2   3   2  776.94   17.79
   2  -3  -2  906.76   18.56
  -2   3   2  750.09   16.77
   0  -5   1  206.26    8.93
   0   5  -1  226.67   16.40
   0   5  -1  243.05   12.62
   0  -5   1  200.43   10.58
   0  -5   1  238.13   10.41
   0   5  -1  174.28    8.00
   0   3   6  611.33   22.00
   0  -3  -6  529.29   31.74
   0  -3  -6  608.83   22.60
   0  -3  -6  627.84   22.55
   0   3   6  592.81   20.60
   0   3   6  639.80   23.79
   0   4  -5  236.82    8.88
   0  -4   5  245.12   12.89
   0   4  -5  235.41   14.81
   0   4  -5  243.10   17.14
   0  -4   5  245.04   11.60
  -1   2   6  554.07   19.42
   1  -2  -6  535.99   21.04
   1  -2  -6  587.50   20.14
  -1   2   6  533.94   19.41
  -1   2   6  609.60   23.22
   1  -2  -6  567.42   20.65
  -2   3  -4  328.37   13.47
   2  -3   4  304.34   13.24
  -2   3  -4  316.90   14.29
  -2   3  -4  323.09   12.72
   2  -3   4  318.68   12.15
   2  -3   4  324.05   13.77
   0  -2  -7  245.14   14.01
   0  -2  -7  249.36   11.07
   0   2   7  229.43    9.84
   0   2   7  247.23   11.88
   0  -2  -7  215.12   13.38
   0   2   7  252.80   11.59
  -3  -3   3  139.38    5.43
  -3  -3   3  185.90    7.64
   3   3  -3  158.94    8.32
  -3  -3   3  201.58    8.15
  -3  -3   3  187.46    7.00
   3   3  -3  211.05    7.33
  -3  -3   3  205.94    7.26
  -3  -3   3  200.24    8.56
   1   4  -5 1967.15   33.81
   1   4  -5 1900.58   32.23
  -1  -4   5 1790.02   29.56
   2   5  -1 1652.66   26.07
   2   5  -1 1883.68   31.73
  -2  -5   1 1560.50   33.96
   2   5  -1 1682.40   25.31
  -2  -5   1 1380.32   21.95
  -2  -5   1 1729.37   26.72
  -2  -4   4  115.27    7.34
  -2  -4   4  118.50   11.89
   2   4  -4  115.01   10.43
   2   4  -4  104.32   11.44
   2   4  -4  131.68   10.46
  -1   3  -6 5574.51   85.78
   1  -3   6 5337.29   77.97
   1  -3   6 5466.62   81.14
   1  -3   6 5421.26   78.78
  -1   3  -6 5262.38   76.26
  -1   3  -6 5424.72   79.38
   2   1  -6  186.65    5.68
   2   1  -6  194.56    9.86
  -2  -1   6  136.28   12.19
  -2  -1   6  207.48    8.97
   2   1  -6  179.07   11.14
  -2  -1   6  208.99   14.69
   1  -4   4  138.79   10.07
   1  -4   4  128.17    6.50
  -1   4  -4  152.72   13.87
  -1   4  -4  145.20    8.73
  -1   4  -4  139.23    6.08
   1  -4   4  138.37    6.96
  -2  -2  -7  346.81   15.99
   2   2   7  320.42   13.89
  -2  -2  -7  341.39   14.45
  -2  -2  -7  279.26   11.53
   2   2   7  309.69   12.19
   2   2   7  284.47   12.57
   0   5   1   85.71    8.22
   0   5   1  111.35   19.00
   0  -5  -1   90.62   14.73
   0   5   1   71.15    6.16
   0  -5  -1   84.69    4.59
   0  -5  -1   94.36   16.10
   3   4   3  613.69   23.09
  -3  -4  -3  745.33   26.24
   3   4   3  728.90   25.49
  -3  -4  -3  656.30   21.71
   3   4   3  800.70   28.55
  -3  -4  -3  707.31   23.45
  -3  -4  -3  749.01   25.72
   2   5   2 4315.15   63.57
  -2  -5  -2 4334.64   64.21
   2   5   2 4989.79   74.51
  -2  -5  -2 3863.25   59.53
   2   5   2 3908.82   55.37
  -2   2  -6  239.25   11.05
   2  -2   6  236.88   10.54
   2  -2   6  252.34   12.10
   2  -2   6  243.29   10.14
   2  -2   6  235.79    9.89
  -2   2  -6  249.59   12.33
   2   4   5 2671.30   42.19
  -2  -4  -5 2358.50   36.73
   2   4   5 2391.14   38.99
  -2  -4  -5 2706.87   47.37
   0   5  -2  751.97   27.57
   0  -5   2  688.39   23.93
   0  -5   2  712.14   26.48
   0   5  -2  780.90   28.01
   0  -5   2  746.64   25.65
   0   5  -2  638.90   22.05
   1   2  -7 1830.89   29.86
  -1  -2   7 2032.80   33.65
   1   2  -7 1987.47   33.45
  -1  -2   7 1993.29   31.76
   1   2  -7 1289.78   20.64
  -3   2  -1  437.38   16.62
   3  -2   1  347.73   15.55
   3  -2   1  462.39   17.76
  -3   2  -1  416.41   15.25
  -3   2  -1  348.89   16.49
   3  -2   1  494.28   20.58
   3   3   5  429.08   15.41
   3   3   5  556.76   19.71
  -3  -3  -5  431.29   15.25
   3   3   5  514.55   19.57
  -3  -3  -5  535.20   23.78
  -3  -3  -5  539.64   18.72
   1   0   8  510.03   19.78
   1   0   8  508.38   19.02
   1   0   8  543.68   20.84
   1   0   8  518.11   20.33
  -1   0  -8  499.15   18.03
  -1   0  -8  564.08   21.24
  -1   0  -8  528.97   20.77
   3   1   6 1669.63   24.86
  -3  -1  -6 2075.43   34.66
  -3  -1  -6 1979.90   31.23
   3   1   6 1999.90   33.59
   3   1   6 1768.66   31.10
  -3  -1  -6 1835.25   27.21
  -3   2  -2 1794.87   28.88
   3  -2   2 1843.11   30.53
   3  -2   2 1386.52   21.59
  -3   2  -2 1849.59   28.51
  -3   2  -2 1770.67   30.50
   3  -2   2 2010.10   33.76
  -2   1  -7  442.60   23.31
  -2   1  -7  441.61   18.83
   2  -1   7  423.35   15.52
  -2   1  -7  440.64   17.92
   2  -1   7  434.81   15.66
   2  -1   7  438.76   17.63
   1  -3  -5 2414.64   39.57
   1  -3  -5 2237.28   36.48
  -1   3   5 2396.88   37.11
  -1   3   5 2561.15   41.84
   1  -3  -5 2329.39   38.14
   1  -3  -5 2421.75   36.75
  -3  -1   4  496.92   19.03
   3   1  -4  397.92   15.77
   3   1  -4  535.71   20.91
  -3  -1   4  476.29   17.49
   2   2  -6  444.85   17.81
  -2  -2   6  309.14   11.44
   2   2  -6  419.90   14.98
  -2  -2   6  484.13   17.34
   2   2  -6  449.13   15.91
  -2  -2   6  498.26   20.40
  -2   0   6  333.99   13.11
  -2   0   6  356.54   15.37
   2   0  -6  334.31   12.11
   2   0  -6  306.10   13.53
   2   0  -6  315.07   14.72
  -2   0   6  251.39   10.80
  -1  -5   3  672.82   25.21
   1   5  -3  473.58   16.43
  -1  -5   3  701.05   23.20
   1   5  -3  763.21   28.33
   1   5  -3  703.29   25.77
  -1  -5   3  683.48   25.04
   1   5   3 8765.59   40.29
  -1  -5  -3 6518.68   95.79
  -1  -5  -3 7053.71  104.07
   1  -4  -3 2739.45   43.69
   1  -4  -3 2848.52   45.72
  -1   4   3 2739.41   43.36
  -1   4   3 2894.08   45.84
  -1   4   3 2786.70   42.45
   1  -4  -3 2799.64   43.55
  -3   2   0    3.15    3.55
   3  -2   0    7.94    6.28
   3  -2   0    8.45    6.00
  -3   2   0    9.22    5.39
  -3   2   0    5.57    4.13
   3  -2   0    3.30    4.33
   0   0   8 3525.31   54.30
   0   0  -8 3615.71   55.11
   0   0  -8 3088.75   47.63
   0   0  -8 3388.63   50.92
   0   0   8 3628.83   54.62
   3   2  -4  360.06   15.77
   3   2  -4  441.29   16.30
  -3  -2   4  299.49   10.92
  -3  -2   4  429.89   15.15
  -3  -2   4  412.64   15.41
  -3  -2   4  427.11   16.73
  -1   1   7  583.99   20.53
   1  -1  -7  453.02   17.51
  -1   1   7  599.86   23.24
   1  -1  -7  545.64   20.92
   1  -1  -7  564.93   19.84
  -3   1  -5  496.99   19.80
   3  -1   5  492.65   16.27
   3  -1   5  542.52   21.02
   3  -1   5  512.63   17.04
   3  -1   5  503.74   19.38
  -1  -1  -8 1291.20   23.90
  -1  -1  -8 1490.26   25.15
   1   1   8 1304.36   21.93
  -1  -1  -8 1373.36   28.06
   1   1   8 1408.53   30.14
   1   1   8 1326.31   24.59
  -3  -4   2  457.07   16.51
  -3  -4   2  638.97   22.73
   3   4  -2  681.45   25.39
  -3  -4   2  641.14   21.75
  -3  -4   2  573.53   20.28
  -3  -4   2  565.81   20.57
   3   4  -2  501.91   18.74
  -2  -5   2 1369.72   20.50
   2   5  -2 2185.49   37.59
  -2  -5   2 1838.57   31.19
   2   5  -2 1890.09   30.28
  -2  -5   2 1955.51   30.32
  -3  -2  -6  152.65    9.58
   3   2   6  151.73   10.30
  -3  -2  -6  121.35    8.54
   3   2   6  129.41    5.79
  -3  -2  -6  147.79    6.29
   3   2   6  147.00    7.74
   0   1  -8   95.20    6.57
   0  -1   8  108.02    6.63
   0   1  -8  101.06   12.34
   0  -1   8  100.11    8.42
   0  -1   8   95.15    5.09
   0   1  -8  107.62   12.83
   0   5   2   77.25    8.49
   0   5   2   66.02    9.55
   0   5   2   54.84   12.29
   0  -5  -2   71.51    7.45
   0  -5  -2   68.35   15.06
   0  -5  -2   62.74    3.73
   3  -2   3 9627.14   39.30
   3  -2   3 9107.32   35.20
  -3   0  -6 1841.89   31.78
   3   0   6 1841.38   91.52
   3   0   6 1521.67   22.62
   3   0   6 1707.19   24.88
  -3   0  -6 1731.41   31.43
  -1   1  -8 7213.73  106.18
  -1   1  -8 6915.72  100.35
   1  -1   8 7353.88  106.95
  -1   1  -8 7666.77  113.38
   1  -1   8 6998.91  101.67
   1  -1   8 7411.76  108.23
  -2  -5  -3 2395.24   37.98
   2   5   3 2683.05   47.66
   2   5   3 2346.85   37.52
   2   5   3 1999.99   34.64
   0  -4  -5  117.31   10.11
   0   4   5  128.93   11.34
   0   4   5  121.77    6.13
   0   4   5  111.02    5.83
   0   4   5  117.20   11.67
   0  -4  -5  124.34   11.02
   0   5  -3  170.68   20.32
   0  -5   3  173.69    7.59
   0   5  -3  185.02   10.70
   0   5  -3  163.14    6.10
   0  -5   3  190.57    9.54
   0  -5   3  158.65    9.14
   3  -1  -3    0.44    4.74
  -3   1   3    2.29    6.44
   3  -1  -3    0.63    0.91
   3  -1  -3    1.06    4.08
  -3   1   3   -1.45    4.43
   2  -3  -3   13.48    4.88
   2  -3  -3   15.11    6.21
  -2   3   3   12.77    6.84
  -2   3   3   17.66    5.65
  -3  -4  -4  280.03   12.02
   3   4   4  251.97   15.61
  -3  -4  -4  230.19    8.06
   3   4   4  301.01   12.88
  -3  -4  -4  266.43   10.60
  -3  -4  -4  287.51    9.80
   3   0  -4  307.92   25.24
   3   0  -4  438.23   18.24
  -3   0   4  416.18   22.04
   0   3  -7    9.12    3.86
   0   3  -7   10.73    3.99
   0   3  -7   10.15    7.10
   0  -3   7   12.17    7.28
   0  -3   7    8.01    6.63
   1   3   7  213.14   15.39
   1   3   7  207.41    8.80
  -1  -3  -7  215.07   13.29
  -1  -3  -7  189.44   10.85
   1   3   7  217.32   13.38
   3  -2  -1 5111.06   77.35
  -3   2   1 4271.28   63.13
   3  -2  -1 4167.83   61.31
  -3   2   1 4414.01   67.28
  -3   2   1 4841.45   69.77
   3  -2  -1 5065.01   73.07
   0  -1  -8 1817.86   32.08
   0   1   8 2182.38   51.38
   0  -1  -8 2098.75   33.25
   0   1   8 2162.78   35.95
   0  -1  -8 2178.49   39.99
  -2   3  -5    5.15    4.75
   2  -3   5    6.33    6.42
  -2   3  -5    2.97    5.22
   2  -3   5    6.75    5.54
  -2   3  -5    4.41    3.66
   2  -3   5    6.50    3.02
   4   2   1 2133.44   35.89
  -4  -2  -1 1889.90   29.78
  -4  -2  -1 2035.36   31.08
  -4  -2  -1 2069.29   31.09
  -4  -2  -1 1493.04   25.34
  -4  -2  -1 1708.81   29.04
   4   2   1 1728.04   28.02
  -4  -2  -2   73.39    7.13
  -4  -2  -2   96.46    8.22
  -4  -2  -2  105.25    4.46
  -4  -2  -2   99.22    7.04
   4   2   2  101.67   12.73
  -4  -2  -2   92.32    6.48
   4   2   2  114.10   13.44
  -4  -1  -1  298.75   12.87
  -4  -1  -1  331.59   11.97
  -4  -1  -1  303.99   11.75
   4   1   1  296.20   12.67
  -4  -1  -1  298.94   11.17
   4   1   1  340.26   20.29
  -4  -1  -2   80.90    4.72
   4   1   2   86.71   10.80
  -4  -1  -2   80.31    5.85
  -4  -1  -2   88.09    8.44
   4   1   2   81.18   13.01
  -4  -1  -2   89.44    5.14
  -1   4  -5 2364.05   37.85
  -1   4  -5 2295.01   40.78
   1  -4   5 2301.09   36.71
   1  -4   5 2305.54   35.50
  -1   4  -5 2267.55   34.60
   3   3  -4   33.62    5.04
   3   3  -4   29.87    7.49
  -3  -3   4   45.92   13.11
  -3  -3   4   34.23    3.47
  -3  -3   4   37.96    7.65
  -4  -2   0 3125.67   46.22
  -4  -2   0 3028.90   45.77
  -4  -2   0 2868.44   42.50
   4   2   0 3164.58   49.52
   4   2   0 2443.11   37.53
  -4  -2   0 2410.51   38.55
  -3   2  -4 1057.27   18.18
  -3   2  -4  917.84   19.06
   3  -2   4  956.45   15.21
   3  -2   4 1056.77   21.10
   3  -2   4 1102.70   21.36
   2  -2  -5 3280.26   47.53
  -2   2   5 3634.15   56.20
   2  -2  -5 3412.09   49.31
   2  -2  -5 3724.25   57.59
   2  -2  -5 3468.91   54.29
   2   5  -3  782.23   28.60
  -2  -5   3  804.07   29.41
  -2  -5   3  738.72   26.95
   2   5  -3  764.75   27.47
  -2  -5   3  780.81   25.15
  -4  -1   0 2142.10   32.30
  -4  -1   0 2048.39   32.65
   4   1   0 1867.25   29.17
  -4  -1   0 2083.04   31.92
   4   1   0 2245.36   43.02
  -4  -1   0 1751.59   29.44
  -1  -4  -6  184.27    9.94
   1   4   6  200.04    7.87
  -1  -4  -6  193.87   11.55
   1   4   6  200.71   10.93
   1   4   6  197.76   13.23
  -2  -3  -7   27.37    4.71
   2   3   7   19.98    6.55
  -2  -3  -7   26.74    8.79
  -2  -3  -7   20.17    3.63
   2   3   7   24.15    7.73
   2   3   7   14.25    6.03
   1   5  -4 1251.52   23.99
   1   5  -4 1218.20   23.93
  -1  -5   4 1272.47   18.45
  -1  -5   4 1240.17   23.28
   1   5  -4  915.98   13.44
   0  -4   6   20.49    6.50
   0   4  -6   18.94    6.36
   0   4  -6   22.19    9.23
   0   4  -6   28.18   11.31
   0   4  -6   16.11    7.53
  -2  -3   6 1387.28   23.32
   2   3  -6 1302.42   24.59
  -2  -3   6 1391.61   25.68
   2   3  -6 1221.64   20.37
  -2  -3   6 1100.34   17.92
   2   3  -6 1387.88   22.09
   1   5   4  198.66    7.60
  -1  -5  -4  181.66   10.10
   1   5   4  182.81    6.93
  -1  -5  -4  181.36   11.84
   1   5   4  199.65   12.10
   4   2   3  365.80   14.16
  -4  -2  -3  513.50   17.44
   4   2   3  463.74   18.62
   4   2   3  523.36   20.83
  -4  -2  -3  450.55   16.81
  -4  -2  -3  466.02   17.11
  -2  -4   5  619.59   22.05
   2   4  -5  613.35   22.57
   2   4  -5  552.38   21.56
  -2   1   6 3880.01   60.58
   2  -1  -6 3494.09   54.30
   2  -1  -6 3902.18   55.98
  -2   1   6 3206.83   46.18
   2  -1  -6 3568.55   55.36
   1   2   8 2497.46   40.97
  -1  -2  -8 2496.44   41.00
   1   2   8 2715.01   43.10
  -1  -2  -8 2804.53   42.80
  -2  -1  -8 1823.62   29.85
   2   1   8 1594.34   25.94
  -2  -1  -8 1574.47   25.19
  -2  -1  -8 1783.65   31.04
   2   1   8 1607.66   28.31
  -4  -1  -3   62.51    4.69
   4   1   3   67.64    9.51
  -4  -1  -3   79.15    3.36
  -4  -1  -3   60.35    5.23
   4   1   3   68.27   12.24
   0   5   3  117.08    9.42
   0  -5  -3  108.58    8.21
   0  -5  -3  111.20   21.62
   0   5   3  131.40    8.25
   0  -2   8  315.48   17.33
   0   2  -8  303.46   15.73
   0  -2   8  313.92   13.69
   0   2  -8  284.42   12.20
   0  -2   8  285.72   10.96
   3   4  -3 1132.91   21.19
  -3  -4   3 1314.80   21.25
   3   4  -3 1411.31   26.72
  -3  -4   3 1270.07   21.94
   3   4  -3 1367.01   21.76
  -3  -4   3 1223.69   25.17
  -2   0  -8  385.02   15.89
   2   0   8  350.68   15.50
  -2   0  -8  353.61   14.24
   2   0   8  355.52   14.25
  -2   0  -8  376.77   16.40
  -1  -3   7 1737.59   31.24
  -1  -3   7 1647.62   24.99
   1   3  -7 1119.01   17.48
   1   3  -7 1594.54   26.41
   1   3  -7 1751.22   30.50
  -1  -3   7 1626.09   28.57
  -2   4  -1    4.75    3.98
   2  -4   1    4.37    5.84
   2  -4   1    6.27    4.48
  -2   4  -1    6.19    4.03
   2  -4   1    7.08    4.60
   1   4  -6 5239.79   73.82
   1   4  -6 5236.91   79.37
  -1  -4   6 5149.48   77.23
   1   4  -6 5102.79   80.22
   3   3   6 1019.03   17.93
  -3  -3  -6 1089.64   17.75
   3   3   6  890.57   14.81
  -3  -3  -6  800.72   15.48
   3   3   6 1002.14   20.51
  -3  -3  -6  995.37   24.93
   1  -4  -4  571.48   20.30
   1  -4  -4  560.53   20.95
  -1   4   4  510.98   20.11
   1  -4  -4  525.30   19.90
  -1   4   4  554.77   20.60
  -1   4   4  576.86   21.49
   2   5   4  171.05    9.59
  -2  -5  -4  142.36    8.40
   2   5   4  139.55    9.97
   4   3   1 3472.86   54.30
  -4  -3  -1 2924.86   44.51
   4   3   1 2578.62   41.85
  -4  -3  -1 3388.18   50.31
   4   3   1 3536.22   52.73
  -4  -3  -1 2659.67   43.26
   2   4   6 3276.37   51.19
   2   4   6 3467.64   53.72
   2   4   6 3588.06   51.08
  -2  -4  -6 3347.18   47.77
  -2  -4  -6 3598.01   56.21
   3   5   1  878.89   14.39
  -3  -5  -1 1130.56   17.83
   3   5   1 1227.43   23.40
  -3  -5  -1  908.36   18.31
  -3  -5  -1 1145.15   19.96
  -2   4  -2  794.82   13.22
   2  -4   2  838.72   18.78
   2  -4   2  828.76   15.00
  -2   4  -2  908.27   17.62
   2  -4   2  895.04   13.55
   0   5  -4   22.28    7.18
   0   5  -4   28.27   13.31
   0   5  -4   25.71    5.97
   0  -5   4   22.71    8.27
   0  -5   4   26.01    6.26
   3  -1   6  629.67   23.63
   3  -1   6  694.38   25.12
   3  -1   6  675.45   22.46
   3  -1   6  683.24   22.79
  -3   1  -6  672.79   24.45
   4   3   2 1107.45   19.33
  -4  -3  -2 1090.01   19.03
  -4  -3  -2  916.74   19.59
  -4  -3  -2  933.59   17.13
   4   3   2  861.31   17.79
   2  -4   0   94.25   11.08
  -2   4   0   95.22   11.84
   2  -4   0   98.13    7.54
  -2   4   0   93.95    6.88
  -2   4   0   82.26    7.93
   2  -4   0   81.14    7.02
   1  -3   7 1259.79   24.01
   1  -3   7 1216.81   21.23
  -1   3  -7 1228.66   21.54
  -1   3  -7 1186.55   20.26
  -1   3  -7 1240.59   23.26
   1  -3   7 1202.18   23.01
  -3   2   2 3497.69   54.94
   3  -2  -2 3547.18   53.91
   3  -2  -2 4422.65   68.00
  -3   2   2 3922.50   57.14
   3  -2  -2 4123.83   59.77
  -3   2   2 3505.81   53.09
  -2   2  -7  226.27   12.77
  -2   2  -7  198.46   17.15
   2  -2   7  209.58    7.41
   2  -2   7  219.89   10.08
   2  -2   7  168.33   10.92
  -3  -5   0  290.22   13.11
   3   5   0  269.61   12.47
  -3  -5   0  361.18   14.53
  -3  -5   0  352.37   13.38
   3   5   0  384.51   16.87
  -3  -5   0  347.63   14.29
  -4  -2   1   19.06    6.68
  -4  -2   1   18.12    9.03
   4   2  -1   22.98    9.66
  -4  -2   1   20.61    5.34
   4   2  -1   14.91    6.64
  -4  -2   1   23.26   10.61
   0   3   7  136.52    6.58
   0  -3  -7  124.03    9.24
   0  -3  -7  150.98    7.28
   0   3   7  134.80    7.11
   0  -3  -7  139.40    6.66
   0   3   7  138.47    8.80
  -1  -1   8  374.85   16.58
  -1  -1   8  297.95   13.37
   1   1  -8  338.47   14.36
   1   1  -8  366.44   15.96
   1   1  -8  271.54   15.89
  -1  -1   8  387.27   14.94
   4   3   0 2477.97   38.75
  -4  -3   0 3279.33   49.66
   4   3   0 3417.89   53.20
  -4  -3   0 3232.00   49.13
  -4  -3   0 2757.83   41.54
  -4  -3   0 2605.18   39.93
  -4  -3   0 3276.67   49.64
   4   0   1    6.66    7.57
   4   0   1    8.73    3.83
  -4   0  -1    7.44    2.85
  -4   0  -1   -0.49    5.82
   4   0   1    6.32    2.11
  -4   0  -1    5.41    2.68
  -1   5  -1 3603.09   54.79
  -1   5  -1 3889.87   59.17
   1  -5   1 3840.49   58.10
   1  -5   1 3569.67   55.56
  -1   5  -1 3635.50   56.30
   3   1   7 2131.39   35.14
   3   1   7 1958.90   33.43
  -3  -1  -7 2264.84   35.69
   3   1   7 1786.46   27.09
  -3  -1  -7 2037.31   30.61
  -3  -1  -7 2289.65   38.79
  -4   0  -2  487.27   16.80
   4   0   2  670.49   24.89
   4   0   2  632.51   23.03
  -4   0  -2  573.19   23.57
  -4   0  -2  612.46   22.12
   4   0   2  636.72   20.98
  -1   2  -8 1754.09   26.52
   1  -2   8 1748.42   29.03
  -1   2  -8 1798.20   35.36
   1  -2   8 1583.02   39.20
   1  -2   8 1695.37   14.53
  -1   2  -8 1660.17   26.80
  -4  -1   1  440.87   17.50
   4   1  -1  607.18   23.96
  -4  -1   1  552.53   18.88
   4   1  -1  469.03   16.84
  -4  -1   1  537.21   19.07
   4   1  -1  543.57   19.56
  -3  -5  -2    6.25    5.29
   3   5   2    5.73    4.94
   3   5   2   11.85    9.24
  -3  -5  -2    3.89    3.19
   3   5   2    9.66    3.33
   3   5   2    7.69    6.34
  -3  -1   5  507.17   19.58
  -3  -1   5  471.43   18.04
   3   1  -5  525.39   20.24
   3   1  -5  417.25   17.66
   1  -5   0 1510.30   16.62
  -1   5   0 1520.37   17.23
  -1   5   0 1624.80   17.50
   1  -5   0 1600.46   15.55
   1  -2  -7   59.68   11.22
  -1   2   7   71.14    6.96
   1  -2  -7   71.07    7.47
  -1   2   7   73.45   12.86
   1  -2  -7   71.36    5.10
  -3  -4  -5   29.87    3.56
   3   4   5   48.76   16.70
  -3  -4  -5   34.91    3.56
   3   4   5   30.03   17.56
  -3  -4  -5   43.07   18.82
   1   0  -8 1434.25   23.43
   1   0  -8 1820.78   28.25
   1   0  -8 1771.20   25.37
  -1   0   8 1941.74   29.32
  -1   0   8 1930.18   30.86
  -3  -2   5   20.58    3.94
   3   2  -5   10.81    8.30
   3   2  -5   17.86    3.32
  -3  -2   5   25.26    5.67
   3   2  -5   27.77   11.30
  -3  -2   5   22.95    6.25
   1  -3  -6  580.56   20.34
  -1   3   6  616.95   13.46
  -1   3   6  566.83   20.23
   1  -3  -6  556.19   21.98
   1  -3  -6  593.30   19.39
  -1   3   6  569.55   20.76
  -4  -2  -4 1876.34   27.28
   4   2   4 1557.53   23.53
  -4  -2  -4 2020.48   31.28
   4   2   4 1826.50   28.32
   4   2   4 2152.18   27.75
  -4  -2  -4 1767.29   23.05
  -4  -1  -4  166.87   19.39
   4   1   4  158.42   11.11
   4   1   4  178.83   15.56
   1  -5   2  802.31   22.92
   1  -5   2  988.27   25.15
  -1   5  -2  914.30   23.33
  -1   5  -2  992.80   26.44
  -1   5  -2  930.12   25.81
  -2  -2  -8 1178.78   28.84
   2   2   8 1360.91   34.97
  -2  -2  -8 1361.71   34.68
  -2  -2  -8 1442.92   34.43
   2   2   8 1248.05   30.16
   2   2   8 1167.73   29.38
  -4  -3  -3  224.01    9.53
   4   3   3  224.90   10.19
  -4  -3  -3  196.83    9.10
  -4  -3  -3  159.96    7.89
  -4  -3  -3  232.76   12.70
   4   3   3  178.63   17.80
  -3  -5   1  158.40   15.01
  -3  -5   1  166.06    7.91
   3   5  -1  193.30   14.38
  -3  -5   1  178.29    9.07
  -3  -5   1  169.97    9.44
   3   5  -1  141.64    7.50
  -2  -1   7 1154.04   27.63
   2   1  -7 1039.72   25.11
   2   1  -7  988.11   29.47
   2   1  -7 1066.83   30.74
  -2  -1   7  788.68   19.98
  -2  -1   7 1135.04   29.73
   2  -4   3 1047.09   27.52
   2  -4   3 1048.79   25.87
  -2   4  -3 1006.28   27.44
  -2   4  -3 1108.36   27.92
   2  -4   3 1141.96   32.96
   4   0   0    8.44    5.02
  -4   0   0    6.82    4.46
  -4   0   0    5.05    4.28
   4   0   0   11.64    4.90
   4   0   0   10.76    3.70
  -4   0   0    9.16    8.79
   2  -3  -4  334.21   12.42
   2  -3  -4  314.77   11.99
  -2   3   4  321.53   19.54
   2  -3  -4  378.25   28.73
  -2   3   4  326.66   16.40
   0  -2  -8 3485.54   47.08
   0  -2  -8 3584.41   49.97
   0  -2  -8 3008.91   45.08
   0   2   8 3496.86   52.61
   0   2   8 3559.06   48.09
  -2   4   1  132.67    8.17
   2  -4  -1  124.90    9.62
  -2   4   1  120.03    9.55
  -2   4   1  107.78    7.35
   2  -4  -1  121.93   14.00
  -4   0  -3  495.15   18.78
   4   0   3  526.34   20.55
   4   0   3  510.07   20.23
  -4   0  -3  464.89   17.88
   3  -1  -4 1244.66   33.29
  -3   1   4 1418.24   35.18
   3  -1  -4 1437.24   37.84
  -3  -2  -7   78.05   17.51
  -3  -2  -7   84.64    6.30
   3   2   7   68.11    5.18
  -3  -2  -7   75.62    4.46
   3   2   7   68.13    6.29
   3   2   7   75.68   11.51
   3   0   7 7352.62   95.89
  -3   0  -7 7224.49   93.05
  -3   0  -7 7263.74   96.91
   3   0   7 6343.28   79.07
   2  -1   8   42.34    5.11
  -2   1  -8   50.54    7.59
   2  -1   8   45.62    5.58
  -2   1  -8   47.79   12.79
   2  -1   8   43.27    8.31
  -3   2  -5 3182.28   45.19
  -3   2  -5 3127.83   40.22
   3  -2   5 3189.96   45.35
   3  -2   5 3095.01   40.05
   3  -2   5 3245.31   46.00
  -2   3  -6  748.37   10.42
  -2   3  -6  756.50   20.35
   2  -3   6  787.19   23.64
   2  -3   6  747.08   25.61
  -2   3  -6  750.51   23.17
   2  -3   6  736.28   13.97
  -1   5   1 1087.85   28.76
   1  -5  -1 1072.79   28.21
   1  -5  -1 1040.41   25.85
   1  -5  -1 1131.34   28.79
  -1   5   1 1131.91   29.42
   4   3  -1  116.74    6.99
  -4  -3   1  120.06    8.93
  -4  -3   1  141.26    7.74
   4   3  -1  145.25   16.19
   4   3  -1  117.53   11.56
  -4  -3   1  140.64   11.35
  -4  -3   1  132.87    8.32
   3   5   3  387.47   16.17
   3   5   3  290.22   21.17
  -3  -5  -3  355.91   16.50
  -3  -5  -3  356.95   11.81
   2   2  -7  616.29   23.49
  -2  -2   7  708.38   12.65
  -2  -2   7  484.56   18.84
   2   2  -7  614.04   21.54
  -2  -2   7  687.74   23.87
   2   2  -7  607.29   20.95
  -1  -2   8  659.24   32.48
  -1  -2   8  561.82   19.54
   1   2  -8  660.71   25.36
   1   2  -8  578.71   20.72
   1   2  -8  434.74   19.28
  -1  -2   8  649.35   23.28
   0  -4  -6 1179.25   31.25
   0  -4  -6 1235.29   29.79
   0   4   6 1152.29   27.68
   0   4   6 1274.96   37.16
   0   4   6 1203.15   30.41
   2   5  -4  316.67   14.68
   2   5  -4  342.76   16.25
  -2  -5   4  325.80   14.13
  -2   0   7 1791.51   28.66
  -2   0   7 1743.27   23.70
   2   0  -7 1502.63   25.09
   2   0  -7 1620.98   26.16
   3   0  -5 1685.66   27.21
  -3   0   5 2017.89   32.55
   3   0  -5 2032.25   33.98
   0  -5  -4 1222.28   31.74
   0   5   4 1387.97   35.26
   0   5   4 1219.43   29.06
   0   5   4 1267.54   30.52
   0  -5  -4 1056.80   27.70
  -1   4  -6  788.06   21.29
  -1   4  -6  772.08   21.92
   1  -4   6  772.04   23.31
  -1   4  -6  762.83   19.25
   1  -4   6  786.09   22.75
  -4  -2   2 1031.22   27.50
   4   2  -2 1058.94   30.66
  -4  -2   2 1033.87   25.86
  -4  -2   2  928.71   22.07
   4   2  -2  782.35   21.46
  -4  -2   2  859.71   20.79
  -4  -2   2 1034.98   26.17
   1  -5   3   59.45   23.10
   1  -5   3   50.09    5.27
  -1   5  -3   53.32    8.81
  -1   5  -3   54.60    6.52
  -1   5  -3   53.75    9.43
   1   6   0 1930.72   30.27
   1   6   0 1817.74   26.04
  -1  -6   0 1681.85   37.44
  -1  -6   0 1562.57   23.84
  -1  -6   0 1790.54   25.13
  -1   0  -9  932.24   25.30
  -1   0  -9 1004.82   28.33
   1   0   9  927.88   25.44
   1   0   9  992.15   26.02
   1   5  -5 5028.50   74.26
   1   5  -5 5122.68   68.85
  -1  -5   5 4509.59   61.20
  -4   0   1  331.53   13.69
  -4   0   1  296.15   14.18
   4   0  -1  331.14   11.79
  -4   0   1  345.70   12.27
   4   0  -1  339.85   14.65
   4   0  -1  373.67   21.11
   3   4  -4  640.83   16.93
   3   4  -4  869.23   20.66
  -3  -4   4  820.23   20.04
   3   4  -4  762.33   21.76
  -3  -4   4  869.46   30.17
  -3  -4   4  806.45   20.58
   1   5   5 2549.24   38.30
   1   5   5 2249.60   34.40
   1   5   5 2252.32   29.75
  -1  -5  -5 2078.53   41.09
   1   5   5 2177.45   28.44
   4   1  -2    6.88    5.04
  -4  -1   2    6.54    2.74
   4   1  -2    4.44    2.37
  -4  -1   2    2.63    4.30
  -4  -1   2    2.62    5.51
   4   1  -2    4.93    4.75
   3   5  -2 3057.29   44.53
  -3  -5   2 2906.87   37.35
  -3  -5   2 2840.03   36.75
  -3  -5   2 2851.58   38.65
  -3  -5   2 2663.21   37.70
   3   5  -2 2502.85   35.53
  -4  -3  -4 2381.25   32.09
  -4  -3  -4 2372.70   33.13
   4   3   4 2720.75   37.77
   4   3   4 2240.61   33.62
  -1  -6   1 5057.15   64.73
   1   6  -1 5525.74   71.37
  -1  -6   1 5116.20   68.80
   1   6  -1 6015.48   80.59
  -1  -6   1 5283.28   67.79
  -1   1   8   63.02    6.38
   1  -1  -8   51.60    7.88
   1  -1  -8   56.35    7.60
  -1   1   8   54.42    8.85
   1  -1  -8   57.65    4.73
   4   0   4    1.76    7.69
  -4   0  -4    1.96    3.71
   4   0   4    2.02    4.02
   3  -3   1 3268.79   44.88
  -3   3  -1 3210.56   43.39
   3  -3   1 2525.59   34.27
  -3   3  -1 2958.78   43.44
  -3   3  -1 3191.56   43.07
   3  -3   1 3611.95   50.66
  -3  -3   5   55.51    5.69
  -3  -3   5   61.68    7.71
  -3  -3   5   43.85    4.23
   3   3  -5   59.94    5.52
   3   3  -5   40.61    7.79
   3   3  -5   51.09   11.93
  -1  -6  -1   63.13    9.88
   1   6   1   56.59    7.72
   1   6   1   66.53    4.82
  -1  -6  -1   71.69    5.45
   1   6   1   77.88    8.68
  -1  -6  -1   71.64   10.52
  -3   2   3 1084.10   27.91
   3  -2  -3 1286.47   33.28
  -3   2   3 1023.25   28.02
  -3   2   3 1063.26   25.24
   3  -2  -3 1191.33   28.03
   3  -3   2 3054.31   43.89
  -3   3  -2 2737.20   40.65
   3  -3   2 2339.77   31.81
  -3   3  -2 2975.85   40.26
   3  -3   2 2907.93   42.16
  -2  -5  -5 1315.24   32.81
   2   5   5 1440.32   36.81
   2   5   5 1228.32   16.18
   2  -4   4  803.71   22.82
   2  -4   4  855.24   22.45
  -2   4  -4  860.05   22.79
  -2   4  -4  815.53   23.35
   2  -4   4  884.04   23.21
  -1  -1  -9 4769.79   63.68
   1   1   9 4362.30   60.05
   1   1   9 4640.19   65.73
   0   0   9 5118.57   69.28
   0   0  -9 4552.55   64.01
   0   0   9 5372.86   70.78
   0   0  -9 5167.81   69.00
  -2   4   2   12.27    9.22
  -2   4   2    9.66    5.40
  -2   4   2   12.94    5.57
   2  -4  -2   19.98   10.98
   2  -4  -2   18.50    8.35
   0   5  -5 1937.38   26.01
   0  -5   5 1972.65   31.48
   0   5  -5 1993.31   30.91
   0  -5   5 1960.29   26.82
   0   5  -5 1826.50   29.45
   1  -5  -2 1923.99   30.82
  -1   5   2 1921.30   29.44
  -1   5   2 2063.84   32.26
  -4  -4  -1 6023.91   77.39
  -4  -4  -1 5984.52   77.73
   4   4   1 4395.08   65.82
  -4  -4  -1 4673.67   62.40
  -4  -4  -1 4852.28   62.40
  -4  -4  -1 5733.91   74.71
   4   4   1 6319.08   83.24
   4   1   5    1.54    3.88
   4   1   5    4.06    6.82
  -4  -1  -5    0.45    2.35
   2   6   0  552.24   19.34
   2   6   0  569.42   19.91
   2   6   0  646.29   24.66
  -2  -6   0  526.43   20.46
  -2  -6   0  458.61   19.79
  -2  -6   0  598.55   20.75
   4   2   5  583.87   20.70
   4   2   5  626.92   23.84
  -4  -2  -5  703.78   13.94
  -4  -2  -5  745.11   12.75
   4   2   5  791.61   18.61
  -4  -2  -5  570.43   19.13
  -3   3   0   24.56    8.04
   3  -3   0   25.65   11.20
  -3   3   0   17.93    8.53
   3  -3   0   17.12    4.91
  -3   3   0   16.95    6.64
   3  -3   0   14.74    3.56
   0  -3   8  138.39    9.76
   0  -3   8  136.37   24.77
   0   3  -8  129.09    9.61
   0   3  -8  132.90    7.50
   0   3  -8  132.31    9.77
   0  -1   9    5.13    9.14
   0  -1   9    1.97    4.66
   0   1  -9    2.70    4.03
   0   1  -9    2.08    5.59
   0  -1   9    1.41    4.23
   2   6   1  675.20   25.22
  -2  -6  -1  530.98   20.56
  -2  -6  -1  510.19   18.62
   2   6   1  574.84   21.23
  -2  -6  -1  632.19   21.52
   2   6   1  591.47   20.16
  -4  -4  -2 2907.51   39.21
  -4  -4  -2 2845.28   39.90
   4   4   2 2140.92   36.94
  -4  -4  -2 2408.97   32.85
   4   4   2 2983.79   41.44
  -1  -3  -8   48.06   12.31
   1   3   8   43.67    9.69
   1   3   8   50.46    9.25
  -1  -3  -8   62.97   18.74
   1   3   8   45.28    9.05
  -1   1  -9  549.21   21.05
   1  -1   9  520.20   21.56
   1  -1   9  531.04   20.90
  -1   1  -9  512.46   23.25
   1  -4  -5  307.17   13.14
   1  -4  -5  325.66   13.38
  -1   4   5  335.32   15.52
   1  -4  -5  315.70   14.50
  -1   4   5  324.83   22.07
  -1   4   5  317.72   13.54
   2   4  -6  466.27   18.38
  -2  -4   6  561.88   31.45
  -2  -4   6  501.18   18.74
   2   4  -6  463.65   17.96
  -2  -4   6  468.77   15.48
  -4  -4   0 5270.07   68.90
  -4  -4   0 5596.48   72.23
   4   4   0 5877.32   79.24
  -4  -4   0 4642.75   60.24
   4   4   0 4250.94   56.02
  -4  -4   0 5688.11   73.78
   4   4   0 4395.54   63.90
  -4  -3   2 2063.78   29.28
   4   3  -2 2141.99   31.97
  -4  -3   2 1780.09   26.78
   4   3  -2 1518.42   29.33
  -4  -3   2 2082.74   34.45
   1   6  -2 3679.00   50.05
  -1  -6   2 3591.75   48.40
   1   6  -2 3992.29   62.54
  -1  -6   2 3484.22   49.45
  -1  -6   2 3657.77   47.56
   2  -2  -6 1815.07   28.16
   2  -2  -6 1688.85   23.16
   2  -2  -6 1889.14   26.98
   2  -2  -6 1853.23   30.26
   3  -3   3  713.30   29.26
   3  -3   3  620.74   21.43
   3  -3   3  756.07   27.22
  -3   3  -3  684.98   26.45
  -3   3  -3  729.14   25.88
   0  -4   7  136.77   16.69
   0   4  -7  137.70   16.16
   0   4  -7  131.76    9.83
   0   4  -7  125.08    7.80
   0   4  -7  130.26    9.19
   2   6  -1  253.94    5.39
   2   6  -1  248.50    6.65
  -2  -6   1  238.29   15.56
  -2  -6   1  283.16   11.07
   2   6  -1  291.75   15.09
  -2  -6   1  207.15    8.62
  -1  -4  -7  468.95   16.65
   1   4   7  464.96   16.36
  -1  -4  -7  479.62   18.86
   1   4   7  440.95   21.30
   1   4   7  483.64   19.84
   3   5   4   51.37    7.54
  -3  -5  -4   72.23    8.59
   3   5   4   76.74    7.96
  -3  -3  -7  102.43    8.86
  -3  -3  -7   83.18    5.89
   3   3   7   89.56    6.16
   3   3   7   78.76   15.84
  -3  -3  -7  109.75   14.67
   3   3   7   88.71    5.09
  -1  -6  -2 4093.35   52.17
  -1  -6  -2 3752.57   52.57
   1   6   2 4352.49   55.54
  -1  -6  -2 3629.83   49.38
   1   6   2 4795.56   66.69
   3  -1   7 2984.69   39.12
  -3   1  -7 3051.35   43.37
   3  -1   7 3175.78   46.13
  -3   1  -7 3161.52   45.58
   3  -1   7 2996.31   38.75
  -3  -4  -6  600.11   23.12
   3   4   6  516.08   20.62
  -3  -4  -6  485.13   18.13
   3   4   6  472.74   16.06
  -3  -4  -6  602.51   20.08
   3   4   6  573.99   23.64
   4  -1   2  220.00   17.16
   4  -1   2  248.88   16.96
   4  -1   2  227.95    9.43
  -4   1  -2  219.85   10.74
  -4   1  -2  232.74    9.64
  -4   1  -2  226.12   10.41
  -4   1  -1   18.22    7.35
   4  -1   1   22.25   10.07
   4  -1   1   22.76    6.02
  -4   1  -1   16.18    5.90
  -4   1  -1   14.75    4.87
   4  -1   1   14.32    3.17
   1  -5   4 1694.03   27.97
  -1   5  -4 1707.03   28.66
  -1   5  -4 1724.39   26.38
  -1   5  -4 1847.69   28.29
   1  -5   4 1809.52   30.50
  -2  -6  -2  878.28   20.55
   2   6   2  810.99   21.76
   2   6   2  970.28   27.09
  -2  -6  -2  750.65   19.91
  -2  -6  -2  768.11   22.53
   2   6   2  836.97   19.65
   2   4   7 2002.32   32.46
   2   4   7 2045.85   31.59
  -2  -4  -7 2168.55   33.61
  -2  -4  -7 2101.26   27.59
   2   3   8 1023.41   27.31
   2   3   8  972.99   23.47
   2   3   8  948.64   25.18
  -2  -3  -8 1124.07   28.43
   0  -1  -9 3024.59   45.34
   0   1   9 3019.87   41.14
   0   1   9 2828.23   44.21
  -2  -3   7 1292.50   31.43
  -2  -3   7 1366.73   43.67
   2   3  -7 1216.56   29.35
  -2  -3   7 1045.78   24.88
   2   3  -7 1133.73   27.85
   2   3  -7 1236.47   33.68
  -4  -4  -3   17.35    2.85
  -4  -4  -3   24.07    5.69
   4   4   3   24.11    4.74
  -4  -4  -3   22.70    5.69
   4   4   3   22.96   10.28
  -4  -4  -3   30.74    6.61
   3  -2   6 4018.73   52.06
   3  -2   6 3878.57   49.38
   3  -2   6 3900.04   54.63
   3  -2   6 3982.74   56.63
  -3   2  -6 3861.70   54.22
   1   4  -7 1894.50   31.09
   1   4  -7 1813.20   23.78
  -1  -4   7 1820.10   28.23
  -1  -4   7 1892.69   30.98
  -3   3   1 2432.02   34.60
   3  -3  -1 2707.95   37.16
  -3   3   1 2466.52   38.09
  -3   3   1 2595.50   35.58
   3  -3  -1 2968.28   44.61
  -2   1   7   35.57    9.35
   2  -1  -7   40.27    3.08
   2  -1  -7   32.28    8.69
  -2   1   7   39.03   20.72
   2  -1  -7   40.04    6.78
   4   0  -2    8.25    2.91
  -4   0   2    9.75    3.51
  -4   0   2    7.69    5.90
   4   0  -2   11.67    7.25
  -4   0   2    6.88    4.15
   4   0  -2    9.20    4.81
   4  -1   3  695.52    4.94
   4  -1   3  753.86   21.06
   4  -1   3  782.45   22.05
  -4   1  -3  742.61   24.63
  -4   1  -3  709.35   20.52
   4  -1   0  108.46    9.71
  -4   1   0   85.91    6.11
   4  -1   0  100.25    6.64
   4  -1   0   89.68    6.05
  -4   1   0   89.67   24.29
  -4   1   0   75.56   12.38
   4   4  -1  587.18   18.30
  -4  -4   1  598.26   22.06
  -4  -4   1  672.69   18.17
   4   4  -1  824.73   21.98
  -4  -4   1  792.46   21.14
  -4  -4   1  690.52   18.30
   4   4  -1  823.24   23.72
   0   6   0    3.72    4.24
   0  -6   0   11.95    5.73
   0   6   0   11.49    5.45
   0  -6   0   12.18    4.79
   0   6   0    6.50    5.60
   0  -6   0    0.36    6.90
  -4   0  -5  158.58   13.66
   4   0   5  183.44   15.16
   4   0   5  164.33   12.30
   0   6  -1  386.56   14.81
   0  -6   1  488.14   18.14
   0   6  -1  514.84   25.27
   0  -6   1  478.04   17.69
   0   6  -1  487.54   19.34
   0  -6   1  436.20   18.09
   2  -2   8  385.30   17.81
   2  -2   8  378.07   14.40
   2  -2   8  380.99   15.20
  -2   2  -8  375.93   21.63
  -2   2  -8  384.42   17.30
  -3  -5   3  908.86   21.25
  -3  -5   3  887.13   20.88
   3   5  -3  979.07   31.75
   3   5  -3  793.97   22.18
  -3  -5   3  854.82   22.58
  -4  -3  -5 1294.87   30.26
  -4  -3  -5 1507.31   37.86
   4   3   5 1415.52   17.70
   4   3   5 1176.25   28.63
   4   3   5 1674.81   14.17
  -4  -3  -5 1611.97   17.37
   4   2  -3  802.25   22.47
  -4  -2   3  958.99   23.02
  -4  -2   3  962.01   22.66
  -4  -2   3 1045.22   28.61
   4   2  -3 1098.25   28.33
  -1  -3   8   35.67    8.17
   1   3  -8    7.59    3.80
   1   3  -8   40.85    8.27
  -1  -3   8   31.05    6.93
  -1  -3   8   34.52    5.53
   2   1   9    6.03    7.08
  -2  -1  -9    0.55    3.10
  -2  -1  -9    0.82    2.71
   2   1   9    1.08    4.10
  -2  -1  -9    4.90   10.06
  -2  -6   2  780.10   19.44
  -2  -6   2  930.80   24.30
  -2  -6   2  906.83   24.72
   2   6  -2 1046.99   28.45
   2   6  -2  925.12   22.29
   2   6  -2  911.00   23.79
   1  -3   8   40.02   18.84
  -1   3  -8   29.22    8.73
   1  -3   8   26.21   10.87
  -1   3  -8   26.20    5.29
  -1   3  -8   20.67    9.52
   2  -3  -5 1088.87   29.35
  -2   3   5  944.30   26.90
   2  -3  -5 1021.65   25.69
  -2   3   5 1096.06   29.84
   2  -3  -5 1050.22   25.45
   2   0   9  294.08   12.47
  -2   0  -9  291.88   12.03
  -2   0  -9  329.75   17.03
  -2   0  -9  326.07   18.60
   2   0   9  317.68   15.34
  -3  -1  -8 3377.93   48.62
   3   1   8 3164.30   51.23
   3   1   8 2738.02   36.72
  -3  -1  -8 3385.59   47.92
   3  -3   4  109.79    8.87
   3  -3   4  124.76   10.15
   3  -3   4  105.55   10.13
  -3   3  -4  114.42    8.74
  -3   3  -4  103.95    9.47
   3   1  -6  220.69   12.05
   3   1  -6  277.62   13.56
  -3  -1   6  265.39    9.00
  -3  -1   6  257.63   12.49
   1   2   9  767.88   22.92
  -1  -2  -9  879.72   23.73
  -1  -2  -9  964.93   24.40
   1   2   9  894.21   67.88
   1   2   9  854.24   22.32
  -3   1   5 6882.33   90.02
   3  -1  -5 6065.08   81.29
   3  -1  -5 7356.85   34.57
   2  -4   5  917.51   23.32
   2  -4   5  912.16   35.85
  -2   4  -5  928.45   23.80
   2  -4   5  940.34   24.86
  -2   4  -5  888.56   24.49
  -4  -1   3  820.59   21.79
   4   1  -3  646.30   18.66
  -4  -1   3  794.20   18.53
  -4  -1   3  829.34   19.00
   4   1  -3  892.78   24.95
   1   6  -3   48.68    6.58
   1   6  -3   83.15   11.27
   1   6  -3   75.76    8.66
  -1  -6   3   83.24   20.55
  -1  -6   3   69.73    4.59
   2   5  -5  915.54   25.75
   2   5  -5  840.82   23.66
  -2  -5   5  888.47   23.30
  -3  -2   6  256.39    9.69
  -3  -2   6  246.21   19.16
  -3  -2   6  205.79    9.98
   3   2  -6  193.44    8.14
   3   2  -6  261.24    8.65
   3   2  -6  210.70   13.40
  -1   5   3 4216.22   58.49
   1  -5  -3 3952.15   56.18
   1  -5  -3 4010.38   57.51
  -1   5   3 4029.76   54.74
   0   2  -9   24.93   14.34
   0  -2   9   15.15    4.44
   0  -2   9   20.23   14.50
   0   2  -9   20.89    7.29
   0  -2   9   17.45    4.53
  -2   3  -7 1597.43   19.22
   2  -3   7 1637.05   22.15
   2  -3   7 1597.02   40.07
   2  -3   7 1564.30   37.37
   0   6   1   94.58   24.77
   0  -6  -1   82.97   12.69
   0  -6  -1   77.14   10.41
   0   6   1   87.48   18.95
   0  -6  -1   82.06    9.24
  -2   4   3  209.47   11.78
  -2   4   3  174.96   12.76
   2  -4  -3  225.20   13.29
   2  -4  -3  206.37   14.89
  -2   4   3  190.73   11.93
   0  -6   2  482.16   19.54
   0   6  -2  568.79   22.82
   0   6  -2  421.80   15.71
   0   6  -2  528.51   20.70
   0  -6   2  534.81   19.15
   0  -5  -5   21.14    7.13
   0   5   5   22.12    8.90
   0  -5  -5   24.44   11.84
   0   5   5   18.99    3.42
   0   5   5   27.18   12.37
  -1  -6  -3 3385.42   46.85
   1   6   3 3895.21   49.88
  -1  -6  -3 3369.37   48.18
   1   6   3 4233.76   59.02
  -1  -6  -3 3521.63   45.10
  -2  -6  -3 4013.71   54.01
   2   6   3 4909.91   67.69
  -2  -6  -3 3862.27   54.41
   0   3   8  641.68   17.94
   0   3   8  595.46   21.33
   0  -3  -8  631.88   17.12
   0  -3  -8  541.54   11.67
   0   3   8  617.32   19.83
  -3   0  -8 1825.38   32.67
   3   0   8 1775.35   39.12
  -3   0  -8 1766.37   28.98
  -3   0  -8 1664.24   22.93
   3   0   8 1576.78   22.41
   3   2   8 1846.02   28.22
   3   2   8 2062.34   31.79
  -3  -2  -8 2138.18   33.52
  -3  -2  -8 2172.97   30.65
   3   2   8 1725.45   27.59
   1  -3  -7  408.06   23.89
  -1   3   7  442.23   19.57
  -1   3   7  405.68   21.80
   1  -3  -7  422.19   16.59
   1  -3  -7  408.94   18.77
  -4  -4  -4 2605.09   35.56
  -4  -4  -4 2639.07   38.28
   4   4   4 2908.05   39.99
   4   4   4 2259.22   34.25
  -4  -4  -4 2561.84   34.74
   4   1   6  190.40   11.57
  -4  -1  -6  180.89    9.75
  -4  -1  -6  182.71   10.80
   4  -1   4  156.26   11.05
   4  -1   4  158.29   12.21
  -4   1  -4  148.67   11.09
  -3   2   4 1425.39   24.22
   3  -2  -4 1320.16    9.38
  -3   2   4 1330.75   23.86
   3  -2  -4 1598.97   37.00
   3  -2  -4 1498.02    8.91
  -1   2  -9   14.06    7.04
   1  -2   9   12.45    6.69
   1  -2   9   17.01    7.86
  -1   2  -9   24.05   11.21
  -1   2  -9   20.16    8.22
   4   2   6  101.67    5.66
  -4  -2  -6   76.97    4.09
  -4  -2  -6   92.24   12.84
   4   2   6   94.76    8.91
  -4  -2  -6   93.18    7.05
   4   2   6   78.50    5.92
  -4   1   1  137.51    7.73
   4  -1  -1  157.02   10.94
   4  -1  -1  165.83    7.64
   4  -1  -1  188.54   11.70
  -4   1   1  170.70    7.67
  -4   1   1  149.75   21.09
  -4  -3   3 4324.21   58.17
   4   3  -3 3129.93   48.36
   4   3  -3 4437.99   60.12
  -4  -3   3 4291.53   56.74
  -4  -3   3 3935.67   51.61
   3   4  -5    8.85    3.26
   3   4  -5    7.95    3.66
  -3  -4   5   11.12    5.36
  -3  -4   5    4.95    6.82
   3   4  -5    8.57    7.27
  -3  -4   5    9.04    3.85
   1  -2  -8   22.59    5.98
  -1   2   8   36.43   18.15
  -1   2   8   28.42    4.42
   1  -2  -8   29.18    6.17
   1  -2  -8   28.88    5.44
   1  -4   7   11.09    7.52
  -1   4  -7    2.68    2.60
  -1   4  -7    6.12    4.51
   1   5  -6 3600.38   54.24
   1   5  -6 3419.96   49.40
  -1  -5   6 3399.08   49.41
   1   5   6 2319.24   40.59
   1   5   6 2119.88   32.72
  -1  -5  -6 2054.36   35.70
   1   5   6 2052.18   28.07
   3   5   5   -0.08    6.52
  -3  -5  -5   -1.80    4.96
   3   5   5    4.02    6.97
   2   5   6 4190.60   51.44
  -2  -5  -6 4235.07   57.57
   2   5   6 4190.25   58.04
   3  -3  -2 5530.91   85.82
  -3   3   2 4838.26   62.23
   3  -3  -2 5133.11   65.86
  -3   3   2 4527.52   66.73
  -3   3   2 4603.94   61.35
  -2  -2  -9  804.02   23.74
   2   2   9  647.68   19.66
   2   2   9  768.11   22.32
  -2  -2  -9  756.38   25.37
   2   2   9  696.70    9.40
   0  -5   6 1825.70   25.37
   0  -5   6 1821.02   30.96
   0   5  -6 1894.65   30.70
   0   5  -6 1887.55   26.23
   0   5  -6 1945.00   31.73
  -1  -1   9    6.73    3.13
   1   1  -9   -0.27    5.06
  -1  -1   9    4.09    5.88
   1   1  -9    3.82    6.61
   1   1  -9    1.10    2.55
  -1  -1   9    7.97    3.72
   4   4  -2 4752.39   65.42
  -4  -4   2 6285.15   79.80
   4   4  -2 6636.77   86.44
  -4  -4   2 6630.94   86.02
   0  -4  -7 1140.90   30.11
   0   4   7 1131.23   29.12
   0   4   7 1212.52   32.03
   0   4   7 1134.11   27.72
   0  -4  -7 1170.73   29.02
   3   0  -6 1746.20   31.22
  -3   0   6 1972.75   31.31
   3   0  -6 2016.27   32.44
   2  -1   9   25.48   10.45
   2  -1   9   20.72   10.25
   2  -1   9   19.45    7.13
  -2   1  -9   20.29    8.65
  -2   1  -9   17.85    8.77
   2   1  -8 3104.58   45.11
   2   1  -8 2708.64   39.54
  -2  -1   8 3416.91   49.84
  -2  -1   8 3427.99   45.15
   2   1  -8 3043.89   41.26
   0   6   2  403.91   15.65
   0  -6  -2  360.25   15.43
   0   6   2  439.49   34.62
   0  -6  -2  376.00   14.01
   0  -6  -2  366.68   26.89
  -1   5  -5 1832.13   26.43
  -1   5  -5 1901.64   31.10
  -1   5  -5 1888.22   30.82
   1  -5   5 1797.76   42.72
   1  -5   5 1888.53   29.05
   1   0  -9  103.94   10.61
   1   0  -9  132.39    7.96
  -1   0   9  138.62   13.41
  -1   0   9  146.40   12.38
   1   0  -9  133.85   12.31
  -2  -6   3   11.03    4.10
  -2  -6   3   12.04    3.56
  -2  -6   3   14.92    8.56
   2   6  -3   16.26    9.05
  -2  -6   3   13.83    6.14
   2   6  -3   17.81    7.95
   0   6  -3    7.80    8.21
   0  -6   3    7.24    6.92
   0   6  -3   11.02    4.34
   0  -6   3   12.91    5.26
   0   6  -3   16.05   10.85
  -3  -3   6  718.36   17.91
  -3  -3   6  962.87   23.92
   3   3  -6  769.80   19.05
  -3  -3   6  987.98   27.02
   3   3  -6  857.93   23.97
   3   3  -6  996.91   25.44
   0  -2  -9 4128.86   60.32
   0   2   9 5112.54   74.78
   0   2   9 4899.68   66.62
   0  -2  -9 4958.01   65.29
   3   6   1  778.21   18.80
   3   6   1 1086.25   29.05
   3   6   1  994.49   24.85
  -3  -6  -1  979.25   24.41
  -3  -6  -1  845.81   23.75
  -3  -6  -1 1012.52   23.84
  -4   0   3  164.20    9.40
   4   0  -3  187.99   11.93
  -4   0   3  148.25   11.34
  -3  -6   0   10.49    7.82
   3   6   0   12.79    5.46
  -3  -6   0    4.82    5.37
  -3  -6   0    9.73    3.21
   3   6   0   13.83   12.70
   3   6   0   10.65    4.95
   3  -3   5 3590.07   50.37
  -3   3  -5 3476.67   52.73
   3  -3   5 3278.82   43.36
  -3   3  -5 3450.40   45.41
   3  -3   5 3348.58   50.48
   2   2  -8  585.72   20.77
   2   2  -8  588.44   31.51
  -2  -2   8  688.23   26.97
  -2  -2   8  674.85   26.20
   2   2  -8  566.47   20.57
  -2  -2   8  494.75   17.76
   4   0   6  264.32   11.59
   4   0   6  237.50   12.97
  -4   0  -6  239.59   12.25
  -1  -6   4 1243.57   32.99
   1   6  -4 1352.49   35.98
   1   6  -4 1294.43   39.19
   1   6  -4  844.42   19.69
  -1  -6   4 1296.67   29.87
  -2   0   8 1973.89   32.98
   2   0  -8 1911.18   25.78
   2   0  -8 1644.56   27.11
   2   0  -8 1908.08   30.52
  -2   0   8 2109.96   33.77
   1  -4  -6 1867.59   28.25
  -1   4   6 2005.78   33.03
  -1   4   6 1877.42   29.04
   1  -4  -6 1916.87   33.32
   1  -4  -6 1851.54   30.71
  -3  -5   4  141.19   10.15
  -3  -5   4  135.87    5.99
   3   5  -4  133.75   10.95
   3   5  -4  153.16   19.66
  -3  -5   4  138.00    5.73
  -3  -6  -2 1182.57   27.19
  -3  -6  -2  969.23   26.27
   3   6   2 1137.52   28.16
   3   6   2 1270.73   32.86
   3   6   2  961.02   22.23
  -3  -6  -2 1137.11   30.18
  -4  -3  -6  184.43    8.32
  -4  -3  -6  261.57   13.88
  -4  -3  -6  241.98   10.68
   4   3   6  187.76   11.22
   4   3   6  225.84   13.25
   4   3   6  263.12    5.82
  -1  -2   9    2.11    2.85
   1   2  -9    1.76    8.31
  -1  -2   9    0.56    7.66
  -1  -2   9    5.37    4.21
   1   2  -9    0.22    1.88
   4   5   1 2065.61   32.32
  -4  -5  -1 1872.71   27.07
   4   5   1 1537.08   30.07
  -4  -5  -1 1953.47   28.70
   4   5   1 1590.17   23.58
  -4  -5  -1 1766.04   24.89
   3   4   7   80.39   21.67
   3   4   7   89.47   15.68
   3   4   7   70.09    4.08
  -3  -4  -7   85.90    8.81
  -3  -4  -7   88.01    4.85
  -2  -6  -4  547.38   22.39
   2   6   4  669.42   28.28
  -2  -6  -4  531.73   28.78
  -3   2  -7 1443.92   36.92
   3  -2   7 1440.18   33.84
   3  -2   7 1456.48   34.60
   3  -2   7 1464.30   37.48
   3  -2   7 1502.87   38.69
   4  -1   5  242.11   25.88
   4  -1   5  230.04   15.62
  -4   1  -5  221.24   12.44
   1   6   4   33.89    7.67
   1   6   4   33.53    8.62
  -1  -6  -4   26.75    6.05
   1   6   4   31.05    5.23
  -1  -6  -4   24.62    7.97
  -3  -6   1 1325.11   31.40
   3   6  -1 1570.32   40.07
  -3  -6   1 1395.94   33.09
   3   6  -1 1231.37   30.02
  -3  -6   1 1454.66   34.58
  -3  -6   1 1286.49   33.14
  -4  -5  -2 3415.37   46.85
  -4  -5  -2 2858.04   39.67
  -4  -5  -2 3069.62   40.02
   4   5   2 3619.82   53.60
   4   5   2 2681.41   43.21
  -4   1   2   51.41    9.51
  -4   1   2   52.27   22.36
   4  -1  -2   65.78    8.97
   4  -1  -2   54.49    5.37
   4  -1  -2   57.31    5.60
  -4   1   2   54.43    3.46
  -4  -2   4 2969.50   42.60
   4   2  -4 2403.07   36.19
   4   2  -4 3312.45   50.01
  -4  -2   4 2843.70   36.15
  -4  -2   4 3034.98   38.89
   4   4   5 3482.18   50.41
  -4  -4  -5 3985.25   52.44
  -4  -4  -5 3613.63   47.74
   4   4   5 4330.18   58.52
   3  -1   8  704.99    8.27
  -3   1  -8  713.07   27.09
   3  -1   8  719.15   27.25
   3  -1   8  707.39   24.12
  -3   1  -8  734.29   14.84
   1  -5  -4 1466.82   26.41
  -1   5   4 1467.14   26.79
  -1   5   4 1575.17   27.35
   1  -5  -4 1429.40   24.90
   4   5   0  478.31   17.70
  -4  -5   0  602.39   21.54
  -4  -5   0  581.76   20.53
  -4  -5   0  556.28   19.89
  -4  -5   0  482.79   18.68
   4   5   0  679.13   26.80
  -2  -4   7  169.13    7.07
  -2  -4   7  167.33   12.33
  -2  -4   7  185.45   12.09
   2   4  -7  189.15    7.98
   2   4  -7  189.67   11.47
   2  -4   6  757.93   23.32
  -2   4  -6  777.13   22.62
  -2   4  -6  790.25   21.62
   2  -4   6  817.22   22.90
   2  -4   6  797.77   20.60
   3   3   8  858.46   22.44
  -3  -3  -8 1021.82   25.05
  -3  -3  -8  783.15   20.34
  -3  -3  -8  999.80   27.86
   3   3   8  947.02   28.53
   3   3   8  840.24   21.23
   2  -4  -4   36.94    8.88
  -2   4   4   39.89   18.29
   2  -4  -4   26.91    5.94
   2  -4  -4   31.03    8.08
  -2   4   4   37.29   16.57
  -2   5  -1 2034.41   32.16
   2  -5   1 2087.09   32.92
   2  -5   1 2262.02   34.02
  -2   5  -1 2293.35   34.12
  -4  -1   4 1688.45   27.30
   4   1  -4 1705.00   18.47
   4   1  -4 1325.95   23.67
   1   0  10 1040.64   27.66
  -1   0 -10 1013.45   27.39
   1   0  10  912.47   25.80
  -1   0 -10 1070.06   29.93
   0   4  -8  414.92   18.23
   0  -4   8  427.75   18.60
   0  -4   8  441.48   18.82
   0   4  -8  437.63   16.02
   0   4  -8  434.16   23.82
   2  -2  -7   56.47    9.30
  -2   2   7   64.43   15.69
   2  -2  -7   57.14    8.76
   2  -2  -7   56.31    5.69
   0   6   3  240.81   10.78
   0  -6  -3  223.12   12.63
   0  -6  -3  219.91   13.21
   0  -6  -3  226.07    9.77
   0   6   3  257.60   14.98
  -2   5  -2  245.28   24.17
  -2   5  -2  226.35   22.02
   2  -5   2  233.68   13.88
   2  -5   2  242.77   13.79
   1  -1  -9    3.02    7.27
   1  -1  -9   -2.23    7.55
   1  -1  -9    1.43    2.65
  -1   1   9    3.13    5.72
  -1   1   9    0.87    2.53
  -1  -4  -8  304.27   11.69
  -1  -4  -8  301.03   14.47
   1   4   8  296.06   11.49
   1   4   8  299.76   14.76
   1   4   8  310.30   14.31
  -2   5   0  920.85   25.98
   2  -5   0  926.70   25.72
  -2   5   0 1023.11   27.16
   2  -5   0 1078.45   29.53
   0  -3   9  361.25   16.26
   0  -3   9  372.55   17.40
   0   3  -9  322.97   14.56
   0   3  -9  329.42   12.64
   0   3  -9  364.67   16.60
   0  -6   4   66.65   10.30
   0  -6   4   70.52   12.62
   0   6  -4   62.65    5.28
   0   6  -4   73.55   16.28
   0   6  -4   60.45   12.53
   4  -2   2 1200.00   28.39
  -4   2  -2 1434.57   33.96
   4  -2   2 1589.24   51.39
   4  -2   2 1447.87   35.88
  -4   2  -2 1367.43   35.86
  -3  -6  -3  937.79   24.23
   3   6   3 1077.67   30.46
  -2  -4  -8  280.67   10.74
   2   4   8  266.53   10.09
   2   4   8  263.84   15.06
  -2  -4  -8  288.59   30.51
   2   4   8  264.39   13.23
  -3   3   3 1784.85   29.54
   3  -3  -3 2159.24   38.48
  -3   3   3 1866.23   25.76
   3  -3  -3 2052.07   28.73
  -4  -4   3 2069.84   28.76
  -4  -4   3 2129.54   33.39
  -4  -4   3 1905.39   28.23
   4   4  -3 1539.68   27.88
   4   4  -3 2122.43   31.06
   4  -2   1  405.09   16.36
   4  -2   1  343.32   13.30
   4  -2   1  425.56   18.30
  -4   2  -1  356.81   15.96
  -4   2  -1  354.07   19.66
  -4   2  -1  379.49   14.36
   1   3   9  177.56   10.48
  -1  -3  -9  203.17   10.15
   1   3   9  195.03    9.60
  -1  -3  -9  191.61   12.29
   1   3   9  177.58   12.81
  -4  -5  -3   56.16    5.94
   4   5   3   64.21   15.27
  -4  -5  -3   69.17   14.19
   4   5   3   53.75   10.61
  -4  -5  -3   52.14    2.96
   1   1  10   49.37   26.00
  -1  -1 -10   50.97    6.26
   1   1  10   48.37   23.88
  -1  -1 -10   58.04   10.58
   2   5  -6   42.18   17.98
  -2  -5   6   40.31    8.35
   2   5  -6   53.69   24.24
  -4  -5   1   36.31    4.95
  -4  -5   1   42.62    8.54
  -4  -5   1   35.56    4.80
  -4  -5   1   34.79    5.72
   4   5  -1   48.19   29.83
   4   5  -1   35.59   14.74
   2  -3  -6  624.11   13.25
   2  -3  -6  646.76   16.81
  -2   3   6  679.94   22.85
   2  -3  -6  632.21   16.42
  -4  -3   4 3365.84   45.36
  -4  -3   4 3557.54   49.41
   4   3  -4 2737.94   40.67
  -4  -3   4 3310.87   44.87
   4   3  -4 3661.34   49.60
   2   6  -4   29.52   13.76
   2   6  -4   33.60   11.84
  -2  -6   4   26.85   11.84
   0   0 -10  460.39   19.30
   0   0 -10  373.96   17.55
   0   0  10  477.98   19.03
   0   0  10  456.91   19.94
   4   1   7  322.45   11.13
  -4  -1  -7  307.29   12.96
  -4  -1  -7  301.03   15.35
   4   1   7  294.00   15.05
   3   6  -2  914.80   23.85
  -3  -6   2 1009.27   23.72
  -3  -6   2  899.02   21.84
  -3  -6   2  941.68   25.40
  -3  -6   2 1026.82   26.18
   3   6  -2 1085.08   29.63
   1   4  -8  410.92   14.69
   1   4  -8  430.80   19.98
   1   4  -8  252.64    9.17
  -1  -4   8  434.78   23.19
  -1  -4   8  421.15   17.83
   0   5   6  671.17   18.32
   0   5   6  682.37   18.45
   0   5   6  720.14   24.75
   0  -5  -6  626.44   19.13
   0  -5  -6  679.99   20.59
   1  -1  10  912.03   25.83
  -1   1 -10  935.87   25.53
  -1   1 -10  878.63   26.89
   1  -1  10  795.58   22.94
   4   2   7  106.33    6.37
  -4  -2  -7  108.66    5.62
  -4  -2  -7  131.94   10.01
  -4  -2  -7  123.81   18.88
   4   2   7  133.80   10.53
   4   2   7  130.50    6.14
   4  -2   3 1186.08   30.34
  -4   2  -3 1118.46   30.41
  -4   2  -3 1188.91   28.38
   4  -2   3  914.69   21.79
   4  -2   3 1259.81   34.44
   3   5   6   90.18    9.83
  -3  -5  -6   90.27    8.13
   3   5   6   68.94    9.14
   2   3   9 2117.02   33.19
  -2  -3  -9 2353.59   32.53
  -2  -3  -9 2285.60   41.03
   2   3   9 1982.07   32.26
  -2   5  -3    4.60    4.76
   2  -5   3   -0.85    7.12
   2  -5   3    3.22    7.36
  -2   5  -3    1.23    3.34
   2   3  -8  230.02    5.63
  -2  -3   8  203.07   15.55
   2   3  -8  260.63   15.33
  -2  -3   8  211.99    9.67
   2   3  -8  230.16   10.52
  -2  -3   8  257.16   11.15
   0  -1  10   97.66   24.68
   0   1 -10   90.95   11.00
   0  -1  10  102.16   11.84
   0   1 -10   82.31   20.26
   3  -1  -6 1015.74   27.16
   3  -1  -6  911.13   25.80
  -3   1   6 1035.81   27.60
   2  -3   8   37.78    9.80
   2  -3   8   37.03    7.09
  -2   3  -8   39.62    6.86
   2  -3   8   32.47    8.79
  -2   3  -8   41.12    9.25
   4  -2   0   67.62   12.79
   4  -2   0   53.88    6.48
   4  -2   0   47.28    7.63
  -4   2   0   54.16   11.73
  -4   2   0   59.33    9.56
  -4   2   0   57.15    7.45
   3  -2  -5 1554.78   20.52
  -3   2   5 1503.93   26.51
  -3   2   5 1657.26   28.04
   3  -2  -5 1681.14   22.05
   3  -2  -5 1798.82   30.13
  -1   5  -6   28.32    6.90
  -1   5  -6   19.78    9.06
  -1   5  -6   26.56    8.41
   1  -5   6   27.41    5.04
   1  -5   6   30.94   10.61
   2  -2   9  175.00   10.03
   2  -2   9  178.12    8.91
  -2   2  -9  191.22   12.96
  -2   2  -9  184.80   11.75
   2  -2   9  168.17   11.96
  -2   5   1  461.63   19.00
   2  -5  -1  460.42   20.46
  -2   5   1  412.45   24.72
   2  -5  -1  474.44   19.66
   3   1   9  373.11   14.47
  -3  -1  -9  443.29   17.74
  -3  -1  -9  387.00   14.44
   3   1   9  422.01   18.63
  -3  -1  -9  439.91   18.93
   3  -3   6  337.79   12.66
  -3   3  -6  334.39   13.79
  -3   3  -6  325.11   28.68
   3  -3   6  357.89   15.66
   3  -3   6  330.96   15.29
  -1   6  -1 1528.37   38.80
  -1   6  -1 1381.10   36.02
   1  -6   1 1519.41   39.00
   1  -6   1 1389.51   36.80
   2  -1  -8 1195.88   38.69
   2  -1  -8 1339.62   17.90
   2  -1  -8 1395.10   32.78
  -2   1   8 1492.76   32.55
  -2   1   8 1309.54   11.09
   3   1  -7    2.82    1.16
  -3  -1   7    5.91    7.97
   3   1  -7   -1.28    5.94
   3   1  -7    5.05    7.18
  -3  -1   7   -0.41    1.26
  -1   3  -9  518.18   20.50
   1  -3   9  499.53   21.12
   1  -3   9  538.51   22.80
  -1   3  -9  558.78   25.15
  -1   3  -9  526.70   21.41
  -1   6   0 2572.87   38.23
  -1   6   0 2389.23   36.23
   1  -6   0 2366.67   36.40
   1  -6   0 2345.05   38.19
  -3   4  -1  953.79   29.07
   3  -4   1  934.56   26.22
   3  -4   1 1019.81   27.44
  -3   4  -1  872.76   25.38
  -3  -2   7  264.01   14.58
  -3  -2   7  184.19   11.75
   3   2  -7  271.08   12.77
  -3  -2   7  264.00   10.55
   3   2  -7  239.09   30.43
   3   2  -7  203.74   10.73
   3  -4   2  738.81   19.31
  -3   4  -2  887.66   22.96
  -3   4  -2  819.48   24.34
   3  -4   2  900.45   24.93
   3  -4   2  760.76   25.73
  -3  -4   6 3386.78   47.51
   3   4  -6 2830.86   39.17
   3   4  -6 3125.07   45.40
  -3  -4   6 3667.87   52.50
   3   4  -6 3571.48   45.76
  -3  -4   6 2285.23   30.40
  -2  -5  -7 2513.67   38.19
   2   5   7 2499.70   39.71
   1   6  -5 5062.23   78.04
   1   6  -5 3352.65   41.63
  -1  -6   5 4714.18   64.83
   1   6  -5 4832.78   66.00
   1  -6   2  754.38   27.10
   1  -6   2  693.97   22.70
  -1   6  -2  756.72   28.11
  -1   6  -2  697.95   26.85
   4   0  -4  780.92   22.40
  -4   0   4  717.22   19.86
   4   0  -4  615.13   20.37
   0   5  -7  334.60   12.45
   0   5  -7  343.10   25.09
   0   5  -7  352.33   16.72
   0   5  -7  342.55   13.19
   0  -5   7  343.82   17.38
   4  -1   6 2124.10   37.23
   4  -1   6 2042.50   32.56
  -4   1  -6 1998.10   32.54
   1   5  -7  355.50   11.76
  -1  -5   7  340.68   16.24
   1   5  -7  359.93   20.89
   1   5  -7  353.09   16.68
  -4  -5  -4  340.92   12.60
   4   5   4  375.51   15.73
   4   5   4  306.16   15.15
  -4  -5  -4  361.61   15.65
  -4  -5  -4  313.83   11.09
  -2  -6  -5   26.08   17.30
   2   6   5   29.74   10.18
   2   6   5   34.07   18.51
   0  -1 -10    3.05    6.76
   0  -1 -10    5.43    6.38
   0   1  10   -2.97    8.57
   0   1  10    9.29    6.18
  -1  -5  -7 1028.02   30.10
   1   5   7 1094.14   31.12
   1   5   7 1150.54   31.36
   1   5   7 1048.67   25.25
   1   3  -9   89.51   26.83
  -1  -3   9  107.13   25.12
   1   3  -9   70.70    7.50
  -1  -3   9   95.77    8.27
  -1  -3   9  101.21    8.34
  -3   0  -9    2.60    2.68
   3   0   9    2.85    7.20
   3   0   9    2.86    4.03
  -3   0  -9   -1.30    5.20
  -3   0  -9   -1.97    7.80
   4  -2   4  104.45    9.23
   4  -2   4  124.14   11.16
  -4   2  -4  111.67    8.38
  -4   2  -4  108.37   12.02
   4  -2   4   80.75    5.21
   4  -1  -3   40.01    7.52
   4  -1  -3   28.95    4.21
  -4   1   3   24.61    8.83
  -4   1   3   32.82   11.75
  -4   1   3   29.78    1.97
  -1   4  -8  103.93   14.41
  -1   4  -8  107.24    7.60
  -1   4  -8  102.03   15.42
   1  -4   8  110.89   10.66
   1  -4   8  112.53   10.71
  -2  -1 -10   38.89    9.15
  -2  -1 -10   41.25   12.16
   2   1  10   39.67   19.44
   2   1  10   39.49    8.51
  -2   0 -10  202.03   11.40
   2   0  10  205.33   13.62
  -2   0 -10  196.30   18.33
   2   0  10  181.38   10.45
   3   6   4   90.27   18.63
   3   6   4  111.07   19.79
  -3  -6  -4   94.19    8.31
  -4   0  -7  823.85   23.30
  -4   0  -7  819.57   24.06
   4   0   7  818.17   24.61
  -3   4   0  240.91   13.11
   3  -4   0  247.67   14.78
   3  -4   0  284.54   14.52
  -3   4   0  227.77   19.11
   3   2   9 1313.38   14.09
  -3  -2  -9 1583.45   20.47
   3   2   9 1551.02   27.56
  -3  -2  -9 1657.03   15.34
   3   2   9 1371.75   33.35
   4   5  -2 3238.20   45.41
   4   5  -2 4586.11   64.11
  -4  -5   2 4296.14   58.78
  -4  -5   2 3856.31   56.56
  -4  -5   2 4184.43   53.93
  -4  -4  -6 1935.40   27.38
   4   4   6 2113.64   33.27
   4   4   6 1794.79   25.06
  -4  -4  -6 2435.15   38.05
  -4  -4  -6 2385.10   32.32
   4   4   6 2485.59   36.24
   1   6   5  263.71   18.46
  -1  -6  -5  223.15   11.94
   1   6   5  245.26    9.46
   1   6   5  224.40   11.52
  -1  -6  -5  222.34   12.31
   3  -4   3  492.78   20.70
   3  -4   3  532.69   22.60
  -3   4  -3  499.62   20.78
  -3   4  -3  552.45   20.73
   3  -4   3  552.96   21.51
  -4   2   1   79.51    7.05
   4  -2  -1   82.60    7.01
   4  -2  -1  114.14   11.69
  -4   2   1   92.57    6.59
   4  -2  -1   94.47    6.03
  -4   2   1   88.21   20.13
  -1   6   1  613.40   24.47
  -1   6   1  648.46   25.53
   1  -6  -1  628.72   23.63
   1  -6  -1  575.84   22.90
  -3  -5   5  513.32   11.99
  -3  -5   5  771.39   20.69
   3   5  -5  710.85   21.42
  -3  -5   5  774.21   17.73
  -1   3   8    3.77    4.18
   1  -3  -8    3.50    2.37
   1  -3  -8    2.31    5.68
   1  -3  -8    4.95    4.41
  -1   3   8   -1.67    8.07
   2  -5   4 2444.81   39.78
  -2   5  -4 2450.79   37.62
  -2   5  -4 2606.67   37.75
   2  -5   4 2600.98   38.56
  -4  -3  -7  762.27   19.15
   4   3   7  933.42   26.55
  -4  -3  -7 1014.87   30.70
  -4  -3  -7 1027.86   26.33
   4   3   7 1043.14   27.37
   4   3   7  785.70   20.38
   5   2   2   56.60    6.85
  -5  -2  -2   55.76   10.31
  -5  -2  -2   56.74    3.59
   5   2   2   59.54    7.17
  -5  -2  -2   54.15    8.35
   0  -6  -4  100.10    8.16
   0   6   4  105.52    7.18
   0   6   4  100.09    5.87
   0   6   4  121.15   22.97
   0  -6  -4  107.93   13.07
  -5  -2  -1  794.66   21.28
   5   2   1  917.34   26.15
  -5  -2  -1  884.82   21.71
  -5  -2  -1  746.79   21.23
  -5  -2  -1  845.90   21.07
   5   2   1  724.25   20.36
  -1  -2 -10   34.72   15.16
  -1  -2 -10   38.74    6.48
   1   2  10    8.64    5.46
   1   2  10   37.60    9.83
   3   6  -3  339.11   29.50
   3   6  -3  291.47   13.08
  -3  -6   3  307.14   14.62
  -3  -6   3  244.57    8.60
  -3  -6   3  312.85   11.17
   0   3   9 2001.15   30.05
   0  -3  -9 1766.30   32.01
   0  -3  -9 1991.58   30.41
   0   3   9 1949.44   32.30
   0   2 -10  225.41   10.92
   0  -2  10  230.19   10.56
   0  -2  10  241.47   18.70
   0  -2  10  244.43   13.24
   0   2 -10  258.65   10.57
   0  -6   5 1315.66   35.28
   0  -6   5 1362.15   32.69
   0   6  -5 1445.11   37.02
   0   6  -5 1370.97   35.77
   0   6  -5 1259.97   29.98
   1  -5  -5   12.19    6.34
  -1   5   5    7.01    7.84
  -1   5   5    7.82    6.25
   1  -5  -5    5.37    2.31
   2  -5  -2  151.53   12.12
   2  -5  -2  144.47    9.88
  -2   5   2  126.71   11.84
  -2   5   2  130.37   21.36
  -1   6  -3   23.81    7.62
   1  -6   3   24.56   11.74
   1  -6   3   30.26   12.77
  -1   6  -3   25.30   11.54
   3   0  -7   18.61    8.18
   3   0  -7   20.78   11.30
  -3   0   7   10.49   11.72
   0  -4  -8   31.50   13.85
   0   4   8   34.27    9.27
   0   4   8   34.60    3.96
   0  -4  -8   37.60   14.93
   0   4   8   34.44   15.57
  -5  -2  -3  446.36   21.61
  -5  -2  -3  480.30   20.99
   5   2   3  529.67   25.19
   5   2   3  462.67   23.20
  -5  -2  -3  544.37   23.68
  -2   4  -7   71.44    9.46
   2  -4   7   78.64    6.00
   2  -4   7   72.48    9.99
  -2   4  -7   69.79   10.26
  -3  -3   7 1700.07   33.54
   3   3  -7 1521.94   31.85
  -3  -3   7 1122.89   21.97
   3   3  -7 1741.94   32.20
  -3  -3   7 1738.31   35.71
   3   3  -7 1356.06   25.42
  -4  -2   5 1570.59   26.96
  -4  -2   5 1789.71   35.38
   4   2  -5 1863.53   35.58
   4   2  -5 1415.79   31.35
  -4  -2   5 1745.39   30.05
  -1   2 -10 1894.06   37.97
   1  -2  10 1820.87   36.00
   1  -2  10 1812.78   36.49
  -1   2 -10 1793.83   34.61
  -4  -4   4  809.28   23.42
  -4  -4   4  825.68   21.61
   4   4  -4  902.44   24.06
   4   4  -4  704.80   22.30
  -4  -4   4  865.68   25.21
  -5  -1  -2   72.84    3.40
  -5  -1  -2   67.34    5.83
  -5  -1  -2   56.50    6.31
   5   1   2   56.35    6.96
  -5  -1  -2   64.99    7.60
   5   1   2   73.85    9.62
  -3   2  -8   40.14    8.53
   3  -2   8   38.65    7.79
   3  -2   8   42.29    5.05
   3  -2   8   39.09    4.96
  -3   2  -8   39.54   10.83
   2  -4  -5  144.18   13.14
  -2   4   5  147.20   10.79
   2  -4  -5  146.01   10.12
  -2   4   5  143.51    9.82
   2  -4  -5  140.02    7.60
   5   3   2  682.30   27.44
  -5  -3  -2  608.54   22.96
   5   3   2  563.54   17.64
  -5  -3  -2  703.40   18.73
  -5  -3  -2  668.41   18.17
  -3   4   1  723.12   21.79
   3  -4  -1  820.28   26.09
  -3   4   1  687.09   22.57
  -3   4   1  734.94   20.60
   3  -4  -1  742.04   21.33
  -1  -7   0 1533.25   28.27
   1   7   0 1617.15   30.51
   1   7   0 1803.66   37.10
  -1  -7   0 1439.19   27.71
  -1  -7   0 1468.59   34.02
   3  -3  -4   17.88    7.08
   3  -3  -4   24.85   16.67
  -3   3   4   22.67    8.30
  -3   3   4   18.54    8.12
   3  -3  -4   19.47    4.61
   5   3   1 2811.61   55.58
  -5  -3  -1 2263.32   42.02
  -5  -3  -1 2668.95   48.44
  -5  -3  -1 2764.05   48.35
   5   3   1 2149.12   39.73
  -5  -2   0 2114.58   41.43
   5   2   0 2687.54   50.82
  -5  -2   0 2370.23   41.61
  -5  -2   0 2576.90   45.26
   5   2   0 2053.32   38.07
  -5  -2   0 2527.00   46.63
   1  -2  -9   29.80    5.54
  -1   2   9   43.29   11.11
   1  -2  -9   33.02    6.36
  -1   2   9   32.18   14.91
   1  -2  -9   29.19   10.08
   5   1   1 1027.64   29.15
   5   1   1  858.66   23.35
  -5  -1  -1  834.74   24.10
  -5  -1  -1  925.57   24.34
  -5  -1  -1  883.48   22.92
  -5  -1  -1 1000.19   26.21
   3   4   8   22.49    7.67
  -3  -4  -8   32.96    8.31
   3   4   8   33.76   12.06
  -3  -4  -8   44.28   20.76
   3   4   8   27.26    2.87
  -2  -7   0    0.41    1.76
  -2  -7   0    1.93    4.28
   2   7   0    1.73    2.06
   2   7   0   -1.62    6.82
  -2  -7   0    8.46    7.81
   2   7   0    2.91    2.88
   1   7  -1 3522.12   65.93
  -1  -7   1 2987.15   52.80
  -2  -2 -10   53.31   10.89
   2   2  10   41.45   29.04
  -2  -2 -10   35.94    8.98
   2   2  10   46.72   12.37
   1  -4  -7  586.59   19.55
  -1   4   7  644.89   22.46
   1  -4  -7  611.23   18.51
  -4  -1   5  636.47   20.16
   4   1  -5  509.42   18.19
   4   1  -5  648.78   24.11
   2  -1  10   -2.31    6.95
   2  -1  10    5.83    4.82
  -2   1 -10    7.62   10.45
   3  -4   4  103.94    9.31
  -3   4  -4   95.96    9.80
  -3   4  -4   98.49   13.67
   3  -4   4   90.33    5.52
   3  -4   4   91.57    9.00
   2   7   1   12.96    8.38
  -2  -7  -1    9.67    4.66
   2   7   1    5.21    3.13
   2   7   1    9.42    3.45
  -2  -7  -1    2.96    7.24
  -2  -7  -1    8.92    4.00
   2   6  -5   48.34   19.67
   2   6  -5   50.79   15.64
  -2  -6   5   44.34    9.09
  -5  -1  -3  474.75   20.14
  -5  -1  -3  736.70   18.43
   5   1   3  615.58   18.88
  -5  -1  -3  594.69   24.98
   5   1   3  679.07   22.23
  -1  -7  -1  559.03   16.76
  -1  -7  -1  607.43   18.25
  -1  -7  -1  583.35   28.27
   1   7   1  673.03   22.72
   1   7   1  655.63   18.66
   1  -6  -2  171.12   10.24
  -1   6   2  173.43   10.38
  -1   6   2  176.01   11.30
   1  -6  -2  165.67   16.18
   4  -2   5  659.79   21.50
   4  -2   5  481.10    5.32
  -4   2  -5  646.70   16.54
  -4   2  -5  636.87   21.41
   4  -2   5  660.05   21.03
   5   3   3  292.78   16.57
  -5  -3  -3  303.78   15.06
   5   3   3  331.60   28.56
  -5  -3  -3  339.23   15.81
  -5  -3  -3  326.60   15.19
  -2  -1   9  973.98   28.71
  -2  -1   9  986.24   25.82
   2   1  -9  884.02   37.77
   2   1  -9  770.67   23.79
   2   1  -9  856.88   22.49
  -2  -7   1    0.60    3.35
   2   7  -1    0.23    1.28
   2   7  -1    3.66    5.61
  -2  -7   1    2.11    1.84
  -2  -7   1    4.42    6.33
   2   7  -1   -1.94    7.19
  -5  -3   0 2597.80   46.35
   5   3   0 2694.61   54.99
  -5  -3   0 2064.14   39.07
   5   3   0 2002.25   38.11
  -5  -3   0 2662.34   47.12
  -5  -3   0 2339.69   41.88
  -4  -5  -5 2751.71   46.58
   4   5   5 2729.24   51.41
  -4  -5  -5 3346.83   63.11
   4   5   5 3473.02   62.65
  -4  -5  -5 3278.93   55.26
   3  -1   9 1245.64   31.73
   3  -1   9 1207.60   31.25
  -3   1  -9 1301.26   35.77
  -3   1  -9 1304.39   36.19
   3  -1   9 1262.82   35.67
   1   1 -10  114.56   16.23
  -1  -1  10  149.39   10.18
   1   1 -10  139.42   11.70
  -1  -1  10  145.28   10.95
  -5  -1   0 2203.42   39.27
   5   1   0 1980.36   36.90
  -5  -1   0 2261.30   40.09
  -5  -1   0 2184.08   38.99
  -5  -1   0 1981.20   38.71
   5   1   0 2391.50   55.38
  -5  -2  -4 3588.54   60.34
  -5  -2  -4 3564.46   64.96
   5   2   4 3508.64   63.42
   5   2   4 3918.48   73.83
  -5  -2  -4 3523.32   59.00
   4   3  -5    2.62    4.18
  -4  -3   5    2.36    1.93
   4   3  -5   -0.69    6.38
  -4  -3   5   -0.54    7.09
  -4  -3   5    1.77    3.29
  -4  -3   5    1.68    2.03
  -4   2   2  533.42   21.87
  -4   2   2  546.10   16.93
   4  -2  -2  636.06   16.90
   4  -2  -2  668.67   24.65
  -4   2   2  593.62   16.19
   1   7  -2  263.73   12.40
   1   7  -2  401.81   19.97
  -1  -7   2  410.11   18.62
   1   7  -2  438.63   23.93
  -1  -7   2  391.24   28.09
   3   3   9  512.98   46.85
   3   3   9  441.05   24.20
   3   3   9  429.85   19.39
  -3  -3  -9  554.37   25.42
  -3  -3  -9  409.87   21.18
   4   5  -3 3826.41   77.81
   4   5  -3 2806.84   51.72
  -4  -5   3 3576.77   61.30
  -4  -5   3 3346.22   62.59
  -4  -5   3 3689.71   63.33
  -2  -7  -2 1100.44   22.99
   2   7   2 1516.76   34.53
  -2  -7  -2 1308.29   23.23
   2   7   2 1272.44   22.80
   1   0 -10  343.96   17.90
   1   0 -10  335.86   16.64
  -1   0  10  366.20   17.67
   1   0 -10  274.83   15.44
  -1   0  10  344.90   19.05
  -3  -5  -7  232.62   15.03
   3   5   7  234.45   15.09
   3   5   7  222.13   21.24
   3   6   5   43.28   22.27
  -3  -6  -5   52.77    7.12
   3   6   5   62.18   30.79
   2   2  -9  324.41   16.27
   2   2  -9  383.16   27.44
  -2  -2   9  309.20   14.55
   2   2  -9  350.49   16.66
  -2  -2   9  319.87   17.84
  -2  -2   9  409.91   20.02
  -1   6  -4  777.31   27.54
  -1   6  -4  723.15   23.14
  -1   6  -4  741.68   20.63
   1  -6   4  712.99   22.43
   1  -6   4  777.48   22.10
  -4  -1  -8   38.96    4.31
  -4  -1  -8   41.40    9.41
   4   1   8   48.46   21.82
  -4  -1  -8   45.66    6.74
   4   1   8   35.08    4.19
   2  -5   5 2752.60   51.86
  -2   5  -5 2754.70   52.46
   2  -5   5 2856.57   52.67
  -2   5  -5 2882.26   53.25
  -3   3  -7 1559.58   28.91
   3  -3   7 1537.26   28.05
   3  -3   7 1650.01   35.66
  -3   3  -7 1570.81   33.80
   3  -3   7 1585.91   33.15
   2   4  -8  166.31    5.67
  -2  -4   8  155.64    4.49
  -2  -4   8  164.53    7.44
  -2  -4   8  162.52   12.18
   2   4  -8  150.47   24.07
   0   2  10   92.24   48.81
   0  -2 -10  108.84   60.93
   0  -2 -10   93.49   14.35
   0   2  10  116.29   10.49
  -5  -2   1  494.20   21.69
  -5  -2   1  526.53   26.32
  -5  -2   1  527.01   23.51
  -5  -2   1  421.06   22.62
   5   2  -1  541.70   25.73
   5   2  -1  425.10   19.79
  -4  -2  -8 1173.55   31.97
   4   2   8 1149.67   38.85
  -4  -2  -8 1016.38   25.77
  -4  -2  -8 1115.88   37.39
   4   2   8 1105.72   28.54
  -1  -7  -2 1265.27   25.83
   1   7   2 1437.44   26.83
  -1  -7  -2 1355.04   25.05
  -1  -7  -2 1298.77   29.28
   1   7   2 1566.38   33.58
  -1   5  -7   39.81   12.59
   1  -5   7   39.29   21.08
   1  -5   7   42.27    8.38
  -1   5  -7   40.97   20.50
  -1   5  -7   35.66    9.08
   2   0  -9 1900.60   38.01
  -2   0   9 1990.62   35.66
  -2   0   9 2116.42   42.79
   2   0  -9 1598.00   35.33
   2   0  -9 1877.78   34.22
   5   1   4 3980.77   72.23
  -5  -1  -4 3513.61   67.20
   5   1   4 3643.67   65.88
   2   5  -7   -0.35    4.14
  -2  -5   7   -4.70    7.43
  -2  -5   7    1.38    5.09
   4  -1   7 2855.50   47.75
   4  -1   7 3228.87   59.16
  -4   1  -7 3220.73   59.12
   4  -1   7 3365.07   68.04
   2   7  -2   15.51    5.04
  -2  -7   2   15.93    5.79
   2   7  -2   21.60    8.99
  -2  -7   2    9.03    6.82
   2   7  -2   15.86    8.46
  -2  -7   2   11.05    6.21
   5   3   4 2045.82   36.15
  -5  -3  -4 1912.59   33.40
  -5  -3  -4 1823.25   34.87
   5   3   4 1725.77   34.51
  -5  -3  -4 1986.74   39.05
   0  -4   9  942.45   30.44
   0   4  -9  877.28   26.03
   0   4  -9  913.86   23.88
   0  -4   9  968.21   31.34
   0   4  -9  950.86   31.26
  -4  -6  -1  913.31   26.74
  -4  -6  -1 1120.93   29.58
   4   6   1  912.36   26.11
  -4  -6  -1 1108.17   28.30
  -4  -6  -1 1100.97   28.94
   4   6   1 1208.62   33.80
   2  -5  -3  280.51   16.40
   2  -5  -3  252.83   13.73
  -2   5   3  286.63   19.50
  -2   5   3  246.71   14.71
   3  -4  -2 3835.56   67.20
   3  -4  -2 4185.50   80.07
  -3   4   2 3732.02   65.43
  -3   4   2 3694.56   66.03
  -3   4   2 3517.43   65.13
   0  -5  -7  129.58   10.27
   0   5   7  125.80    5.81
   0   5   7  137.60   12.68
   0   5   7  129.09   10.65
   1   6  -6 1521.96   32.70
   1   6  -6 1595.36   33.73
  -1  -6   6 1523.54   33.87
  -2  -6  -6 2300.65   45.59
   2   6   6 2300.32   50.31
   2   6   6 2595.83   49.13
  -4   1   4    3.37    7.07
   4  -1  -4   13.98    6.62
  -4   1   4    8.43    7.97
   2  -2  -8  667.18   25.40
  -2   2   8  736.77   27.03
  -2   2   8  639.23   18.65
   2  -2  -8  692.10   18.68
   2  -2  -8  632.87   22.73
   2  -3  -7  238.68   14.40
  -2   3   7  276.00   17.27
   2  -3  -7  248.13   15.87
   2  -3  -7  247.42   12.23
   2  -3  -7  245.53   14.59
   1   2 -10 3871.30   72.74
  -1  -2  10 3840.37   70.15
   1   2 -10 2759.81   49.19
  -1  -2  10 3977.64   70.06
   3   6  -4   82.52   18.25
   3   6  -4   72.20   17.61
  -3  -6   4   82.18   10.67
  -5  -3   1   68.48    4.93
   5   3  -1   60.52    5.51
  -5  -3   1   79.64    8.02
  -5  -3   1   59.39    9.81
   5   3  -1   75.76    7.87
   2   4   9 2354.49   45.28
   2   4   9 2458.97   47.16
  -2  -4  -9 2553.68   49.32
  -2  -4  -9 2492.77   43.73
   3  -2  -6 1912.21   46.15
   3  -2  -6 1995.97   34.11
   3  -2  -6 1980.63   33.86
   3  -2  -6 2111.60   43.13
  -3   2   6 2092.48   41.41
  -4  -6  -2 3706.52   62.93
   4   6   2 4086.02   77.53
  -4  -6  -2 3744.82   65.89
  -4  -6  -2 2985.94   54.97
  -4  -6  -2 3184.51   54.67
  -4  -6   0  894.36   23.57
  -4  -6   0  884.27   23.19
  -4  -6   0  783.63   23.50
   4   6   0  954.02   28.21
  -4  -6   0  924.80   24.75
   4   6   0  715.74   19.73
   1   4   9  563.23   19.74
  -1  -4  -9  508.86   18.26
  -1  -4  -9  577.24   16.67
   1   4   9  544.22   24.48
   1   4   9  573.85   18.66
  -5   0  -2 2454.72   47.05
  -5   0  -2 2104.02   36.23
   5   0   2 2855.59   53.83
   5   0   2 2646.93   48.23
  -5   0  -2 2670.66   45.55
  -4   0   5  232.99   13.95
   4   0  -5  156.34   20.30
   4   0  -5  247.14   14.58
  -5  -4  -2 1302.57   33.70
  -5  -4  -2 1285.48   34.57
   5   4   2  947.53   26.51
   5   4   2 1331.20   34.55
  -5  -4  -2 1103.05   29.38
  -5  -4  -1 1513.41   28.99
   5   4   1 1542.17   31.57
  -5  -4  -1 1257.60   25.15
   5   4   1 1164.26   26.72
   3  -4   5  611.36   27.35
   3  -4   5  662.17   21.68
  -3   4  -5  596.26   20.27
   3  -4   5  599.43   17.06
  -3   4  -5  624.02   30.66
   5   1  -1  757.30   20.01
  -5  -1   1  883.51   25.68
  -5  -1   1  903.65   23.20
   5   1  -1  966.12   28.60
  -5  -1   1  740.82   22.22
   4   4   7   24.41    9.46
   4   4   7   30.08   13.39
   4   4   7   41.67    9.82
  -4  -4  -7   29.58    3.69
  -4  -4  -7   36.71   17.51
  -4  -4  -7   37.41    7.81
   0   6   5  101.01   10.76
   0   6   5  103.40   17.73
   0  -6  -5  104.09   18.92
   0  -6  -5  102.23    9.44
   0   6   5   96.83    6.05
  -5   0  -1   35.54    4.72
   5   0   1   39.01    4.16
   5   0   1   46.55   13.81
  -5   0  -1   38.27    8.56
   5   0   1   42.39    9.38
  -5   0  -1   33.91    6.39
   2  -3   9  196.41   11.45
  -2   3  -9  200.34   12.19
  -2   3  -9  190.05   12.47
   2  -3   9  195.56    9.01
   1   6   6  808.53   24.78
   1   6   6  769.29   20.08
   1   6   6  764.55   19.81
  -1  -6  -6  744.91   23.29
  -1  -6  -6  793.31   24.37
   3  -1  -7   92.09   20.78
   3  -1  -7   93.66    8.60
  -3   1   7   99.34    9.35
  -1  -7   3  307.66   14.38
   1   7  -3  195.33    9.64
   1   7  -3  293.23   22.86
  -1  -7   3  283.78   16.80
   1   7  -3  327.89   20.85
  -4   0  -8    7.61    8.17
   4   0   8   13.48   13.93
   4   0   8    8.02    1.62
   4   0   8    7.30    2.36
  -4   0  -8    5.19    8.11
  -5   0  -3  547.65   25.98
  -5   0  -3  523.74   22.10
   5   0   3  606.59   28.87
   5   0   3  581.57   18.21
  -1   6   3 2710.70   55.28
  -1   6   3 2894.99   54.61
   1  -6  -3 2566.90   49.52
   1  -6  -3 2678.28   50.56
  -2  -7  -3  641.20   16.15
  -2  -7  -3  649.49   21.81
  -2  -7  -3  519.19   16.83
   2   7   3  772.00   24.77
   2   7   3  642.44   16.15
  -5  -2  -5 3440.29   61.76
  -5  -2  -5 3636.54   66.98
   5   2   5 3293.99   65.28
   0   6  -6 1427.40   29.65
   0  -6   6 1366.35   10.67
   0   6  -6 1293.02   32.48
   0  -6   6 1312.78   37.04
   0   6  -6 1358.68   18.96
   0   3 -10   50.75    8.35
   0   3 -10   67.65   15.79
   0  -3  10   69.42   12.53
   0  -3  10   57.73    9.13
   0   3 -10   57.41    6.59
   0  -7   1 1145.35   30.50
   0  -7   1 1082.76   31.37
   0   7  -1 1244.61   35.84
   0   7  -1 1137.83   31.38
   0   7   0   66.08    9.98
   0   7   0   72.25   10.24
   0  -7   0   73.57   17.67
   0  -7   0   62.01    6.92
  -1  -4   9 3191.09   60.01
  -1  -4   9 3168.58   61.15
   1   4  -9 3185.85   59.98
   1   4  -9 2007.81   35.15
   1   4  -9 3048.33   52.22
  -5  -4  -3    1.95    3.31
  -5  -4  -3    4.30    5.60
   5   4   3    2.74    3.38
   5   4   3    1.18    4.91
  -5  -4  -3    3.01    3.14
  -5  -4  -3    8.40    4.20
   2   5   8  156.79    6.32
  -2  -5  -8  151.51    7.89
   2   5   8  169.77   11.82
   2   5   8  157.41   23.71
  -2  -5  -8  165.68   21.74
  -3  -4   7 1231.97   22.28
   3   4  -7 1402.11   26.40
   3   4  -7 1773.06   31.32
  -3  -4   7 1728.52   36.00
  -3  -4   7 1779.02   36.62
   3   4  -7 1547.11   32.04
  -5  -4   0  744.50   21.02
   5   4   0  725.74   21.87
   5   4   0  608.06   18.04
  -5  -4   0  586.89   18.01
  -1  -3 -10   80.88    5.80
   1   3  10   82.34    8.63
   1   3  10   75.40    9.81
  -1  -3 -10   78.58   12.73
  -1   0 -11 2814.55   60.75
   1   0  11 3020.01   58.99
  -1   0 -11 3065.68   57.99
   1   0  11 2829.55   61.86
  -3  -5   6 1632.91   31.54
  -3  -5   6 1695.77   35.70
  -3  -5   6 1563.27   26.30
   3   5  -6 1486.25   39.26
  -3  -5   6 1454.74   24.57
   4  -2   6 2560.23   48.76
   4  -2   6 2599.69   44.18
   4  -2   6 2710.38   53.56
   4  -2   6 2115.09   36.24
  -4   2  -6 2558.66   51.04
  -1   1  10  277.70   15.58
   1  -1 -10  228.50   14.28
   1  -1 -10  262.33   12.96
  -1   1  10  272.26   30.53
   1  -1 -10  270.26   16.43
   0   5  -8  269.32   18.01
   0   5  -8  264.14   13.95
   0   5  -8  273.34   18.51
   0   5  -8  263.25   12.49
   0  -5   8  300.47   30.07
   4   6   3 1438.98   18.35
  -4  -6  -3 1177.95   32.57
  -4  -6  -3 1334.24    7.75
   4   6   3 1065.80   28.19
  -4  -6  -3 1242.77   21.88
  -4  -6   1  590.16   25.75
  -4  -6   1  592.56   26.84
   4   6  -1  447.37    9.40
  -4  -6   1  608.21   17.17
   4   6  -1  629.58   29.80
  -4  -6   1  531.35   17.12
   4   3   8  161.38    9.89
  -4  -3  -8  127.97    5.12
  -4  -3  -8  160.90   10.89
   4   3   8  122.35    5.95
  -4  -3  -8  158.15    7.34
   4   3   8  161.48   30.67
  -4   3  -2 2232.85   45.35
   4  -3   2 2440.02   45.35
   4  -3   2 1780.74   32.40
   4  -3   2 2552.27   49.52
  -4   3  -2 2413.07   45.23
  -1  -7  -3 1877.16   37.84
  -1  -7  -3 1988.18   35.23
   1   7   3 2385.70   46.86
   1   7   3 2146.59   37.99
  -1  -7  -3 1969.00   38.27
   5   0   0 1545.73   28.64
  -5   0   0 1384.45   29.48
   5   0   0 1591.79   29.80
  -5   0   0 1447.30   26.97
  -5   0   0 1604.31   29.72
   5   0   0 1783.81   36.88
  -4   3  -1  793.04   32.83
   4  -3   1  900.64   27.78
   4  -3   1  833.88   23.46
   4  -3   1  659.79   18.24
  -4   3  -1  807.54   23.27
   5   1   5  341.73   18.54
  -5  -1  -5  332.70   17.48
   5   1   5  329.37   19.03
   1   5  -8  580.53   24.65
  -1  -5   8  551.77   26.72
  -1  -5   8  595.45   29.04
   1   5  -8  557.68   27.08
  -2  -3 -10 2097.83   38.01
   2   3  10 1752.12   35.67
  -2  -3 -10 1987.29   40.20
   2   3  10 1942.14   39.20
  -3  -7  -1    1.23    2.10
  -3  -7  -1    4.18    7.08
   3   7   1    1.57    2.69
  -3  -7  -1   -0.51    3.01
   3   7   1    2.01    3.11
   3   7   1    3.68    3.34
   3   7   0  943.50   25.06
  -3  -7   0  837.75   25.71
   3   7   0  819.20   21.65
  -3  -7   0  965.31   24.89
   3   7   0 1040.96   41.16
  -3  -7   0  816.91   21.96
  -3  -1 -10  125.82    5.75
  -3  -1 -10  131.55    9.73
   3   1  10  134.60   11.82
  -3  -1 -10  139.44   19.14
   3   1  10  119.25    7.75
  -2   2 -10 1200.38   33.09
   2  -2  10 1231.95   35.34
   2  -2  10 1193.30   33.36
  -2   2 -10 1236.25   38.89
  -2  -3   9   22.58    9.70
   2   3  -9   23.03    8.93
  -2  -3   9   20.06    5.01
  -2  -3   9   11.24   10.74
   2   3  -9   27.79   12.64
   1   5   8    3.18    5.42
  -1  -5  -8   -1.42    4.27
   1   5   8    1.00    4.32
   1   5   8    1.27    1.99
  -1  -5  -8    1.33    2.05
   2   7  -3  138.08   10.91
   2   7  -3  128.86   13.40
  -2  -7   3  124.36   11.00
  -2  -7   3  126.92    3.90
   2   7  -3  121.63    5.14
  -5  -2   2  138.63    5.43
   5   2  -2  156.89    9.49
  -5  -2   2  110.64    9.63
  -5  -2   2  147.68    7.70
   0  -7   2  925.55   28.26
   0   7  -2  923.98   26.85
   0   7  -2  993.57   39.63
   0  -7   2  986.70   26.39
   0   7  -2  734.44   20.13
   1  -5  -6 1027.55   28.60
  -1   5   6 1108.71   33.07
  -1   5   6 1065.64   29.73
   1  -5  -6 1053.25   39.11
   0   7   1   19.55   14.88
   0  -7  -1   14.86    6.48
   0  -7  -1   20.30    8.57
   0   7   1   20.21    5.91
  -4  -4   5   71.88   12.25
   4   4  -5   53.28   10.83
  -4  -4   5   37.31    8.74
   4   4  -5   61.83    5.57
  -4  -4   5   58.54    4.76
  -4  -4   5   52.48    4.06
   3   1  -8   37.63   12.80
   3   1  -8   33.80    8.85
   3   1  -8   30.55    3.64
  -3  -1   8   39.38   15.58
  -3  -1   8   34.29    5.05
   4   5   6 1437.98   29.08
   4   5   6 1156.55   27.99
  -4  -5  -6 1396.49   24.19
  -4  -5  -6 1405.15   31.58
  -4  -5  -6 1083.31   26.54
   1  -6   5 1634.36   31.85
  -1   6  -5 1668.19   33.85
  -1   6  -5 1576.41   29.54
  -1   6  -5 1544.42   31.93
   1  -6   5 1507.78   32.91
  -3  -2   8   17.43    7.72
   3   2  -8   17.77    9.81
   3   2  -8   11.78    7.94
   3   2  -8   13.39    5.16
  -3  -2   8   14.77    8.92
  -3  -2   8   12.14    4.76
  -5  -3  -5 2787.89   48.42
   5   3   5 2968.18   55.28
   5   3   5 3541.90   60.34
  -5  -3  -5 3399.66   68.55
  -5  -3  -5 3174.18   57.76
  -4   2   3  339.04   24.19
  -4   2   3  358.74   15.90
   4  -2  -3  424.89   29.24
   4  -2  -3  387.67   17.07
  -4   2   3  336.57   19.50
   4  -3   3  457.08   20.90
  -4   3  -3  615.20   27.09
  -4   3  -3  593.29   21.43
   4  -3   3  605.87   19.23
   4  -3   3  639.05   16.27
  -1  -1 -11 1704.52   36.70
   1   1  11 1636.93   33.16
  -1  -1 -11 1519.11   35.46
   1   1  11 1580.60   33.81
  -5   0  -4   22.90    9.13
   5   0   4   21.98    9.47
   5   0   4   22.71    6.89
   1  -4   9  511.41   25.73
  -1   4  -9  507.61   22.83
  -1   4  -9  509.30   24.26
   1  -4   9  518.77   25.08
  -1   4  -9  442.66   23.60
   3  -3  -5  876.35   22.89
  -3   3   5  930.47   27.72
   3  -3  -5  927.98   24.31
  -3   3   5  870.56   27.05
   3  -3  -5  989.74   29.15
  -1   3 -10 1066.69   28.96
  -1   3 -10 1098.75   31.59
   1  -3  10 1091.09   31.99
   1  -3  10 1082.70   35.98
   1  -1  11 6072.30  106.86
   1  -1  11 5822.64  102.36
  -1   1 -11 5762.05   35.29
  -1   1 -11 6142.52   39.38
   2  -4   8  531.07   27.45
   2  -4   8  499.54   25.64
  -2   4  -8  494.57   24.90
  -2   4  -8  481.96   24.79
   3   7   2 1210.44   34.51
  -3  -7  -2  919.56   27.49
  -3  -7  -2 1004.29   27.19
   3   7   2  886.27   22.01
  -3  -7  -2 1087.47   26.79
  -2   1   9 3491.31   60.48
  -2   1   9 3829.72   72.42
   2  -1  -9 3567.39   62.05
   2  -1  -9 3505.96   64.31
   2  -1  -9 3078.06   58.48
   3   0  10 1125.31   40.55
   3   0  10 1003.26   26.60
  -3   0 -10 1001.69   26.70
  -3   0 -10 1082.58   31.07
  -3   0 -10 1145.06   32.48
  -4   3   0   63.08    6.78
  -4   3   0   69.23   10.06
   4  -3   0   85.23   11.45
  -4   3   0   67.29    5.39
   4  -3   0   70.50    7.76
  -3  -7   1 1781.38   32.39
   3   7  -1 1883.98   37.83
  -3  -7   1 1579.35   34.04
  -3  -7   1 1367.91   25.37
   3   7  -1 1546.25   29.39
  -2  -6   6   57.44   23.08
   2   6  -6   63.37    9.90
   2   6  -6   63.20   21.07
  -5  -3   2  344.76   15.73
  -5  -3   2  324.45   15.30
   5   3  -2  373.85   19.99
  -5  -3   2  392.72   21.61
   5   3  -2  300.65   16.86
   0   0 -11 1995.98   41.25
   0   0 -11 1653.84   35.62
   0   0  11 1985.61   37.70
   0   0  11 1906.39   38.33
   4   5  -4  133.46    8.21
  -4  -5   4  123.55    7.10
   4   5  -4  104.03    8.42
  -4  -5   4  113.69    4.74
  -4  -5   4  131.45   11.43
   2  -5   6  475.69   26.24
  -2   5  -6  472.31   23.81
   2  -5   6  485.54   22.50
  -2   5  -6  475.93   22.84
  -2   4   6  388.44   27.65
  -2   4   6  389.11   20.83
   2  -4  -6  390.95   18.29
   2  -4  -6  391.70   26.87
   2  -4  -6  360.64   17.31
  -5  -4  -4 1166.78   32.53
   5   4   4  978.44   28.58
  -5  -4  -4  865.35   23.35
  -5  -4  -4 1123.74   28.73
   5   4   4 1258.64   32.45
  -5  -4  -4 1063.75   29.69
   4   2  -6 1242.19   34.01
  -4  -2   6 1209.27   34.21
  -4  -2   6 1184.98   28.82
  -4  -2   6  994.87   24.30
   4   2  -6  979.00   29.44
   3   2  10    7.07    6.11
  -3  -2 -10    2.01    7.58
   3   2  10   -1.71    8.46
  -3  -2 -10    2.69    4.16
   5   4  -1   56.24    9.79
  -5  -4   1   59.01    9.01
   5   4  -1   38.40   10.28
  -5  -4   1   39.16    7.77
  -5  -4   1   52.24    7.63
   0   1 -11  334.05   19.73
   0   1 -11  273.85   16.63
   0  -1  11  344.68   25.78
   0  -1  11  326.97   18.42
  -3   4   3  676.69   20.05
   3  -4  -3  715.67   20.47
  -3   4   3  681.86   22.04
   3  -4  -3  769.24   25.30
  -3   4   3  652.44   21.46
   3   6   6  169.24   12.32
   3   6   6  138.47   10.26
  -3  -6  -6  177.48   20.28
  -5  -1   2  124.15   17.38
  -5  -1   2  138.08    7.49
   5   1  -2  118.39    6.56
  -5  -1   2  145.15    6.84
   5   1  -2  154.85   14.59
   3  -2   9 3083.93   54.16
   3  -2   9 3119.44   59.22
  -3   2  -9 3169.67   58.52
   3  -2   9 3017.81   53.13
  -3   2  -9 3178.97   63.81
  -4  -6  -4   92.27    9.10
   4   6   4   99.49    9.71
  -4  -6  -4   93.43    2.34
  -4  -6  -4   84.36    2.35
   4   6   4   77.94   15.54
  -4  -1   6  664.34   21.56
   4   1  -6  664.45   22.65
   4   1  -6  567.98   19.28
  -4  -6   2   28.56    5.29
  -4  -6   2   24.72   11.12
   4   6  -2   31.21   12.91
  -4  -6   2   29.71   13.65
   4   6  -2   20.77   11.07
  -1  -7   4  538.69   23.32
   1   7  -4  524.87   30.43
   1   7  -4  547.98   28.59
  -1  -7   4  515.72   27.24
   1   7  -4  338.76   15.46
   5   0  -1 1581.41   29.93
  -5   0   1 1337.86   29.55
  -5   0   1 1462.19   27.83
   5   0  -1 1741.72   35.50
  -5   0   1 1577.27   28.39
   5   0  -1 1451.68   27.12
   0   7  -3  291.42   14.18
   0   7  -3  354.77   18.71
   0  -7   3  357.97   20.39
   0   7  -3  364.16   20.42
   0  -7   3  366.01   17.18
  -2  -7  -4   77.78   15.90
  -2  -7  -4   71.38    9.41
   2   7   4   86.67   24.87
   2  -5  -4  463.33   23.70
  -2   5   4  430.76   22.12
   2  -5  -4  433.69   21.93
  -2   5   4  488.52   24.97
  -1  -3  10 1524.84   33.51
  -1  -3  10 1505.03   30.89
   1   3 -10 1023.66   20.43
   1   3 -10 1525.63   43.16
   0   7   2  559.81   31.86
   0  -7  -2  478.11   23.22
   0  -7  -2  474.08   23.38
   0   7   2  521.49   24.07
   4  -3   4   20.82    7.61
  -4   3  -4   29.74   10.85
   4  -3   4   30.10    8.03
  -4   3  -4   31.54   11.46
   4  -3   4   16.52    2.95
   1  -3  -9   53.95   23.86
  -1   3   9   49.95   10.00
   1  -3  -9   55.63    7.38
  -1   3   9   59.99   12.71
   1  -3  -9   46.64    4.13
   3  -4   6  460.67   23.55
  -3   4  -6  424.43   26.44
   3  -4   6  470.26   23.78
   3  -4   6  434.41   19.67
  -3   4  -6  457.00   22.36
   2   0  11  300.92   18.11
  -2   0 -11  288.23   15.65
  -2   0 -11  293.02   20.81
   2   0  11  272.30   16.24
   2   1  11   33.73    7.40
   2   1  11   37.10   21.62
  -2  -1 -11   35.42   10.86
  -2  -1 -11   34.41    7.16
   3   0  -8  202.26   15.04
  -3   0   8  220.05   14.62
  -3   0   8  174.55    8.60
   3   0  -8  189.36    2.89
   3   0  -8  197.58   15.33
  -3  -4  -9  531.78   26.40
   3   4   9  458.81   20.68
  -3  -4  -9  548.72   24.62
   3   4   9  445.32   21.80
   3   4   9  504.89   25.60
   3   7   3  345.70   20.88
  -3  -7  -3  280.02   17.70
  -3  -7  -3  251.43   13.49
  -5  -2  -6  108.15   11.70
  -5  -2  -6  134.30   28.24
   5   2   6   99.96    9.19
   3   3  -8  491.95   22.88
  -3  -3   8  624.67   36.35
   3   3  -8  598.87    9.94
  -3  -3   8  394.62   17.87
   3   3  -8  541.54   33.70
  -3  -3   8  590.52    9.13
  -4  -3   6 1312.75   19.11
  -4  -3   6 1255.15   31.79
  -4  -3   6 1136.47   29.50
   4   3  -6 1070.25   17.41
   4   3  -6 1319.53   34.56
   0  -4  -9  730.57   20.96
   0   4   9  743.50   24.70
   0   4   9  717.94   22.66
   0  -4  -9  681.65   21.35
   3  -3   8  318.57   14.92
   3  -3   8  341.86   16.37
   3  -3   8  336.70   19.07
   3  -3   8  349.83   18.38
  -3   3  -8  335.85   19.37
   3   6  -5  926.44   26.47
   3   6  -5 1087.36   43.20
  -3  -6   5  989.57   27.81
   0  -1 -11 1160.03   32.98
   0   1  11 1085.14   31.91
   0   1  11 1137.12   38.60
   0  -1 -11  928.53   27.33
  -3  -7   2  213.98    5.98
   3   7  -2  235.05   18.37
  -3  -7   2  153.25    4.83
  -3  -7   2  203.56   13.53
   3   7  -2  190.65   11.04
   1  -6  -4 2462.96   51.20
  -1   6   4 2680.55   52.18
  -1   6   4 2487.93   46.07
   1  -6  -4 2414.75   45.96
   4  -3  -1  200.02   12.05
   4  -3  -1  179.42   10.08
  -4   3   1  158.45   14.62
  -4   3   1  178.28    6.89
  -4   3   1  157.93    9.74
  -5   0  -5   26.12   12.75
   5   0   5   16.39    8.00
   5   0   5   15.50   15.71
  -1   4   8   32.80   13.69
   1  -4  -8   16.21    7.87
   1  -4  -8   26.83   11.12
   4  -1   8  510.79   21.94
  -4   1  -8  581.88   28.60
   4  -1   8  551.56   26.91
  -4   1  -8  575.22   28.96
   4  -1   8  540.27   23.25
   1   7   4 2117.12   42.20
   1   7   4 1938.12   34.37
   1   7   4 1788.40   32.46
  -1  -7  -4 1831.09   35.93
  -1  -7  -4 1776.86   36.10
  -3  -5  -8  172.86    4.21
   3   5   8  175.42    9.69
   3   5   8  186.83   18.42
   3   5   8  157.58    5.34
  -3  -5  -8  208.21   30.01
   0  -3 -10  239.48   14.66
   0   3  10  291.99   30.02
   0   3  10  280.56   14.84
   0  -3 -10  273.77   15.31
   5   1   6  352.80   21.38
   5   1   6  331.38   18.89
  -5  -1  -6  324.57   16.85
   4  -1  -5  515.87   25.51
  -4   1   5  475.49   23.55
  -4   1   5  422.75   22.52
   2   7  -4   30.28   14.42
  -2  -7   4   27.56    9.79
   2   7  -4   30.66   11.08
   4   1   9    5.91    5.83
  -4  -1  -9    1.64    2.09
  -4  -1  -9    6.74    8.12
   4   1   9    2.13    1.98
  -4  -1  -9    3.39    3.19
  -1   5  -8  401.81   19.01
  -1   5  -8  381.42   20.45
   1  -5   8  398.49   22.21
  -1   5  -8  412.46   21.39
  -1   5  -8  392.67   20.91
   1   2  11  403.05   21.32
  -1  -2 -11  408.72   23.67
   1   2  11  403.74   20.96
  -1  -2 -11  437.28   21.06
   2   6   7 2410.66   47.50
  -2  -6  -7 2310.72   44.35
  -1  -6   7    3.42    7.59
   1   6  -7    2.71    7.90
   1   6  -7    8.84    6.14
  -5   1  -2 1186.55   30.42
  -5   1  -2 1208.85   28.97
   5  -1   2 1312.40   28.46
   5  -1   2 1414.41   19.55
   5  -1   2 1257.15   31.39
   4   2   9   58.63    6.47
  -4  -2  -9   77.65   13.59
  -4  -2  -9   70.80   11.17
   4   2   9   82.91   11.86
  -4  -2  -9   55.04    8.03
  -2   6  -1 2547.89   48.63
   2  -6   1 2620.39   55.45
  -2   6  -1 2812.08   52.44
   2  -6   1 2808.47   55.15
   0  -2  11  142.08   18.36
   0   2 -11  134.03   12.97
   0   2 -11  118.08   10.58
   0  -2  11  122.74    9.76
  -5  -4  -5 2683.15   50.50
  -5  -4  -5 2357.29   41.52
  -5  -4  -5 2481.31   45.88
   5   4   5 2271.35   47.61
   5   4   5 2802.31   52.52
   5   5   1  310.53   17.01
   5   5   1  439.40   24.60
  -5  -5  -1  347.39   19.55
  -5  -5  -1  318.68   15.10
  -5  -3  -6  210.29   13.76
   5   3   6  187.98   10.36
  -5  -3  -6  191.86    8.72
  -5  -3  -6  147.39    6.01
   5   3   6  207.62    8.49
   5   2  -3 1038.63   30.12
  -5  -2   3  937.78   24.46
  -5  -2   3  964.41   24.15
  -5  -2   3  974.78   28.84
   5   2  -3  773.41   29.44
  -5  -5  -2   66.69   12.37
  -5  -5  -2   54.99    4.19
   5   5   2   72.68   15.45
  -5  -5  -2   62.72    5.01
   5   5   2   45.30    8.09
   0   6   6  165.49   11.60
   0   6   6  173.95    7.83
   0   6   6  167.16    8.77
   0  -6  -6  188.52   26.03
   0  -6  -6  160.15   10.35
   4  -2   7 1484.94   32.59
   4  -2   7 1569.29   34.62
  -4   2  -7 1492.50   32.35
   4  -2   7 1470.07   26.05
   4  -2   7 1358.81   24.14
   3  -1  10 2145.70   38.93
   3  -1  10 2301.76   46.33
  -3   1 -10 2278.35   44.04
  -3   1 -10 2249.84   47.24
   5   4  -2  100.96    8.17
   5   4  -2   59.46   12.62
  -5  -4   2   77.33    5.63
  -5  -4   2   87.02   12.08
  -5  -4   2   91.07   12.07
  -5   1  -1   24.81    9.64
  -5   1  -1   23.28    8.51
   5  -1   1   24.30    7.09
   5  -1   1   30.27    6.23
  -5   1  -1   25.43    8.59
   5  -1   1   24.48    9.09
   2  -6   2  449.13   22.30
  -2   6  -2  456.59   27.10
  -2   6  -2  411.80   22.06
   2  -6   2  397.06   20.84
  -1   2 -11 1452.97   33.33
   1  -2  11 1391.59   31.31
   1  -2  11 1389.83   30.07
  -1   2 -11 1288.49   22.21
  -4  -4  -8   86.60   15.22
   4   4   8   82.45   11.70
  -4  -4  -8   68.36   10.11
   4   4   8   91.34    7.90
  -4  -4  -8   97.50    5.02
   4   4   8   72.37    4.05
   5  -1   3 1406.81   28.31
   5  -1   3 1415.51   38.13
  -5   1  -3 1376.20   31.27
   5  -1   3 1418.59   24.70
   1  -2 -10   79.79    5.48
  -1   2  10   78.63    6.75
  -1   2  10   89.43   12.39
   1  -2 -10   71.20    7.82
   1  -2 -10   75.65    8.32
   2  -1  11  667.14   30.12
  -2   1 -11  722.22   46.80
  -2   1 -11  668.08   21.69
   2  -1  11  643.46   20.29
   2  -6   0 3193.59   59.13
  -2   6   0 3072.39   57.10
  -2   6   0 3430.88   63.18
   2  -6   0 3388.36   63.28
   2   5  -8  263.16   16.59
  -2  -5   8  250.11   14.72
  -2  -5   8  280.56   19.27
   0   6  -7    0.96    2.32
   0  -6   7    5.59    4.82
   0   6  -7    3.07    5.27
   0   6  -7    0.68    2.98
   0   6  -7    3.09    4.07
   1  -6   6  107.31    6.76
  -1   6  -6  110.77    5.95
  -1   6  -6  105.81   10.96
  -1   6  -6  108.59   11.50
   1  -6   6  108.51   10.08
  -2  -2 -11    3.08    4.45
  -2  -2 -11    3.03    4.77
   2   2  11    2.38    9.12
   2   2  11    5.86    4.85
   4  -3   5 1199.14   33.77
  -4   3  -5 1217.73   32.60
  -4   3  -5 1151.78   33.11
   4  -3   5 1289.86   47.55
   4  -3   5  987.11   25.24
   0   7  -4 1650.10   34.25
   0   7  -4 1382.70   25.76
   0  -7   4 1719.98   31.65
   0   7  -4 1806.61   38.56
  -3  -3 -10  420.70   23.57
   3   3  10  368.33   17.10
   3   3  10  416.81   25.49
   3   3  10  376.07   23.44
  -3  -3 -10  432.32   19.97
  -5  -3   3  762.31   20.70
   5   3  -3  838.71   24.60
  -5  -3   3  751.55   19.82
  -5  -3   3  809.20   23.25
   5   3  -3  641.97   23.24
  -4   0   6   92.06    9.18
   4   0  -6   72.25   17.40
   4   0  -6   95.05   17.19
   5   5   0    1.43    2.50
   5   5   0   -0.39    5.65
  -5  -5   0   -1.25    3.91
  -5  -5   0    3.65    3.36
   1   6   7 3235.63   56.20
   1   6   7 3383.58   58.18
  -1  -6  -7 3286.20   61.93
   1   6   7 3376.66   69.11
   1   6   7 3645.12   67.65
   0  -7  -3  161.28   21.37
   0   7   3  163.92   10.29
   0  -7  -3  163.64    6.86
   0   7   3  199.54   11.94
   0  -7  -3  163.77   13.06
  -5  -5  -3   38.35    6.51
   5   5   3   47.69    6.63
   5   5   3   32.66   17.31
  -5  -5  -3   28.23    6.19
  -5  -5  -3   36.10    4.32
   5   0  -2  525.46   25.58
  -5   0   2  496.42   21.38
   5   0  -2  430.30   18.71
  -5   0   2  479.94   22.42
  -5   0   2  414.33   22.33
   0   5   8   40.98   10.36
   0   5   8   36.05    4.42
   0   5   8   35.56    6.91
   0  -5  -8   51.30   27.81
   0   5   8   53.33   25.58
   4   6   5 1297.17   28.95
  -4  -6  -5 1595.75   33.33
   4   6   5 1714.60   34.50
   4  -2  -4  179.59    4.77
   4  -2  -4  195.73   11.59
  -4   2   4  150.07   10.46
   4  -2  -4  160.23    6.05
  -4   2   4  160.82   10.26
  -3   5  -1  408.09   20.07
  -3   5  -1  387.63   20.94
   3  -5   1  393.89   19.97
   3  -5   1  429.35   22.69
  -3   5  -2  132.47   18.99
  -3   5  -2  131.01   10.37
   3  -5   2  135.62   10.56
   3  -5   2  146.27    9.95
  -4  -6   3 1097.63   28.45
  -4  -6   3 1084.39   27.23
   4   6  -3 1154.22   40.38
  -4  -6   3 1031.68   28.52
   4   6  -3  889.43   25.46
  -3  -7  -4  137.52   10.87
   3   7   4  171.18   10.82
  -3  -7  -4  150.08    9.78
   4   5   7  617.26   19.60
  -4  -5  -7  594.85   25.29
  -4  -5  -7  586.02   20.19
  -4  -5  -7  444.99   19.27
   4   5   7  496.65   13.80
   2   4  -9    4.42    7.87
  -2  -4   9    6.41    4.55
  -2  -4   9    2.78    2.41
   2   4  -9    3.64    2.72
  -2  -4   9    3.73    4.51
   3  -2  -7   28.13    3.55
   3  -2  -7   26.28   16.53
  -3   2   7   39.96    9.24
   3  -2  -7   30.66   10.31
   3  -2  -7   27.09    6.46
   2   1 -10  171.74   11.49
   2   1 -10  130.41   13.98
  -2  -1  10  129.66   19.50
   2   1 -10  139.81    5.38
  -2  -1  10  161.45   10.86
  -5  -1   3   81.88    9.54
  -5  -1   3   92.95    3.69
  -5  -1   3   86.70    3.11
   5   1  -3  104.97    9.02
  -5  -1   3   73.77   10.96
   2  -6   3  267.55   25.45
  -2   6  -3  300.10   17.62
   2  -6   3  287.42   18.73
  -2   6  -3  274.82   18.06
   4   0   9    5.93    6.99
  -4   0  -9    3.05    6.20
   4   0   9    0.79    1.92
   4   0   9    4.67    3.19
  -4   0  -9    6.26    6.56
   5  -1   0   42.17    7.97
   5  -1   0   37.51    9.64
  -5   1   0   44.87   12.75
   5  -1   0   50.48   17.95
  -5   1   0   41.23   11.56
  -5   1   0   37.99    7.99
   3   7  -3    9.48    6.24
  -3  -7   3    8.37    3.33
  -3  -7   3    9.41    3.82
  -3  -7   3   10.99    6.98
   3   7  -3   12.79    7.19
   5  -1   4   17.35   10.87
   5  -1   4   10.82   10.31
  -5   1  -4   20.38    9.18
   2  -3  -8  163.43   11.01
   2  -3  -8  168.56    7.02
   2  -3  -8  161.22   10.40
   2  -3  -8  159.19   11.83
  -2   3   8  156.93   12.23
  -3   4   4   70.69   10.78
   3  -4  -4   75.72   10.09
   3  -4  -4   81.00    6.57
  -3   4   4   72.32   28.05
   3  -4  -4   67.27    6.19
   4  -3  -2 1672.34   36.65
   4  -3  -2 1567.61   29.25
  -4   3   2 1428.93   28.73
  -4   3   2 1366.38   30.09
  -4   3   2 1457.31   27.10
   1   7  -5 1183.90   34.98
   1   7  -5 1128.56   36.59
  -1  -7   5 1103.75   32.92
  -1  -7   5 1140.31   28.20
   1   7  -5  779.42   19.58
  -2  -7  -5   88.40   11.90
   2   7   5  106.81   23.89
  -2  -7  -5   98.82   10.72
   3  -5   0  133.93    8.94
  -3   5   0  142.29   10.30
   3  -5   0  157.48   10.60
  -3   5   0  125.56   19.46
   2  -5   7  433.80   22.88
   2  -5   7  432.76   28.75
  -2   5  -7  459.57   23.64
  -2   5  -7  455.81   24.12
  -2   6   1  781.81   25.32
   2  -6  -1  717.87   25.30
   2  -6  -1  806.81   30.25
  -2   6   1  731.07   23.90
   3  -5   3   30.43   10.61
   3  -5   3   23.50    8.77
  -3   5  -3   23.99    9.99
  -3   5  -3   29.56    5.38
   3   5  -7 1288.80   27.93
  -3  -5   7 1229.45   29.77
  -3  -5   7 1361.82   27.45
  -3  -5   7 1423.47   32.57
  -2  -2  10  152.98   11.32
  -2  -2  10  155.41   12.34
   2   2 -10  145.35   10.52
   2   2 -10  107.93    6.66
   2   2 -10  130.18    6.13
  -4  -5   5  413.96   18.35
   4   5  -5  482.46   22.44
   4   5  -5  386.63   20.15
  -4  -5   5  453.58   20.93
  -4  -5   5  498.85   25.77
   0  -4  10 2711.62   57.67
   0   4 -10 2792.98   53.81
   0  -4  10 2754.27   52.41
   0   4 -10 2519.84   44.99
   0   4 -10 2570.66   45.64
   1   1 -11  243.36   13.98
  -1  -1  11  343.57   17.56
  -1  -1  11  329.98   19.56
   1   1 -11  330.03   19.67
   5   0   6  809.33   24.37
  -5   0  -6  803.17   24.35
   5   0   6  864.96   26.44
  -4  -3  -9  138.38    6.50
   4   3   9  174.53   12.19
   4   3   9  158.55    8.12
  -4  -3  -9  175.22   12.02
   4   3   9  137.65    8.37
  -4  -3  -9  177.29    7.63
  -4  -4   6 1663.80   30.63
  -4  -4   6 2091.05   42.54
   4   4  -6 1657.67   34.04
   4   4  -6 2098.26   39.04
  -4  -4   6 1952.09   37.64
  -2  -4 -10 1673.62   35.26
  -2  -4 -10 1880.11   35.06
   2   4  10 1738.66   43.13
   2   4  10 1861.92   38.55
   2  -2  -9 2614.30   49.98
  -2   2   9 2920.19   57.67
  -2   2   9 2508.77   45.49
   2  -2  -9 2528.62   51.72
  -2   3 -10  881.44   25.90
  -2   3 -10  928.29   29.28
   2  -3  10  884.08   36.23
   2  -3  10  877.83   27.76
   5   5  -1   29.06   11.91
  -5  -5   1   34.27    5.43
  -5  -5   1   36.83    7.18
   2   0 -10  302.62   15.11
  -2   0  10  326.92   17.73
  -2   0  10  366.61   21.48
   2   0 -10  336.59   20.61
   2   0 -10  277.02   16.07
   3   6   7    5.37    4.67
   3   6   7    6.52    6.73
  -3  -6  -7    0.33    7.01
  -3   1   8  533.42   27.41
   3  -1  -8  477.76   23.81
   3  -1  -8  454.94   22.90
   3  -1  -8  505.04   21.53
   3  -3  -6 3437.07   66.40
   3  -3  -6 3152.57   54.13
   3  -3  -6 3184.93   54.58
  -3   3   6 3370.19   63.16
  -3   3   6 3240.25   60.38
   1  -5  -7 1911.15   55.67
  -1   5   7 1995.88   41.28
  -1   5   7 1817.26   40.29
  -5  -5  -4  188.41   10.28
   5   5   4  205.68   11.90
  -5  -5  -4  176.14    6.96
  -5  -5  -4  147.84    5.22
   5   5   4  162.40   10.06
  -1   0  11  259.75   25.41
   1   0 -11  249.85   15.37
  -1   0  11  277.45   26.18
   1   0 -11  201.20   14.36
   2   5   9 1986.03   45.26
   2   5   9 2024.48   40.67
  -2  -5  -9 1905.13   35.00
  -2  -5  -9 2117.01   42.76
   0   2  11 1016.49   31.22
   0  -2 -11  993.23   27.94
   0  -2 -11  848.19   27.17
   0   2  11  953.65   28.79
  -1  -4 -10  474.46   25.31
   1   4  10  477.11   24.75
   1   4  10  508.65   18.30
  -1  -4 -10  501.40    9.85
   3  -4   7  313.66   18.05
   3  -4   7  294.22   16.54
  -3   4  -7  291.86   14.64
   3  -4   7  310.20   18.73
  -3   4  -7  306.86   21.37
   5   2   7  785.91   24.08
  -5  -2  -7  915.14   34.68
  -5  -2  -7  834.14   25.53
   0   5  -9 1805.64   32.51
   0   5  -9 1950.48   40.32
   0   5  -9 1848.13   32.84
   0  -5   9 1974.38   40.16
   0  -5   9 1852.61   37.94
   3   4  -8    0.83    1.61
  -3  -4   8    0.50    3.36
  -3  -4   8    2.91    8.22
   3   4  -8   -2.70    7.88
  -3  -4   8    1.11    1.83
   3   4  -8    0.97    1.57
  -2   5   5   17.43   12.06
   2  -5  -5   22.78    9.11
  -2   5   5   38.38   15.30
   2  -5  -5   28.00   10.52
  -2  -6   7   29.15   14.28
   2   6  -7   36.49   11.35
   2   6  -7   40.97   18.34
   1   7   5   23.20    3.22
   1   7   5   24.56   10.34
  -1  -7  -5   10.04    7.13
   1   7   5   24.50    9.91
  -1  -7  -5   33.80   14.55
  -1   7  -1 1497.71   36.42
   1  -7   1 1592.00   37.12
   1  -7   1 1469.46   35.86
  -1   7  -1 1658.08   42.83
   2  -6   4 3261.73   71.10
  -2   6  -4 3084.97   68.19
  -2   6  -4 3337.51   79.01
   2  -6   4 3108.97   68.72
  -5  -4  -6  603.37   22.39
  -5  -4  -6  761.88   28.20
  -5  -4  -6  555.57   20.82
  -5  -4  -6  769.53   31.27
   5   4   6  673.04   27.04
   5   4   6  848.82   30.99
  -5   1   1  824.08   30.57
   5  -1  -1  927.92   33.32
  -5   1   1  918.81   32.88
   5  -1  -1 1023.72   48.42
  -5   1   1  831.33   33.75
  -2   4  -9 1760.19   41.36
  -2   4  -9 1817.27   50.05
   2  -4   9 1823.91   43.64
   2  -4   9 1695.54   38.71
   5   1   7 1258.54   32.76
  -5  -1  -7 1287.91   31.33
  -5  -1  -7 1372.26   34.58
   1   5  -9 2863.94   67.89
  -1  -5   9 2906.06   64.83
  -1  -5   9 2851.38   63.94
   1   5  -9 2866.89   59.41
   1   5  -9 1767.30   37.07
  -5  -4   3   85.85    8.04
  -5  -4   3   98.73   10.69
   5   4  -3  118.69   15.20
   5   4  -3   73.83    8.36
  -5  -4   3  106.02    9.21
  -1   7   0 1237.74   30.80
  -1   7   0 1375.38   35.91
   1  -7   0 1225.71   30.70
   1  -7   0 1334.21   32.64
   1  -6  -5  125.44    9.73
   1  -6  -5  145.75   16.98
  -1   6   5  112.84    8.23
  -1   6   5  145.05   27.60
  -3   5   1  234.16   10.83
   3  -5  -1  227.92   18.49
  -3   5   1  242.73   24.71
   3  -5  -1  262.78   12.55
   2   7  -5   38.09   15.28
  -2  -7   5   27.86    8.81
   2   7  -5   31.18   14.36
  -1  -5  -9 1059.11   24.31
  -1  -5  -9 1039.60   29.25
   1   5   9 1064.25   28.18
   1   5   9 1136.20   29.89
   1   2 -11 1276.27   31.46
   1   2 -11 1768.42   43.87
  -1  -2  11 1761.00   41.96
  -1  -2  11 1791.95   41.00
  -3   5  -4   18.69   10.30
  -3   5  -4   19.00    7.21
   3  -5   4   17.21    9.37
   3  -5   4   24.69   11.15
  -1   7  -2    3.16    7.72
  -1   7  -2    0.60    3.36
   1  -7   2    4.41    6.65
   1  -7   2    1.36    5.41
   2  -4  -7   96.17   24.08
   2  -4  -7   82.89    8.91
  -2   4   7   78.73   13.08
  -2   4   7   91.31   24.24
   2  -4  -7   72.93    6.43
  -1  -4  10 2263.76   59.91
   1   4 -10 1459.26   32.00
   1   4 -10 2135.44   45.11
   1   4 -10 2281.64   52.92
  -1  -4  10 2324.90   53.29
   5  -1   5  232.87   22.22
   5  -1   5  205.63   13.98
  -5   1  -5  191.63   18.04
  -4   3  -6  862.11   31.11
   4  -3   6  939.16   53.19
   4  -3   6  752.70   27.01
   4  -3   6  871.78   34.74
  -4   3  -6  873.57   35.29
   0   7  -5 1131.39   19.63
   0   7  -5 1064.75   33.56
   0   7  -5  897.33   20.71
   0  -7   5 1032.45   18.96
   0  -7   5 1072.42   13.85
   5   3   7  282.72   12.33
  -5  -3  -7  237.08    6.82
  -5  -3  -7  308.48   14.26
  -5  -3  -7  293.35    8.50
   5   3   7  319.40    5.78
  -3  -6   6 1401.73   36.81
   3   6  -6 1326.27   32.70
   3   6  -6 1532.53   38.79
   2  -6  -2   26.39    6.59
   2  -6  -2   39.67   19.10
  -2   6   2   33.56   12.88
  -2   6   2   29.69   13.16
   4   7   1  343.95   13.15
  -4  -7  -1  317.10    6.13
  -4  -7  -1  311.60    8.34
   4   7   1  264.87    6.39
  -4  -7  -1  264.49   11.10
   0  -7  -4   73.49   12.27
   0   7   4   74.46    6.82
   0  -7  -4   65.38   11.16
   0   7   4   62.90    6.10
   0   7   4   90.39   30.66
   0   3 -11   92.59   10.50
   0  -3  11  105.85   15.27
   0   3 -11   99.14   15.98
   0  -3  11  104.80   10.25
   1  -4  10  532.33   22.48
   1  -4  10  536.05   24.89
  -1   4 -10  523.17   20.82
  -1   4 -10  571.27   31.01
  -3  -1 -11 2071.48   47.34
   3   1  11 1778.66   39.80
  -3  -1 -11 1960.09   47.75
   3   1  11 2000.70   54.84
  -5  -2   4 1533.50   31.83
   5   2  -4 1644.77   41.00
  -5  -2   4 1536.20   31.92
  -5  -2   4 1591.79   37.36
   5   2  -4 1232.31   31.27
  -2   2 -11 1272.67   31.67
   2  -2  11 1265.78   30.24
  -2   2 -11 1347.75   36.37
   2  -2  11 1279.53   38.18
  -3  -7  -5    6.04    5.99
   3   7   5   18.58    8.18
   4   7   0  273.57   13.83
  -4  -7   0  236.78    7.50
  -4  -7   0  249.61    6.07
  -4  -7   0  241.22   13.34
  -4  -7   0  248.66   13.22
   4   7   0  195.38    6.25
  -1  -3 -11   35.28    6.27
  -1  -3 -11   41.19   19.14
   1   3  11   39.33   17.77
   1   3  11   43.41    8.76
  -5   0   3    3.50    7.77
   5   0  -3    4.14    4.74
  -5   0   3   -0.64    4.88
  -3  -2   9  127.20    8.66
   3   2  -9  101.53    4.83
  -3  -2   9  127.07   10.99
   3   2  -9   99.73   11.06
   3   2  -9  117.04    6.22
  -3  -1   9    2.43    5.87
   3   1  -9    4.73    7.04
   3   1  -9   -0.06    1.73
   3   1  -9    0.59    5.64
  -3  -1   9   -0.10    1.67
  -1   7   1  634.55   29.64
   1  -7  -1  562.35   24.28
   1  -7  -1  600.01   24.96
  -1   7   1  563.07   23.58
   4   7   2   92.68    8.64
   4   7   2   77.65    4.74
  -4  -7  -2   85.67    4.28
  -4  -7  -2   97.00    7.52
  -4  -7  -2   68.37    9.95
  -2  -3 -11   55.31   23.90
  -2  -3 -11   48.21   14.31
   2   3  11   21.80   18.41
   2   3  11   46.03   16.67
   4   1  -7  343.58   15.30
  -4  -1   7  391.20   14.73
   4   1  -7  416.51   13.71
   2   3 -10  567.83   22.61
  -2  -3  10  671.91   37.67
  -2  -3  10  664.79   25.37
   2   3 -10  641.28   26.25
  -2  -3  10  564.83   21.70
   4   6   6 1623.06   43.36
   4   6   6 2031.42   51.45
  -4  -6  -6 1937.98   45.58
   4   6  -4   17.57    5.58
   4   6  -4   12.05   10.37
  -4  -6   4   14.49    6.46
  -4  -6   4   14.24    4.02
  -4  -6   4   15.74    4.92
  -5  -5   2  661.54   26.29
  -5  -5   2  594.90   23.00
   5   5  -2  681.20   27.78
   5   5  -2  479.27   22.91
   3  -3   9  164.35    6.40
  -3   3  -9  154.41   20.92
   3  -3   9  162.84    7.18
  -3   3  -9  165.61   11.16
   3  -3   9  160.84   11.05
  -3   2 -10  895.77   37.49
   3  -2  10  891.71   32.29
  -3   2 -10  921.14   36.08
   3  -2  10  904.57   35.20
   4  -2   8  209.56    6.05
   4  -2   8  202.55    5.95
   4  -2   8  206.33   12.05
   4  -2   8  228.90   11.66
  -4   2  -8  216.64   14.55
  -3  -7   4  865.46   40.37
   3   7  -4  932.69   45.36
   3   7  -4  825.37   31.57
  -5  -3   4  365.30    5.91
   5   3  -4  422.77   11.77
  -5  -3   4  389.54    6.39
  -5  -3   4  406.31   16.46
   5   3  -4  314.57   10.63
  -1   7  -3  251.79   11.91
   1  -7   3  265.11    7.99
   1  -7   3  258.36   11.49
  -1   7  -3  290.33   14.72
  -4   1  -9 1221.73   33.49
   4  -1   9 1108.56    9.38
  -4   1  -9 1181.83   42.91
   4  -1   9 1069.68   23.26
   4  -1   9 1163.11   31.72
   3   0  11 1004.29   24.95
  -3   0 -11 1120.38   28.94
  -3   0 -11 1108.00   31.50
   3   0  11 1064.88   29.08
   1  -1 -11   11.29    9.93
   1  -1 -11    6.30    7.52
  -1   1  11    8.22    7.15
  -1   1  11   12.08    8.89
   5   5   5 1811.57   41.77
  -5  -5  -5 1728.63   40.90
   5   5   5 1331.30   32.68
  -5  -5  -5 1638.67   35.80
  -4   3   3   55.96   23.08
  -4   3   3   65.52    8.42
  -4   3   3   65.37    3.89
   4  -3  -3   62.94    8.47
   4  -3  -3   65.97    9.71
  -1   0 -12 2407.90   53.85
   1   0  12 2472.76   56.79
   1   0  12 2645.30   59.78
  -1   0 -12 2600.38   72.80
  -4  -3   7 2356.33   49.94
   4   3  -7 2042.49   47.45
   4   3  -7 2491.54   56.45
  -4  -3   7 2460.44   56.89
   1  -3  11  488.66   16.02
  -1   3 -11  479.36   35.04
   1  -3  11  464.98   15.18
  -1   3 -11  462.85   13.30
  -1   6  -7  583.99   22.06
  -1   6  -7  578.70   25.98
  -1   6  -7  554.62   27.91
   1  -6   7  560.80   23.41
   1  -6   7  550.30   25.45
  -4   1   6  159.64   10.49
   4  -1  -6  161.85   19.08
   4  -1  -6  177.47   10.20
   3   2  11  682.64   49.86
   3   2  11  589.70   23.50
  -3  -2 -11  626.21   26.41
  -3  -2 -11  671.44   28.16
   2   8   0  251.88   13.46
  -2  -8   0  203.18   11.71
  -2  -8   0  220.98    6.39
   2   8   0  178.56   13.94
  -2  -8   0  182.73    7.02
   2   8   0  209.46    7.40
  -5  -1   4 1506.91   36.07
   5   1  -4 1614.73   39.54
  -4  -7   1 1115.23   24.83
   4   7  -1  885.73   21.77
  -4  -7   1 1119.08   25.48
  -4  -7   1 1161.60   26.58
   4   7  -1 1257.32   32.46
  -4  -7   1 1036.12   29.14
   2   6   8  258.21   11.42
  -2  -6  -8  264.66   22.62
   2   6   8  251.45   13.99
   2   6   8  243.45    4.21
   2   6   8  247.75    4.43
   3   5   9  170.66   13.77
   3   5   9  159.42    9.43
  -3  -5  -9  161.86    4.65
   3   5   9  150.60    5.52
  -3  -5  -9  183.78   22.67
  -2   1  10 1006.06   31.53
   2  -1 -10  803.21   33.32
   2  -1 -10  947.60   26.78
  -2   1  10  936.91   24.38
   2  -1 -10  905.55   32.47
   0  -6  -7  379.60   12.68
   0   6   7  425.20   20.04
   0   6   7  379.57    9.20
   0   6   7  388.64   10.56
   0  -6  -7  405.36   26.64
   2   8   1    0.04    1.81
  -2  -8  -1    3.86    7.81
  -2  -8  -1   -1.12    1.99
   2   8   1    2.23    7.26
  -2  -8  -1    2.26    3.95
  -3  -4 -10 1310.96   29.98
  -3  -4 -10 1341.68   41.55
   3   4  10 1226.21   34.46
   3   4  10 1079.03   25.09
   3   4  10 1118.52   28.21
   4   7   3  474.65   14.06
  -4  -7  -3  439.04   13.92
  -4  -7  -3  354.02   14.55
  -4  -7  -3  426.81    3.47
  -4  -7  -3  406.97    3.74
   3  -5  -2   26.69    6.23
  -3   5   2   21.64    9.66
  -3   5   2   23.85    7.74
   3  -5  -2   38.61    9.42
   1   6  -8  866.45   44.73
  -1  -6   8  822.26   33.45
   1   6  -8  840.26   40.05
  -2   6  -5 3801.36   82.34
  -2   6  -5 3549.50   82.05
   2  -6   5 3568.39   31.68
   2  -6   5 3794.01   35.98
   5   0   7  839.89   39.38
   5   0   7  782.73   30.52
  -5   0  -7  785.39   31.69
  -2  -8   1   89.37    5.22
  -2  -8   1   91.14   20.30
  -2  -8   1   89.69    7.91
   2   8  -1   94.70    9.13
   2   8  -1  110.96   17.79
   2   8  -1   81.55   12.27
  -4   2   5    5.69    6.79
   4  -2  -5    0.62    0.84
   4  -2  -5    5.46    8.09
  -4   2   5    3.75    6.53
  -1   5  -9  344.34   14.51
   1  -5   9  342.47   14.57
   1  -5   9  322.84   13.61
  -1   5  -9  313.30   11.34
  -1   5  -9  319.77    8.98
   3  -5   5   37.25   13.24
  -3   5  -5   27.26   15.06
   3  -5   5   32.45    8.41
  -3   5  -5   34.51   13.23
  -5   1   2 1307.83   30.39
  -5   1   2 1233.57   31.48
  -5   1   2 1391.74   30.28
   5  -1  -2 1572.42   38.41
   5  -1  -2 1350.03   28.90
   1   1  12 2456.81   55.22
  -1  -1 -12 2327.69   62.06
  -1  -1 -12 2620.72   61.81
   1   1  12 2409.28   55.24
   1   8   0 1807.67   40.32
  -1  -8   0 1691.96   40.70
   1   8   0 1986.71   47.33
  -1  -8   0 1706.03   38.25
  -2  -7  -6  830.85   32.88
   2   7   6  946.71   40.57
  -2  -7  -6  788.35   31.28
   1   7  -6  556.34   25.82
   1   7  -6  512.39   14.59
  -1  -7   6  517.53   24.63
   1   7  -6  384.36    3.34
   4  -4   2 1086.50   27.29
   4  -4   2 1174.71   34.75
  -4   4  -2 1029.45   28.26
  -4   4  -2 1124.88   26.43
   1  -1  12 1275.06   32.73
  -1   1 -12 1192.35   29.45
  -1   1 -12 1309.53   35.15
   1  -1  12 1250.61   31.48
  -4  -1 -10  274.82   10.83
  -4  -1 -10  282.27   12.40
   4   1  10  216.03    6.84
   4   1  10  254.08   12.65
  -4  -1 -10  238.29    8.32
   1   8  -1  635.99   28.69
  -1  -8   1  585.06   22.31
  -1  -8   1  549.46   24.67
   1   8  -1  588.54   25.91
  -4  -4  -9 2767.32   58.32
   4   4   9 2496.47   54.46
   4   4   9 2062.70   44.21
   4   4   9 2478.05   57.98
  -4  -4  -9 2655.40   62.48
  -4   4  -1 1028.78   15.14
   4  -4   1  993.32   36.91
   4  -4   1 1095.42   42.31
  -4   4  -1  938.46   17.07
   0   6  -8  738.37   26.97
   0   6  -8  734.81   26.70
   0  -6   8  737.24   38.44
   0   6  -8  749.08   38.53
   0   6  -8  739.83   39.58
  -4  -5  -8 2270.35   47.14
   4   5   8 1707.05   35.77
   4   5   8 2116.81   48.94
  -4  -5  -8 2262.14   52.70
   4   5   8 1987.65   51.97
  -3  -3   9   71.77    8.45
   3   3  -9   66.67   13.56
  -3  -3   9   47.44    4.33
   3   3  -9   75.67   27.96
  -3  -3   9   66.92   25.02
   3   3  -9   58.57    3.85
   1  -7  -2    2.21    7.98
  -1   7   2    1.52    6.14
   1  -7  -2    0.98    6.44
  -1   7   2   -3.35    5.29
  -3   0   9  107.35    3.60
   3   0  -9  105.84    5.15
   3   0  -9  113.80   12.89
   3   0  -9   91.93   10.04
  -3   0   9  118.72   15.99
   3  -4  -5 1463.09   38.45
   3  -4  -5 1352.73   30.28
  -3   4   5 1361.51   34.15
  -3   4   5 1451.49   37.27
   3  -4  -5 1294.55   28.60
   4   2  10  137.19   13.15
  -4  -2 -10  130.49   29.25
  -4  -2 -10  117.02    4.89
   4   2  10  116.41    7.59
  -4  -2 -10  129.53    7.56
  -1  -8  -1   84.41    7.60
  -1  -8  -1   83.78   10.69
   1   8   1  100.11   14.78
   1   8   1   87.82    6.71
  -1  -8  -1   84.24    8.24
   5  -2   2  456.61   10.14
  -5   2  -2  441.05    8.05
   5  -2   2  416.08    7.10
   5  -2   2  496.92   20.45
  -5   2  -2  417.19   13.63
   1  -4  -9  144.57   12.52
  -1   4   9  142.85    8.85
   1  -4  -9  148.95   12.19
  -1   4   9  143.24   13.03
  -5   1  -6  338.49   15.20
   5  -1   6  319.72   13.93
   5  -1   6  364.29   16.28
   4  -4   3   18.63    7.75
   4  -4   3   18.62   12.89
   4  -4   3    9.72    3.78
  -4   4  -3   15.50    5.43
  -4   4  -3   11.07   10.80
   1  -3 -10  107.74    9.39
   1  -3 -10  108.68    8.55
  -1   3  10  118.18   12.24
  -1   3  10  120.20    7.38
   0   0 -12  368.80   13.06
   0   0 -12  322.03   10.68
   0   0  12  408.19   12.82
   0   0  12  389.57   18.73
  -5  -6  -1  307.46   11.33
  -5  -6  -1  301.51    7.94
   5   6   1  379.32   21.61
  -5  -6  -1  337.17    8.55
  -5  -6  -1  342.15    9.24
   0  -4 -10 2311.55   53.27
   0   4  10 2331.97   51.93
   0  -4 -10 2246.52   52.63
   0   4  10 2445.23   56.46
  -2  -8  -2   25.57    6.38
  -2  -8  -2   21.47   10.67
   2   8   2   28.78   11.05
  -2  -8  -2   25.93    4.19
   2   8   2   26.94    7.99
  -5  -6  -2    2.63    2.63
   5   6   2    2.59    5.09
   5   6   2   14.95    5.89
  -5  -6  -2    6.75    4.93
  -5  -6  -2    3.71    3.07
   1   6   8  340.57   10.32
   1   6   8  333.85    6.39
  -1  -6  -8  349.79   65.42
   1   6   8  372.21   14.81
   1   6   8  348.26   34.30
  -1  -3  11 1574.03   38.24
  -1  -3  11 1633.63   39.23
   1   3 -11 1075.81   24.93
   1   3 -11 1643.21   40.03
   0   1 -12    7.40   10.22
   0   1 -12    0.38    8.29
   0  -1  12   12.38    8.63
   0  -1  12    8.53   10.17
   1  -7   4  411.62   10.09
  -1   7  -4  375.36   22.84
  -1   7  -4  393.55   15.24
   1  -7   4  364.48   12.85
   5  -2   1  783.16   28.50
   5  -2   1  902.04   35.41
  -5   2  -1  780.82   31.72
  -5   2  -1  794.85   29.33
   5  -2   1  855.29   31.43
   2  -6  -3 1099.20   27.35
  -2   6   3 1203.50   31.77
  -2   6   3 1127.70   29.34
   2  -6  -3 1177.70   31.68
   2  -5   8 2063.10   50.02
   2  -5   8 2092.19   47.26
  -2   5  -8 2046.90   48.58
  -2   5  -8 2033.28   48.30
  -5   2  -3  156.80    6.25
   5  -2   3  177.54   12.95
   5  -2   3  140.03    6.11
   5  -2   3  156.17    9.43
  -5   2  -3  144.43   10.97
   4   0  -7   72.58   14.84
  -4   0   7   94.87   12.85
   4   0  -7   85.80   11.23
   5   4   7  713.16   28.43
  -5  -4  -7  795.91   32.42
  -5  -4  -7  590.85   22.07
   5   4   7  575.09   21.38
  -5  -4  -7  770.77   28.73
   5   4   7  837.38   30.63
  -1  -8   2  448.59   34.00
   1   8  -2  532.29   17.91
   1   8  -2  453.64   11.70
  -1  -8   2  484.51    9.08
  -2  -8   2    1.25    7.47
   2   8  -2    1.43    8.21
   2   8  -2    0.43    1.74
  -2  -8   2    0.73    1.27
   2   8  -2    2.30    2.14
  -4   4   0  603.60   27.17
   4  -4   0  680.44   27.17
  -4   4   0  634.79   31.11
   4  -4   0  748.95   31.90
   2   0  12   40.92    9.93
   2   0  12   33.50    8.50
  -2   0 -12   31.37    5.97
  -2   0 -12   45.58    8.82
  -4  -5   6  959.79   41.70
  -4  -5   6  717.25   25.67
   4   5  -6  975.09   34.75
  -4  -5   6  931.42   34.28
   4   5  -6  791.40   31.36
   5   2   8 1706.88   41.27
  -5  -2  -8 1800.17   45.00
  -5  -2  -8 1868.27   44.58
  -5  -2  -8 1675.61   34.66
  -2  -1 -12    5.44    8.69
   2   1  12   -0.67    8.66
  -2  -1 -12   -0.33    6.21
   2   1  12    8.10    8.16
   5   4  -4    0.70    3.15
  -5  -4   4    2.89    3.35
  -5  -4   4    1.60    2.41
  -5  -4   4    1.84    2.61
   5   4  -4    0.78    3.72
  -5  -6   0   30.65    5.30
   5   6   0   28.17   12.92
  -5  -6   0   44.12    8.88
   5   6   0   30.53   11.91
   4   7  -2  233.11   14.47
   4   7  -2  173.77   13.32
  -4  -7   2  215.93    8.23
  -4  -7   2  215.58    7.58
  -4  -7   2  203.25   11.57
   3  -4   8   53.40    9.22
   3  -4   8   68.76   12.52
  -3   4  -8   64.54   21.73
  -3   4  -8   53.76    7.73
   1   7   6  588.18   21.92
  -1  -7  -6  592.24   24.90
   1   7   6  627.94   33.36
  -1  -7  -6  566.75   25.45
   1   7   6  582.82   22.54
   3  -1  11 1052.23   25.02
  -3   1 -11 1071.48   28.14
  -3   1 -11 1106.29   32.36
   3  -1  11 1107.35   30.46
   4  -3   7  931.35   51.40
   4  -3   7  833.22   30.01
   4  -3   7  882.99   34.52
  -4   3  -7  882.65   35.97
  -2  -5   9  233.63    9.99
   2   5  -9  234.41   10.48
  -2  -5   9  247.36   13.59
   2   5  -9  237.11    3.58
  -5  -6  -3  144.77    4.49
  -5  -6  -3  132.41    5.68
   5   6   3  131.20   16.14
  -5  -6  -3  171.63   10.12
   5   6   3  166.45    8.30
  -4   0 -10  617.16   26.04
  -4   0 -10  638.78   26.69
   4   0  10  557.04   21.34
   4   0  10  619.18   26.70
   4   0  10  510.26   19.15
  -4  -7  -4  475.93   20.27
   4   7   4  497.35   14.87
   4   7   4  397.45   19.25
  -5  -5   3   12.97    6.87
  -5  -5   3    8.66    5.88
  -5  -5   3   12.59    8.99
   5   5  -3   12.94    4.51
   0   7  -6  198.80   15.58
   0  -7   6  200.83    7.81
   0   7  -6  169.91    7.96
   0   7  -6  186.03   17.72
   0  -7   6  196.45   11.33
  -5  -1  -8  433.70   13.50
   5   1   8  410.82   15.02
  -5  -1  -8  430.22   16.75
  -1  -8  -2  131.03    7.10
  -1  -8  -2  138.43   20.78
   1   8   2  150.46   11.17
   1   8   2  143.45    6.41
  -1  -8  -2  128.17   17.49
   3   6   8   -1.35    7.14
  -3  -6  -8    6.32    7.03
   3   6   8   10.56    6.45
   2   7  -6    6.34    5.81
   2   7  -6    3.59    6.23
  -2  -7   6   11.74    7.60
   4  -4   4  745.84   29.35
  -4   4  -4  846.59   33.75
   4  -4   4  861.06   33.84
  -4   4  -4  906.15   33.08
   4  -4   4  942.27   42.98
   0  -3 -11  134.68    9.89
   0   3  11  149.39   12.13
   0   3  11  153.36   20.77
   0  -3 -11  138.20   15.20
   0   7   5  156.50   15.67
   0  -7  -5  139.78   18.87
   0  -7  -5  134.25   14.10
   0   7   5  127.83    5.58
   0   7   5  133.02   12.70
   0  -5  -9   21.96    8.39
   0  -5  -9   42.19    9.04
   0   5   9   40.76   11.38
   0   5   9   47.56   13.93
   2  -5  -6    2.40    3.18
  -2   5   6    1.73    8.65
  -2   5   6    3.42    6.74
   2  -5  -6    3.90    4.48
   5  -2   0  285.30   14.00
  -5   2   0  242.39    8.68
   5  -2   0  249.40    7.82
   5  -2   0  228.67    8.29
  -5   2   0  216.29    8.14
  -5   2   0  227.17   12.07
   3  -2  -8  452.01   20.24
   3  -2  -8  468.55   36.13
   3  -2  -8  414.98    5.92
   3  -2  -8  479.36   17.38
  -3   2   8  509.01   30.58
   5  -2   4  152.96   10.88
  -5   2  -4  146.11    3.96
  -5   2  -4  136.89   11.97
   5  -2   4  128.92    6.29
   5  -2   4  143.62    9.33
   5   5   6  994.96   26.16
  -5  -5  -6 1193.60   31.71
   5   5   6 1289.79   29.94
  -5  -5  -6 1165.64   26.86
  -5  -5  -6  885.03   31.58
   3   7   6  174.24   20.19
  -3  -7  -6  176.35   15.77
   3   7   6  192.51   11.36
  -4  -4   7 1765.25   38.11
   4   4  -7 2119.25   48.64
   4   4  -7 2519.00   54.00
  -4  -4   7 2416.93   52.32
  -4  -4   7 2514.82   58.22
   0   1  12 2060.02   48.04
   0  -1 -12 2102.77   48.52
   0  -1 -12 1668.97   43.85
   0   1  12 2045.34   47.34
   1  -6  -6  732.01   30.95
  -1   6   6  827.13   34.38
  -1   6   6  739.60   28.76
   1  -6  -6  709.29   28.11
  -3  -3 -11   86.07   10.28
   3   3  11   78.80   11.61
  -3  -3 -11   86.87    6.34
   3   3  11   40.80   14.25
  -3  -5   8   79.30   10.25
   3   5  -8   82.88   23.36
   3   5  -8   73.37    5.06
  -3  -5   8   67.00    2.74
  -3  -5   8   75.50    7.46
  -3  -8   0 1606.75   47.05
   3   8   0 1727.73   37.68
  -3  -8   0 1385.78   31.16
  -3  -8   0 1799.92   38.75
   3   8   0 1958.12   51.54
   3   8   0 1510.02   33.28
  -3  -8  -1  340.05    6.80
  -3  -8  -1  274.55   14.34
   3   8   1  280.21    6.15
   3   8   1  386.45   20.12
  -3  -8  -1  294.99   13.88
   5   0  -4  802.79   35.53
  -5   0   4  622.09   35.86
  -5   0   4  722.97   35.72
  -2  -8  -3  595.25   24.21
  -2  -8  -3  622.39   22.53
   2   8   3  746.53   31.08
   2   8   3  614.08   22.10
  -2  -8  -3  609.97   26.31
  -4  -3 -10    6.10    9.09
  -4  -3 -10    4.13    4.19
   4   3  10    8.51   11.29
   4   3  10    3.74    4.89
  -4  -3 -10   10.58    4.56
  -1  -2 -12 1137.07   31.19
  -1  -2 -12 1269.07   31.09
   1   2  12 1178.12   30.44
   1   2  12 1246.73   31.50
   3  -3  -7  745.75   26.66
  -3   3   7  786.06   33.39
  -3   3   7  743.97   30.13
   3  -3  -7  702.61   25.86
   3  -3  -7  759.88   30.13
   3   7  -5 1471.78   34.81
  -3  -7   5 1479.21   36.08
   3   7  -5 1659.53   40.81
  -5  -6   1  621.39   23.87
  -5  -6   1  538.48   22.14
   5   6  -1  424.69   19.73
   5   6  -1  628.17   25.56
  -3   5   3  163.96   18.48
   3  -5  -3  158.50   13.61
  -3   5   3  161.85   11.97
   3  -5  -3  173.78   11.80
   4   6   7  393.65   16.40
   4   6   7  315.96   12.28
  -4  -6  -7  386.45   15.41
  -1  -8   3  799.65   29.21
  -1  -8   3  739.22   30.00
   1   8  -3  749.81   29.21
   1   8  -3  805.29   44.40
   1   8  -3  505.90   19.08
  -1   2 -12   70.52    8.40
  -1   2 -12   84.23   17.98
   1  -2  12   80.45    8.44
   1  -2  12   89.90   11.34
   4  -4  -1   80.10   10.56
  -4   4   1   59.31   13.33
  -4   4   1   69.07   19.36
   4  -4  -1   75.72   13.08
  -2   1 -12    8.16    9.74
   2  -1  12   10.44    7.33
  -2   1 -12    2.38    6.84
   2  -1  12    5.79    4.69
   0  -2  12  236.97   11.87
   0   2 -12  251.67   13.94
   0  -2  12  233.65   12.07
   0   2 -12  204.80   14.38
  -1   7   3 1206.48   32.47
   1  -7  -3 1052.70   27.50
   1  -7  -3 1103.70   29.61
  -1   7   3 1123.22   28.31
  -4  -6   5  520.21   17.34
  -4  -6   5  426.74    4.98
  -4  -6   5  490.46   20.33
   4   6  -5  415.12   18.64
  -4  -6   5  491.04    5.14
  -2  -6   8   66.78   16.08
   2   6  -8   81.39   10.58
  -2  -6   8   66.37    9.74
   5   2  -5   35.22   20.37
  -5  -2   5   50.16   14.50
   5   2  -5   56.52    8.56
  -1   5   8  916.41   23.98
   1  -5  -8  912.08   22.99
  -1   5   8  968.79   27.51
   1  -5  -8  963.91   29.30
  -2  -4  10    7.93    7.37
  -2  -4  10   -0.82    2.02
   2   4 -10   -3.41    7.55
  -2  -4  10    1.03    4.85
   2   4 -10    3.28    4.55
  -3   5  -6   43.81   10.47
   3  -5   6   46.30   22.73
  -3   5  -6   37.21   12.01
   3  -5   6   43.57   16.92
   4  -3  -4   32.75    7.46
   4  -3  -4   32.51    9.57
  -4   3   4   31.49    8.62
  -4   3   4   27.00   10.33
   4  -3  -4   26.62    7.02
   2  -3  -9 1387.44   34.30
  -2   3   9 1505.37   37.82
   2  -3  -9 1376.97   34.46
   2  -3  -9 1441.26   44.63
  -2   6  -6   10.85    8.07
   2  -6   6    4.60    6.65
  -2   6  -6    8.23    7.80
   2  -6   6    6.87    7.42
   1  -2 -11   30.65   10.01
   1  -2 -11   30.60    9.49
  -1   2  11   31.07   16.69
  -1   2  11   30.55   16.48
  -2  -8   3  197.24    6.01
  -2  -8   3  186.43   11.42
   2   8  -3  170.88    7.64
   2   8  -3  188.85    9.26
   2   8  -3  183.56   11.67
   2   2  12   48.84   13.32
   2   2  12   44.68   12.97
  -2  -2 -12   45.31    7.24
  -2  -2 -12   35.84    7.96
  -3  -8   1 1121.76   25.64
  -3  -8   1  870.55   20.41
   3   8  -1 1071.87   12.92
   3   8  -1  991.94   23.87
  -3  -8   1 1001.94   29.08
   3   8  -1 1237.54   32.78
   3   8   2    9.44    6.04
   3   8   2   12.86    3.74
  -3  -8  -2   12.01    7.63
  -3  -8  -2   16.92    3.74
  -3  -8  -2   14.31    7.01
  -5  -6  -4    8.13    6.70
  -5  -6  -4    5.01    3.22
   5   6   4    6.94    6.56
  -5  -6  -4    6.73    2.69
   5   6   4    6.75    9.33
  -5   1   3  264.98    9.62
  -5   1   3  240.09   12.45
   5  -1  -3  324.12   11.44
  -5   1   3  266.60    3.57
   5   3  -5  228.11   10.81
  -5  -3   5  293.45   24.11
  -5  -3   5  255.67    5.03
  -5  -3   5  277.04    5.04
   5   3  -5  289.18    9.77
  -3  -6   7  145.05    8.17
  -3  -6   7  162.35   21.83
   3   6  -7  147.55   11.25
  -1   7  -5   43.72   15.94
   1  -7   5   34.66    7.57
   1  -7   5   42.19    9.40
  -1   7  -5   45.45   17.14
   2   5  10 3299.36   31.27
   2   5  10 3361.27   31.05
  -2  -5 -10 3358.87   30.98
  -2  -5 -10 3239.19   18.61
  -2   3 -11  536.75   26.88
   2  -3  11  551.95   23.25
   2  -3  11  580.46   38.21
  -2   3 -11  568.59   24.84
   0  -5  10 1132.31   30.21
   0   5 -10 1125.49   30.56
   0   5 -10 1064.03   11.09
   0  -5  10 1087.68   30.20
   0   5 -10 1036.89   24.56
  -2   4 -10   17.70   10.15
  -2   4 -10   19.17    7.21
   2  -4  10   19.34    8.65
   2  -4  10   24.07    9.31
   6   2   2  148.26   18.65
   6   2   2  117.96    7.59
  -6  -2  -2  131.59    7.42
  -6  -2  -2  151.72    7.52
  -6  -2  -2  129.51   10.70
  -5   2   1  492.46   19.72
  -5   2   1  526.42   19.70
   5  -2  -1  548.58   22.39
   5  -2  -1  614.70   27.32
  -5   2   1  496.25   22.19
   1   8   3 1918.61   41.75
  -1  -8  -3 1774.63   38.31
   1   8   3 2111.49   49.43
  -1  -8  -3 1771.65   53.19
  -1  -8  -3 1809.51   42.44
  -3  -4   9  205.98   11.85
  -3  -4   9  207.80    8.16
  -3  -4   9  170.49    7.49
   3   4  -9  213.89    9.84
   3   4  -9  189.72   27.83
   0  -4  11  239.82   11.68
   0   4 -11  247.65   27.58
   0   4 -11  221.27   10.50
   0  -4  11  244.66   21.43
   0   4 -11  235.69    8.86
  -2  -1  11  974.51   35.56
   2   1 -11  852.39   31.06
   2   1 -11  728.71   31.10
  -2  -1  11  951.68   37.74
   2   1 -11  921.26   35.98
  -4  -7   3   45.93    5.58
   4   7  -3   66.20   28.36
   4   7  -3   39.05   11.99
  -4  -7   3   49.00   10.61
  -4  -7   3   50.63    3.02
   4  -4   5 2185.28   46.66
   4  -4   5 2514.12   56.68
  -4   4  -5 2606.09   55.50
  -4   4  -5 2139.09   50.57
   4  -4   5 2727.80   63.06
   5  -2   5  249.51   19.72
   5  -2   5  240.13   12.97
  -5   2  -5  223.70   17.01
   5  -2   5  212.73    3.53
   3  -1  -9  608.69   21.58
   3  -1  -9  556.36   19.78
   3  -1  -9  599.34   25.84
  -3   1   9  663.05   28.24
   3  -1  -9  603.41   26.22
   0  -8   1  274.66   19.21
   0  -8   1  297.66    9.27
   0   8  -1  305.65   10.63
   0   8  -1  338.56   15.99
  -6  -3  -2   13.08    7.87
   6   3   2   22.07    7.36
  -6  -3  -2   16.58    7.62
  -6  -3  -2   16.18    5.07
   6   3   2   10.17    4.01
   5  -1   7  181.81   29.11
   5  -1   7  178.35   27.53
  -5   1  -7  163.38   13.82
   2   4  11  265.72    6.88
   2   4  11  308.59  127.57
  -2  -4 -11  276.36   22.63
  -2  -4 -11  292.26    7.88
   2   4  11  273.74   13.58
  -4   2  -9  899.75   35.57
   4  -2   9  855.97   30.71
   4  -2   9  902.84   36.36
   4  -2   9  852.43   30.59
  -4   2  -9  850.48   34.13
   0  -8   0 1143.17   29.86
   0  -8   0 1179.33   30.86
   0   8   0 1192.60   28.79
   0   8   0 1333.07   34.83
   5   0   8  498.93   21.97
  -5   0  -8  563.12   25.35
  -5   0  -8  532.25   26.56
   2  -4  -8    2.62    7.84
   2  -4  -8    2.62    3.26
  -2   4   8   -0.49    8.57
   2  -4  -8    3.06    2.29
  -2   4   8    2.05    4.76
   6   2   3  416.20   10.25
  -6  -2  -3  505.75    6.10
  -6  -2  -3  416.77    5.37
   6   2   3  479.88   13.42
  -6  -2  -3  461.31   14.55
   5   1  -5  893.74   37.74
   5   1  -5  706.06   30.65
  -5  -1   5  847.83   33.11
   6   2   1   59.95    5.92
   6   2   1   86.04    9.08
  -6  -2  -1   68.85    7.85
  -6  -2  -1   67.08    9.66
  -6  -2  -1   67.52    7.13
  -1   6  -8   40.45    9.33
   1  -6   8   46.23    7.40
  -1   6  -8   61.24   26.94
   1  -6   8   44.13   10.78
  -1   6  -8   50.65   21.64
   4   7   5   41.21   14.14
   4   7   5   54.43    8.16
  -4  -7  -5   54.03   25.11
   2  -2 -10 2071.77   48.95
   2  -2 -10 2014.31   71.10
  -2   2  10 2309.85   59.34
  -2   2  10 2015.04   43.47
  -6  -3  -1   89.80    9.84
   6   3   1   73.48    8.04
  -6  -3  -1   96.41    5.20
  -6  -3  -1  101.11    4.80
   6   3   1  106.23   16.21
   2  -6  -4  988.28   28.38
  -2   6   4  944.37   27.76
  -2   6   4 1039.97   29.61
   2  -6  -4  910.73   23.52
  -6  -3  -3  209.44    5.27
  -6  -3  -3  186.57    5.66
   6   3   3  175.98    8.88
  -6  -3  -3  181.34   10.10
   6   3   3  212.21   11.25
   2   2 -11  120.87   11.52
   2   2 -11   89.87    8.29
  -2  -2  11  113.58   11.46
  -2  -2  11  113.12   11.24
  -1  -5  10 1773.64   43.59
   1   5 -10 1730.41   44.47
  -1  -5  10 1708.80   42.04
   1   5 -10 1075.11   23.69
   1   5 -10 1661.49   35.20
   4   2  -8 1357.68   34.73
  -4  -2   8 1556.18   39.60
  -4  -2   8 1517.70   31.60
   4   2  -8 1518.90   40.63
   1   4  11    8.24    7.49
  -1  -4 -11    9.01    4.49
  -1  -4 -11    4.40    5.58
   1   4  11    3.08    7.11
   0  -8   2    3.41    7.10
   0   8  -2    5.72    5.11
   0   8  -2   -2.02    9.80
   0  -8   2    5.72    7.82
   3   8  -2    2.22    4.25
  -3  -8   2    5.00    2.24
  -3  -8   2    2.35    2.78
   3   8  -2    1.43    7.69
  -3  -8   2    5.03    6.27
  -3  -8  -3  668.65   26.14
  -3  -8  -3  710.06   30.31
   3   8   3  849.09   39.93
  -2  -7  -7 1161.66   35.22
   2   7   7 1236.43   37.75
   2   7   7 1381.83   35.15
   1   5  10   14.58    8.69
  -1  -5 -10    4.79    3.64
   1   5  10    8.75    8.33
  -1  -5 -10   15.08    9.92
   1   5  10    2.94    2.55
  -1  -7   7   72.77   12.01
   1   7  -7   68.87   24.90
   1   7  -7   56.80   14.32
   5   6  -2    8.88    7.66
  -5  -6   2   11.32    3.86
  -5  -6   2    5.95    3.51
   5   6  -2    7.61    4.44
  -5  -6   2    3.45    5.35
   0   8   1   68.60   19.43
   0   8   1   48.58   10.98
   0  -8  -1   62.77   24.03
   0  -8  -1   53.78    8.63
  -4   1 -10 2128.13   56.47
   4  -1  10 2112.55   50.34
   4  -1  10 1999.24   42.20
  -4   1 -10 2102.23   49.79
   4  -1  10 1920.50   41.39
  -3   3 -10 3214.13   72.48
   3  -3  10 3081.66   69.26
   3  -3  10 3122.86   66.56
  -3   3 -10 3150.03   73.68
   2   8   4   18.36    4.08
   2   8   4   24.45    3.51
  -2  -8  -4   30.13    9.42
  -2  -8  -4   28.62    9.04
   2   8   4   30.23   16.70
   2   0 -11  125.47   12.08
   2   0 -11  181.99    6.41
  -2   0  11  174.11   12.98
  -2   0  11  195.01    7.10
   2   0 -11  192.28   12.65
   1   1 -12  408.35   18.23
   1   1 -12  511.53   23.26
  -1  -1  12  535.11   23.21
  -1  -1  12  550.87   22.54
  -4   2   6   43.95   11.02
   4  -2  -6   48.81    8.78
  -4   2   6   58.25   19.01
  -6  -2  -4  575.05   30.98
   6   2   4  660.60   28.97
   6   2   4  557.23   28.28
  -1  -8   4  778.97   28.05
  -1  -8   4  728.92   30.00
   1   8  -4  509.51   18.70
   1   8  -4  795.85   34.90
   1   8  -4  746.91   33.19
   4  -4  -2  259.85    8.05
  -4   4   2  232.83   11.44
  -4   4   2  246.28   28.39
   4  -4  -2  288.81   15.57
  -4   1   7    4.36    8.64
   4  -1  -7    4.77    4.07
   4  -1  -7    1.84    3.44
  -4  -1   8  968.51   39.15
   4   1  -8  952.54   35.90
   4   1  -8  830.46   17.69
  -6  -2   0   98.47    9.77
  -6  -2   0  119.79    6.19
  -6  -2   0  115.37    7.92
   6   2   0   95.46    7.26
  -6  -2   0  117.67   14.60
   6   2   0  119.57    9.05
   6   1   2  823.00   32.72
   6   1   2  715.81   28.61
  -6  -1  -2  682.70   29.41
  -6  -1  -2  619.69   22.95
  -6  -1  -2  809.48   28.80
   6   3   0 1036.68   46.11
  -6  -3   0  954.77   35.10
  -6  -3   0  781.31   34.26
   6   3   0  768.67   33.08
   5   5  -4  120.53    8.18
  -5  -5   4  157.48    6.34
  -5  -5   4  170.81    6.03
  -5  -5   4  159.42   10.36
   5   5  -4  169.77   12.58
   5   6   5   23.92   15.58
  -5  -6  -5   28.06    4.73
   5   6   5   30.56   14.28
  -5  -6  -5   25.38    5.81
  -5  -6  -5   29.95   11.40
   3  -4  -6 1805.42   39.12
  -3   4   6 1837.50   43.87
  -3   4   6 1950.08   47.69
   3  -4  -6 1774.83   42.23
   3  -4  -6 1895.29   45.57
   6   3   4    2.91    6.34
  -6  -3  -4    0.53    1.80
  -6  -3  -4   -0.28    1.59
  -6  -3  -4    1.12    2.45
   0  -2 -12  634.77   26.01
   0  -2 -12  509.09   22.99
   0   2  12  612.78   32.39
   0   2  12  606.03   34.97
  -5  -4  -8  520.78   19.81
   5   4   8  503.67   20.29
   5   4   8  632.74   26.39
  -5  -4  -8  712.59   30.38
  -5  -4  -8  699.90   25.90
   5   4   8  730.85   28.39
   1  -4  11   92.79   11.70
   1  -4  11  105.47   24.53
  -1   4 -11   91.42   12.95
  -1   4 -11   96.75   12.92
   0   6   8  379.55   15.77
   0  -6  -8  358.58   11.76
   0   6   8  376.01    9.15
   0  -6  -8  351.43   13.32
   1   0 -12   18.13   11.64
  -1   0  12   18.80    7.08
  -1   0  12   16.61    6.27
   1   0 -12   17.16    7.76
  -6  -1  -3   15.55    6.12
   6   1   3    6.67    4.90
  -6  -1  -3   18.08    4.70
  -6  -1  -3   11.10    3.32
   6   1   3   13.16    5.13
   2   6   9 1191.00   35.30
   2   6   9 1110.57   39.54
   2   6   9 1064.93   23.68
  -2  -6  -9 1125.49   31.19
  -4  -3   8  654.82   28.18
   4   3  -8  583.22   25.16
  -4  -3   8  666.60   25.76
   4   3  -8  693.20   26.97
  -1  -4  11  357.26   13.28
   1   4 -11  226.30   10.20
  -1  -4  11  352.50   14.40
   1   4 -11  380.00   17.42
   3  -2  11   50.07    8.32
   3  -2  11   56.64   10.67
  -3   2 -11   62.40   28.84
  -3   2 -11   48.46   16.30
  -5  -4   5   24.08    5.95
  -5  -4   5   32.70   10.16
   5   4  -5   25.38    9.09
  -5  -4   5   28.73    6.94
   5   4  -5   31.06   10.18
   2   8  -4  860.19   29.97
  -2  -8   4  921.31   32.05
   2   8  -4  982.10   39.46
   2   8  -4  857.27   33.10
  -2  -8   4  866.06   35.01
   4   5   9 1628.02   34.63
  -4  -5  -9 2125.30   44.50
   4   5   9 1990.68   47.05
   4   5   9 1906.31   45.79
  -4  -5  -9 2112.65   49.62
   4  -3   8  302.42   13.75
   4  -3   8  312.85   19.17
  -4   3  -8  289.16   13.42
   4  -3   8  290.03   12.96
   4  -3   8  279.57    6.60
  -6  -1  -1   33.15    8.60
  -6  -1  -1   35.93    4.15
   6   1   1   40.03    8.18
   6   1   1   50.74   22.69
  -6  -1  -1   38.05    7.32
  -5  -5  -7  167.06   12.31
  -5  -5  -7  115.17    3.97
  -5  -5  -7  162.44    6.55
   5   5   7  172.95    8.57
   5   5   7  137.78   10.90
  -6  -4  -2    0.57    4.57
  -6  -4  -2    3.56    4.02
  -6  -4  -2    2.17    2.15
   6   4   2    6.23    4.82
   0  -8   3  783.26   29.36
   0   8  -3  731.68   28.91
   0  -8   3  721.79   30.45
   0   8  -3  783.35   38.86
  -1  -6   9 1445.29   36.53
  -1  -6   9 1516.57   38.88
   1   6  -9 1462.68   36.16
  -3  -5 -10  451.68   16.94
  -3  -5 -10  474.10   21.60
   3   5  10  436.76   13.16
   3   5  10  448.61   21.79
   3   5  10  403.36    7.32
   3   1  12  931.61   23.48
   3   1  12 1120.37   29.93
  -3  -1 -12 1139.07   29.94
  -3  -1 -12 1186.34   36.99
   1  -7  -4 2797.21   62.48
   1  -7  -4 2899.84   65.76
  -1   7   4 3147.15   71.35
  -1   7   4 2886.92   63.89
   0   7  -7  241.97   21.07
   0  -7   7  233.57   13.91
   0   7  -7  222.75    6.36
   0   7  -7  247.90   26.79
   0  -7   7  246.77   14.28
   6   4   1  299.01   12.34
  -6  -4  -1  261.30    9.36
   6   4   1  202.99   12.86
  -6  -4  -1  224.92    9.48
   0   6  -9 1915.93   46.14
   0  -6   9 1830.51   45.16
   0   6  -9 1815.00   20.96
   0   6  -9 1803.66   38.81
   0   6  -9 1935.29   33.14
   2  -2  12  508.56   20.22
  -2   2 -12  505.14   22.51
   2  -2  12  532.90   24.98
  -2   2 -12  540.62   24.44
   3   2 -10  206.10   11.68
  -3  -2  10  220.18   12.75
   3   2 -10  186.32    7.83
   3   2 -10  194.14    8.65
  -3  -2  10  237.12    8.09
   5   2   9  626.21   22.61
  -5  -2  -9  659.06   23.58
  -5  -2  -9  671.09   21.02
   5   2   9  702.79   18.53
  -5  -2  -9  600.14   15.93
  -5   2   2 1080.94   14.10
  -5   2   2 1027.73   17.45
   5  -2  -2 1127.18   14.60
   5  -2  -2 1236.67   22.28
  -5   2   2  915.64   30.16
   3   1 -10  447.87   19.86
  -3  -1  10  497.74   18.27
   3   1 -10  423.78   15.07
  -3  -1  10  513.39   22.91
   3   1 -10  450.98   18.91
  -1  -7  -7 2108.89   32.75
  -1  -7  -7 2084.44   30.88
   1   7   7 2032.76   24.44
   1   7   7 2049.71   22.10
   1   7   7 2336.29   34.07
  -6  -4  -3  197.44   10.79
  -6  -4  -3  194.52   11.34
   6   4   3  160.84    9.27
  -6  -4  -3  178.74    9.43
  -6  -4  -3  198.64    7.64
   0   7   6   24.39    9.26
   0  -7  -6   25.21   12.99
   0   7   6   24.40    9.72
   0  -7  -6   24.25   10.62
  -1  -2  12 1418.74   24.53
  -1  -2  12 1449.83   22.31
   1   2 -12 1381.19   24.87
   1   2 -12 1004.78   15.97
   2  -5   9 3363.04   44.87
  -2   5  -9 3499.20   51.87
  -2   5  -9 3409.05   50.60
   0  -8  -2  123.91    9.03
   0  -8  -2  130.96   13.54
   0   8   2  156.77   26.77
   0   8   2  140.21    7.28
   3  -5  -4  770.79   38.40
   3  -5  -4  697.39   22.88
  -3   5   4  720.69   25.93
  -3   5   4  692.13   24.40
   4   4  10   29.64    6.15
  -4  -4 -10   44.29   10.31
   4   4  10   22.38    7.72
  -4  -4 -10   38.59    8.39
   4   4  10   36.41   14.87
  -1   5 -10   31.21   10.21
   1  -5  10   39.17   14.05
  -1   5 -10   41.34   19.33
   1  -5  10   38.21   10.04
   3   7   7  347.15   17.34
  -3  -7  -7  355.08   30.94
   3   7   7  310.23   16.91
   5  -2   6  101.68    9.19
   5  -2   6  115.88   11.08
  -5   2  -6   99.44   11.31
  -1  -8  -4 1821.07   28.54
   1   8   4 2055.19   31.34
   1   8   4 1899.72   22.50
  -1  -8  -4 1776.28   40.08
   1   8   4 1754.48   20.24
   0   3 -12  116.06    6.82
   0  -3  12  116.91   18.17
   0  -3  12  129.50   23.68
   0   3 -12  137.88   14.73
   6   1   4   29.22   16.53
  -6  -1  -4   29.08    9.45
   6   1   4   34.30   15.46
   3  -5   7  267.29   11.78
   3  -5   7  292.91   14.99
  -3   5  -7  277.12   10.42
  -3   5  -7  276.06   13.30
  -4   4  -6  780.89   26.83
   4  -4   6  719.51   20.11
  -4   4  -6  815.26   23.10
   4  -4   6  782.41   25.64
   4  -4   6  830.03   41.39
  -3   4  -9   15.25   11.25
   3  -4   9    8.95    5.28
   3  -4   9    4.15    5.05
  -3   0 -12 1262.41   22.97
   3   0  12 1090.68   16.77
   3   0  12 1168.77   23.73
  -3   0 -12 1137.70   21.53
   5   1   9  285.76   12.40
  -5  -1  -9  314.65   18.27
  -5  -1  -9  303.30   12.66
  -2  -3 -12   10.87    6.33
   2   3  12    3.56   11.59
  -2  -3 -12   13.10    9.50
   2   3  12    4.41    7.50
  -4  -5   7  708.72   23.57
  -4  -5   7  448.98   12.64
  -4  -5   7  738.88   25.40
   4   5  -7  604.21   21.92
   4   5  -7  724.03   19.91
   2   7  -7   78.53   24.40
  -2  -7   7   64.93   12.52
   2   7  -7   75.63   32.50
  -3  -8   3  324.94   11.51
  -3  -8   3  335.62   33.06
   3   8  -3  353.46   23.42
  -3  -8   3  321.20   11.56
   3   8  -3  299.16   16.99
  -2  -3  11   30.36   12.63
   2   3 -11   37.81   16.60
  -2  -3  11   19.58    4.69
  -2  -3  11   25.29   14.62
   2   3 -11   24.59    8.53
  -3  -8  -4 2297.17   30.54
  -3  -8  -4 2310.04   33.13
   3   8   4 2788.54   38.02
  -4  -1 -11  537.00   22.94
  -4  -1 -11  473.56   18.50
   4   1  11  487.99   21.64
  -4  -1 -11  546.87   23.71
   4   1  11  422.02   17.26
   3   4  11  188.65   13.26
  -3  -4 -11  166.75   23.74
   3   4  11  166.45    5.51
   3   4  11  173.55   10.91
  -3  -4 -11  190.75    6.59
  -1  -3 -12  642.12   21.57
   1   3  12  744.60   25.36
  -1  -3 -12  734.76   27.56
   1   3  12  681.84   23.68
  -1   7  -6  193.42   16.56
   1  -7   6  182.10   13.24
   1  -7   6  185.27    7.21
  -1   7  -6  184.42   17.22
   2  -6   7  748.72   24.79
  -2   6  -7  780.94   25.06
  -2   6  -7  778.10   37.00
   2  -6   7  804.00   28.62
  -6  -1   0  732.04   23.08
  -6  -1   0  811.87   22.27
  -6  -1   0  688.70   25.83
   6   1   0  693.94   19.84
  -6  -1   0  836.48   23.04
   6   1   0  856.71   30.21
  -6  -2  -5  228.54   11.38
   6   2   5  230.62   13.32
   6   2   5  254.71   11.82
  -3  -7   6  451.06   21.73
   3   7  -6  443.58   19.18
   3   7  -6  521.76   32.79
  -5   0   5  805.24   26.53
   5   0  -5 1032.63   31.34
  -5   0   5  929.42   28.53
   1   6   9  595.87   21.37
   1   6   9  643.16   22.60
   1   6   9  622.89   33.38
  -1  -6  -9  581.70   21.27
   1   6   9  561.80   16.59
  -6  -2   1  127.18    9.38
  -6  -2   1  118.89    5.15
   6   2  -1  135.29   11.68
   6   2  -1  108.33    7.17
  -6  -2   1  117.07   15.39
  -4  -7   4   80.34   15.43
   4   7  -4   97.09    9.15
   4   7  -4   64.71    8.55
  -4  -7   4   71.47    2.86
  -4  -7   4   81.92    2.48
  -6  -3   1  243.69    8.28
   6   3  -1  223.88   10.15
  -6  -3   1  226.64   16.76
   6   3  -1  281.76   14.83
  -6  -3   1  270.44    8.08
   5  -1  -4   56.76   20.33
  -5   1   4   56.98   30.23
  -5   1   4   55.23    9.17
  -3  -2 -12 2183.93   35.33
   3   2  12 1758.67   23.54
  -3  -2 -12 2055.62   45.24
   3   2  12 2037.64   39.44
   6   4   0  182.46   17.48
  -6  -4   0  244.98    7.84
  -6  -4   0  217.00   28.86
   6   4   0  255.84   11.33
   3  -6   2    9.97    8.14
  -3   6  -2   13.58    6.38
  -3   6  -2   15.26    7.00
   3  -6   2   12.38   10.11
  -4  -2 -11    9.83    7.85
   4   2  11    5.84    7.68
  -4  -2 -11    6.72    3.82
  -4  -2 -11   10.85    7.29
   4   2  11   10.94    4.41
  -3   6  -1    5.26    7.42
   3  -6   1    2.79    6.07
   3  -6   1    1.97    4.24
  -3   6  -1    3.11    4.11
   1  -3  12    0.63    3.99
  -1   3 -12    1.85    6.73
  -1   3 -12    0.00    4.38
   1  -3  12    0.94    6.65
   2  -7   1 1533.29   24.87
   2  -7   1 1397.28   24.39
  -2   7  -1 1409.45   24.45
  -2   7  -1 1571.52   27.20
  -6  -3  -5   -0.53    1.26
  -6  -3  -5    3.93    5.02
  -6  -3  -5    4.53    9.13
   6   3   5    5.86    6.38
  -6  -3  -5    1.01    1.33
   4  -3  -5  426.44   15.46
   4  -3  -5  455.42   20.59
  -4   3   5  391.16   18.46
  -4   3   5  410.72   20.62
   4  -3  -5  393.68   14.37
  -2   7  -2  672.41   31.70
   2  -7   2  685.73   23.37
  -2   7  -2  632.61   23.19
   2  -7   2  661.85   23.05
   6   4   4  112.05   10.42
  -6  -4  -4  143.33   18.51
  -6  -4  -4  133.08    8.34
  -6  -4  -4  125.52   11.52
  -6  -4  -4  131.75    5.37
  -2   5   7   77.63   16.59
   2  -5  -7   82.58   12.54
   2  -5  -7   70.56    8.58
  -2   5   7   85.53   13.45
   4   6   8   78.40   27.16
   4   6   8   92.03   17.21
  -4  -6  -8   85.26   12.09
   5   3   9 3612.00   39.18
  -5  -3  -9 3578.74   43.67
   5   3   9 3282.47   42.14
   3   6   9    4.49    7.51
   3   6   9    7.36    7.06
  -3  -6  -9   -0.50    7.96
   1  -6  -7 1538.09   25.85
   1  -6  -7 1504.09   22.91
  -1   6   7 1522.28   26.60
  -1   6   7 1682.15   29.18
  -4  -7  -6 2563.69   35.34
   4   7   6 2221.07   36.62
   4   7   6 2756.99   35.92
  -4  -6   6  425.05   11.31
  -4  -6   6  612.82   15.91
   4   6  -6  556.00   20.56
  -4  -6   6  637.25   23.32
  -4  -6   6  624.65   21.65
   5   6  -3  115.66    8.69
  -5  -6   3  100.31    5.02
  -5  -6   3  117.69    6.23
  -5  -6   3   93.97    8.69
  -5  -6   3  129.28   29.85
   4   0  -8  408.32   34.84
   4   0  -8  483.62   21.37
  -4   0   8  476.90   27.63
   1  -1 -12 1031.21   24.71
  -1   1  12 1073.96   24.96
  -1   1  12 1002.63   14.24
   1  -1 -12  876.86   18.66
   2  -7   0 6635.34   42.48
  -2   7   0 5961.38   48.97
  -2   7   0 6552.24   71.01
   2  -7   0 5885.94   64.49
  -3   6  -3    7.50    9.09
  -3   6  -3    7.75    6.21
   3  -6   3    9.05    9.80
   3  -6   3    8.23    4.77
   2  -1 -11  179.54   12.93
   2  -1 -11  171.55    5.55
   2  -1 -11  162.13   29.27
  -2   1  11  179.49    8.38
  -2   1  11  171.65   20.86
   3   3 -10 1644.64   21.05
  -3  -3  10 1727.19   28.75
  -3  -3  10 1732.74   21.89
   3   3 -10 1594.23   28.42
   3  -6   0   48.36   11.41
  -3   6   0   57.25    8.83
   3  -6   0   56.27    8.62
  -3   6   0   67.72   26.70
   1  -4 -10  543.86   21.06
  -1   4  10  554.49   22.92
  -1   4  10  547.08   19.88
   1  -4 -10  562.45   31.49
  -1   0 -13  864.72   30.80
   1   0  13  784.66   26.16
   1   0  13  837.04   28.17
  -1   0 -13  750.81   29.69
  -5   1  -8   59.65   11.48
   5  -1   8   77.56   31.47
   5  -1   8   66.40    9.23
   0   8  -4 1080.19   18.13
   0   8  -4 1163.07   36.37
   0  -8   4 1110.43   23.12
   0  -8   4 1154.73   12.82
   0   8  -4  870.97   13.35
   2   8   5    8.64    7.07
   2   8   5    2.59    1.56
  -2  -8  -5    3.60    4.91
  -2  -8  -5    5.40    9.81
  -3   0  10  141.22   12.87
   3   0 -10  132.58   13.56
   3   0 -10  114.68    8.18
   3   0 -10  127.51    3.91
  -3   0  10  120.76    4.14
   5   2  -6  264.76   13.92
  -5  -2   6  356.11   32.86
   5   2  -6  341.88   17.55
  -4   0 -11 1636.53   28.26
   4   0  11 1603.78   28.33
  -4   0 -11 1667.83   30.05
   1   8  -5  130.18   14.42
  -1  -8   5  121.68    6.05
  -1  -8   5  139.86   23.06
   1   8  -5  142.22   15.65
   1   8  -5   90.39    5.13
   4  -4  -3  295.26   15.08
  -4   4   3  232.77   12.63
  -4   4   3  275.11   15.47
  -4   4   3  243.54    6.81
   4  -4  -3  261.52   13.71
   6   1   5   49.55   20.95
   6   1   5   39.50   12.59
  -6  -1  -5   57.27   26.01
  -2   7  -3 1640.74   34.38
   2  -7   3 1534.51   25.35
  -2   7  -3 1500.79   26.08
   2  -7   3 1658.14   28.52
  -5   3  -2   87.98   10.26
   5  -3   2   66.68   11.93
  -5   3  -2   78.10   27.70
   5  -3   2   88.11   17.11
   5  -3   2  108.49   11.84
   4   4  -8  381.31   17.82
  -4  -4   8  440.24   21.69
  -4  -4   8  417.64   16.21
  -4  -4   8  281.61   11.79
   4   4  -8  302.25   13.21
   4   4  -8  438.30   17.12
  -5  -6  -6  331.32   11.74
  -5  -6  -6  382.29   18.98
  -5  -6  -6  392.31   13.75
   5   6   6  420.11   17.70
   5   6   6  323.23   21.52
  -2   6   5  261.97   13.68
   2  -6  -5  242.83    8.72
   2  -6  -5  265.36   14.17
  -2   6   5  283.53   22.01
  -5  -7  -1   -0.79    1.98
   5   7   1   -0.38    2.72
  -5  -7  -1    3.83    8.54
   5   7   1   -3.25    6.62
  -5  -7  -1    2.54    2.36
  -4  -8  -1   42.49   11.69
   4   8   1   52.64   15.59
   4   8   1   40.32   11.10
  -4  -8  -1   59.76   12.36
  -4  -8  -1   45.78    6.09
   5   3  -6  117.47    9.19
   5   3  -6   84.70   10.95
  -5  -3   6  118.84   14.75
  -5  -3   6   96.23    4.47
  -5  -3   6  112.65    3.49
   0  -8  -3   66.96   12.92
   0   8   3   88.38   29.03
   0   8   3   70.26    6.87
   0  -8  -3   78.98   20.87
   6   0   2  411.44   16.57
  -6   0  -2  398.15   21.53
  -6   0  -2  343.24   13.83
  -6   0  -2  454.33   17.26
   6   0   2  452.21   20.33
   0  -4 -11  689.72   23.49
   0  -4 -11  748.85   23.03
   0   4  11  738.13   25.67
   0   4  11  733.11   23.92
  -5  -7  -2   37.53    4.65
  -5  -7  -2   43.65    8.29
   5   7   2   48.19   17.10
  -5  -7  -2   24.11   10.04
  -5  -7  -2   31.43   10.10
   1  -3 -11   68.18   12.02
   1  -3 -11   65.28    9.60
  -1   3  11   71.70   12.96
  -1   3  11   58.58   10.50
   5  -3   3  330.73   14.54
  -5   3  -3  264.24   15.68
  -5   3  -3  292.88    7.52
   5  -3   3  296.44   10.42
   5  -3   3  237.68    6.42
  -5   3  -1  176.24   18.82
   5  -3   1  239.45   15.76
   5  -3   1  189.26   12.44
  -5   3  -1  216.29    9.10
  -2  -5  10   25.78    8.27
  -2  -5  10   23.30    8.73
   2   5 -10   14.49    4.59
   2   5 -10   15.82    5.06
   2   5 -10   18.40    9.67
  -4  -8   0 1691.56   19.83
   4   8   0 1858.01   29.17
   4   8   0 1358.79   17.60
  -4  -8   0 1535.63   28.21
  -6  -1   1  124.66    5.72
   6   1  -1  144.52   17.54
  -6  -1   1  118.15    7.47
   6   1  -1  104.83    6.44
  -6  -1   1  118.06   11.20
   6   0   3  252.64   15.34
   6   0   3  220.06    8.07
  -6   0  -3  257.99    3.47
  -6   0  -3  215.22   27.98
  -6  -4   1  136.25    8.57
  -6  -4   1   96.80    8.78
   6   4  -1  135.86    9.23
  -6  -4   1  105.69    6.67
   1   1  13 1466.26   24.04
   1   1  13 1409.02   24.10
  -1  -1 -13 1574.81   28.07
  -1  -1 -13 1371.99   34.71
  -5   0  -9   85.66   15.41
  -5   0  -9   91.40   12.30
   5   0   9   88.68   10.85
  -1   1 -13  243.30   13.82
   1  -1  13  250.29   11.55
  -1   1 -13  270.27   14.00
   1  -1  13  264.36   15.50
   3  -3  -8   27.66    8.62
   3  -3  -8   16.97    4.30
   3  -3  -8   16.85    7.34
  -4  -8  -2  126.91    9.66
   4   8   2  156.32   13.23
  -4  -8  -2  137.33    3.53
  -4  -8  -2  119.80   25.70
   4   8   2  122.74    5.41
  -3   1 -12  163.06   16.42
   3  -1  12  148.46   24.72
  -3   1 -12  149.72   12.53
   3  -1  12  137.16    6.84
  -3  -5   9 1461.23   26.86
   3   5  -9 1381.39   15.05
  -3  -5   9 1370.01   21.56
   2   8  -5  513.25   25.31
   2   8  -5  583.19   26.44
  -2  -8   5  484.14   22.45
   2  -7  -1  226.73   15.15
  -2   7   1  232.63   14.71
  -2   7   1  199.98   13.50
   2  -7  -1  205.55   12.18
   5   7   0    1.40    2.88
   5   7   0   10.86    9.81
  -5  -7   0    2.18    4.00
  -5  -7   0    3.18    7.21
   6   0   1  170.52   11.50
  -6   0  -1  148.70    6.60
   6   0   1  190.32   11.26
  -6   0  -1  157.90   17.41
   0   5  10  849.23   33.42
   0  -5 -10  814.96   27.47
   0   5  10  870.38   29.04
   0  -5 -10  810.39   27.21
   3  -2  -9 2395.44   23.94
   3  -2  -9 2343.12   52.26
   3  -2  -9 2067.45   21.01
   3  -2  -9 2289.34   33.71
   2   6  -9   31.14   15.65
  -2  -6   9   28.49   10.71
  -2  -6   9   26.70    9.13
  -4  -3 -11  160.80   14.62
   4   3  11  161.92   14.56
  -4  -3 -11  164.25   17.38
   4   3  11  131.42    9.02
  -3   6  -4   62.37   20.39
   3  -6   4   58.19   19.51
   3  -6   4   63.91   12.05
  -3   6  -4   61.77   11.38
  -1  -3  12   26.47   10.52
  -1  -3  12   16.84    8.57
   1   3 -12   15.39    7.65
   1   3 -12    5.14    3.02
  -3  -6   8   50.02    9.34
  -3  -6   8   57.14   10.79
   3   6  -8   38.02    8.67
  -6  -4  -5   42.82   27.17
   6   4   5   44.63   14.46
  -6  -4  -5   32.53    6.21
  -6  -4  -5   41.89    8.97
   6   4   5   33.73   14.73
  -5  -1   6   17.09    8.48
   5   1  -6    7.87    4.11
   5   1  -6    8.06    5.21
  -3   6   1   96.72   10.97
   3  -6  -1  113.16   13.56
  -3   6   1  104.22   17.88
   3  -6  -1   99.04   18.71
  -6  -2  -6   96.29   11.30
  -6  -2  -6  100.53   12.18
   6   2   6   94.37   23.86
  -5  -7  -3  168.63    4.72
  -5  -7  -3  153.88    7.15
   5   7   3  181.32   12.81
  -5  -7  -3  173.01   17.86
   6   5   2  271.00   13.77
  -6  -5  -2  290.77   13.38
  -6  -5  -2  336.32   17.17
   6   5   2  369.42   15.63
  -5   2   3 1222.79   23.23
  -5   2   3 1278.85   14.74
   5  -2  -3 1499.48   25.23
  -5   2   3 1290.25   22.21
   5  -2  -3 1358.49   15.06
   1  -5  -9   34.86   14.58
  -1   5   9   35.71   12.36
   1  -5  -9   28.53   12.61
  -1   5   9   26.29    6.67
  -6  -3   2   90.29    6.74
  -6  -3   2   93.03   22.77
  -6  -3   2  104.84    9.11
   6   3  -2  104.08    9.15
  -6  -3   2   88.92    5.21
  -6  -2   2    3.57    4.89
  -6  -2   2   -1.23    4.70
  -6  -2   2    0.88    1.11
   6   2  -2   -0.10    6.68
  -3  -8   4 1529.80   28.33
   3   8  -4 1451.98   22.14
   3   8  -4 1725.65   31.45
   5   5  -5  368.49   14.76
  -5  -5   5  353.92   15.27
   5   5  -5  276.76   15.21
  -5  -5   5  339.05   13.10
  -5  -5   5  363.10   21.14
  -3  -8  -5  272.86   15.72
   3   8   5  321.02   16.07
  -3  -8  -5  286.04   16.20
  -4   2 -10 3464.65   48.59
  -4   2 -10 3434.83   46.17
   4  -2  10 3490.77   46.79
   4  -2  10 3282.49   35.40
   0   0 -13  206.13   10.67
   0   0 -13  258.56   27.31
   0   0  13  228.25   12.05
   0   0  13  236.87    9.97
   5  -3   4  100.78    5.41
   5  -3   4  141.59   11.99
  -5   3  -4  129.72   22.26
  -5   3  -4  130.95    9.55
   5  -3   4  137.61   17.82
   6   5   1  693.15   21.45
  -6  -5  -1  880.62   27.97
  -6  -5  -1  833.79   26.97
  -6  -5  -1  693.91   21.73
  -2   0 -13  253.00   14.70
   2   0  13  239.42   10.64
   2   0  13  257.56   13.96
  -2   0 -13  279.37   14.08
   5  -2   7    5.01    8.94
  -5   2  -7    4.30    5.49
   5  -2   7    7.28    7.45
  -4  -8   1   49.28    7.80
   4   8  -1   61.56   22.13
  -4  -8   1   45.57    5.69
   4   8  -1   39.36   11.75
  -4  -8   1   53.05   31.45
  -4  -8   1   41.38    9.89
  -1   6  -9    5.36    4.22
   1  -6   9    9.89    8.91
  -1   6  -9    2.42    7.66
  -1   6  -9    3.54    6.09
  -6   0  -4  377.08   29.23
   6   0   4  389.24   19.34
   6   0   4  429.01   20.58
  -6  -3  -6   18.56   13.37
   6   3   6   22.85    7.25
  -6  -3  -6   19.04    2.19
  -6  -3  -6   16.76    1.77
  -6  -3  -6   26.23   13.23
  -5   3   0  233.76   22.21
  -5   3   0  231.90   11.62
   5  -3   0  256.54   13.14
   5  -3   0  277.48   14.99
  -2  -1 -13    2.56    7.30
  -2  -1 -13    6.71    7.43
   2   1  13    6.03    9.23
   2   1  13    3.11    6.40
   0  -1  13  171.05   13.93
   0  -1  13  155.42   11.51
   0   1 -13  137.66    8.53
   0   1 -13  159.69   14.77
   2   7   8  477.36   16.28
  -2  -7  -8  476.04   19.44
   2   7   8  540.10   22.85
   2   7   8  504.90   22.93
   1   8   5  359.62   13.43
   1   8   5  384.00   14.92
   1   8   5  413.68   21.36
  -1  -8  -5  367.16   41.48
  -1  -8  -5  391.37   20.15
  -1   7   5  918.69   30.27
   1  -7  -5  814.41   29.80
  -1   7   5  872.83   26.38
   1  -7  -5  845.96   32.39
  -2   7  -4  905.90   29.19
  -2   7  -4 1018.53   32.24
   2  -7   4  906.87   28.78
   2  -7   4 1006.90   30.17
   3   3  12  487.31   17.59
  -3  -3 -12  561.11   11.95
  -3  -3 -12  577.29   20.55
   3   3  12  564.60   22.59
   6   5   3  646.66   23.46
   6   5   3  456.59   17.48
  -6  -5  -3  552.73   17.98
  -6  -5  -3  599.34   22.03
   1   7  -8  856.55   38.83
  -1  -7   8  788.79   33.68
   1   7  -8  811.80   30.06
  -4   4  -7   52.00    7.29
   4  -4   7   49.65    8.54
  -4   4  -7   58.13   10.81
   4  -4   7   72.03   16.77
   4  -4   7   65.07   32.73
   5   5   8   65.52    6.45
  -5  -5  -8   67.45   31.60
   5   5   8   61.69   10.38
  -5  -5  -8   56.04    5.60
   4   8   3  224.04   13.10
  -4  -8  -3  161.89   11.26
  -4  -8  -3  190.12   14.07
   6   0   0   24.61   11.42
  -6   0   0   13.33    5.53
   6   0   0   18.24    6.67
  -6   0   0   18.05    4.40
   6   0   0   24.06    4.49
  -6   0   0   25.24   10.03
   5   7  -1 1073.08   19.41
  -5  -7   1 1235.50   22.07
  -5  -7   1 1342.29   19.04
   5   7  -1 1432.47   32.91
   0   3  12  100.99   15.72
   0   3  12  112.16   10.02
   0  -3 -12  110.32   19.31
   0  -3 -12   98.05    9.74
   5   4   9 2490.57   35.91
   5   4   9 2810.90   32.92
   5   4   9 2010.24   23.72
  -2   3  10 1492.05   41.40
   2  -3 -10 1393.40   32.79
   2  -4  11   23.69    8.52
  -2   4 -11   23.48   10.25
  -2   4 -11   17.56    5.79
   2  -4  11   23.98    6.66
  -4   5  -2  695.50   22.28
   4  -5   2  649.27   21.47
   4  -5   2  730.33   26.26
  -4   5  -2  614.17   22.48
  -3   5   5   19.38   11.30
  -3   5   5   18.89    8.74
   3  -5  -5   14.43    9.78
   3  -5  -5   18.39    5.69
   4  -3   9 1441.34   18.63
  -4   3  -9 1489.96   26.87
   4  -3   9 1388.45   17.42
   4  -3   9 1513.02   29.93
   4  -3   9 1450.55   25.78
  -6  -5   0   45.81   17.74
  -6  -5   0   54.38   16.51
  -6  -5   0   52.00    7.02
  -6  -5   0   45.89    8.25
   5   4  -6   -2.78    4.06
  -5  -4   6    0.70    2.02
   5   4  -6    6.41    8.44
  -5  -4   6    2.15    8.48
  -5  -4   6    0.98    3.21
   6   1   6  426.85   29.16
  -6  -1  -6  402.42   31.22
   6   1   6  460.52   21.84
  -2  -4  11  215.24   22.33
  -2  -4  11  211.42   11.98
   2   4 -11  180.59    7.59
   2   4 -11  191.54   11.56
  -2  -4  11  188.92    5.33
  -4   5  -1  549.17   21.58
  -4   5  -1  629.71   29.13
   4  -5   1  609.90   20.51
   4  -5   1  662.85   23.05
   0   8  -5  377.59   38.38
   0  -8   5  349.03   19.34
   0  -8   5  344.68   13.76
   0   8  -5  258.52   10.75
   0   8  -5  343.55   17.81
  -1   7  -7   99.22   13.11
   1  -7   7  107.28    8.35
   1  -7   7   86.36   16.60
  -1   7  -7   93.99    9.72
   2   5  11 1583.84   26.88
   2   5  11 1571.82   27.88
   2  -4  -9  374.26   19.26
   2  -4  -9  365.63   17.43
   2  -4  -9  368.34   14.85
  -2   4   9  396.65   21.56
  -3   5  -8  309.94   14.73
   3  -5   8  311.77   13.40
  -3   5  -8  287.82   15.74
   3  -5   8  308.47   26.40
  -4   2   7    5.57    2.69
  -4   2   7   10.91   13.30
   4  -2  -7    8.90    7.95
   4   7  -5  348.76   20.75
  -4  -7   5  327.66   16.83
   4   7  -5  277.19   14.34
   0   5 -11   24.31    7.03
   0  -5  11   33.84   13.37
   0  -5  11   43.40   14.20
   0   5 -11   25.42   10.23
   0   5 -11   44.46   11.57
  -2   7   2  433.58   23.64
   2  -7  -2  445.05   38.90
  -2   7   2  408.33   18.97
   2  -7  -2  405.21   18.21
  -1   8  -1   69.45   12.16
   1  -8   1   61.13   10.96
   1  -8   1   68.01   10.58
  -1   8  -1   56.56    8.82
   5   7   4    4.91    6.99
  -5  -7  -4    0.87    0.62
  -5  -7  -4    3.62    6.32
   5   7   4    7.77    7.03
  -5  -7  -4    3.15    1.93
   5   6  -4  233.11   10.14
  -5  -6   4  316.92   14.59
  -5  -6   4  313.15   18.91
  -5  -6   4  291.92   13.63
  -5  -6   4  290.09    6.81
   4  -5   3  115.40   12.24
  -4   5  -3  103.17    7.93
  -4   5  -3  107.98   12.10
   4  -5   3  113.01   18.74
   3  -4  -7 1316.78   26.80
  -3   4   7 1351.44   26.97
   3  -4  -7 1182.14   18.96
   3  -4  -7 1268.08   16.82
   0   7  -8 1418.48   28.58
   0   7  -8 1253.62   15.52
   0   7  -8 1323.30   18.08
   0   7  -8 1370.40   31.76
   0  -7   8 1351.70   29.50
   6   5   4   96.91   10.34
   6   5   4  126.51    8.99
  -6  -5  -4  124.47   15.27
  -6  -5  -4  108.02    6.30
   3   4 -10  395.54   18.99
   3   4 -10  417.11   16.26
  -3  -4  10  347.99   14.57
  -3  -4  10  448.44   22.72
  -3  -4  10  420.13   19.00
   0  -1 -13  454.18   21.29
   0   1  13  545.39   20.35
   0  -1 -13  553.81   22.03
   0   1  13  555.90   29.80
   4  -1  11  831.47   22.51
   4  -1  11  816.43   22.78
   4  -1  11  873.42   28.24
  -4   1 -11  930.42   45.65
  -4   1 -11  873.53   29.82
   2  -1  13   67.03    8.46
  -2   1 -13   62.96   27.99
   2  -1  13   78.34   14.80
  -2   1 -13   69.01   12.56
   6   4  -2  323.49   10.99
  -6  -4   2  309.20   15.45
  -6  -4   2  277.20   11.83
  -6  -4   2  240.11   11.75
   2  -3  12  240.39   16.75
  -2   3 -12  237.89    9.90
   2  -3  12  263.97   25.35
  -2   3 -12  246.74   13.42
   0   7   7  141.93   19.30
   0  -7  -7  135.48   19.40
   0  -7  -7  134.70   11.91
   0   7   7  139.65   11.09
   1  -8   0  952.24   29.94
   1  -8   0 1020.29   34.73
  -1   8   0  978.67   29.70
  -1   8   0 1069.47   36.04
  -6  -1   2   68.54    3.78
  -6  -1   2   53.15    6.83
   6   1  -2   58.54    8.12
  -6  -1   2   60.85   13.54
   6   1  -2   66.01   29.76
   3   7   8   20.78   11.20
   3   7   8   18.57    7.44
  -3  -7  -8   17.71   13.78
  -3   6  -5   84.25   11.44
  -3   6  -5   72.90   14.53
   3  -6   5   74.99   10.41
   3  -6   5   75.82   10.42
   6   0   5  121.89    9.07
   6   0   5  143.84   11.64
  -6   0  -5  137.05   15.69
   1  -8   2  471.32   19.81
  -1   8  -2  500.87   26.30
   1  -8   2  445.93   21.02
  -1   8  -2  442.22   19.90
  -4  -8   2   69.52   31.28
  -4  -8   2   54.71    4.82
  -4  -8   2   48.85    4.96
   4   8  -2   54.42    5.68
   4   8  -2   66.52    9.52
  -1  -2 -13  599.92   23.58
  -1  -2 -13  684.32   23.60
   1   2  13  619.31   22.50
   1   2  13  630.27   21.93
   2  -6   8 1334.62   20.19
   2  -6   8 1256.43   24.66
  -2   6  -8 1295.60   23.78
  -2   6  -8 1296.38   24.27
   3  -3  11    6.51    8.21
  -3   3 -11    6.55    8.18
  -3   3 -11    3.44    4.38
   3  -3  11    1.81    9.16
   1  -2  13   22.55   10.99
  -1   2 -13   18.83    8.74
  -1   2 -13   24.04   11.86
   1  -2  13   16.99    7.02
   5  -3   5   -0.83    8.18
   5  -3   5    0.29    2.43
  -5   3  -5    3.84    5.52
  -5   3  -5    1.24    1.59
   5  -3   5    2.35    4.11
   0   8   4   10.49    5.06
   0  -8  -4    5.27    8.88
   0   8   4   19.73    6.53
   0  -8  -4    2.22    5.94
  -4  -7  -7 1223.61   24.13
   4   7   7 1087.02   23.07
   4   7   7 1269.64   21.95
  -3   6   2   60.18   26.93
   3  -6  -2   52.09   22.06
  -3   6   2   49.15   13.37
   3  -6  -2   60.27   17.45
  -4  -2   9  329.09   18.57
   4   2  -9  323.70   15.24
  -4  -2   9  322.32   12.09
   4   2  -9  302.12   18.28
   3  -1 -10  886.47   23.39
  -3   1  10  967.94   31.86
   3  -1 -10  883.16   32.93
   3  -1 -10  827.04   29.03
  -5   3   1    3.70    6.73
  -5   3   1    8.68    9.33
  -5   3   1    2.33    2.87
   5  -3  -1   -2.17    8.53
   5  -3  -1    1.11    2.73
   4  -1  -8  125.21   29.44
   4  -1  -8  125.01   10.01
  -4   1   8  123.42   12.48
  -1   2  12  337.04   15.42
  -1   2  12  340.61   17.63
   1  -2 -12  308.90   17.49
   1  -2 -12  328.29   18.87
  -5   1   5  981.92   18.35
  -5   1   5  898.49   28.09
   5  -1  -5 1103.33   19.79
  -2  -2 -13   52.25   26.85
   2   2  13   49.66   14.35
  -2  -2 -13   47.64   11.07
   2   2  13   46.17   11.31
   0   2 -13   15.54    6.66
   0  -2  13   21.54   15.94
   0   2 -13    8.52    8.68
   0  -2  13   13.90   10.60
   4   5  10 2099.70   50.20
   4   5  10 2100.10   28.05
   4  -5   0  550.49   22.95
   4  -5   0  658.11   37.40
  -4   5   0  547.82   13.11
  -4   5   0  523.76   19.79
   1   7   8  434.28   16.32
  -1  -7  -8  437.91   29.51
   1   7   8  496.17   23.38
  -1  -7  -8  420.08   29.34
   1   7   8  439.85   16.78
  -5  -2 -10    0.65    1.07
  -5  -2 -10    6.08    5.62
  -5  -2 -10    9.00    8.51
   5   2  10    2.99   11.43
   5   2  10    3.56    3.93
   0   4 -12    1.32    1.82
   0  -4  12    4.93    6.24
   0  -4  12    2.03    9.62
   0   4 -12    4.26    6.63
   6   4   6  354.23   13.53
  -6  -4  -6  268.79   10.40
  -6  -4  -6  339.07   18.05
  -6  -4  -6  325.03   14.09
   6   4   6  288.51   15.28
  -2  -8  -6   34.40   10.96
  -2  -8  -6   36.61   11.73
   2   8   6   56.87   17.43
   0   6   9   75.34   29.62
   0  -6  -9   61.71    8.45
   0   6   9   62.80    7.90
   0  -6  -9   56.97   30.54
  -2  -4 -12  124.22   12.91
  -2  -4 -12  131.46    6.86
   2   4  12  117.31   10.21
   2   4  12  114.04   21.66
  -4  -8  -4  361.82   19.06
  -4  -8  -4  414.78   20.27
   4   8   4  461.17   22.67
   1   8  -6   37.61   15.13
  -1  -8   6   26.71    4.65
  -1  -8   6   38.57   15.33
   1   8  -6   21.22    5.66
   1   8  -6   40.82   12.78
  -4   4   4  220.77   26.96
   4  -4  -4  249.97   23.09
   4  -4  -4  220.94    8.64
   4  -4  -4  203.56    8.06
  -4   4   4  215.13   13.74
  -1  -5  11   41.55    9.50
   1   5 -11   33.32    6.26
   1   5 -11   23.41    8.76
   1   5 -11   55.28   24.25
  -1  -5  11   44.05   13.02
  -5  -6  -7  305.11   17.37
   5   6   7  339.31   15.59
  -5  -6  -7  337.14   11.95
  -5  -6  -7  286.62   10.15
   5   6   7  267.09   16.32
   3   7  -7   66.40    9.97
  -3  -7   7   69.81   11.32
   3   7  -7   68.59   33.75
   6   0  -1    2.71    6.09
  -6   0   1    4.39    4.81
  -6   0   1    0.33    1.88
   6   0  -1    2.31    2.75
  -6   0   1    4.35   10.31
  -1  -5 -11   21.72   10.42
   1   5  11    8.20    8.70
   1   5  11   27.03   11.74
  -1  -5 -11   13.69    7.64
  -2  -6 -10 1564.45   17.70
   2   7  -8  219.15   17.80
   2   7  -8  208.37   29.48
  -2  -7   8  209.73   12.40
   5   1  10  601.39   22.11
  -5  -1 -10  630.00   23.64
   5   1  10  638.41   16.66
  -5  -1 -10  632.67   21.76
   2  -7   5 1491.82   25.12
  -2   7  -5 1390.16   25.84
  -2   7  -5 1476.10   25.52
   2  -7   5 1378.70   25.36
   4  -5   4 1153.94   36.49
   4  -5   4 1068.68   18.85
  -4   5  -4 1172.66   32.94
  -4   5  -4 1045.60   26.92
  -4  -1   9 1131.89   23.55
   4   1  -9  967.11   22.42
   4   1  -9 1060.25   26.42
  -6  -5   1   31.17    7.99
   6   5  -1   39.02   14.20
  -6  -5   1   40.33   14.90
  -6  -5   1   33.45    9.65
   5   0  -6  514.93   21.91
   5   0  -6  440.32   20.04
  -5   0   6  488.93   28.60
   2  -5  10  513.09   22.47
   2  -5  10  523.94   25.06
  -2   5 -10  520.40   23.71
  -2   5 -10  498.74   26.46
   5   7  -2 3286.77   38.30
  -5  -7   2 4053.13   53.80
  -5  -7   2 4352.32   44.93
  -5  -7   2 4392.74   44.49
   5   7  -2 4826.87   55.64
  -1   8   1  260.58   19.83
   1  -8  -1  286.90   14.12
  -1   8   1  284.69   29.68
   1  -8  -1  259.83   31.83
   3  -4  10  165.34   13.63
   3  -4  10  157.93    7.70
  -3   4 -10  180.30   14.80
  -3   4 -10  165.65   11.13
  -2   2  11   10.79    6.39
   2  -2 -11   16.89   12.38
   2  -2 -11   13.88    5.77
   2  -2 -11    7.71    7.02
  -2   2  11   16.53    9.35
   1  -8   3   95.22   11.11
  -1   8  -3  113.41   16.63
   1  -8   3  101.85    8.86
  -1   8  -3   88.69   11.07
   4  -3  -6   17.32   10.23
  -4   3   6    9.55    7.49
   4  -3  -6   12.08    4.07
  -4   3   6   13.08    7.91
   4  -3  -6   11.28    4.70
   4   3  -9  184.60   12.18
   4   3  -9  136.34    5.11
  -4  -3   9  209.96    6.75
  -4  -3   9  208.64   19.84
   4   3  -9  207.45    9.87
   2   1 -12  289.59   16.75
  -2  -1  12  290.58   28.42
   2   1 -12  229.04    9.25
  -2  -1  12  318.78   14.78
  -6  -2  -7  119.22   12.32
   6   2   7  127.98   12.27
  -6  -2  -7  134.29   13.82
   0  -6  10  801.27   28.64
   0  -6  10  802.77   27.82
   0   6 -10  771.98   21.60
   0   6 -10  743.38   20.86
   0   6 -10  793.10   27.14
   1   6 -10  515.56   17.71
  -1  -6  10  523.75   24.93
  -1  -6  10  494.46   21.49
   1   6 -10  509.92   23.01
  -5   1  -9  144.60   13.82
   5  -1   9  134.68   13.51
  -5   1  -9  133.43   12.82
   2   9   0  157.45   12.02
  -2  -9   0  131.35    7.80
  -2  -9   0  133.78   11.80
   2   9   0  136.96   12.95
  -6  -3   3  473.12   17.47
   6   3  -3  545.52   22.85
  -6  -3   3  474.52   17.94
  -6  -3   3  504.66   27.35
  -6  -3   3  412.04   25.79
   1   4  12   78.34   16.71
  -1  -4 -12   68.19   10.36
  -1  -4 -12   64.16   15.78
   1   4  12   70.55   11.45
  -4  -6  -9  476.17   31.03
   4   6   9  423.63   20.07
   4   6   9  455.27   19.31
   4   5  -8  110.20   25.66
  -4  -5   8   88.13    5.89
  -4  -5   8  122.68    8.12
  -4  -5   8  151.53   14.52
   4   5  -8  131.18   10.34
   6   2  -3  620.32   16.24
  -6  -2   3  536.17   14.96
  -6  -2   3  561.95    5.99
  -6  -2   3  458.97   15.14
  -6  -2   3  576.99   21.43
  -4  -6   7   46.97    2.43
   4   6  -7   58.58   27.50
  -4  -6   7   55.12    2.08
  -4  -6   7   69.29   10.58
  -4  -6   7   60.75   11.05
  -3   2 -12  470.09   21.97
   3  -2  12  477.96   23.96
   3  -2  12  386.37   21.14
  -3   2 -12  487.73   25.98
  -3  -5 -11 1064.67   26.06
   3   5  11  987.08   28.89
  -3  -5 -11 1038.82   14.28
   3   5  11  982.90   22.59
  -4  -4 -11   48.32   30.19
  -4  -4 -11   44.46   12.95
   4   4  11   49.04   14.46
   4   4  11   41.41    9.29
   4   4  11   32.95    4.72
   2   8  -6  105.04   26.37
  -2  -8   6  105.44   14.54
   2   8  -6   99.36   15.45
   6   3   7   46.75    9.42
  -6  -3  -7   43.34    2.05
  -6  -3  -7   38.21    3.34
  -6  -3  -7   54.98    8.21
  -6  -3  -7   55.66   22.53
  -2  -9  -1  578.95   22.29
   2   9   1  724.14   25.95
  -2  -9  -1  587.22   18.61
   2   9   1  614.26   18.17
  -2  -9  -1  631.76   18.03
   6   5   5  252.30    7.41
  -6  -5  -5  229.79   13.53
   6   5   5  199.95   15.73
  -6  -5  -5  237.30    8.96
  -2  -2  12  141.60   10.96
   2   2 -12  133.93   17.27
  -2  -2  12  138.56   16.73
   2   2 -12  111.11   12.00
   5   3  10 1326.32   30.05
   5   3  10 1433.59   20.00
  -5  -3 -10 1469.19   28.55
  -5  -3 -10 1419.34   20.05
  -2  -9   1  175.66    7.50
  -2  -9   1  170.90   11.97
   2   9  -1  161.54    7.77
   2   9  -1  213.31   13.84
   2   9  -1  169.86   12.04
   2  -6  -6  481.13   11.16
   2  -6  -6  529.35   36.69
  -2   6   6  523.46   18.70
  -2   6   6  553.12   23.71
  -3  -8   5  677.78   25.27
   3   8  -5  651.73   21.51
   3   8  -5  792.84   36.94
  -3  -8  -6   49.26   22.41
   3   8   6   51.33   12.03
  -3  -8  -6   55.58   18.08
   1  -4  12  104.03   10.38
  -1   4 -12  114.97   14.69
  -1   4 -12   92.56   10.55
   1  -4  12  101.50   11.55
  -1   5 -11  153.54   13.66
  -1   5 -11  147.43   14.97
   1  -5  11  155.84   15.28
   1  -5  11  142.67    9.73
  -5  -7  -5   91.17   10.80
   5   7   5  104.49    8.34
   5   7   5   77.20    8.23
  -5   2   4   49.89   19.50
  -5   2   4   53.47   20.08
   5  -2  -4   44.67    2.91
   5  -2  -4   61.76   12.65
   4  -5  -1   41.03   16.08
  -4   5   1   46.96   19.68
  -4   5   1   49.64   19.34
   4  -5  -1   63.96   17.34
  -1   6   8 2212.59   29.55
   1  -6  -8 2213.44   28.91
  -1   6   8 2446.43   40.14
   1  -6  -8 2334.63   35.03
  -6   1  -2 2178.66   37.44
   6  -1   2 2494.26   44.96
  -6   1  -2 2129.80   22.64
  -2   5   8  160.09   12.94
   2  -5  -8  164.68   12.69
  -2   5   8  159.10   12.30
   2  -5  -8  167.86   19.26
   5  -2   8   36.83   10.90
   5  -2   8   38.54   18.28
  -5   2  -8   39.18   11.31
   6  -1   3  353.40   19.75
  -6   1  -3  297.87   27.24
   6  -1   3  315.60   14.81
  -2   7   3  638.66   26.30
   2  -7  -3  702.57   26.94
  -2   7   3  688.96   40.17
   2  -7  -3  644.61   21.89
  -6   0  -6 1764.73   32.21
   2   0 -12 1643.29   32.68
  -2   0  12 2035.49   30.15
   2   0 -12 1949.40   35.96
  -2   0  12 2071.10   34.17
   4   8  -3    0.88    4.19
  -4  -8   3    1.48    1.46
  -4  -8   3    1.67    1.32
  -4  -8   3    2.41    8.41
   4   8  -3    4.97    4.60
  -3  -6 -10  640.99   16.88
   3   6  10  684.58   26.10
  -3  -6 -10  746.99   26.42
   3   6  10  617.96   16.34
   3   6  10  685.97   23.79
  -6  -1  -7  185.59   14.74
   6   1   7  178.28   13.61
  -1  -4  12  199.64   29.48
   1   4 -12  166.17   27.94
  -1  -4  12  177.46    5.55
   1   4 -12  134.71   12.74
  -1  -4  12  191.71   11.19
   1   6  10  692.86   22.06
   1   6  10  671.32   19.16
   1   6  10  724.28   36.72
  -1  -6 -10  681.35   25.18
   1   6  10  750.27   25.78
   5   2  -7    8.35    7.60
   5   2  -7   11.97    9.78
  -5  -2   7   12.99   12.43
   5  -3   6   -2.17    8.61
  -5   3  -6   -1.89    8.52
  -5   3  -6    1.79    1.72
   5  -3   6    4.34    7.15
   5  -3   6    0.98    1.59
  -1  -9   0  201.93   11.89
   1   9   0  198.36   12.28
   1   9   0  234.77   13.80
  -1  -9   0  192.02    8.26
   1   8   6  104.37   15.01
   1   8   6   83.78    5.19
  -1  -8  -6   93.67   22.27
  -1  -8  -6   81.29   13.79
   1   8   6   88.92    9.29
  -6   1  -1  268.49    7.46
   6  -1   1  300.18    7.82
   6  -1   1  328.74   22.99
   6  -1   1  303.20   18.44
  -6   1  -1  278.35   16.34
  -4  -1 -12  350.14   18.00
  -4  -1 -12  346.17   18.85
   4   1  12  282.38   12.61
   4   1  12  339.26   19.08
   2   9   2    4.31    3.21
   2   9   2    4.77    9.71
  -2  -9  -2   12.33    9.61
  -2  -9  -2    6.00    4.99
  -2  -9  -2    4.94    3.27
  -4   4  -8  342.70   14.27
  -4   4  -8  349.53   42.41
   4  -4   8  348.28   13.89
   4  -4   8  355.09   19.94
   4  -4   8  346.95   19.02
  -1  -9   1   13.39    5.77
   1   9  -1   16.50   11.45
   1   9  -1   16.56    5.95
  -1  -9   1   26.26   12.07
   1  -8  -2   94.15   15.61
   1  -8  -2  113.57   13.74
  -1   8   2  108.37   17.89
  -1   8   2  111.73   21.02
   4  -5   5 1168.00   36.87
  -4   5  -5 1128.75   31.30
   4  -5   5 1069.03   33.33
  -4   5  -5 1030.61   37.92
  -5   3   2  847.95   26.61
  -5   3   2  840.16   28.96
   5  -3  -2  904.54   25.62
  -5   3   2  880.70   24.04
   5  -3  -2  979.98   31.53
   3  -6   6   95.56   10.10
  -3   6  -6  102.74   11.34
   3  -6   6   99.98   18.42
  -3   6  -6  102.92   11.20
   3   1  13    8.78    5.60
  -3  -1 -13    5.30    7.59
   3   1  13    7.98    8.92
  -3  -1 -13    5.54    8.32
  -1  -1  13  123.56   18.24
   1   1 -13  117.72   11.81
   1   1 -13  100.02    9.07
  -1  -1  13  120.15   10.88
  -2  -9   2  729.03   20.85
   2   9  -2  683.63   20.81
  -2  -9   2  700.34   26.16
   2   9  -2  634.48   18.97
   2   9  -2  696.54   26.87
   1  -8   4   68.26   10.70
  -1   8  -4   59.58   25.85
   1  -8   4   65.43   30.68
  -1   8  -4   67.82   11.38
  -5  -3   7  171.89    3.27
  -5  -3   7  191.95    4.03
  -5  -3   7  207.55   16.72
   5   3  -7  204.52    8.16
   5   3  -7  160.75   10.07
  -5   0 -10   21.80   12.30
   5   0  10    2.56    7.80
  -5   0 -10   17.28    7.83
   0   8  -6   14.72    9.95
   0   8  -6    9.39    2.93
   0  -8   6   12.68    8.72
   0  -8   6    9.71    6.50
   0   8  -6   15.71    7.43
   6   4  -3  302.40   22.06
  -6  -4   3  402.69   18.72
   6   4  -3  432.96   19.93
  -6  -4   3  367.35   15.80
  -6  -4   3  353.27   14.56
   3   2 -11 1411.87   26.12
  -3  -2  11 1582.16   32.14
  -3  -2  11 1549.61   20.54
   3   2 -11 1325.45   20.95
   3  -6  -3  397.12   17.15
   3  -6  -3  451.37   28.71
  -3   6   3  415.90   32.42
  -3   6   3  377.66   36.84
   4   2  12   77.72   29.10
  -4  -2 -12   91.94   15.69
  -4  -2 -12   80.99    8.85
   4   2  12   71.05    5.92
  -1   7   6  639.58   24.08
  -1   7   6  592.93   20.17
   1  -7  -6  569.49   19.98
   1  -7  -6  596.21   23.53
   3   4  12    0.77    2.57
  -3  -4 -12    8.86    8.68
  -3  -4 -12    9.17    4.98
   3   4  12   -0.09    9.48
   0  -2 -13  657.93   23.98
   0  -2 -13  543.47   21.28
   0   2  13  609.41   38.97
   0   2  13  649.86   21.61
   2  -2  13  406.04   17.65
   2  -2  13  428.78   22.95
  -2   2 -13  429.45   38.25
  -2   2 -13  401.86   21.49
   3   1 -11  771.15   25.01
  -3  -1  11  886.77   24.84
   3   1 -11  826.48   26.89
  -3  -1  11  874.68   28.81
   3   1 -11  737.43   20.11
   1   9   1    5.53   14.30
  -1  -9  -1   14.21   11.39
   1   9   1    7.04    5.64
  -1  -9  -1    9.79    7.49
   6  -1   4   37.34   13.34
   6  -1   4   44.16   24.39
  -6   1  -4   42.23   11.31
  -5  -5   6  193.20   15.91
   5   5  -6  187.67   14.34
   5   5  -6  141.37   10.83
  -5  -5   6  183.46    8.25
   4   8   5  216.64   12.75
  -4  -8  -5  177.42   14.67
  -4  -8  -5  162.49   11.74
   6   1  -3   41.69   18.73
  -6  -1   3   34.44   12.36
  -6  -1   3   31.31    8.26
  -6  -1   3   32.23    3.88
  -6  -1   3   36.24    1.78
   6   5  -2 1728.74   24.76
   6   5  -2 2328.27   41.34
  -6  -5   2 1867.38   28.74
  -6  -5   2 2260.09   30.85
  -4   0   9  694.95   26.38
   4   0  -9  638.89   22.74
   4   0  -9  627.98   29.90
  -1   0  13 1283.45   20.79
  -1   0  13 1239.20   24.78
   1   0 -13  995.66   19.06
   1   0 -13 1248.54   40.80
   3   0  13   49.59    6.82
  -3   0 -13   63.11   13.07
   3   0  13   53.29   11.24
  -3   0 -13   58.30   27.80
  -6  -6  -2  993.39   13.98
   6   6   2 1172.01   19.15
   6   6   2  889.34   22.28
  -6  -6  -2 1152.92   22.06
  -6   0   2   58.34    9.55
   6   0  -2   72.58   11.74
  -6   0   2   58.89    7.50
  -6   0   2   56.68   12.54
   6   0  -2   58.17    3.99
  -3  -9   0 1932.60   26.57
  -3  -9   0 2100.31   33.39
   3   9   0 2617.75   37.56
   3   9   0 1946.85   22.99
  -6  -6  -1  566.37   20.50
   6   6   1  757.57   26.83
  -6  -6  -1  737.14   23.74
  -6  -6  -1  598.29   20.81
  -1  -9   2   46.60   23.03
  -1  -9   2   40.61   10.96
   1   9  -2   33.06    6.32
   1   9  -2   39.00   11.25
  -3  -9  -1 1056.13   25.30
   3   9   1 1358.88   26.32
   3   9   1  992.49   13.68
  -3  -9  -1 1169.18   14.43
  -3  -9  -1 1049.55   17.01
   5   7  -3  101.15    7.58
   5   7  -3  135.53   29.55
  -5  -7   3  125.55    4.58
  -5  -7   3  124.36   28.55
  -5  -7   3  131.30    6.68
   0  -8  -5    4.04    9.39
   0  -8  -5    2.87    5.11
   0   8   5    0.12    3.81
   0   8   5    2.32    8.83
   5   5   9 1329.10   17.62
   5   5   9 1798.58   24.57
   5   5   9 1588.61   27.09
  -5  -5  -9 1824.67   30.94
  -5  -5  -9 1843.02   20.84
  -6  -4  -7   22.39   11.78
   6   4   7   17.76    7.29
  -6  -4  -7    9.77    3.72
  -6  -4  -7   21.57    6.40
   6   4   7   18.52   11.02
   5   1  -7   41.89   19.09
  -5  -1   7   50.63   24.61
   5   1  -7   36.25   21.50
  -5  -6   5  819.65   22.42
  -5  -6   5  918.86   38.96
  -5  -6   5  851.12   24.82
   5   6  -5  699.38   23.98
  -5  -6   5  906.40   26.14
   4   4  -9  173.45   11.69
   4   4  -9  208.70    9.08
   4   4  -9  147.56    5.41
  -4  -4   9  211.60   14.02
  -4  -4   9  191.51   11.75
  -2  -3 -13 1622.21   23.96
  -2  -3 -13 1496.29   26.43
   2   3  13 1541.40   27.82
   2   3  13 1398.95   24.39
  -2   7  -6  311.68   17.82
   2  -7   6  313.70   19.28
   2  -7   6  334.30   15.49
  -2   7  -6  317.58   17.78
  -6   1   0   68.51   11.94
  -6   1   0   65.63    7.07
   6  -1   0   72.02   11.63
   6  -1   0   79.18   32.38
   0   3 -13  787.61   27.40
   0   3 -13  635.56   19.80
   0  -3  13  754.24   26.09
   0  -3  13  786.49   32.55
  -6  -6  -3  651.75   23.06
  -6  -6  -3  593.55   19.89
   6   6   3  518.59   20.14
   6   6   3  674.60   26.99
  -4   0 -12  581.02   17.41
   4   0  12  486.55   11.06
   4   0  12  546.18   26.98
  -4   0 -12  562.77   17.28
   4   0  12  536.67   20.84
  -2  -3  12   29.57   16.39
  -2  -3  12   36.22   16.66
   2   3 -12   34.30   14.61
   2   3 -12   23.70   11.76
  -3  -2 -13  958.19   31.87
  -3  -2 -13  994.53   37.69
   3   2  13  827.80   25.59
   3   2  13  965.38   36.39
  -1  -2  13  115.50   20.94
   1   2 -13  104.88   11.56
   1   2 -13   82.94    8.40
  -1  -2  13  111.90   27.00
  -3   5   6  276.23   23.93
   3  -5  -6  250.11    9.63
   3  -5  -6  273.25   19.96
  -3   5   6  266.58   17.84
   4   7  -6   28.79    7.79
  -4  -7   6   37.05   11.88
  -4  -7   6   37.83   10.56
  -3  -9   1 1075.65   23.90
   3   9  -1 1053.76   16.53
  -3  -9   1  984.94   14.70
   3   9  -1 1332.22   26.78
   3   9  -1 1138.98   15.01
   1  -7   8   13.98    7.69
  -1   7  -8   18.72    7.54
   1  -7   8   21.11   10.83
  -1   7  -8   13.71   11.54
  -1  -3 -13   69.00   10.70
   1   3  13   65.45   14.74
   1   3  13   75.72   10.48
  -1  -3 -13   74.67   13.04
   1  -3  13  151.26   10.31
  -1   3 -13  144.92    9.12
   1  -3  13  153.16   12.62
  -1   3 -13  153.19   11.87
   6   5   6  137.42   13.75
   6   5   6  158.55   12.39
  -6  -5  -6  153.92    6.03
  -6  -5  -6  144.86   13.86
  -3  -9  -2   64.25    8.19
  -3  -9  -2   66.21    6.14
  -3  -9  -2   67.28   10.60
   3   9   2   55.15    9.98
   3   9   2   74.57   33.02
   2   7   9   11.82    6.41
   2   7   9   14.94   12.65
  -2  -7  -9   11.21    8.46
   2   7   9    8.17    2.72
   2   7   9   10.64    3.94
   4  -5  -2   13.33    7.47
   4  -5  -2   17.49   11.56
  -4   5   2    7.88   10.76
  -4   5   2   13.22   10.41
   3   6  -9  556.43   33.39
  -3  -6   9  586.60   16.60
  -3  -6   9  581.72   20.38
  -6  -6   0    9.48    7.03
  -6  -6   0   18.99    8.45
  -6  -6   0   10.41    7.16
  -1  -9  -2  237.79   12.90
   1   9   2  252.10    8.47
   1   9   2  284.62   30.09
  -1  -9  -2  232.68   23.70
  -2  -9  -3    5.04    2.19
   2   9   3    2.56    3.22
  -2  -9  -3    8.39    8.73
   2   9   3   12.09   12.87
  -2  -9  -3    4.53    9.37
  -1   6 -10  321.87   35.76
   1  -6  10  306.63   16.20
   1  -6  10  315.13   18.96
  -1   6 -10  299.84    9.88
   1  -4 -11  121.27   11.93
  -1   4  11  142.38   23.18
  -1   4  11  128.92    8.77
   1  -4 -11  130.17    9.51
   1   7  -9  564.24   34.21
  -1  -7   9  536.55   43.68
   1   7  -9  591.07   32.74
   3  -5   9    6.41    5.04
  -3   5  -9    3.69    3.86
   3  -5   9    0.11    8.41
  -3   5  -9    2.11    9.06
  -3   3   9 1265.81   38.28
   3  -3  -9 1023.73   25.13
   3  -3  -9 1199.85   41.40
   3  -3  -9 1094.12   31.39
   3  -3  -9 1152.68   27.51
   3   3 -11 2093.24   52.17
   3   3 -11 2059.99   52.55
  -3  -3  11 2271.42   58.48
  -3  -3  11 2230.40   53.77
   4  -2  11  898.84   27.04
  -4   2 -11  982.08   34.37
   4  -2  11  918.06   27.41
   4  -2  11  955.44   36.16
  -4   2 -11  927.10   32.46
   2   9  -3  274.05    7.45
  -2  -9   3  325.14   15.79
   2   9  -3  282.46   10.13
   2   9  -3  339.99   33.76
  -2  -9   3  284.77   20.70
  -6   1  -5  935.26   33.83
   6  -1   5 1094.36   22.76
   6  -1   5  983.44   17.12
  -5  -4 -10  465.01   36.29
  -5  -4 -10  459.35   22.46
   5   4  10  410.59   24.16
   5   4  10  463.60   22.58
   2   6 -10  159.38   11.22
  -2  -6  10  155.32   32.09
  -2  -6  10  158.05   33.74
   4  -3  10 1362.69   32.65
   4  -3  10 1418.54   40.99
   4  -3  10 1396.82   33.82
  -4   3 -10 1423.34   40.07
  -4   3 -10 1417.93   39.21
   4   7   8  425.91   24.91
  -4  -7  -8  426.22   40.53
   4   7   8  395.07   26.19
   3   5 -10 2084.75   53.43
   3   5 -10 2221.39   50.72
  -3  -5  10 2340.24   60.34
  -3  -5  10 2228.88   53.75
   5   7   6   45.95   18.60
   5   7   6   47.62   18.71
  -5  -7  -6   46.54   12.81
   3   0 -11   33.48   16.02
   3   0 -11   26.46   10.94
  -3   0  11   33.13   10.50
   3   0 -11   23.03    4.95
  -3   0  11   25.26    6.21
   5   6   8  175.16   14.86
   5   6   8  216.40   15.25
  -5  -6  -8  204.62    3.65
  -5  -6  -8  171.96    2.97
  -5  -6  -8  200.37   13.85
  -5  -4   7    0.96    1.79
  -5  -4   7   -1.43    8.80
   5   4  -7    2.14    7.33
   5   4  -7    1.00    3.16
  -5  -4   7   -0.93    2.51
  -2  -8  -7  372.47   22.42
  -2  -8  -7  385.61   24.12
   2   8   7  406.84   25.84
   4  -4  -5    0.92    1.49
   4  -4  -5    2.08    2.82
  -4   4   5    0.63    7.71
   4  -4  -5   -3.50    9.11
  -4   4   5    0.63    7.30
   1   8  -7   -4.06   10.12
  -1  -8   7    2.14    7.66
   1   8  -7    5.79    4.95
  -2  -5  11   10.36    6.80
   2   5 -11   15.71    8.83
  -2  -5  11    9.35    7.34
   2   5 -11   13.00    3.65
   2   5 -11    9.33    3.16
  -6  -2  -8  199.42   12.47
  -6  -2  -8  209.00   11.59
   6   2   8  190.92   14.30
  -1  -9   3   34.38   10.81
   1   9  -3   30.13   10.32
   1   9  -3   32.04   14.89
   1   9  -3   19.51    6.16
  -1  -9   3   29.63    8.71
   4   3  12  395.26   20.00
   4   3  12  445.47   31.22
  -4  -3 -12  479.40   24.72
  -4  -3 -12  477.13   26.71
  -6  -6  -4   85.99    8.46
  -6  -6  -4  106.80   11.42
   6   6   4   92.22    7.16
   6   6   4   79.38   11.25
   1  -8  -3   34.55   11.13
   1  -8  -3   38.93   12.35
  -1   8   3   34.67   17.39
  -1   8   3   51.73   19.63
   2  -6   9 1170.58   32.26
   2  -6   9 1177.65   34.59
  -2   6  -9 1239.73   44.21
  -2   6  -9 1195.80   36.14
  -2   1  12 2254.68   60.42
   2  -1 -12 2339.54   59.17
  -2   1  12 2365.29   55.41
   2  -1 -12 2113.19   59.37
   6   3  -4  278.52   11.54
   6   3  -4  200.09   12.11
  -6  -3   4  256.94   12.94
  -6  -3   4  234.78    6.84
  -6  -3   4  251.07    4.97
   3  -2 -10  779.85   23.57
   3  -2 -10  787.32   29.75
   3  -2 -10  850.55   24.53
   3  -2 -10  845.94   21.94
  -3   2  10  894.77   32.25
   4  -5   6  607.80   17.51
   4  -5   6  584.58   24.52
  -4   5  -6  570.60   23.19
  -4   5  -6  616.67   20.72
   0   7  -9 1027.93   49.86
   0   7  -9 1035.28   35.23
   0   7  -9  990.97   28.94
   0   7  -9  964.45   27.98
   0  -7   9 1012.69   43.83
  -6  -2   4  526.98   22.30
   6   2  -4  696.55   25.82
  -6  -2   4  645.16   27.69
  -6   0  -7  636.22   26.59
   6   0   7  706.60   42.31
   6   0   7  610.73   23.15
  -1   8  -5   20.15   11.93
  -1   8  -5   15.16   10.50
   1  -8   5   17.49    7.68
   1  -8   5   21.84   10.62
   0   5  11  943.87   34.55
   0   5  11  903.95   33.72
   0  -5 -11  848.84   26.24
   0  -5 -11  922.25   24.92
   1  -5 -10 1444.94   38.21
   1  -5 -10 1484.19   41.08
  -1   5  10 1355.74   38.82
   4   8  -4  478.73   32.45
   4   8  -4  398.55   22.59
  -4  -8   4  448.39   25.29
   3   9  -2  320.55   17.32
  -3  -9   2  380.59   23.89
   3   9  -2  428.76   26.97
  -3  -9   2  362.63   17.66
   3   9  -2  372.97   18.64
  -5   1   6  564.82   30.86
  -5   1   6  533.45   23.51
   5  -1  -6  610.51   23.58
   0  -4 -12  177.17   14.42
   0   4  12  189.76   26.78
   0  -4 -12  193.95    9.72
   0   4  12  197.44   27.38
   6   3   8   68.92   11.74
  -6  -3  -8   73.12   11.19
  -6  -3  -8   78.91    7.76
   1  -1 -13 1205.38   36.40
  -1   1  13 1228.75   35.45
  -1   1  13 1251.30   35.40
   1  -1 -13 1042.10   29.81
   3   7   9    3.22    5.73
  -3  -7  -9   10.77   12.83
   3   7   9   16.50   10.55
  -3   1 -13  323.77   21.49
   3  -1  13  326.85   22.31
  -3   1 -13  344.93   22.16
   3  -1  13  318.38   19.38
   0   7   8  132.25    7.65
   0  -7  -8  147.36   10.60
   0   7   8  160.74   17.70
   0  -7  -8  150.53   12.55
   2  -7  -4 1475.42   38.32
  -2   7   4 1669.30   48.12
   2  -7  -4 1602.41   43.87
  -2   7   4 1547.23   40.08
  -5   3  -7   33.60   11.40
   5  -3   7   26.08    8.83
   5  -3   7   13.44    4.64
   5  -3   7   29.36    9.47
   5  -3   7   25.52    9.49
   3   9   3  754.64   28.61
  -3  -9  -3  628.97   25.33
  -3  -9  -3  584.28   21.80
  -6   1   1   61.58    8.73
  -6   1   1   60.38    7.03
   6  -1  -1   84.65   17.18
  -6   1   1   69.33   27.84
   6  -1  -1   73.30    7.14
   1  -3 -12   90.77   12.40
   1  -3 -12   82.53   12.53
  -1   3  12   82.92   11.95
  -1   3  12   74.55    9.92
  -1   0 -14  202.84   11.73
   1   0  14  213.78   13.13
  -1   0 -14  233.29   16.29
   1   0  14  218.85   21.25
  -5   3   3 1237.91   43.92
   5  -3  -3 1360.30   32.55
  -5   3   3 1301.32   35.06
   5  -3  -3 1499.56   46.35
   6   6  -1  363.22   19.67
  -6  -6   1  446.97   26.28
  -6  -6   1  439.59   28.21
  -6  -6   1  377.29   20.38
   3  -4  -8   28.41    9.18
  -3   4   8   35.92   12.96
  -3   4   8   34.20   11.15
   3  -4  -8   33.16   15.49
   3  -4  -8   31.52    6.11
   4  -2  -8   98.50   13.14
  -4   2   8  119.16   24.72
   3   8  -6   12.97    7.96
  -3  -8   6   16.28   12.16
   3   8  -6   10.86    7.21
  -3  -8  -7  531.10   22.23
  -3  -8  -7  539.93   22.70
   3   8   7  592.26   24.14
   6   1   8  560.92   22.25
  -6  -1  -8  608.30   23.91
  -6  -1  -8  592.27   23.99
   5  -4   2   84.95   13.03
  -5   4  -2   74.26   15.99
   5  -4   2   68.58   12.69
  -5   4  -2   71.13   15.44
   3  -6   7  275.55   16.23
  -3   6  -7  289.17   16.10
  -3   6  -7  302.71   11.67
   3  -6   7  280.23   12.60
  -6  -5   3 1085.58   28.65
   6   5  -3 1206.89   35.71
   6   5  -3  871.88   25.65
  -6  -5   3 1186.76   33.19
   2   8  -7  445.15   47.95
  -2  -8   7  410.38   23.97
   2   8  -7  426.15   24.23
   1   9   3  134.02   15.89
  -1  -9  -3  119.68   18.68
  -1  -9  -3  140.78   24.96
   1   9   3  122.10   11.44
   5   8   1  168.48    7.59
  -5  -8  -1  178.10    6.82
   5   8   1  219.56   15.39
  -5  -8  -1  186.64   10.64
  -5  -8  -1  172.48   27.28
  -3  -7   8  540.40   32.16
  -3  -7   8  510.25   27.49
   3   7  -8  471.26   25.84
   4   8   6   81.90   12.99
  -4  -8  -6   91.16   17.90
   4   8   6   90.11   16.66
  -1  -7  -9   27.78    8.67
  -1  -7  -9   30.56    8.35
   1   7   9   53.75   18.23
   1   7   9   42.19    3.88
   1   7   9   40.64   12.30
   5  -4   3   34.92   12.63
  -5   4  -3   38.60   14.00
  -5   4  -3   47.90   14.03
   5  -4   3   40.52   11.73
   2  -4  12   80.25    8.06
   2  -4  12   92.03   23.63
  -2   4 -12   87.57   14.51
  -2   4 -12   97.13   15.58
  -5   2   5  486.42   21.33
  -5   2   5  495.67   20.89
   5  -2  -5  560.31   30.56
   3  -6  -4  386.81   24.37
   3  -6  -4  359.86   20.47
  -3   6   4  388.93   24.11
  -3   6   4  342.56   35.16
  -5  -8  -2  978.35   24.47
  -5  -8  -2  910.90   28.54
  -5  -8  -2 1079.38   28.42
   5   8   2 1203.57   36.82
  -5  -2 -11  589.53   22.54
   5   2  11  549.92   22.50
  -5  -2 -11  586.36   25.18
   5   2  11  530.55   25.12
   6   0  -3  101.69   23.06
  -6   0   3   80.28   30.02
  -6   0   3   84.18   11.26
  -5   4  -1  478.03   24.72
  -5   4  -1  448.37   25.68
   5  -4   1  537.25   30.38
   5  -4   1  475.37   23.85
  -5   1 -10  319.54   22.33
   5  -1  10  324.47   21.08
  -5   1 -10  309.90   17.17
   1  -1  14  638.61   24.83
  -1   1 -14  662.22   27.53
  -1   1 -14  614.17   28.89
   1  -1  14  668.28   34.52
  -5   0   7    2.36    6.10
   5   0  -7   -1.64    8.26
   5   0  -7    2.70    5.14
  -6  -4   4  629.91   23.33
  -6  -4   4  583.78   18.51
  -6  -4   4  557.98   17.44
   6   4  -4  460.37   26.89
   6   4  -4  630.74   21.37
   3   3  13  642.48   23.39
  -3  -3 -13  770.34   28.62
  -3  -3 -13  728.63   28.08
   3   3  13  716.69   26.44
   1   3 -13  159.23    8.30
   1   3 -13  232.75   26.46
  -1  -3  13  237.87   12.05
  -1  -3  13  222.08   33.37
   1   1  14   19.81   10.40
  -1  -1 -14   25.46   10.74
   1   1  14   19.61   11.43
  -1  -1 -14   20.07    9.01
   2   9   4   40.13   13.46
   2   9   4   27.91    9.62
  -2  -9  -4   37.06   17.12
   2   9   4   20.71    5.96
  -2  -9  -4   31.78    9.34
  -5   2  -9  237.67   14.02
   5  -2   9  235.26   17.01
   5  -2   9  234.66   14.80
   4  -1  12  313.48   16.25
   4  -1  12  352.18   23.82
  -4   1 -12  314.67   21.91
  -4   1 -12  350.76   22.52
  -5  -8   0  645.81   21.36
  -5  -8   0  589.74   24.17
   5   8   0  742.05   28.04
   5   8   0  557.12   19.34
  -4   3   7   87.89   17.45
  -4   3   7  106.51   36.02
   4  -3  -7   93.78    4.87
   4  -3  -7  109.88   13.39
   4  -3  -7   91.10    2.74
   2  -4 -10   93.59   15.18
  -2   4  10   86.92   33.20
   2  -4 -10   99.64    6.35
   2  -4 -10   96.70   11.66
  -2  -7   9  401.81   34.25
   2   7  -9  400.07   26.96
  -2  -7   9  396.37   23.08
   0  -9   1  173.23    9.70
   0  -9   1  151.01   11.37
   0   9  -1  197.37   15.99
   0   9  -1  154.19   17.79
   5   7  -4  240.40   19.84
  -5  -7   4  324.13   19.81
  -5  -7   4  336.60   17.16
   6  -1   6 1284.52   36.10
  -6   1  -6 1192.49   35.34
   6  -1   6 1149.73   31.13
   4   5  11   19.52    6.34
  -4  -5 -11    8.33   14.24
   4   5  11    8.74    4.36
   4   5  11    7.94    9.57
  -4  -5 -11   10.52    5.94
   5   1  11  782.18   37.20
  -5  -1 -11  786.64   27.86
  -5  -1 -11  775.89   28.18
   5   1  11  710.05   20.90
  -6  -6  -5  303.24   20.53
  -6  -6  -5  276.09    6.95
   6   6   5  316.42   11.42
   6   6   5  250.82   17.46
   0   8  -7  989.00   50.40
   0  -8   7  995.77   29.29
   0   8  -7 1038.14   36.50
   0  -8   7  964.44   34.78
   0   9   0  376.17   19.76
   0  -9   0  368.05   21.99
   0   9   0  417.86   41.89
   0  -9   0  388.31   21.00
   2   9  -4  666.10   23.15
  -2  -9   4  694.27   20.14
   2   9  -4  746.94   30.39
  -2  -9   4  683.19   27.31
  -6  -1   4  342.04   20.52
  -6  -1   4  437.34   23.78
   6   1  -4  468.82   25.73
   2  -6  -7  247.06    8.48
  -2   6   7  294.04   38.34
   2  -6  -7  281.54   35.62
  -2   6   7  271.61   18.97
  -2   3  11   56.82   14.22
   2  -3 -11   59.47   23.72
   2  -3 -11   57.07   24.68
  -2   3  11   52.20   12.99
   3  -3  12  115.43   15.61
   3  -3  12  108.37   13.68
  -3   3 -12  116.27   23.60
  -3   3 -12  118.00   32.81
   1   8   7 1281.38   40.48
   1   8   7 1169.66   28.53
  -1  -8  -7 1182.82   34.35
  -1  -8  -7 1225.39   35.88
  -1  -9   4   12.85    8.89
  -1  -9   4   17.98   11.84
   1   9  -4   18.41   10.59
   1   9  -4   23.68   11.37
  -2   0 -14   15.07   10.22
   2   0  14   13.47   12.35
  -2   0 -14    9.36   12.17
   2   0  14   11.49    6.02
   4  -1  -9  172.53   11.90
  -4   1   9  191.07   13.95
   4  -1  -9  189.01   14.03
  -2  -5 -12  136.42    6.24
   2   5  12  138.35   11.59
   2   5  12  142.74   14.24
  -2  -5 -12  134.82   33.93
  -4  -6 -10 1157.25   26.20
   4   6  10 1161.08   26.28
   4   6  10 1290.53   37.13
   4   6  10 1313.16   35.70
  -4  -6 -10 1422.82   39.70
  -4   5   3 1818.63   48.60
   4  -5  -3 2209.93   77.90
   4  -5  -3 1961.61   47.03
  -4   5   3 2042.58   52.71
   3  -4  11  254.24   23.37
  -3   4 -11  241.32   31.33
  -3   4 -11  239.33   11.68
   3  -4  11  243.02    9.17
   4  -4   9 2548.36   60.78
  -4   4  -9 2522.59   67.53
   4  -4   9 2507.88   72.29
   4  -4   9 2607.23   72.52
   0  -5  12  318.70   35.19
   0   5 -12  288.90   33.90
   0  -5  12  301.62   14.22
   0   5 -12  271.99    8.15
  -5  -8  -3 1474.25   39.57
  -5  -8  -3 1304.20   38.33
   5   8   3 1685.96   43.92
  -5  -8  -3 1446.40   33.21
   5  -4   4   46.57   16.26
  -5   4  -4   34.16    6.82
  -5   4  -4   34.23   13.10
   5  -4   4   33.56   11.01
  -4  -6   8   72.49   25.55
  -4  -6   8   56.84    7.90
   4   6  -8   53.33   24.24
   0   6  10  655.53   22.04
   0  -6 -10  668.49   32.23
   0   6  10  682.26   29.17
  -2  -1 -14   10.57    7.97
   2   1  14    8.55    7.02
  -2  -1 -14    9.35    8.36
   2   1  14   10.19   14.74
  -2   5 -11 1937.55   52.57
  -2   5 -11 1810.57   45.74
   2  -5  11 1832.47   46.01
   2  -5  11 1886.48   49.72
  -2   7  -7 1036.52   21.65
   2  -7   7 1002.94   36.08
   2  -7   7 1060.81   20.12
  -2   7  -7 1046.81   35.45
   3   9  -3 1060.21   37.29
  -3  -9   3  883.15   31.61
  -3  -9   3  921.93   26.41
   3   9  -3  805.13   27.51
   0   9  -2  359.54   19.86
   0   9  -2  402.72   24.77
   0  -9   2  349.41   20.94
   0  -9   2  378.81   20.01
   6   5   7   83.36   13.32
  -6  -5  -7  101.91   34.62
  -6  -5  -7   94.71    6.06
   6   5   7   97.00    8.86
   6   4   8    4.81    8.07
  -6  -4  -8   -4.14    8.99
   6   4   8    2.15    2.45
  -6  -4  -8   -0.29    4.07
  -4  -2  10  877.79   25.24
   4   2 -10  793.98   28.92
   4   2 -10  897.95   28.37
  -4  -2  10  935.13   35.53
   2   4 -12    7.88   10.31
   2   4 -12    2.96    3.76
  -2  -4  12    5.68    4.60
  -2  -4  12    3.03    6.23
   3   4 -11 1855.41   49.72
   3   4 -11 1949.60   46.49
  -3  -4  11 2016.84   49.87
  -3  -4  11 2048.29   70.62
   5  -4   0  624.55   46.86
   5  -4   0  509.18   30.23
  -5   4   0  473.06   29.26
  -5   4   0  505.03   25.92
   0   0  14    8.18    8.82
   0   0  14    8.88   12.28
   0   0 -14   10.86    7.28
   0   0 -14    6.17    4.55
   0   9   1 1291.17   33.21
   0  -9  -1 1261.21   34.75
   0   9   1 1457.28   41.48
   0  -9  -1 1220.63   41.75
  -3  -9  -4 1697.35   44.25
  -3  -9  -4 1808.86   54.45
   3   9   4 2206.83   56.63
   0   1 -14   94.90    8.04
   0   1 -14  116.10   22.35
   0  -1  14  109.43   20.79
   0  -1  14  123.01   24.19
   0  -8  -6   55.91   26.13
   0   8   6   65.90   24.95
   0   8   6   48.85    7.28
   0  -8  -6   66.27   35.12
   0  -3 -13 1470.56   38.58
   0   3  13 1482.69   38.83
   0   3  13 1451.27   40.49
   0  -3 -13 1297.47   38.31
   2   6  11 1000.79   30.44
  -2  -6 -11  923.27   23.12
   2   6  11  930.42   40.77
  -2  -6 -11  939.79   31.21
   5   3  11  816.40   34.88
  -5  -3 -11  918.43   28.91
   5   3  11  833.42   25.61
  -5  -3 -11  803.57   28.87
  -2   3 -13  640.26   29.31
   2  -3  13  671.88   34.20
   2  -3  13  661.68   23.42
  -2   3 -13  682.91   41.22
   5   8  -1  398.09   19.93
   5   8  -1  586.95   32.62
  -5  -8   1  436.10   25.32
  -5  -8   1  482.14   23.73
  -4  -5   9  252.66   13.72
  -4  -5   9  244.68   12.30
   4   5  -9  219.83   12.95
   4   5  -9  247.81   10.25
  -1   7   7 1555.14   43.19
  -1   7   7 1418.53   36.84
   1  -7  -7 1446.71   40.31
   1  -7  -7 1385.35   37.15
  -6  -6   2  394.68   20.41
  -6  -6   2  353.46   18.93
   6   6  -2  304.05   20.29
  -6  -6   2  391.71   23.04
  -1   8   4 1009.41   28.00
   1  -8  -4  994.36   30.56
   1  -8  -4  977.37   28.86
  -1   8   4 1139.06   37.02
   0   6 -11  154.32   12.64
   0   6 -11  160.85   25.02
   0  -6  11  176.76   25.15
   0  -6  11  169.30   34.59
   3  -1 -11    6.06    9.43
   3  -1 -11    4.29    6.64
  -3   1  11    4.07    9.89
  -3   1  11    6.35    3.88
   6  -1  -2   83.68    9.02
  -6   1   2   83.11   26.52
  -6   1   2   78.22    8.46
   6  -1  -2  110.24   25.32
   5   7   7  234.42   10.53
   5   7   7  188.49   18.83
  -5  -7  -7  225.13   22.71
   4   1 -10   92.56   12.92
  -4  -1  10  101.05   16.20
   4   1 -10   97.74   12.92
  -1   8  -6   69.86   29.61
   1  -8   6   65.47   29.03
   1  -8   6   59.59   12.78
  -1   8  -6   81.99   28.72
   4  -5   7    4.82    6.14
  -4   5  -7    9.20    9.92
   4  -5   7    5.41    8.94
  -4   5  -7    9.51    5.57
   1  -6  -9  327.00   22.19
  -1   6   9  326.64   20.12
  -1   6   9  362.73   23.94
   1  -6  -9  325.20   20.97
   6  -2   2  903.48   31.97
  -6   2  -2  846.42   31.32
  -6   2  -2  862.57   27.56
   6  -2   2  878.42   28.94
  -1  -6  11   16.26   12.06
   1   6 -11    4.73    3.57
   1   6 -11    9.01    8.59
  -1  -6  11    7.87    8.66
  -5  -6   6 1210.97   39.37
  -5  -6   6 1128.69   29.26
   5   6  -6 1158.70   28.70
   5   6  -6  912.11   28.40
   4   3 -10  418.99   24.62
  -4  -3  10  497.26   28.65
  -4  -3  10  485.57   23.30
   4   3 -10  478.29   24.61
  -1  -5  12  309.70   15.42
   1   5 -12  331.44   23.49
  -1  -5  12  301.57   15.68
   1   5 -12  201.59    8.63
  -5  -5   7    2.45    2.83
  -5  -5   7    6.51    5.33
   5   5  -7    3.39    7.92
   5   5  -7    0.94    2.14
   3  -7   2    3.14    8.80
   3  -7   2   10.35   10.33
  -3   7  -2   -1.95    8.20
  -3   7  -2    0.16    6.03
   4   9   1    3.38    3.16
   4   9   1   11.60   22.13
  -4  -9  -1    2.19    3.38
  -4  -9  -1    9.71    8.70
  -6   2  -3   70.41    4.06
   6  -2   3   82.72   36.36
   6  -2   3   73.74   11.74
  -6   2  -3   85.10   30.80
  -2   1 -14    0.63    6.51
   2  -1  14    5.23    8.58
   2  -1  14    4.99    9.38
  -2   1 -14   10.25    7.22
  -3   7  -1  269.90   16.82
  -3   7  -1  296.15   28.69
   3  -7   1  297.67   14.52
   3  -7   1  254.10   13.30
   0   9  -3  753.16   30.99
   0   9  -3  835.88   47.65
   0  -9   3  759.73   29.65
   0  -9   3  751.85   24.37
   4   4  12  544.46   24.18
  -4  -4 -12  424.83   26.27
   4   4  12  483.82   24.97
  -4  -4 -12  556.83   26.76
   1   5  12  523.65   22.88
   1   5  12  553.21   22.61
  -1  -5 -12  532.37   19.00
  -1  -5 -12  488.77   41.56
   4   9   0   94.45    9.75
  -4  -9   0  116.88   18.08
  -4  -9   0  105.60    9.99
   4   9   0  123.15   11.21
  -5  -2   8   18.60   11.03
   5   2  -8   17.00    7.41
   5   2  -8   16.23   12.62
   2  -5  -9  384.12   24.30
   2  -5  -9  348.54   19.90
  -2   5   9  376.15   23.29
  -2   5   9  403.86   24.07
   5   0  11  501.81   27.56
  -5   0 -11  539.42   30.21
  -5   0 -11  541.92   31.22
   5   0  11  446.28   20.48
   2   4  13 2919.92   71.89
  -2  -4 -13 2848.46   34.43
   2   4  13 2755.99   76.96
  -2  -4 -13 2954.63   31.54
  -1  -9  -4  322.61   27.58
   1   9   4  344.30   22.59
   1   9   4  333.24   17.00
  -1  -9  -4  316.47   28.72
  -5  -8  -4   86.67   11.12
  -5  -8  -4  107.63   22.56
   5   8   4  105.94    9.51
   0  -4  13 1183.50   40.80
   0  -4  13 1177.38   36.92
   0   4 -13 1019.59   29.36
   0   4 -13 1231.53   36.32
   6   0   8    9.64    7.69
  -6   0  -8   12.28   12.84
   6   0   8   16.14   11.19
  -5   4  -5   12.82    6.70
   5  -4   5   14.03   13.10
   5  -4   5   13.63    9.61
  -5   4  -5   16.35   12.47
  -3  -5 -12    4.71    7.34
   3   5  12   -3.87    9.94
   3   5  12   -0.79    7.33
  -3  -5 -12    1.45    3.32
   1  -2  14  161.63   25.09
  -1   2 -14  144.19   11.12
  -1   2 -14  183.39   15.91
   1  -2  14  168.13   15.46
  -4  -8   5   32.70   17.69
   4   8  -5   22.59   10.87
   4   8  -5   34.56   16.97
  -6   2  -1  931.50   28.58
   6  -2   1  918.37   32.17
   6  -2   1 1087.66   54.08
  -6   2  -1  910.87   31.64
  -4  -9  -2  247.45   10.07
   4   9   2  255.28   12.16
  -4  -9  -2  259.10   13.70
   4   9   2  320.79   14.63
   5   3  -8    8.14   10.93
  -5  -3   8    1.11    1.41
   5   3  -8    2.94    2.66
  -5  -3   8    1.13    3.54
   4   7  -7   27.12   12.42
  -4  -7   7   32.23   17.78
  -4  -7   7   34.52    8.06
   5   5  10  597.82   24.86
  -5  -5 -10  631.05   24.31
  -5  -5 -10  653.59   20.33
   5   5  10  647.51   21.79
  -3  -6 -11   64.37   12.10
   3   6  11   62.36   31.24
   3   6  11   61.62   23.64
  -3  -6 -11   48.78    4.92
  -3   7  -3   46.29   10.68
   3  -7   3   49.26   13.71
   3  -7   3   48.45   23.77
  -3   7  -3   46.40   16.58
   1   2  14   12.40   10.59
   1   2  14   10.91   15.20
  -1  -2 -14    8.73    6.02
  -1  -2 -14    5.19    6.91
  -2  -2 -14   12.66    8.88
   2   2  14    6.79    7.58
   2   2  14   15.39   13.12
  -2  -2 -14    6.84    6.52
   0  -1 -14   48.27   12.13
   0  -1 -14   57.17   11.73
   0   1  14   62.21    9.83
   0   1  14   49.60   11.27
   0  -9  -2  754.50   29.10
   0  -9  -2  790.17   28.58
   0   9   2  895.64   32.76
   0   9   2  792.20   28.71
   1  -2 -13   28.62   10.35
   1  -2 -13   33.53   10.26
  -1   2  13   32.44   15.95
  -1   2  13   34.51   13.33
   5  -3   8    2.15    5.28
   5  -3   8    4.40    6.45
  -5   3  -8    9.57    8.10
   5  -3   8    0.05    1.24
  -1   5 -12  266.41   10.94
   1  -5  12  288.78   16.37
   1  -5  12  284.63   13.68
  -1   5 -12  284.31   15.23
  -3   2 -13   17.11    7.34
  -3   2 -13   14.26    8.82
   3  -2  13   21.08    6.18
   3  -2  13   14.52    8.84
  -1   7  -9   19.04   13.27
  -1   7  -9   13.56   10.50
   1  -7   9   16.08   10.95
  -1   7  -9   14.56    4.89
   6  -2   4  565.98   43.43
   6  -2   4  518.95   26.32
  -6   2  -4  492.81   29.83
   6   2   9  606.71   24.28
  -6  -2  -9  658.51   27.07
  -6  -2  -9  659.07   23.45
  -3   7   0    0.30    8.70
  -3   7   0   17.20   14.78
   3  -7   0    2.71    6.41
   3  -7   0    3.55    8.76
   5  -4  -1  134.64    7.90
  -5   4   1  134.65   15.95
  -5   4   1  130.65   18.26
   5  -4  -1  157.05   15.60
  -2   7   5  787.69   27.67
   2  -7  -5  806.06   33.14
   2  -7  -5  744.92   25.33
  -2   7   5  859.97   32.67
   6   6   6 1075.91   31.27
  -6  -6  -6 1299.53   31.77
  -6  -6  -6 1365.48   37.78
   6   6   6 1411.41   35.10
  -3   5   7  970.47   30.78
   3  -5  -7  886.61   33.32
   3  -5  -7  823.40   27.83
  -3   5   7  898.07   28.77
   0  -2  14  110.23   22.71
   0   2 -14  117.35   17.31
   0   2 -14   97.00    7.80
   0  -2  14  131.13   27.05
  -2   2  12   59.93   22.79
  -2   2  12   42.81    6.77
   2  -2 -12   52.00   29.53
   2  -2 -12   48.80    9.87
  -6  -3   5  686.80   19.70
   6   3  -5  566.70   22.23
  -6  -3   5  725.29   26.86
   6   3  -5  755.35   25.54
  -5   3   4   38.90   15.11
   5  -3  -4   57.42   20.86
   5  -3  -4   35.55    7.43
  -5   3   4   31.95   14.12
   4   9  -1   84.27   18.63
  -4  -9   1   77.38    6.16
  -4  -9   1  104.03   18.78
   4   9  -1  113.88   30.94
   2  -8   1  740.47   28.28
  -2   8  -1  765.36   29.66
  -2   8  -1  837.52   43.01
   2  -8   1  808.53   29.64
  -6  -2   5  742.66   37.85
   6   2  -5  788.99   27.43
   6   2  -5  614.48   23.64
   1   6  11  416.37   38.80
  -1  -6 -11  386.46   23.33
   1   6  11  397.61   41.66
  -1  -6 -11  401.13   23.49
  -2  -9  -5   34.73   13.23
   2   9   5   34.54   14.97
  -2  -9  -5   29.01   11.01
   2   9   5   27.53    6.61
  -6   1  -7  171.45   19.35
   6  -1   7  166.54   13.52
   6  -1   7  195.38   13.90
   5   6   9  550.25   27.25
  -5  -6  -9  543.48   16.83
   5   6   9  517.18   38.76
  -5  -6  -9  537.63   24.42
  -6  -5   4  338.08   20.50
   6   5  -4  269.99   17.60
   6   5  -4  372.65   25.37
  -6  -5   4  373.44   22.75
   2  -8   2  248.53   17.69
   2  -8   2  268.56   20.39
  -2   8  -2  247.84   13.17
  -2   8  -2  265.00   18.58
   5   8  -2  608.22   34.57
  -5  -8   2  550.72   17.81
  -5  -8   2  522.42   25.09
   5   8  -2  426.52   22.69
   4   7   9  121.98   17.44
   4   7   9  115.00   16.63
  -4  -7  -9  131.04   14.38
  -1  -4 -13  127.76    9.75
   1   4  13  110.26   13.77
  -1  -4 -13   93.78   17.54
   1   4  13  116.09   12.23
   4  -4  -6   19.55    6.87
  -4   4   6   25.22   14.47
   4  -4  -6   25.37    9.65
  -4   4   6   26.73   10.02
   1   8  -8   15.88   10.33
   1   8  -8    6.02    9.24
  -1  -8   8   18.69   10.90
  -6  -3  -9  152.05   13.38
   6   3   9  141.44   11.81
  -6  -3  -9  156.13   18.95
  -3   5 -10  244.60   15.63
   3  -5  10  207.63   24.64
   3  -5  10  214.78    9.28
   1  -4  13  172.53   22.57
   1  -4  13  153.85   11.77
  -1   4 -13  146.62    8.20
  -1   4 -13  165.57   14.36
  -2  -8  -8   30.43   12.55
  -2  -8  -8   31.14   18.63
   2   8   8   41.27   16.48
   1   9  -5   66.36   23.18
  -1  -9   5   63.92   35.20
  -1  -9   5   55.07    6.55
   1   9  -5   62.25   24.65
   6   7   2 1556.93   40.03
  -6  -7  -2 1160.08   32.88
  -6  -7  -2 1291.69   32.11
  -6  -7  -2 1463.78   38.47
   5   1  -8  263.99   17.88
  -5  -1   8  315.83   20.59
   5   1  -8  322.28   25.04
   3   9  -4 1605.47   40.52
   3   9  -4 1999.26   53.79
  -3  -9   4 1723.22   47.68
   2   9  -5  867.97   33.48
  -2  -9   5  710.04   32.53
   2   9  -5  741.80   26.06
  -6  -7  -1   35.01   15.18
   6   7   1   40.22   17.66
  -6  -7  -1   33.23   12.98
  -6  -7  -1   34.84    9.28
   4   8   7  406.29   25.02
   4   8   7  310.40   22.40
  -4  -8  -7  371.05   21.68
  -2  -1  13  467.55   25.84
   2   1 -13  460.71   27.23
  -2  -1  13  482.13   29.63
   2   1 -13  353.27   18.90
  -3   6  -8  188.18   19.33
   3  -6   8  204.03   25.73
  -3   6  -8  195.40   40.28
   3  -6   8  200.00   15.09
  -4  -1 -13   19.48   11.33
  -4  -1 -13   14.43   10.35
   4   1  13   14.98    5.15
   4   1  13    9.72   12.66
  -4  -9  -3    5.09    4.38
   4   9   3    4.02   14.66
  -4  -9  -3   16.01   14.07
   2  -8   0  749.49   28.68
   2  -8   0  842.89   29.90
  -2   8   0  780.53   28.36
  -2   8   0  848.04   31.08
   6  -2   0  310.18   27.60
  -6   2   0  248.97   18.19
   6  -2   0  268.57    8.49
  -6   2   0  237.50   16.79
  -6   0   4   14.84   10.32
   6   0  -4   21.85   12.34
  -6   0   4   14.12   10.61
   3  -7   4  525.15   29.56
  -3   7  -4  532.74   27.93
  -3   7  -4  496.51   32.85
   3  -7   4  558.21   31.02
  -6  -1  -9  874.24   33.17
   6   1   9  825.66   29.65
  -6  -1  -9  845.37   29.12
  -3  -9  -5 1182.31   35.68
  -3  -9  -5 1082.12   33.54
   3   9   5 1377.34   38.66
  -3   6   5   -3.82    9.05
  -3   6   5   12.39    9.86
   3  -6  -5    0.14    4.23
   3  -6  -5   -1.48    8.75
   0   9  -4  941.50   34.48
   0   9  -4  856.72   35.83
   0  -9   4  875.85   27.15
   0  -9   4  817.15   32.47
   2  -8   3 1367.41   37.01
   2  -8   3 1233.30   35.84
  -2   8  -3 1236.94   35.59
  -2   8  -3 1359.89   37.80
   6   7   3 2035.21   50.14
  -6  -7  -3 1765.42   44.09
   6   7   3 1538.87   42.85
  -6  -7  -3 1995.23   50.87
   2   7  10  468.98   28.24
   2   7  10  424.50   22.16
  -2  -7 -10  441.84   23.45
   2   7  10  456.03   21.97
   4   2  13  137.82    9.38
   4   2  13  154.30   14.46
  -4  -2 -13  175.62   10.87
  -4  -2 -13  156.66   19.47
   2   2 -13   37.12   12.66
  -2  -2  13   37.17   12.30
  -2  -2  13   40.37   18.63
   2   2 -13   27.91   11.23
  -3  -8   7  731.66   28.32
   3   8  -7  796.58   31.46
   3   8  -7  678.15   25.66
  -4   3 -11  728.87   39.76
   4  -3  11  754.42   51.01
   4  -3  11  706.62   22.20
  -4   3 -11  727.09   27.58
   3   8   8  170.93   15.99
  -3  -8  -8  147.16   12.69
   3   8   8  161.59   33.29
   4   0 -10   16.06    8.62
  -4   0  10   10.93   14.09
   4   0 -10    7.51    7.95
   5   4  11  127.42   30.07
  -5  -4 -11  146.29    7.21
   5   4  11  137.07    8.24
  -5  -4 -11  130.39   16.62
   2  -6  10  400.57   25.94
  -2   6 -10  411.51   21.36
  -2   6 -10  397.21   28.15
   1   7 -10  284.22   13.94
  -1  -7  10  285.21   18.39
  -1  -7  10  284.86   21.09
  -5  -7   5  875.86   40.80
   5   7  -5  651.95   23.15
  -5  -7   5  809.13   23.74
  -5  -7   5  802.25   27.17
   3  -7  -1   36.26   14.08
  -3   7   1   35.84   12.55
  -3   7   1   33.60   10.80
   3  -7  -1   39.34   11.32
   6  -2   5  999.29   36.00
   6  -2   5  874.27   28.83
  -6   2  -5  872.12   52.87
  -4   6  -2   45.30   21.95
   4  -6   2   65.06   12.94
   4  -6   2   57.16   16.60
  -4   6  -2   41.41   11.19
  -4   5   4  482.41   26.51
  -4   5   4  533.32   30.09
   4  -5  -4  504.40   26.00
   4  -5  -4  572.83   34.78
   6   7   0  495.11   25.92
  -6  -7   0  500.27   28.71
  -6  -7   0  395.06   22.35
  -6  -7   0  389.05   21.66
  -6  -6   3  882.43   27.93
   6   6  -3  733.05   25.15
  -6  -6   3 1014.38   22.39
  -6  -6   3  918.32   14.14
  -6  -4   5  124.32   22.64
   6   4  -5   90.97   22.69
   6   4  -5  122.91    8.13
  -6  -4   5  122.58    4.95
  -3  -4 -13 1261.43   31.58
  -3  -4 -13 1276.22   41.22
   3   4  13 1190.56   35.44
   3   4  13 1294.37   37.64
   1  -6  11  856.35   31.51
  -1   6 -11  843.23   26.41
   1  -6  11  858.16   32.74
  -1   6 -11  889.40   37.69
   1   4 -13 1531.19   44.07
  -1  -4  13 1550.02   41.79
   1   4 -13 1059.69   26.66
  -1  -4  13 1472.90   52.75
  -5  -4   8    1.17    8.78
   5   4  -8   -0.04    7.75
   5   4  -8    2.85    4.74
  -5  -4   8    2.56    2.57
   4   4 -10  980.48   30.44
  -4  -4  10 1134.79   34.10
  -4  -4  10 1123.49   28.18
   4   4 -10 1140.69   29.79
  -5  -8  -5    1.78    4.08
   5   8   5    2.75    4.49
  -5   1   7  212.13   21.20
   5  -1  -7  224.66   31.08
  -5   1   7  215.48   28.57
  -4   6  -1  122.13   11.47
  -4   6  -1   98.76   12.21
   4  -6   1  107.79    8.90
   4  -6   1  118.21   12.00
   4   9  -2  414.21   22.28
   4   9  -2  556.17   30.93
  -4  -9   2  480.38   27.51
  -4  -9   2  413.23   19.68
  -3  -6  10 1230.25   33.38
   3   6 -10 1166.97   34.56
  -3  -6  10 1283.23   37.86
  -5   4  -6  403.47   27.48
   5  -4   6  416.35   24.58
  -5   4  -6  392.42   19.46
   5  -4   6  397.20   35.08
   4  -2  12  124.67    7.90
  -4   2 -12  133.16   12.74
  -4   2 -12  144.67   31.18
   4  -2  12  138.69   15.87
  -4   6  -3  418.27   23.66
   4  -6   3  402.35   23.51
   4  -6   3  409.02   23.55
  -4   6  -3  380.59   23.50
   6   5   8   26.54    6.25
   6   5   8   20.24   11.30
  -6  -5  -8   30.11    9.11
  -6  -5  -8   25.33    8.62
   3   1  14  233.83   10.58
   3   1  14  265.74   16.15
  -3  -1 -14  245.88   17.01
  -3  -1 -14  266.37   13.49
   0   7 -10  258.61   38.34
   0   7 -10  251.01    9.43
   0  -7  10  268.92   40.31
   2   0 -13 2137.45   55.19
  -2   0  13 2248.28   61.72
  -2   0  13 2152.71   51.84
   2   0 -13 1863.80   46.79
   0   9   3  193.79   14.04
   0   9   3  158.80   12.94
   0  -9  -3  164.91   27.31
   0  -9  -3  160.47   13.25
   2   8  -8  665.46   29.41
   2   8  -8  609.21   37.17
  -2  -8   8  606.79   28.14
   4   0  13  211.13   14.57
  -4   0 -13  290.03   37.67
  -4   0 -13  256.79   19.28
   4   0  13  258.87   17.41
   3   2 -12  461.75   26.31
  -3  -2  12  504.44   28.66
  -3  -2  12  526.06   29.58
   3   2 -12  418.88   24.36
   2  -8  -1  502.70   28.08
  -2   8   1  439.92   24.40
   2  -8  -1  422.42   27.88
  -2   8   1  512.85   29.46
  -5   2   6 1494.28   40.40
  -5   2   6 1453.71   45.46
   5  -2  -6 1682.79   51.99
  -7  -3  -2   32.36    8.63
   7   3   2   28.72   12.07
   7   3   2   45.27   19.21
  -7  -3  -2   35.41   16.59
   6  -1  -3 1626.46   44.33
  -6   1   3 1322.06   39.06
  -6   1   3 1375.70   35.98
   6   1  -5   42.68   12.88
  -6  -1   5   35.25    9.13
  -6  -1   5   35.10   11.05
   3   7  10  140.33   15.71
   3   7  10  139.91   26.47
  -3  -7 -10  144.93   15.44
   3   1 -12    8.26    7.26
  -3  -1  12    8.47    4.28
  -3  -1  12   11.35   12.38
   3   1 -12   13.05    8.54
  -7  -3  -3  708.00   27.02
   7   3   3  662.89   23.13
   7   3   3  819.94   44.69
  -7  -3  -3  732.14   21.96
   0   8  -8  576.28   41.85
   0   8  -8  554.45   31.26
   0   8  -8  573.28   27.14
   0  -8   8  579.14   39.22
  -2   7  -8 1666.55   46.18
  -2   7  -8 1702.11   44.85
   2  -7   8 1641.39   46.08
   2  -7   8 1694.99   44.37
   0   7   9  343.62   25.75
   0   7   9  314.75   17.61
   0  -7  -9  341.12   21.50
   0  -7  -9  317.88   18.96
  -2   2 -14  482.84   42.03
   2  -2  14  442.94   35.44
  -2   2 -14  445.18   24.49
   2  -2  14  420.40   22.47
  -3   0 -14 1752.91   47.98
  -3   0 -14 1626.08   47.29
   3   0  14 1623.02   69.40
   3   0  14 1495.43   38.07
   3  -3 -10  416.06   24.28
   3  -3 -10  357.90   17.37
   3  -3 -10  371.70   23.17
  -3   3  10  440.57   28.28
   1  -8  -5  244.41   33.71
  -1   8   5  251.34   25.40
  -1   8   5  229.43    9.59
   1  -8  -5  216.56   15.36
   5  -2  10    3.99    7.72
  -5   2 -10    4.36    9.92
  -5   2 -10   -3.05    9.36
   5  -2  10    1.17    0.91
  -6  -7  -4  159.98    5.80
   6   7   4  169.06    9.02
  -6  -7  -4  188.62   28.87
   6   7   4  140.86   24.49
   5  -4  -2 1078.24   32.56
  -5   4   2  929.45   25.72
  -5   4   2  924.80   31.81
   5  -4  -2  986.99   13.12
   7   2   2  225.77   15.00
  -7  -2  -2  185.39   13.38
   7   2   2  176.15    7.90
  -7  -2  -2  170.46    5.28
  -2  -6  11    6.48    8.08
  -2  -6  11    5.80   11.42
   2   6 -11    7.55    8.70
  -2   8  -4 1988.71   52.29
  -2   8  -4 2164.30   56.14
   2  -8   4 2160.64   55.47
   2  -8   4 1971.92   60.46
   6   4   9   93.57   14.07
  -6  -4  -9   98.15   11.92
   6   4   9  108.15    8.84
  -6  -4  -9  128.91   24.72
   4   9   4 1780.52   60.39
  -4  -9  -4 1443.64   40.17
  -4  -9  -4 1496.92   39.09
  -7  -2  -3 1401.34   40.51
   7   2   3 1337.98   34.74
  -7  -2  -3 1172.04   27.23
   7   2   3 1658.17   48.35
   7   3   1 2026.50   52.80
  -7  -3  -1 1684.55   44.59
  -7  -3  -1 1874.94   44.70
   7   3   1 1515.80   37.31
   4  -6   0 1648.16   47.70
  -4   6   0 1721.97   47.11
   4  -6   0 1857.80   59.39
  -4   6   0 1611.82   47.96
   1   9   5  637.10   27.91
   1   9   5  579.62   18.73
  -1  -9  -5  567.86   24.03
  -1  -9  -5  579.23   23.68
  -1   8  -7   14.61   12.03
   1  -8   7   15.42    8.65
  -1   8  -7   16.45    7.36
   1  -8   7   15.09   12.75
  -1  -1  14   92.68   13.24
  -1  -1  14   75.40   20.16
   1   1 -14   82.77    8.13
   1   1 -14   90.20   15.05
   6  -2  -1   34.53   26.28
  -6   2   1   36.50   12.57
  -6   2   1   32.12   11.56
   6  -2  -1   27.53   10.29
  -4   5  -8  333.13   24.28
   4  -5   8  347.68   22.05
  -4   5  -8  344.87   21.10
   4  -5   8  324.06   20.94
  -5  -8   3    8.61   10.58
   5   8  -3    5.86   10.29
   5   8  -3    0.75    4.03
  -5  -8   3    2.55    2.13
   4  -6   4  707.38   33.03
  -4   6  -4  619.75   25.81
  -4   6  -4  690.97   32.74
   4  -6   4  646.74   27.43
   0  -2 -14  451.74   24.52
   0   2  14  536.25   24.01
   0   2  14  553.07   22.54
   0  -2 -14  576.20   24.07
  -6  -7   1 2324.53   59.00
   6   7  -1 2824.77   74.84
  -6  -7   1 2727.56   64.38
   6   7  -1 2136.61   51.96
   3  -7   5  765.72   27.68
  -3   7  -5  698.72   27.73
  -3   7  -5  749.67   27.09
   3  -7   5  714.83   27.59
   3   5 -11  799.51   23.61
  -3  -5  11  818.47   30.98
  -3  -5  11  809.62   34.85
   3   5 -11  760.85   29.33
   5  -1  11   24.43    2.53
   5  -1  11   35.41   17.07
  -5   1 -11   34.09   11.07
  -5   1 -11   41.52   21.56
   7   3   4 1409.07   36.46
  -7  -3  -4 1478.32   34.01
  -7  -3  -4 1560.21   41.88
   7   3   4 1809.47   59.14
   1   8   8 1071.66   38.07
   1   8   8  977.64   24.50
  -1  -8  -8  996.24   30.39
  -1  -8  -8 1045.23   55.29
   3   2  14  205.13   10.75
   3   2  14  234.32   28.22
  -3  -2 -14  233.74   17.63
  -3  -2 -14  250.04   12.51
  -3  -7   9  700.74   27.25
   3   7  -9  650.87   25.50
  -3  -7   9  679.63   25.41
   4  -4  10  187.82   21.50
   4  -4  10  205.73   17.37
  -4   4 -10  205.64   15.85
   4  -4  10  199.23   12.59
   5   7   8    3.92    4.59
  -5  -7  -8    1.83    8.07
   5   7   8    1.72    6.04
   3  -4  -9  407.50   24.18
  -3   4   9  489.51   29.19
  -3   4   9  454.73   26.99
   3  -4  -9  420.73   21.07
  -7  -2  -1  218.79   11.77
  -7  -2  -1  231.77   24.38
   7   2   1  265.63   16.82
   7   2   1  192.28   16.95
   0   8   7   23.71   17.12
   0   8   7   26.18    8.66
   0  -8  -7   29.55   15.58
   0  -8  -7   23.57    9.62
  -7  -4  -2    2.57    4.37
   7   4   2    4.14    6.22
   7   4   2    6.60    5.72
  -7  -4  -2    4.63    7.29
   2   3  14  462.83   26.31
   2   3  14  483.90   27.06
  -2  -3 -14  469.23   26.68
  -2  -3 -14  502.75   27.52
  -1   4  12  165.49   12.05
  -1   4  12  168.75   26.31
   1  -4 -12  187.21   14.39
   1  -4 -12  165.76   20.60
  -4  -3 -13   76.06   12.42
  -4  -3 -13   77.27   32.84
   4   3  13   67.31   16.71
   4   3  13   68.79   12.35
  -2  -3  13  109.66   17.62
  -2  -3  13  101.75   14.55
   2   3 -13  104.39   12.93
   2   3 -13   73.92    7.66
   6   6   7  382.75   21.88
   6   6   7  331.98   31.62
  -6  -6  -7  382.33   18.59
  -6  -6  -7  382.01   22.08
  -1   0  14   30.04    8.44
   1   0 -14   37.83   15.15
   1   0 -14   26.06   11.56
  -1   0  14   36.61    8.18
   4  -2  -9   69.86   29.75
   4  -2  -9   71.55   34.12
  -4   2   9   71.30   11.44
  -7  -4  -3  123.29   11.00
   7   4   3  107.24    8.78
  -7  -4  -3  144.20   14.42
  -7  -4  -3  130.82   10.60
   7   2   4  875.80   26.97
  -7  -2  -4  933.41   48.52
   7   2   4 1107.36   21.83
   0  -3  14 2287.90   59.61
   0  -3  14 2312.51   58.94
   0   3 -14 1895.65   47.10
   0   3 -14 2375.91   61.87
   3   3 -12   30.49   14.86
  -3  -3  12   43.34    9.91
  -3  -3  12   54.21   27.65
   3   3 -12   29.51   11.47
  -2   6   8  222.84   15.14
   2  -6  -8  224.20   18.21
  -2   6   8  211.11   11.79
   2  -6  -8  188.88    8.19
   1   7  10   64.15   28.36
  -1  -7 -10   70.11   14.03
   1   7  10   83.10   22.35
   1   7  10   61.98    5.72
   3  -7  -2    1.75    8.81
  -3   7   2    7.26    9.66
   3  -7  -2    0.03    5.06
  -3   7   2    4.90    9.26
   5   0  -8  310.92   21.04
  -5   0   8  300.92   40.41
   5   0  -8  275.99   19.70
  -1   5  11  697.87   29.45
   1  -5 -11  645.84   35.34
   1  -5 -11  648.22   23.75
   6  -2   6 1995.49   51.44
   6  -2   6 2174.49   58.22
  -6   2  -6 1975.80   53.11
   1  -3  14  566.10   30.49
  -1   3 -14  512.44   25.67
  -1   3 -14  596.04   25.15
   1  -3  14  575.52   31.17
  -4   3   8  124.40   15.03
  -4   3   8  120.12   15.14
   4  -3  -8  123.63   14.83
  -2  -5  12   16.91   14.81
   2   5 -12    8.35    9.72
   2   5 -12    9.90    3.39
  -2  -5  12    8.73    9.72
   7   4   1  406.79   19.09
   7   4   1  536.93   24.06
  -7  -4  -1  446.10   20.89
  -7  -4  -1  519.48   19.53
   0   9  -5   12.55   10.71
   0   9  -5   19.98   12.84
   0  -9   5   11.74    5.24
   0  -9   5   10.17    8.87
  -6   0  -9  426.81   30.68
  -6   0  -9  421.99   17.09
   6   0   9  432.77   32.04
   3  -2 -11    0.52    4.50
   3  -2 -11    1.35    2.90
  -3   2  11    4.50    9.45
   3  -2 -11    2.05    6.44
   5   2  12  517.76   25.27
  -5  -2 -12  564.32   22.82
   5   2  12  505.17   18.37
  -5  -2 -12  566.49   26.30
   1   2 -14  312.22   11.56
   1   2 -14  393.16   17.57
  -1  -2  14  413.14   17.83
  -1  -2  14  426.73   13.55
  -1  -3 -14  203.52   12.72
  -1  -3 -14  239.42   11.89
   1   3  14  231.17   13.42
   1   3  14  233.42   16.11
   6  -1   8  226.41   16.00
   6  -1   8  255.92   38.91
  -6   1  -8  218.31   19.46
  -7  -3   0 1410.16   39.77
   7   3   0 1352.27   34.28
  -7  -3   0 1644.99   41.31
   7   3   0 1732.97   47.80
   4   8  -6  148.70    9.57
   4   8  -6  182.49   20.82
  -4  -8   6  169.13   25.22
   2  -8  -2  544.99   25.67
   2  -8  -2  470.02   21.44
  -2   8   2  533.09   29.88
  -2   8   2  493.77   30.76
   0   5  12  110.86   15.85
   0   5  12   93.71   15.85
   0  -5 -12  104.10   16.69
   0  -5 -12   99.82    8.46
  -3  -9   5  183.14   12.38
   3   9  -5  156.44   19.53
   3   9  -5  221.67   16.48
  -3   0  12   59.88   20.76
   3   0 -12   45.85   20.50
   3   0 -12   49.40   14.59
  -3   0  12   48.73    9.19
   4   9  -3   79.60   31.15
  -4  -9   3   54.53   10.50
  -4  -9   3   48.89    2.96
   4   9  -3   49.07    8.31
   2   9   6    0.61    7.05
  -2  -9  -6    0.48    6.93
  -2  -9  -6    5.01    8.37
   2   7 -10   85.72   14.05
  -2  -7  10   78.50   18.58
  -2  -7  10   81.37   13.81
  -5  -1 -12  965.39   37.41
   5   1  12  929.11   37.10
  -5  -1 -12  985.33   36.00
   5   1  12  788.62   26.48
  -1  -9   6   10.03    9.93
  -1  -9   6    9.59    4.44
   1   9  -6   12.98   11.85
   1   9  -6   10.47    8.35
   5  -3   9  138.07   11.58
  -5   3  -9  148.67   24.49
   5  -3   9  137.99    4.91
   5  -3   9  136.78   22.58
   7   4   4  717.32   27.53
  -7  -4  -4  841.24   28.06
  -7  -4  -4  828.72   31.51
  -7  -4  -4  932.25   36.37
   4   6  11   45.17   19.31
  -4  -6 -11   38.06    2.90
   4   6  11   51.00   18.37
  -4  -6 -11   50.01   12.34
  -4   6   1 1099.27   54.74
  -4   6   1 1206.38   35.46
   4  -6  -1 1164.57   34.11
   4  -6  -1 1296.52   38.10
  -1   7   8 2046.18   52.77
   1  -7  -8 2183.73   64.32
   1  -7  -8 2038.64   55.99
  -1   7   8 2311.84   64.06
   6   7   5  580.34   26.65
   6   7   5  736.37   31.39
  -6  -7  -5  687.02   22.86
  -6  -7  -5  713.39   29.02
  -5  -6   7  115.16    8.26
   5   6  -7  116.92    7.09
  -5  -6   7  132.19   12.35
   5   6  -7  101.64   11.82
  -4  -6   9  688.41   30.70
  -4  -6   9  629.23   24.10
   4   6  -9  574.45   24.42
  -3   1 -14  864.00   35.11
  -3   1 -14  773.15   30.76
   3  -1  14  755.50   29.18
   3  -1  14  814.92   33.46
  -2  -9   6  282.54   14.51
   2   9  -6  309.20   48.29
   2   9  -6  256.54   13.21
   7   2   0  754.63   28.14
   7   2   0  938.43   36.83
  -7  -2   0  773.11   30.90
  -7  -2   0  830.44   28.72
   7   3   5  193.14   12.33
  -7  -3  -5  216.66   12.29
  -7  -3  -5  223.79   16.53
   4   5  12  303.87   14.11
  -4  -5 -12  344.81    8.24
  -4  -5 -12  335.71   22.34
   4   5  12  319.00   28.84
   3   9   6   14.86    9.81
  -3  -9  -6   13.97    8.95
  -3  -9  -6   11.36    8.31
  -5  -8  -6  105.85   32.07
   5   8   6  130.05   10.66
   5   8   6   98.85   13.27
   2  -7  -6    1.42    5.17
  -2   7   6   -1.16    9.67
   2  -7  -6    9.99    9.44
  -2   7   6   -0.41    6.33
   6   5  -5   74.47   12.23
  -6  -5   5   92.59   11.86
   6   5  -5  100.94   15.04
  -6  -5   5   90.77    6.16
   5  -3  -5  255.20   16.68
   5  -3  -5  219.14    3.91
  -5   3   5  230.72   35.58
  -5   3   5  223.31   16.19
  -7  -1  -2  347.22   31.76
   7   1   2  358.50   14.46
   7   1   2  301.52   15.88
  -7  -1  -2  273.91    5.95
  -4   6  -5   52.57   13.76
  -4   6  -5   50.07   13.23
   4  -6   5   59.94   10.34
   4  -6   5   52.08   23.02
   7   1   3 2245.76   62.22
   7   1   3 1902.40   48.62
  -7  -1  -3 1910.25   50.71
   0   4  13  808.54   30.98
   0  -4 -13  805.69   30.50
   0   4  13  839.13   34.31
   0  -4 -13  799.20   32.57
  -3   4 -12  137.84   14.87
   3  -4  12  110.41    8.85
   3  -4  12  118.32   25.53
  -3   4 -12  116.82   10.65
   2  -1 -13  425.27   22.22
  -2   1  13  481.79   26.26
   2  -1 -13  389.09   16.05
  -2   1  13  428.50   19.23
  -1   9  -1  249.87   14.65
   1  -9   1  247.54   12.91
  -1   9  -1  211.68   13.32
   1  -9   1  210.97   13.77
  -4   1 -13  153.48   13.68
   4  -1  13  150.68   31.87
  -4   1 -13  148.92   19.33
   4  -1  13  140.04   12.81
  -2   4 -13 1508.64   44.02
   2  -4  13 1403.20   43.32
   2  -4  13 1493.00   46.21
  -2   4 -13 1420.63   39.71
  -2   8  -5 1579.40   44.55
   2  -8   5 1551.78   42.64
   2  -8   5 1432.64   41.00
  -2   8  -5 1479.78   43.95
  -5   4  -7    9.36    5.11
   5  -4   7   20.16   12.14
   5  -4   7   14.18   13.42
  -5   4  -7    9.61    5.52
   0  -9  -4  585.54   38.43
   0  -9  -4  576.70   25.96
   0   9   4  650.19   44.42
   0   9   4  593.89   22.37
  -7  -2  -5  136.94   13.19
   7   2   5  144.29   12.98
   7   2   5  133.38   11.62
  -7  -4   0 1942.04   52.31
  -7  -4   0 2303.37   56.79
   7   4   0 1907.72   48.92
   7   4   0 2400.27   64.33
   6   2  10  135.76   12.43
  -6  -2 -10  164.34   27.47
  -6  -2 -10  148.22   14.13
   2  -5  12  706.05   32.51
  -2   5 -12  667.46   25.99
  -2   5 -12  707.10   35.91
   2  -5  12  685.75   26.75
   1  -9   2  114.47   21.23
   1  -9   2  119.23   18.49
  -1   9  -2  123.01   15.60
  -1   9  -2  106.95   11.32
   6   6  -4   16.84    9.96
  -6  -6   4   18.94    9.59
  -6  -6   4   27.29   17.94
  -6  -7   2  295.98   10.43
  -6  -7   2  264.53   20.03
   6   7  -2  217.85    8.76
  -6  -7   2  295.75   15.06
  -1   9   0   30.97   14.86
  -1   9   0   19.78   13.33
   1  -9   0   19.96    9.88
   1  -9   0   21.56   11.95
   5   3  12  755.73   31.28
  -5  -3 -12  796.97   35.60
   5   3  12  710.95   25.08
  -5  -3 -12  823.31   29.87
  -4  -9  -5  342.48   26.45
   4   9   5  409.66   21.67
  -4  -9  -5  346.75   14.00
   6   3  -6    5.82    7.72
  -6  -3   6    2.88    6.76
   6   3  -6   18.07    9.84
  -1   3  13    8.33   11.24
   1  -3 -13    6.64    6.24
   1  -3 -13    3.00    5.51
  -1   3  13   10.85    6.60
  -5  -5   8   18.27    9.16
  -5  -5   8   18.06   11.00
   5   5  -8   15.31   13.47
   5   5  -8   20.37    6.85
  -2   4  11  340.55   20.44
   2  -4 -11  330.15   28.28
   2  -4 -11  334.57   13.05
   2  -4 -11  336.08    9.75
   4   8   8  747.27   33.95
  -4  -8  -8  804.74   31.71
   4   8   8  852.55   33.79
  -3   3 -13   29.83   11.53
   3  -3  13   19.04   10.17
  -3   3 -13   31.25   12.91
   3  -3  13   24.12    8.85
   4  -1 -10  268.05   13.82
   4  -1 -10  273.92   22.71
  -4   1  10  309.30   18.40
  -7  -1  -1   28.91   10.87
   7   1   1   38.61   10.25
   7   1   1   32.27   13.45
  -7  -1  -1   42.11   10.95
  -6   2   2 1528.05   44.71
   6  -2  -2 1578.68   38.45
  -6   2   2 1513.78   49.65
   6  -2  -2 1867.91   52.30
   0   6  11  382.93   19.67
   0  -6 -11  375.27   19.57
   0   6  11  371.53   12.72
   0   6  11  420.85   24.37
  -7  -1  -4  424.61   14.86
   7   1   4  513.22   24.18
   7   1   4  441.99   27.76
   6   2  -6  120.85   16.34
  -6  -2   6  115.99   13.62
   6   2  -6  104.87   12.15
  -4  -7   8  534.03   22.45
  -4  -7   8  559.22   26.47
   4   7  -8  465.16   29.79
   3  -6   9  346.09   19.90
  -3   6  -9  337.95   17.59
  -3   6  -9  359.57   20.56
   3  -6   9  332.72   16.65
  -1   1  14   28.17   11.97
  -1   1  14   27.89   16.39
   1  -1 -14   25.42   15.06
   1  -1 -14   19.33   10.58
  -6   0   5   -0.34    7.75
  -6   0   5    4.30   10.57
   6   0  -5    3.93    5.42
   6   3  10    9.33    9.15
  -6  -3 -10   15.87   10.86
  -6  -3 -10   25.01   15.11
   6   3  10   22.57    5.49
   5  -4  -3    6.03    4.52
   5  -4  -3    2.58   11.47
  -5   4   3    3.04    8.97
  -5   4   3    3.29    9.62
   3  -7   6   72.29   17.00
   3  -7   6   77.00   13.20
  -3   7  -6   73.25   29.84
  -3   7  -6   65.27   28.16
   1  -7  10   54.28   13.02
  -1   7 -10   70.33   27.01
  -1   7 -10   57.39   11.19
  -1   7 -10   61.19   27.21
   7   4   5 1986.19   51.85
  -7  -4  -5 2483.80   66.91
  -7  -4  -5 2199.90   55.48
  -7  -4  -5 2177.86   51.78
   4  -5  -5  229.52    8.76
  -4   5   5  236.06   20.20
  -4   5   5  223.16   21.35
   4  -5  -5  233.04   16.53
   4   5 -10   22.89   10.77
  -4  -5  10   31.72   14.99
  -4  -5  10   28.29   21.15
   4   5 -10   35.01   14.09
  -7  -3   1  556.26   21.91
  -7  -3   1  468.96   22.64
   7   3  -1  500.87   19.06
   7   3  -1  594.49   25.13
  -3  -3 -14  388.91   17.62
   3   3  14  362.87   13.75
  -3  -3 -14  427.98   13.22
   3   3  14  428.43   40.79
  -5  -6 -10 1181.84   36.88
   5   6  10 1165.63   32.14
   5   6  10 1036.11   34.88
   5   5  11   78.42   15.48
  -5  -5 -11   75.91   29.13
  -5  -5 -11   69.66    8.34
   5   5  11   75.14   17.67
   3  -6  -6   36.85   12.21
   3  -6  -6   38.52    5.74
  -3   6   6   47.67   12.36
  -3   6   6   60.54   14.63
  -7  -5  -2  234.45   14.98
  -7  -5  -2  267.99   28.79
   7   5   2  200.00   10.25
  -7  -5  -2  251.16   12.83
   5   0  12   15.04   12.05
  -5   0 -12    9.83    8.29
   5   0  12    9.33    3.24
  -5   0 -12    9.54    9.30
   5   7  -6  174.27   38.40
  -5  -7   6  237.30   13.14
  -5  -7   6  214.81    4.58
  -5  -7   6  233.40   10.06
  -6   1   4  207.03   26.13
   6  -1  -4  257.77   26.79
  -6   1   4  201.11   35.78
   1   0  15 2202.12   59.46
  -1   0 -15 2324.68   60.71
  -1   0 -15 2004.19   52.93
   1   0  15 2278.16   74.34
   2   6  12  723.56   29.60
  -2  -6 -12  653.11   22.97
  -2  -6 -12  659.37   41.32
   2   6  12  684.11   28.81
   1  -6 -10  631.79   52.55
  -1   6  10  611.92   24.88
   1  -6 -10  597.82   23.07
  -1   6  10  647.59   35.69
  -2  -5 -13  902.43   24.24
   2   5  13  908.36   29.79
  -2  -5 -13  866.66   31.16
   2   5  13  894.86   29.93
  -6  -1 -10  136.98   31.89
  -6  -1 -10  145.01   21.31
   6   1  10  124.19   13.25
   4  -4  -7   77.68   37.01
  -4   4   7   52.72   11.47
  -4   4   7   63.87   14.08
   4  -4  -7   51.50   13.17
   1  -9   3   38.28   18.94
  -1   9  -3   35.63   14.68
   1  -9   3   30.34    8.16
  -1   9  -3   33.19   18.10
   1   8  -9   10.41   11.75
  -1  -8   9    8.90    8.20
   1   8  -9    1.96    4.72
   5   8  -4  749.22   29.20
  -5  -8   4  879.28    8.00
   5   8  -4 1083.99   41.25
  -5  -8   4  968.32   29.33
  -2   3  12  308.11   23.14
   2  -3 -12  287.37   31.59
  -2   3  12  284.24    9.79
   2  -3 -12  269.89   21.75
   2  10   0 1133.23   29.91
   2  10   0 1403.98   44.33
  -2 -10   0 1144.68   30.51
  -2 -10   0 1132.94   36.40
   0   5 -13  619.73   22.26
   0  -5  13  704.66   29.02
   0   5 -13  580.21   26.61
   0  -5  13  744.42   30.15
   3  -5  -8  232.56   19.05
  -3   5   8  255.39   15.49
   3  -5  -8  215.66    8.32
  -3   5   8  263.30   30.63
   1  -9  -1   25.84   14.97
  -1   9   1   20.40    8.37
  -1   9   1   37.40   14.74
   1  -9  -1   33.74   18.35
  -7  -5  -3   27.11   13.45
   7   5   3   29.52   14.19
  -7  -5  -3   31.52    9.94
  -7  -5  -3   35.55    8.41
  -2  -8  -9    3.65    9.01
   2   8   9    6.63   10.21
  -2  -8  -9    2.70    8.83
   0   6 -12 2751.87   73.55
   0  -6  12 2710.64   72.33
   0   6 -12 2392.01   57.65
   0  -6  12 2721.11   72.96
  -4  -2  11 1724.65   49.28
   4   2 -11 1611.80   48.36
  -4  -2  11 1655.37   39.67
   4   2 -11 1546.43   45.55
   5   2  -9  133.31   36.73
   5   2  -9  161.98   11.76
  -5  -2   9  167.20   14.13
  -4  -7 -10  119.18   12.58
   4   7  10   96.74   17.12
   4   7  10  108.51   19.68
   3  -7  -3   47.73   13.24
  -3   7   3   46.03   12.79
  -3   7   3   45.02    9.71
   3  -7  -3   44.87   17.27
   6  -2   7  527.48   23.02
   6  -2   7  579.12   31.89
  -6   2  -7  523.24   24.00
   6   5   9    3.39    4.44
   6   5   9    3.64    7.61
  -6  -5  -9    0.75    9.09
  -6  -5  -9   -0.42    3.55
   7   5   1  250.74   19.22
  -7  -5  -1  318.09   15.67
  -7  -5  -1  282.42   12.98
  -7  -5  -1  303.08    9.41
  -7  -2   1 1425.30   42.15
  -7  -2   1 1281.67   37.94
   7   2  -1 1276.33   32.46
   7   2  -1 1572.08   46.07
  -2 -10   1  231.70    8.24
   2  10  -1  205.44    8.30
  -2 -10   1  209.18   15.06
   2  10  -1  236.65   16.88
   2  10   1 1494.03   39.87
  -2 -10  -1 1554.75   40.56
  -2 -10  -1 1558.57   46.50
   2  10   1 1849.20   53.40
   1   3 -14 1053.63   34.15
  -1  -3  14 1033.47   33.41
  -1  -3  14 1053.90   20.10
   1   3 -14  789.10   13.77
   5   3  -9   36.38   14.81
   5   3  -9   31.61   28.17
  -5  -3   9   37.95   16.05
  -2   5  10  120.35   13.30
   2  -5 -10  115.17    8.99
   2  -5 -10  130.62   18.29
  -2   5  10  125.39   24.47
  -2   8   3  129.81   34.26
  -2   8   3  115.86   11.77
   2  -8  -3   94.06   15.97
   2  -8  -3  100.17    9.49
   6   4  -6  264.18   14.78
   6   4  -6  348.84   10.51
  -6  -4   6  354.01   17.66
  -6  -4   6  325.69    9.71
  -3  -4  12  183.83    9.09
  -3  -4  12  175.47   20.45
   3   4 -12  166.18   15.96
   3   4 -12  162.32    8.28
   4  -6  -2   75.21    7.74
  -4   6   2   78.64   12.59
  -4   6   2   84.42   17.43
   4  -6  -2   94.03   14.71
  -3   5 -11  236.18   16.01
   3  -5  11  233.33   39.28
   3  -5  11  243.52   18.92
  -3   5 -11  238.08   14.34
  -7  -3  -6  113.88   15.76
  -7  -3  -6   94.81    7.99
   7   3   6   94.92   10.98
  -1  -9  -6   15.29   11.16
   1   9   6   15.79   10.87
   1   9   6   12.97    6.28
  -1  -9  -6   19.48   11.59
   3   8  -8  308.47   13.45
  -3  -8   8  316.72   12.75
  -7  -1   0 1126.37   36.55
   7   1   0 1374.44   39.22
   7   1   0 1068.67   29.19
  -7  -1   0 1114.72   33.61
  -3  -8  -9  213.80   15.09
   3   8   9  229.19   14.27
   3   8   9  248.69   23.53
  -1   1 -15 2195.70   57.80
   1  -1  15 2180.48   58.26
   1  -1  15 2051.08   54.39
  -1   1 -15 1909.09   60.50
   7   1   5   12.27   14.11
  -7  -1  -5    4.20    8.66
   7   1   5    2.88    6.52
  -7  -4   1  191.61   16.17
   7   4  -1  251.34   19.36
  -7  -4   1  214.01    8.09
  -7  -4   1  248.08    9.19
   1  -8  -6   21.47   10.49
  -1   8   6   20.44    7.75
   1  -8  -6   20.95    8.46
  -1   8   6   13.21   11.27
  -1  -6  12  411.75   16.16
   1   6 -12  401.32   16.86
  -1  -6  12  416.10   16.94
   1   6 -12  290.85    5.80
   4   9  -4    3.26    4.07
   4   9  -4   10.06   12.36
  -4  -9   4    7.61    5.16
  -1  -1 -15 1509.73   50.34
  -1  -1 -15 1320.82   43.92
   1   1  15 1445.33   42.18
   1   1  15 1478.65   41.66
  -7  -2  -6  234.10   14.52
   7   2   6  236.35   38.56
   7   2   6  225.82   16.96
  -2   3 -14  182.22   11.02
   2  -3  14  186.88   13.71
   2  -3  14  184.74   10.37
  -2   3 -14  219.60   23.38
   6   7   6  491.91   24.50
   6   7   6  638.52   24.27
  -6  -7  -6  581.28   24.22
   4   4  13   14.74   11.42
  -4  -4 -13   19.06    7.45
   4   4  13   21.18    7.06
  -4  -4 -13   29.82   16.37
  -6   3  -2  756.98   40.44
   6  -3   2  864.10   35.06
   6  -3   2  763.64   27.24
  -6   3  -2  789.30   29.98
  -2  -4  13   -0.72   10.15
   2   4 -13    0.16    2.53
   2   4 -13   -0.52   10.33
  -2  -4  13    3.43    4.54
   4   1 -11  779.68   30.34
  -4  -1  11  842.35   35.20
   4   1 -11  720.61   29.77
   0   9  -6  183.53   18.20
   0  -9   6  186.50   22.47
   0  -9   6  164.83    7.82
   0   9  -6  169.84   14.25
  -6   3  -3   47.79   13.13
  -6   3  -3   45.64   13.42
   6  -3   3   66.02   12.92
   6  -3   3   11.08    6.87
   4   3 -11 1869.15   52.37
   4   3 -11 2024.79   51.81
  -4  -3  11 2070.55   49.98
  -4  -3  11 2114.39   57.92
  -7  -5  -4  868.88   32.45
   7   5   4  761.14   37.79
  -7  -5  -4  917.10   31.65
  -7  -5  -4  972.15   48.85
  -3  -6 -12    0.42    1.39
   3   6  12    0.89    6.23
   3   6  12   -0.69    9.08
  -3  -6 -12    4.27    9.67
   2   0  15 1048.05   33.09
   2   0  15  986.34   30.04
  -2   0 -15 1108.43   33.26
  -2   0 -15  998.18   35.51
  -4   6  -6   83.05    8.95
   4  -6   6   82.02   14.37
   4  -6   6   79.02   14.42
  -4   6  -6   85.36   23.58
  -2   7  -9  615.51   33.73
   2  -7   9  589.62   28.49
  -2   7  -9  600.28   25.17
   2  -7   9  630.06   27.16
  -1   8  -8    4.43    7.32
   1  -8   8    2.51    2.50
  -1   8  -8    4.67    4.05
   1  -8   8    4.75    8.45
   6   6   8   15.72   12.47
   6   6   8   14.67    8.17
  -6  -6  -8   16.63    5.67
  -6  -6  -8   13.60   12.17
  -5   5  -2   45.57   19.41
  -5   5  -2   53.34   13.49
   5  -5   2   68.61   13.05
   5  -5   2   49.35   19.89
   6   1  -6    4.13    6.88
  -6  -1   6    3.10    7.83
  -6  -1   6    8.45   11.26
  -2  -1 -15   94.18   14.09
   2   1  15   83.75   16.81
   2   1  15   97.42   26.22
  -2  -1 -15   86.76   14.47
   5   9   1  199.47   17.04
  -5  -9  -1  182.29   12.96
   5   9   1  166.47   10.53
  -5  -9  -1  194.25   27.22
  -4   5  -9  496.53   12.98
  -4   5  -9  555.65   52.08
   4  -5   9  530.04   23.95
   4  -5   9  586.55   28.78
  -3   1  12    3.41    2.37
  -3   1  12    0.41   12.37
   3  -1 -12    6.51    8.65
   3  -1 -12    3.62    7.50
   2  10  -2  713.63   33.69
  -2 -10   2  646.36   23.18
   2  10  -2  557.89   21.39
  -2 -10   2  594.72   26.54
   5  -5   3  140.96   10.99
  -5   5  -3  129.82   38.79
  -5   5  -3  148.07   11.04
   5  -5   3  152.38   34.15
  -2 -10  -2  203.85   11.15
   2  10   2  249.88   17.65
   2  10   2  193.10   19.81
  -2 -10  -2  219.80   20.54
   3  10   0 1414.41   58.95
   3  10   0 1089.80   28.15
  -3 -10   0 1166.29   35.52
  -3 -10   0 1121.32   30.72
   3   5  13  561.32   25.28
  -3  -5 -13  552.65   27.00
   3   5  13  569.80   24.54
  -3  -5 -13  584.72   21.16
  -7  -5   0  199.27   10.66
   7   5   0  234.17   12.60
  -7  -5   0  168.61   16.15
  -7  -5   0  170.99   14.26
   0   8  -9  325.83    7.00
   0  -8   9  339.08   19.69
   0   8  -9  341.30   37.73
   0   8  -9  354.25   26.41
   5   1  -9  151.04   11.80
   5   1  -9  104.64   18.67
  -5  -1   9  159.80   30.56
   6  -3   1 3195.06   94.77
  -6   3  -1 2641.89   70.99
  -6   3  -1 2811.80   68.32
   6  -3   1 2800.69   68.51
   3  10   1 1256.92   31.37
   3  10   1 1714.42   59.32
  -3 -10  -1 1440.80   43.32
  -3 -10  -1 1402.14   37.30
  -1  -5  13  480.04   16.00
   1   5 -13  351.21    8.05
   1   5 -13  524.67   31.01
  -1  -5  13  497.12   34.65
   2  -8   6  372.64   15.97
  -2   8  -6  425.83   17.15
  -2   8  -6  402.70   21.26
   2  -8   6  416.05   21.67
  -5  -9  -2  189.07    4.75
   5   9   2  226.11   14.76
  -5  -9  -2  187.67   12.44
  -5  -9  -2  208.94   12.67
  -2   6 -11  696.00   25.86
  -2   6 -11  719.97   31.11
   2  -6  11  693.32   26.47
   2  -6  11  701.31   31.57
   0   3  14  933.24   30.54
   0  -3 -14  936.20   29.37
   0   3  14  978.32   29.08
   0  -3 -14  870.20   30.24
  -5   5  -1    3.96   10.30
   5  -5   1   -0.37    5.22
  -5   5  -1    3.67    5.11
   5  -5   1   10.82   12.30
   1  -9   4    5.86    6.84
  -1   9  -4    5.91    5.42
  -1   9  -4    4.95    4.27
   1  -9   4    7.38    5.20
  -1  -5 -13   13.03   10.47
   1   5  13   11.54   10.08
   1   5  13    1.67    7.34
  -1  -5 -13    3.04    6.36
  -6   3  -4 1210.09   29.91
  -6   3  -4 1151.31   35.93
   6  -3   4 1343.43   39.81
   6  -3   4 1167.27   34.97
  -6  -4 -10   54.65   10.46
   6   4  10   56.06    7.59
   6   4  10   58.85   13.37
  -6  -4 -10   61.23   12.95
   2   8  -9  231.00   13.55
   2   8  -9  266.56   21.16
  -2  -8   9  269.33   14.83
  -5   2   7 1299.42   40.07
  -5   2   7 1428.85   40.81
   5  -2  -7 1474.42   56.33
  -5  -9   0  801.90   32.47
   5   9   0  751.05   28.01
  -5  -9   0  812.18   29.10
   5   9   0  989.59   39.80
   1  -5  13   -2.71    8.57
  -1   5 -13    4.53    7.06
  -1   5 -13    1.81    3.90
   1  -5  13    3.10    4.18
   1  -9  -2  182.04   12.30
   1  -9  -2  215.07   24.24
  -1   9   2  198.00   24.08
  -1   9   2  227.67   25.38
  -1 -10   0  156.22   15.25
   1  10   0  162.53    8.49
   1  10   0  187.07   16.63
  -1 -10   0  150.63   17.31
  -4   3 -12   60.89   13.80
  -4   3 -12   65.72   14.47
   4  -3  12   56.10    6.95
   4  -3  12   65.54   26.68
  -6  -7   3   24.55   11.07
  -6  -7   3   21.56    7.23
  -6  -7   3   19.68    8.94
   6   7  -3    8.62    5.63
  -7  -4  -6  165.82   17.88
   7   4   6  142.37   30.62
  -7  -4  -6  149.19    9.84
   3   9  -6  336.29   47.19
   3   9  -6  278.92   12.25
  -3  -9   6  328.77   16.00
  -1 -10   1   -0.89    3.89
   1  10  -1    4.72   11.24
  -1 -10   1    0.77   10.90
   1  10  -1    0.55    1.35
  -5  -7  -9    9.45    8.39
   5   7   9    2.57    4.90
   5   7   9   -0.26   10.54
   3  10  -1   21.01   16.63
   3  10  -1    1.98    3.78
  -3 -10   1    6.49    5.00
  -3 -10   1    5.03   10.26
  -5   1   8   80.04   23.88
   5  -1  -8   81.77   30.48
  -5   1   8   78.07   15.50
   0   0  15  131.03   11.98
   0   0  15  127.17   11.47
   0   0 -15  139.67   15.30
   0   0 -15  102.61   21.05
  -5  -4 -12 2560.68   67.78
  -5  -4 -12 2448.15   59.83
   5   4  12 2230.26   55.84
   5   4  12 2290.76   65.67
   6  -1   9  883.98   35.81
   6  -1   9  806.72   48.45
  -6   1  -9  831.63   41.29
  -5  -8  -7  227.97   24.62
   5   8   7  234.87   11.99
   5   8   7  211.35   19.46
   1   6  12  114.25   43.90
  -1  -6 -12   91.78    6.15
   1   6  12  102.19   16.15
  -1  -6 -12  107.77   16.04
   0   1 -15   27.99    6.03
   0   1 -15   24.23   13.29
   0  -1  15   34.73   11.38
   0  -1  15   28.48   10.75
  -3   2 -14 1102.86   39.46
   3  -2  14 1093.70   44.70
   3  -2  14 1060.36   29.65
  -3   2 -14 1142.51   34.89
   5  -2  11  436.57   19.58
  -5   2 -11  471.33   36.03
  -5   2 -11  437.50   28.00
   2   7  11 2572.55   66.89
   2   7  11 2850.13   73.99
   2   7  11 2523.19   60.18
  -2  -7 -11 2423.23   76.13
  -2  -4 -14  819.88   38.99
  -2  -4 -14  875.78   31.34
   2   4  14  828.44   45.61
   2   4  14  831.88   33.56
   0   9   5  555.74   36.09
   0   9   5  503.19   19.44
   0  -9  -5  481.13   21.47
   0  -9  -5  488.28   28.54
   1   9  -7   22.47   13.25
  -1  -9   7   12.01   14.93
   1   9  -7    8.78    8.07
   5  -5   4  142.95   22.28
  -5   5  -4  145.31   36.77
   5  -5   4  155.78   21.57
  -5   5  -4  135.47    8.98
  -4  -9  -6   33.50   15.58
  -4  -9  -6   33.91   13.98
   4   9   6   36.75   11.21
  -2  -9  -7   12.20   10.42
   2   9   7    9.56    7.20
  -2  -9  -7   15.68    8.99
  -1  -7  11   31.32   14.43
   1   7 -11   39.31   22.25
  -1  -7  11   44.97   13.20
  -3 -10  -2  429.89   18.96
   3  10   2  394.10    6.55
   3  10   2  513.48   21.22
  -3 -10  -2  420.48   22.53
  -7   0  -3  417.31   29.27
   7   0   3  476.03   17.51
   7   0   3  415.73   19.97
  -7  -3   2   -2.42    8.26
  -7  -3   2    4.07    5.16
  -7  -3   2    0.17    2.33
   7   3  -2    4.05    8.34
   0  -4  14  441.31   16.46
   0   4 -14  369.56    9.76
   0  -4  14  435.59   16.90
   0   4 -14  447.20   19.75
  -7   0  -2   58.07   12.07
  -7   0  -2   42.86    7.16
   7   0   2   51.07    6.84
   7   0   2   69.03   27.67
  -5  -4   9    0.15    2.55
   5   4  -9    2.13    3.52
  -5  -4   9    3.06    4.33
   5   4  -9    4.95    8.24
  -5   4  -8    1.16   10.52
   5  -4   8   -3.27    7.93
   5  -4   8    8.89   12.44
  -2   1 -15 1037.72   23.08
   2  -1  15  968.23   35.14
  -2   1 -15  951.43   41.82
   2  -1  15 1004.83   38.38
  -1 -10  -1  578.04   33.56
   1  10   1  569.07   21.34
   1  10   1  663.24   30.21
  -1 -10  -1  552.51   23.05
  -5  -9  -3  938.02   29.51
   5   9   3 1228.02   43.77
  -5  -9  -3 1048.61   29.95
  -6   2   3 1116.86   35.74
  -6   2   3 1345.27   36.84
   6  -2  -3 1592.84   44.67
  -7  -5  -5 1431.52   40.22
  -7  -5  -5 1340.28   34.45
  -7  -5  -5 1315.17   36.42
   7   5   5 1127.48   32.99
   0  -8  -8    4.11    5.90
   0  -8  -8   10.96   10.86
   0   8   8    5.94   11.84
   0   8   8    3.62    2.57
  -3  -9  -7  606.99   25.07
   3   9   7  717.63   38.47
  -3  -9  -7  642.30   28.37
   7   1  -1  982.49   25.05
  -7  -1   1 1005.12   33.33
  -7  -1   1  945.22   26.42
   7   1  -1 1263.99   37.74
   0   7 -11    9.46   12.36
   0  -7  11    5.27    5.39
   0  -7  11    1.93   10.22
   0   7 -11    5.21    3.30
  -6   0 -10   36.17   15.59
  -6   0 -10   31.41   12.36
   6   0  10   17.27   10.82
  -1 -10   2   49.06   36.53
   1  10  -2   43.97   19.01
  -1 -10   2   32.18   12.37
   1  10  -2   44.13   13.77
   7   1   6  103.11   38.38
  -7  -1  -6  102.77   19.54
   7   1   6   91.84   14.81
  -1   6 -12    4.70    3.35
  -1   6 -12   14.22   10.38
   1  -6  12    1.79   10.20
   1  -6  12    8.25    8.43
  -3  -7 -11  366.88   33.51
   3   7  11  365.10   37.17
   3   7  11  376.93   15.36
  -5   5   0   -2.51    9.50
   5  -5   0   10.07    8.69
  -5   5   0    2.58    7.07
   5  -5   0    0.85    3.74
   6  -3   0 1041.63   28.08
   6  -3   0 1231.21   37.88
  -6   3   0 1019.46   36.96
  -6   3   0 1062.65   29.43
  -4  -8   7    9.36   14.48
   4   8  -7   10.40    9.38
  -4  -8   7   13.29    8.73
  -6  -8  -2  816.97   30.34
  -6  -8  -2  701.27   24.18
   6   8   2  890.70   39.58
  -6  -8  -2  641.07   26.13
   2   9  -7 1711.27   47.27
   2   9  -7 1913.89   55.44
  -2  -9   7 1781.56   50.14
   1   8   9  184.84    8.03
   1   8   9  188.48   15.17
  -1  -8  -9  178.59   14.57
  -1  -8  -9  188.82   15.74
  -3   7  -7 1624.56   45.06
   3  -7   7 1561.66   51.27
   3  -7   7 1660.78   46.65
  -3   7  -7 1564.54   44.70
  -5  -9   1 1036.17   27.98
  -5  -9   1 1054.75   32.32
   5   9  -1  908.70   24.58
   5   9  -1 1293.71   44.75
  -6  -8  -1    1.29    4.67
  -6  -8  -1    0.66    3.65
  -6  -8  -1    1.26    4.18
   6   8   1    6.78    4.26
  -4  -1 -14  166.74   15.50
   4   1  14  169.94   19.14
  -4  -1 -14  162.82   27.42
   4   1  14  145.30   14.97
   0   7  10   95.64   47.19
   0  -7 -10   91.97   10.22
   0  -7 -10   98.14   14.07
   0   7  10   90.19   10.23
  -7   0  -4  113.64   12.91
   7   0   4  134.20   18.33
   7   0   4  107.33   13.46
  -1   2 -15  628.79   31.04
  -1   2 -15  761.52   34.68
   1  -2  15  713.48   29.98
   1  -2  15  745.61   30.19
  -4   4 -11   22.87    9.11
   4  -4  11   31.98   14.64
  -4   4 -11   31.83   13.18
   4  -4  11   26.68   10.19
   7   2  -2   33.84   12.15
  -7  -2   2   21.23    7.49
  -7  -2   2   26.59    8.85
  -7  -2   2   22.21    7.25
  -2 -10   3 2341.80   64.19
   2  10  -3 2714.29   76.64
   2  10  -3 2255.08   56.88
  -2 -10   3 2481.10   59.38
  -7   0  -1    2.52    1.82
   7   0   1    2.53    3.82
   7   0   1    4.77    7.81
  -7   0  -1    3.89    6.06
  -2   2  13 1575.30   39.57
  -2   2  13 1578.55   48.05
   2  -2 -13 1573.03   44.47
   2  -2 -13 1654.22   45.02
   2  10   3    7.33    4.39
  -2 -10  -3   15.49   12.41
  -2 -10  -3   20.15    8.90
   2  10   3   23.38   16.51
   6  -3   5 1809.38   47.22
   6  -3   5 2003.57   54.68
  -6   3  -5 1833.80   52.44
   4  -2  13  978.40   33.37
  -4   2 -13 1056.98   29.93
   4  -2  13  824.73   54.22
  -4   2 -13 1040.90   26.03
   2   2  15   30.79   13.52
   2   2  15   28.19   11.95
  -2  -2 -15   30.57   19.75
  -2  -2 -15   21.77    9.04
   1  -4  14    6.99    6.19
   1  -4  14    6.67    6.55
  -1   4 -14   13.21   14.56
  -1   4 -14    8.79    7.29
   5  -3  10   58.33    6.28
   5  -3  10   69.01   28.13
   5  -3  10   70.17   12.03
  -5   3 -10   58.37   13.01
   6   6  -5  100.99   12.51
  -6  -6   5  139.00   13.70
   6   6  -5  135.10   16.84
  -6  -6   5  138.01    7.78
   1  -2 -14   40.28   15.21
  -1   2  14   38.35   21.67
  -1   2  14   43.24   14.70
   1  -2 -14   42.22    9.68
  -7  -4   2   64.67   11.10
  -7  -4   2   68.63   13.30
   7   4  -2   63.25   15.03
  -7  -4   2   71.49   13.11
  -3 -10   2  409.32    7.82
   3  10  -2  452.55   22.02
   3  10  -2  367.19   13.05
  -3 -10   2  415.89   21.41
  -3  -6  11   25.19   18.40
  -3  -6  11   21.22    9.95
   3   6 -11    5.76    9.35
  -7  -5   1   -1.23    5.76
  -7  -5   1    5.30    6.26
  -7  -5   1    1.29    4.74
   7   5  -1    2.96    3.69
  -4   0  11  170.74   23.38
   4   0 -11  133.85   29.11
   4   0 -11  141.51   10.38
   5  -4  -4  347.17   18.11
  -5   4   4  306.97   16.86
  -5   4   4  335.62   15.03
   5  -4  -4  342.58    8.04
  -1  -2 -15  365.48   15.70
  -1  -2 -15  307.39   14.28
   1   2  15  348.33   16.11
   1   2  15  334.28   18.72
  -7  -3  -7 1377.78   38.66
  -7  -3  -7 1405.71   46.55
   7   3   7 1247.05   36.79
  -4  -2 -14   15.56    6.22
   4   2  14   12.43    5.73
  -4  -2 -14   17.80    8.96
   4   2  14   15.25    7.60
  -5   1 -12   35.64    9.99
  -5   1 -12   44.27   12.43
   5  -1  12   27.87    6.15
   5  -1  12   43.99   15.99
  -6  -8  -3 1824.79   48.21
  -6  -8  -3 1648.51   40.91
   6   8   3 1928.36   50.84
  -6  -8  -3 1461.08   42.94
  -4  -4  11  832.20   29.77
   4   4 -11  865.35   30.47
  -4  -4  11  838.58   35.14
   4   4 -11  750.74   37.66
  -1  -4 -14  190.82   22.30
  -1  -4 -14  180.59   15.00
   1   4  14  198.01   13.27
   1   4  14  190.55   13.56
  -6  -5   6  819.48   28.93
   6   5  -6  861.06   29.88
   6   5  -6  662.89   27.66
  -6  -5   6  843.92   33.10
  -4   6   3  428.54   22.65
   4  -6  -3  410.35   15.19
   4  -6  -3  455.73   20.34
  -4   6   3  429.42   45.91
   0   1  15  337.70   15.58
   0  -1 -15  297.23   14.38
   0  -1 -15  357.51   18.29
   0   1  15  341.31   13.12
  -7  -2  -7 1531.39   42.61
  -7  -2  -7 1698.18   56.45
   7   2   7 1483.23   42.05
   6   8   0  163.26   11.25
  -6  -8   0  177.97   19.00
   6   8   0  215.92   13.54
  -6  -8   0  207.22   11.53
  -5   3   6 2270.96   61.17
  -5   3   6 2378.86   62.98
   5  -3  -6 2586.98   71.26
   3  -7  -4   26.48   10.03
   3  -7  -4   24.06    7.68
  -3   7   4   12.63    9.11
  -3   7   4   20.77    7.32
   1  10   2  482.00   18.81
   1  10   2  538.01   28.40
  -1 -10  -2  436.08   20.58
  -1 -10  -2  490.28   21.81
   2  -8  -4 3586.54   89.43
   2  -8  -4 3932.26  100.86
  -2   8   4 4143.73   60.93
  -2   8   4 3837.53   32.80
   0   2 -15  101.35   11.62
   0  -2  15  114.62   12.69
   0   2 -15   87.32    7.57
   0  -2  15  116.84   12.23
  -3 -10  -3  148.01   10.21
   3  10   3  183.61   16.54
  -3 -10  -3  146.22   15.83
  -2   7   7   12.53    8.43
   2  -7  -7    7.07   10.87
   2  -7  -7   20.26    8.82
  -2   7   7   17.04   12.74
  -3  -7  10   56.43   12.24
   3   7 -10   36.27   13.22
  -3  -7  10   44.91   25.91
  -6   2  -8  163.46   13.60
   6  -2   8  170.80   20.00
   6  -2   8  150.20   20.72
   5  -5   5   84.50   17.25
  -5   5  -5   89.53   16.70
  -5   5  -5   86.98    9.92
   5  -5   5  100.21   12.66
  -5  -8   5  894.08   33.26
   5   8  -5  721.16   27.35
   2  -6  -9    2.62   12.16
  -2   6   9    2.72    5.42
   2  -6  -9    2.25    3.06
  -2   6   9    0.33    4.53
   1  -9   5  141.50   12.26
   1  -9   5  131.42   23.49
  -1   9  -5  142.66   32.50
  -1   9  -5  136.92   14.84
   5   9   4  720.83   30.17
  -5  -9  -4  657.08   26.05
  -5  -9  -4  577.41   27.11
  -4   0 -14 1352.37   38.82
   4   0  14 1383.78   44.03
  -4   0 -14 1303.83   41.70
   4   0  14 1133.40   29.87
  -3  -4 -14 1134.13   35.41
   3   4  14 1072.50   33.90
   3   4  14 1134.37   34.25
  -3  -4 -14 1169.33   30.91
  -1 -10   3   14.29    6.31
   1  10  -3   10.11    8.05
   1  10  -3    9.20    7.89
  -1 -10   3    2.51   11.51
  -6  -7  -7  717.75   29.00
   6   7   7  764.27   30.62
   6   7   7  590.03   25.28
  -4   6  -7   54.14   22.21
  -4   6  -7   51.97   22.92
   4  -6   7   52.18   10.26
   4  -6   7   54.59   21.23
   1  -9  -3    7.02    7.23
   1  -9  -3    2.88    7.44
  -1   9   3    0.72    3.81
  -1   9   3    8.78   12.69
  -7  -6  -2  103.83    8.88
   7   6   2   81.13    8.29
  -7  -6  -2  105.83   11.23
  -7  -6  -2  104.77   14.49
   7   0   5   13.33    7.01
   7   0   5   10.17   15.91
  -7   0  -5   20.62    8.59
   2   1 -14   30.26   11.96
  -2  -1  14   28.94   13.37
  -2  -1  14   31.18    5.57
   2   1 -14   22.67   10.53
   3  -3 -11  459.48   34.75
   3  -3 -11  396.60   10.90
  -3   3  11  495.05   27.03
   3  -3 -11  417.46   33.34
  -5  -6   8  339.24   16.16
  -5  -6   8  314.28   15.07
   5   6  -8  263.18   17.93
   5   6  -8  331.48    9.41
   4   8   9  540.57   27.90
   4   8   9  551.84   26.08
  -4  -8  -9  555.21   23.58
  -4  -9   5  302.42   14.43
   4   9  -5  324.39   41.33
   4   9  -5  282.88   22.71
   4  -3  -9    8.26    6.82
  -4   3   9    7.94    8.92
  -4   3   9   32.10   12.20
   7   0   0  196.68   11.00
   7   0   0  236.38   15.42
  -7   0   0  194.04   10.49
  -7   0   0  209.44   18.88
   5   0  -9 1011.44   21.47
  -5   0   9  983.37   31.32
   5   0  -9  882.72   29.58
   3  -4 -10  946.58   32.21
  -3   4  10 1022.78   33.54
  -3   4  10  998.30   31.77
   3  -4 -10  888.93   24.34
   6  -1  -5   55.77   22.06
  -6   1   5   51.57   13.69
  -6   1   5   53.34   12.33
   2   6 -12   82.59   14.77
  -2  -6  12   91.03   19.23
  -2  -6  12   83.32   33.85
  -7  -6  -3  618.16   25.45
   7   6   3  470.75   28.71
  -7  -6  -3  546.35   21.20
  -5   5   1  144.50   28.03
   5  -5  -1  181.15   15.16
   5  -5  -1  143.12   24.60
  -5   5   1  149.33   44.88
   1  -7  -9  234.24   19.24
   1  -7  -9  216.19   21.32
  -1   7   9  236.87   16.94
  -1   7   9  214.89   12.24
   4  -5  -6  119.28   15.87
  -4   5   6  112.62   13.73
   4  -5  -6  100.40    5.86
  -4   5   6  115.41   21.15
  -6   0   6  142.99   15.14
  -6   0   6  178.51   14.55
   6   0  -6  178.26   13.02
  -5  -9   2   89.25   15.90
   5   9  -2   84.33    7.18
   5   9  -2  117.93   24.47
  -5  -9   2   89.73    9.17
   1   7  11  850.61   29.87
  -1  -7 -11  896.91   31.97
   1   7  11  877.13   39.37
   1   7  11  920.96   22.49
   6   2  11  433.89   23.75
  -6  -2 -11  445.13   18.50
  -6  -2 -11  454.98   14.65
  -7  -6  -1  117.84   10.60
  -7  -6  -1  103.78   16.67
  -7  -6  -1  102.78   10.99
  -7  -6  -1  127.67   10.46
  -2  -2  14   28.51   16.93
  -2  -2  14   30.92   11.40
   2   2 -14   22.82   12.51
   2   2 -14   37.03   12.45
  -6  -8  -4  620.94   26.08
  -6  -8  -4  739.76   28.22
   6   8   4  804.16   35.12
  -1  -4  14 2054.06   54.31
   1   4 -14 1456.87   36.96
   1   4 -14 2065.30   57.65
  -1  -4  14 2085.02   57.82
  -7  -4  -7  109.17   19.64
  -7  -4  -7   90.99   17.45
   7   4   7   83.36   27.88
   4  -2 -10  479.52   39.11
  -4   2  10  483.30   24.45
   4  -2 -10  442.59   23.70
   6  -3  -1   34.45   11.59
   6  -3  -1   48.30   15.76
  -6   3   1   47.71   18.27
  -6   3   1   39.90   16.59
   3  -6  10  136.13   14.70
   3  -6  10  132.50   15.76
  -3   6 -10  150.52   20.06
   6   3  -7  568.89   24.79
   6   3  -7  449.23   27.50
  -6  -3   7  539.84   32.84
   7   5   6   34.54   10.85
   7   5   6   32.58   14.88
  -7  -5  -6   27.33    8.69
  -7  -5  -6   33.34   16.58
   0  -9   7 1076.40   34.37
   0   9  -7 1078.55   46.61
   0   9  -7 1169.72   42.11
   0  -9   7 1062.71   36.85
  -3  -1 -15  104.35   11.78
  -3  -1 -15  112.87   39.84
   3   1  15  120.97   22.89
   3   1  15   93.65    9.03
   6   8  -1 1352.09   42.45
   6   8  -1 1823.21   58.67
  -6  -8   1 1502.52   48.82
  -6  -8   1 1590.05   49.21
   2  -8   7 1930.59   63.10
  -2   8  -7 1865.06   60.94
   2  -8   7 1818.62   60.21
  -2   8  -7 1906.57   65.19
   5   2  13  169.54   11.79
  -5  -2 -13  220.62   14.09
   5   2  13  220.58   47.08
  -5  -2 -13  211.48   15.64
  -3  -2  13    0.92    1.88
   3   2 -13    7.55   13.73
   3   2 -13   -0.15    6.07
  -3  -2  13   -0.11    9.73
   6   2  -7  210.57   10.53
   6   2  -7  161.76   21.41
  -6  -2   7  216.27   26.14
  -1  -9  -7  193.50   35.69
  -1  -9  -7  175.81   30.32
   1   9   7  173.31    6.43
   1   9   7  195.23   16.15
   3  10  -3  234.90   13.87
  -3 -10   3  262.33   18.19
   3  10  -3  305.57   23.02
  -2  -7  11   37.49   18.97
  -2  -7  11   46.80   21.14
   2   7 -11   35.59   14.36
   5   7  -7  153.42   34.85
  -5  -7   7  186.67   24.22
  -5  -7   7  166.99   10.33
  -3  -5  12   13.41    9.56
  -3  -5  12   10.08    9.79
   3   5 -12    9.21    4.84
   3   5 -12   -1.70    9.84
  -6   3  -6  480.27   26.87
   6  -3   6  487.96   25.02
   6  -3   6  496.93   26.36
   3   1 -13    4.65    7.08
  -3  -1  13    7.85   11.46
  -3  -1  13    9.79    5.58
   3   1 -13   11.39    5.26
   3  -6  -7  546.66   25.53
  -3   6   7  652.29   27.88
   3  -6  -7  644.95   29.45
  -3   6   7  687.28   37.12
   5   1  13   47.63   12.74
   5   1  13   68.52   15.60
  -5  -1 -13   71.53   16.27
  -5  -1 -13   65.40    9.22
   6   3  11  125.50   12.03
  -6  -3 -11  121.80   25.86
  -6  -3 -11  130.26   10.91
   7   1  -2 1141.25   40.68
  -7  -1   2  950.27   31.19
  -7  -1   2  834.96   32.16
  -4  -6 -12   77.84   14.59
   4   6  12   58.85   23.91
   4   6  12   59.59   22.66
   3   0  15  703.43   30.36
  -3   0 -15  748.02   31.09
  -3   0 -15  670.64   36.60
   3   0  15  643.26   25.19
  -6  -7   4  167.40    8.28
  -6  -7   4  150.31   10.14
  -6  -7   4  194.85   31.21
   6   7  -4  122.89   15.54
  -2 -10   4  673.98   36.51
   2  10  -4  626.85   28.84
   2  10  -4  784.14   36.36
   2  -2  15  693.06   29.69
   2  -2  15  648.53   26.10
  -2   2 -15  651.00   27.51
  -2   2 -15  653.87   46.47
   4   6 -10   49.87   18.80
  -4  -6  10   51.68   23.08
  -4  -6  10   63.98   31.24
  -7  -1  -7  365.14   24.41
   7   1   7  332.38   35.61
   7   1   7  394.63   35.05
   7   6   4   22.85   12.07
   7   6   4   19.88    8.88
  -7  -6  -4   24.95    7.54
  -7  -6  -4   27.08    8.82
  -2 -10  -4  833.99   31.21
   2  10   4  947.58   38.30
  -2 -10  -4  869.70   31.29
   4   3  14  169.39   19.09
  -4  -3 -14  175.00   38.64
   4   3  14  128.74    7.65
  -4  -3 -14  165.70   11.04
  -2   0  14   50.19   18.89
   2   0 -14   56.31   25.17
   2   0 -14   27.17   19.78
  -2   0  14   41.92    7.44
  -6  -5 -10   12.38    6.93
  -6  -5 -10   12.33    7.52
   6   5  10   13.24    7.84
   6   5  10   14.79    5.74
  -7  -3   3  427.86   21.05
   7   3  -3  444.44   32.45
  -7  -3   3  304.45   26.01
  -6  -1 -11 2531.19   80.74
   6   1  11 2450.60   76.44
  -6  -1 -11 2560.00   81.59
   1  10   3  186.52   41.14
   1  10   3  163.49    7.68
  -1 -10  -3  168.39   12.34
  -1 -10  -3  147.04   27.95
   6   6   9  450.50   21.13
   6   6   9  378.61   22.61
  -6  -6  -9  451.88   37.99
  -1   8   7  156.28    9.62
   1  -8  -7  165.69   26.53
   1  -8  -7  161.95   12.67
  -1   8   7  186.03   19.28
  -7  -6   0    4.91    4.44
  -7  -6   0    2.04    4.33
  -7  -6   0    2.91    7.98
  -7  -6   0    5.87    8.21
   1  -5 -12  194.63   26.13
   1  -5 -12  198.34   24.89
  -1   5  12  171.56   20.45
  -1   5  12  191.71   15.45
   4   7  -9  189.85   12.36
  -4  -7   9  201.72   11.26
  -4  -7   9  236.28   33.39
  -7  -5   2   64.73   27.51
  -7  -5   2   84.23   16.56
   7   5  -2   78.06   29.23
  -7  -5   2   69.67   16.23
  -5  -5   9  370.00   21.67
   5   5  -9  283.76   16.83
   5   5  -9  354.07   20.69
  -5  -5   9  354.71   17.40
   4  10   1   38.34   12.35
  -4 -10  -1   55.57   28.30
  -4 -10  -1   45.44   19.50
   4  10   1   58.03   22.09
  -3 -10  -4 1043.36   39.50
   3  10   4 1218.75   51.97
  -3 -10  -4 1021.40   34.73
  -5  -6 -11   76.71   13.53
   5   6  11   85.31   33.79
   5   6  11   90.74    8.92
   4  10   0   22.10   11.00
  -4 -10   0   20.47    5.71
  -4 -10   0   19.07   10.93
   4  10   0   17.88    5.87
   5  -5   6   51.29   22.97
   5  -5   6   42.53   22.32
  -5   5  -6   32.98   11.91
  -5   5  -6   53.97   16.91
  -1   4  13   73.52   17.20
   1  -4 -13   73.40   13.13
  -1   4  13   71.97   14.28
   1  -4 -13   79.08   13.35
   3   2  15  559.73   25.85
  -3  -2 -15  540.90   26.67
  -3  -2 -15  593.99   24.68
   3   2  15  508.42   21.83
   4   9   7   69.63   25.60
  -4  -9  -7   47.01   27.44
  -4  -9  -7   37.97   17.52
   1  -7  11    3.17    8.27
   1  -7  11   -1.10    7.55
  -1   7 -11    0.79    9.57
  -1   7 -11    2.93    3.96
  -6  -4   7 1012.93   35.81
   6   4  -7  995.99   39.28
   6   4  -7  800.88   30.22
  -3   4 -13   82.23   11.07
   3  -4  13  101.40    8.97
   3  -4  13   98.22   19.99
  -3   4 -13   94.03   17.81
   4   5  13  338.50   21.46
  -4  -5 -13  368.58   17.05
   4   5  13  304.80   16.64
  -4  -5 -13  367.88   37.27
  -1   8  -9   13.99    9.72
  -1   8  -9   16.00    9.79
   1  -8   9   18.10   16.14
  -2  -5  13   38.51   19.29
   2   5 -13   51.03   27.13
  -2  -5  13   50.59   24.99
   2   5 -13   32.38   10.27
  -1 -10   4   24.75   11.21
  -1 -10   4   35.42   14.65
   1  10  -4   24.58   11.01
  -4   4   8    1.35    4.75
  -4   4   8    7.63    8.30
   4  -4  -8   10.08   11.68
   7   0   6   16.45   11.52
  -7   0  -6   21.61    5.52
   7   0   6   18.42    9.57
   1   8 -10   17.08   12.02
  -1  -8  10   15.62    7.68
  -5  -9  -5    5.99    8.65
  -5  -9  -5    1.30   12.70
   5   9   5   16.31    9.48
   5   8   8  168.62   26.13
  -5  -8  -8  176.12   21.16
   5   8   8  175.29   14.22
   7   2  -3  182.16   29.26
  -7  -2   3  163.37   26.72
  -7  -2   3  158.93   22.97
   3  -2 -12   77.53   30.86
  -3   2  12   76.31   33.48
   3  -2 -12   72.40   10.65
   0  -9  -6  182.63   32.13
   0   9   6  168.86    7.84
   0   9   6  203.12   23.85
   0  -9  -6  198.96   14.18
  -4 -10  -2  159.72   12.64
  -4 -10  -2  207.51   42.35
   4  10   2  223.44   20.40
   5   3  13 1767.76   66.13
  -5  -3 -13 2219.25   73.82
   5   3  13 1923.56   58.89
  -5  -3 -13 2329.65   71.04
   7   4  -3  472.57   30.61
  -7  -4   3  449.38   27.49
  -7  -4   3  417.78   18.97
  -7  -4   3  339.18   28.38
   3   3 -13   65.33    7.39
   3   3 -13   69.53   20.02
  -3  -3  13   69.24   11.93
  -3  -3  13   76.09   44.02
   2   8  10  197.44   13.62
  -2  -8 -10  191.61   37.35
   4  -5  10  117.05   13.56
   4  -5  10  116.04   12.32
   4  -5  10  123.34    7.44
  -4   5 -10  118.79   20.70
   7   0  -1  918.13   28.34
  -7   0   1  934.02   36.28
   7   0  -1 1138.48   39.97
  -7   0   1  924.22   29.85
  -6   2   4   54.70   11.79
   6  -2  -4   61.21   26.02
  -6   2   4   54.08   18.21
   0   5  13    9.44    7.09
   0  -5 -13    7.14    6.19
   0   5  13   10.10    6.04
   0  -5 -13   18.30   10.74
  -3  -9   7  323.15   20.03
   3   9  -7  277.67   16.96
   3   9  -7  308.40   28.80
   5   5  12  704.24   32.85
   5   5  12  707.28   26.43
  -5  -5 -12  764.83   32.96
  -5  -5 -12  792.87   28.00
  -2  -3 -15   10.64    9.03
   2   3  15    8.54    8.24
   2   3  15    3.73    6.87
  -2  -3 -15    5.61    6.92
  -2   7 -10  105.28   10.21
  -2   7 -10   94.14   34.05
   2  -7  10   64.22   18.85
  -2   7 -10   85.52   13.56
  -4  -7 -11  701.06   30.41
   4   7  11  670.33   27.91
   4   7  11  687.26   42.88
  -3  -8   9  346.49   20.10
   3   8  -9  326.16   20.09
  -3  -8   9  301.21   24.44
   2  -5  13  395.09   19.96
  -2   5 -13  415.11   29.92
  -2   5 -13  388.91   19.88
   2  -5  13  391.70   38.31
   5  -4   9  191.21   12.09
  -5   4  -9  182.05   26.27
   5  -4   9  179.29   11.47
   5  -4   9  176.09   12.12
   6   8   5   13.94    7.51
   6   8   5    5.64    7.27
  -6  -8  -5    7.97    7.58
  -1  -1  15 1388.62   47.63
  -1  -1  15 1406.84   46.19
   1   1 -15 1120.28   36.95
   1   1 -15 1399.62   47.47
   0  10  -1  251.70   21.03
   0 -10   1  260.34   32.81
   0 -10   1  270.72   28.04
   0  10  -1  277.24   16.61
  -2  -3  14   52.33   19.95
   2   3 -14   55.20   24.94
   2   3 -14   38.01    9.64
  -2  -3  14   51.82   12.56
  -3  -8 -10  270.77   38.72
   3   8  10  290.36   19.23
   3   8  10  293.15   33.95
   0  -2 -15  115.81   20.34
   0   2  15  140.22   13.02
   0   2  15  139.60   12.56
   0  -2 -15  144.13   12.68
   4  -1  14 1543.12   47.35
  -4   1 -14 1739.20   57.62
   4  -1  14 1699.14   59.97
  -4   1 -14 1672.56   61.87
  -3   7  -8  572.98   26.84
  -3   7  -8  603.52   26.12
   3  -7   8  583.09   26.58
   3  -7   8  589.25   31.82
  -3   5   9    2.02    4.36
  -3   5   9    4.98    5.10
   3  -5  -9    4.55    4.42
   3  -5  -9   -1.85   11.59
   4  10  -1   19.30    5.38
  -4 -10   1   27.09   13.65
  -4 -10   1   17.47    8.92
   4  10  -1   33.30   11.62
   7   3   8   89.27   11.27
  -7  -3  -8  117.43   25.52
  -7  -3  -8  113.83   15.79
   0  10   0  124.80   22.08
   0  10   0  109.18   17.44
   0 -10   0  107.90   24.26
   0 -10   0   91.53   27.29
  -6   1 -10 2448.01   77.92
  -6   1 -10 2555.13   81.13
   6  -1  10 2395.98   74.69
   1  -3  15   73.74   14.09
   1  -3  15   60.95   21.32
  -1   3 -15   50.11   20.10
  -1   3 -15   82.35   20.25
   6   1  -7  451.75   22.37
  -6  -1   7  552.89   25.19
   6   1  -7  575.68   46.76
   1  -9   6  225.86    9.18
  -1   9  -6  226.27   18.39
   1  -9   6  207.55   16.36
  -1   9  -6  212.51   15.74
   0   3 -15  284.22   38.08
   0  -3  15  257.90   16.86
   0   3 -15  217.21   19.36
   0  -3  15  280.16   30.24
  -7  -2  -8 1265.16   61.51
   7   2   8 1178.42   40.44
  -7  -2  -8 1227.44   40.75
  -5   5   2   11.94   11.60
   5  -5  -2    3.76    4.15
   5  -5  -2    5.00   12.30
  -5   5   2    1.53    6.09
  -7  -6  -5  122.08   10.02
   7   6   5  100.85   25.77
   7   6   5  131.92   13.38
  -7  -6  -5  140.53   19.55
  -3   0  13   35.03    6.76
   3   0 -13   31.31   11.84
  -3   0  13   52.36   16.12
   3   0 -13   27.17   16.91
   1   9  -8   41.14   16.15
   1   9  -8   34.34    9.74
  -1  -9   8   28.92   35.33
  -5  -9   3  398.41   23.04
   5   9  -3  437.96   26.51
   5   9  -3  295.10   15.08
   3  -8   2   96.48   13.75
  -3   8  -2   69.18   27.42
   3  -8   2   85.27   32.10
  -3   8  -2   91.71   16.52
   6   8  -2  974.60   37.51
  -6  -8   2  798.49   17.40
   6   8  -2  692.11   26.43
  -6  -8   2  901.79   29.01
   5   0  13   26.66    7.26
  -5   0 -13   35.33   18.33
  -5   0 -13   45.98   11.46
   5   0  13   49.09   18.68
   2  -4  14  955.36   37.88
  -2   4 -14  960.53   37.84
  -2   4 -14  873.34   20.41
   2  -4  14  902.92   17.93
   4  -6  -4  403.09   30.63
  -4   6   4  332.50   20.39
   4  -6  -4  317.84   15.98
  -4   6   4  347.24   41.26
   0 -10   2  928.93   36.80
   0 -10   2 1007.08   33.43
   0  10  -2 1068.56   40.26
   0  10  -2  963.41   33.88
  -3   8  -1  123.33   18.96
  -3   8  -1  129.49   12.50
   3  -8   1  121.09   10.60
   3  -8   1  133.75   13.29
  -1   9   4  538.64   21.62
  -1   9   4  513.00   31.05
   1  -9  -4  495.98   23.22
   1  -9  -4  509.79   35.15
   2   9   8   28.99   14.00
   1   0 -15  201.65   12.63
  -1   0  15  183.81   14.28
   1   0 -15  163.83   12.69
  -1   0  15  196.59   16.17
  -3   5 -12  341.83   48.22
  -3   5 -12  333.41   20.36
   3  -5  12  320.91   22.31
   3  -5  12  339.91   17.44
   4  -1 -11   22.34    8.01
   4  -1 -11    7.25    8.46
  -4   1  11   16.64   11.94
  -3  -9  -8 2322.34   73.72
   3   9   8 2534.92   79.54
  -3  -9  -8 2134.98   66.37
   3  -1  15   48.10   15.76
  -3   1 -15   36.26    9.22
   3  -1  15   29.03    7.87
  -3   1 -15   33.35   12.53
   0   6  12  197.89   16.89
   0   6  12  206.01   30.10
   0  -6 -12  212.85   23.28
   0   6  12  188.81    9.36
   3  -3  14   -4.11   11.29
  -3   3 -14    1.74    4.80
  -3   3 -14    4.05    5.41
   3  -3  14    2.29    5.44
  -6   3   2 1225.39   41.50
   6  -3  -2 1249.55   37.95
   6  -3  -2 1425.94   48.65
  -6   3   2 1176.18   49.66
   1   3  15   63.04   10.02
  -1  -3 -15   65.66   13.59
   1   3  15   63.90    9.77
  -1  -3 -15   66.49   19.19
  -5  -7 -10  264.24   38.50
   5   7  10  212.88   15.83
   5   7  10  241.85   14.04
  -7  -6   1    6.60    8.38
  -7  -6   1    5.97    5.60
  -7  -6   1    4.77    5.14
  -7  -6   1    3.75    6.32
   0  -8  10  277.53   32.01
   0   8 -10  278.68   26.71
   0   8 -10  278.01   29.03
  -4  -5  11  304.61   17.30
  -4  -5  11  314.32   21.95
   4   5 -11  272.79   17.36
   4   5 -11  324.39   14.73
   6   4  11   14.26    7.65
   6   4  11   18.56    3.93
  -6  -4 -11   20.65   15.30
  -6  -4 -11   20.52    6.63
  -7   1  -3  395.45   22.50
   7  -1   3  405.05   26.47
   7  -1   3  451.66   25.68
  -1   6  11  982.54   33.26
   1  -6 -11  971.45   34.17
  -1   6  11  908.97   35.73
   1  -6 -11 1021.71   37.68
  -4 -10  -3   71.36   38.25
   4  10   3   76.55   21.05
  -4 -10  -3   64.31   14.76
   2  -4 -12    3.92    2.51
   2  -4 -12    0.70    5.73
   2  -4 -12    5.49    6.94
  -2   4  12    8.58   11.76
  -3   8  -3  593.95   22.54
   3  -8   3  531.39   24.11
   3  -8   3  590.73   18.03
  -3   8  -3  526.44   25.00
  -2   8   5  492.41   15.09
   2  -8  -5  448.69   22.13
  -2   8   5  552.26   36.37
   2  -8  -5  509.55   39.73
   7  -1   2   81.06   29.65
   7  -1   2   64.88   10.58
  -7   1  -2   75.68   34.07
   1   2 -15  807.33   28.25
  -1  -2  15 1060.51   38.97
   1   2 -15 1061.08   39.14
  -1  -2  15 1041.12   35.56
   0  10   1 1254.93   40.68
   0  10   1 1371.88   48.57
   0 -10  -1 1184.44   40.95
   0 -10  -1 1279.95   42.83
  -5  -2  10   29.12   13.33
   5   2 -10   31.65   20.70
   5   2 -10   29.96   12.75
  -7  -5  -7   30.53   13.86
  -7  -5  -7   15.90   10.42
   7   5   7   19.13    7.49
   7   5   7   17.07   11.28
   3  10  -4   18.19   17.34
   3  10  -4   16.97    9.28
  -3 -10   4   31.36   12.05
  -5   4   5   16.45   13.69
  -5   4   5   23.96    9.11
   5  -4  -5   13.88   11.17
   3  -7  -5  201.64   23.19
   3  -7  -5  193.45    9.34
  -3   7   5  190.69   18.87
  -3   7   5  238.40   14.21
  -2  -9   8  824.19   34.36
   2   9  -8  827.67   36.77
   2   9  -8  799.50   33.17
   4  -6   8  478.20   30.99
  -4   6  -8  472.05   26.10
  -4   6  -8  424.00   25.42
   4  -6   8  442.74   24.93
  -5  -3  10   88.53   35.41
   5   3 -10   86.26   13.70
   5   3 -10   86.15   15.27
   6  -2   9  668.39   28.93
   6  -2   9  655.99   28.44
  -6   2  -9  682.92   30.36
   6  -3   7    6.52    6.30
  -6   3  -7    4.42   10.42
   6  -3   7   -0.16    9.71
   0   4  14  266.61   22.57
   0   4  14  255.71   17.94
   0  -4 -14  245.56   16.22
   0  -4 -14  251.53   27.79
  -3   8   0  201.38   16.49
  -3   8   0  211.43   13.91
   3  -8   0  223.18   13.54
   3  -8   0  175.03   18.14
   6   7   8  158.37    9.36
  -6  -7  -8  166.49   11.67
   6   7   8  151.48   14.83
  -6  -6   6  632.88   26.50
  -6  -6   6  615.29   23.04
   6   6  -6  494.99   23.71
   6   6  -6  680.18   24.53
  -5   2   8   64.83   15.60
  -5   2   8   63.34    9.88
   5  -2  -8   75.96   34.07
   7  -1   4  102.64   40.80
   7  -1   4   90.90   17.11
  -7   1  -4   92.03   10.66
  -2  -6 -13  185.95   45.83
  -2  -6 -13  184.12   14.10
   2   6  13  216.42   14.51
   2   6  13  198.08   22.12
  -2  -8  10   -5.01    9.53
   2   8 -10    6.79   11.35
  -2  -8  10    6.83    9.24
  -6   0 -11  445.65   24.32
   6   0  11  427.27   22.92
  -6   0 -11  444.47   26.43
   0  -6  13  866.29   35.19
   0   6 -13  727.67   28.85
   0   6 -13  879.95   38.97
   0  -6  13  816.12   32.61
   1  10   4  114.77   17.65
  -1 -10  -4  121.92   21.13
  -1 -10  -4  108.26   11.92
   1  10   4   99.75    6.06
  -7  -4  -8  934.28   35.20
   7   4   8  803.83   19.15
  -7  -4  -8  890.14   30.98
  -2   5  11  230.53   19.46
   2  -5 -11  224.86   15.39
  -2   5  11  224.07   17.16
   2  -5 -11  205.94   10.16
   4  10  -2  165.11    7.99
   4  10  -2  230.92   17.36
  -4 -10   2  211.23   15.63
   2  -1 -14  352.83   25.27
  -2   1  14  383.27   25.43
   2  -1 -14  309.89   17.79
  -2   1  14  352.77   17.30
   0  10  -3  507.08   25.33
   0 -10   3  542.01   24.38
   0 -10   3  478.43   27.45
   0  10  -3  547.63   29.10
   2  10  -5   14.51    8.53
   2  10  -5   11.83   13.75
  -2 -10   5    8.08   15.72
   5   8  -6  294.16   16.93
  -5  -8   6  338.83   26.63
  -5  -8   6  391.68   34.85
   7  -1   1    9.47   10.26
   7  -1   1    4.82    3.52
  -7   1  -1    5.43   12.75
  -7   1  -1    5.99    4.36
  -4   7  -2  204.27   34.63
   4  -7   2  242.45   13.44
   4  -7   2  216.43   15.39
  -4   7  -2  216.30   21.38
  -4  -8   8   96.31   39.80
  -4  -8   8   70.43   14.52
   4   8  -8   69.59   25.12
   2  10   5  365.88   26.75
  -2 -10  -5  348.50   38.06
  -2 -10  -5  350.61   19.78
  -5   2 -12    6.95    8.66
  -5   2 -12    2.89    9.35
   5  -2  12   -4.00    9.73
   2  -6  12 2040.50   69.66
   2  -6  12 1989.59   66.07
  -2   6 -12 1984.82   70.02
  -2   6 -12 1945.28   59.80
   4   9  -6  119.63   21.63
  -4  -9   6  120.04   12.56
   4   9  -6  105.52   10.34
  -1   3  14   32.19   17.07
   1  -3 -14   38.37   10.91
   1  -3 -14   28.34    9.66
  -1   3  14   36.86   14.95
  -7  -1   3    1.26    9.80
  -7  -1   3    0.03    6.13
   7   1  -3    0.31    7.82
  -3 -10  -5 1403.42   52.08
  -3 -10  -5 1387.41   45.84
   3  10   5 1639.60   64.57
   0  -8  -9   -0.12    3.69
   0   8   9    1.95   11.61
   0  -8  -9    4.44   10.16
   0   8   9    3.27    3.99
  -4   7  -1  100.73   15.36
   4  -7   1   96.65   15.14
  -4   7  -1   82.11   10.45
   4  -7   1  118.63   26.87
  -4   7  -3  323.34   22.70
  -4   7  -3  298.46   19.51
   4  -7   3  302.76   20.87
   4  -7   3  334.22   21.13
   4   2 -12  166.95   16.92
  -4  -2  12  219.99   50.19
   4   2 -12  171.69   11.36
  -7  -1  -8  539.79   15.82
   7   1   8  544.18   24.50
  -7  -1  -8  582.57   29.96
  -2  -5 -14 1222.00   38.46
  -2  -5 -14 1151.44   41.69
   2   5  14 1231.38   44.53
   2   5  14 1238.51   42.80
   3  -8   4  293.95   27.36
  -3   8  -4  275.36   19.14
   3  -8   4  286.08   32.66
  -3   8  -4  289.81   17.47
  -5   3 -11   65.01   22.55
  -5   3 -11   65.82   26.49
   5  -3  11   67.28   27.81
   0  -5  14 1058.67   37.41
   0   5 -14  885.33   30.74
   0   5 -14 1096.42   69.08
   0  -5  14 1085.22   43.43
   7   0   7  248.84   16.61
  -7   0  -7  264.96   16.72
   7   0   7  250.27   28.52
   7   5  -3  175.47   11.87
  -7  -5   3  144.30    6.85
  -7  -5   3  168.60   24.68
  -7  -5   3  127.65   20.41
  -3  -3 -15  177.05   19.49
   3   3  15  195.19   23.99
  -3  -3 -15  191.75   11.12
   3   3  15  185.26   11.48
  -5   5  -7  175.07    7.84
   5  -5   7  191.21   15.11
   5  -5   7  205.43   12.63
  -5   5  -7  190.90   21.77
   1  10  -5  189.45   11.58
   1  10  -5  209.46   38.13
  -1 -10   5  171.87   15.75
   5  -1  -9  589.76   28.14
   5  -1  -9  551.06   26.72
  -5   1   9  600.77   27.35
   3   6  13  139.65   36.42
  -3  -6 -13  127.58    5.55
   3   6  13  141.21   10.70
  -3  -6 -13  157.76   17.72
  -5  -1  10    6.56    5.42
   5   1 -10    5.86    9.10
   5   1 -10   -0.87    6.73
  -1  -6  13  415.85   22.24
   1   6 -13  429.56   26.46
  -1  -6  13  410.28   21.77
   2  -3 -13 2617.96   81.84
  -2   3  13 2315.30   72.07
  -2   3  13 2752.45   38.48
   2  -3 -13 2627.15   32.52
  -6  -5   7  538.89    9.24
   6   5  -7  543.03   27.70
   6   5  -7  418.39   20.51
  -6  -5   7  558.30   24.82
  -4   3 -13 1065.34   37.14
   4  -3  13 1083.19   41.89
   4  -3  13  987.98   31.66
  -4   3 -13 1108.97   40.53
  -2   8  -8  171.30   15.75
   2  -8   8  155.58   23.13
   2  -8   8  160.39   25.65
  -2   8  -8  161.48   14.42
  -2   9  -1  111.07   14.20
  -2   9  -1   99.56   18.48
   2  -9   1  103.32   30.50
   2  -9   1  107.51   14.84
  -4  -4 -14   26.94   17.31
   4   4  14   28.90    6.80
  -4  -4 -14   33.80   13.71
   4   4  14   41.13   16.47
   0 -10  -2  500.07   23.94
   0  10   2  517.26   21.21
   0 -10  -2  549.68   26.46
   0  10   2  571.32   28.58
  -7   0   2  963.75   36.36
  -7   0   2  880.75   55.78
   7   0  -2 1153.63   42.62
  -5  -9  -6  264.28   43.08
   5   9   6  288.31   18.36
  -5  -9  -6  264.47   22.00
   2  -9   2  451.15   31.30
  -2   9  -2  406.86   22.80
  -2   9  -2  450.24   33.10
   2  -9   2  377.14   20.72
   6   8   6  608.39   24.66
   6   8   6  490.14   22.86
  -6  -8  -6  598.73   25.88
  -7  -6  -6  514.86   33.59
   7   6   6  545.07   26.56
  -7  -6  -6  504.47   22.03
   7   6   6  413.39   22.94
  -1  -8 -10   99.13   15.36
   1   8  10   93.64    6.71
   1   8  10  104.40   39.34
  -1  -8 -10   97.49   10.87
   5   4  13 2509.83   80.60
  -5  -4 -13 2681.45   79.77
  -5  -4 -13 2207.74   72.53
   5   4  13 2293.01   69.93
   5  -3  -7  686.52   31.36
  -5   3   7  692.85   29.37
  -5   3   7  631.26   39.56
   7  -1   5  127.91   43.38
   7  -1   5   89.85   23.14
  -7   1  -5   97.25   15.48
  -3  -4  13  133.71   18.25
   3   4 -13  103.21   15.38
   3   4 -13   93.30   10.25
  -3  -4  13  116.05   13.98
  -4 -10  -4   49.81   24.44
  -4 -10  -4   39.86   14.58
   4  10   4   64.93   24.79
   0   9  -8  550.14   37.35
   0   9  -8  520.01   28.08
   0  -9   8  538.06   30.88
  -7  -3   4 1653.39   54.97
   7   3  -4 1742.73   68.30
  -7  -3   4 1288.88   56.52
   6   7  -5  611.88   24.77
  -6  -7   5  816.37   30.35
  -6  -7   5  863.12   33.37
  -6  -7   5  857.50   29.88
   3  -8  -1  110.47   10.88
   3  -8  -1   83.99   21.51
  -3   8   1  100.71   12.83
  -3   8   1   95.06   20.30
   1  -1 -15   11.40   11.30
  -1   1  15    5.89    4.44
  -1   1  15    7.21   10.29
   1  -1 -15   17.28    9.40
  -4   4 -12  115.94   11.52
   4  -4  12   99.06   15.87
   4  -4  12  104.88   11.72
  -4   4 -12  116.91   17.39
   4   3 -12  660.23   27.80
  -4  -3  12  731.29   34.35
  -4  -3  12  681.77   24.67
   4   3 -12  618.46   33.94
  -4  -1  12  566.51   38.71
   4   1 -12  499.14   24.32
   4   1 -12  496.82   24.69
  -2   7   8  845.05   24.40
   2  -7  -8  801.74   35.83
  -2   7   8  791.24   30.34
   2  -7  -8  744.33   29.89
  -6   1   6   90.00   38.90
   6  -1  -6   86.71   22.31
  -6   1   6   81.45   30.27
   2   7  12  576.93   28.27
   2   7  12  653.70   30.98
  -2  -7 -12  556.65   30.00
  -4   7   0  786.03   32.62
   4  -7   0  894.45   35.80
   4  -7   0  778.76   30.23
  -4   7   0  868.77   42.94
   5   4 -10   42.17   11.28
  -5  -4  10   50.08   16.68
   5   4 -10   39.65   15.72
   2  -9   0  855.69   31.87
  -2   9   0  959.48   35.05
  -2   9   0  886.92   32.40
   2  -9   0  930.92   33.48
  -4   7  -4  638.56   28.41
  -4   7  -4  699.76   28.32
   4  -7   4  664.08   31.40
   4  -7   4  697.67   36.88
  -7   1   0   30.59   15.89
   7  -1   0   23.29    7.47
   7  -1   0   48.07   12.52
  -7   1   0   25.20   10.49
  -6  -8   3  101.73   12.22
   6   8  -3   75.04   11.75
  -6  -8   3   95.73   19.30
  -7  -6   2   24.20   11.99
  -7  -6   2   31.30   14.87
  -7  -6   2   29.34   10.48
  -7  -6   2   29.19    9.23
   1   7 -12  187.12   15.84
  -1  -7  12  184.31   13.86
  -1  -7  12  182.33   14.28
   2  -3  15  227.04   36.15
  -2   3 -15  237.40   19.71
   2  -3  15  227.21   27.04
  -2   3 -15  212.84   25.86
   2  -9   3  706.14   28.83
   2  -9   3  629.46   27.96
  -2   9  -3  716.55   30.05
  -2   9  -3  627.93   27.46
   0   7 -12  975.41   35.42
   0  -7  12 1004.65   36.72
   0  -7  12  979.38   48.47
   3   5  14  638.81   26.59
   3   5  14  651.48   28.45
  -3  -5 -14  634.36   28.83
  -3  -5 -14  595.94   22.14
  -1   0 -16  851.89   19.49
   1   0  16  789.17   35.96
   1   0  16  852.54   20.32
  -1   0 -16  730.82   32.24
   3   7  12    8.08   10.39
  -3  -7 -12    3.75    8.30
   3   7  12   10.42    5.56
  -4  -8 -10 1114.86   38.97
   4   8  10 1034.19   46.96
   4   8  10 1142.53   40.86
   7   7   2   84.78   10.45
  -7  -7  -2   87.99   16.26
  -7  -7  -2   76.27   14.95
  -7  -7  -2   98.77   12.39
   5   9  -4 1399.71   46.80
   5   9  -4 2037.70   65.22
  -5  -9   4 1792.83   57.60
   0 -10   4   39.65   14.42
   0  10  -4   51.68   19.64
   0 -10   4   53.05    5.61
   0  10  -4   47.57   13.11
  -5   5   3  186.64   22.12
  -5   5   3  175.85   13.02
   5  -5  -3  200.57   18.33
   5  -5  -3  154.05   13.52
   4  -5  -7  334.07   16.02
  -4   5   7  396.14   24.50
  -4   5   7  341.51   31.64
   4  -5  -7  354.23   22.35
   7   2  -4 1807.88   59.16
  -7  -2   4 1665.18   54.88
  -7  -2   4 1304.73   44.53
  -7  -4   4  257.97   19.00
   7   4  -4  336.88   18.13
  -7  -4   4  337.71   19.62
  -1  -3  15   27.40   12.11
   1   3 -15    9.81    7.13
  -1  -3  15   13.07    6.34
   1   3 -15    9.97   10.85
   2   4 -14   23.24   10.77
  -2  -4  14   25.94   12.59
   2   4 -14   15.13    5.35
  -2  -4  14   23.80   14.45
  -1   5 -14  121.52    9.61
   1  -5  14  154.78   13.03
   1  -5  14  145.61   12.13
  -1   5 -14  139.10   16.85
   0   7  11  103.09   17.29
   0  -7 -11   92.66   15.66
   0   7  11   93.55    8.74
   0  -7 -11  105.11   20.65
   1   9   8  721.16   63.98
  -1  -9  -8  767.26   20.74
  -1  -9  -8  699.57   29.74
   6  -4   2  572.07   23.19
   6  -4   2  670.64   30.59
  -6   4  -2  531.69   30.56
  -6   4  -2  540.84   26.11
   6  -4   3    1.83   12.46
  -6   4  -3    2.97    3.28
  -6   4  -3   10.43   11.79
   6  -4   3    1.77    3.20
   4  10  -3   23.99    9.71
   4  10  -3   41.88   14.76
  -4 -10   3   31.08    9.76
  -6   0   7   85.86   15.13
   6   0  -7   92.96   24.93
  -6   0   7   99.11   10.79
   3  -1 -13  175.26   14.60
  -3   1  13  210.96   21.39
   3  -1 -13  168.32   11.96
  -7  -7  -3  229.51   20.02
   7   7   3  217.42   22.37
  -7  -7  -3  208.56    8.47
   7   7   3  168.66   17.99
   1   6  13 1301.82   46.83
   1   6  13 1183.78   45.29
  -1  -6 -13 1199.19   37.70
  -1  -6 -13 1096.98   40.00
  -5   1 -13    7.35    5.37
   5  -1  13    1.59    9.78
  -5   1 -13    3.61    4.63
  -7  -7  -1    5.15    4.50
  -7  -7  -1    9.20    9.68
  -7  -7  -1    1.14    3.59
  -1  -5  14  490.36   38.80
  -1  -5  14  510.73   25.98
   1   5 -14  340.94   15.63
   1   5 -14  502.49   32.71
   1  -6  13  547.79   29.09
   1  -6  13  550.00   26.44
  -1   6 -13  583.94   28.42
  -1   6 -13  540.00   23.98
  -4  -9  -8  521.93   49.70
   4   9   8  553.87   25.05
  -4  -9  -8  491.83   24.69
   1  -9   7   63.05    7.18
  -1   9  -7   54.96   28.12
  -1   9  -7   53.05   25.18
   1  -9   7   57.77   24.20
  -6   3   3  540.98   26.53
  -6   3   3  552.43   24.11
   6  -3  -3  654.10   30.11
  -3   8  -5  130.12   13.57
  -3   8  -5  130.48   21.42
   3  -8   5  122.94   11.37
   3  -8   5  151.53   12.02
  -1  -5 -14  364.70   21.66
  -1  -5 -14  398.21   19.46
   1   5  14  414.91   22.56
   1   5  14  416.92   22.88
   1  -1  16  524.09   26.17
  -1   1 -16  534.02   28.09
   1  -1  16  479.80   25.25
  -1   1 -16  441.41   23.65
   3  -6  11  390.05   27.25
  -3   6 -11  393.32   24.64
  -3   6 -11  393.09   20.18
   3  -6  11  400.15   20.58
   6   6  10  108.94    8.24
   6   6  10   81.65   12.54
  -6  -6 -10  102.97   15.87
   5   6  -9  212.40   12.12
  -5  -6   9  257.06   17.75
  -5  -6   9  255.21    9.05
   1  -9  -5  210.58   13.63
  -1   9   5  226.32   10.38
  -1   9   5  235.07   30.69
   1  -9  -5  234.81   13.99
   2   0  16  510.77   26.31
   2   0  16  535.85   22.64
  -2   0 -16  504.23   23.22
  -2   0 -16  536.55   26.93
   7   3   9  125.74   19.12
  -7  -3  -9  153.40   11.70
  -7  -3  -9  152.79   26.02
   3  10  -5  239.49   23.12
   3  10  -5  192.03   10.24
  -3 -10   5  213.24   15.91
  -3   2 -15    5.06    7.16
   3  -2  15    2.44    5.55
  -3   2 -15   11.14    7.52
   3  -2  15    5.20    6.47
   6   2  12  586.25   39.45
  -6  -2 -12  599.51   27.94
  -6  -2 -12  616.25   25.42
   2  -9  -1  929.80   33.53
  -2   9   1  888.07   31.84
  -2   9   1 1029.74   38.00
   2  -9  -1  872.69   31.73
  -6   4  -1 1311.53   55.06
  -6   4  -1 1375.82   42.91
   6  -4   1 1556.59   53.68
   6  -4   1 1372.26   43.19
  -1  -1 -16 2167.69   68.83
  -1  -1 -16 1865.38   65.15
   1   1  16 2027.75   65.06
   1   1  16 2170.49   68.43
  -5  -7   8  626.73   25.31
   5   7  -8  523.89   23.73
  -5  -7   8  652.64   29.90
  -6   2   5   55.63   20.09
  -6   2   5   48.55   14.42
   6  -2  -5   61.19   26.48
   6  -4   4  384.54   35.25
  -6   4  -4  355.84   18.20
  -6   4  -4  344.47   23.59
   6  -4   4  337.54   19.51
  -4   2 -14 1801.13   61.59
   4  -2  14 1689.63   53.03
  -4   2 -14 1820.95   59.19
   4  -2  14 1877.57   63.07
   7   2   9   42.65   18.11
  -7  -2  -9   60.64   14.67
  -7  -2  -9   51.56   16.45
   2  -6 -10    3.28    3.80
  -2   6  10    4.46   12.23
   2  -6 -10   -3.78   10.80
  -2   6  10    3.43    8.47
   6   3  -8 1175.03   40.44
   6   3  -8  953.30   34.84
  -6  -3   8 1183.03   41.11
  -5  -8  -9   25.38    9.41
   5   8   9   19.19   17.36
   5   8   9   36.81   15.82
   0   9   7    5.20    5.76
   0  -9  -7    6.78    5.95
   0  -9  -7    5.82    7.57
   0   9   7    8.09   10.18
   3   7 -11  101.03   18.00
  -3  -7  11  108.31   20.67
  -3  -7  11  114.27   21.39
   2   1  16   86.30   14.00
  -2  -1 -16   87.95   15.37
   2   1  16   85.41   19.53
  -2  -1 -16   87.31   13.71
   7   5   8  376.56   25.51
  -7  -5  -8  434.09   19.82
  -7  -5  -8  445.92   24.71
   3  -6  -8  367.10   23.59
   3  -6  -8  301.47   16.29
  -3   6   8  372.08   21.79
  -3   6   8  365.16   22.71
  -7   1  -6   76.49   10.77
   7  -1   6   71.92   12.41
   7  -1   6   91.79   43.37
   6   5  11    2.95    1.92
  -6  -5 -11    6.68    8.20
  -6  -5 -11    2.31    4.77
   6   5  11    9.88    7.02
   6  -3   8  736.74   46.60
   6  -3   8  751.18   53.70
  -6   3  -8  704.02   36.46
   0  10   3   20.58   14.80
   0 -10  -3    5.11    6.73
   0 -10  -3   24.40    9.91
   0  10   3    6.40    3.83
  -4   7   1  651.06   28.67
  -4   7   1  699.15   36.12
   4  -7  -1  622.94   30.23
   4  -7  -1  688.54   29.37
   2  -9   4   99.50   10.47
   2  -9   4   89.25   20.34
  -2   9  -4  104.65   16.76
  -2   9  -4   99.62   11.56
   1  -8  -8 1528.95   53.30
   1  -8  -8 1411.91   49.73
  -1   8   8 1667.62   69.58
  -1   8   8 1449.88   47.55
   3  -7   9  579.87   30.04
  -3   7  -9  589.79   16.74
   3  -7   9  592.24   29.62
  -3   7  -9  572.53   27.86
  -4   6   5  282.14   32.63
   4  -6  -5  278.55   14.30
  -4   6   5  326.77   20.72
   4  -6  -5  317.51   30.39
  -3  -6  12   21.98   17.39
  -3  -6  12    5.34    7.17
   3   6 -12   10.15    9.11
   4  -7   5   58.72   11.60
  -4   7  -5   46.91   15.68
  -4   7  -5   44.69   15.83
   4  -7   5   49.01   10.67
   6   2  -8  709.70   34.96
  -6  -2   8  859.06   32.41
   6   2  -8  851.16   32.07
   7   7   4   20.53    8.90
  -7  -7  -4   18.53    8.72
   7   7   4   25.48   10.30
  -7  -7  -4   22.31   10.90
   0   3  15  103.89   11.07
   0  -3 -15  102.88   18.92
   0   3  15  102.71   19.10
   0  -3 -15  112.60   14.16
   1  10   5  323.77   27.50
   1  10   5  301.74   14.38
  -1 -10  -5  313.91   26.47
  -1 -10  -5  309.75   35.14
  -1   7  10  123.26    9.81
   1  -7 -10  136.10   10.37
   1  -7 -10  157.72   33.42
  -1   7  10  162.90   35.13
  -7  -7   0   27.01   14.52
  -7  -7   0   32.90   13.34
  -7  -7   0   22.15   12.17
  -7  -7   0   35.96   17.17
   5  -4  10   60.07   10.91
  -5   4 -10   71.57   19.66
   5  -4  10   62.12   22.32
  -3   8   2    9.45    9.82
   3  -8  -2    8.61    8.03
  -3   8   2    7.46    6.71
   3  -8  -2   11.92    9.33
   2   4  15  240.63   16.74
   2   4  15  223.16   13.48
  -2  -4 -15  235.22   17.20
  -2  -4 -15  227.79   38.65
  -6  -3 -12  242.85   17.27
  -6  -3 -12  241.33   12.56
   6   3  12  223.24   16.98
  -4  -1 -15  901.86   34.82
   4   1  15  730.79   27.66
  -4  -1 -15  876.64   20.80
   4   1  15  870.53   26.04
   0   4 -15  405.33   27.65
   0  -4  15  363.35   20.71
   0   4 -15  298.24   15.46
   0  -4  15  399.98   22.42
  -3  -9   8  188.52   14.78
   3   9  -8  218.91   26.10
   3   9  -8  164.95   11.00
  -1   8 -10   28.50   10.66
  -1   8 -10   34.70   13.42
   1  -8  10   49.13   22.88
  -1   8 -10   42.21   15.35
  -4   3  10  104.17   13.78
   4  -3 -10  105.64   11.38
  -4   3  10   97.54   36.34
  -7   1   1  314.81   20.59
  -7   1   1  336.38   31.74
   7  -1  -1  376.51   22.53
  -6  -1 -12   39.76    9.40
   6   1  12   44.23   19.73
  -6  -1 -12   51.86   23.13
  -4  -4  12  107.32   47.77
   4   4 -12   86.57   14.25
   4   4 -12   79.42   13.86
  -4  -4  12   92.46   10.92
  -4 -10  -5  150.60   24.26
  -4 -10  -5  136.41   22.06
   4  10   5  162.63   13.92
   4   0 -12  504.26   27.61
   4   0 -12  504.28   23.15
  -4   0  12  550.29   33.44
   5   0 -10  117.94   26.25
  -5   0  10  124.74   15.55
   5   0 -10  130.21   11.51
   2  10  -6  791.74   36.57
   2  10  -6  918.48   40.60
  -2 -10   6  859.71   24.06
   3  10   6  116.79   18.93
  -3 -10  -6  122.52   28.95
  -3 -10  -6  109.77   11.00
  -2 -10  -6  111.05   11.41
  -2 -10  -6   98.11   25.07
   2  10   6  103.86   28.52
   7   0   8   61.92   31.28
  -7   0  -8   60.90   12.06
   7   0   8   53.05   10.00
  -2   8   6    1.71    5.02
   2  -8  -6    2.62    7.88
   2  -8  -6    1.78    5.27
  -2   8   6   -1.39   10.44
   4   2  15   94.82   16.52
  -4  -2 -15   98.18   22.48
  -4  -2 -15   90.79   13.75
   4   2  15   83.43   18.23
  -4   5 -11  148.68   25.77
   4  -5  11  155.87   12.26
   4  -5  11  166.15   20.20
  -4   5 -11  156.98   25.86
  -2   1 -16  543.61   25.98
  -2   1 -16  624.46   26.87
   2  -1  16  588.48   24.60
   2  -1  16  596.78   27.10
  -7  -6  -7  280.06   18.04
  -7  -6  -7  274.66   13.96
   7   6   7  239.11   16.06
   7   6   7  292.37   14.66
   4  -6   9    5.46    6.16
  -4   6  -9   16.22   10.12
  -4   6  -9    2.30    2.78
   4  -6   9    5.29   11.65
   6  -4   0  862.11   59.62
   6  -4   0  762.30   27.88
  -6   4   0  765.65   28.55
  -6   4   0  701.82   30.58
  -1 -10   6   16.12   12.38
   1  10  -6   22.50   11.99
   1  10  -6   33.81   16.50
  -6   1 -11  218.78   36.33
   6  -1  11  234.10   13.99
  -6   1 -11  246.83   21.53
   1  -4  15    4.28    3.21
   1  -4  15    4.33    8.68
  -1   4 -15    2.20    4.91
  -1   4 -15    5.00    7.08
   0   0  16  179.90   24.90
   0   0 -16  160.01   10.57
   0   0 -16  189.34   13.28
   0   0  16  157.72   33.24
   0   1 -16    6.18    5.84
   0  -1  16    6.41    7.32
   0  -1  16    9.77    7.52
   0   1 -16    1.99    6.04
   6   4  -8  602.53   23.33
   6   4  -8  478.92   21.82
  -6  -4   8  608.03   27.01
  -6   4  -5 1898.73   64.44
   6  -4   5 1961.44   61.56
   6  -4   5 2141.75   88.11
   3  -4 -11 1019.79   46.87
  -3   4  11 1114.19   42.73
  -3   4  11 1037.50   37.62
  -7  -4  -9 1137.52   37.86
   7   4   9 1064.26   52.01
  -7  -4  -9 1196.05   43.93
   1   7  12  159.19    8.48
  -1  -7 -12  183.63   17.38
   1   7  12  177.91   13.90
   1   7  12  170.93   21.83
  -5   5  -8  452.98   25.80
   5  -5   8  518.89   46.86
  -5   5  -8  480.11   33.15
   5  -5   8  475.89   29.42
   3  -7  -6    8.16   11.47
  -3   7   6   11.84    7.71
  -3   7   6   19.27   13.23
   3  -7  -6   17.79    6.49
   7   0  -3  614.65   26.28
  -7   0   3  526.77   22.46
  -7   0   3  467.70   24.31
   1   9  -9   77.22   11.11
  -1  -9   9   81.05   15.55
   1   9  -9   91.97   29.37
   6   8   7 1934.34   60.30
  -6  -8  -7 1862.07   59.71
   6   8   7 1573.20   56.13
   6   9   2  175.56   13.15
  -6  -9  -2  134.16   21.88
  -6  -9  -2  121.94   10.82
  -7  -1   4  823.05   38.87
   7   1  -4 1048.40   39.94
  -7  -1   4  971.40   33.77
   6   9   1  217.88   17.84
  -6  -9  -1  200.15   24.39
  -6  -9  -1  174.78   10.80
  -6  -9  -1  203.79    9.29
  -6  -7  -9  165.23   18.20
   6   7   9  125.97   13.83
   6   7   9  160.17   10.83
  -7  -5   4  119.58   21.07
   7   5  -4   83.85   25.97
  -7  -5   4  108.52    6.33
   7   5  -4  119.01   12.68
  -5  -6 -12  197.41   20.21
   5   6  12  184.32   11.15
   5   6  12  190.80   22.90
   0  10  -5  171.60   37.23
   0 -10   5  178.04   10.76
   0  10  -5  165.52   17.99
   0 -10   5  166.80   40.24
  -2   2  14 1492.63   52.50
  -2   2  14 1314.88   41.01
   2  -2 -14 1388.74   45.81
   2  -2 -14 1376.19   47.00
  -4  -7  10  130.28   12.04
  -4  -7  10  130.19   21.55
   4   7 -10  116.95   12.10
   6  -2  10 1049.12   44.14
  -6   2 -10 1055.71   38.62
  -3  -9  -9  522.53   23.11
  -3  -9  -9  579.58   36.25
   3   9   9  610.64   27.50
  -5  -9  -7  846.48   31.37
   5   9   7  937.83   18.31
   4   0  15  784.29   13.31
  -4   0 -15  897.17   21.05
   4   0  15  916.40   36.09
  -4   0 -15 1004.59   37.07
   2  -7  11 1135.42   43.27
   2  -7  11 1143.30   38.63
  -2   7 -11 1096.05   40.74
  -2   7 -11 1124.73   36.72
  -7  -1  -9   14.88    5.25
  -7  -1  -9   20.68   10.61
   7   1   9   12.70   10.58
   5  -4  -6  285.03   19.40
  -5   4   6  293.31   33.63
  -5   4   6  279.51   18.09
  -4   2  11   11.27   11.75
   4  -2 -11   12.06   13.56
   4  -2 -11   11.71   12.94
   3  -3 -12   22.91    8.66
  -3   3  12   26.19   16.78
   3  -3 -12   20.46   11.06
  -2  -9  -9  185.25   12.11
   2   9   9  233.69   17.27
  -2  -9  -9  180.09   11.44
  -5  -2 -14    2.85    6.04
   5   2  14    3.21   12.37
  -5  -2 -14    0.66    3.93
   5   2  14    4.02    2.39
  -7  -6   3    8.79   10.11
   7   6  -3    5.95    5.09
   7   6  -3    5.50    5.32
  -7  -6   3    7.39    5.40
   2  -9  -2  628.11   26.73
  -2   9   2  644.14   28.17
   2  -9  -2  542.44   25.57
  -2   9   2  563.99   23.98
   4   6  13  502.46   25.81
   4   6  13  527.11   23.43
  -4  -6 -13  558.30   34.65
   2   7 -12  266.30   40.95
  -2  -7  12  263.38   14.85
  -2  -7  12  276.13   15.45
   1  -2  16  235.84   12.89
  -1   2 -16  225.35   13.15
   1  -2  16  256.39   15.20
  -1   2 -16  243.22   14.43
   2   6 -13  568.64   26.99
  -2  -6  13  598.09   28.13
  -2  -6  13  585.29   25.80
  -4   4   9    2.81    4.41
   4  -4  -9    2.77    8.50
  -4   4   9    0.44    8.02
  -1  -8  11  629.33   27.57
   1   8 -11  606.83   26.41
  -1  -8  11  606.54   26.47
   5   1  14    2.27    7.68
  -5  -1 -14    5.28    6.22
   5   1  14    1.82    2.35
  -5  -1 -14    9.40    7.21
   2   2  16   82.29   16.73
   2   2  16   76.34   28.65
  -2  -2 -16   90.14   11.37
  -2  -2 -16   68.58    7.97
   4   6 -11   11.60    8.27
  -4  -6  11   -2.23   12.57
  -4  -6  11   10.46    7.24
   7   7   5   10.64    7.16
  -7  -7  -5   24.67    9.87
   7   7   5   22.94   10.05
  -7  -7  -5   24.43    8.24
   1   4  15   71.06   11.80
  -1  -4 -15   68.39   14.84
   1   4  15   65.37   13.61
  -1  -4 -15   59.28   16.29
  -5  -5  10  191.43   11.51
   5   5 -10  188.90   10.86
  -5  -5  10  217.82   27.35
   5   5 -10  153.60   11.64
  -5   6  -2  124.64   14.40
  -5   6  -2  114.83   12.34
   5  -6   2  117.35    9.69
   5  -6   2  148.98   14.05
   6   8  -4  491.68   20.91
  -6  -8   4  632.42   29.71
  -6  -8   4  685.02   28.54
   1  -7  12  213.75   20.54
   1  -7  12  220.36   15.34
  -1   7 -12  203.31   25.01
  -1   7 -12  213.35    8.14
   4  10  -4   26.74    7.85
  -4 -10   4   26.41    9.32
  -7  -7   1    1.83    5.75
  -7  -7   1    4.15    5.97
  -7  -7   1    2.95    7.28
  -7  -7   1    2.96    4.04
   3  -8   6   53.80   23.65
  -3   8  -6   58.63   12.84
   3  -8   6   62.50   13.21
  -3   8  -6   48.70   10.97
   6   9   3 1084.30   36.55
  -6  -9  -3  810.25   31.08
  -6  -9  -3  994.44   34.07
   3   4  15   43.91   15.81
   3   4  15   35.29   14.62
  -3  -4 -15   38.43   10.77
  -3  -4 -15   35.06   12.28
   1  -2 -15    1.24    5.84
   1  -2 -15    3.73    5.76
  -1   2  15    2.00    8.65
  -1   2  15    2.42    2.25
   6   9   0  884.36   45.56
  -6  -9   0  719.26   28.40
   6   9   0  700.08   27.65
  -6  -9   0  804.49   28.82
  -5 -10  -1  655.36   24.68
   5  10   1  805.56   33.52
  -5 -10  -1  685.25   28.92
  -3  -8  10   -0.97    7.06
  -3  -8  10    6.98   12.21
   3   8 -10    7.03   11.01
  -5   6  -3  390.30   19.76
   5  -6   3  407.77   35.77
   5  -6   3  352.72   27.88
  -5   6  -3  343.81   22.20
   2   8  11  552.89   33.11
   2   8  11  573.91   28.15
  -2  -8 -11  525.73   27.45
  -3  -8 -11   12.70   10.40
   3   8  11   20.47   11.85
   3   8  11   13.41    8.86
   6   1  -8  485.33   34.62
   6   1  -8  392.41   23.31
  -6  -1   8  438.62   22.94
   2  -9   5   34.34   11.34
  -2   9  -5   18.27   10.61
  -2   9  -5   36.14   16.02
   2  -9   5   39.37    9.89
   4   9  -7    4.78    5.58
  -4  -9   7    7.51   10.88
   4   9  -7   -2.33   10.76
   5   8  -7  178.64   12.87
  -5  -8   7  222.59   15.84
  -5  -8   7  241.73   13.70
  -1  -2 -16 1253.88   45.76
  -1  -2 -16 1056.80   53.26
   1   2  16 1205.34   45.06
   1   2  16 1252.84   45.71
  -6  -6   7  141.78   10.97
  -6  -6   7  120.98    7.06
   6   6  -7  128.52   13.78
   6   6  -7  110.58   14.39
  -5 -10  -2   58.47   24.78
  -5 -10  -2   61.10   14.05
   5  10   2   74.87   33.17
  -5  -7 -11  109.39   17.23
   5   7  11  122.83   20.81
   5   7  11  102.68   15.32
   2   9  -9    5.11    6.37
   2   9  -9    8.67    4.76
  -2  -9   9    3.49    7.03
  -4  -7 -12  130.65   20.38
   4   7  12  133.05   12.31
   4   7  12  120.84   30.79
   5  -6   1    3.58    3.31
  -5   6  -1   -4.75    8.50
   5  -6   1    3.70    6.01
  -5   6  -1    2.69    7.08
   4  -7  -2  162.31   17.49
   4  -7  -2  205.13   20.52
  -4   7   2  183.85   19.75
  -4   7   2  166.39   14.75
  -5 -10   0 1309.66   45.34
   5  10   0 1779.04   63.45
  -5 -10   0 1471.09   52.97
   4  -7   6  358.86   15.89
   4  -7   6  326.90   13.93
  -4   7  -6  328.94   28.34
  -4   7  -6  333.15   19.12
  -7   1  -7   30.96   10.12
   7  -1   7   40.80   18.37
   7  -1   7   33.36   12.67
  -6  -4 -12    4.94   11.67
   6   4  12   16.99   17.58
  -6  -4 -12   17.11    5.74
   2  -8   9   17.45    8.22
   2  -8   9   10.02    7.56
  -2   8  -9   14.94   11.76
  -2   8  -9    8.06   10.03
   5   5  13  766.47   33.99
  -5  -5 -13  829.40   28.99
  -5  -5 -13  837.03   38.45
   5   5  13  734.35   28.33
   5   9  -5 1218.70   46.52
   5   9  -5  835.16   31.40
  -5  -9   5 1041.71   38.71
   0  -1 -16  157.05   10.95
   0   1  16  163.25   13.00
   0   1  16  163.17   12.70
   0  -1 -16  142.06   12.84
  -5   5   4  652.40   31.95
   5  -5  -4  647.32   27.39
   5  -5  -4  710.87   31.76
  -5   5   4  632.68   29.00
   0   2 -16   17.19    6.25
   0   2 -16   18.56   11.62
   0  -2  16   27.02   17.53
   0  -2  16   24.22   15.69
  -3  -5  13  553.47   25.78
   3   5 -13  520.06   34.87
  -3  -5  13  553.54   28.82
  -7  -3   5  662.95   28.07
  -7  -3   5  857.24   32.99
   7   3  -5  868.99   36.91
   0   8 -11  361.48   15.29
   0  -8  11  372.59   20.41
   0  -8  11  395.89   25.67
   3  -5 -10  676.70   31.48
   3  -5 -10  640.79   23.03
  -3   5  10  723.25   29.89
  -3   5  10  738.00   33.30
  -5   6  -4  546.71   25.23
   5  -6   4  502.37   24.65
   5  -6   4  577.74   33.26
  -5   6  -4  512.34   29.28
   0 -10  -4  445.47   24.16
   0 -10  -4  432.74   26.28
   0  10   4  449.04   21.16
   0  10   4  513.78   32.15
  -3   4 -14   38.40   16.24
  -3   4 -14   25.70   11.92
   3  -4  14   28.26   12.53
   3  -4  14   18.82   12.33
   6   7  -6  219.29   17.94
  -6  -7   6  273.90   10.39
  -6  -7   6  303.87   23.01
  -6   4   1    4.44    7.31
   6  -4  -1    2.31    3.92
   6  -4  -1   -5.12   11.08
  -6   4   1    3.69    6.42
   4   3  15    2.17    5.80
   4   3  15   -1.19   10.46
  -4  -3 -15    3.89    8.61
  -4  -3 -15    4.06    4.38
   5   3  14  102.38   16.04
   5   3  14   80.30   19.67
  -5  -3 -14  110.61   40.55
  -5  -3 -14  103.81   24.06
   7  -2   3   24.77   14.64
  -7   2  -3   24.03   10.63
   7  -2   3   12.56    8.38
   3  -8  -3   -2.66    5.55
  -3   8   3   -1.82    8.13
  -3   8   3   -0.13    7.43
   3  -8  -3   -1.98    8.31
  -2  -1  15   78.25   10.98
   2   1 -15   74.12   13.76
  -2  -1  15   74.27   27.30
   2   1 -15   71.59    9.08
  -6   4  -6   74.74   16.09
   6  -4   6   75.03   17.14
   6  -4   6   90.22   38.60
  -6   0 -12   83.03   26.85
  -6   0 -12   96.70   16.05
   6   0  12   95.31   16.53
  -4  -5 -14   13.11   15.71
   4   5  14   21.05    6.97
   4   5  14   20.87   14.09
  -4  -5 -14   17.37   10.13
   1   4 -15   61.07   30.99
   1   4 -15   40.56   15.46
  -1  -4  15   61.38   31.81
  -1  -4  15   59.52   32.73
  -7   2  -2   29.16   12.33
   7  -2   2    5.85   10.52
   7  -2   2    9.61    6.88
  -5 -10  -3  770.89   33.08
   5  10   3 1000.55   39.22
  -5 -10  -3  800.99   30.58
  -1  10  -1   14.79    7.99
   1 -10   1   17.97    8.70
  -1  10  -1   20.35    8.09
   1 -10   1   20.67    9.96
   1  -5 -13    3.95    9.95
  -1   5  13    8.80    8.47
  -1   5  13    0.06    3.91
   1  -5 -13    2.13    8.95
   6   9   4 1460.47   52.95
  -6  -9  -4 1112.93   41.34
  -6  -9  -4 1333.03   47.32
  -3  -1 -16  277.52   16.67
  -3  -1 -16  294.31   15.87
   3   1  16  255.32   13.01
   3   1  16  277.67   16.35
   6  -3  -4  416.88   24.39
  -6   3   4  363.62   22.42
  -6   3   4  350.88   22.67
   6   9  -1  284.75   32.23
   6   9  -1  208.65   12.21
  -6  -9   1  251.59    8.60
  -6  -9   1  250.38   31.03
  -7   1   2   57.74   25.69
  -7   1   2   36.34   14.75
   7  -1  -2   53.17   23.75
   3  -5  13  273.64   20.19
   3  -5  13  236.94   10.35
  -3   5 -13  265.30   20.77
  -3   5 -13  238.17   13.36
   4   8  -9  204.47   20.17
  -4  -8   9  259.05   21.58
  -4  -8   9  235.20   16.22
   0   9  -9    4.95    5.38
   0   9  -9   -2.51    7.97
   0  -9   9    6.90   12.09
   3   2 -14  612.36   30.27
  -3  -2  14  749.16   33.16
   3   2 -14  720.97   34.68
  -3  -2  14  734.73   27.98
   5  10  -1  581.29   32.65
  -5 -10   1  484.37   33.10
   5  10  -1  422.62   19.19
  -2  -2  15    5.32    4.97
  -2  -2  15    8.20    8.88
   2   2 -15   -1.55   10.89
   2   2 -15    3.29    7.83
   7   4  -5  167.76   10.75
   7   4  -5  121.60   23.82
  -7  -4   5  171.01   29.67
  -1  10  -2  757.56   29.87
   1 -10   2  782.25   31.96
  -1  10  -2  886.27   35.66
   1 -10   2  834.02   32.47
  -7  -2   5  429.91   23.14
   7   2  -5  472.84   25.42
  -7  -2   5  350.23   21.74
  -5   6   0   66.80   11.78
  -5   6   0   69.14   18.88
   5  -6   0   62.16   13.24
   5  -6   0   82.89   43.94
   3  10  -6  441.30   22.09
  -3 -10   6  521.28   27.77
   3  10  -6  470.14   53.63
  -5   0 -14   24.66    8.62
   5   0  14   24.32   15.21
  -5   0 -14   25.76   10.85
   2  -5  14  195.68   19.28
  -2   5 -14  179.10   15.38
   2  -5  14  194.75   10.78
  -2   5 -14  213.90   18.31
  -7   2  -4  253.16   29.48
   7  -2   4  266.38   12.82
   7  -2   4  301.74   18.83
  -3  -1  14   17.40   12.86
  -3  -1  14   17.90    9.78
   3   1 -14   19.17    8.75
   3   1 -14   29.22   15.94
  -3   0 -16   94.00   33.28
   3   0  16   81.62    8.23
   3   0  16  106.20   19.90
  -3   0 -16   87.06   14.20
   1  -9   8  253.91   31.63
   1  -9   8  240.33   11.86
  -1   9  -8  242.16   14.25
  -1   9  -8  262.34   17.16
   1 -10   0  119.82   26.78
   1 -10   0  126.35   25.90
  -1  10   0  139.52   13.72
  -1  10   0  136.60   10.43
   5  -2  -9  256.63   14.49
  -5   2   9  249.12   13.32
  -5   2   9  254.66   15.08
   2  -2  16    8.66    4.86
  -2   2 -16    8.96    8.67
  -2   2 -16   13.09   12.37
   2  -2  16    6.69    8.38
  -4 -10  -6   66.38   12.13
   4  10   6   81.81   11.67
  -4 -10  -6   72.91   15.74
   5  -3  12    6.88    8.52
  -5   3 -12    3.92    9.48
  -5   3 -12    2.80    9.29
  -6  -5   8   48.30   10.62
   6   5  -8   47.29   10.06
   6   5  -8   41.81   15.77
   1  -9  -6  102.43   12.80
  -1   9   6  120.96   25.05
   1  -9  -6   98.56   12.86
  -1   9   6   91.95   10.44
  -2  -8  11 1055.55   42.31
  -2  -8  11  995.77   38.75
   2   8 -11  973.65   40.18
   7  -2   1  271.86   16.64
   7  -2   1  219.58   12.10
  -7   2  -1  228.88   40.70
  -6   3  -9  844.25   35.16
   6  -3   9  838.34   35.65
   6  -3   9  868.90   33.99
   1  10   6  438.94   28.81
  -1 -10  -6  412.07   28.61
  -1 -10  -6  415.79   22.69
   4  -1  15  869.95   36.55
  -4   1 -15  896.16   36.19
  -4   1 -15  857.46   37.35
   4  -1  15  758.81   27.80
   0   8  10   31.12   13.91
   0  -8 -10   42.28   14.99
   0  -8 -10   45.37   19.88
   0   8  10   51.76   19.33
   7   7   6  316.69   10.97
  -7  -7  -6  310.25   13.91
   7   7   6  248.56   12.91
  -2  -5  14   58.76   19.62
  -2  -5  14   49.98    9.29
   2   5 -14   57.81   28.37
   3  -2 -13  657.13   28.61
  -3   2  13  684.99   31.45
   3  -2 -13  636.79   28.38
  -7  -5  -9 1030.16   40.11
   7   5   9  889.81   34.81
  -7  -5  -9  988.36   34.66
  -6   1   7  448.15   25.93
  -6   1   7  495.39   27.26
   6  -1  -7  497.43   25.02
   5  -2  13  143.19   29.31
  -5   2 -13  139.27   27.79
  -5   2 -13  147.05   16.00
   1  -4 -14   79.00   13.44
   1  -4 -14   71.30   11.65
  -1   4  14   75.36   15.35
  -1   4  14   86.57   15.31
  -2   9   3   22.42   10.78
  -2   9   3   22.67   10.75
   2  -9  -3   23.20    8.75
   2  -9  -3   32.39   11.10
  -2 -11   0  970.81   44.35
   2  11   0 1048.83   47.58
   2  11   0  916.63   32.06
  -2 -11   0 1025.76   36.17
  -7  -7   2   59.10   18.80
  -7  -7   2   67.95    7.52
  -7  -7   2   69.26   26.22
   5  -6   5  107.89   12.26
  -5   6  -5  109.52    7.99
  -5   6  -5  109.29   46.35
   5  -6   5  109.62   11.46
   2   0 -15  134.34   14.99
  -2   0  15  159.26    8.78
  -2   0  15  141.82   36.87
   2   0 -15  153.10   14.26
  -1  10  -3  343.56   27.10
   1 -10   3  323.54   15.18
   1 -10   3  335.00   22.60
  -1  10  -3  352.31   19.84
   4   9   9  521.02   44.52
   4   9   9  526.17   31.92
  -4  -9  -9  507.41   47.11
  -7  -3 -10    8.08    6.93
   7   3  10    0.23    8.43
  -7  -3 -10    7.40   11.74
   5  -3  -8   11.10   10.95
  -5   3   8   13.13    8.95
  -5   3   8   12.09    9.60
  -1   6  12  975.14   36.20
  -1   6  12 1092.52   44.14
   1  -6 -12 1051.51   47.55
   1  -6 -12  987.63   41.80
   5   2 -11    5.13    6.63
   5   2 -11    1.64   10.32
  -5  -2  11    7.94   13.27
   3   2  16 1045.38   41.53
   3   2  16  921.26   34.21
  -3  -2 -16 1100.67   40.39
  -3  -2 -16 1052.31   40.42
   0   5  14  902.26   49.70
   0   5  14  877.14   44.21
   0  -5 -14  873.93   36.56
   0  -5 -14  838.41   37.99
   2  11  -1   13.14    9.97
   2  11  -1   19.17   12.79
  -2 -11   1   34.14   23.38
  -2 -11   1   28.17    7.71
  -7  -2 -10  217.94   19.40
   7   2  10  182.70   13.21
  -7  -2 -10  197.60   13.62
   0 -10   6  499.05   27.34
   0 -10   6  553.43   23.97
   0  10  -6  586.45   30.39
   0  10  -6  541.08   27.37
  -7  -6  -8   86.40    5.76
   7   6   8   98.21    7.14
  -7  -6  -8  106.04   12.04
   7   6   8   84.17   12.30
  -4  -5  12   12.79   16.84
  -4  -5  12   11.13    6.34
   4   5 -12   13.49   12.38
  -2 -11  -1  908.78   37.69
   2  11   1 1110.80   46.59
   2  11   1  848.51   29.46
  -2 -11  -1  894.71   38.17
  -5  -3  11    3.16    7.37
   5   3 -11   -4.44   10.51
   5   3 -11    2.49    6.98
  -4   1  12  133.49   18.68
   4  -1 -12  129.04   14.04
   4  -1 -12  123.89   17.63
   0   6  13   34.85   16.11
   0   6  13   29.83   13.48
   0  -6 -13   33.42   18.56
   0  -6 -13   38.09   17.81
   3   3 -14  701.11   31.31
[truncated: 404,017 more chars]
