# Supplementary material
Source: MDPI journal article supplement (https://www.mdpi.com/2304-6740/6/1/30)
Supplement: s1 [file s1 › EindSiImiPr2Me2_2_Br_rev.cif]

 
data_EindSi_ImiPr2Me2_2_Br
 
_audit_creation_method            'SHELXL-2017/1'
_shelx_SHELXL_version_number      '2017/1'
_chemical_name_systematic         ?
_chemical_name_common             ?
_chemical_melting_point           ?
_chemical_formula_moiety          'C50 H85 N4 Si, C6 H6, Br' 
_chemical_formula_sum             'C56 H91 Br N4 Si' 
_chemical_formula_weight          928.32

loop_
 _atom_type_symbol
 _atom_type_description
 _atom_type_scat_dispersion_real
 _atom_type_scat_dispersion_imag
 _atom_type_scat_source
 'C'  'C'   0.0033   0.0016
 'International Tables Vol C Tables 4.2.6.8 and 6.1.1.4'
 'H'  'H'   0.0000   0.0000
 'International Tables Vol C Tables 4.2.6.8 and 6.1.1.4'
 'Br'  'Br'  -0.2901   2.4595
 'International Tables Vol C Tables 4.2.6.8 and 6.1.1.4'
 'N'  'N'   0.0061   0.0033
 'International Tables Vol C Tables 4.2.6.8 and 6.1.1.4'
 'Si'  'Si'   0.0817   0.0704
 'International Tables Vol C Tables 4.2.6.8 and 6.1.1.4'
 
_space_group_crystal_system       triclinic
_space_group_IT_number            2
_space_group_name_H-M_alt         'P -1'
_space_group_name_Hall            '-P 1'
 
_shelx_space_group_comment
;
The symmetry employed for this shelxl refinement is uniquely defined
by the following loop, which should always be used as a source of
symmetry information in preference to the above space-group names.
They are only intended as comments.
;
 
loop_
 _space_group_symop_operation_xyz
 'x, y, z'
 '-x, -y, -z'
 
_cell_length_a                    10.6548(3)
_cell_length_b                    12.0149(2)
_cell_length_c                    21.7366(5)
_cell_angle_alpha                 80.5199(18)
_cell_angle_beta                  82.343(2)
_cell_angle_gamma                 72.816(2)
_cell_volume                      2611.54(11)
_cell_formula_units_Z             2
_cell_measurement_temperature     100(2)
_cell_measurement_reflns_used     19725
_cell_measurement_theta_min       3.1320
_cell_measurement_theta_max       30.2730
 
_exptl_crystal_description        'Plate'
_exptl_crystal_colour             'Red'
_exptl_crystal_density_meas       ?
_exptl_crystal_density_method     ?
_exptl_crystal_density_diffrn     1.181          
_exptl_crystal_F_000              1008
_exptl_transmission_factor_min    ?
_exptl_transmission_factor_max    ?
_exptl_crystal_size_max           0.363
_exptl_crystal_size_mid           0.145
_exptl_crystal_size_min           0.121
_exptl_absorpt_coefficient_mu     0.849
_shelx_estimated_absorpt_T_min    0.748
_shelx_estimated_absorpt_T_max    0.904
_exptl_absorpt_correction_type    multi-scan
_exptl_absorpt_correction_T_min   0.81349
_exptl_absorpt_correction_T_max   1.00000
_exptl_absorpt_process_details    
;
CrysAlisPro 1.171.39.20a (Rigaku Oxford Diffraction, 2015)
Empirical absorption correction using spherical harmonics,
 implemented in SCALE3 ABSPACK scaling algorithm.
;
_exptl_absorpt_special_details    ?
_diffrn_ambient_temperature       100(2)
_diffrn_radiation_wavelength      0.71073
_diffrn_radiation_type            MoK\a
_diffrn_source                    'fine-focus sealed X-ray tube'
_diffrn_measurement_device_type   'XtaLAB Pro: Kappa single'
_diffrn_measurement_method        '\w scans'
_diffrn_detector_area_resol_mean  5.811
_diffrn_reflns_number             65594
_diffrn_reflns_av_unetI/netI      0.0324
_diffrn_reflns_av_R_equivalents   0.0404
_diffrn_reflns_limit_h_min        -13
_diffrn_reflns_limit_h_max        15
_diffrn_reflns_limit_k_min        -16
_diffrn_reflns_limit_k_max        16
_diffrn_reflns_limit_l_min        -30
_diffrn_reflns_limit_l_max        29
_diffrn_reflns_theta_min          2.784
_diffrn_reflns_theta_max          30.320
_diffrn_reflns_theta_full         25.242
_diffrn_measured_fraction_theta_max   0.879
_diffrn_measured_fraction_theta_full  0.999
_diffrn_reflns_Laue_measured_fraction_max    0.879
_diffrn_reflns_Laue_measured_fraction_full   0.999
_diffrn_reflns_point_group_measured_fraction_max   0.879
_diffrn_reflns_point_group_measured_fraction_full  0.999
_reflns_number_total              13761
_reflns_number_gt                 11386
_reflns_threshold_expression      'I > 2\s(I)'
_reflns_Friedel_coverage          0.000
_reflns_Friedel_fraction_max      .
_reflns_Friedel_fraction_full     .
 
_reflns_special_details
;
 Reflections were merged by SHELXL according to the crystal
 class for the calculation of statistics and refinement.
 
 _reflns_Friedel_fraction is defined as the number of unique
 Friedel pairs measured divided by the number that would be
 possible theoretically, ignoring centric projections and
 systematic absences.
;
 
_computing_data_collection        'CrysAlisPro 1.171.39.20a (Rigaku OD, 2015)'
_computing_cell_refinement        'CrysAlisPro 1.171.39.20a (Rigaku OD, 2015)'
_computing_data_reduction         'CrysAlisPro 1.171.39.20a (Rigaku OD, 2015)'
_computing_structure_solution     'SIR2011'
_computing_structure_refinement 'SHELXL-2017/1 (Sheldrick, 2017)'
_computing_molecular_graphics     'SHELXLE'
_computing_publication_material    'SHELXL-2017/1 (Sheldrick, 2017)'
_refine_special_details           ?
_refine_ls_structure_factor_coef  Fsqd
_refine_ls_matrix_type            full
_refine_ls_weighting_scheme       calc
_refine_ls_weighting_details
'w=1/[\s^2^(Fo^2^)+(0.0658P)^2^+3.2732P] where P=(Fo^2^+2Fc^2^)/3'
_atom_sites_solution_primary      direct
_atom_sites_solution_secondary    difmap
_atom_sites_solution_hydrogens    geom
_refine_ls_hydrogen_treatment     constr
_refine_ls_extinction_method      none
_refine_ls_extinction_coef        .
_refine_ls_number_reflns          13761
_refine_ls_number_parameters      579
_refine_ls_number_restraints      0
_refine_ls_R_factor_all           0.0623
_refine_ls_R_factor_gt            0.0491
_refine_ls_wR_factor_ref          0.1364
_refine_ls_wR_factor_gt           0.1295
_refine_ls_goodness_of_fit_ref    1.031
_refine_ls_restrained_S_all       1.031
_refine_ls_shift/su_max           0.001
_refine_ls_shift/su_mean          0.000
 
loop_
 _atom_site_label
 _atom_site_type_symbol
 _atom_site_fract_x
 _atom_site_fract_y
 _atom_site_fract_z
 _atom_site_U_iso_or_equiv
 _atom_site_adp_type
 _atom_site_occupancy
 _atom_site_site_symmetry_order  
 _atom_site_calc_flag
 _atom_site_refinement_flags_posn
 _atom_site_refinement_flags_adp
 _atom_site_refinement_flags_occupancy
 _atom_site_disorder_assembly
 _atom_site_disorder_group
Br1 Br 0.10950(2) -0.26870(2) 0.05698(2) 0.02856(8) Uani 1 1 d . . . . .
Si1 Si 0.36357(5) 0.06902(5) 0.25975(2) 0.01421(11) Uani 1 1 d . . . . .
N1 N 0.58717(16) 0.05336(14) 0.15664(8) 0.0166(3) Uani 1 1 d . . . . .
N2 N 0.63367(16) -0.06798(14) 0.24162(8) 0.0160(3) Uani 1 1 d . . . . .
N3 N 0.18107(17) 0.24640(15) 0.17131(8) 0.0180(3) Uani 1 1 d . . . . .
N4 N 0.22522(17) 0.06422(16) 0.15628(8) 0.0194(3) Uani 1 1 d . . . . .
C1 C 0.30491(17) 0.18561(15) 0.31773(8) 0.0115(3) Uani 1 1 d . . . . .
C2 C 0.35745(17) 0.27548(16) 0.33026(9) 0.0125(3) Uani 1 1 d . . . . .
C3 C 0.49920(18) 0.28792(17) 0.31565(9) 0.0148(3) Uani 1 1 d . . . . .
C4 C 0.49552(19) 0.39142(18) 0.35145(10) 0.0186(4) Uani 1 1 d . . . . .
H4A H 0.542247 0.360659 0.389809 0.022 Uiso 1 1 calc R U . . .
H4B H 0.540027 0.446064 0.324616 0.022 Uiso 1 1 calc R U . . .
C5 C 0.35022(18) 0.45667(16) 0.36893(9) 0.0150(3) Uani 1 1 d . . . . .
C6 C 0.28230(18) 0.36350(16) 0.36589(9) 0.0133(3) Uani 1 1 d . . . . .
C7 C 0.15806(18) 0.36234(16) 0.39451(9) 0.0136(3) Uani 1 1 d . . . . .
H7 H 0.106567 0.424306 0.417051 0.016 Uiso 1 1 calc R U . . .
C8 C 0.11100(17) 0.26877(16) 0.38942(8) 0.0119(3) Uani 1 1 d . . . . .
C9 C -0.01598(17) 0.24973(16) 0.42387(9) 0.0128(3) Uani 1 1 d . . . . .
C10 C 0.00297(19) 0.11982(16) 0.41819(9) 0.0152(3) Uani 1 1 d . . . . .
H10A H -0.081982 0.107961 0.411400 0.018 Uiso 1 1 calc R U . . .
H10B H 0.034023 0.070025 0.457288 0.018 Uiso 1 1 calc R U . . .
C11 C 0.10649(18) 0.08453(16) 0.36190(9) 0.0123(3) Uani 1 1 d . . . . .
C12 C 0.18184(17) 0.18012(15) 0.35303(8) 0.0111(3) Uani 1 1 d . . . . .
C13 C 0.59989(19) 0.17437(18) 0.34216(10) 0.0195(4) Uani 1 1 d . . . . .
H13A H 0.606255 0.112374 0.316067 0.023 Uiso 1 1 calc R U . . .
H13B H 0.687455 0.189181 0.337759 0.023 Uiso 1 1 calc R U . . .
C14 C 0.5698(2) 0.1273(2) 0.41031(11) 0.0275(5) Uani 1 1 d . . . . .
H14A H 0.569510 0.185371 0.437201 0.041 Uiso 1 1 calc R U . . .
H14B H 0.637474 0.053943 0.421929 0.041 Uiso 1 1 calc R U . . .
H14C H 0.483174 0.112423 0.415626 0.041 Uiso 1 1 calc R U . . .
C15 C 0.53746(19) 0.31887(19) 0.24548(10) 0.0196(4) Uani 1 1 d . . . . .
H15A H 0.473583 0.393139 0.229661 0.024 Uiso 1 1 calc R U . . .
H15B H 0.529646 0.256467 0.222865 0.024 Uiso 1 1 calc R U . . .
C16 C 0.6778(2) 0.3330(2) 0.22991(12) 0.0312(5) Uani 1 1 d . . . . .
H16A H 0.692925 0.382545 0.258161 0.047 Uiso 1 1 calc R U . . .
H16B H 0.687368 0.369893 0.186497 0.047 Uiso 1 1 calc R U . . .
H16C H 0.742487 0.255568 0.235166 0.047 Uiso 1 1 calc R U . . .
C17 C 0.3304(2) 0.49340(18) 0.43492(10) 0.0189(4) Uani 1 1 d . . . . .
H17A H 0.234634 0.523954 0.446586 0.023 Uiso 1 1 calc R U . . .
H17B H 0.364837 0.422863 0.465080 0.023 Uiso 1 1 calc R U . . .
C18 C 0.3977(2) 0.5867(2) 0.44107(11) 0.0250(4) Uani 1 1 d . . . . .
H18A H 0.491871 0.559258 0.427428 0.037 Uiso 1 1 calc R U . . .
H18B H 0.386959 0.600735 0.484876 0.037 Uiso 1 1 calc R U . . .
H18C H 0.357494 0.659996 0.414844 0.037 Uiso 1 1 calc R U . . .
C19 C 0.3012(2) 0.56345(17) 0.31887(10) 0.0199(4) Uani 1 1 d . . . . .
H19A H 0.359762 0.615101 0.315374 0.024 Uiso 1 1 calc R U . . .
H19B H 0.310674 0.534439 0.277956 0.024 Uiso 1 1 calc R U . . .
C20 C 0.1588(2) 0.63751(18) 0.33097(12) 0.0258(5) Uani 1 1 d . . . . .
H20A H 0.099910 0.586644 0.337756 0.039 Uiso 1 1 calc R U . . .
H20B H 0.134463 0.697122 0.294701 0.039 Uiso 1 1 calc R U . . .
H20C H 0.150575 0.676217 0.368211 0.039 Uiso 1 1 calc R U . . .
C21 C -0.03256(19) 0.27253(18) 0.49276(9) 0.0166(4) Uani 1 1 d . . . . .
H21A H -0.049844 0.358002 0.493274 0.020 Uiso 1 1 calc R U . . .
H21B H -0.111566 0.250131 0.513730 0.020 Uiso 1 1 calc R U . . .
C22 C 0.0836(2) 0.2082(2) 0.53121(10) 0.0231(4) Uani 1 1 d . . . . .
H22A H 0.097043 0.123252 0.534528 0.035 Uiso 1 1 calc R U . . .
H22B H 0.065104 0.232279 0.573191 0.035 Uiso 1 1 calc R U . . .
H22C H 0.163383 0.227851 0.510610 0.035 Uiso 1 1 calc R U . . .
C23 C -0.13998(19) 0.32709(18) 0.39146(10) 0.0178(4) Uani 1 1 d . . . . .
H23A H -0.133347 0.304344 0.349139 0.021 Uiso 1 1 calc R U . . .
H23B H -0.218189 0.307439 0.415332 0.021 Uiso 1 1 calc R U . . .
C24 C -0.1654(2) 0.46012(19) 0.38447(11) 0.0237(4) Uani 1 1 d . . . . .
H24A H -0.176649 0.485316 0.425995 0.036 Uiso 1 1 calc R U . . .
H24B H -0.245559 0.498461 0.363097 0.036 Uiso 1 1 calc R U . . .
H24C H -0.090301 0.482056 0.359830 0.036 Uiso 1 1 calc R U . . .
C25 C 0.1913(2) -0.04344(16) 0.38016(9) 0.0166(4) Uani 1 1 d . . . . .
H25A H 0.131396 -0.092645 0.396947 0.020 Uiso 1 1 calc R U . . .
H25B H 0.241196 -0.073923 0.341777 0.020 Uiso 1 1 calc R U . . .
C26 C 0.2886(2) -0.05761(18) 0.42826(10) 0.0218(4) Uani 1 1 d . . . . .
H26A H 0.355126 -0.017026 0.410335 0.033 Uiso 1 1 calc R U . . .
H26B H 0.331921 -0.141313 0.439729 0.033 Uiso 1 1 calc R U . . .
H26C H 0.241254 -0.023611 0.465660 0.033 Uiso 1 1 calc R U . . .
C27 C 0.03710(19) 0.09061(17) 0.30268(9) 0.0154(3) Uani 1 1 d . . . . .
H27A H -0.018040 0.172231 0.292252 0.018 Uiso 1 1 calc R U . . .
H27B H 0.105532 0.072793 0.267343 0.018 Uiso 1 1 calc R U . . .
C28 C -0.0500(2) 0.00775(18) 0.30785(10) 0.0201(4) Uani 1 1 d . . . . .
H28A H 0.004368 -0.073904 0.315011 0.030 Uiso 1 1 calc R U . . .
H28B H -0.092287 0.020489 0.268919 0.030 Uiso 1 1 calc R U . . .
H28C H -0.117909 0.023663 0.342930 0.030 Uiso 1 1 calc R U . . .
C29 C 0.54210(19) 0.03093(17) 0.21806(9) 0.0160(4) Uani 1 1 d . . . . .
C30 C 0.7034(2) -0.03279(18) 0.14174(10) 0.0198(4) Uani 1 1 d . . . . .
C31 C 0.7336(2) -0.10758(18) 0.19540(10) 0.0190(4) Uani 1 1 d . . . . .
C32 C 0.5361(2) 0.16619(18) 0.11615(10) 0.0227(4) Uani 1 1 d . . . . .
H32 H 0.464998 0.217350 0.142319 0.027 Uiso 1 1 calc R U . . .
C33 C 0.6443(3) 0.2299(2) 0.09679(13) 0.0345(6) Uani 1 1 d . . . . .
H33A H 0.705012 0.209763 0.129636 0.052 Uiso 1 1 calc R U . . .
H33B H 0.603537 0.315061 0.090927 0.052 Uiso 1 1 calc R U . . .
H33C H 0.693127 0.205455 0.057496 0.052 Uiso 1 1 calc R U . . .
C34 C 0.4739(2) 0.1549(2) 0.05934(11) 0.0307(5) Uani 1 1 d . . . . .
H34A H 0.536667 0.096481 0.035397 0.046 Uiso 1 1 calc R U . . .
H34B H 0.451112 0.231044 0.032842 0.046 Uiso 1 1 calc R U . . .
H34C H 0.393956 0.129831 0.073124 0.046 Uiso 1 1 calc R U . . .
C35 C 0.7714(2) -0.0426(2) 0.07723(11) 0.0282(5) Uani 1 1 d . . . . .
H35A H 0.856662 -0.102654 0.079497 0.042 Uiso 1 1 calc R U . . .
H35B H 0.785597 0.033206 0.058617 0.042 Uiso 1 1 calc R U . . .
H35C H 0.716579 -0.064919 0.051308 0.042 Uiso 1 1 calc R U . . .
C36 C 0.8530(2) -0.2099(2) 0.20547(11) 0.0271(5) Uani 1 1 d . . . . .
H36A H 0.905588 -0.222591 0.165366 0.041 Uiso 1 1 calc R U . . .
H36B H 0.825502 -0.280426 0.223043 0.041 Uiso 1 1 calc R U . . .
H36C H 0.906071 -0.193597 0.234586 0.041 Uiso 1 1 calc R U . . .
C37 C 0.60755(19) -0.13562(17) 0.30296(9) 0.0169(4) Uani 1 1 d . . . . .
H37 H 0.531159 -0.082380 0.325450 0.020 Uiso 1 1 calc R U . . .
C38 C 0.7207(2) -0.1693(2) 0.34487(11) 0.0238(4) Uani 1 1 d . . . . .
H38A H 0.791952 -0.233720 0.329325 0.036 Uiso 1 1 calc R U . . .
H38B H 0.688948 -0.194575 0.387792 0.036 Uiso 1 1 calc R U . . .
H38C H 0.753790 -0.101215 0.344396 0.036 Uiso 1 1 calc R U . . .
C39 C 0.5624(2) -0.2401(2) 0.29436(12) 0.0265(5) Uani 1 1 d . . . . .
H39A H 0.487905 -0.213417 0.268391 0.040 Uiso 1 1 calc R U . . .
H39B H 0.534851 -0.277796 0.335344 0.040 Uiso 1 1 calc R U . . .
H39C H 0.635205 -0.296737 0.273780 0.040 Uiso 1 1 calc R U . . .
C40 C 0.2621(2) 0.13706(18) 0.18807(9) 0.0175(4) Uani 1 1 d . . . . .
C41 C 0.0930(2) 0.2409(2) 0.13066(10) 0.0225(4) Uani 1 1 d . . . . .
C42 C 0.1205(2) 0.1265(2) 0.12143(10) 0.0226(4) Uani 1 1 d . . . . .
C43 C 0.1947(2) 0.35395(18) 0.19122(10) 0.0211(4) Uani 1 1 d . . . . .
H43 H 0.263739 0.327464 0.221581 0.025 Uiso 1 1 calc R U . . .
C44 C 0.2453(2) 0.4318(2) 0.13673(11) 0.0286(5) Uani 1 1 d . . . . .
H44A H 0.321205 0.383588 0.113279 0.043 Uiso 1 1 calc R U . . .
H44B H 0.272064 0.491945 0.152989 0.043 Uiso 1 1 calc R U . . .
H44C H 0.175114 0.469959 0.108953 0.043 Uiso 1 1 calc R U . . .
C45 C 0.0697(2) 0.4214(2) 0.22601(11) 0.0287(5) Uani 1 1 d . . . . .
H45A H 0.001647 0.456479 0.196812 0.043 Uiso 1 1 calc R U . . .
H45B H 0.088027 0.483685 0.244291 0.043 Uiso 1 1 calc R U . . .
H45C H 0.038710 0.367723 0.259412 0.043 Uiso 1 1 calc R U . . .
C46 C -0.0136(2) 0.3424(2) 0.10441(12) 0.0290(5) Uani 1 1 d . . . . .
H46A H -0.039506 0.323764 0.066566 0.043 Uiso 1 1 calc R U . . .
H46B H 0.018690 0.412166 0.093907 0.043 Uiso 1 1 calc R U . . .
H46C H -0.090039 0.357779 0.135535 0.043 Uiso 1 1 calc R U . . .
C47 C 0.0465(3) 0.0743(2) 0.08612(12) 0.0329(5) Uani 1 1 d . . . . .
H47A H -0.022720 0.049532 0.114446 0.049 Uiso 1 1 calc R U . . .
H47B H 0.107218 0.006049 0.068553 0.049 Uiso 1 1 calc R U . . .
H47C H 0.006405 0.132939 0.052107 0.049 Uiso 1 1 calc R U . . .
C48 C 0.2945(2) -0.0626(2) 0.15734(10) 0.0254(4) Uani 1 1 d . . . . .
H48 H 0.372255 -0.078834 0.181956 0.030 Uiso 1 1 calc R U . . .
C49 C 0.3491(3) -0.0936(2) 0.09152(13) 0.0363(6) Uani 1 1 d . . . . .
H49A H 0.333953 -0.021635 0.061489 0.054 Uiso 1 1 calc R U . . .
H49B H 0.304191 -0.146506 0.079878 0.054 Uiso 1 1 calc R U . . .
H49C H 0.443920 -0.132630 0.091122 0.054 Uiso 1 1 calc R U . . .
C50 C 0.2092(3) -0.1384(2) 0.19168(12) 0.0370(6) Uani 1 1 d . . . . .
H50A H 0.185123 -0.120448 0.234804 0.056 Uiso 1 1 calc R U . . .
H50B H 0.258188 -0.221475 0.192105 0.056 Uiso 1 1 calc R U . . .
H50C H 0.128955 -0.122112 0.170350 0.056 Uiso 1 1 calc R U . . .
C51 C 0.6676(3) 0.5239(2) 0.03368(14) 0.0428(7) Uani 1 1 d . . . . .
H51 H 0.671156 0.473912 0.003497 0.051 Uiso 1 1 calc R U . . .
C52 C 0.7711(3) 0.5685(3) 0.03533(14) 0.0422(7) Uani 1 1 d . . . . .
H52 H 0.845717 0.550200 0.005693 0.051 Uiso 1 1 calc R U . . .
C53 C 0.7685(3) 0.6397(3) 0.07952(17) 0.0501(8) Uani 1 1 d . . . . .
H53 H 0.840823 0.670234 0.080361 0.060 Uiso 1 1 calc R U . . .
C54 C 0.6605(4) 0.6659(3) 0.12222(19) 0.0608(10) Uani 1 1 d . . . . .
H54 H 0.658504 0.714334 0.152943 0.073 Uiso 1 1 calc R U . . .
C55 C 0.5551(4) 0.6224(3) 0.12086(19) 0.0587(9) Uani 1 1 d . . . . .
H55 H 0.480645 0.640879 0.150587 0.070 Uiso 1 1 calc R U . . .
C56 C 0.5578(3) 0.5517(3) 0.07601(17) 0.0497(8) Uani 1 1 d . . . . .
H56 H 0.484684 0.522622 0.074403 0.060 Uiso 1 1 calc R U . . .
 
loop_
 _atom_site_aniso_label
 _atom_site_aniso_U_11
 _atom_site_aniso_U_22
 _atom_site_aniso_U_33
 _atom_site_aniso_U_23
 _atom_site_aniso_U_13
 _atom_site_aniso_U_12
Br1 0.03057(13) 0.02300(12) 0.02613(12) -0.00455(8) -0.00217(9) 0.00214(9)
Si1 0.0141(2) 0.0137(2) 0.0131(2) -0.00154(18) -0.00106(18) -0.00135(19)
N1 0.0165(8) 0.0145(7) 0.0159(8) -0.0019(6) 0.0008(6) -0.0011(6)
N2 0.0160(8) 0.0128(7) 0.0174(8) -0.0007(6) -0.0010(6) -0.0025(6)
N3 0.0163(8) 0.0186(8) 0.0158(8) 0.0013(6) -0.0022(6) -0.0015(6)
N4 0.0202(8) 0.0224(8) 0.0137(8) -0.0034(6) -0.0022(6) -0.0022(7)
C1 0.0116(8) 0.0101(7) 0.0114(8) -0.0002(6) -0.0012(6) -0.0015(6)
C2 0.0107(8) 0.0114(8) 0.0147(8) -0.0001(6) -0.0004(6) -0.0031(6)
C3 0.0100(8) 0.0154(8) 0.0192(9) -0.0036(7) 0.0003(7) -0.0040(7)
C4 0.0137(9) 0.0174(9) 0.0269(10) -0.0068(8) 0.0020(7) -0.0073(7)
C5 0.0136(8) 0.0122(8) 0.0201(9) -0.0037(7) 0.0021(7) -0.0060(7)
C6 0.0129(8) 0.0108(8) 0.0164(9) -0.0015(6) -0.0006(7) -0.0041(6)
C7 0.0122(8) 0.0118(8) 0.0163(9) -0.0029(6) 0.0011(7) -0.0032(6)
C8 0.0104(8) 0.0122(8) 0.0125(8) 0.0001(6) -0.0002(6) -0.0035(6)
C9 0.0104(8) 0.0137(8) 0.0134(8) -0.0013(6) 0.0021(6) -0.0036(6)
C10 0.0159(8) 0.0145(8) 0.0157(9) -0.0009(7) 0.0028(7) -0.0074(7)
C11 0.0133(8) 0.0112(8) 0.0130(8) -0.0003(6) 0.0002(6) -0.0056(6)
C12 0.0112(8) 0.0112(8) 0.0108(8) 0.0007(6) -0.0017(6) -0.0035(6)
C13 0.0137(9) 0.0181(9) 0.0269(10) -0.0061(8) -0.0048(8) -0.0018(7)
C14 0.0277(11) 0.0259(11) 0.0285(11) 0.0035(9) -0.0113(9) -0.0069(9)
C15 0.0142(9) 0.0237(10) 0.0205(10) -0.0024(8) 0.0042(7) -0.0076(8)
C16 0.0199(10) 0.0465(14) 0.0299(12) -0.0046(10) 0.0065(9) -0.0174(10)
C17 0.0196(9) 0.0173(9) 0.0225(10) -0.0066(7) 0.0015(8) -0.0087(7)
C18 0.0267(11) 0.0218(10) 0.0312(12) -0.0095(9) -0.0008(9) -0.0118(9)
C19 0.0198(9) 0.0144(9) 0.0247(10) -0.0005(7) 0.0024(8) -0.0067(7)
C20 0.0235(10) 0.0138(9) 0.0365(12) 0.0001(8) 0.0003(9) -0.0028(8)
C21 0.0152(9) 0.0200(9) 0.0141(9) -0.0039(7) 0.0036(7) -0.0053(7)
C22 0.0222(10) 0.0302(11) 0.0151(9) -0.0031(8) -0.0010(8) -0.0051(9)
C23 0.0117(8) 0.0206(9) 0.0211(10) -0.0021(7) -0.0013(7) -0.0047(7)
C24 0.0180(10) 0.0195(10) 0.0298(11) 0.0000(8) -0.0041(8) -0.0004(8)
C25 0.0212(9) 0.0107(8) 0.0172(9) 0.0007(7) -0.0007(7) -0.0053(7)
C26 0.0251(10) 0.0156(9) 0.0224(10) 0.0025(7) -0.0063(8) -0.0031(8)
C27 0.0155(8) 0.0165(8) 0.0159(9) -0.0029(7) -0.0010(7) -0.0069(7)
C28 0.0163(9) 0.0191(9) 0.0278(11) -0.0082(8) -0.0010(8) -0.0071(7)
C29 0.0170(9) 0.0133(8) 0.0170(9) -0.0015(7) -0.0015(7) -0.0034(7)
C30 0.0180(9) 0.0188(9) 0.0207(10) -0.0054(7) 0.0020(8) -0.0021(7)
C31 0.0164(9) 0.0160(9) 0.0223(10) -0.0049(7) 0.0011(7) -0.0011(7)
C32 0.0274(11) 0.0165(9) 0.0175(9) 0.0041(7) 0.0037(8) -0.0019(8)
C33 0.0408(14) 0.0244(11) 0.0350(13) -0.0015(10) 0.0160(11) -0.0136(10)
C34 0.0299(12) 0.0367(13) 0.0169(10) 0.0008(9) 0.0001(9) 0.0002(10)
C35 0.0266(11) 0.0298(11) 0.0214(11) -0.0052(9) 0.0032(9) 0.0010(9)
C36 0.0221(10) 0.0227(10) 0.0287(11) -0.0030(9) -0.0003(9) 0.0045(8)
C37 0.0160(9) 0.0141(8) 0.0196(9) 0.0028(7) -0.0032(7) -0.0048(7)
C38 0.0245(10) 0.0227(10) 0.0242(10) 0.0030(8) -0.0091(8) -0.0070(8)
C39 0.0294(11) 0.0201(10) 0.0319(12) 0.0033(8) -0.0081(9) -0.0111(9)
C40 0.0175(9) 0.0188(9) 0.0129(8) -0.0011(7) 0.0008(7) -0.0016(7)
C41 0.0198(10) 0.0267(11) 0.0177(9) 0.0015(8) -0.0039(8) -0.0030(8)
C42 0.0209(10) 0.0284(11) 0.0160(9) 0.0000(8) -0.0035(8) -0.0037(8)
C43 0.0243(10) 0.0156(9) 0.0202(10) 0.0021(7) -0.0041(8) -0.0023(8)
C44 0.0314(12) 0.0204(10) 0.0287(12) 0.0070(9) -0.0017(9) -0.0051(9)
C45 0.0333(12) 0.0228(11) 0.0247(11) -0.0030(9) -0.0002(9) -0.0011(9)
C46 0.0231(11) 0.0297(12) 0.0287(12) 0.0031(9) -0.0088(9) -0.0001(9)
C47 0.0333(13) 0.0350(13) 0.0322(13) -0.0056(10) -0.0139(10) -0.0067(10)
C48 0.0318(11) 0.0219(10) 0.0206(10) -0.0067(8) -0.0058(9) -0.0009(9)
C49 0.0455(15) 0.0317(13) 0.0300(13) -0.0126(10) 0.0093(11) -0.0092(11)
C50 0.0544(17) 0.0237(11) 0.0283(12) -0.0055(9) 0.0087(11) -0.0082(11)
C51 0.0623(19) 0.0291(13) 0.0350(14) 0.0010(11) -0.0055(13) -0.0122(13)
C52 0.0391(15) 0.0408(15) 0.0359(14) 0.0070(12) -0.0037(12) -0.0011(12)
C53 0.0445(17) 0.0452(17) 0.063(2) -0.0042(15) -0.0210(15) -0.0103(14)
C54 0.076(3) 0.0463(19) 0.062(2) -0.0254(17) -0.0031(19) -0.0128(18)
C55 0.059(2) 0.0365(16) 0.066(2) -0.0105(15) 0.0196(17) 0.0003(15)
C56 0.0495(18) 0.0309(14) 0.067(2) 0.0046(14) -0.0009(15) -0.0164(13)
 
_geom_special_details
;
 All esds (except the esd in the dihedral angle between two l.s. planes)
 are estimated using the full covariance matrix.  The cell esds are taken
 into account individually in the estimation of esds in distances, angles
 and torsion angles; correlations between esds in cell parameters are only
 used when they are defined by crystal symmetry.  An approximate (isotropic)
 treatment of cell esds is used for estimating esds involving l.s. planes.
;
 
loop_
 _geom_bond_atom_site_label_1
 _geom_bond_atom_site_label_2
 _geom_bond_distance
 _geom_bond_site_symmetry_2
 _geom_bond_publ_flag
Si1 C40 1.942(2) . ?
Si1 C1 1.9482(19) . ?
Si1 C29 1.953(2) . ?
N1 C29 1.368(3) . ?
N1 C30 1.399(3) . ?
N1 C32 1.486(3) . ?
N2 C29 1.369(2) . ?
N2 C31 1.393(3) . ?
N2 C37 1.481(2) . ?
N3 C40 1.364(3) . ?
N3 C41 1.393(3) . ?
N3 C43 1.480(3) . ?
N4 C40 1.368(3) . ?
N4 C42 1.387(3) . ?
N4 C48 1.482(3) . ?
C1 C2 1.431(2) . ?
C1 C12 1.442(2) . ?
C2 C6 1.401(3) . ?
C2 C3 1.547(2) . ?
C3 C15 1.539(3) . ?
C3 C13 1.544(3) . ?
C3 C4 1.561(3) . ?
C4 C5 1.543(3) . ?
C4 H4A 0.9900 . ?
C4 H4B 0.9900 . ?
C5 C6 1.516(2) . ?
C5 C17 1.539(3) . ?
C5 C19 1.549(3) . ?
C6 C7 1.389(3) . ?
C7 C8 1.384(2) . ?
C7 H7 0.9500 . ?
C8 C12 1.405(2) . ?
C8 C9 1.517(2) . ?
C9 C10 1.537(3) . ?
C9 C21 1.544(3) . ?
C9 C23 1.553(3) . ?
C10 C11 1.558(3) . ?
C10 H10A 0.9900 . ?
C10 H10B 0.9900 . ?
C11 C27 1.549(3) . ?
C11 C25 1.553(3) . ?
C11 C12 1.559(2) . ?
C13 C14 1.523(3) . ?
C13 H13A 0.9900 . ?
C13 H13B 0.9900 . ?
C14 H14A 0.9800 . ?
C14 H14B 0.9800 . ?
C14 H14C 0.9800 . ?
C15 C16 1.542(3) . ?
C15 H15A 0.9900 . ?
C15 H15B 0.9900 . ?
C16 H16A 0.9800 . ?
C16 H16B 0.9800 . ?
C16 H16C 0.9800 . ?
C17 C18 1.530(3) . ?
C17 H17A 0.9900 . ?
C17 H17B 0.9900 . ?
C18 H18A 0.9800 . ?
C18 H18B 0.9800 . ?
C18 H18C 0.9800 . ?
C19 C20 1.529(3) . ?
C19 H19A 0.9900 . ?
C19 H19B 0.9900 . ?
C20 H20A 0.9800 . ?
C20 H20B 0.9800 . ?
C20 H20C 0.9800 . ?
C21 C22 1.525(3) . ?
C21 H21A 0.9900 . ?
C21 H21B 0.9900 . ?
C22 H22A 0.9800 . ?
C22 H22B 0.9800 . ?
C22 H22C 0.9800 . ?
C23 C24 1.525(3) . ?
C23 H23A 0.9900 . ?
C23 H23B 0.9900 . ?
C24 H24A 0.9800 . ?
C24 H24B 0.9800 . ?
C24 H24C 0.9800 . ?
C25 C26 1.524(3) . ?
C25 H25A 0.9900 . ?
C25 H25B 0.9900 . ?
C26 H26A 0.9800 . ?
C26 H26B 0.9800 . ?
C26 H26C 0.9800 . ?
C27 C28 1.532(3) . ?
C27 H27A 0.9900 . ?
C27 H27B 0.9900 . ?
C28 H28A 0.9800 . ?
C28 H28B 0.9800 . ?
C28 H28C 0.9800 . ?
C30 C31 1.362(3) . ?
C30 C35 1.496(3) . ?
C31 C36 1.496(3) . ?
C32 C34 1.519(3) . ?
C32 C33 1.543(3) . ?
C32 H32 1.0000 . ?
C33 H33A 0.9800 . ?
C33 H33B 0.9800 . ?
C33 H33C 0.9800 . ?
C34 H34A 0.9800 . ?
C34 H34B 0.9800 . ?
C34 H34C 0.9800 . ?
C35 H35A 0.9800 . ?
C35 H35B 0.9800 . ?
C35 H35C 0.9800 . ?
C36 H36A 0.9800 . ?
C36 H36B 0.9800 . ?
C36 H36C 0.9800 . ?
C37 C39 1.517(3) . ?
C37 C38 1.526(3) . ?
C37 H37 1.0000 . ?
C38 H38A 0.9800 . ?
C38 H38B 0.9800 . ?
C38 H38C 0.9800 . ?
C39 H39A 0.9800 . ?
C39 H39B 0.9800 . ?
C39 H39C 0.9800 . ?
C41 C42 1.361(3) . ?
C41 C46 1.493(3) . ?
C42 C47 1.488(3) . ?
C43 C45 1.516(3) . ?
C43 C44 1.527(3) . ?
C43 H43 1.0000 . ?
C44 H44A 0.9800 . ?
C44 H44B 0.9800 . ?
C44 H44C 0.9800 . ?
C45 H45A 0.9800 . ?
C45 H45B 0.9800 . ?
C45 H45C 0.9800 . ?
C46 H46A 0.9800 . ?
C46 H46B 0.9800 . ?
C46 H46C 0.9800 . ?
C47 H47A 0.9800 . ?
C47 H47B 0.9800 . ?
C47 H47C 0.9800 . ?
C48 C50 1.515(4) . ?
C48 C49 1.533(3) . ?
C48 H48 1.0000 . ?
C49 H49A 0.9800 . ?
C49 H49B 0.9800 . ?
C49 H49C 0.9800 . ?
C50 H50A 0.9800 . ?
C50 H50B 0.9800 . ?
C50 H50C 0.9800 . ?
C51 C52 1.367(5) . ?
C51 C56 1.382(5) . ?
C51 H51 0.9500 . ?
C52 C53 1.380(5) . ?
C52 H52 0.9500 . ?
C53 C54 1.372(5) . ?
C53 H53 0.9500 . ?
C54 C55 1.377(6) . ?
C54 H54 0.9500 . ?
C55 C56 1.387(5) . ?
C55 H55 0.9500 . ?
C56 H56 0.9500 . ?
 
loop_
 _geom_angle_atom_site_label_1
 _geom_angle_atom_site_label_2
 _geom_angle_atom_site_label_3
 _geom_angle
 _geom_angle_site_symmetry_1
 _geom_angle_site_symmetry_3
 _geom_angle_publ_flag
C40 Si1 C1 105.05(8) . . ?
C40 Si1 C29 100.36(8) . . ?
C1 Si1 C29 121.89(8) . . ?
C29 N1 C30 110.56(16) . . ?
C29 N1 C32 123.80(16) . . ?
C30 N1 C32 124.41(17) . . ?
C29 N2 C31 110.79(16) . . ?
C29 N2 C37 121.70(16) . . ?
C31 N2 C37 125.86(16) . . ?
C40 N3 C41 110.25(18) . . ?
C40 N3 C43 123.05(17) . . ?
C41 N3 C43 126.57(17) . . ?
C40 N4 C42 110.83(18) . . ?
C40 N4 C48 123.37(17) . . ?
C42 N4 C48 125.73(18) . . ?
C2 C1 C12 115.32(16) . . ?
C2 C1 Si1 132.86(14) . . ?
C12 C1 Si1 111.79(13) . . ?
C6 C2 C1 121.17(16) . . ?
C6 C2 C3 109.04(15) . . ?
C1 C2 C3 129.49(16) . . ?
C15 C3 C13 109.78(16) . . ?
C15 C3 C2 113.74(16) . . ?
C13 C3 C2 110.27(15) . . ?
C15 C3 C4 109.70(16) . . ?
C13 C3 C4 110.12(16) . . ?
C2 C3 C4 103.05(15) . . ?
C5 C4 C3 108.63(15) . . ?
C5 C4 H4A 110.0 . . ?
C3 C4 H4A 110.0 . . ?
C5 C4 H4B 110.0 . . ?
C3 C4 H4B 110.0 . . ?
H4A C4 H4B 108.3 . . ?
C6 C5 C17 111.79(16) . . ?
C6 C5 C4 101.36(15) . . ?
C17 C5 C4 111.59(16) . . ?
C6 C5 C19 109.72(16) . . ?
C17 C5 C19 111.60(16) . . ?
C4 C5 C19 110.33(16) . . ?
C7 C6 C2 121.63(17) . . ?
C7 C6 C5 125.11(17) . . ?
C2 C6 C5 113.26(16) . . ?
C8 C7 C6 118.43(17) . . ?
C8 C7 H7 120.8 . . ?
C6 C7 H7 120.8 . . ?
C7 C8 C12 121.68(16) . . ?
C7 C8 C9 123.92(16) . . ?
C12 C8 C9 114.36(15) . . ?
C8 C9 C10 101.29(14) . . ?
C8 C9 C21 112.33(15) . . ?
C10 C9 C21 112.22(15) . . ?
C8 C9 C23 112.50(15) . . ?
C10 C9 C23 109.60(15) . . ?
C21 C9 C23 108.77(15) . . ?
C9 C10 C11 108.84(14) . . ?
C9 C10 H10A 109.9 . . ?
C11 C10 H10A 109.9 . . ?
C9 C10 H10B 109.9 . . ?
C11 C10 H10B 109.9 . . ?
H10A C10 H10B 108.3 . . ?
C27 C11 C25 109.40(15) . . ?
C27 C11 C10 110.66(15) . . ?
C25 C11 C10 107.85(15) . . ?
C27 C11 C12 110.85(14) . . ?
C25 C11 C12 115.22(15) . . ?
C10 C11 C12 102.63(14) . . ?
C8 C12 C1 120.87(16) . . ?
C8 C12 C11 108.12(15) . . ?
C1 C12 C11 130.97(16) . . ?
C14 C13 C3 116.01(17) . . ?
C14 C13 H13A 108.3 . . ?
C3 C13 H13A 108.3 . . ?
C14 C13 H13B 108.3 . . ?
C3 C13 H13B 108.3 . . ?
H13A C13 H13B 107.4 . . ?
C13 C14 H14A 109.5 . . ?
C13 C14 H14B 109.5 . . ?
H14A C14 H14B 109.5 . . ?
C13 C14 H14C 109.5 . . ?
H14A C14 H14C 109.5 . . ?
H14B C14 H14C 109.5 . . ?
C3 C15 C16 114.62(18) . . ?
C3 C15 H15A 108.6 . . ?
C16 C15 H15A 108.6 . . ?
C3 C15 H15B 108.6 . . ?
C16 C15 H15B 108.6 . . ?
H15A C15 H15B 107.6 . . ?
C15 C16 H16A 109.5 . . ?
C15 C16 H16B 109.5 . . ?
H16A C16 H16B 109.5 . . ?
C15 C16 H16C 109.5 . . ?
H16A C16 H16C 109.5 . . ?
H16B C16 H16C 109.5 . . ?
C18 C17 C5 114.23(17) . . ?
C18 C17 H17A 108.7 . . ?
C5 C17 H17A 108.7 . . ?
C18 C17 H17B 108.7 . . ?
C5 C17 H17B 108.7 . . ?
H17A C17 H17B 107.6 . . ?
C17 C18 H18A 109.5 . . ?
C17 C18 H18B 109.5 . . ?
H18A C18 H18B 109.5 . . ?
C17 C18 H18C 109.5 . . ?
H18A C18 H18C 109.5 . . ?
H18B C18 H18C 109.5 . . ?
C20 C19 C5 115.86(17) . . ?
C20 C19 H19A 108.3 . . ?
C5 C19 H19A 108.3 . . ?
C20 C19 H19B 108.3 . . ?
C5 C19 H19B 108.3 . . ?
H19A C19 H19B 107.4 . . ?
C19 C20 H20A 109.5 . . ?
C19 C20 H20B 109.5 . . ?
H20A C20 H20B 109.5 . . ?
C19 C20 H20C 109.5 . . ?
H20A C20 H20C 109.5 . . ?
H20B C20 H20C 109.5 . . ?
C22 C21 C9 116.10(16) . . ?
C22 C21 H21A 108.3 . . ?
C9 C21 H21A 108.3 . . ?
C22 C21 H21B 108.3 . . ?
C9 C21 H21B 108.3 . . ?
H21A C21 H21B 107.4 . . ?
C21 C22 H22A 109.5 . . ?
C21 C22 H22B 109.5 . . ?
H22A C22 H22B 109.5 . . ?
C21 C22 H22C 109.5 . . ?
H22A C22 H22C 109.5 . . ?
H22B C22 H22C 109.5 . . ?
C24 C23 C9 117.55(16) . . ?
C24 C23 H23A 107.9 . . ?
C9 C23 H23A 107.9 . . ?
C24 C23 H23B 107.9 . . ?
C9 C23 H23B 107.9 . . ?
H23A C23 H23B 107.2 . . ?
C23 C24 H24A 109.5 . . ?
C23 C24 H24B 109.5 . . ?
H24A C24 H24B 109.5 . . ?
C23 C24 H24C 109.5 . . ?
H24A C24 H24C 109.5 . . ?
H24B C24 H24C 109.5 . . ?
C26 C25 C11 115.05(16) . . ?
C26 C25 H25A 108.5 . . ?
C11 C25 H25A 108.5 . . ?
C26 C25 H25B 108.5 . . ?
C11 C25 H25B 108.5 . . ?
H25A C25 H25B 107.5 . . ?
C25 C26 H26A 109.5 . . ?
C25 C26 H26B 109.5 . . ?
H26A C26 H26B 109.5 . . ?
C25 C26 H26C 109.5 . . ?
H26A C26 H26C 109.5 . . ?
H26B C26 H26C 109.5 . . ?
C28 C27 C11 115.64(16) . . ?
C28 C27 H27A 108.4 . . ?
C11 C27 H27A 108.4 . . ?
C28 C27 H27B 108.4 . . ?
C11 C27 H27B 108.4 . . ?
H27A C27 H27B 107.4 . . ?
C27 C28 H28A 109.5 . . ?
C27 C28 H28B 109.5 . . ?
H28A C28 H28B 109.5 . . ?
C27 C28 H28C 109.5 . . ?
H28A C28 H28C 109.5 . . ?
H28B C28 H28C 109.5 . . ?
N1 C29 N2 104.94(16) . . ?
N1 C29 Si1 130.94(14) . . ?
N2 C29 Si1 118.77(14) . . ?
C31 C30 N1 106.81(18) . . ?
C31 C30 C35 128.28(19) . . ?
N1 C30 C35 124.72(19) . . ?
C30 C31 N2 106.85(17) . . ?
C30 C31 C36 127.92(19) . . ?
N2 C31 C36 125.16(19) . . ?
N1 C32 C34 114.36(19) . . ?
N1 C32 C33 110.68(19) . . ?
C34 C32 C33 111.07(19) . . ?
N1 C32 H32 106.8 . . ?
C34 C32 H32 106.8 . . ?
C33 C32 H32 106.8 . . ?
C32 C33 H33A 109.5 . . ?
C32 C33 H33B 109.5 . . ?
H33A C33 H33B 109.5 . . ?
C32 C33 H33C 109.5 . . ?
H33A C33 H33C 109.5 . . ?
H33B C33 H33C 109.5 . . ?
C32 C34 H34A 109.5 . . ?
C32 C34 H34B 109.5 . . ?
H34A C34 H34B 109.5 . . ?
C32 C34 H34C 109.5 . . ?
H34A C34 H34C 109.5 . . ?
H34B C34 H34C 109.5 . . ?
C30 C35 H35A 109.5 . . ?
C30 C35 H35B 109.5 . . ?
H35A C35 H35B 109.5 . . ?
C30 C35 H35C 109.5 . . ?
H35A C35 H35C 109.5 . . ?
H35B C35 H35C 109.5 . . ?
C31 C36 H36A 109.5 . . ?
C31 C36 H36B 109.5 . . ?
H36A C36 H36B 109.5 . . ?
C31 C36 H36C 109.5 . . ?
H36A C36 H36C 109.5 . . ?
H36B C36 H36C 109.5 . . ?
N2 C37 C39 110.71(17) . . ?
N2 C37 C38 114.06(16) . . ?
C39 C37 C38 112.77(17) . . ?
N2 C37 H37 106.2 . . ?
C39 C37 H37 106.2 . . ?
C38 C37 H37 106.2 . . ?
C37 C38 H38A 109.5 . . ?
C37 C38 H38B 109.5 . . ?
H38A C38 H38B 109.5 . . ?
C37 C38 H38C 109.5 . . ?
H38A C38 H38C 109.5 . . ?
H38B C38 H38C 109.5 . . ?
C37 C39 H39A 109.5 . . ?
C37 C39 H39B 109.5 . . ?
H39A C39 H39B 109.5 . . ?
C37 C39 H39C 109.5 . . ?
H39A C39 H39C 109.5 . . ?
H39B C39 H39C 109.5 . . ?
N3 C40 N4 105.11(17) . . ?
N3 C40 Si1 132.59(15) . . ?
N4 C40 Si1 118.87(14) . . ?
C42 C41 N3 107.23(18) . . ?
C42 C41 C46 127.2(2) . . ?
N3 C41 C46 125.5(2) . . ?
C41 C42 N4 106.55(19) . . ?
C41 C42 C47 127.7(2) . . ?
N4 C42 C47 125.6(2) . . ?
N3 C43 C45 112.67(18) . . ?
N3 C43 C44 111.92(18) . . ?
C45 C43 C44 112.11(18) . . ?
N3 C43 H43 106.5 . . ?
C45 C43 H43 106.5 . . ?
C44 C43 H43 106.5 . . ?
C43 C44 H44A 109.5 . . ?
C43 C44 H44B 109.5 . . ?
H44A C44 H44B 109.5 . . ?
C43 C44 H44C 109.5 . . ?
H44A C44 H44C 109.5 . . ?
H44B C44 H44C 109.5 . . ?
C43 C45 H45A 109.5 . . ?
C43 C45 H45B 109.5 . . ?
H45A C45 H45B 109.5 . . ?
C43 C45 H45C 109.5 . . ?
H45A C45 H45C 109.5 . . ?
H45B C45 H45C 109.5 . . ?
C41 C46 H46A 109.5 . . ?
C41 C46 H46B 109.5 . . ?
H46A C46 H46B 109.5 . . ?
C41 C46 H46C 109.5 . . ?
H46A C46 H46C 109.5 . . ?
H46B C46 H46C 109.5 . . ?
C42 C47 H47A 109.5 . . ?
C42 C47 H47B 109.5 . . ?
H47A C47 H47B 109.5 . . ?
C42 C47 H47C 109.5 . . ?
H47A C47 H47C 109.5 . . ?
H47B C47 H47C 109.5 . . ?
N4 C48 C50 111.5(2) . . ?
N4 C48 C49 111.70(19) . . ?
C50 C48 C49 113.2(2) . . ?
N4 C48 H48 106.6 . . ?
C50 C48 H48 106.6 . . ?
C49 C48 H48 106.6 . . ?
C48 C49 H49A 109.5 . . ?
C48 C49 H49B 109.5 . . ?
H49A C49 H49B 109.5 . . ?
C48 C49 H49C 109.5 . . ?
H49A C49 H49C 109.5 . . ?
H49B C49 H49C 109.5 . . ?
C48 C50 H50A 109.5 . . ?
C48 C50 H50B 109.5 . . ?
H50A C50 H50B 109.5 . . ?
C48 C50 H50C 109.5 . . ?
H50A C50 H50C 109.5 . . ?
H50B C50 H50C 109.5 . . ?
C52 C51 C56 119.9(3) . . ?
C52 C51 H51 120.1 . . ?
C56 C51 H51 120.1 . . ?
C51 C52 C53 120.8(3) . . ?
C51 C52 H52 119.6 . . ?
C53 C52 H52 119.6 . . ?
C54 C53 C52 119.4(3) . . ?
C54 C53 H53 120.3 . . ?
C52 C53 H53 120.3 . . ?
C53 C54 C55 120.5(3) . . ?
C53 C54 H54 119.8 . . ?
C55 C54 H54 119.8 . . ?
C54 C55 C56 119.9(3) . . ?
C54 C55 H55 120.1 . . ?
C56 C55 H55 120.1 . . ?
C51 C56 C55 119.5(3) . . ?
C51 C56 H56 120.2 . . ?
C55 C56 H56 120.2 . . ?
 
loop_
 _geom_torsion_atom_site_label_1
 _geom_torsion_atom_site_label_2
 _geom_torsion_atom_site_label_3
 _geom_torsion_atom_site_label_4
 _geom_torsion
 _geom_torsion_site_symmetry_1
 _geom_torsion_site_symmetry_2
 _geom_torsion_site_symmetry_3
 _geom_torsion_site_symmetry_4
 _geom_torsion_publ_flag
C12 C1 C2 C6 -10.7(3) . . . . ?
Si1 C1 C2 C6 167.15(15) . . . . ?
C12 C1 C2 C3 162.27(18) . . . . ?
Si1 C1 C2 C3 -19.9(3) . . . . ?
C6 C2 C3 C15 -115.56(18) . . . . ?
C1 C2 C3 C15 70.8(2) . . . . ?
C6 C2 C3 C13 120.63(17) . . . . ?
C1 C2 C3 C13 -53.0(3) . . . . ?
C6 C2 C3 C4 3.1(2) . . . . ?
C1 C2 C3 C4 -170.52(19) . . . . ?
C15 C3 C4 C5 105.83(18) . . . . ?
C13 C3 C4 C5 -133.25(17) . . . . ?
C2 C3 C4 C5 -15.6(2) . . . . ?
C3 C4 C5 C6 21.2(2) . . . . ?
C3 C4 C5 C17 140.32(16) . . . . ?
C3 C4 C5 C19 -95.01(19) . . . . ?
C1 C2 C6 C7 5.0(3) . . . . ?
C3 C2 C6 C7 -169.22(17) . . . . ?
C1 C2 C6 C5 -174.67(16) . . . . ?
C3 C2 C6 C5 11.1(2) . . . . ?
C17 C5 C6 C7 41.2(3) . . . . ?
C4 C5 C6 C7 160.16(19) . . . . ?
C19 C5 C6 C7 -83.2(2) . . . . ?
C17 C5 C6 C2 -139.13(17) . . . . ?
C4 C5 C6 C2 -20.1(2) . . . . ?
C19 C5 C6 C2 96.51(19) . . . . ?
C2 C6 C7 C8 2.7(3) . . . . ?
C5 C6 C7 C8 -177.63(17) . . . . ?
C6 C7 C8 C12 -4.1(3) . . . . ?
C6 C7 C8 C9 173.27(17) . . . . ?
C7 C8 C9 C10 -162.94(18) . . . . ?
C12 C8 C9 C10 14.6(2) . . . . ?
C7 C8 C9 C21 -43.0(2) . . . . ?
C12 C8 C9 C21 134.55(17) . . . . ?
C7 C8 C9 C23 80.1(2) . . . . ?
C12 C8 C9 C23 -102.31(19) . . . . ?
C8 C9 C10 C11 -21.44(19) . . . . ?
C21 C9 C10 C11 -141.45(16) . . . . ?
C23 C9 C10 C11 97.59(17) . . . . ?
C9 C10 C11 C27 -97.54(17) . . . . ?
C9 C10 C11 C25 142.83(15) . . . . ?
C9 C10 C11 C12 20.76(19) . . . . ?
C7 C8 C12 C1 -2.1(3) . . . . ?
C9 C8 C12 C1 -179.73(16) . . . . ?
C7 C8 C12 C11 175.64(16) . . . . ?
C9 C8 C12 C11 -2.0(2) . . . . ?
C2 C1 C12 C8 9.3(2) . . . . ?
Si1 C1 C12 C8 -169.03(14) . . . . ?
C2 C1 C12 C11 -167.91(17) . . . . ?
Si1 C1 C12 C11 13.8(2) . . . . ?
C27 C11 C12 C8 106.70(17) . . . . ?
C25 C11 C12 C8 -128.39(17) . . . . ?
C10 C11 C12 C8 -11.47(18) . . . . ?
C27 C11 C12 C1 -75.8(2) . . . . ?
C25 C11 C12 C1 49.1(3) . . . . ?
C10 C11 C12 C1 165.98(18) . . . . ?
C15 C3 C13 C14 -175.78(17) . . . . ?
C2 C3 C13 C14 -49.7(2) . . . . ?
C4 C3 C13 C14 63.4(2) . . . . ?
C13 C3 C15 C16 -56.5(2) . . . . ?
C2 C3 C15 C16 179.38(18) . . . . ?
C4 C3 C15 C16 64.6(2) . . . . ?
C6 C5 C17 C18 179.54(17) . . . . ?
C4 C5 C17 C18 66.8(2) . . . . ?
C19 C5 C17 C18 -57.2(2) . . . . ?
C6 C5 C19 C20 70.1(2) . . . . ?
C17 C5 C19 C20 -54.4(2) . . . . ?
C4 C5 C19 C20 -179.04(17) . . . . ?
C8 C9 C21 C22 -51.8(2) . . . . ?
C10 C9 C21 C22 61.5(2) . . . . ?
C23 C9 C21 C22 -177.02(17) . . . . ?
C8 C9 C23 C24 -60.3(2) . . . . ?
C10 C9 C23 C24 -172.12(17) . . . . ?
C21 C9 C23 C24 64.8(2) . . . . ?
C27 C11 C25 C26 166.96(16) . . . . ?
C10 C11 C25 C26 -72.6(2) . . . . ?
C12 C11 C25 C26 41.3(2) . . . . ?
C25 C11 C27 C28 56.9(2) . . . . ?
C10 C11 C27 C28 -61.8(2) . . . . ?
C12 C11 C27 C28 -174.98(16) . . . . ?
C30 N1 C29 N2 1.8(2) . . . . ?
C32 N1 C29 N2 -165.98(18) . . . . ?
C30 N1 C29 Si1 -151.21(16) . . . . ?
C32 N1 C29 Si1 41.0(3) . . . . ?
C31 N2 C29 N1 -0.7(2) . . . . ?
C37 N2 C29 N1 -166.92(16) . . . . ?
C31 N2 C29 Si1 156.22(14) . . . . ?
C37 N2 C29 Si1 -10.0(2) . . . . ?
C29 N1 C30 C31 -2.2(2) . . . . ?
C32 N1 C30 C31 165.50(19) . . . . ?
C29 N1 C30 C35 173.2(2) . . . . ?
C32 N1 C30 C35 -19.1(3) . . . . ?
N1 C30 C31 N2 1.6(2) . . . . ?
C35 C30 C31 N2 -173.6(2) . . . . ?
N1 C30 C31 C36 -175.6(2) . . . . ?
C35 C30 C31 C36 9.2(4) . . . . ?
C29 N2 C31 C30 -0.6(2) . . . . ?
C37 N2 C31 C30 164.89(18) . . . . ?
C29 N2 C31 C36 176.8(2) . . . . ?
C37 N2 C31 C36 -17.7(3) . . . . ?
C29 N1 C32 C34 -118.8(2) . . . . ?
C30 N1 C32 C34 75.1(3) . . . . ?
C29 N1 C32 C33 114.8(2) . . . . ?
C30 N1 C32 C33 -51.3(3) . . . . ?
C29 N2 C37 C39 97.7(2) . . . . ?
C31 N2 C37 C39 -66.3(2) . . . . ?
C29 N2 C37 C38 -133.8(2) . . . . ?
C31 N2 C37 C38 62.2(3) . . . . ?
C41 N3 C40 N4 1.3(2) . . . . ?
C43 N3 C40 N4 -174.86(17) . . . . ?
C41 N3 C40 Si1 -156.76(17) . . . . ?
C43 N3 C40 Si1 27.1(3) . . . . ?
C42 N4 C40 N3 -1.5(2) . . . . ?
C48 N4 C40 N3 175.54(18) . . . . ?
C42 N4 C40 Si1 160.16(15) . . . . ?
C48 N4 C40 Si1 -22.8(3) . . . . ?
C40 N3 C41 C42 -0.6(2) . . . . ?
C43 N3 C41 C42 175.38(19) . . . . ?
C40 N3 C41 C46 177.6(2) . . . . ?
C43 N3 C41 C46 -6.4(3) . . . . ?
N3 C41 C42 N4 -0.3(2) . . . . ?
C46 C41 C42 N4 -178.5(2) . . . . ?
N3 C41 C42 C47 174.4(2) . . . . ?
C46 C41 C42 C47 -3.7(4) . . . . ?
C40 N4 C42 C41 1.2(2) . . . . ?
C48 N4 C42 C41 -175.8(2) . . . . ?
C40 N4 C42 C47 -173.7(2) . . . . ?
C48 N4 C42 C47 9.3(3) . . . . ?
C40 N3 C43 C45 -123.1(2) . . . . ?
C41 N3 C43 C45 61.4(3) . . . . ?
C40 N3 C43 C44 109.5(2) . . . . ?
C41 N3 C43 C44 -66.0(3) . . . . ?
C40 N4 C48 C50 111.9(2) . . . . ?
C42 N4 C48 C50 -71.5(3) . . . . ?
C40 N4 C48 C49 -120.3(2) . . . . ?
C42 N4 C48 C49 56.3(3) . . . . ?
C56 C51 C52 C53 1.1(4) . . . . ?
C51 C52 C53 C54 0.0(5) . . . . ?
C52 C53 C54 C55 -0.5(6) . . . . ?
C53 C54 C55 C56 0.0(6) . . . . ?
C52 C51 C56 C55 -1.6(5) . . . . ?
C54 C55 C56 C51 1.1(5) . . . . ?
 
_refine_diff_density_max    1.692
_refine_diff_density_min   -0.755
_refine_diff_density_rms    0.077

_shelx_res_file
;
TITL EindSiImiPr2Me2_2_Br
    shelxl.res
    created by SHELXL-2017/1 at 11:37:37 on 01-Dec-2017
CELL  0.71073 10.65480 12.01490 21.73660 80.51990 82.34300 72.81600
ZERR  2 0.00030 0.00020 0.00050 0.00180 0.00200 0.00200
LATT 1
SFAC C H BR N SI
UNIT 112 182 2 8 2
L.S. 20
FMAP 2
PLAN 20
WPDB -2
HTAB
BOND $H
CONF
LIST 4
TEMP -173.0
ACTA
SIZE 0.363 0.145 0.121
WGHT    0.065800    3.273200
FVAR       0.49239
BR1   3    0.109499   -0.268698    0.056978    11.00000    0.03057    0.02300 =
         0.02613   -0.00455   -0.00217    0.00214
SI1   5    0.363565    0.069015    0.259755    11.00000    0.01409    0.01369 =
         0.01307   -0.00154   -0.00106   -0.00135
N1    4    0.587171    0.053358    0.156639    11.00000    0.01654    0.01447 =
         0.01593   -0.00193    0.00083   -0.00111
N2    4    0.633670   -0.067975    0.241616    11.00000    0.01602    0.01283 =
         0.01738   -0.00067   -0.00098   -0.00249
N3    4    0.181069    0.246402    0.171307    11.00000    0.01626    0.01855 =
         0.01579    0.00135   -0.00221   -0.00146
N4    4    0.225216    0.064219    0.156279    11.00000    0.02025    0.02238 =
         0.01373   -0.00343   -0.00219   -0.00216
C1    1    0.304910    0.185607    0.317735    11.00000    0.01165    0.01012 =
         0.01136   -0.00023   -0.00115   -0.00147
C2    1    0.357453    0.275480    0.330265    11.00000    0.01066    0.01137 =
         0.01465   -0.00008   -0.00037   -0.00305
C3    1    0.499198    0.287921    0.315651    11.00000    0.01003    0.01537 =
         0.01918   -0.00356    0.00030   -0.00395
C4    1    0.495524    0.391424    0.351448    11.00000    0.01367    0.01742 =
         0.02691   -0.00677    0.00197   -0.00730
AFIX  23
H4A   2    0.542247    0.360659    0.389809    11.00000   -1.20000
H4B   2    0.540027    0.446064    0.324616    11.00000   -1.20000
AFIX   0
C5    1    0.350224    0.456667    0.368932    11.00000    0.01364    0.01224 =
         0.02008   -0.00371    0.00211   -0.00597
C6    1    0.282299    0.363498    0.365888    11.00000    0.01286    0.01085 =
         0.01636   -0.00145   -0.00062   -0.00413
C7    1    0.158060    0.362343    0.394510    11.00000    0.01220    0.01180 =
         0.01635   -0.00293    0.00113   -0.00323
AFIX  43
H7    2    0.106567    0.424306    0.417051    11.00000   -1.20000
AFIX   0
C8    1    0.111004    0.268771    0.389423    11.00000    0.01039    0.01216 =
         0.01251    0.00009   -0.00015   -0.00347
C9    1   -0.015979    0.249727    0.423872    11.00000    0.01036    0.01366 =
         0.01344   -0.00129    0.00211   -0.00363
C10   1    0.002972    0.119815    0.418190    11.00000    0.01591    0.01452 =
         0.01567   -0.00095    0.00275   -0.00738
AFIX  23
H10A  2   -0.081982    0.107961    0.411400    11.00000   -1.20000
H10B  2    0.034023    0.070025    0.457288    11.00000   -1.20000
AFIX   0
C11   1    0.106489    0.084534    0.361900    11.00000    0.01326    0.01119 =
         0.01297   -0.00030    0.00017   -0.00557
C12   1    0.181839    0.180121    0.353027    11.00000    0.01118    0.01116 =
         0.01079    0.00072   -0.00172   -0.00351
C13   1    0.599886    0.174367    0.342160    11.00000    0.01367    0.01813 =
         0.02691   -0.00605   -0.00476   -0.00184
AFIX  23
H13A  2    0.606255    0.112374    0.316067    11.00000   -1.20000
H13B  2    0.687455    0.189181    0.337759    11.00000   -1.20000
AFIX   0
C14   1    0.569831    0.127332    0.410306    11.00000    0.02770    0.02589 =
         0.02855    0.00349   -0.01134   -0.00694
AFIX 137
H14A  2    0.569510    0.185371    0.437201    11.00000   -1.50000
H14B  2    0.637474    0.053943    0.421929    11.00000   -1.50000
H14C  2    0.483174    0.112423    0.415626    11.00000   -1.50000
AFIX   0
C15   1    0.537457    0.318874    0.245485    11.00000    0.01422    0.02375 =
         0.02053   -0.00242    0.00422   -0.00762
AFIX  23
H15A  2    0.473583    0.393139    0.229661    11.00000   -1.20000
H15B  2    0.529646    0.256467    0.222865    11.00000   -1.20000
AFIX   0
C16   1    0.677848    0.333008    0.229908    11.00000    0.01992    0.04649 =
         0.02991   -0.00464    0.00653   -0.01739
AFIX 137
H16A  2    0.692925    0.382545    0.258161    11.00000   -1.50000
H16B  2    0.687368    0.369893    0.186497    11.00000   -1.50000
H16C  2    0.742487    0.255568    0.235166    11.00000   -1.50000
AFIX   0
C17   1    0.330374    0.493400    0.434921    11.00000    0.01955    0.01727 =
         0.02255   -0.00663    0.00151   -0.00865
AFIX  23
H17A  2    0.234634    0.523954    0.446586    11.00000   -1.20000
H17B  2    0.364837    0.422863    0.465080    11.00000   -1.20000
AFIX   0
C18   1    0.397727    0.586735    0.441070    11.00000    0.02675    0.02183 =
         0.03119   -0.00954   -0.00075   -0.01182
AFIX 137
H18A  2    0.491871    0.559258    0.427428    11.00000   -1.50000
H18B  2    0.386959    0.600735    0.484876    11.00000   -1.50000
H18C  2    0.357494    0.659996    0.414844    11.00000   -1.50000
AFIX   0
C19   1    0.301249    0.563446    0.318871    11.00000    0.01979    0.01441 =
         0.02471   -0.00049    0.00238   -0.00666
AFIX  23
H19A  2    0.359762    0.615101    0.315374    11.00000   -1.20000
H19B  2    0.310674    0.534439    0.277956    11.00000   -1.20000
AFIX   0
C20   1    0.158755    0.637507    0.330971    11.00000    0.02353    0.01379 =
         0.03651    0.00007    0.00034   -0.00278
AFIX 137
H20A  2    0.099910    0.586644    0.337756    11.00000   -1.50000
H20B  2    0.134463    0.697122    0.294701    11.00000   -1.50000
H20C  2    0.150575    0.676217    0.368211    11.00000   -1.50000
AFIX   0
C21   1   -0.032558    0.272531    0.492757    11.00000    0.01521    0.01996 =
         0.01410   -0.00391    0.00357   -0.00534
AFIX  23
H21A  2   -0.049844    0.358002    0.493274    11.00000   -1.20000
H21B  2   -0.111566    0.250131    0.513730    11.00000   -1.20000
AFIX   0
C22   1    0.083623    0.208234    0.531207    11.00000    0.02222    0.03023 =
         0.01513   -0.00310   -0.00101   -0.00515
AFIX 137
H22A  2    0.097043    0.123252    0.534528    11.00000   -1.50000
H22B  2    0.065104    0.232279    0.573191    11.00000   -1.50000
H22C  2    0.163383    0.227851    0.510610    11.00000   -1.50000
AFIX   0
C23   1   -0.139976    0.327089    0.391462    11.00000    0.01168    0.02056 =
         0.02113   -0.00215   -0.00128   -0.00469
AFIX  23
H23A  2   -0.133347    0.304344    0.349139    11.00000   -1.20000
H23B  2   -0.218189    0.307439    0.415332    11.00000   -1.20000
AFIX   0
C24   1   -0.165393    0.460119    0.384471    11.00000    0.01805    0.01950 =
         0.02983    0.00002   -0.00412   -0.00045
AFIX 137
H24A  2   -0.176649    0.485316    0.425995    11.00000   -1.50000
H24B  2   -0.245559    0.498461    0.363097    11.00000   -1.50000
H24C  2   -0.090301    0.482056    0.359830    11.00000   -1.50000
AFIX   0
C25   1    0.191316   -0.043442    0.380159    11.00000    0.02122    0.01068 =
         0.01720    0.00068   -0.00069   -0.00530
AFIX  23
H25A  2    0.131396   -0.092645    0.396947    11.00000   -1.20000
H25B  2    0.241196   -0.073923    0.341777    11.00000   -1.20000
AFIX   0
C26   1    0.288583   -0.057612    0.428263    11.00000    0.02513    0.01565 =
         0.02240    0.00251   -0.00634   -0.00307
AFIX 137
H26A  2    0.355126   -0.017026    0.410335    11.00000   -1.50000
H26B  2    0.331921   -0.141313    0.439729    11.00000   -1.50000
H26C  2    0.241254   -0.023611    0.465660    11.00000   -1.50000
AFIX   0
C27   1    0.037101    0.090609    0.302679    11.00000    0.01547    0.01652 =
         0.01586   -0.00292   -0.00097   -0.00690
AFIX  23
H27A  2   -0.018040    0.172231    0.292252    11.00000   -1.20000
H27B  2    0.105532    0.072793    0.267343    11.00000   -1.20000
AFIX   0
C28   1   -0.050031    0.007750    0.307851    11.00000    0.01634    0.01911 =
         0.02782   -0.00823   -0.00095   -0.00709
AFIX 137
H28A  2    0.004368   -0.073904    0.315011    11.00000   -1.50000
H28B  2   -0.092287    0.020489    0.268919    11.00000   -1.50000
H28C  2   -0.117909    0.023663    0.342930    11.00000   -1.50000
AFIX   0
C29   1    0.542102    0.030934    0.218059    11.00000    0.01697    0.01325 =
         0.01697   -0.00148   -0.00154   -0.00342
C30   1    0.703400   -0.032791    0.141743    11.00000    0.01800    0.01877 =
         0.02070   -0.00537    0.00196   -0.00213
C31   1    0.733552   -0.107583    0.195400    11.00000    0.01639    0.01599 =
         0.02228   -0.00487    0.00113   -0.00113
C32   1    0.536057    0.166191    0.116151    11.00000    0.02743    0.01650 =
         0.01750    0.00412    0.00367   -0.00189
AFIX  13
H32   2    0.464998    0.217350    0.142319    11.00000   -1.20000
AFIX   0
C33   1    0.644305    0.229931    0.096786    11.00000    0.04076    0.02440 =
         0.03495   -0.00149    0.01598   -0.01361
AFIX 137
H33A  2    0.705012    0.209763    0.129636    11.00000   -1.50000
H33B  2    0.603537    0.315061    0.090927    11.00000   -1.50000
H33C  2    0.693127    0.205455    0.057496    11.00000   -1.50000
AFIX   0
C34   1    0.473936    0.154884    0.059338    11.00000    0.02992    0.03671 =
         0.01691    0.00081    0.00005    0.00021
AFIX 137
H34A  2    0.536667    0.096481    0.035397    11.00000   -1.50000
H34B  2    0.451112    0.231044    0.032842    11.00000   -1.50000
H34C  2    0.393956    0.129831    0.073124    11.00000   -1.50000
AFIX   0
C35   1    0.771428   -0.042639    0.077225    11.00000    0.02656    0.02976 =
         0.02145   -0.00518    0.00323    0.00100
AFIX 137
H35A  2    0.856662   -0.102654    0.079497    11.00000   -1.50000
H35B  2    0.785597    0.033206    0.058617    11.00000   -1.50000
H35C  2    0.716579   -0.064919    0.051308    11.00000   -1.50000
AFIX   0
C36   1    0.852982   -0.209874    0.205467    11.00000    0.02209    0.02275 =
         0.02869   -0.00297   -0.00030    0.00453
AFIX 137
H36A  2    0.905588   -0.222591    0.165366    11.00000   -1.50000
H36B  2    0.825502   -0.280426    0.223043    11.00000   -1.50000
H36C  2    0.906071   -0.193597    0.234586    11.00000   -1.50000
AFIX   0
C37   1    0.607550   -0.135617    0.302958    11.00000    0.01599    0.01408 =
         0.01964    0.00285   -0.00321   -0.00483
AFIX  13
H37   2    0.531159   -0.082380    0.325450    11.00000   -1.20000
AFIX   0
C38   1    0.720684   -0.169296    0.344868    11.00000    0.02451    0.02273 =
         0.02421    0.00305   -0.00911   -0.00698
AFIX 137
H38A  2    0.791952   -0.233720    0.329325    11.00000   -1.50000
H38B  2    0.688948   -0.194575    0.387792    11.00000   -1.50000
H38C  2    0.753790   -0.101215    0.344396    11.00000   -1.50000
AFIX   0
C39   1    0.562379   -0.240147    0.294357    11.00000    0.02939    0.02005 =
         0.03190    0.00334   -0.00806   -0.01112
AFIX 137
H39A  2    0.487905   -0.213417    0.268391    11.00000   -1.50000
H39B  2    0.534851   -0.277796    0.335344    11.00000   -1.50000
H39C  2    0.635205   -0.296737    0.273780    11.00000   -1.50000
AFIX   0
C40   1    0.262087    0.137060    0.188069    11.00000    0.01749    0.01879 =
         0.01291   -0.00107    0.00082   -0.00159
C41   1    0.093040    0.240920    0.130664    11.00000    0.01977    0.02670 =
         0.01774    0.00146   -0.00395   -0.00298
C42   1    0.120465    0.126511    0.121430    11.00000    0.02089    0.02841 =
         0.01601   -0.00003   -0.00350   -0.00368
C43   1    0.194686    0.353950    0.191220    11.00000    0.02430    0.01561 =
         0.02016    0.00205   -0.00407   -0.00232
AFIX  13
H43   2    0.263739    0.327464    0.221581    11.00000   -1.20000
AFIX   0
C44   1    0.245301    0.431837    0.136729    11.00000    0.03136    0.02043 =
         0.02865    0.00704   -0.00168   -0.00507
AFIX 137
H44A  2    0.321205    0.383588    0.113279    11.00000   -1.50000
H44B  2    0.272064    0.491945    0.152989    11.00000   -1.50000
H44C  2    0.175114    0.469959    0.108953    11.00000   -1.50000
AFIX   0
C45   1    0.069725    0.421422    0.226008    11.00000    0.03334    0.02278 =
         0.02470   -0.00295   -0.00022   -0.00111
AFIX 137
H45A  2    0.001647    0.456479    0.196812    11.00000   -1.50000
H45B  2    0.088027    0.483685    0.244291    11.00000   -1.50000
H45C  2    0.038710    0.367723    0.259412    11.00000   -1.50000
AFIX   0
C46   1   -0.013610    0.342367    0.104414    11.00000    0.02312    0.02971 =
         0.02865    0.00310   -0.00879   -0.00014
AFIX 137
H46A  2   -0.039506    0.323764    0.066566    11.00000   -1.50000
H46B  2    0.018690    0.412166    0.093907    11.00000   -1.50000
H46C  2   -0.090039    0.357779    0.135535    11.00000   -1.50000
AFIX   0
C47   1    0.046530    0.074300    0.086119    11.00000    0.03330    0.03499 =
         0.03218   -0.00558   -0.01388   -0.00673
AFIX 137
H47A  2   -0.022720    0.049532    0.114446    11.00000   -1.50000
H47B  2    0.107218    0.006049    0.068553    11.00000   -1.50000
H47C  2    0.006405    0.132939    0.052107    11.00000   -1.50000
AFIX   0
C48   1    0.294457   -0.062648    0.157336    11.00000    0.03176    0.02186 =
         0.02056   -0.00675   -0.00581   -0.00089
AFIX  13
H48   2    0.372255   -0.078834    0.181956    11.00000   -1.20000
AFIX   0
C49   1    0.349052   -0.093650    0.091523    11.00000    0.04554    0.03171 =
         0.03003   -0.01264    0.00934   -0.00916
AFIX 137
H49A  2    0.333953   -0.021635    0.061489    11.00000   -1.50000
H49B  2    0.304191   -0.146506    0.079878    11.00000   -1.50000
H49C  2    0.443920   -0.132630    0.091122    11.00000   -1.50000
AFIX   0
C50   1    0.209151   -0.138353    0.191680    11.00000    0.05445    0.02369 =
         0.02831   -0.00555    0.00868   -0.00815
AFIX 137
H50A  2    0.185123   -0.120448    0.234804    11.00000   -1.50000
H50B  2    0.258188   -0.221475    0.192105    11.00000   -1.50000
H50C  2    0.128955   -0.122112    0.170350    11.00000   -1.50000
AFIX   0
C51   1    0.667596    0.523905    0.033683    11.00000    0.06230    0.02906 =
         0.03502    0.00100   -0.00549   -0.01221
AFIX  43
H51   2    0.671156    0.473912    0.003497    11.00000   -1.20000
AFIX   0
C52   1    0.771091    0.568472    0.035335    11.00000    0.03913    0.04081 =
         0.03586    0.00703   -0.00373   -0.00111
AFIX  43
H52   2    0.845717    0.550200    0.005693    11.00000   -1.20000
AFIX   0
C53   1    0.768492    0.639657    0.079521    11.00000    0.04453    0.04522 =
         0.06267   -0.00419   -0.02096   -0.01031
AFIX  43
H53   2    0.840823    0.670234    0.080361    11.00000   -1.20000
AFIX   0
C54   1    0.660533    0.665867    0.122216    11.00000    0.07635    0.04628 =
         0.06247   -0.02542   -0.00306   -0.01276
AFIX  43
H54   2    0.658504    0.714334    0.152943    11.00000   -1.20000
AFIX   0
C55   1    0.555098    0.622447    0.120864    11.00000    0.05885    0.03649 =
         0.06588   -0.01051    0.01957    0.00031
AFIX  43
H55   2    0.480645    0.640879    0.150587    11.00000   -1.20000
AFIX   0
C56   1    0.557791    0.551727    0.076013    11.00000    0.04954    0.03089 =
         0.06696    0.00463   -0.00094   -0.01635
AFIX  43
H56   2    0.484684    0.522622    0.074403    11.00000   -1.20000
AFIX   0
HKLF 4


REM  EindSiImiPr2Me2_2_Br
REM R1 =  0.0491 for   11386 Fo > 4sig(Fo)  and  0.0623 for all   13761 data
REM    579 parameters refined using      0 restraints

END

WGHT      0.0658      3.2732

REM Instructions for potential hydrogen bonds
HTAB C34 N4
EQIV $1 x+1, y, z
HTAB C35 Br1_$1
HTAB C36 Br1_$1
EQIV $2 x, y+1, z
HTAB C44 Br1_$2
EQIV $3 -x, -y, -z
HTAB C46 Br1_$3
HTAB C47 Br1_$3
HTAB C49 Br1

REM Highest difference peak  1.692,  deepest hole -0.755,  1-sigma level  0.077
Q1    1   0.4222  0.1084  0.2467  11.00000  0.05    1.69
Q2    1   0.0446 -0.2685  0.0391  11.00000  0.05    1.63
Q3    1   0.9510 -0.2730  0.1005  11.00000  0.05    1.16
Q4    1   0.4530  0.1838  0.1120  11.00000  0.05    0.62
Q5    1   0.2539  0.2799  0.1427  11.00000  0.05    0.56
Q6    1   0.0989 -0.2635  0.0993  11.00000  0.05    0.55
Q7    1  -0.0177  0.2600  0.4596  11.00000  0.05    0.54
Q8    1  -0.0039  0.0492  0.3077  11.00000  0.05    0.53
Q9    1   0.3146  0.3175  0.3474  11.00000  0.05    0.51
Q10   1   0.8213  0.5901 -0.0417  11.00000  0.05    0.50
Q11   1   0.3579  0.1952  0.1659  11.00000  0.05    0.49
Q12   1   0.5244  0.3043  0.2818  11.00000  0.05    0.48
Q13   1   0.5019 -0.1380  0.2476  11.00000  0.05    0.48
Q14   1   0.0252  0.2438  0.5122  11.00000  0.05    0.48
Q15   1   0.0553  0.2611  0.4077  11.00000  0.05    0.48
Q16   1   0.1409  0.3221  0.1845  11.00000  0.05    0.48
Q17   1   0.2424 -0.0047  0.1546  11.00000  0.05    0.47
Q18   1   0.1340  0.4386  0.2002  11.00000  0.05    0.47
Q19   1   0.4084 -0.0451  0.2295  11.00000  0.05    0.46
Q20   1   0.2449 -0.0879  0.1785  11.00000  0.05    0.46
;
_shelx_res_checksum   59390

_shelx_hkl_file
;
   0   1  -2 6583.26  210.92
   0  -1   2 6123.07  210.91
   0   0   3  516.19   17.57
   0   0   3  493.66   17.56
  -1   0   2 1124.45   39.03
   1  -1   0  722.36   27.15
  -1   1   0  857.37   27.18
   0   1   3  649.41   22.60
   1  -1  -1  406.73   14.10
  -1   1   1  405.08   14.16
  -1   1   1  407.33   14.10
  -1   1   1  399.95   14.12
  -1   1  -1  655.32   22.81
  -1  -1   2 2894.72   96.07
  -1  -1   2 2675.58   96.05
   1   1   3  343.80   13.30
  -1  -1  -3  392.75   13.19
  -1   0  -3  800.31   26.99
  -1   0  -3  767.27   27.00
   1   0   3  759.36   27.00
   1   2   1   48.13    1.96
  -1  -2  -1   49.58    1.98
   1   2   1   45.73    1.80
  -1  -2  -1   50.57    1.79
  -1   1   2  133.70    4.60
  -1   1   2  135.58    4.68
  -1   1   2  119.48    4.71
   1  -1  -2  135.04    4.70
   1  -1  -2  125.71    4.59
   0   1  -3  633.91   21.95
   0  -1   3  631.70   21.94
   0   1  -3  624.82   21.94
   0  -2   0  490.99   17.32
   0   2   0  502.97   17.33
   0  -2  -1   26.86    1.46
   0   2   1   34.23    1.50
   0   2   1   36.47    1.63
   0   2   1   31.40    1.58
   0  -2  -1   42.74    1.50
   0  -2  -1   35.48    1.63
  -1  -2   0 3500.64  112.71
   1   2   0 3284.76  112.75
   1   2   0 3255.09  112.65
  -1  -2   0 3179.42  112.65
  -1  -2   0 3095.50  112.71
   1  -1   2 2607.57   90.69
  -1   1  -2 2627.61   90.69
  -1   0   3  242.39    7.89
   1   0  -3  217.49    7.87
  -1   0   3  209.27    7.97
   1   2   2 1191.69   42.76
  -1  -2  -2 1232.72   42.75
   1   2   2 1222.36   42.83
  -1  -2  -2 1351.86   42.85
   0   0   4 6265.57  210.20
   0   0   4 6339.88  210.21
   0  -2   1  393.46   13.98
   0   2  -1  407.32   14.01
   0  -2  -2 1358.05   46.78
   0   2   2 1390.13   46.78
   0   2   2 1399.32   46.81
   0   2   2 1258.00   46.77
   1   2  -1  129.37    4.66
  -1  -2   1  128.61    4.66
  -1  -2   1  133.91    4.76
  -2  -1  -1  504.80   18.10
   2   1   1  532.87   18.05
   2   1   1  526.17   18.10
  -2  -1  -1  522.67   18.09
   2   1   1  492.27   18.15
  -2  -1  -1  517.99   18.18
  -2  -1   0   78.37    2.71
  -2  -1   0   69.12    2.91
   2   1   0   71.76    2.60
   2   1   0   74.82    2.84
   2   1   0   66.37    2.72
   2   1   0   68.60    2.65
  -2  -1   0   67.34    2.59
   2   1   0   68.03    2.66
  -1  -1   3  996.28   34.65
   0   1   4 1225.27   41.44
   0  -1  -4 1216.85   41.42
   0  -1  -4 1136.74   41.43
  -2   0   0   76.13    2.76
  -2   0   0   86.48    2.91
   2   0   0   76.18    2.89
   2   0   0   75.77    2.79
  -2   0   0   82.04    2.81
   2   0   0   69.43    2.74
   2   0   1 3607.60  126.83
  -2   0  -1 3858.04  126.89
  -2   0  -1 3587.53  126.83
   2   0   1 3713.04  126.88
   1   1   4 1450.52   49.51
  -1  -1  -4 1410.98   49.40
  -2  -1  -2 2988.16  103.12
  -2  -1  -2 3086.70  103.20
  -2  -1  -2 2887.26  103.26
  -2  -1  -2 3057.03  103.21
   2   1   2 3031.65  103.21
   2   1   2 2894.55  103.12
   1  -1  -3  145.14    5.57
   1  -1  -3  159.70    5.43
  -1   1   3  147.43    5.43
  -1   1   3  160.18    5.57
  -1   0  -4    7.22    1.05
  -1   0  -4    3.41    0.89
   1   0   4    5.11    0.95
   1   0   4    5.62    1.02
   1   0   4    6.46    1.05
   1   2   3 1442.92   51.66
  -1  -2  -3 1532.78   51.66
   2   1  -1 1518.24   52.63
  -2  -1   1 1508.00   52.64
   2   1  -1 1461.39   52.61
   2   1  -1 1552.35   52.55
  -2  -1   1 1462.73   52.55
  -2  -1   1 1521.78   52.61
  -2  -1   1 1461.67   52.69
  -2  -1   1 1635.02   52.61
   2   0  -1 1639.67   52.31
  -2   0   1 1540.06   52.22
   2   0  -1 1579.64   52.22
   2   0  -1 1479.64   52.23
  -1   1  -3   10.64    1.06
   1  -1   3    9.62    1.29
   1  -1   3   11.75    0.91
  -1   1  -3   14.42    0.91
   0  -2   2    9.34    1.07
   0  -2   2    7.54    1.00
   0   2  -2    7.19    1.10
   0  -2  -3 1590.73   58.75
   0   2   3 1751.44   58.76
   0  -2  -3 1741.32   58.75
  -2   0  -2 1079.49   36.78
   2   0   2 1048.51   36.78
  -2   0  -2 1051.92   36.74
   1   2  -2 3224.40  114.94
  -1  -2   2 3305.46  114.95
  -1  -2   2 3455.02  114.99
   0   1  -4 1211.67   41.65
   0  -1   4 1234.38   41.62
   0   1  -4 1146.56   41.63
   1   0  -4  314.54   10.74
  -1   0   4  292.60   10.83
   2   1   3  958.10   33.72
  -2  -1  -3 1027.19   33.84
  -2  -1  -3 1008.33   33.83
  -2  -1  -3  959.44   33.72
  -2  -1  -3  947.48   33.88
  -2  -2  -1   34.10    1.48
   2   2   1   39.28    1.53
  -2  -2  -1   32.67    1.59
  -2  -2  -1   35.27    1.69
   2   2   1   35.74    1.69
  -2  -2  -1   25.66    2.06
   2   2   1   32.70    1.47
  -1   2   0  656.78   23.02
  -1   2   0  638.98   23.11
   1  -2   0  672.92   23.09
   1  -2   0  669.99   23.02
  -1   2   0  667.01   23.10
  -2  -2   0 4134.55  147.47
  -2  -2   0 4247.49  147.55
   2   2   0 4360.11  147.46
   2   2   0 4372.97  147.52
  -2  -2   0 4329.26  147.52
   2   2   0 4219.84  147.47
   2   2   0 4189.07  147.45
   2   0  -2 4826.70  168.65
  -2   0   2 4845.85  168.65
  -2   0   2 4864.28  168.69
   2   0  -2 4959.21  168.69
  -1   2   1  319.31   13.08
  -1   2   1  380.87   13.04
   1  -2  -1  401.38   13.02
   2   1  -2  164.21    5.60
   2   1  -2  143.21    5.70
  -2  -1   2  161.83    5.86
  -2  -1   2  159.28    5.59
  -2  -1   2  155.42    5.71
  -2  -1   2  157.65    5.69
   2   1  -2  159.61    5.73
  -2  -2  -2 4235.27  146.31
  -2  -2  -2 4265.29  146.33
   2   2   2 4182.06  146.30
  -2  -2  -2 4238.47  146.24
   2   2   2 4197.23  146.25
   2   0   3  103.85    3.69
   2   0   3  102.90    3.70
  -2   0  -3   95.30    3.71
  -1   2  -1 1486.66   49.16
   1  -2   1 1435.10   49.16
  -1   2  -1 1386.54   49.24
   1  -2   1 1299.74   49.23
  -1  -2  -4  719.77   26.37
  -1  -2  -4  799.36   26.38
  -1  -2  -4  748.03   26.41
   0   0  -5  196.11    7.18
   0   0   5  215.62    7.16
   0   0   5  190.79    7.16
   0   0  -5  197.08    7.17
   1   1  -4 1140.18   39.57
  -2   1   0    7.41    1.02
   2  -1   0    8.93    0.97
  -2   1   0    7.65    1.17
   1  -1  -4   57.85    2.72
   1  -1  -4   66.10    2.45
  -1   1   4   63.99    2.71
  -1   1   4   64.61    2.46
   1  -2  -2 5418.48  175.99
  -1   2   2 5417.38  175.99
  -1   2   2 4934.27  176.05
  -2  -2   1  269.46   10.61
   2   2  -1  266.98   10.49
  -2  -2   1  305.47   10.54
  -2  -2   1  349.76   10.69
   2   2  -1  346.55   10.63
   0   1   5 1571.56   54.66
   0   1   5 1575.60   54.63
   0  -2   3  509.13   17.61
   0  -2   3  490.21   17.61
   0   2  -3  510.58   17.62
   0  -2  -4 2106.96   74.72
   0   2   4 2198.66   74.72
   1   1   5    3.13    1.35
  -1  -1  -5    6.52    1.01
  -2   1  -1  391.06   13.67
  -2   1  -1  379.31   13.71
   2  -1   1  398.80   13.68
   1  -1   4 3942.75  135.07
  -1   1  -4 3951.21  135.07
  -1   1  -4 3895.19  135.10
  -1   1  -4 3723.56  135.16
   1  -1   4 3911.00  135.16
  -2  -2  -3   20.09    1.47
  -2  -2  -3   20.02    1.43
   2   2   3   24.58    1.22
  -2  -2  -3   25.62    1.23
   2   2   3   18.04    1.45
  -2   1   1 1054.78   35.73
   2  -1  -1  965.99   35.65
  -2   1   1 1003.16   35.75
   2  -1  -1 1022.85   35.63
  -2   1   1 1082.65   35.63
   2  -1  -1 1018.62   35.71
  -1  -2   3  220.91    8.08
  -1  -2   3  236.45    8.11
  -1  -2   3  220.92    8.13
   1   0   5  924.55   32.81
   1   0   5  944.85   32.80
   1   0   5  946.21   32.85
  -1   0  -5  924.41   32.80
  -1   0  -5  979.12   32.84
  -2  -1  -4 1187.17   43.05
   2   1   4 1297.56   42.95
  -2  -1  -4 1206.62   42.95
  -1   2  -2 3917.60  133.19
   1  -2   2 3833.39  133.11
  -1   2  -2 3805.14  133.11
   1   3   1 3414.92  123.00
   1   3   1 3701.18  123.03
   1   3   1 3395.66  122.98
  -1  -3  -1 3764.91  122.99
  -1  -3  -1 3610.98  122.90
   1   3   1 3640.33  122.91
   1   3   1 3224.17  122.99
   2   0  -3 1357.64   47.06
   2   0  -3 1360.43   47.10
  -2   0   3 1389.59   47.14
  -2   0   3 1320.34   47.10
   2  -1   2  404.91   13.14
  -2   1  -2  386.40   13.11
   2  -1   2  336.58   13.13
  -2   1  -2  366.89   13.14
  -1  -3   0   62.95    2.48
  -1  -3   0   59.58    2.32
   1   3   0   67.65    2.71
   1   3   0   54.90    2.28
   1   3   0   54.94    2.49
   1   3   0   54.55    2.57
   1   3   0   54.86    2.53
  -1  -3   0   54.24    2.58
  -2  -1   311576.00  394.95
   2   1  -312120.80  395.01
  -2  -1   312219.90  395.08
   2   1  -310563.20  395.00
  -2  -1   311158.10  394.94
  -2  -1   311195.40  395.01
   1   3   2  264.57   10.33
  -1  -3  -2  294.69   10.19
   1   3   2  302.42   10.36
  -1  -3  -2  281.64   10.32
   1   3   2  299.20   10.21
  -1   2   3 1901.85   62.29
   1  -2  -3 1827.11   62.27
   1  -2  -3 1721.16   62.32
  -1   2   3 1669.29   62.36
   2  -1  -2  760.10   25.52
  -2   1   2  778.24   25.49
   2  -1  -2  788.60   25.58
   2  -1  -2  707.12   25.42
   2  -1  -2  774.38   25.48
  -2   1   2  771.39   25.57
  -2   1   2  667.97   25.43
  -2  -2   2 3665.62  123.75
  -2  -2   2 3582.16  123.69
  -2  -2   2 3601.88  123.74
   2   2  -2 3517.88  123.69
   2   2  -2 3265.27  123.76
   2   2  -2 3645.58  123.70
  -2  -2   2 3690.94  123.79
   2   0   4   49.91    2.08
  -2   0  -4   46.34    2.02
   2   0   4   50.61    2.09
   0  -1   5 3887.99  135.63
   0   1  -5 3961.59  135.65
   0   1  -5 3889.96  135.67
   0   3   1    2.16    1.23
   0   3   1   -0.48    1.09
   0  -3  -1    0.73    1.04
   0  -3  -1    0.19    1.32
   0  -3  -1    0.46    1.09
   0   3   1    1.59    1.40
  -1   0   5   56.70    2.60
   1   0  -5   58.30    2.42
  -1   0   5   63.49    2.39
   0  -3   0  231.35    8.14
   0   3   0  205.18    8.11
   0  -3   0  229.91    8.03
   0  -3   0  227.63    8.04
   0  -3   0  240.69    8.10
   0   3   0  209.68    8.04
   0   3   0  234.91    8.06
  -2  -2  -411652.70  416.95
  -2  -2  -412592.00  416.89
   2   2   411382.10  417.01
  -2  -2  -412143.20  416.95
  -1  -2  -5   69.36    2.71
  -1  -2  -5   62.14    2.89
   1   2   5   57.95    2.77
   1   3  -1  325.55   11.72
  -1  -3   1  331.58   11.61
   1   3  -1  307.90   11.70
  -1  -3   1  324.00   11.70
  -1  -3   1  361.41   11.75
   1   3  -1  330.57   11.60
   0   3   2  307.80   10.73
   0   3   2  303.36   10.77
   0  -3  -2  291.36   10.83
   0   3   2  296.63   10.79
   0  -3  -2  303.80   10.76
   0   3   2  311.30   10.82
   0  -3  -2  318.32   10.81
  -1  -3  -3  293.23    9.94
   1   3   3  274.22    9.96
  -1  -3  -3  270.21    9.80
   1   3   3  283.93    9.81
  -1   2  -3 1497.68   52.66
  -1   2  -3 1509.94   52.57
   1  -2   3 1529.65   52.58
  -2   1  -3  610.30   21.32
   2  -1   3  584.87   21.43
  -2   1  -3  598.37   21.44
  -2   1  -3  629.58   21.43
   2  -1   3  626.77   21.31
   0   2  -4 1762.84   62.79
   0  -2   4 1844.56   62.78
   0  -2   4 1813.77   62.76
   0   2   5  146.02    5.11
   0  -2  -5  143.42    5.15
   0   2   5  121.37    5.28
   0   3  -1  916.93   30.61
   0   3  -1  835.25   30.57
   0  -3   1  876.25   30.58
   0  -3   1  891.29   30.60
  -1   1   5  566.78   19.56
  -1   1   5  549.81   19.66
  -2  -3  -1 4097.98  137.53
  -2  -3  -1 4015.43  137.47
  -2  -3  -1 3864.24  137.39
   2   3   1 3939.26  137.38
  -2  -3  -1 4052.83  137.44
   2   3   1 3985.31  137.48
   2   3   1 3959.80  137.61
   1   1  -5 1344.15   46.67
   2  -1  -3  225.26    7.21
  -2   1   3  205.91    7.06
   2  -1  -3  238.26    7.14
  -2   1   3  221.71    7.10
   2  -1  -3  191.41    6.95
  -2   1   3  176.76    6.94
  -2  -1  -5    2.56    1.39
   2   1   5    3.83    1.39
   2   1   5    2.75    0.91
  -2  -1  -5   -0.32    0.95
   1   2  -4 1025.46   34.74
  -1  -2   4  985.96   34.72
  -1  -2   4  985.63   34.86
  -2  -3  -2 4501.11  157.94
   2   3   2 4633.07  158.05
  -2  -3  -2 4536.03  158.04
  -2  -3  -2 4481.16  158.04
  -2  -3  -2 4570.77  158.11
   2   3   2 4631.92  157.94
   1  -1   5 2202.14   77.12
  -1   1  -5 2196.65   77.20
  -1   1  -5 2190.20   77.13
  -1   1  -5 2302.06   77.13
   1  -1   5 2209.52   77.20
   0   0  -6  677.11   23.21
   0   0  -6  664.39   23.23
   0   0   6  666.13   23.20
   0   0   6  661.21   23.21
   0   0  -6  650.09   23.21
   2   3   0  242.37    8.86
  -2  -3   0  238.61    8.62
   2   3   0  233.03    8.75
   2   3   0  246.22    8.61
   2   3   0  242.29    8.72
  -2  -3   0  251.37    8.80
  -2  -3   0  252.63    8.59
   3   1   1  567.17   19.16
   3   1   1  549.85   19.17
  -3  -1  -1  544.46   19.17
   3   1   1  538.73   19.17
  -3  -1  -1  555.54   19.16
   3   1   1  526.93   19.32
   0   3   3   35.54    1.80
   0   3   3   35.10    1.80
   0   3   3   37.44    1.91
   0  -3  -3   39.13    1.93
   0  -3  -3   31.97    1.74
   1  -2  -4 1771.25   61.22
  -1   2   4 1605.66   61.30
  -1   2   4 1832.15   61.22
   1  -2  -4 1771.97   61.29
  -1   2   4 1799.47   61.32
   1   1   6   20.62    1.72
  -1  -1  -6   27.85    1.49
   1   1   6   20.92    1.77
  -1  -1  -6   23.70    1.83
   1   1   6   19.89    1.69
   0   1   6   63.51    2.57
   0  -1  -6   64.26    2.64
   0   1   6   61.08    2.67
  -2   0   4 3065.10  107.29
   2   0  -4 3063.81  107.20
   2   0  -4 3025.74  107.28
   2   0  -4 3146.98  107.16
   3   1   0 2468.48   86.39
   3   1   0 2453.93   86.51
  -3  -1   0 2447.03   86.36
   3   1   0 2537.45   86.40
   3   1   0 2495.95   86.36
   3   1   0 2522.93   86.40
  -3  -1   0 2503.77   86.34
   2   2  -3    8.15    1.09
  -2  -2   3    6.85    1.38
   2   2  -3    6.84    1.25
   2   2  -3    4.48    1.44
  -2  -2   3    6.25    1.08
  -2  -2   3    7.26    1.46
   1   3  -2  215.99    7.96
  -1  -3   2  210.72    7.96
   1   3  -2  225.78    7.88
  -1  -3   2  225.16    7.89
  -3  -1  -2   73.40    2.82
   3   1   2   73.38    2.70
   3   1   2   69.52    2.82
   3   1   2   53.93    3.06
  -3  -1  -2   71.75    2.72
   3   1   2   73.95    2.88
  -3  -1  -2   74.31    2.82
   2   1  -4  171.14    5.79
   2   1  -4  141.19    5.80
  -2  -1   4  160.65    5.83
  -2  -1   4  157.45    5.82
  -1  -3  -4 5771.81  190.25
  -1  -3  -4 5684.35  190.14
   1   3   4 5257.14  190.24
   1   3   4 5117.96  190.22
   1   0   6  100.81    3.68
  -1   0  -6   92.42    3.60
  -1   0  -6   90.81    3.75
   1   0   6   98.26    3.63
   1   0   6   96.35    3.70
  -1   0  -6   96.88    3.78
   1   0   6   74.22    3.75
  -2  -3  -3  458.40   15.56
  -2  -3  -3  411.10   15.60
  -2  -3  -3  444.98   15.52
   2   3   3  448.74   15.53
   0  -3   2   24.32    1.58
   0  -3   2   24.85    1.63
   0   3  -2   21.89    1.57
  -2   0  -5 1103.43   37.57
  -2   0  -5 1040.01   37.59
   2   0   5 1063.13   37.58
   2   0   5 1110.43   37.58
  -2  -2  -5 1822.08   66.70
  -2  -2  -5 2045.85   66.64
  -2  -2  -5 1898.97   66.55
   2   2   5 1903.14   66.79
   2   3  -1  156.00    6.78
   2   3  -1  183.63    6.65
  -2  -3   1  173.29    6.64
   2   3  -1  195.89    6.51
  -2  -3   1  189.79    6.50
   2   3  -1  172.54    6.59
   3   1  -1  159.86    6.06
  -3  -1   1  169.37    5.95
  -3  -1   1  167.80    5.84
   3   1  -1  173.11    5.98
   3   1  -1  173.87    6.19
   3   1  -1  160.40    5.84
  -3  -1   1  155.91    5.99
   3   2   1  229.66    8.03
   3   2   1  225.32    7.99
   3   2   1  205.56    8.20
   3   2   1  229.94    8.01
  -3  -2  -1  218.72    8.17
  -3  -2  -1  228.00    7.98
  -3  -2  -1  216.37    8.10
  -3   0  -1    7.04    0.84
   3   0   1    5.67    1.13
   3   0   1    5.67    0.77
   3   0   1    3.96    0.60
  -3   0  -1    2.60    1.14
   3   0   0   10.53    1.24
   3   0   0   12.99    0.88
   3   0   0   11.12    0.84
   3   0   0   11.29    0.94
  -3   0   0    9.17    1.38
  -3   0   0   10.82    0.87
   3   0   0    8.29    0.73
  -3   0   0   11.54    0.94
  -3  -2  -2  628.06   21.33
   3   2   2  645.08   21.33
  -3  -2  -2  610.91   21.52
   3   2   2  577.76   21.16
  -3  -2  -2  632.28   21.38
   3   2   2  652.84   21.35
   2  -1   4   28.25    1.90
   2  -1   4   39.16    1.59
  -2   1  -4   37.36    1.62
  -2   1  -4   34.83    1.85
   2  -1   4   28.06    2.23
   2  -2   0  158.04    5.47
  -2   2   0  145.36    5.53
   2  -2   0  142.66    5.48
   3   2   0  483.62   16.70
   3   2   0  473.43   16.73
   3   2   0  472.17   16.82
   3   2   0  493.35   16.78
  -3  -2   0  473.33   16.70
   3   2   0  477.01   16.75
  -3  -2   0  460.79   16.88
   3   1   3  158.80    6.26
   3   1   3  178.12    5.99
  -3  -1  -3  169.06    6.38
  -3  -1  -3  167.08    6.14
   3   1   3  162.31    6.14
   3   1   3  163.81    6.11
  -3  -1  -3  168.06    5.99
   1  -2   4 5063.02  172.21
  -1   2  -4 5002.64  172.21
   1  -2   4 4757.01  172.32
  -2   2   1 1443.35   47.91
  -2   2   1 1305.89   47.72
  -2   2   1 1424.28   47.83
   2  -2  -1 1417.24   47.82
   2  -2  -1 1428.44   47.88
   3   0   2  685.96   23.19
  -3   0  -2  662.81   23.10
  -3   0  -2  646.57   23.17
   0  -3  -4  182.94    6.65
   0   3   4  182.33    6.63
   0  -3  -4  187.96    6.72
   0   3   4  185.05    6.72
   1   2   6 1561.08   55.02
  -1  -2  -6 1582.65   55.06
   1   2   6 1603.92   55.05
   2  -2   1 2714.68   91.50
   2  -2   1 2611.41   91.37
   2  -2   1 2733.98   91.51
  -2   2  -1 2738.95   91.51
  -2   2  -1 2563.93   91.36
   3   0  -1 1234.62   40.75
   3   0  -1 1125.90   40.61
  -3   0   1 1181.22   40.59
   3   0  -1 1167.45   40.64
   3   0  -1 1195.53   40.71
  -3   0   1 1158.09   40.61
   0   1  -6   70.11    3.03
   0   1  -6   70.76    2.97
   0  -1   6   77.14    2.94
   1  -3  -1  882.57   31.41
  -1   3   1  950.40   31.57
  -1   3   1  841.52   31.60
   1  -3  -1  968.24   31.56
   1  -3  -1  872.88   31.55
  -1   3   1  931.78   31.50
  -1   0   6   10.52    1.26
   1   0  -6   12.54    1.32
  -2   1   4  909.15   32.18
   2  -1  -4  970.70   32.33
   2  -1  -4  914.45   32.35
   2  -1  -4  936.14   32.19
  -2   1   4  922.77   32.31
   1  -3   0 2021.12   70.43
  -1   3   0 1962.25   70.52
   1  -3   0 1982.58   70.48
  -1   3   0 2102.38   70.53
  -1   3   0 2030.27   70.42
   1  -3   0 2090.78   70.51
  -2  -3  -4  138.96    4.61
  -2  -3  -4  113.80    4.37
  -2  -3  -4  133.12    4.71
   2   3   4  136.83    4.63
  -3  -2  -3 1196.87   38.33
   3   2   3 1148.42   38.32
   3   2   3 1244.22   38.36
  -3  -2  -3 1186.50   38.39
   3   2  -1  164.75    5.86
  -3  -2   1  147.99    5.83
   3   2  -1  152.77    5.78
  -3  -2   1  169.90    5.85
   3   2  -1  149.71    5.72
   3   2  -1  161.32    5.72
  -3  -2   1  165.49    5.70
  -3  -2   1  145.51    5.93
   0  -2   5 1132.86   38.40
   0   2  -5 1115.93   38.42
   0   2  -5 1100.31   38.43
   0  -2   5 1060.01   38.42
  -3  -1   2 1039.92   34.39
   3   1  -2 1009.77   34.43
  -3  -1   2  921.53   34.28
   3   1  -2 1072.11   34.42
  -3  -1   2 1030.57   34.42
   3   1  -2  956.56   34.28
  -3  -1   2 1033.94   34.56
   3   1  -2 1036.68   34.52
  -1  -3   3 3410.05  118.23
   1   3  -3 3494.96  118.23
  -1  -3   3 3442.82  118.08
  -1  -3   3 3279.01  118.18
   1   3  -3 3397.27  118.16
   0   2   6  691.03   23.67
   0  -2  -6  678.76   23.68
   0  -2  -6  661.18   23.66
   2  -2  -2   92.17    3.05
  -2   2   2  118.95    3.54
   1  -3  -2  226.94    8.59
   1  -3  -2  251.69    8.55
  -1   3   2  253.71    8.58
  -1   3   2  215.66    8.67
  -2  -3   2 1414.15   49.52
  -2  -3   2 1336.56   49.64
   2   3  -2 1439.67   49.58
   2   3  -2 1441.00   49.52
  -2  -3   2 1473.86   49.58
  -1   2   5  885.98   30.94
  -1   2   5  864.72   31.06
   1  -2  -5  906.02   30.95
  -1   3  -1 5452.04  183.47
  -1   3  -1 5522.47  183.57
   1  -3   1 5470.38  183.48
   1  -3   1 4748.11  183.50
   1  -3   1 5384.06  183.55
  -1   3  -1 5191.87  183.58
   2  -2   2  106.26    4.00
  -2   2  -2  106.01    4.00
  -2   2  -2   91.12    3.91
  -2   2  -2  100.41    3.63
   1   3   5 1534.05   55.08
  -1  -3  -5 1594.29   55.09
   1   3   5 1621.23   55.08
   0  -3   3   82.56    3.34
   0  -3   3   82.65    3.35
   0   3  -3   81.11    3.32
  -2  -1  -6   38.06    1.74
   2   1   6   34.79    2.20
   2   1   6   37.36    1.81
   1  -1  -6 6174.60  220.13
  -1   1   6 6618.64  220.21
  -1   1   6 6496.07  220.31
  -3   0  -3 1356.49   46.66
  -3   0  -3 1289.64   46.59
   3   0   3 1410.60   46.66
  -1  -2   5  242.47    9.42
  -1  -2   5  274.01    9.24
   1   2  -5  259.94    9.27
  -2  -2   4    4.77    1.50
   2   2  -4    8.49    1.38
  -2  -2   4    4.81    1.28
  -2  -2   4    8.14    1.56
   3   0  -2  140.26    5.08
  -3   0   2  136.03    4.93
   3   0  -2  138.16    4.91
   3   0  -2  124.58    4.94
   3   1   4 3037.84  103.95
   3   1   4 3010.15  103.83
   3   1   4 2950.73  103.93
  -3  -1  -4 2903.66  103.94
  -3  -1  -4 2871.25  104.05
  -3  -1  -4 3077.71  103.84
  -2   0   5 2405.72   82.73
  -2   0   5 2395.09   82.82
   2   0  -5 2338.99   82.82
   2   0  -5 2386.17   82.69
   1  -1   6   -2.93    1.45
  -1   1  -6    2.62    1.40
  -1   1  -6    3.44    1.43
   1  -1   6    1.89    1.44
   1  -1   6    1.34    1.38
  -1   1  -6    4.21    1.60
   1   1  -6 1481.71   51.47
  -2  -1   5 2147.04   76.51
  -2  -1   5 2179.20   76.47
  -2  -1   5 2241.80   76.38
   3   2   4  671.08   24.22
  -3  -2  -4  730.55   24.28
   3   2   4  701.86   24.46
  -3  -2  -4  728.61   24.51
   3   2   4  751.45   24.47
  -3  -2  -4  711.29   24.42
  -3  -2  -4  752.01   24.45
  -3  -2  -4  675.23   24.22
   1  -3  -3   94.55    3.95
   1  -3  -3  110.68    3.86
  -1   3   3   81.41    4.00
  -1   3   3  110.42    3.91
  -1   3   3   90.09    4.05
   1  -3  -3  106.25    3.76
   2   2   6   84.27    3.73
  -2  -2  -6   88.15    3.28
   1   1   7 1510.36   51.28
  -1  -1  -7 1533.84   51.24
   1   1   7 1340.34   51.30
  -1  -1  -7 1514.60   51.37
   1   1   7 1456.96   51.30
  -2   2   3 2669.29   92.11
  -2   2   3 2714.36   92.05
  -2   2   3 2572.14   92.19
   2  -2  -3 2613.73   92.18
   2  -2  -3 2648.06   92.04
  -1   3  -2 7288.88  246.49
  -1   3  -2 7205.83  246.59
   1  -3   2 6723.41  246.59
   1  -3   2 7137.83  246.50
   0   0  -7 1452.79   48.22
   0   0  -7 1267.72   48.25
   0   0  -7 1440.14   48.24
   0   0   7 1372.40   48.21
  -3  -2   2 4903.57  170.79
   3   2  -2 4960.54  170.67
  -3  -2   2 4759.79  170.67
   3   2  -2 5083.12  170.72
  -3  -2   2 4956.77  170.66
   3   2  -2 4765.19  170.59
  -3  -2   2 4768.09  170.68
  -3  -2   2 5165.67  170.59
   0   1   7 3714.31  129.04
   0  -1  -7 3683.15  129.04
   0   1   7 3804.53  129.01
   0  -1  -7 3662.10  129.06
   2   0   6 4699.51  163.17
  -2   0  -6 4885.09  163.16
   2   0   6 4410.65  163.27
  -2   0  -6 4630.98  163.20
   2   0   6 4791.48  163.17
   0  -3  -5  975.19   35.29
   0   3   5 1047.36   35.31
   0  -3  -5 1016.87   35.29
   2  -1   5 3171.79  107.17
   2  -1   5 3131.61  106.98
  -2   1  -5 3151.49  107.00
  -2   1  -5 2716.48  107.16
   2  -1   5 3091.14  107.05
  -2   1  -5 3121.61  107.05
  -2  -3  -5  378.89   13.15
  -2  -3  -5  332.92   13.25
  -2  -3  -5  370.65   13.08
   2   3   5  384.49   13.08
  -3   1   0   87.05    3.36
  -3   1   0   82.01    3.47
   3  -1   0   78.72    3.45
   3  -1   0   92.03    3.34
   3   3   1  169.12    5.87
   3   3   1  167.00    6.21
  -3  -3  -1  164.98    6.14
  -3  -3  -1  149.85    6.04
   3   3   1  170.43    5.97
  -3  -3  -1  162.84    6.37
   3   3   1  166.54    6.12
   3   3   1  170.45    5.99
   2  -2   3 4017.89  138.43
  -2   2  -3 3993.50  138.42
  -2   2  -3 3966.67  138.56
  -2   2  -3 3978.28  138.56
   3  -1   1  147.23    6.06
  -3   1  -1  167.14    6.08
   3  -1   1  179.50    6.00
  -3   1  -1  162.45    5.97
   3   3   2   13.85    1.29
   3   3   2   14.26    1.58
  -3  -3  -2   12.69    1.17
   3   3   2   14.51    1.17
  -3  -3  -2   14.00    2.00
  -3  -3  -2   15.74    1.54
  -3  -3  -2   12.40    1.46
  -1  -4  -1  351.77   11.83
  -1  -4  -1  325.15   11.78
  -1  -4  -1  327.94   11.77
   1   4   1  316.42   11.63
   1   4   1  330.07   11.76
  -1  -4  -1  336.43   11.62
   1   4   1  314.50   11.76
   1   4   1  330.57   11.78
   1   4   1  339.16   11.81
  -3  -1   3  467.21   16.84
   3   1  -3  487.68   16.70
  -3  -1   3  512.21   16.73
   3   1  -3  489.23   16.72
  -3  -1   3  461.81   16.54
   3   1  -3  461.88   16.66
   1   0   7 2178.98   75.74
  -1   0  -7 2176.41   75.78
  -1   0  -7 2217.71   75.73
   1   0   7 2153.29   75.78
  -1   0  -7 2155.57   75.78
   1   0   7 2157.25   75.75
   1   0   7 2217.55   75.77
  -1   2  -5  977.95   34.15
   1  -2   5 1006.29   34.15
   1  -2   5  946.39   34.24
   1   4   2 1514.86   49.63
  -1  -4  -2 1398.78   49.60
   1   4   2 1367.09   49.58
   1   4   2 1379.80   49.60
  -1  -4  -2 1482.11   49.48
   1   4   2 1394.34   49.49
  -3   0  -4  637.74   21.80
   3   0   4  615.92   21.74
   3   0   4  627.98   21.88
   3   0   4  618.33   21.79
   3   3   0  592.00   20.65
  -3  -3   0  606.38   20.76
   3   3   0  588.48   20.65
  -3  -3   0  555.23   20.51
  -3  -3   0  595.70   20.61
   3   3   0  579.99   20.48
   3   3   0  604.22   20.48
   3   3   0  577.18   20.52
   3   3   0  612.10   20.61
   3  -1  -1 1420.92   49.16
  -3   1   1 1400.98   49.06
   3  -1  -1 1402.17   49.07
   3  -1  -1 1468.58   49.07
  -3   1   1 1419.19   49.18
  -3   1   1 1385.27   49.23
   3  -1  -1 1367.72   49.21
  -2  -3   3   36.98    2.32
  -2  -3   3   33.74    1.94
  -2  -3   3   37.78    1.90
   2   3  -3   35.82    2.08
  -2  -3   3   24.54    2.13
   2   3  -3   33.42    1.92
   1   4   0 2188.78   75.92
  -1  -4   0 2056.18   76.00
  -1  -4   0 2150.14   76.04
   1   4   0 2265.80   76.05
  -1  -4   0 2229.39   76.03
   1   4   0 2185.50   76.02
  -1  -4   0 2235.79   75.92
  -1  -4   0 2272.56   76.02
   1   4   0 2094.83   76.00
   2  -1  -5  454.56   15.70
  -2   1   5  437.85   15.51
  -2   1   5  450.62   15.67
   3   0  -3  274.41    9.69
  -3   0   3  266.70    9.79
  -3   0   3  274.55    9.68
   3  -1   2 1744.44   57.71
  -3   1  -2 1632.95   57.65
  -3   1  -2 1646.43   57.71
   3  -1   2 1634.18   57.65
  -3  -3  -3 2381.52   83.07
  -3  -3  -3 2425.83   83.05
   3   3   3 2403.83   83.07
   3   3   3 2374.47   83.03
   3   3   3 2344.52   82.95
  -3  -3  -3 2427.22   82.94
  -1  -3   4  138.53    5.36
   1   3  -4  141.91    5.27
   1   3  -4  132.02    5.21
  -1  -3   4  140.29    4.99
  -1  -3   4  137.44    5.23
   1   2   7 1106.97   37.95
   1   2   7 1151.14   37.96
  -1  -2  -7 1091.92   37.97
  -1  -2  -7 1007.42   37.93
   3   1   5  694.22   25.34
   3   1   5  741.95   25.21
   3   1   5  712.74   25.35
  -3  -1  -5  725.33   25.36
  -3  -1  -5  648.59   25.45
  -3  -1  -5  757.03   25.22
   0  -3   4  157.72    6.05
   0   3  -4  169.35    6.04
   0  -3   4  161.79    6.06
   0  -3   4  162.58    6.08
   1   4   3  581.96   20.11
   1   4   3  501.02   20.23
   1   4   3  596.35   20.26
   1   4   3  555.96   20.27
  -1  -4  -3  594.33   20.09
  -1  -4  -3  602.74   20.24
  -1  -3  -6   20.84    1.80
   1   3   6   22.87    1.80
  -1  -3  -6   17.52    1.89
  -1  -3  -6   18.13    1.90
  -1   3   4  530.79   18.02
   1  -3  -4  508.85   17.98
   1  -3  -4  496.97   18.04
  -2  -4  -1   95.09    3.47
   2   4   1   81.94    3.69
  -2  -4  -1   77.33    3.61
  -2  -4  -1   67.84    3.14
   2   4   1   93.09    3.80
   2   4   1   88.04    3.18
   2   4   1   94.09    3.52
  -2  -4  -2 3238.83  121.88
   2   4   2 3582.11  121.86
  -2  -4  -2 3543.46  121.72
   2   4   2 3461.04  121.95
  -2  -4  -2 3480.50  121.85
   2   4   2 3622.16  121.72
   2   4   2 3434.88  121.94
  -3  -2  -5  229.12    8.32
  -3  -2  -5  223.08    8.03
   3   2   5  219.99    8.35
  -3  -2  -5  227.99    8.42
  -3  -2  -5  228.95    8.33
   3   2   5  230.86    8.35
   3   2   5  236.81    8.04
   1  -3   3 2371.21   80.16
  -1   3  -3 2267.15   80.15
  -1   3  -3 2286.92   80.25
   1  -2  -6  100.13    3.95
  -1   2   6  103.72    3.90
  -1   2   6  102.50    4.17
  -1  -4   1   22.53    2.04
  -1  -4   1   30.35    2.13
  -1  -4   1   25.98    1.71
   1   4  -1   22.89    2.06
   1   4  -1   32.08    1.68
  -1  -4   1   25.73    2.06
   1   4  -1   29.89    2.03
   1   4  -1   30.93    2.06
  -3  -3   1    4.92    1.39
   3   3  -1    5.32    0.80
   3   3  -1    5.07    1.56
   3   3  -1    9.86    1.86
  -3  -3   1    5.88    1.67
   3   3  -1    5.19    1.53
   3   3  -1    6.52    1.17
   3   3  -1    5.38    1.34
  -3   1   2  972.57   32.49
   3  -1  -2  955.89   32.48
   3  -1  -2 1024.64   32.41
  -3   1   2  994.71   32.39
   3  -1  -2  848.12   32.30
   3  -1  -2  974.34   32.44
   3  -1  -2  886.81   32.50
   0  -4  -1   72.34    3.03
   0   4   1   69.94    3.04
   0  -4  -1   67.12    3.21
   0  -4  -1   82.70    3.25
   0   4   1   78.45    3.11
   0   4   1   72.96    3.22
   0  -4  -1   70.48    3.04
  -2   2   4 2634.54   90.15
  -2   2   4 2399.26   90.00
   2  -2  -4 2585.10   90.04
  -2   2   4 2845.31   90.06
  -2   2   4 2637.50   90.21
   2  -2  -4 2658.17   90.21
   0   1  -7  731.43   24.30
   0  -1   7  772.06   24.28
   0   1  -7  627.37   24.33
   0   1  -7  712.37   24.36
   0  -1   7  611.17   24.32
   0   2  -6 1234.30   43.88
   0  -2   6 1291.12   43.89
   0   2  -6 1241.54   43.86
   0  -2   6 1270.75   43.83
  -1   0   7    1.36    1.24
   1   0  -7    2.57    1.39
  -3  -2   3 1836.62   64.40
  -3  -2   3 1888.33   64.31
  -3  -2   3 1841.25   64.27
   3   2  -3 1855.14   64.30
   3   2  -3 1892.41   64.33
   3   2  -3 1730.16   64.21
  -3  -2   3 1923.81   64.20
   0   2   7  345.84   12.17
   0  -2  -7  334.28   12.16
   0  -2  -7  345.94   12.14
   0  -4   0   13.88    1.54
   0   4   0   16.27    1.94
   0  -4   0   14.45    1.73
   0  -4   0   16.04    1.51
   0   4   0   16.07    1.58
   0   4   0   17.50    1.66
   0  -4   0   16.95    1.93
   0   4   2 2548.73   87.97
   0  -4  -2 2541.17   88.05
   0   4   2 2451.61   88.01
   0   4   2 2571.50   88.08
   0  -4  -2 2587.31   88.08
   0  -4  -2 2533.68   88.00
  -2  -4   0 1172.45   40.31
   2   4   0 1194.13   40.19
  -2  -4   0 1185.12   40.08
  -2  -4   0 1115.16   40.18
   2   4   0 1191.89   40.30
   2   4   0 1183.30   40.06
   2   4   0 1001.36   40.18
  -2  -4   0 1154.04   40.23
  -2  -2   5   20.52    1.68
  -2  -2   5   17.93    1.71
   2   2  -5   18.90    1.07
   2   2  -5   19.21    1.69
   2   1   7   42.15    1.97
  -2  -1  -7   40.43    1.95
   2   1   7   39.71    2.40
  -3   1  -3   19.75    1.65
   3  -1   3   25.15    1.75
  -3   1  -3   18.38    1.54
  -2  -4  -3 1303.51   46.34
   2   4   3 1318.65   46.20
   2   4   3 1336.95   46.36
  -2  -4  -3 1350.96   46.19
  -3  -3  -4  550.77   19.30
   3   3   4  538.80   19.12
   3   3   4  551.54   19.28
  -3  -3  -4  549.05   19.27
  -3  -3  -4  553.25   19.12
   3   3   4  542.81   19.25
  -2   2  -4  886.77   31.47
   2  -2   4  911.25   31.35
  -2   2  -4  884.03   31.48
  -2   2  -4  895.68   31.34
   2  -2   4  934.94   31.63
  -2   0   6    6.13    1.53
   2   0  -6    5.20    1.09
   2   0  -6    8.99    1.71
  -2   0   6    8.46    1.15
  -1  -2   6  339.95   11.34
   1   2  -6  327.20   11.36
   1   2  -6  277.10   11.52
  -1   1   7  693.51   24.35
  -1   1   7  715.93   24.22
   1  -1  -7  669.18   24.22
  -1  -4  -4   90.19    3.42
   1   4   4   89.93    3.72
   1   4   4   93.27    3.69
   1   4   4   84.12    3.43
   1   4   4   79.39    3.78
  -1  -4  -4   93.63    3.72
  -2  -3  -6    5.50    1.54
  -2  -3  -6    7.67    2.12
  -2  -3  -6    5.70    1.76
   0   3   6 2156.86   73.62
   0  -3  -6 1994.14   73.68
   0  -3  -6 2184.98   73.63
   3   0   5 5409.83  189.70
  -3   0  -5 5546.74  189.74
   3   0   5 5531.41  189.74
   3   0   5 5405.10  189.83
  -3  -1   4 1127.85   39.27
   3   1  -4 1143.81   39.27
  -3  -1   4 1104.68   39.10
   3   1  -4 1139.04   39.23
  -3  -1   4 1159.56   39.36
   0  -4   1  559.10   19.83
   0   4  -1  536.26   19.97
   0   4  -1  564.98   19.86
   0  -4   1  596.01   19.95
   0   4  -1  559.70   19.88
   0  -4   1  575.24   19.88
   0   4   3 1866.76   63.88
   0  -4  -3 1829.41   63.89
   0   4   3 1907.38   63.94
   0  -4  -3 1870.41   63.92
   0  -4  -3 1838.25   63.86
   0   4   3 1754.06   63.81
   0   4   3 1850.95   63.87
  -2  -2  -7    9.85    1.20
   2   2   7    8.39    2.15
   2   2   7   10.11    1.88
  -1   1  -7   32.93    2.08
  -1   1  -7   38.94    2.12
   1  -1   7   38.62    2.17
   1  -1   7   31.89    2.10
   1  -1   7   31.71    2.06
  -1   1  -7   40.46    2.29
  -2   1  -6   24.80    1.64
  -2   1  -6   27.14    2.27
   2  -1   6   21.07    1.52
   2  -1   6   24.49    2.27
  -2   1  -6   23.18    1.79
   2  -1   6   25.34    1.82
  -2  -4   1   77.48    3.31
   2   4  -1   82.84    3.18
   2   4  -1   74.05    3.29
   2   4  -1   70.72    2.92
  -2  -4   1   64.34    2.92
  -2  -4   1   65.40    3.27
  -2  -1   6  130.67    4.58
  -2  -1   6  120.27    4.87
  -2  -1   6  117.92    4.73
  -3   0   4 4066.34  141.52
  -3   0   4 4222.07  141.59
   3   0  -4 4095.98  141.53
   3   0  -4 3999.94  141.47
  -1  -4   2 1600.29   51.42
   1   4  -2 1537.30   51.39
  -1  -4   2 1356.72   51.37
   1   4  -2 1309.45   51.34
   1   4  -2 1504.55   51.28
  -1  -4   2 1542.02   51.30
   1   1  -7 1917.79   66.87
  -1  -1   7 1935.11   66.91
  -3  -3   2  207.83    7.47
   3   3  -2  190.14    7.09
   3   3  -2  205.50    7.49
  -3  -3   2  218.70    7.37
   3   3  -2  210.41    7.37
   3   3  -2  214.29    7.30
  -3  -3   2  201.97    7.48
   3   3  -2  209.33    7.60
  -3   1   3   26.47    1.57
   3  -1  -3   22.28    1.63
   3  -1  -3   23.97    1.80
  -2  -3   4  187.15    6.67
   2   3  -4  173.53    6.63
  -2  -3   4  180.43    6.76
   2   4   4  111.76    4.42
  -2  -4  -4  107.73    4.40
  -2  -4  -4  107.50    4.39
  -2  -4  -4  116.09    4.08
  -2   0  -7   20.70    1.90
   2   0   7   16.54    1.72
  -2   0  -7   19.15    1.52
   2   0   7   15.68    1.94
   2   0   7   17.65    1.60
   1  -3  -5 3067.32  106.32
   1  -3  -5 2970.89  106.27
  -1   3   5 3156.25  106.28
  -1   2  -6 3208.13  111.28
  -1   2  -6 3332.39  111.39
   1  -2   6 3255.86  111.27
  -1   2  -6 3025.01  111.30
   1  -2   6 3249.35  111.35
   2  -3   0  620.30   21.46
  -2   3   0  602.30   21.45
   2  -3   0  607.30   21.39
   1   1   8 3178.51  114.44
   1   1   8 3370.98  114.42
  -1  -1  -8 3465.32  114.37
  -1  -1  -8 2995.96  114.39
  -1  -1  -8 3241.26  114.41
  -1  -1  -8 3387.38  114.49
   1   1   8 3437.42  114.41
  -2   3   1    7.60    1.50
  -2   3   1   12.26    1.04
  -2   3   1    9.57    1.78
   2  -3  -1    5.56    1.70
   2  -3  -1    7.98    1.44
  -3  -1  -6   83.29    3.44
  -3  -1  -6   77.54    2.87
   3   1   6   73.63    2.87
   3   1   6   67.90    3.19
   3   1   6   66.26    3.23
   3   1   6   60.90    3.25
   1  -3   4  527.75   18.91
  -1   3  -4  551.16   18.89
  -1   3  -4  534.13   19.04
  -2   1   6   21.47    1.39
  -2   1   6   28.74    1.93
   2  -1  -6   26.97    2.03
   3  -1   4   77.54    2.91
   3  -1   4   85.43    3.31
  -3   1  -4   83.02    3.24
  -3   1  -4   76.98    3.27
   0  -1  -8  175.56    6.36
   0   1   8  173.75    6.21
   0  -1  -8  163.04    6.33
   0   1   8  163.78    6.28
   3   3   5   13.62    1.87
  -3  -3  -5    8.71    1.86
   3   3   5   14.76    1.72
  -3  -3  -5   16.66    1.33
  -3  -3  -5    8.41    1.73
  -1  -3   5  449.72   15.10
  -1  -3   5  396.29   15.03
   1   3  -5  404.03   14.98
  -1  -3   5  432.34   14.82
   1   3  -5  430.30   15.04
  -3  -2  -6  545.57   20.43
   3   2   6  598.15   20.13
   3   2   6  562.05   20.53
  -3  -2  -6  596.55   20.36
  -3  -2  -6  596.85   20.12
   3   2   6  509.84   20.34
  -3  -2  -6  557.15   20.32
   0   0  -8 1038.06   36.11
   0   0  -8 1070.24   36.09
   0   0  -8  992.47   36.15
   0   0   8 1028.29   36.09
   0  -3   5  324.19   11.26
   0   3  -5  324.51   11.25
   0  -3   5  312.18   11.19
   0  -3   5  296.09   11.25
   0   4  -2  197.68    7.17
   0  -4   2  190.19    7.19
   0  -4   2  196.13    7.18
   0   4  -2  198.17    7.21
   0   4   4 1123.67   39.34
   0  -4  -4 1120.17   39.37
   0  -4  -4 1083.54   39.31
   0   4   4 1136.88   39.31
   0   4   4 1196.11   39.41
  -2   3  -1 1050.71   36.92
   2  -3   1 1070.94   36.90
   2  -3   1 1050.61   36.76
   2  -3   1 1084.41   36.93
  -2   3  -1 1047.23   36.75
  -2   2   5  891.91   30.41
   2  -2  -5  900.11   30.41
   2  -2  -5  834.64   30.59
  -2   2   5  833.99   30.55
   2  -2  -5  863.79   30.62
   4   1   1   23.30    1.47
   4   1   1   27.99    2.20
   4   1   1   22.63    1.51
   4   1   1   29.78    1.55
   4   1   1   20.90    1.42
   4   1   1   32.02    1.59
  -1  -4  -5  248.60    8.69
   1   4   5  255.80    8.84
  -1  -4  -5  214.48    8.82
  -1  -4  -5  242.14    8.89
   1   4   5  253.41    8.93
  -2   3   2  697.86   24.19
   2  -3  -2  694.22   24.06
   2  -3  -2  655.84   24.17
  -2   3   2  698.76   24.08
  -3  -2   4  800.15   27.38
  -3  -2   4  764.66   27.24
  -3  -2   4  782.66   27.50
   3   2  -4  804.91   27.39
   3   2  -4  801.28   27.38
  -3  -2   4  756.24   27.30
  -1   0  -8  810.27   29.23
  -1   0  -8  848.02   29.17
   1   0   8  830.09   29.19
   1   0   8  827.84   29.22
  -1   0  -8  816.70   29.24
   1   0   8  866.14   29.21
  -1  -3  -7  167.46    6.75
  -1  -3  -7  175.64    6.76
   1   3   7  183.49    6.71
  -1  -3  -7  190.54    6.80
   4   1   2   23.11    1.46
   4   1   2   21.56    1.52
   4   1   2   18.92    1.37
   4   1   2   25.74    1.68
  -4  -1  -2   27.25    1.56
   4   1   2   19.36    2.06
   4   1   0   66.43    2.42
   4   1   0   62.32    2.26
   4   1   0   62.37    2.50
   4   1   0   46.94    2.16
   4   1   0   56.15    2.35
   4   2   1  853.32   29.12
   4   2   1  830.84   29.14
   4   2   1  832.62   29.14
   4   2   1  831.88   29.21
   4   2   1  835.38   29.06
  -4  -2  -1  822.62   29.12
  -4  -2  -1  837.91   29.07
   4   2   1  825.25   29.34
  -2  -4   2  548.33   19.53
  -2  -4   2  588.33   19.65
   2   4  -2  541.26   19.66
   2   4  -2  558.45   19.53
   2   4  -2  565.75   19.64
  -2  -4   2  537.81   19.72
   4   2   2  546.99   19.09
   4   2   2  550.05   19.20
  -4  -2  -2  546.41   19.09
  -4  -2  -2  544.16   19.06
   4   2   2  535.11   19.33
   4   2   2  541.15   18.97
   2  -2   5  121.46    4.36
  -2   2  -5  121.37    4.37
   2  -2   5  125.45    4.86
   2  -2   5  100.83    4.56
  -2   2  -5  108.95    4.57
   1   2   8 1221.17   39.13
   1   2   8 1152.53   39.12
   3  -2   0 2680.08   88.24
  -3   2   0 2639.39   88.25
  -3   2   0 2417.80   88.06
  -3   2   0 2597.38   88.29
   3  -2   0 2654.76   88.19
   4   2   0    9.21    1.50
   4   2   0    7.45    1.80
   4   2   0    6.53    1.49
  -4  -2   0    7.81    1.23
   4   2   0   -1.94    2.22
   4   2   0    8.66    1.20
  -4  -2   0    6.43    1.04
   4   2   0    5.95    1.67
   3   4   2  107.35    4.07
  -3  -4  -2  102.60    4.30
   3   4   2   99.59    3.78
  -3  -4  -2  117.43    4.06
   3   4   2  108.24    4.34
  -3  -4  -2  101.12    4.02
  -3  -4  -2  107.09    3.80
   3   4   2  120.50    4.65
   3   4   1  112.68    3.99
   3   4   1  103.90    4.37
   3   4   1  101.82    4.22
   3   4   1  109.13    4.66
  -3  -4  -1  114.97    4.35
  -3  -4  -1  108.45    4.22
  -3  -4  -1  111.57    4.01
  -3  -4  -1  106.54    4.10
   1  -2  -7  681.21   24.01
  -1   2   7  677.46   24.16
  -1   2   7  701.64   24.00
   1  -2  -7  675.30   24.19
  -2  -4  -5 1366.52   46.89
  -2  -4  -5 1324.66   46.88
  -2  -4  -5 1336.35   46.71
   2   4   5 1371.48   46.91
  -1  -4   3 1312.38   45.71
   1   4  -3 1272.14   45.71
  -1  -4   3 1310.37   45.64
   1   4  -3 1345.32   45.63
  -1  -4   3 1301.50   45.73
  -3   2  -1  471.84   16.45
   3  -2   1  452.22   16.43
  -3   2  -1  465.64   16.40
   3  -2   1  469.72   16.40
   2  -3   2   84.49    3.35
  -2   3  -2   87.87    3.72
   2  -3   2   88.02    3.66
  -2   3  -2   86.31    3.30
   2  -3   2   83.21    3.64
  -3   2   1   30.20    2.22
   3  -2  -1   24.11    1.57
  -3   2   1   36.25    2.20
   3  -2  -1   44.26    2.14
  -3   2   1   21.65    1.40
   3   3  -3 3358.41  113.62
  -3  -3   3 3239.60  113.68
  -3  -3   3 3281.13  113.59
   3   3  -3 2939.44  113.65
   3   3  -3 3472.53  113.72
   3   3  -3 3327.34  113.58
  -3  -3   3 3313.61  113.67
   4   1   3  355.77   12.52
   4   1   3  354.09   12.60
   4   1   3  351.86   12.83
   4   1   3  361.58   12.64
  -4  -1  -3  354.93   12.54
   3  -1  -4   64.59    2.57
  -3   1   4   52.21    2.58
  -3   1   4   54.65    2.51
   3  -1  -4   50.15    2.68
   4   1  -1  607.13   21.77
   4   1  -1  600.05   21.81
   4   1  -1  642.62   22.06
   4   1  -1  643.95   21.90
   4   1  -1  633.93   21.94
  -4  -1   1  622.78   21.78
   4   1  -1  653.06   22.11
  -4  -1   1  657.17   21.88
  -4  -1   1  630.26   21.90
   4   2   3    1.64    1.76
  -4  -2  -3    3.72    1.44
  -4  -2  -3    3.52    1.96
  -4  -2  -3    3.45    1.49
   4   2   3    4.68    2.06
   4   2   3    3.52    0.89
   4   2   3    4.14    1.54
   1  -4  -1   57.62    2.29
  -1   4   1   53.74    2.62
   1  -4  -1   50.09    2.66
  -1   4   1   59.73    2.55
  -1   4   1   53.54    2.75
   1  -4  -1   56.10    2.68
  -1   4   1   43.01    2.88
   3   0   6 2217.81   73.30
   3   0   6 2063.10   73.27
   3   0   6 2043.98   73.40
  -3   0  -6 2106.45   73.29
  -3  -4  -3 2281.42   80.87
   3   4   3 2359.67   80.86
  -3  -4  -3 2309.68   80.96
   3   4   3 2303.78   80.95
  -3  -4  -3 2374.19   80.85
  -2  -3  -7  165.94    6.53
  -2  -3  -7  170.87    6.29
  -2  -3  -7  166.53    6.47
   2   2  -6   30.33    2.23
  -2  -2   6   37.90    2.26
   2   2  -6   35.48    1.65
  -2   3   3  259.54    8.78
   2  -3  -3  263.55    8.76
   2  -3  -3  184.88    8.87
  -2   3   3  246.35    9.00
   2  -3  -3  258.62    8.95
   1  -4   0  189.74    6.32
  -1   4   0  173.14    6.37
  -1   4   0  165.24    6.14
  -1   4   0  176.26    6.36
  -1   4   0  136.94    6.21
   1  -4   0  168.18    6.24
   3   4   0   43.43    1.91
  -3  -4   0   46.37    1.91
   3   4   0   40.00    2.65
   3   4   0   41.51    2.26
   3   4   0   43.52    2.41
  -3  -4   0   37.91    2.36
  -3  -1   5  320.87   11.18
  -3  -1   5  312.68   11.41
   3   1  -5  304.02   11.39
  -3  -1   5  324.59   11.53
   3   1  -5  322.90   11.31
   0   2  -7 2204.17   76.84
   0  -2   7 2236.76   76.84
   0  -2   7 2190.85   76.76
   0   2  -7 2217.01   76.81
   0   2   8   22.00    1.93
   0  -2  -8   26.94    1.93
   0  -2  -8   27.46    1.84
   0   3   7    3.78    2.36
   0  -3  -7    6.36    1.79
   0  -3  -7    6.48    2.00
   0   3   7    9.69    1.64
   1  -4  -2  165.06    6.03
  -1   4   2  173.08    6.02
   1  -4  -2  155.79    6.08
  -1   4   2  141.19    6.21
  -1   4   2  165.87    6.12
   1  -4  -2  163.77    6.11
  -1   4   2  166.81    6.12
   4   0   1  599.59   19.93
   4   0   1  581.93   19.84
  -4   0  -1  567.64   19.89
   4   0   1  582.52   20.00
   4   0   1  532.93   19.84
   4   0   1  566.28   19.88
  -4   0  -1  592.16   20.04
  -3   0   5  173.16    6.21
  -3   0   5  172.40    6.11
  -3   0   5  152.00    5.73
   3   0  -5  168.39    5.81
   3   0  -5  170.20    5.90
   3   0  -5  161.49    5.74
   3   0  -5  180.71    6.14
   2   1   8  277.06   10.25
  -2  -1  -8  293.46   10.11
   2   1   8  272.42   10.29
  -4  -2   1  272.38   10.27
   4   2  -1  282.29   10.60
  -4  -2   1  293.27   10.52
   4   2  -1  299.53   10.38
   4   2  -1  304.01   10.77
   4   2  -1  301.44   10.50
   4   2  -1  318.35   10.54
  -4  -2   1  314.82   10.51
  -4  -2   1  295.17   10.36
  -4   0   0  805.21   26.70
   4   0   0  792.24   26.69
   4   0   0  757.70   26.67
   4   0   0  772.98   26.65
   4   0   0  750.40   26.80
  -4   0   0  723.87   26.66
   3  -2   2   18.03    1.90
   3  -2   2   18.75    1.70
  -3   2  -2   21.21    1.80
  -3   2  -2   21.29    1.81
   0  -4   3  633.66   21.92
   0  -4   3  625.29   21.92
   0   4  -3  628.99   21.93
   0   4  -3  607.03   21.90
   0   4   5  543.15   18.07
   0  -4  -5  519.40   18.16
   0  -4  -5  511.40   18.08
   0  -4  -5  447.89   18.19
   0   4   5  532.09   18.16
   1   0  -8    2.09    1.58
  -1   0   8    2.43    1.44
   1   0  -8    0.10    1.56
   0  -1   8  106.87    4.52
   0  -1   8  120.00    4.38
   0   1  -8  110.39    4.58
   0  -1   8  110.28    4.55
   0   1  -8  111.59    4.47
   0   1  -8  113.76    4.54
   3  -2  -2   64.68    2.65
   3  -2  -2   74.17    2.67
  -3   2   2   55.29    3.18
  -3   2   2   64.69    2.68
  -3   2   2   65.48    3.17
   3  -2  -2   74.06    3.07
   3  -1   5  452.11   15.75
  -3   1  -5  454.83   15.62
   3  -1   5  396.75   15.95
  -3   1  -5  432.34   15.75
   3  -1   5  455.91   15.58
   4   0   2   10.05    0.79
  -4   0  -2   12.23    1.09
   4   0   2   12.07    1.10
  -4   0  -2   13.51    1.61
   4   0   2    9.61    2.34
   4   0   2   11.11    1.45
   3   3   6  963.64   31.00
  -3  -3  -6  967.89   30.87
  -3  -3  -6  936.37   31.01
   3   3   6  895.28   31.14
  -3  -3  -6  825.06   30.68
  -3  -3  -6  926.40   31.00
   2   0  -7  103.58    4.41
   2   0  -7  115.29    4.07
  -2   0   7  100.08    4.09
  -2   0   7  111.71    4.39
   1  -3  -6  280.01    9.67
  -1   3   6  296.04    9.91
   1  -3  -6  287.22    9.77
  -1   3   6  308.73    9.68
  -1   3   6  245.95    9.41
  -1   4  -1   83.77    3.80
   1  -4   1   82.67    3.62
   1  -4   1   85.00    3.77
  -1   4  -1   85.63    3.50
  -1   4  -1   89.53    3.80
   1  -4   1   91.64    3.56
   2   3  -5 1055.94   37.05
  -2  -3   5 1043.44   37.11
  -2  -3   5 1083.20   37.08
  -1  -2   7   29.05    1.57
   1   2  -7   23.49    2.19
   1   2  -7   25.79    1.71
   2  -1   7  251.30    9.18
  -2   1  -7  260.41    9.24
   2  -1   7  253.30    9.42
  -2   1  -7  255.39    9.22
   2  -1   7  256.07    9.25
  -2   1  -7  262.86    9.49
  -2  -2  -8    7.31    1.43
   2   2   8    9.33    2.30
   2   2   8   10.17    2.04
  -1   1   8   36.81    2.28
  -1   1   8   34.04    2.09
   1  -1  -8   36.60    2.06
  -3  -4  -4 2006.44   66.72
  -3  -4  -4 1929.10   66.86
   3   4   4 1930.24   66.74
  -3  -4  -4 1910.91   66.78
   3   4   4 1787.92   66.82
   1  -3   5    5.31    1.59
  -1   3  -5    3.64    1.58
   1  -3   5    2.55    1.95
  -4  -2  -4  202.69    7.74
  -4  -2  -4  219.41    7.98
   4   2   4  206.09    7.47
  -4  -2  -4  215.45    7.74
   4   2   4  219.72    7.90
   4   2   4  212.38    7.77
  -4  -2  -4  216.18    7.50
   4   0  -1  500.25   17.12
   4   0  -1  500.66   17.25
   4   0  -1  517.26   17.08
   4   0  -1  536.65   17.35
  -4   0   1  491.65   17.09
   4   0  -1  452.20   17.01
   4   1   4  101.75    3.84
   4   1   4  101.90    3.91
  -4  -1  -4   86.59    3.41
   4   1   4   97.07    4.14
  -4  -1  -4  109.36    4.36
   4   1   4   99.69    3.65
  -4  -1  -4   98.85    3.63
  -2  -4   3 1804.58   62.19
   2   4  -3 1847.38   62.18
  -2  -4   3 1605.38   62.32
   2   4  -3 1872.59   62.33
  -2  -4   3 1926.37   62.28
  -2  -4   3 1621.57   62.32
  -4  -1   2 3621.97  111.84
   4   1  -2 3521.09  112.02
  -4  -1   2 3448.47  111.86
  -4  -1   2 3312.91  111.71
   4   1  -2 3457.89  111.96
   4   1  -2 3512.72  111.86
   1   4   6   27.14    2.30
  -1  -4  -6   23.01    2.10
  -1  -4  -6   25.65    1.69
   1   4   6   23.81    2.11
  -1  -4  -6   22.02    2.21
   1  -4  -3  104.12    4.25
  -1   4   3  111.63    4.30
  -1   4   3   98.41    4.44
  -1   4   3  104.77    4.32
   1  -4  -3  110.38    4.26
   1  -4  -3  106.32    4.10
   3   4  -1  151.31    5.00
   3   4  -1  109.99    5.46
  -3  -4   1  142.64    5.35
  -3  -4   1  123.82    4.84
   3   4  -1  146.79    5.28
  -3  -4   1  148.01    5.30
   3   4  -1  137.35    5.14
  -2   3  -3  608.72   21.50
  -2   3  -3  610.65   21.30
   4   3   2    2.05    1.77
   4   3   2    1.03    0.77
   4   3   2    1.77    1.48
  -4  -3  -2    2.28    2.32
   4   3   2    2.21    0.72
  -4  -3  -2    4.42    1.55
  -4  -3  -2    3.60    1.74
   4   3   2    3.08    2.22
   4   3   2    1.09    1.42
   4   3   1  286.19   10.40
  -4  -3  -1  281.62   10.33
  -4  -3  -1  289.62   10.65
   4   3   1  292.81   10.35
   4   3   1  286.19   10.15
  -4  -3  -1  299.65   10.41
   4   3   1  284.81   10.42
   4   3   1  294.74   10.32
  -3  -1  -7   59.24    2.45
  -3  -1  -7   50.42    2.86
   3   1   7   53.92    2.80
   3   1   7   48.86    2.90
   3   1   7   57.72    2.44
  -2  -1   7   74.72    3.42
  -2  -1   7   73.64    2.95
  -2  -1   7   69.80    3.12
  -3  -2  -7  456.94   16.89
  -3  -2  -7  455.09   16.81
  -3  -2  -7  486.97   16.57
   3   2   7  472.70   17.03
   1  -1   8   30.71    2.15
  -1   1  -8   32.69    2.29
  -1   1  -8   30.59    2.11
   1  -1   8   28.78    2.07
  -1   1  -8   25.45    2.05
   1  -1   8   27.51    2.12
  -2   2   6    6.82    1.81
   2  -2  -6    7.43    1.23
  -2   2   6    4.57    1.11
   2  -2  -6    5.00    1.94
   2  -2  -6    2.65    1.89
   4   0   3 1361.82   45.31
   4   0   3 1324.24   45.34
   4   0   3 1164.63   45.51
  -4   0  -3 1317.80   45.31
  -4   0  -3 1289.73   45.20
   2   0   8   89.12    3.60
  -2   0  -8   79.63    3.92
   2   0   8   81.87    3.81
   2   0   8   88.73    3.64
  -2   0  -8   87.31    3.53
  -2   0  -8   87.35    3.73
   2  -3  -4  419.24   15.11
   2  -3  -4  445.01   15.23
  -2   3   4  441.96   15.37
  -2   3   4  428.75   15.48
   2  -3  -4  424.84   15.41
   2  -3  -4  407.01   15.37
  -2   3   4  466.61   15.25
  -3   2  -3  383.49   13.91
  -3   2  -3  438.52   14.24
  -3   2  -3  429.49   14.21
   3  -2   3  420.72   14.23
  -2  -4  -6    9.74    1.93
   2   4   6    9.90    1.80
  -2  -4  -6    7.10    2.43
  -2  -4  -6    9.39    1.76
  -2  -4  -6    9.85    1.14
  -4  -3  -3   -0.20    2.52
   4   3   3    4.09    2.18
   4   3   3    0.83    0.48
  -4  -3  -3    1.02    0.72
   4   3   3   -0.08    0.74
  -4  -3  -3    2.01    1.69
   4   3   3    1.69    1.63
  -4  -3  -3    1.27    1.71
   4   3   3    1.68    1.55
   4   3   0  845.07   29.17
   4   3   0  829.54   29.07
  -4  -3   0  845.44   29.09
   4   3   0  816.40   28.99
   4   3   0  851.16   29.19
  -4  -3   0  806.48   29.30
   4   3   0  843.98   29.09
  -1   2  -7 1809.91   62.89
  -1   2  -7 1768.66   62.81
  -1   2  -7 1824.70   62.79
   1  -2   7 1801.22   62.84
   1  -2   7 1820.24   62.78
  -3  -2   5  283.24   10.02
   3   2  -5  290.94   10.04
  -3  -2   5  279.23   10.04
  -3  -2   5  267.31   10.12
  -3  -2   5  274.48    9.84
   3   2  -5  264.91   10.00
   4   2  -2  670.15   24.85
  -4  -2   2  697.80   25.06
   4   2  -2  759.90   25.17
   4   2  -2  726.63   24.99
  -4  -2   2  759.19   24.98
  -4  -2   2  707.91   24.85
  -4  -2   2  719.78   25.01
  -2   1   7 1161.97   38.84
   2  -1  -7 1231.00   38.89
  -2   1   7 1148.53   38.68
  -2   1   7 1050.73   38.58
   0  -3   6   35.95    2.06
   0  -3   6   34.88    2.28
   0   3  -6   35.69    2.23
  -3   2   3   15.48    1.24
  -3   2   3   15.49    1.47
   3  -2  -3   17.06    1.18
  -3   2   3   18.17    1.98
   3  -2  -3   15.27    1.85
   1   3  -6 1814.32   61.25
  -1  -3   6 1804.74   61.23
  -1  -3   6 1848.78   61.05
  -1  -3   6 1585.78   61.22
   1   3  -6 1841.97   61.11
   1   3  -6 1543.01   61.19
   1   1  -8   25.01    1.78
  -1  -1   8   27.39    1.92
  -1   4  -2   44.31    2.74
   1  -4   2   49.19    2.63
   1  -4   2   33.94    2.51
   1  -4   2   50.71    2.33
  -1   4  -2   47.21    2.33
  -1  -4   4    6.32    1.92
   1   4  -4    3.86    1.73
   1   4  -4    5.66    2.00
  -1  -4   4    4.32    1.92
  -1  -4   4    4.00    1.34
  -1  -4   4   11.15    1.82
  -4   0   2  157.00    5.73
   4   0  -2  164.80    5.80
   4   0  -2  153.87    5.86
   4   0  -2  158.75    6.02
   4   0  -2  152.09    6.03
  -4   0   2  164.79    5.82
   2  -2   6 1411.73   48.88
  -2   2  -6 1401.62   48.97
   2  -2   6 1392.20   48.98
  -2   2  -6 1400.71   48.88
   2  -2   6 1426.92   49.09
   3   3  -4  104.99    4.13
  -3  -3   4   97.36    4.26
  -3  -3   4   87.49    4.49
  -3  -3   4  107.19    4.41
   3   3  -4  107.41    4.15
  -3  -3   4  103.36    4.11
   3   3  -4  104.05    4.38
  -3   1   5 1839.84   57.60
  -3   1   5 1517.22   57.39
   3  -1  -5 1874.52   57.65
   3  -1  -5 1617.43   57.42
  -3   1   5 1852.99   57.59
   3  -1  -5 1808.69   57.67
  -1  -3  -8  316.06   11.59
  -1  -3  -8  315.98   11.63
  -1  -3  -8  325.76   11.59
   1   3   8  325.79   11.58
   1   1   9    5.56    1.83
  -1  -1  -9    0.51    1.96
  -1  -1  -9    6.64    2.13
   1   1   9    4.41    1.99
   1   1   9    6.23    1.91
  -1  -1  -9    4.67    2.04
  -1  -1  -9    1.66    1.77
  -3  -4  -5   32.71    2.04
  -3  -4  -5   29.78    2.35
   3   4   5   33.89    2.03
  -3  -4  -5   32.96    2.31
  -1   4   4  567.83   17.37
  -1   4   4  526.31   17.40
   1  -4  -4  508.50   17.36
   1  -4  -4  562.68   17.36
  -1   4   4  431.83   17.06
   1  -4  -4  535.40   17.24
  -1  -5  -1    4.30    1.44
   1   5   1    4.11    1.91
   1   5   1    3.43    1.98
  -1  -5  -1    4.13    1.96
  -1  -5  -1    4.44    2.04
  -1  -5  -1    1.89    2.14
   1   5   1    2.05    1.82
   1   5   1    3.19    1.44
   1   5   2  753.36   25.76
   1   5   2  721.77   25.82
  -1  -5  -2  748.56   25.83
   1   5   2  763.01   25.83
  -1  -5  -2  751.99   25.65
   1   5   2  667.90   25.80
   1   5   2  722.71   25.66
   1   5   2  732.38   25.82
  -1  -5  -2  738.35   25.85
  -4  -2  -5  277.58   10.49
  -4  -2  -5  312.75   10.82
  -4  -2  -5  302.81   10.98
  -4  -2  -5  301.50   10.79
   4   2   5  298.40   10.81
   4   2   5  309.69   10.91
  -4  -2  -5  299.58   10.51
   4   2   5  316.03   10.51
  -3  -4   2  378.61   14.27
   3   4  -2  401.64   14.19
  -3  -4   2  401.08   14.24
   3   4  -2  396.07   14.24
   3   4  -2  411.55   14.10
   0   1   9  533.99   19.04
   0  -1  -9  553.32   19.15
   0   1   9  540.44   19.12
   0  -1  -9  540.78   19.12
  -4  -3  -4    8.78    2.47
  -4  -3  -4    6.30    0.89
   4   3   4    6.53    1.69
  -4  -3  -4    8.68    1.99
  -4  -3  -4    7.11    1.76
   4   3   4    7.48    1.74
   4   3  -1  606.04   20.53
   4   3  -1  589.14   20.36
   4   3  -1  560.18   20.38
  -4  -3   1  571.97   20.60
  -4  -3   1  583.48   20.52
  -4  -3   1  579.56   20.40
   4   3  -1  585.74   20.49
   0  -4   4   35.72    2.25
   0   4  -4   37.88    2.38
   0   4  -4   36.62    2.33
   0  -4   4   39.16    2.41
   0  -4  -6   99.01    4.45
   0  -4  -6  105.96    4.30
   0   4   6  118.38    4.17
   0  -4  -6   97.85    4.34
   0   4   6  107.54    4.32
  -4  -1  -5  811.65   27.44
   4   1   5  804.83   27.43
  -4  -1  -5  797.81   27.79
   4   1   5  711.20   27.70
   4   1   5  768.84   27.57
   4   1   5  779.22   27.58
   4   1  -3   27.43    1.88
   4   1  -3   32.92    2.40
   4   1  -3   22.78    1.85
  -4  -1   3   30.58    2.58
  -4  -1   3   24.03    1.09
  -4  -1   3   45.37    2.18
   4   0   4  941.91   33.74
   4   0   4  937.57   33.55
  -4   0  -4  969.69   33.67
   4   0   4 1005.12   33.66
  -4   0  -4  981.33   33.58
   3   0   7 1599.84   54.61
  -3   0  -7 1586.90   54.59
   3   0   7 1525.35   54.59
   0   0  -9  148.14    5.78
   0   0  -9  153.58    5.76
   0   0  -9  142.97    5.90
   0   0   9  152.48    5.71
   2   5   2  691.62   24.56
   2   5   2  666.92   24.50
   2   5   2  716.37   24.29
  -2  -5  -2  688.89   24.46
  -2  -5  -2  703.54   24.28
   2   5   2  674.81   24.52
   2   5   2  695.90   24.47
  -1  -5   0   63.23    3.13
  -1  -5   0   64.83    3.17
   1   5   0   62.93    3.14
  -1  -5   0   62.72    2.78
   1   5   0   71.64    3.13
   1   5   0   55.56    2.85
  -1  -5   0   62.88    3.26
   2   5   1   88.90    3.92
   2   5   1   88.09    4.10
  -2  -5  -1   91.24    3.48
  -2  -5  -1   90.29    4.01
   2   5   1   85.37    3.47
   2   5   1   94.68    4.03
   2   5   1   82.64    3.82
  -2  -5  -1   86.59    3.82
  -2   3  -4 1084.22   36.49
  -2   3  -4 1086.74   36.30
   2  -3   4 1058.99   36.32
   1   5   3  528.20   19.07
   1   5   3  533.85   18.89
  -1  -5  -3  540.30   19.06
   1   5   3  554.33   19.05
   1   5   3  533.13   19.05
  -1  -5  -3  549.91   18.87
   1   5   3  521.29   18.97
  -1   2   8   22.18    1.73
   1  -2  -8   22.05    1.95
  -1   2   8   16.45    2.22
   1  -2  -8   26.10    2.59
   1  -2  -8   23.07    1.48
   1   0   9 1090.87   40.18
  -1   0  -9 1137.79   40.24
  -1   0  -9 1183.30   40.16
   1   0   9 1205.85   40.20
  -1   0  -9 1138.00   40.22
   1   0   9 1145.26   40.22
   2   3   8 2020.21   66.76
   2   3   8 1797.60   66.65
  -2  -3  -8 2030.69   66.64
  -2  -3  -8 1987.05   66.78
  -2  -3  -8 1775.64   66.68
  -3   1  -6    7.71    1.67
   3  -1   6    3.28    2.40
   3  -1   6    8.23    1.81
  -3   1  -6    7.24    1.47
   3  -1   6    8.57    1.27
   3   3   7 1094.55   39.13
  -3  -3  -7 1160.34   38.86
  -3  -3  -7 1040.92   39.13
   3   3   7 1093.62   39.26
  -3  -3  -7 1122.43   39.14
  -3  -3  -7 1106.79   39.02
  -3  -1   6  236.84    8.93
   3   1  -6  256.98    8.89
  -3  -1   6  248.94    8.83
  -3  -1   6  235.91    8.67
   3  -2   4  767.71   27.67
   3  -2   4  785.60   27.45
  -3   2  -4  797.03   27.66
  -3   2  -4  790.17   27.45
  -3   2  -4  813.98   27.68
   3   0  -6  561.15   19.16
   3   0  -6  535.80   19.41
  -3   0   6  548.22   19.40
  -3   0   6  543.72   19.16
   1   2   9  566.97   20.02
  -1  -2  -9  535.97   19.97
   1   2   9  595.43   19.99
   2   5   3  430.72   15.05
   2   5   3  425.57   14.80
  -2  -5  -3  431.30   15.02
   2   5   3  419.25   15.11
   2   5   3  402.18   15.08
  -2  -5  -3  417.87   14.79
   4  -1   1  163.87    5.93
  -4   1  -1  160.74    5.93
  -4   1  -1  155.98    6.10
   4  -1   1  162.93    6.09
  -4   1   0    4.65    0.63
   4  -1   0    5.64    0.68
  -4   1   0    6.31    1.52
   4  -1   0    4.41    1.71
  -4   1   0    6.79    1.91
   4  -1   0    4.72    1.38
  -2  -4   4 2331.48   83.03
   2   4  -4 2397.49   82.91
  -2  -4   4 2364.56   82.92
  -2  -4   4 2469.01   82.98
   2   4  -4 2363.62   83.01
   1  -4   3   10.47    1.74
  -1   4  -3    6.21    2.09
   1  -4   3   10.49    1.90
   1  -4   3    9.28    2.16
  -1   4  -3    8.52    1.71
  -2  -5   0  148.33    5.96
   2   5   0  144.34    5.77
   2   5   0  150.94    5.44
   2   5   0  152.48    5.90
   2   5   0  143.96    5.91
   2   5   0  142.60    5.72
  -2  -5   0  147.17    5.48
  -2  -5   0  143.29    5.83
  -2  -5   0  146.13    5.73
   0   3   8    9.53    2.23
   0  -3  -8   15.88    1.88
   0  -3  -8   11.12    2.16
   0   3   8   10.89    1.90
   0  -3  -8   14.11    1.89
  -3   2   4  235.06    8.04
  -3   2   4  237.06    8.39
   3  -2  -4  221.88    8.03
   3  -2  -4  214.25    8.37
  -3   2   4  224.68    8.21
  -4  -2   3  329.03   12.86
  -4  -2   3  367.11   12.84
   4   2  -3  362.54   12.93
  -4  -2   3  366.75   12.64
  -4  -2   3  347.37   12.87
   4   2  -3  364.35   12.66
   4   2  -3  383.80   13.06
  -4  -2   3  363.43   13.11
   4   2  -3  349.30   12.86
  -1   3   7 1124.56   35.15
   1  -3  -7 1077.38   35.14
  -1   3   7 1083.12   35.32
   2  -3  -5  145.94    5.58
  -2   3   5  138.15    5.45
  -2   3   5  129.64    5.56
  -2   3   5  144.28    5.21
   2  -3  -5  139.58    5.18
   2  -3  -5  133.83    5.44
  -2  -2   7  224.58    8.26
   2   2  -7  238.40    7.97
   2   2  -7  192.26    8.18
  -1  -4  -7  559.43   20.56
   1   4   7  589.30   20.60
   1   4   7  607.46   20.55
  -1  -4  -7  580.59   20.62
  -1  -4  -7  576.00   20.43
   4   0  -3   77.62    3.28
   4   0  -3   76.90    3.44
   4   0  -3   79.60    3.21
  -4   0   3   77.57    3.21
  -1  -5   1  192.31    7.06
  -1  -5   1  192.05    7.22
   1   5  -1  193.80    7.20
  -1  -5   1  202.56    7.26
  -1  -5   1  180.22    7.25
   1   5  -1  197.53    7.05
   1   5  -1  192.32    7.24
  -1  -5   1  190.06    7.31
   1   5  -1  178.32    7.27
   4  -1   2  152.61    5.66
  -4   1  -2  150.73    5.68
   4  -1   2  161.22    5.84
  -4   1  -2  153.06    5.82
   4  -1  -1 1626.04   55.02
   4  -1  -1 1611.95   55.21
   4  -1  -1 1590.20   55.12
  -4   1   1 1658.68   55.25
  -4   1   1 1569.22   55.14
   4  -1  -1 1554.28   55.02
  -4   1   1 1550.02   55.00
   1  -3   6 1720.22   59.49
  -1   3  -6 1692.62   59.49
   1  -3   6 1720.59   59.57
   2   3  -6 1842.61   64.90
  -2  -3   6 1915.45   65.19
   2   3  -6 1895.40   65.13
  -2  -3   6 1896.20   65.16
   1   5   4  902.45   32.13
   1   5   4  970.17   32.22
   1   5   4  940.01   32.05
  -1  -5  -4  942.55   32.20
   1   5   4  899.06   32.24
   1   5   4  987.62   32.20
  -1  -5  -4  919.15   32.03
  -1  -5  -4  794.42   32.15
   0   2  -8 1713.10   59.20
   0   2  -8 1709.57   59.23
   0  -2   8 1674.27   59.14
   0  -2   8 1712.15   59.22
  -4  -3  -5    6.76    1.09
   4   3   5    6.67    1.86
   4   3   5    7.12    1.86
  -4  -3  -5    6.84    2.13
  -4  -3  -5    4.21    1.86
  -4  -3  -5    6.60    2.01
  -4  -3   2   34.00    2.93
   4   3  -2   23.11    1.88
  -4  -3   2   31.64    1.92
   4   3  -2   27.09    2.54
  -4  -3   2   27.55    2.38
  -4  -3   2   26.15    2.39
  -4  -3   2   32.09    2.19
   4   3  -2   30.32    2.35
   4   3  -2   33.03    1.66
   0   2   9  176.27    6.63
   0  -2  -9  175.76    6.65
   2   4   7  367.87   14.40
  -2  -4  -7  417.81   14.36
  -2  -4  -7  410.96   14.55
  -2  -4  -7  412.57   14.42
  -2  -1  -9  749.65   25.66
   2   1   9  710.00   25.79
   2   1   9  730.99   25.81
   0  -5  -1   76.25    3.49
   0  -5  -1   69.87    3.20
   0   5   1   67.47    3.21
   0   5   1   75.01    3.31
   0  -5  -1   68.91    3.22
   0   5   1   77.99    3.58
   0  -5  -1   71.76    3.41
  -1   4   5  394.73   13.27
   1  -4  -5  361.33   13.27
   1  -4  -5  359.79   13.23
   2   5   4 1982.08   67.18
  -2  -5  -4 1955.60   67.15
  -2  -5  -4 1937.75   66.97
   2   5   4 1896.43   66.99
   2   5   4 1898.32   67.21
  -3  -4  -6  188.62    7.41
  -3  -4  -6  183.56    6.84
  -3  -4  -6  218.12    7.22
  -3  -4  -6  218.79    7.39
   3   4   6  220.33    7.24
   0  -5  -2    3.24    2.11
   0  -5  -2    5.57    1.99
   0   5   2    0.70    1.69
   0  -5  -2   -1.25    1.68
   0   5   2    0.44    1.70
   0   5   2   -1.51    2.11
   2  -1   8  208.10    7.38
   2  -1   8  203.24    7.57
  -2   1  -8  194.98    7.65
   2  -1   8  194.88    7.32
  -2   1  -8  199.63    7.40
  -2   1  -8  194.60    7.36
  -3  -2  -8  300.81   10.23
   3   2   8  285.02   10.70
   3   2   8  291.68   10.57
  -3  -2  -8  259.10   10.52
  -3  -1  -8   66.42    3.51
   3   1   8   67.45    3.42
  -3  -1  -8   79.62    3.09
   3   1   8   75.97    3.14
  -2   0   8   86.73    3.79
   2   0  -8   88.42    3.52
   2   0  -8   84.78    3.92
  -2   0   8   88.20    3.48
   2   5  -1   48.30    2.76
   2   5  -1   50.45    2.33
   2   5  -1   42.64    2.98
   2   5  -1   46.15    2.86
  -2  -5   1   52.83    2.97
   2   5  -1   46.89    2.95
  -2  -5   1   48.37    2.47
   2   5  -1   45.83    2.83
  -2  -5   1   35.52    2.82
   2  -2  -7  324.43   11.38
  -2   2   7  310.43   11.61
  -2   2   7  322.79   11.37
   2  -2  -7  328.01   11.67
   2  -2  -7  316.17   11.66
   0  -5   0  807.96   29.26
   0   5   0  851.78   29.28
   0  -5   0  829.54   29.35
   0   5   0  870.69   29.31
   0   5   0  842.80   29.40
   0  -5   0  860.73   29.26
   0  -5   0  784.93   29.34
   3   4  -3   94.65    4.03
   3   4  -3  101.26    3.85
  -3  -4   3   91.61    4.15
   3   4  -3   94.46    4.28
  -3  -4   3   94.45    3.95
  -3  -4   3  100.83    4.23
  -3  -4   3   78.09    4.11
  -2  -2  -9  335.49   11.85
   2   2   9  358.61   12.16
   2   2   9  355.90   12.12
   2   2   9  287.99   12.03
  -4  -2  -6   11.61    1.14
   4   2   6   10.15    2.25
  -4  -2  -6   13.29    2.40
   4   2   6    6.20    2.04
  -4  -2  -6    9.17    2.05
   4   2   6   10.91    1.11
  -4   0  -5  246.32    8.90
   4   0   5  242.77    8.76
   4   0   5  241.65    9.06
   4   0   5  249.34    8.91
  -4   0  -5  252.95    8.80
  -1  -4   5    5.87    1.29
  -1  -4   5    8.21    2.16
   1   4  -5    7.43    2.17
  -1  -4   5    6.73    1.95
   1   4  -5    2.46    1.72
  -1  -4   5    9.53    2.28
   1   0  -9 1230.94   42.66
  -1   0   9 1216.12   42.64
  -4  -4  -2  111.85    4.54
   4   4   2  111.13    4.25
   4   4   2  111.79    4.01
   4   4   2  115.69    4.62
  -4  -4  -2  103.83    4.45
   4   4   2  118.60    4.65
   4   4   2  117.11    4.36
  -4  -4  -2  113.24    4.96
   0  -1   9    8.48    2.21
   0   1  -9    6.17    1.96
   0   1  -9    6.85    2.02
   0   1  -9    7.04    1.79
   0  -1   9    6.49    2.02
   0  -1   9    5.86    1.60
   1   2  -8   24.33    1.75
   1   2  -8   17.03    2.30
   4  -1   3  308.85   11.21
  -4   1  -3  316.01   11.09
  -4   1  -3  309.92   11.21
   4  -1  -2   21.13    1.80
   4  -1  -2   17.28    1.89
   4  -1  -2   16.02    0.89
  -4   1   2   14.32    0.80
  -4   1   2   18.38    1.35
  -4   1   2   23.57    1.88
   4  -1  -2   17.65    1.46
   4  -1  -2   14.56    1.79
  -4  -4  -1 1339.06   47.03
   4   4   1 1351.59   46.83
   4   4   1 1328.45   46.88
  -4  -4  -1 1308.97   46.74
   4   4   1 1347.33   46.89
   4   4   1 1388.83   46.62
   4   4   1 1327.37   46.70
   4   4   1 1341.90   46.70
  -4  -4  -1 1295.71   46.83
  -3  -2   6   31.35    2.18
   3   2  -6   27.65    2.34
  -3  -2   6   26.85    1.85
  -3  -2   6   24.19    2.36
   4   1   6   48.86    2.65
  -4  -1  -6   36.23    3.06
   4   1   6   43.71    2.15
  -4  -1  -6   42.25    2.17
   4   1   6   46.66    2.62
   0   5   3  796.00   27.52
   0  -5  -3  802.71   27.65
   0   5   3  768.57   27.61
   0  -5  -3  800.10   27.70
   0   5   3  791.19   27.71
   0  -5  -3  772.46   27.58
   4   1  -4  121.14    4.25
  -4  -1   4  126.78    4.27
   4   1  -4  124.34    4.09
  -4  -1   4  121.82    4.53
   4   1  -4  125.48    4.22
  -3  -3   5  110.07    4.08
   3   3  -5  108.43    4.10
  -3  -3   5  105.68    4.29
   3   3  -5  116.17    4.31
  -3  -3   5  109.39    4.55
   3   3  -5   91.24    3.52
  -3  -3   5  123.92    4.47
  -3   1   6  202.12    7.59
   3  -1  -6  238.41    8.07
   3  -1  -6  232.32    8.00
  -3   1   6  230.74    7.91
  -3   1   6  219.02    7.97
  -1   1   9 1149.01   40.97
   1  -1  -9 1179.29   40.86
  -1   1   9 1179.82   40.86
  -4  -4  -3  536.21   19.00
   4   4   3  547.05   18.99
   4   4   3  550.67   18.91
  -4  -4  -3  535.12   18.79
   4   4   3  522.22   18.80
  -4  -4  -3  531.16   18.95
  -4  -4  -3  554.29   19.26
  -2  -1   8  987.42   36.11
  -2  -1   8 1044.52   36.02
  -2  -1   8 1047.86   35.95
   0  -3   7  252.68    9.22
   0  -3   7  249.40    9.11
   0   3  -7  252.65    9.21
  -1  -5   2 1170.46   41.24
  -1  -5   2 1201.97   41.13
  -1  -5   2 1203.17   41.26
   1   5  -2 1209.58   41.12
   1   5  -2 1069.10   41.22
   1   5  -2 1206.09   41.24
   0  -4   5   23.17    2.15
   0  -4   5   21.72    2.09
   0  -4   5   25.41    2.25
   0   4  -5   24.25    2.18
   2  -2   7 1181.88   40.86
   2  -2   7 1155.10   40.64
  -2   2  -7 1190.94   40.73
  -2   2  -7 1160.12   40.66
   2  -2   7 1153.75   40.74
  -2   3  -5  223.59    8.42
   2  -3   5  232.04    8.18
  -2   3  -5  215.31    8.36
   2  -3   5  243.43    8.59
  -2   3  -5  219.84    8.13
   0  -4  -7   47.89    2.74
   0   4   7   46.14    2.71
   0  -4  -7   49.24    2.58
   0  -4  -7   49.88    3.00
   3  -3   0   35.83    2.42
   3  -3   0   37.22    2.09
  -3   3   0   29.55    2.41
  -3   3   0   32.52    2.25
   0  -5   1  200.51    7.84
   0  -5   1  220.82    7.88
   0   5  -1  220.71    7.89
   0  -5   1  219.22    7.95
   0   5  -1  215.16    7.92
   0   5  -1  200.57    8.09
   0  -5   1  217.67    8.06
  -2   4   1  443.80   16.15
   2  -4  -1  457.59   16.15
   2  -4  -1  424.08   16.03
  -2   4   1  447.89   16.07
   2  -4  -1  474.91   16.01
  -2   4   1  456.24   15.88
   3   5   2 1190.97   40.66
  -3  -5  -2 1163.25   40.39
   3   5   2 1141.68   40.39
  -3  -5  -2 1159.11   40.57
   3   5   2 1188.64   40.76
  -3  -5  -2 1150.13   40.48
   3   5   2 1141.36   40.75
   3   5   2 1161.81   40.56
  -3  -5  -2 1217.60   40.67
  -1  -3   7 1083.84   39.80
   1   3  -7 1147.22   39.82
  -1  -3   7 1092.22   39.83
  -1  -3   7 1169.03   39.62
   1   3  -7 1160.53   39.68
   3  -2   5   53.27    2.58
   3  -2   5   47.20    1.96
  -3   2  -5   39.90    2.47
  -3   2  -5   31.08    1.91
  -3   2  -5   37.68    2.56
   3  -2   5   29.08    3.11
   2  -1  -8  659.60   23.00
  -2   1   8  644.33   23.16
  -2   1   8  666.35   22.98
   2  -1  -8  687.51   23.23
  -2   1   8  645.34   22.87
  -2   4   0  232.32    8.36
   2  -4   0  229.45    8.38
   2  -4   0  195.39    8.31
   2  -4   0  239.81    8.29
  -1   2  -8  121.19    4.71
   1  -2   8  118.01    4.79
  -1   2  -8  119.45    4.95
  -1   2  -8  105.93    4.72
   1  -2   8  117.45    4.66
   2   0   9    8.95    2.02
  -2   0  -9    6.19    2.21
  -2   0  -9   10.14    2.39
   2   0   9   14.42    2.22
  -2   0  -9    9.58    1.78
   2   0   9   11.74    1.86
  -4  -4   0  817.46   29.01
   4   4   0  846.57   29.12
   4   4   0  837.09   29.01
  -4  -4   0  843.46   29.13
   4   4   0  815.89   28.95
   4   4   0  828.31   28.95
  -4  -4   0  835.36   29.32
   4   4   0  827.46   29.19
   4   4   0  858.87   29.20
   1  -4   4  154.56    5.48
  -1   4  -4  135.80    5.68
  -1   4  -4  146.75    5.43
   1  -4   4  122.86    5.57
  -1  -5  -5  371.20   13.78
   1   5   5  369.37   13.86
  -1  -5  -5  378.62   13.80
   1   5   5  389.40   13.62
  -1  -5  -5  388.94   13.57
   1   5   5  383.40   13.76
   1   5   5  396.48   13.82
  -3   3   1 1020.13   35.97
   3  -3  -1 1046.06   36.03
  -3   3   1 1032.84   36.15
   3  -3  -1 1040.09   36.14
   3   5   1 2212.33   75.98
  -3  -5  -1 2270.86   76.22
   3   5   1 2225.02   76.22
   3   5   1 2257.35   76.15
   3   5   1 2190.04   76.31
   3   5   1 2021.32   76.28
  -3  -5  -1 2122.30   76.12
  -3  -5  -1 2224.84   76.03
  -3  -5  -1 2153.84   76.00
  -1   1  -9    5.79    2.06
   1  -1   9    6.06    2.02
   1  -1   9    5.96    2.16
  -1   1  -9    3.14    2.01
  -1   1  -9    4.88    2.04
   1  -1   9    5.09    1.85
   1  -1   9    5.18    1.99
  -2  -5  -5 1099.93   38.09
   2   5   5 1069.05   38.32
  -2  -5  -5 1109.65   38.29
   3  -3   1  243.91    8.50
  -3   3  -1  216.66    8.08
   3  -3   1  231.33    8.11
   3  -3   1  244.50    8.42
  -3   3  -1  241.40    8.46
  -3   3  -1  223.06    8.50
   3   5   3  227.76    7.82
  -3  -5  -3  226.68    8.12
  -3  -5  -3  216.38    7.81
   3   5   3  181.87    8.24
  -3  -5  -3  226.15    8.28
   3   5   3  227.20    8.49
  -3  -5  -3  225.41    8.09
   3   5   3  228.54    8.15
   3  -2  -5  160.76    6.27
  -3   2   5  160.35    6.02
   3  -2  -5  168.54    6.35
   3  -2  -5  171.26    5.90
  -3   2   5  162.70    5.91
  -3   2   5  160.92    6.18
   4   0  -4  478.00   16.90
  -4   0   4  493.41   16.92
  -4   0   4  461.84   17.04
   4   0  -4  479.47   16.93
  -2   4   2  635.55   22.29
   2  -4  -2  625.21   22.36
   2  -4  -2  590.92   22.31
   2  -4  -2  639.63   22.26
  -2   4   2  664.46   22.15
  -2   4   2  617.79   22.38
  -4  -2   4 2211.03   77.40
  -4  -2   4 2274.66   77.36
  -4  -2   4 2228.86   77.22
   4   2  -4 2221.21   77.38
  -4  -2   4 2094.17   77.51
   4   2  -4 2288.73   77.43
   1   3   9  234.03    8.57
  -1  -3  -9  226.53    8.58
  -1  -3  -9  240.65    8.70
  -1  -3  -9  229.96    8.66
  -4  -4  -4   33.49    1.90
   4   4   4   40.49    1.99
   4   4   4   38.24    2.58
  -4  -4  -4   39.79    2.50
  -4  -4  -4   32.39    2.49
   4   4   4   34.14    2.33
  -4  -4  -4   31.54    3.19
  -2   4  -1  495.83   18.36
   2  -4   1  525.51   18.16
  -2   4  -1  522.88   18.16
   2  -4   1  509.36   18.31
   2  -4   1  519.72   18.37
  -4  -3  -6  187.97    6.65
  -4  -3  -6  195.43    6.76
   4   3   6  199.88    6.74
  -4  -3  -6  195.08    6.37
   4   3   6  197.73    6.78
  -4  -3  -6  157.31    6.14
  -4  -3  -6  193.63    6.86
   0  -5  -4  236.17    9.79
   0  -5  -4  258.60    9.60
   0   5   4  285.22    9.66
   0   5   4  255.71    9.51
   0   5   4  274.14    9.66
   0   5   4  283.95    9.76
   0  -5  -4  269.44    9.71
   4   3  -3  180.59    6.89
  -4  -3   3  188.29    6.81
   4   3  -3  173.30    6.60
  -4  -3   3  175.65    7.13
   4   3  -3  178.39    7.09
   4   3  -3  175.36    6.89
   4   3  -3  187.69    6.48
  -4  -3   3  178.38    6.85
  -4  -3   3  165.75    6.87
  -4  -3   3  180.43    6.61
   2   5  -2  257.71    9.22
  -2  -5   2  243.70    9.28
  -2  -5   2  252.15    8.93
  -2  -5   2  243.61    9.13
   2   5  -2  244.53    8.90
   2   5  -2  240.65    9.13
   2   5  -2  241.22    9.17
   2  -3  -6  279.67   10.29
  -2   3   6  281.51   10.24
   2  -3  -6  274.60   10.00
  -2   3   6  291.74   10.04
   2  -3  -6  254.64   10.23
  -2   3   6  299.27   10.35
  -1  -1   9    1.95    1.81
   1   1  -9    2.52    1.62
  -3   1  -7 3974.07  137.85
   3  -1   7 3969.77  138.03
  -3   1  -7 3918.29  137.79
   3  -1   7 3998.60  137.76
  -3   1  -7 3752.34  138.06
   3  -1   7 4137.89  137.86
  -3  -3  -8  565.97   19.14
  -3  -3  -8  549.13   19.30
  -3  -3  -8  536.77   19.43
   3   3   8  519.12   19.60
  -3  -3  -8  527.11   19.46
  -3  -5   0  439.73   15.38
  -3  -5   0  431.79   15.08
   3   5   0  448.50   15.33
   3   5   0  441.91   15.55
  -3  -5   0  417.07   15.14
   3   5   0  422.15   15.12
   3   5   0  430.33   15.37
  -3   3   2  137.88    5.05
  -3   3   2  170.40    5.69
   3  -3  -2  152.88    5.57
  -3   3   2  160.44    5.30
   3  -3  -2  158.76    5.30
   3  -3  -2  127.43    5.00
   3   0   8   51.74    3.19
   3   0   8   52.56    3.72
  -2  -4   5  337.81   11.91
   2   4  -5  277.66   12.01
   2   4  -5  334.36   11.90
  -2  -4   5  360.52   12.10
  -2  -4   5  343.02   11.97
  -4   1  -4   10.77    1.95
  -4   1  -4   15.23    1.72
   4  -1   4   12.59    1.94
   4  -1  -3  261.93    9.63
   4  -1  -3  239.17    9.47
   4  -1  -3  262.46    9.46
  -4   1   3  276.39    9.37
   4  -1  -3  265.90    9.40
   1  -4  -6    4.29    1.90
   1  -4  -6    5.68    1.91
  -1   4   6    5.71    1.76
  -3   3  -2    2.75    1.89
   3  -3   2    3.77    1.12
   3  -3   2    5.58    1.94
   3  -3   2    2.20    2.03
  -3   3  -2    2.09    0.84
  -3   3  -2    1.46    2.02
  -3  -5  -4   48.53    2.63
  -3  -5  -4   45.79    1.90
   3   5   4   47.96    2.69
  -3  -5  -4   49.31    2.52
   3   5   4   48.90    1.93
  -3  -5  -4   44.69    2.84
   4   4  -1  723.25   24.88
   4   4  -1  725.26   24.73
  -4  -4   1  726.11   24.93
  -4  -4   1  675.54   24.79
   4   4  -1  712.59   25.02
   4   4  -1  669.23   24.66
  -4  -4   1  728.48   25.01
   4   4  -1  727.74   24.80
   4   4  -1  727.62   24.91
   4   4  -1  700.26   24.59
  -3   0   7  819.00   28.37
  -3   0   7  815.38   28.60
   3   0  -7  819.88   28.36
   3   0  -7  790.21   28.61
  -3  -4  -7   42.62    2.40
  -3  -4  -7   43.43    2.84
  -3  -4  -7   45.36    3.18
   2   3   9 1070.63   39.66
   2   3   9 1138.92   39.61
  -2  -3  -9 1199.26   39.53
   2   3   9 1096.58   39.56
  -1  -1 -10   18.37    2.44
   1   1  10   12.32    2.23
   1   1  10   18.64    2.08
  -1  -1 -10   16.75    2.12
  -1  -1 -10   16.38    2.35
   1   1  10   15.74    2.43
  -1  -1 -10   17.58    2.55
   1   4   8  265.12    9.60
  -1  -4  -8  248.63    9.54
  -1  -4  -8  261.38    9.70
  -1  -4  -8  273.10    9.71
   0  -5   2  170.33    6.43
   0   5  -2  174.06    6.43
   0  -5   2  171.28    6.63
   0   5  -2  170.76    6.45
   0   5  -2  160.03    6.60
   0  -5   2  166.35    6.47
   2  -4  -3    4.19    2.20
  -2   4   3    4.49    1.75
  -2   4   3    3.77    2.21
   2  -4  -3    2.88    1.74
   2  -4  -3    4.33    1.95
  -3  -1   7  501.70   18.55
  -3  -1   7  533.85   18.48
   3   1  -7  532.52   18.57
   1  -3  -8  124.24    4.50
  -1   3   8  124.28    4.98
  -1   3   8   90.94    4.37
   4   0   6  619.90   21.83
  -4   0  -6  648.17   21.96
   4   0   6  615.30   22.09
   4   0   6  616.23   21.93
  -3  -4   4  943.18   31.27
  -3  -4   4  896.40   31.33
  -3  -4   4  890.62   31.40
   3   4  -4  916.80   31.21
   3   4  -4  938.04   31.32
  -3  -4   4  741.26   31.32
   3   4  -4  905.38   31.39
  -2   4  -2 1528.47   53.49
   2  -4   2 1524.86   53.66
   2  -4   2 1562.29   53.51
  -2   4  -2 1545.91   53.69
   2  -4   2 1523.20   53.69
  -1   2   9 1085.13   38.78
   1  -2  -9 1119.85   38.52
   1  -2  -9 1097.48   38.84
  -1   2   9 1106.15   38.62
  -2  -4  -8  291.52   10.82
  -2  -4  -8  287.02   10.89
  -2  -4  -8  314.17   10.80
   2   4   8  286.36   10.73
   0   1  10  305.63   10.91
   0  -1 -10  303.17   11.07
   0  -1 -10  305.84   11.03
   0   1  10  301.17   11.02
  -4  -2  -7   81.72    3.21
   4   2   7   74.02    4.19
   4   2   7   76.75    3.82
  -4  -2  -7   80.43    4.08
  -4  -2  -7   72.88    3.75
   4   2   7   80.36    3.85
   4   2   7   86.38    3.18
  -1  -5   3  103.23    4.07
  -1  -5   3   79.73    4.20
   1   5  -3   96.38    4.01
   1   5  -3  106.42    4.22
  -1  -5   3   99.79    4.19
   1   5  -3   85.03    4.26
   0   3   9 1319.26   45.67
   0  -3  -9 1269.77   45.77
   0   3   9 1258.70   45.83
   0  -3  -9 1329.81   45.70
   0  -3  -9 1342.59   45.66
  -3  -5   1  520.00   18.40
   3   5  -1  540.08   18.53
   3   5  -1  511.86   18.37
   3   5  -1  522.14   18.57
   3   5  -1  538.03   18.77
  -3  -5   1  534.62   18.58
  -3  -5   1  520.42   18.76
  -3  -5   1  519.42   18.23
   4   4   5  262.48    9.64
  -4  -4  -5  275.15    9.88
  -4  -4  -5  267.55    9.63
   4   4   5  278.79    9.88
   4   4   5  269.02    9.93
  -4  -4  -5  277.54    9.93
   3  -3  -3  648.31   22.66
  -3   3   3  628.22   22.50
  -3   3   3  624.76   22.70
  -3   3   3  642.46   22.49
   3  -3  -3  658.20   22.46
   1  -3   7  524.60   18.33
  -1   3  -7  505.97   18.31
   1  -3   7  524.60   18.39
   0   0 -10  523.15   19.31
   0   0 -10  544.89   19.18
   0   0 -10  533.48   19.22
   0   0  10  559.71   19.19
   2   5   6  577.82   22.40
  -2  -5  -6  671.16   22.39
   2   5   6  640.33   22.43
  -2  -5  -6  638.84   22.14
   1   5   6   45.17    2.68
   1   5   6   42.13    2.82
  -1  -5  -6   52.38    3.01
  -1  -5  -6   43.24    2.76
  -1  -5  -6   41.31    2.29
   1   5   6   43.87    2.91
  -1  -2 -10  858.37   30.30
   1   2  10  920.79   30.30
   1   2  10  872.22   30.31
  -1  -2 -10  795.95   30.33
   4   1   7 1231.73   42.79
   4   1   7 1254.10   42.63
  -4  -1  -7 1064.46   42.90
   4   1   7 1215.45   42.71
  -4  -1  -7 1272.77   42.64
   4   1   7 1224.24   42.80
   0  -5  -5  747.85   26.32
   0   5   5  757.34   26.30
   0  -5  -5  753.10   26.41
   0  -5  -5  698.97   26.44
   0   5   5  737.83   26.35
   0   5   5  807.91   26.43
  -1   0 -10  947.50   35.27
  -1   0 -10 1009.10   35.22
   1   0  10 1012.98   35.26
   1   0  10 1031.10   35.28
   1   0  10 1053.11   35.26
  -1   0 -10  982.24   35.32
  -4  -1   5 2341.25   77.10
   4   1  -5 2364.44   76.94
  -4  -1   5 2410.77   76.99
   4   1  -5 2356.15   76.98
  -2  -3   7  268.25   10.07
   2   3  -7  268.07    9.98
   2   3  -7  274.05    9.68
  -2  -3   7  283.04   10.05
  -2  -2   8  142.17    5.87
   2   2  -8  152.01    5.51
   5   2   1  106.83    4.12
   5   2   1  103.16    4.34
  -5  -2  -1  100.63    3.94
   5   2   1  108.69    4.09
  -5  -2  -1   92.51    3.92
   5   2   1  103.85    3.99
   5   2   1   98.80    3.97
   5   2   1   99.88    4.56
   5   2   2  605.90   21.85
   5   2   2  615.89   21.50
   5   2   2  620.23   21.50
   5   2   2  611.21   21.69
   5   2   2  635.21   21.42
  -5  -2  -2  602.63   21.50
   5   2   2  592.52   21.51
  -5  -2  -2  603.88   21.47
  -3   3  -3  489.20   17.04
   3  -3   3  503.96   17.05
  -3   3  -3  478.50   16.73
  -3   3  -3  447.59   17.04
  -3  -5  -5  760.51   28.21
  -3  -5  -5  796.12   27.86
  -3  -5  -5  810.95   28.10
  -3  -5  -5  837.92   28.15
   3   5   5  813.74   28.14
   5   1   1  165.53    6.84
   5   1   1  212.36    7.08
   5   1   1  221.94    7.07
   5   1   1  237.96    7.58
   5   1   1  204.31    7.04
   5   1   1  201.36    7.03
   5   1   1  219.28    7.17
   1   4  -6   51.86    2.97
  -1  -4   6   49.83    2.90
  -1  -4   6   49.29    3.08
  -1  -4   6   49.54    2.31
  -1  -4   6   45.59    2.95
   1   4  -6   48.76    2.75
  -2  -5   3   42.13    3.12
   2   5  -3   38.33    2.98
   2   5  -3   41.35    2.71
   2   5  -3   44.47    2.65
  -2  -5   3   41.94    2.52
  -2  -5   3   37.99    2.80
   2   5  -3   41.42    2.39
  -3   2  -6    8.55    2.04
   3  -2   6    5.40    1.32
  -3   2  -6    6.51    1.96
   3  -2   6   11.18    2.62
   3  -2   6    6.59    1.97
  -3   2  -6    8.87    1.41
  -1   5   1  260.49    9.53
   1  -5  -1  268.87    9.48
   1  -5  -1  266.57    9.21
   1  -5  -1  250.76    9.43
  -1   5   1  238.35    9.56
  -1   5   1  246.19    9.43
   1  -5  -1  256.05    9.41
  -1   5   1  260.60    9.34
   3   2   9  101.46    4.69
   3   2   9  104.92    4.85
  -3  -2  -9  107.16    4.11
  -5  -1  -2 1319.15   45.57
   5   1   2 1288.26   45.51
   5   1   2 1314.72   45.49
   5   1   2 1331.08   45.55
   5   1   2 1313.75   45.55
   5   1   2 1363.48   45.84
   5   1   2 1265.19   45.53
   1  -4   5 2372.28   79.79
  -1   4  -5 2289.84   79.66
   1  -4   5 2302.44   79.68
  -1   4  -5 2206.68   79.77
   4  -2   0 1866.40   63.45
   4  -2   0 1799.09   63.51
  -4   2   0 1826.51   63.58
   4  -2   0 1789.61   63.56
  -4   2   0 1831.01   63.51
   2  -2  -8  528.00   18.20
   2  -2  -8  500.82   18.15
  -2   2   8  497.99   18.11
  -2   2   8  509.05   17.86
  -2   4   4  351.43   11.54
   2  -4  -4  325.23   11.64
  -2   4   4  312.31   11.78
   2  -4  -4  329.00   11.72
   2  -4  -4  329.94   11.51
  -2   4   4  269.39   11.66
   2  -4  -4  319.76   11.37
   5   2   0 1239.19   40.98
   5   2   0 1169.86   41.05
  -5  -2   0 1234.61   40.77
   5   2   0 1170.58   40.79
   5   2   0 1253.04   41.12
   5   2   0 1091.17   40.64
   5   2   0 1201.36   40.76
   5   2   0 1173.39   40.82
   5   2   0 1214.02   40.84
   4   4  -2   41.34    2.45
   4   4  -2   31.66    1.49
   4   4  -2   37.66    2.13
  -4  -4   2   30.75    2.68
   4   4  -2   31.86    2.91
   4   4  -2   39.83    2.72
  -4  -4   2   36.12    2.29
  -2   3  -6  208.79    8.00
  -2   3  -6  204.77    7.92
   2  -3   6  225.29    8.16
   2  -3   6  214.83    7.73
  -2   3  -6  207.46    7.71
  -3  -1  -9  391.96   13.80
   3   1   9  396.92   13.84
   3   1   9  375.17   13.97
   5   2   3   50.26    3.47
   5   2   3   58.25    2.46
   5   2   3   50.91    2.82
   5   2   3   57.00    3.20
  -5  -2  -3   59.04    2.80
  -5  -2  -3   60.79    2.79
  -4   2  -1  231.44    8.64
  -4   2  -1  227.74    8.51
   4  -2   1  234.49    8.61
   4  -2   1  235.38    8.51
  -4   1  -5 2056.91   68.47
   4  -1   5 2002.13   68.45
   4  -1   5 1921.77   68.24
  -4   1  -5 2001.47   68.40
  -1   5   2 1569.45   52.81
   1  -5  -2 1550.02   52.83
  -1   5   2 1522.13   52.91
  -1   5   2 1402.34   52.94
   1  -5  -2 1592.59   52.90
   1  -5  -2 1455.51   52.84
  -1   5   2 1504.58   52.87
   5   1   0   45.27    2.27
   5   1   0   56.31    2.67
   5   1   0   57.48    2.32
   5   1   0   55.95    2.41
   5   1   0   57.96    2.22
   5   1   0   43.52    2.09
   4  -1  -4 1286.74   45.73
   4  -1  -4 1319.87   45.67
  -4   1   4 1329.13   45.65
   4  -1  -4 1298.93   45.79
  -3  -3   6  162.79    6.18
  -3  -3   6  168.44    5.98
   3   3  -6  169.14    6.09
  -3  -3   6  163.63    6.23
   3   3  -6  149.29    5.54
   4   0  -5  277.22   10.11
   4   0  -5  281.04    9.98
  -4   0   5  278.94   10.25
   4   0  -5  275.59    9.99
  -4   0   5  286.19   10.14
  -3   1   7   71.93    2.90
  -3   1   7   78.02    3.54
   3  -1  -7   85.72    3.64
  -1   5   0  357.88   13.37
   1  -5   0  385.65   13.08
   1  -5   0  360.39   13.24
  -1   5   0  364.82   13.25
  -1   5   0  339.37   13.33
   1  -5   0  391.92   13.32
  -1   5   0  368.90   13.15
   0   2  -9   85.47    3.87
   0  -2   9   75.20    3.79
   0  -2   9   85.13    3.62
   0   2  -9   83.75    3.71
  -4  -3  -7  404.48   14.60
   4   3   7  408.81   15.21
  -4  -3  -7  428.38   15.12
   4   3   7  425.60   15.06
   4   3   7  451.44   15.04
  -4  -3  -7  403.84   14.99
  -4  -3  -7  431.88   14.77
  -4  -3  -7  431.90   15.03
  -3   2   6  949.18   33.23
   3  -2  -6  966.47   33.53
  -3   2   6  969.25   33.30
  -3   2   6  951.59   33.40
   3  -2  -6  940.29   33.48
   3  -2  -6  955.67   33.23
  -4  -3   4  337.08   12.97
  -4  -3   4  361.20   12.61
   4   3  -4  357.64   12.80
  -4  -3   4  354.74   12.77
  -4  -3   4  339.69   12.84
  -4  -3   4  345.90   12.74
   4   3  -4  358.78   12.64
   4   3  -4  375.18   12.89
   0   2  10  327.22   11.74
   0  -2 -10  336.03   11.79
   0  -2 -10  309.78   11.72
   0  -4   6  115.29    5.74
   0   4  -6  148.28    5.49
   0  -4   6  140.90    5.54
   0  -4   6  146.91    5.51
   0  -4   6  138.13    5.40
   4  -2  -1 2905.45   98.98
  -4   2   1 2906.35   98.95
  -4   2   1 2959.15   99.01
   4  -2  -1 2873.53   98.80
   4  -2  -1 2952.45   98.92
  -4   2   1 2735.89   98.72
   2   1  10  773.67   28.22
  -2  -1 -10  754.36   28.27
  -2  -1 -10  835.09   28.09
   2   1  10  813.59   28.22
  -2  -1 -10  812.19   28.29
   2   1  10  876.97   28.26
   2   1  10  736.17   28.20
   2  -1   9  356.75   13.27
   2  -1   9  376.69   13.37
  -2   1  -9  349.59   13.45
  -2   1  -9  373.18   13.24
  -2   1  -9  381.23   13.30
   2  -1   9  377.02   13.24
   0   4   8  742.24   25.65
   0  -4  -8  728.65   25.77
   0  -4  -8  716.24   25.65
  -2   4  -3  375.84   13.53
   2  -4   3  381.46   13.81
  -2   4  -3  382.35   13.80
   2  -4   3  390.11   13.56
   0   5  -3 1276.86   43.62
   0  -5   3 1236.36   43.60
   0   5  -3 1257.17   43.60
   0  -5   3 1224.46   43.62
   3   2  -7   37.04    2.62
  -3  -2   7   39.37    2.36
  -3  -2   7   39.85    2.79
  -3  -2   7   39.20    2.61
  -4  -2   5   12.17    1.39
  -4  -2   5    6.61    2.48
   4   2  -5   15.33    2.12
  -4  -2   5   14.74    2.24
  -4  -2   5   16.42    1.78
   4   2  -5   12.06    2.17
   5   1   3  915.09   31.65
   5   1   3  916.83   31.40
   5   1   3  868.59   31.28
  -5  -1  -3  917.04   31.36
   5   1   3  868.25   31.37
   5   1   3  924.50   31.34
   2   2  10   13.02    2.42
   2   2  10   11.75    2.65
   2   2  10   10.74    2.38
  -2  -2 -10   11.81    1.83
   2   2  10    2.17    2.23
  -2   0   9  234.41    8.64
   2   0  -9  228.96    8.75
  -4   2  -2  236.22    8.59
   4  -2   2  239.31    8.72
  -4   2  -2  222.75    8.69
   4  -2   2  240.34    8.59
  -3  -5   2  386.07   12.13
   3   5  -2  364.93   12.08
   3   5  -2  377.51   12.05
   3   5  -2  381.61   11.86
  -3  -5   2  295.50   11.58
  -3  -5   2  368.64   12.34
  -3  -5   2  364.95   11.89
   3  -3  -4 1261.38   44.10
  -3   3   4 1268.60   44.19
   3  -3  -4 1279.89   44.31
  -3   3   4 1287.67   44.11
  -3   3   4 1227.34   44.35
  -1   5   3  296.23   10.89
   1  -5  -3  280.71   10.86
   1  -5  -3  297.01   10.78
  -1   5   3  306.22   10.91
   1  -5  -3  321.03   10.93
  -1   5   3  299.04   10.81
   2  -3  -7  652.34   23.34
  -2   3   7  685.97   23.16
   2  -3  -7  647.94   23.17
  -2   3   7  678.41   23.37
   2  -3  -7  629.40   23.43
  -2   2  -8  296.35   11.10
   2  -2   8  310.19   11.23
  -2   2  -8  300.83   11.34
  -2   2  -8  317.84   11.02
   2  -2   8  291.55   11.13
   2  -2   8  313.50   11.00
  -1   5  -1   15.84    2.55
  -1   5  -1   24.36    2.09
   1  -5   1   15.91    2.35
  -1   5  -1   16.79    2.21
   1  -5   1   18.29    2.24
   1  -5   1   28.42    2.16
  -1   5  -1   16.72    2.59
  -5  -3  -2  205.27    7.78
   5   3   2  211.36    8.20
   5   3   2  202.77    7.53
   5   3   2  217.03    7.83
  -5  -3  -2  214.21    7.69
   5   3   2  229.37    7.89
   5   3   2  207.37    7.78
   5   3   2  215.84    7.90
  -5  -1   1  599.82   20.39
   5   1  -1  630.81   20.37
   5   1  -1  633.39   20.67
   5   1  -1  601.42   20.45
   5   1  -1  591.09   20.64
   5   1  -1  572.83   20.28
   5   1  -1  532.86   20.22
   5   2  -1 1007.49   34.45
   5   2  -1 1029.28   34.60
  -5  -2   1  995.08   34.35
   5   2  -1  983.79   34.21
   5   2  -1  936.35   34.48
  -5  -2   1  941.37   34.21
   5   2  -1 1027.86   34.35
   4   4   6  376.15   13.47
  -4  -4  -6  385.13   13.18
  -4  -4  -6  349.20   13.45
   4   4   6  377.51   13.37
  -4  -4  -6  359.31   13.46
   5   3   1   92.87    3.74
   5   3   1  111.60    4.67
   5   3   1  116.74    4.96
   5   3   1  107.04    3.97
   5   3   1  103.57    4.35
   5   3   1  113.86    4.36
  -5  -3  -1  108.44    4.20
   5   3   1  111.70    4.29
  -5  -3  -1  112.64    4.05
   5   3   1  112.62    4.23
   5   2   4  356.44   12.89
  -5  -2  -4  370.07   13.12
  -5  -2  -4  375.02   12.93
   5   2   4  353.23   13.30
   5   2   4  376.50   13.13
   5   2   4  368.39   13.54
  -5  -2  -4  368.28   13.42
   1  -4  -7   25.98    2.20
  -1   4   7   30.78    1.56
  -1   4   7   30.40    2.22
   1  -4  -7   27.20    2.39
  -1   4   7   29.14    2.86
   1   2  -9  657.27   22.36
   1   2  -9  606.85   22.50
   0  -3   8  698.75   25.57
   0  -3   8  725.66   25.47
   0   3  -8  748.37   25.56
   0   3  -8  731.00   25.58
  -4   2   2  167.58    6.81
  -4   2   2  175.21    6.74
   4  -2  -2  164.79    6.37
   4  -2  -2  187.37    6.48
  -4   2   2  177.00    6.35
   4  -2  -2  194.25    6.74
   4  -2  -2  174.73    6.74
   1   0 -10   33.77    2.40
   5   3   3   83.49    4.20
  -5  -3  -3   87.09    3.58
   5   3   3   83.16    3.18
   5   3   3   77.17    3.70
  -5  -3  -3   86.49    3.72
  -5  -3  -3   91.61    3.98
   5   3   3   82.86    3.79
  -1  -3   8 1034.53   34.25
   1   3  -8  958.53   34.45
  -1  -3   8  971.15   34.46
  -1  -3   8  916.51   34.47
   1   3  -8  982.57   34.29
   0   1 -10  254.05    8.88
   0  -1  10  244.39    8.89
   0   1 -10  221.43    8.89
   0  -1  10  228.75    8.73
   0  -1  10  238.80    8.86
   0   1 -10  243.19    8.77
  -3  -4  -8  209.32    7.78
  -3  -4  -8  207.64    7.91
  -3  -4  -8  207.57    8.21
  -2  -4   6   11.29    2.44
  -2  -4   6    6.69    2.17
  -2  -4   6    5.77    0.71
   2   4  -6    7.92    2.39
  -2  -4   6    4.67    2.13
   2   4  -6   10.79    2.07
   1   5  -4  159.99    5.94
   1   5  -4  162.82    6.18
  -1  -5   4  154.23    6.02
  -1  -5   4  157.35    6.15
  -1  -5   4  133.08    6.18
  -1  -5   4  156.27    6.10
  -3   3  -4    9.25    2.33
  -3   3  -4    5.69    1.16
  -3   3  -4   11.17    2.20
   3  -3   4   10.01    1.96
  -1   1  10   51.51    2.74
   1  -1 -10   48.91    2.77
  -1   1  10   53.60    2.92
  -3   1  -8  291.72   10.49
  -3   1  -8  279.82   10.45
   3  -1   8  283.54   10.38
  -3   1  -8  296.49   10.86
   3  -1   8  279.77   10.80
   3  -1   8  309.07   10.53
  -2   1   9 2005.27   69.20
  -2   1   9 1933.69   69.35
   2  -1  -9 1987.95   69.20
   2  -1  -9 2039.05   69.41
  -3  -5  -6   45.21    2.47
  -3  -5  -6   36.21    2.68
  -3  -5  -6   37.25    1.66
   3   5   6   40.15    2.53
   3   3   9  732.62   25.10
  -3  -3  -9  674.79   24.95
  -3  -3  -9  761.84   24.66
  -2  -1   9  844.03   28.61
   2   1  -9  824.39   28.62
  -2  -1   9  769.03   28.76
   0  -5  -6 3061.62  116.23
   0   5   6 3442.04  116.21
   0  -5  -6 3426.14  116.19
   0  -5  -6 3294.03  116.11
   0   5   6 3452.85  116.09
   4   0   7  475.06   17.55
   4   0   7  496.41   17.31
  -4   0  -7  493.49   17.38
   4   0   7  497.56   17.39
   5   3   0  208.62    7.30
  -5  -3   0  185.07    7.13
   5   3   0  196.77    7.16
   5   3   0  191.63    7.65
   5   3   0  199.75    7.27
  -5  -3   0  183.08    7.59
   5   3   0  193.06    7.23
   1  -2   9  519.68   18.05
  -1   2  -9  515.32   18.07
   1  -2   9  522.36   18.08
   1  -2   9  482.24   18.07
  -1   2  -9  514.10   18.15
  -1   2  -9  499.19   18.07
   5   1   4   20.12    1.98
   5   1   4   19.66    2.01
   5   1   4   25.23    2.73
   5   1   4   26.22    1.73
  -5  -1  -4   16.63    1.77
  -2  -5  -7   27.10    2.52
  -2  -5  -7   30.03    2.50
  -2  -5  -7   22.47    1.73
   2   5   7   22.81    2.55
   2   5   7   26.75    2.49
  -5   0  -1   37.20    2.48
   5   0   1   35.44    2.27
   5   0   1   33.89    1.94
   5   0   1   36.84    1.83
   5   0   1   34.79    1.57
   5   0   1   36.34    1.63
  -5   0  -1   34.84    1.81
  -2   0 -10   58.72    3.25
   2   0  10   58.01    3.29
  -2   0 -10   61.81    3.44
   2   0  10   57.22    3.14
   2   0  10   49.03    3.25
  -2   0 -10   54.29    2.92
   2   0  10   61.62    3.07
   4  -2   3    4.43    2.17
   4  -2   3    9.25    1.90
  -4   2  -3    6.41    2.09
  -4   2  -3    6.37    1.77
   3   4  -5  193.95    7.24
  -3  -4   5  194.78    7.36
  -3  -4   5  186.44    7.47
  -3  -4   5  196.06    7.28
  -1  -5  -7   29.37    2.58
   1   5   7   24.76    2.82
  -1  -5  -7   27.43    1.94
   1   5   7   28.44    2.49
  -1  -5  -7   25.24    2.49
   2  -4  -5 1664.38   58.13
   2  -4  -5 1668.26   58.42
  -2   4   5 1666.21   58.38
   2  -4  -5 1607.40   58.35
  -2   4   5 1780.30   58.28
   2  -4  -5 1659.47   58.24
  -2   4   5 1664.02   58.47
   3   0   9  419.40   15.22
   3   0   9  433.98   15.00
  -3   0  -9  438.75   15.02
  -3   0  -9  378.48   15.27
  -3   0  -9  411.32   15.11
   3   0   9  429.36   15.03
   4   5   2  385.96   13.98
   4   5   2  401.07   14.04
   4   5   2  374.38   13.55
  -4  -5  -2  403.75   13.98
  -4  -5  -2  391.46   13.78
   4   5   2  361.34   14.20
   4   5   2  401.76   13.78
  -4  -5  -2  406.38   13.80
  -4  -5  -2  392.61   14.25
  -1  -3 -10 1020.56   36.20
  -1  -3 -10 1036.51   36.23
   1   3  10 1042.44   36.21
   5   0   0  579.22   19.84
   5   0   0  569.17   20.04
   5   0   0  550.65   19.86
   5   0   0  574.30   19.88
   5   0   2  644.41   22.16
   5   0   2  615.68   22.13
   5   0   2  646.57   22.10
   5   0   2  669.31   22.53
  -5   0  -2  650.73   22.20
   5   0   2  653.61   22.00
   5   0   2  604.64   21.92
  -5   0  -2  626.41   22.01
  -1   5   4 1148.81   38.46
   1  -5  -4 1104.55   38.34
   1  -5  -4 1101.04   38.42
   1  -5  -4 1042.78   38.42
  -1   5   4 1100.51   38.45
   4   2   8  458.48   15.81
   4   2   8  450.58   16.34
  -4  -2  -8  438.27   16.12
  -4  -2  -8  426.55   16.24
   4   2   8  440.57   16.12
  -4  -2  -8  456.85   15.79
   1  -1  10  772.37   26.65
  -1   1 -10  775.01   26.66
  -1   1 -10  755.53   26.66
   1  -1  10  747.06   26.62
  -1   1 -10  727.22   26.69
   1  -1  10  799.87   26.71
   1  -1  10  726.05   26.63
   4   4  -3  147.69    6.05
  -4  -4   3  151.86    6.27
  -4  -4   3  158.14    6.19
   4   4  -3  154.84    5.92
   4   4  -3  155.43    6.36
  -4  -4   3  167.33    6.08
   4   4  -3  165.09    6.22
  -1  -4  -9  484.71   16.84
   1   4   9  475.74   16.76
  -1  -4  -9  450.57   16.74
  -1  -4  -9  469.89   16.82
   1  -5   2 1080.92   37.40
   1  -5   2 1092.78   37.53
  -1   5  -2 1109.36   37.41
  -1   5  -2 1091.46   37.54
  -1   5  -2 1032.72   37.44
   1  -5   2 1018.84   37.43
   4   5   1 1753.62   59.84
   4   5   1 1786.61   59.71
   4   5   1 1614.90   59.98
  -4  -5  -1 1727.24   59.66
   4   5   1 1742.79   59.87
   4   5   1 1763.59   59.89
   4   5   1 1629.74   59.57
  -4  -5  -1 1822.80   59.85
   4   5   3  878.74   27.89
  -4  -5  -3  873.04   27.74
  -4  -5  -3  926.00   28.16
   4   5   3  893.19   28.11
   4   5   3  903.37   27.72
  -4  -5  -3  913.57   27.89
   4   5   3  908.49   27.94
  -4  -5  -3  929.82   27.71
  -5  -3  -4 1632.31   55.43
  -5  -3  -4 1614.94   55.29
   5   3   4 1637.46   55.30
   5   3   4 1532.90   55.02
  -5  -3  -4 1626.64   55.25
   5   3   4 1560.32   55.51
   5   3   4 1658.08   55.35
   5   1  -2   69.59    3.08
   5   1  -2   75.60    3.42
   5   1  -2   70.06    3.37
  -5  -1   2   67.65    2.86
   5   1  -2   81.43    3.03
   5   1  -2   69.36    2.78
  -5  -1   2   77.16    3.05
  -5  -2   2  338.85   11.41
  -5  -2   2  373.30   11.41
   5   2  -2  302.74   11.60
  -5  -2   2  316.46   11.13
   5   2  -2  331.36   11.52
   5   2  -2  281.25   11.11
   5   2  -2  313.17   11.35
  -2  -5   4    6.27    2.02
   2   5  -4    3.80    2.15
   2   5  -4    3.68    1.89
  -2  -5   4    3.25    2.65
   2   5  -4    3.07    2.21
  -2  -5   4    4.21    2.22
   2   5  -4    4.35    2.30
  -2  -5   4    3.65    0.90
   2   4   9   13.22    2.38
  -2  -4  -9    5.64    2.47
  -2  -4  -9    8.46    2.32
  -2  -4  -9   18.18    2.33
  -2  -4  -9   11.59    2.56
   2  -4   4  686.66   25.83
  -2   4  -4  747.69   25.80
  -2   4  -4  743.88   25.57
  -3   0   8   14.39    1.60
   3   0  -8   12.43    2.41
   3   0  -8   13.01    1.42
  -3   0   8   16.58    2.48
  -3   0   8   16.33    1.42
  -4   1  -6  410.23   14.85
   4  -1   6  434.31   14.91
  -4   1  -6  416.69   14.91
   4  -1   6  417.07   14.66
   4  -2  -3    4.36    2.11
   4  -2  -3    4.40    1.05
  -4   2   3    2.35    2.08
   4  -2  -3    0.88    2.12
  -4   2   3    2.11    1.39
  -4   1   5   55.15    2.77
   4  -1  -5   51.95    2.92
  -4   1   5   57.52    2.90
   4  -1  -5   52.02    3.17
   4  -1  -5   56.40    3.01
   5   2   5   27.71    2.78
  -5  -2  -5   23.43    1.67
   5   2   5   22.29    1.56
   5   2   5   29.65    2.51
  -5  -2  -5   25.38    2.45
  -5  -2  -5   33.21    3.06
  -4  -1  -8 2174.35   74.24
   4   1   8 2086.00   74.41
   4   1   8 2135.11   74.40
   4   1   8 2168.70   74.24
   4   1   8 2086.74   74.32
   2   3  10  419.91   14.67
   2   3  10  435.18   14.58
   2   3  10  425.30   14.53
  -2  -3 -10  343.34   14.45
   4   1  -6    3.35    1.75
  -4  -1   6    1.19    2.35
   4   1  -6    4.52    2.00
  -4  -1   6    4.18    0.96
  -4  -1   6    0.57    2.22
  -1   3   9  191.11    7.19
   1  -3  -9  180.28    6.85
  -1   3   9  181.12    6.89
   5   0  -1 1680.95   55.80
   5   0  -1 1631.83   55.62
   5   0  -1 1600.14   55.65
   5   0  -1 1663.52   55.88
  -5   0   1 1587.64   55.63
   5   0  -1 1550.60   55.55
   5   3  -1   66.76    3.36
  -5  -3   1   65.94    2.90
  -5  -3   1   62.54    3.64
   5   3  -1   66.10    3.11
   5   3  -1   67.05    3.01
   5   3  -1   70.36    3.87
  -3  -1   8 1969.11   68.87
   3   1  -8 1958.70   68.88
  -3  -1   8 1999.01   68.79
   0  -5   4  912.92   31.78
   0   5  -4  886.50   31.79
   0   5  -4  924.91   31.82
   0  -5   4  903.76   31.82
   5   0   3   15.46    2.02
  -5   0  -3   17.64    1.30
   5   0   3   17.29    1.84
   5   0   3   17.27    2.81
  -5   0  -3   14.69    2.04
   5   0   3   10.72    0.95
   5   0   3   20.98    1.95
   1   1 -10  179.61    6.63
  -1  -1  10  171.49    6.64
   2   6   2  424.33   14.67
  -2  -6  -2  415.77   14.66
   2   6   2  405.38   14.93
  -2  -6  -2  408.48   14.91
   2   6   2  409.45   14.91
   2   6   2  412.43   15.01
   2   6   2  420.05   14.95
   3   5  -3   55.57    3.33
   3   5  -3   57.09    3.31
  -3  -5   3   56.21    2.94
  -3  -5   3   60.63    3.62
  -3  -5   3   61.94    3.19
   3   5  -3   68.16    2.89
  -3  -5   3   54.85    3.66
  -3   3   5   43.64    2.59
   3  -3  -5   41.40    2.08
  -3   3   5   37.55    2.88
   3  -3  -5   36.87    2.80
  -3   3   5   43.41    2.09
   4   5   0  792.69   26.98
   4   5   0  778.37   26.83
  -4  -5   0  742.59   26.84
   4   5   0  800.24   27.17
   4   5   0  732.93   27.26
   4   5   0  749.68   27.15
   4   5   0  756.67   27.06
  -4  -5   0  807.18   27.09
  -4  -5  -4   57.31    2.84
  -4  -5  -4   52.96    3.21
   4   5   4   54.82    3.19
  -4  -5  -4   42.42    2.71
   4   5   4   60.42    2.68
   1   6   2  434.82   15.48
   1   6   2  428.11   15.53
  -1  -6  -2  413.69   15.53
  -1  -6  -2  442.63   15.29
  -1  -6  -2  432.23   15.56
   1   6   2  421.89   15.55
   1   6   2  438.91   15.32
   1   6   2  426.15   15.52
   2   6   1  126.95    5.23
  -2  -6  -1  124.85    4.88
   2   6   1  124.69    4.86
   2   6   1  120.14    5.30
   2   6   1  129.64    5.30
   2   6   1  130.51    5.32
  -2  -6  -1  124.33    5.20
  -1   4  -6  739.95   26.25
   1  -4   6  754.08   26.28
   1  -4   6  765.63   26.40
  -1   4  -6  731.67   26.40
   3  -2   7  186.96    6.73
   3  -2   7  181.45    7.01
  -3   2  -7  182.45    6.78
   3  -2   7  188.51    7.30
  -3   2  -7  182.31    7.01
   1   6   1   62.07    3.42
  -1  -6  -1   62.87    3.53
   1   6   1   69.33    3.59
   1   6   1   52.41    3.38
  -1  -6  -1   61.67    3.35
  -1  -6  -1   63.93    3.00
   1   6   1   63.57    3.01
  -1  -6  -1   61.44    3.55
   1  -3   8  892.54   31.57
  -1   3  -8  913.23   31.59
   1  -3   8  897.77   31.64
   2   6   3    1.93    1.54
   2   6   3    3.29    2.30
   2   6   3    1.18    2.37
   2   6   3   -0.29    2.30
  -2  -6  -3    1.62    1.47
  -2  -6  -3    1.78    2.10
   2   6   3    3.37    2.41
  -4   0   6  504.82   16.65
   4   0  -6  490.97   16.66
  -4   0   6  503.03   16.76
   4   0  -6  475.32   16.41
   4   0  -6  502.83   16.49
   4   0  -6  441.45   16.29
   4   3   8  695.84   24.82
   4   3   8  708.22   24.65
  -4  -3  -8  667.02   24.59
  -4  -3  -8  680.77   24.41
   4   3   8  704.96   24.66
  -4  -3  -8  668.54   24.61
  -4  -3  -8  703.34   24.70
  -4  -3  -8  716.29   24.27
   4   3  -5 1511.55   50.95
  -4  -3   5 1439.52   50.94
   4   3  -5 1485.96   50.92
  -4  -3   5 1436.79   50.84
  -4  -3   5 1473.48   50.76
  -4  -3   5 1388.32   51.04
   5   1   5  150.22    5.08
   5   1   5  140.61    5.33
  -5  -1  -5  117.65    4.77
   5   1   5  132.57    5.74
   5   1   5  144.93    5.27
  -5  -1  -5  148.86    5.07
  -4  -4  -7  192.42    7.31
  -4  -4  -7  175.63    7.33
  -4  -4  -7  191.26    6.97
   4   4   7  176.61    7.54
   4   4   7  193.69    7.32
   4   4   7  195.21    7.27
   4  -2   4   15.05    2.21
  -4   2  -4   14.58    2.11
  -4   2  -4   18.79    2.23
  -1   2  10  268.33    9.66
  -1   2  10  264.21    9.87
   1  -2 -10  258.23   10.03
   1  -2 -10  265.39    9.69
   0  -3 -10  381.01   13.38
   0  -3 -10  354.42   13.49
   0  -3 -10  389.40   13.32
   0   3  10  377.66   13.35
   0   3  10  341.32   13.51
  -2   3  -7   52.52    3.05
   2  -3   7   55.62    3.27
   2  -3   7   55.98    2.77
  -2   3  -7   51.55    2.76
   1   6   3   32.57    2.86
   1   6   3   41.57    2.42
  -1  -6  -3   29.61    2.81
   1   6   3   38.74    2.91
  -1  -6  -3   38.29    2.27
   1   6   3   35.53    3.07
   1   6   3   39.04    2.43
   1   6   3   35.11    2.91
  -1  -6  -3   39.60    2.81
   1   1  11 1053.08   37.50
   1   1  11 1091.16   37.51
  -1  -1 -11 1080.80   37.51
  -1  -1 -11 1064.06   37.50
  -1  -1 -11 1080.79   37.45
  -1  -1 -11 1044.97   37.61
  -3   2   7   78.62    3.67
   3  -2  -7   74.37    3.81
  -3   2   7   77.84    3.04
   3  -2  -7   76.53    3.08
   3  -2  -7   76.68    3.80
   1   4  -7  261.51    9.46
  -1  -4   7  256.51    9.18
  -1  -4   7  246.66    9.44
   1   4  -7  261.14    9.50
  -1  -4   7  252.87    9.58
  -1  -4   7  261.39    9.53
   5   3   5  656.93   19.38
  -5  -3  -5  636.63   19.26
   5   3   5  562.90   18.90
  -5  -3  -5  645.22   19.31
  -5  -3  -5  635.24   19.50
   5   3   5  654.38   19.32
   1   6   0 1023.26   35.60
   1   6   0 1023.24   35.64
  -1  -6   0 1006.96   35.60
  -1  -6   0 1023.86   35.48
  -1  -6   0  991.70   35.67
  -1  -6   0  977.60   35.63
   1   6   0 1040.36   35.48
  -2  -6   0 1801.65   63.53
  -2  -6   0 1849.19   63.28
  -2  -6   0 1744.13   63.47
   2   6   0 1838.52   63.27
   2   6   0 1833.62   63.48
   2   6   0 1831.52   63.45
   2   6   0 1849.23   63.46
  -2  -6   0 1744.62   63.52
   2   6   0 1795.66   63.51
  -2  -6   0 1861.44   63.45
   1  -5  -5    8.24    2.18
  -1   5   5   11.75    2.27
  -1   5   5    7.98    0.97
  -1   5   5   11.97    2.14
   1  -5  -5    9.60    2.06
   2   3  -8 1146.09   40.10
  -2  -3   8 1163.28   40.39
   2   3  -8 1157.77   40.35
  -3   3  -5 1586.75   54.56
   3  -3   5 1565.38   54.76
  -3   3  -5 1565.59   54.57
   3  -3   5 1570.31   54.34
  -3   3  -5 1550.12   54.33
   3  -3   5 1558.29   54.54
   4   2  -6    3.37    2.09
  -4  -2   6    3.62    0.67
  -4  -2   6    0.34    2.71
  -4  -2   6    3.93    1.57
   4   2  -6    6.32    2.15
  -4  -2   6    2.15    2.28
  -4  -2   6    4.53    1.38
  -3  -5  -7  307.25   10.99
  -3  -5  -7  327.24   11.74
  -3  -5  -7  324.80   11.48
   3   5   7  302.58   11.33
  -3  -5  -7  323.97   11.33
   5   0  -2   16.26    1.75
  -5   0   2   22.98    1.47
   5   0  -2   20.46    2.42
   5   0  -2   22.65    2.27
   5   0  -2   18.24    1.73
  -5   0   2    9.47    1.73
  -1   5  -3   87.27    4.05
   1  -5   3   96.93    4.07
   1  -5   3   93.14    4.31
  -1   5  -3   93.58    4.12
   1  -5   3   96.47    4.10
  -1   5  -3   94.80    4.37
   2   6   4  157.53    5.99
  -2  -6  -4  160.76    5.95
   2   6   4  153.64    6.37
  -2  -6  -4  167.85    6.42
   2   6   4  170.10    6.42
   2   6   4  161.33    6.47
   0   1  11    0.26    2.06
   0  -1 -11    3.47    2.31
   0   1  11    3.20    1.78
   0  -1 -11    4.68    2.27
  -3  -3   7  674.97   22.87
  -3  -3   7  681.66   23.00
   3   3  -7  645.59   22.59
  -3  -3   7  637.93   22.98
   3   3  -7  612.58   22.91
  -3   1   8  429.59   14.96
  -3   1   8  408.45   15.24
   3  -1  -8  438.35   15.33
   5   4   2 3805.68  133.79
   5   4   2 3959.83  134.06
   5   4   2 4065.45  134.06
  -5  -4  -2 3991.27  134.03
   5   4   2 3884.34  133.94
   5   4   2 4054.53  134.01
  -5  -4  -2 3902.89  134.26
  -5  -4  -2 3902.64  134.00
   5   4   2 3690.15  133.77
   0  -4   7    4.35    2.19
   0  -4   7    3.70    2.15
   0   4  -7    6.35    2.22
   0  -4   7    2.58    2.43
   0  -4   7    4.17    1.84
   5   0   4  384.64   13.42
   5   0   4  375.68   13.79
   5   0   4  402.97   13.36
  -5   0  -4  399.08   13.16
  -5   0  -4  389.04   13.34
   5   0   4  338.54   13.09
   3   2  10   11.93    2.64
  -3  -2 -10   10.17    1.74
   3   2  10   11.43    2.54
   0   4   9  827.51   28.87
   0  -4  -9  831.01   28.90
   0   4   9  809.57   29.09
   0  -4  -9  813.18   29.03
   5   1  -3 1431.54   51.14
   5   1  -3 1440.00   51.00
  -5  -1   3 1470.15   51.06
   5   1  -3 1496.60   51.23
   5   1  -3 1485.81   51.06
  -5  -1   3 1478.52   51.00
  -2   2   9  779.83   26.55
   2  -2  -9  786.81   26.84
   2  -2  -9  710.72   26.40
  -2   2   9  810.29   26.76
   2  -2  -9  827.33   26.85
   0   5   7  115.08    4.97
   0   5   7  128.94    4.65
   0  -5  -7  108.84    4.81
   0  -5  -7  117.06    5.14
   0  -5  -7  113.83    4.79
   2   2  -9   12.49    1.54
  -2  -2   9   10.24    1.90
   4   5  -1    7.75    2.23
   4   5  -1    9.70    2.05
  -4  -5   1    9.84    1.10
   4   5  -1    8.36    1.56
   4   5  -1    8.94    2.24
  -4  -5   1    8.42    2.12
   4   5  -1   11.67    2.60
  -4  -5   1    2.95    2.22
   4   5  -1    6.16    2.38
   4   5   5  925.48   30.95
  -4  -5  -5  839.79   30.93
  -4  -5  -5  889.62   30.74
  -4  -5  -5  862.37   30.85
   4   5   5  878.07   30.77
   1   2  11  374.75   13.03
  -1  -2 -11  341.81   13.01
   1   2  11  368.07   13.06
  -1  -2 -11  357.74   13.06
   5   4   1  127.85    5.30
  -5  -4  -1  126.05    5.66
   5   4   1  123.55    4.98
   5   4   1  136.00    5.18
   5   4   1  128.84    4.74
   5   4   1  130.05    5.26
  -5  -4  -1  124.05    5.16
   5   3  -2   77.31    3.99
  -5  -3   2   75.90    3.10
  -5  -3   2   73.66    3.43
  -5  -3   2   73.10    3.70
   5   3  -2   72.49    3.24
   5   3  -2   72.39    3.57
   5   3  -2   67.16    3.08
  -5  -3   2   69.34    3.57
   5   4   3  906.70   32.22
   5   4   3  898.25   32.15
   5   4   3  896.80   32.14
  -5  -4  -3  983.82   32.53
   5   4   3 1014.06   32.56
   5   4   3  991.48   32.44
   5   4   3 1025.86   32.51
  -5  -4  -3  984.26   32.51
  -5  -4  -3  983.92   32.84
  -2   4   6 2471.39   81.92
   2  -4  -6 2351.47   81.91
   2  -4  -6 2299.63   82.08
   2  -4  -6 2354.89   82.02
  -2   4   6 2322.51   82.06
  -2   4   6 2285.58   82.12
   3   1  10   49.69    3.07
  -3  -1 -10   49.34    2.58
   3   1  10   51.99    2.70
   3   1  10   48.54    3.16
   5   2  -3  475.83   16.70
  -5  -2   3  444.36   16.69
   5   2  -3  506.02   16.97
  -5  -2   3  499.97   16.99
  -5  -2   3  503.82   16.92
   5   2  -3  497.84   17.19
  -1  -6  -4    4.28    1.78
   1   6   4    0.48    1.86
  -1  -6  -4    3.57    2.20
  -1  -6  -4    3.14    2.35
   1   6   4    3.43    2.09
   1   6   4    3.57    2.04
   1   6   4    4.00    2.53
   1   6   4    1.51    2.27
  -1  -5   5  207.54    7.54
   1   5  -5  195.04    7.59
  -1  -5   5  195.51    7.51
  -1  -5   5  195.09    7.30
  -1  -5   5  202.55    7.67
  -1  -5   5  191.26    7.71
   1   5  -5  200.23    7.47
   1  -4  -8  440.23   15.34
   1  -4  -8  422.28   15.44
  -1   4   8  423.50   15.07
  -1   4   8  442.77   15.36
  -1   4   8  440.87   15.61
  -4   2   4  392.56   12.92
   4  -2  -4  346.00   12.71
   4  -2  -4  371.32   13.02
   4  -2  -4  384.21   13.11
   2  -3  -8 1370.50   50.89
   2  -3  -8 1450.26   50.67
  -2   3   8 1552.15   50.67
  -2   3   8 1381.99   50.86
   0   0 -11  725.65   25.70
   0   0 -11  734.15   25.84
   0   0  11  735.95   25.71
   0   0 -11  721.83   25.72
   1   0  11  217.75    8.13
  -1   0 -11  216.43    8.16
   1   0  11  221.57    8.08
   1   0  11  211.35    8.16
  -1   0 -11  207.54    8.22
  -1   0 -11  209.48    8.04
  -5  -2  -6  486.10   17.45
   5   2   6  483.06   17.32
   5   2   6  483.60   16.88
   5   2   6  474.82   17.19
  -5  -2  -6  468.20   17.17
  -5  -2  -6  486.65   16.89
  -2  -5  -8  126.99    5.55
  -2  -5  -8  139.24    5.12
  -2  -5  -8  133.75    5.59
   2   5   8  138.10    5.55
  -2  -5  -8  139.57    5.81
   2   5   8  130.66    5.59
  -3  -2   8  253.85    9.51
  -3  -2   8  261.92    9.47
  -3  -2   8  257.30    9.18
  -3  -2   8  263.80    9.35
   3   2  -8  236.89    9.54
   4   4  -4  545.41   18.47
  -4  -4   4  453.44   18.72
  -4  -4   4  492.04   18.56
   4   4  -4  531.44   18.60
   4   4  -4  515.37   18.59
  -4  -4   4  532.47   18.53
  -4  -4   4  543.31   18.43
   4   4  -4  520.03   18.39
  -1  -6   1 1850.89   64.33
   1   6  -1 1845.51   64.33
  -1  -6   1 1834.85   64.37
   1   6  -1 1827.06   64.34
  -1  -6   1 1843.80   64.32
  -1  -6   1 1887.38   64.39
   1   6  -1 1875.78   64.22
  -1  -6   1 1804.27   64.20
  -1  -5  -8   93.26    4.32
   1   5   8   94.55    4.09
   1   5   8   85.24    4.33
  -1  -5  -8   97.78    3.91
  -1  -5  -8   84.52    4.19
  -3  -4  -9  231.73    8.14
  -3  -4  -9  216.56    8.82
  -3  -4  -9  226.78    8.61
  -3  -4  -9  223.84    8.47
   3   6   2    8.13    2.33
   3   6   2    8.55    2.27
  -3  -6  -2    7.64    2.51
   3   6   2    9.24    1.43
   3   6   2   10.00    2.45
  -3  -6  -2    8.53    1.49
   3   6   2    8.84    2.87
  -3  -6  -2    8.66    2.08
  -3  -6  -2    8.85    1.74
   2   6  -1    7.64    1.81
   2   6  -1   10.57    2.39
  -2  -6   1    2.39    2.74
  -2  -6   1    5.25    2.48
  -2  -6   1    1.79    2.87
  -2  -6   1    7.08    2.29
  -2  -6   1    6.40    1.99
   2   6  -1    6.43    2.65
   2   6  -1    6.99    2.41
  -3   4   0  173.81    6.97
   3  -4   0  167.85    6.97
   3  -4   0  189.89    6.78
   4   0   8  143.79    5.43
   4   0   8  115.07    5.74
  -4   0  -8  142.70    5.46
   4   0   8  145.43    5.33
  -2   4  -5  253.39    9.47
  -2   4  -5  258.90    9.20
   2  -4   5  233.70    9.53
   2  -4   5  262.42    9.27
   3  -4  -1  704.63   25.35
  -3   4   1  700.42   25.36
   3  -4  -1  740.46   25.22
  -5  -4   0  197.90    7.84
  -5  -4   0  197.54    7.41
   5   4   0  201.10    7.27
   5   4   0  200.72    7.19
   5   4   0  204.90    7.57
   5   4   0  192.57    7.46
   5   4   0  193.61    7.59
  -2   1 -10 1829.26   64.71
  -2   1 -10 1932.76   64.77
   2  -1  10 1809.15   64.83
   2  -1  10 1825.79   64.70
  -2   1 -10 1881.27   64.87
   2  -1  10 1888.50   64.74
   2  -1  10 1849.69   64.79
  -5  -4  -4  326.36   12.30
  -5  -4  -4  315.51   11.46
   5   4   4  314.08   11.47
   5   4   4  330.23   11.87
   5   4   4  362.78   11.81
  -5  -4  -4  349.50   11.88
  -5  -4  -4  340.78   11.92
   3   6   3  623.66   22.10
   3   6   3  664.26   22.56
  -3  -6  -3  640.96   22.25
  -3  -6  -3  643.36   22.36
   3   6   3  625.14   22.55
   3   6   3  629.25   22.40
  -3  -6  -3  633.27   22.46
  -3  -6  -3  625.18   22.10
  -3  -6  -1  583.31   20.85
  -3  -6  -1  603.04   21.17
   3   6   1  594.63   21.21
   3   6   1  612.58   20.85
   3   6   1  605.63   21.24
   3   6   1  581.18   21.15
   3   6   1  592.50   21.09
  -3  -6  -1  586.78   21.07
  -3  -6  -1  592.42   20.85
  -2   2  -9   36.84    2.80
  -2   2  -9   28.35    2.59
  -2   2  -9   35.25    3.24
   2  -2   9   54.23    2.75
   2  -2   9   40.48    2.86
   2  -2   9   29.42    2.89
   0  -2  10   60.99    3.17
   0   2 -10   48.43    3.16
   0   2 -10   53.67    3.01
   0   2 -10   49.24    3.03
   0  -2  10   54.87    2.85
  -2  -1 -11 1295.43   45.12
   2   1  11 1222.24   45.03
  -2  -1 -11 1351.12   44.93
  -2  -1 -11 1275.84   45.08
   2   1  11 1305.55   45.04
   2   1  11 1283.35   45.04
   2   1  11 1258.09   45.04
   0  -2 -11 1734.10   61.32
   0  -2 -11 1834.65   61.38
   0   2  11 1718.52   61.33
   2   6   5    3.09    2.32
  -2  -6  -5    4.78    2.27
   2   6   5    4.74    2.47
   2   6   5    2.88    2.45
  -2  -6  -5    2.38    1.50
   2   6   5    3.52    1.55
  -3  -4   6  570.96   20.22
   3   4  -6  575.96   20.02
  -3  -4   6  551.01   20.03
  -2  -4   7  456.73   15.79
   2   4  -7  433.57   15.76
   2   4  -7  426.57   15.72
  -2  -4   7  442.88   15.71
  -2  -4   7  435.97   15.81
  -3   4  -1 1301.86   44.37
   3  -4   1 1275.56   44.64
   3  -4   1 1239.86   44.56
  -3   4  -1 1259.08   44.62
   2   2  11   86.62    4.10
   2   2  11   84.08    4.20
  -2  -2 -11   86.26    3.68
   2   2  11   84.07    3.93
   2   2  11   74.23    4.01
   0  -6  -1  325.47   11.76
   0  -6  -1  341.12   12.01
   0   6   1  340.25   11.89
   0  -6  -1  313.36   11.76
   0   6   1  318.29   11.79
   0  -6  -1  328.36   11.92
   0   6   1  326.83   11.98
   0  -6  -2  934.90   32.47
   0  -6  -2  915.63   32.30
   0   6   2  931.20   32.39
   0  -6  -2  916.49   32.41
   0   6   2  929.02   32.33
   0   6   2  908.89   32.45
  -2  -5   5   68.49    3.81
  -2  -5   5   67.62    3.47
   2   5  -5   78.98    3.71
  -2  -5   5   71.86    3.62
   2   5  -5   73.26    3.39
  -2  -5   5   62.78    3.49
  -2  -5   5   64.84    2.59
   5   1   6  149.91    5.39
   5   1   6  142.60    5.68
  -5  -1  -6  141.08    5.22
  -5  -1  -6  143.31    6.15
  -5  -1  -6  149.05    5.42
   5   1   6  144.04    5.99
   5   1   6  125.44    5.68
   5  -1   1  400.03   14.05
  -5   1  -1  404.00   14.26
   5  -1   1  382.83   14.21
  -5   1  -1  398.74   14.06
  -3   4   2  227.95    9.05
   3  -4  -2  230.69    9.03
  -3   4   2  248.29    8.88
   3  -4  -2  241.25    8.81
  -3   4   2  246.45    8.59
  -5  -3  -6  440.83   15.54
  -5  -3  -6  456.76   15.91
   5   3   6  440.45   15.53
  -5  -3  -6  420.14   15.54
  -5  -3  -6  475.92   16.12
   5   3   6  482.35   15.99
   5   3   6  480.97   16.03
  -5  -3  -6  488.52   15.98
   4  -2   5    1.17    2.89
   4  -2   5   -0.66    0.74
  -4   2  -5   -0.02    0.83
  -4   2  -5   -0.73    1.98
  -4   2  -5    1.25    2.01
   4  -2   5    0.61    2.11
   4  -1   7  752.02   26.16
   4  -1   7  723.18   26.35
  -4   1  -7  789.63   26.36
   4  -1   7  723.21   26.62
   3   5  -4    8.39    2.43
  -3  -5   4    8.97    2.16
   3   5  -4    8.95    2.00
  -3  -5   4   12.01    2.27
  -3  -5   4    4.42    2.61
  -3  -5   4   11.95    2.43
  -2   0  10  249.66    8.63
   2   0 -10  204.24    8.59
   3  -1   9   18.92    2.33
  -3   1  -9   22.33    2.19
   3  -1   9   19.45    2.79
   3  -1   9   18.57    2.01
  -3   1  -9   25.42    2.26
  -3   1  -9   14.92    2.97
  -3   3   6  309.74   10.02
  -3   3   6  259.08    9.88
   3  -3  -6  287.25   10.41
  -3   3   6  287.59   10.25
   3  -3  -6  283.31    9.99
   4  -1  -6   19.56    2.21
   4  -1  -6   17.29    1.38
  -4   1   6   24.75    2.28
   4  -1  -6   23.34    2.31
  -4   1   6   21.97    2.25
   3   3  10 1002.16   35.54
  -3  -3 -10 1011.54   35.18
   3   3  10 1010.70   35.57
   0   5  -5 1477.02   50.90
   0  -5   5 1472.57   50.93
   0  -5   5 1438.01   50.91
   0   5  -5 1447.44   50.88
   5  -1   0  280.40    8.37
   5  -1   0  250.73    8.57
  -5   1   0  261.52    8.61
  -5   1   0  270.15    8.41
   5  -1   0  212.32    8.07
  -5   1   0  212.06    8.05
  -5   0   3  838.84   29.03
   5   0  -3  798.99   29.15
   5   0  -3  809.75   29.04
  -5   0   3  839.50   28.92
   5   0  -3  827.36   29.00
   5   0  -3  858.86   29.17
  -4  -2  -9   67.85    3.60
  -4  -2  -9   69.69    3.90
   4   2   9   73.35    4.27
   4   2   9   72.37    3.77
   4   2   9   70.64    3.74
  -4  -2  -9   77.25    3.12
   4   2   9   74.81    3.17
   0   3  -9    6.98    2.22
   0   3  -9   10.13    2.14
   0  -3   9    7.12    2.42
   0  -3   9    9.09    1.85
  -1  -6  -5   21.35    2.60
   1   6   5   23.21    2.17
   1   6   5   20.78    2.21
   1   6   5   29.13    2.67
  -1  -6  -5   21.44    2.00
   1   6   5   22.12    2.75
   1   6   5   20.61    2.62
  -1  -6  -5   24.97    2.61
  -5   0  -5  198.06    7.01
   5   0   5  184.47    6.93
  -5   0  -5  206.84    7.26
   5   0   5  198.82    7.22
   5   0   5  193.24    7.38
  -3  -6  -4  249.78    9.93
  -3  -6  -4  268.72    9.44
   3   6   4  276.04   10.03
  -3  -6  -4  262.62    9.80
  -3  -6  -4  271.81    9.71
   3   6   4  272.10    9.45
   3   6   4  257.40    9.84
   3   6   4  250.68   10.01
   5  -1   2  179.40    6.11
   5  -1   2  153.94    6.32
  -5   1  -2  158.84    6.09
  -5   1  -2  155.20    6.33
  -4  -5   2 1326.69   43.95
   4   5  -2 1155.69   43.91
  -4  -5   2 1307.51   43.86
   4   5  -2 1288.63   43.71
   4   5  -2 1252.56   43.80
   4   5  -2 1235.74   43.86
   4   5  -2 1181.61   43.99
   0  -6   0 1254.15   44.05
   0   6   0 1254.16   44.21
   0  -6   0 1283.23   44.06
   0  -6   0 1264.02   44.18
   0   6   0 1263.18   44.11
   0  -6   0 1298.95   44.18
   0   6   0 1223.01   44.08
  -4  -5  -6  471.74   15.96
  -4  -5  -6  469.04   16.24
   4   5   6  440.51   15.99
  -4  -5  -6  426.47   16.13
   4   5   6  441.64   16.15
   0   6   3  100.63    4.37
   0  -6  -3   95.12    4.40
   0  -6  -3   86.19    4.51
   0   6   3   98.25    4.26
   0  -6  -3  102.33    4.49
   0  -6  -3   99.76    4.19
   0   6   3  106.69    4.38
   3   6   0  128.93    5.41
  -3  -6   0  116.09    4.57
  -3  -6   0  119.78    5.44
  -3  -6   0  124.97    5.26
  -3  -6   0  128.69    4.74
   3   6   0  121.11    4.68
   3   6   0  113.41    5.42
   3   6   0  121.80    5.25
   3   6   0  118.44    5.08
   1  -5  -6  175.69    7.00
   1  -5  -6  184.54    6.98
  -1   5   6  191.27    7.04
  -2   5   1  157.49    6.19
  -2   5   1  128.40    6.03
   2  -5  -1  153.51    6.16
   2  -5  -1  161.05    6.01
   2  -5  -1  152.83    5.97
  -2   5   1  156.17    6.20
   2  -5  -1  145.59    5.52
  -2   5   1  169.47    5.76
   1   3  -9   40.04    2.86
  -1  -3   9   42.71    3.10
  -1  -3   9   48.48    2.35
   1   3  -9   44.24    2.48
   1   2 -10 1338.16   47.77
   1   2 -10 1385.03   47.62
  -5   1   1    5.15    1.07
   5  -1  -1    4.46    1.67
   5  -1  -1    4.41    1.08
  -5   1   1    4.98    1.83
   5  -1  -1    3.85    1.06
   5  -1  -1    4.23    2.06
   5   4  -1  355.50   12.79
   5   4  -1  357.35   12.68
   5   4  -1  343.85   12.97
   5   4  -1  364.89   12.66
  -5  -4   1  356.71   12.80
   5   4  -1  365.73   12.95
  -5  -4   1  345.41   13.15
   2  -5   0  418.64   14.99
  -2   5   0  387.21   14.95
  -2   5   0  415.44   14.98
   2  -5   0  432.86   14.90
   2  -5   0  415.64   14.87
  -4  -4  -8  323.75   12.43
   4   4   8  386.00   12.98
  -4  -4  -8  410.43   12.76
  -4  -4  -8  358.68   13.29
  -4  -4  -8  402.61   13.05
   4   4   8  397.83   13.23
  -4  -4  -8  375.60   13.02
   4   4   8  367.61   12.96
  -1   5  -4  558.24   19.34
   1  -5   4  561.49   19.41
   1  -5   4  511.72   19.33
   1  -5   4  532.80   19.50
  -1   5  -4  572.26   19.51
  -2   1  10  250.65    8.59
   2  -1 -10  224.00    8.97
   2  -1 -10  233.40    8.61
  -2   1  10  224.70    8.80
  -1  -4 -10  321.36   11.91
  -1  -4 -10  318.16   11.90
   1   4  10  333.23   11.84
  -1  -4 -10  323.78   11.96
  -2   5   2  229.16    9.19
   2  -5  -2  239.71    9.25
  -2   5   2  250.62    9.12
  -2   5   2  251.21    8.88
  -2   5   2  252.58    9.31
   2  -5  -2  243.96    9.13
   2  -5  -2  244.71    9.06
  -3   4  -2  403.96   14.64
  -3   4  -2  419.05   14.29
   3  -4   2  402.47   14.64
   3  -4   2  398.69   14.58
   3  -4   2  397.78   14.32
   4   1   9   10.70    2.16
   4   1   9    7.51    2.32
   4   1   9    6.52    2.41
   4   1   9    8.36    1.81
  -4  -1  -9    8.95    1.76
   5   3  -3  199.43    8.49
  -5  -3   3  227.17    8.25
   5   3  -3  212.87    7.99
  -5  -3   3  212.23    8.30
  -5  -3   3  224.88    7.99
  -5  -3   3  218.41    8.39
   5   3  -3  215.82    8.26
   5   3  -3  214.17    8.43
   5   3  -3  245.22    8.09
  -3   0 -10  161.45    6.01
   3   0  10  160.68    6.04
  -3   0 -10  146.94    6.28
   3   0  10  152.23    6.07
  -3   0 -10  164.41    6.43
   3   0  10  150.79    6.25
  -5  -4  -5    1.14    1.11
   5   4   5    0.05    2.08
  -5  -4  -5    0.54    3.14
   5   4   5   -0.91    2.18
  -5  -4  -5    2.93    2.31
  -5  -4  -5    4.81    2.36
  -1  -6   2  394.40   14.07
   1   6  -2  396.58   13.84
   1   6  -2  386.38   14.00
  -1  -6   2  371.03   14.01
  -1  -6   2  399.97   13.99
   1   6  -2  359.85   14.02
  -1  -6   2  391.19   13.86
   4   1  -7  247.72    9.13
  -4  -1   7  239.60    9.17
  -4  -1   7  246.31    8.73
  -4  -1   7  233.07    9.29
   4   1  -7  256.38    8.96
   5   1  -4  310.14   11.09
   5   1  -4  297.13   11.08
  -5  -1   4  308.45   11.12
  -5  -1   4  310.51   11.00
  -2  -4 -10  368.32   13.69
  -2  -4 -10  401.34   13.65
   2   4  10  390.39   13.64
  -2  -4 -10  361.83   13.65
  -2  -4 -10  354.81   13.74
  -1   2 -10   68.36    3.97
   1  -2  10   96.46    3.93
  -1   2 -10   72.62    3.96
  -1   2 -10   96.71    4.16
   1  -2  10   76.59    4.00
   1  -2  10   84.52    3.86
  -4   3   0  400.66   14.03
  -4   3   0  381.94   13.63
   4  -3   0  378.15   14.02
   4  -3   0  403.74   14.03
  -4   3   0  405.01   14.10
   4  -3   0  396.41   13.88
   3  -4  -3  833.84   28.41
   3  -4  -3  799.12   28.58
  -3   4   3  838.49   28.45
  -3   4   3  816.92   28.62
  -3   4   3  804.71   28.28
  -3   4   3  777.18   28.44
  -2  -1  10   21.30    2.74
  -2  -1  10   28.67    2.10
   2   1 -10   28.11    2.18
   2   6  -2  410.45   15.17
   2   6  -2  419.17   14.96
   2   6  -2  379.61   15.17
  -2  -6   2  386.69   15.14
   2   6  -2  443.26   15.15
  -2  -6   2  447.45   15.29
  -2  -6   2  440.31   15.01
  -2  -6   2  434.91   15.20
   1   0 -11  975.86   34.21
  -3   3  -6 1115.55   40.58
   3  -3   6 1172.14   40.81
  -3   3  -6 1143.95   40.36
  -3   3  -6 1154.28   40.58
   3  -3   6 1175.48   40.59
   3  -3   6 1191.60   40.39
  -3  -5  -8 1000.64   33.21
  -3  -5  -8  918.17   32.94
  -3  -5  -8  919.08   33.47
  -3  -5  -8  992.27   33.30
  -1   1  11    8.80    2.11
  -1   1  11    7.24    2.36
   1  -1 -11    5.78    2.24
   1  -1 -11    9.95    2.11
   1  -4   7  150.17    5.96
  -1   4  -7  150.55    5.80
   1  -4   7  142.15    5.88
   1   3  11   20.10    2.54
  -1  -3 -11   19.61    2.64
   0   1 -11  148.09    6.29
   0  -1  11  151.94    6.30
   0  -1  11  168.03    6.22
   0  -1  11  169.26    6.39
   0   1 -11  163.13    6.28
   0   1 -11  162.58    6.46
  -4  -3  -9  476.33   15.85
   4   3   9  431.61   16.23
  -4  -3  -9  438.62   16.29
  -4  -3  -9  434.01   16.18
   4   3   9  434.02   16.48
   4   3   9  444.28   16.23
  -4  -3   6   16.85    2.43
   4   3  -6   16.39    2.44
  -4  -3   6   11.68    2.82
   4   3  -6   21.15    2.49
  -4  -3   6   17.18    1.93
   3  -2   8  343.08   12.88
  -3   2  -8  345.40   12.52
   3  -2   8  352.75   12.48
   3  -2   8  363.07   12.71
  -3   2  -8  347.88   12.68
   4  -3   1   32.11    2.36
   4  -3   1   26.19    2.61
   4  -3   1   35.53    2.51
  -4   3  -1   25.42    2.38
  -4   3  -1   27.91    2.51
   4  -3  -1    9.75    2.37
  -4   3   1   10.74    2.41
   4  -3  -1    8.34    2.31
   4  -3  -1   13.82    1.70
  -4   3   1    9.88    1.18
  -4   3   1   10.50    2.38
   5  -1   3 1224.07   42.13
  -5   1  -3 1211.44   41.99
  -5   1  -3 1179.41   42.12
   4  -2  -5  220.88    8.25
   4  -2  -5  247.88    8.69
   4  -2  -5  263.32    8.83
  -4   2   5  254.77    8.58
  -5  -2   4   46.06    2.67
  -5  -2   4   38.10    2.87
  -5  -2   4   47.06    1.99
   5   2  -4   43.61    2.76
  -5  -2   4   49.10    3.46
   5   2  -4   45.21    2.81
   2   0  11  285.94   10.46
  -2   0 -11  267.30   10.55
  -2   0 -11  296.49   10.38
   2   0  11  293.79   10.58
   2   0  11  296.46   10.52
  -2   0 -11  267.90   10.61
   2   0  11  272.07   10.42
  -4   0   7   24.13    1.09
  -4   0   7   24.47    2.39
   4   0  -7   24.59    2.38
   4   0  -7   23.78    1.17
   4   0  -7   23.87    1.65
  -4   0   7   19.38    1.12
  -4   0   7   23.59    2.42
  -2   5  -1   11.95    1.96
   2  -5   1   13.76    2.48
   2  -5   1   17.03    1.98
  -2   5  -1   13.42    2.52
   2  -5   1   11.45    2.68
   2  -5   1   13.89    2.40
   0  -6   1  183.55    7.08
   0   6  -1  194.90    7.15
   0  -6   1  188.72    7.24
   0  -6   1  175.89    7.25
   0  -6   1  184.42    7.29
   0   6  -1  183.98    7.32
   0  -6   1  195.76    7.13
   0   6  -1  185.55    7.18
   0   6   4 1298.76   43.69
   0   6   4 1299.41   43.91
   0  -6  -4 1246.90   43.83
   0   6   4 1245.32   43.81
   0  -6  -4 1246.22   43.89
   0  -6  -4 1152.04   43.90
   0  -6  -4 1256.52   43.78
  -3   0   9 1034.61   35.34
  -3   0   9 1004.97   35.54
  -3   0   9 1014.22   35.35
   3   0  -9  978.75   35.59
  -3  -6  -5  264.73    9.47
  -3  -6  -5  262.77    9.81
  -3  -6  -5  270.53    9.86
   3   6   5  273.70    9.50
   3   6   5  261.14    9.92
  -2  -6  -6  169.02    6.68
   2   6   6  179.18    6.73
   2   6   6  173.51    6.79
   2   6   6  166.38    6.81
  -2  -6  -6  166.78    6.27
   1  -3 -10  587.96   20.24
  -1   3  10  594.73   20.45
  -1   3  10  560.17   20.21
   1  -3 -10  559.53   20.12
   5   2   7  510.04   18.71
  -5  -2  -7  526.22   18.26
   5   2   7  529.84   18.27
   5   2   7  524.06   18.57
  -5  -2  -7  495.88   18.77
  -5  -2  -7  512.09   18.56
  -2   5   3 1193.44   42.61
  -2   5   3 1199.15   42.69
   2  -5  -3 1275.96   42.55
   2  -5  -3 1220.23   42.44
  -2   5   3 1200.90   42.55
  -2   5   3 1241.16   42.44
   2  -5  -3 1180.53   42.63
   2  -5  -3 1203.12   42.57
  -3  -6   1  147.64    5.36
  -3  -6   1  148.76    5.67
   3   6  -1  148.88    5.95
  -3  -6   1  154.74    6.33
   3   6  -1  152.25    6.06
  -3  -6   1  143.60    5.97
   3   6  -1  142.80    5.59
  -2   4   7   19.79    2.13
  -2   4   7   24.36    2.74
   2  -4  -7   13.16    2.50
   2  -4  -7   15.80    2.30
  -2   4   7   14.55    2.80
   2  -4  -7   19.21    1.98
   0   5   8  156.89    6.21
   0  -5  -8  152.83    6.09
   0   5   8  173.69    5.92
   0  -5  -8  149.34    6.32
   0  -5  -8  134.35    6.12
   5  -1  -2  388.29   12.41
   5  -1  -2  376.02   12.24
   5  -1  -2  373.64   12.08
  -5   1   2  377.50   12.05
   5  -1  -2  398.05   12.35
   5  -1  -2  330.86   11.92
   5  -1  -2  297.61   11.91
   3  -2  -8 1697.39   58.37
  -3   2   8 1684.59   58.08
  -3   2   8 1646.41   58.29
   3  -2  -8 1644.12   58.38
   2   3  11  891.97   32.02
   2   3  11  905.54   31.94
   2   3  11  925.08   32.00
   1  -1  11 1994.87   68.37
   1  -1  11 1969.99   68.37
  -1   1 -11 1916.80   68.43
  -1   1 -11 1883.18   68.41
  -1   1 -11 2029.31   68.38
   1  -1  11 1972.04   68.44
  -3  -1   9 1039.44   35.64
  -3  -1   9 1012.50   35.76
   3   1  -9  997.39   35.79
  -2   3  -8 2049.27   71.05
   2  -3   8 2091.61   71.25
  -2   3  -8 2041.35   71.12
   2  -3   8 1925.48   71.14
   2  -3   8 2100.25   71.05
   4  -3   2  506.58   16.72
   4  -3   2  477.74   16.68
   4  -3   2  428.79   16.32
  -4   3  -2  517.70   16.71
   4  -3   2  518.95   16.77
  -4   3  -2  493.82   16.76
   4  -3  -2  210.74    7.83
  -4   3   2  194.76    7.93
   4  -3  -2  201.84    7.43
   4  -3  -2  210.92    7.57
  -4   3   2  207.94    7.91
  -4   3   2  218.78    7.50
   1  -3   9 2246.67   77.55
  -1   3  -9 2171.65   77.58
  -1   3  -9 2230.23   77.65
   1  -3   9 2261.97   77.60
  -1   3  -9 2234.55   77.56
   1   6   6  213.46    7.89
   1   6   6  214.30    7.71
  -1  -6  -6  203.24    7.82
  -1  -6  -6  194.42    7.47
   1   6   6  199.10    7.92
  -1  -6  -6  196.52    7.84
  -4  -2   7  319.66   11.29
   4   2  -7  335.27   11.64
  -4  -2   7  326.42   11.79
  -4  -2   7  307.42   11.12
  -4  -2   7  325.56   11.29
  -4  -2   7  316.40   11.63
   3  -4   3    9.50    1.52
  -3   4  -3    8.27    2.41
   3  -4   3    3.36    2.29
   3  -4   3    4.77    2.42
  -3   4  -3    7.53    1.39
  -3   4  -3   10.15    2.41
  -4  -4   5  187.78    7.14
  -4  -4   5  180.24    7.46
   4   4  -5  202.41    7.27
   4   4  -5  185.95    6.99
  -4  -4   5  172.00    7.22
  -4  -4   5  183.04    6.95
   4   4  -5  178.74    7.25
  -5   0   4  191.60    7.23
  -5   0   4  200.24    7.41
   5   0  -4  202.25    7.62
   5   0  -4  203.70    7.45
   5   0  -4  206.07    7.42
  -1  -5   6   37.65    2.82
   1   5  -6   43.65    2.88
  -1  -5   6   40.61    2.99
  -1  -5   6   37.84    3.14
   1   5  -6   43.62    2.73
  -1  -5   6   42.84    2.30
   5   3   7  914.75   32.55
   5   3   7  956.86   32.54
  -5  -3  -7  914.37   32.20
  -5  -3  -7  899.17   32.14
  -5  -3  -7  897.15   32.50
  -5  -3  -7  964.61   32.63
   5   3   7  943.81   32.14
  -5  -3  -7  951.93   32.47
   5   4  -2  158.88    5.86
   5   4  -2  162.68    6.06
   5   4  -2  125.16    6.54
   5   4  -2  157.50    6.39
   5   4  -2  174.83    6.61
  -5  -4   2  164.09    6.09
  -5  -4   2  171.02    6.37
  -5  -4   2  153.16    6.52
  -1  -4   8  249.30    9.60
  -1  -4   8  246.10    9.57
   1   4  -8  264.67    9.61
  -1  -4   8  265.19    9.21
   1   4  -8  248.76    9.53
  -1  -4   8  257.58    9.67
   2  -4   6   85.96    4.22
   2  -4   6   83.70    3.62
  -2   4  -6   78.77    3.92
  -2   4  -6   78.55    3.59
   2  -5   2  293.19   11.49
   2  -5   2  314.75   11.64
   2  -5   2  314.02   11.38
   2  -5   2  316.38   11.61
  -2   5  -2  321.32   11.62
  -2   5  -2  332.66   11.36
  -3   4   4  376.16   13.41
   3  -4  -4  373.25   13.30
  -3   4   4  364.49   13.63
  -3   4   4  376.65   13.34
   3  -4  -4  375.85   13.57
   2   5   9  237.38    8.54
  -2  -5  -9  238.05    8.22
  -2  -5  -9  205.49    8.56
  -2  -5  -9  220.22    8.75
  -2  -5  -9  217.10    8.60
  -2  -5  -9  222.02    8.55
   5   0   6   -2.39    1.88
  -5   0  -6    0.37    1.48
  -5   0  -6    3.55    1.98
   5   0   6    5.96    2.26
   5   0   6    2.88    1.19
  -4   2  -6   51.65    2.88
   4  -2   6   47.01    2.97
   4  -2   6   40.75    3.56
   4  -2   6   47.34    2.11
  -4   2  -6   48.28    2.17
  -4   2  -6   47.94    2.94
   5   1   7  539.58   18.38
   5   1   7  503.28   18.59
  -5  -1  -7  539.82   18.39
   5   1   7  520.99   18.44
   5   1   7  461.30   18.74
   5   1   7  507.06   18.59
  -5  -1  -7  559.57   18.91
   5   4   6  363.36   12.89
  -5  -4  -6  368.93   12.86
  -5  -4  -6  348.71   12.49
  -5  -4  -6  342.94   12.90
  -5  -4  -6  349.74   12.97
   5   4   6  363.83   12.87
   4   5  -3  256.96    9.20
   4   5  -3  253.07    9.32
   4   5  -3  242.96    9.41
  -4  -5   3  264.67    9.37
   4   5  -3  267.38    9.62
   4   5  -3  220.17    9.44
  -4  -5   3  261.60    9.52
  -4  -5  -7  323.73   10.94
   4   5   7  277.93   11.12
  -4  -5  -7  301.49   11.19
  -4  -5  -7  298.19   11.10
  -5   1  -4    4.45    2.11
   5  -1   4    7.34    2.08
  -5   1  -4    4.55    1.60
  -1   4   9  174.47    6.71
  -1   4   9  205.88    7.47
  -1   4   9  204.65    7.16
   1  -4  -9  200.90    7.15
   0  -4   8  137.88    5.13
   0  -4   8  101.60    5.33
   0   4  -8  130.13    5.26
   0  -4   8  133.91    5.34
   0   3  11   51.41    3.04
   0   3  11   43.33    3.22
   0  -3 -11   47.77    3.20
   0  -3 -11   50.17    2.80
  -1  -1  11  398.34   13.51
   1   1 -11  389.03   13.47
   1   1 -11  332.52   13.58
   0   4  10  378.45   13.62
   0   4  10  366.02   13.90
   0  -4 -10  395.47   13.64
   0  -4 -10  380.12   13.68
   0  -4 -10  361.54   13.80
  -1  -5  -9   39.58    2.97
   1   5   9   38.27    3.01
  -1  -5  -9   46.38    3.13
  -1  -5  -9   41.67    2.50
   3   3  -8  726.17   25.03
  -3  -3   8  675.59   25.39
  -3  -3   8  719.58   25.39
  -3  -3   8  751.64   25.32
   3   3  -8  697.58   25.36
   0   6  -2  237.29    9.02
   0   6  -2  232.37    8.70
   0   6  -2  234.41    8.70
   0  -6   2  228.37    8.71
   0  -6   2  226.50    8.84
   0  -6   2  234.83    8.67
  -3   1   9  589.19   20.59
   3  -1  -9  558.96   20.66
  -3   1   9  580.05   20.31
   3  -1  -9  584.73   20.35
   0  -6  -5   43.56    2.84
   0  -6  -5   41.35    3.02
   0   6   5   47.52    2.92
   0   6   5   54.61    3.15
   0  -6  -5   46.99    3.33
   0   6   5   51.32    2.47
   2  -5  -4   82.84    3.83
   2  -5  -4   76.65    4.15
  -2   5   4   92.14    3.84
   2  -5  -4   83.79    3.56
   2  -5  -4   83.75    3.90
  -2   5   4   80.30    4.21
  -2   5   4   81.24    4.02
   1   6  -3   63.21    3.37
  -1  -6   3   66.25    3.37
  -1  -6   3   71.77    3.80
  -1  -6   3   67.91    3.49
   1   6  -3   69.25    3.74
   1   6  -3   67.58    3.67
  -1  -6   3   63.79    3.87
  -2   3   9  116.20    4.69
   2  -3  -9  121.70    4.69
   2  -3  -9  118.83    5.26
  -2   3   9  108.46    5.12
  -1   2  11  342.38   11.78
   1  -2 -11  284.08   12.10
   1  -2 -11  331.07   11.79
  -1   2  11  328.13   11.98
  -2  -3   9  138.62    5.82
   2   3  -9  144.41    5.72
   2   3  -9  137.66    5.25
  -1   5   7  660.06   22.30
   1  -5  -7  626.76   22.27
   1  -5  -7  603.94   22.30
  -3  -5   5   10.44    2.48
  -3  -5   5    5.46    2.77
  -3  -5   5   14.99    2.36
   3   5  -5    8.75    2.22
   3  -3  -7   12.66    1.50
  -3   3   7   15.29    2.31
   3  -3  -7    6.05    2.54
  -3   3   7   10.78    1.62
  -3   3   7   11.01    1.34
   3  -3  -7   10.65    2.58
   4  -3   3  192.24    7.18
  -4   3  -3  182.66    7.18
   4  -3   3  192.77    7.25
  -4   3  -3  179.85    7.23
   2   6  -3  468.65   16.64
   2   6  -3  456.60   16.51
  -2  -6   3  449.25   16.34
   2   6  -3  472.86   16.50
  -2  -6   3  474.66   16.51
   2   6  -3  468.04   16.30
  -2  -6   3  473.32   16.63
  -2  -6   3  411.46   16.47
  -3  -6  -6 3065.57  106.05
  -3  -6  -6 3084.10  106.03
  -3  -6  -6 3083.88  105.80
   3   6   6 2903.00  106.08
  -4   3   3  118.67    5.17
   4  -3  -3  125.42    4.64
   4  -3  -3  125.52    5.07
  -4   3   3  117.37    4.65
   2  -2 -10  416.46   15.90
  -2   2  10  503.88   16.12
   2  -2 -10  497.70   16.51
  -2   2  10  496.94   16.39
  -3  -2 -11 1037.83   36.36
   3   2  11 1037.96   36.72
   3   2  11 1050.50   36.59
  -4   0  -9 1123.69   38.76
   4   0   9 1083.59   38.94
   4   0   9 1130.72   38.73
   4   0   9 1049.10   39.03
   4   0   9 1124.07   38.78
  -3  -4 -10  156.16    5.86
  -3  -4 -10  147.88    6.35
  -3  -4 -10  158.56    6.70
  -3  -4 -10  170.35    6.28
   5  -1  -3   58.82    2.79
  -5   1   3   53.63    2.43
  -5   1   3   44.49    1.97
   5  -1  -3   57.06    2.98
   5  -1  -3   51.44    2.48
   5  -1  -3   51.28    2.75
   5   5   2  797.87   27.74
   5   5   2  811.46   27.79
   5   5   2  786.21   28.03
  -5  -5  -2  801.34   27.87
   5   5   2  777.50   27.59
  -5  -5  -2  805.98   27.98
  -5  -5  -2  818.64   28.26
   5   5   2  795.43   27.99
   5   5   2  801.82   28.03
  -5  -3   4  168.93    6.58
  -5  -3   4  163.13    6.52
   5   3  -4  154.87    6.67
  -5  -3   4  176.02    6.96
   5   3  -4  169.04    6.22
   5   3  -4  165.21    6.53
  -5  -3   4  168.03    6.54
  -5  -3   4  167.59    6.19
   0  -5   6    9.83    2.43
   0  -5   6   13.94    2.53
   0   5  -6   11.47    2.28
   0  -5   6   13.94    2.23
   0   5  -6   10.87    2.26
  -1   5  -5   35.95    2.60
   1  -5   5   38.51    2.70
  -1   5  -5   32.94    2.87
  -2  -5   6  657.98   22.46
  -2  -5   6  598.55   21.96
  -2  -5   6  615.24   22.44
   2   5  -6  654.81   22.43
  -2  -5   6  667.67   22.37
   2   5  -6  689.26   22.33
  -2  -5   6  652.84   22.51
  -3  -6   2   37.86    2.95
  -3  -6   2   35.13    3.11
  -3  -6   2   39.85    2.44
   3   6  -2   34.99    2.31
   3   6  -2   38.84    2.78
  -3  -6   2   30.62    1.52
   3   6  -2   37.56    2.89
   4  -1   8    8.66    2.90
   4  -1   8    7.34    1.57
   4  -1   8    7.62    2.17
  -4   1  -8    3.88    2.06
   1   1  12 1038.23   36.99
  -1  -1 -12 1041.11   37.00
  -1  -1 -12 1035.83   37.07
   1   1  12 1070.58   36.97
  -1  -1 -12 1069.57   36.93
  -1  -1 -12 1063.48   36.99
   1   1  12 1050.80   36.99
  -4   1   7   86.66    3.58
  -4   1   7   67.81    2.71
   4  -1  -7   88.71    3.77
   4  -1  -7   80.45    2.89
  -4   1   7   91.12    3.67
   4  -1  -7   87.36    3.72
   5   5   3    1.32    2.31
   5   5   3    3.06    1.46
   5   5   3    3.79    2.43
  -5  -5  -3    3.73    2.71
  -5  -5  -3    0.05    2.10
   5   5   3    1.62    1.78
  -5  -5  -3    0.78    2.22
   4   6   2  251.15    9.70
   4   6   2  254.88    9.23
  -4  -6  -2  242.84    9.19
  -4  -6  -2  244.84    9.39
  -4  -6  -2  249.41    8.90
   4   6   2  255.24    8.88
   4   6   2  253.11    9.65
  -4  -6  -2  242.03    9.04
   4   6   2  258.68    9.44
  -3  -1 -11   42.18    2.62
  -3  -1 -11   43.08    3.57
   3   1  11   42.35    3.35
   3   1  11   39.61    2.97
   3   1  11   36.81    2.65
   4   6   3   80.45    4.36
   4   6   3   88.28    3.93
  -4  -6  -3   95.60    3.92
  -4  -6  -3   84.90    3.27
   4   6   3   80.04    4.33
  -4  -6  -3   87.72    4.06
   4   6   3   87.29    3.26
  -4  -6  -3   82.16    3.75
   4   6   3   89.89    4.21
  -5  -5  -1  521.51   18.92
  -5  -5  -1  560.45   19.09
   5   5   1  540.63   19.09
   5   5   1  526.19   18.74
   5   5   1  533.45   19.15
   5   5   1  546.18   18.87
   5   5   1  540.58   18.84
   5   5   1  518.41   19.14
  -5  -5  -1  560.26   19.35
  -5  -1   5  706.31   26.20
   5   1  -5  777.48   26.18
  -5  -1   5  723.23   26.39
   5   1  -5  739.70   26.09
   5   1  -5  766.73   26.17
   2   2 -10  683.18   24.23
  -2  -2  10  701.97   24.32
   3   4  -7   12.21    2.42
  -3  -4   7    9.21    2.71
  -3  -4   7   10.35    2.35
   2   6   7 1848.66   64.84
   2   6   7 1807.32   64.85
  -2  -6  -7 1856.17   64.58
  -2  -6  -7 1922.64   64.83
  -3  -2   9  263.13    9.85
   3   2  -9  245.47    9.95
  -3  -2   9  270.56    9.57
   3   2  -9  282.15    9.55
  -3  -2   9  245.04    9.87
  -4  -6  -1 1324.75   44.36
  -4  -6  -1 1267.94   44.07
  -4  -6  -1 1238.08   44.09
   4   6   1 1290.25   44.24
   4   6   1 1246.59   44.04
   4   6   1 1259.76   44.34
   4   6   1 1310.84   44.51
   4   4   9  814.43   29.10
  -4  -4  -9  826.63   28.95
  -4  -4  -9  847.47   28.77
  -4  -4  -9  829.25   28.93
  -4  -4  -9  806.33   28.95
   4   4   9  873.76   28.91
  -4  -4  -9  796.74   28.51
   0  -1 -12   28.34    2.82
   0   1  12   27.29    2.19
   0   1  12   25.64    2.55
   0  -1 -12   20.96    2.87
   0  -1 -12   26.33    2.52
   1   2  12  479.91   17.55
   1   2  12  505.94   17.53
  -1  -2 -12  472.97   17.52
  -1  -2 -12  505.41   17.61
  -4   2   6    8.01    1.97
   4  -2  -6    4.06    2.16
  -4   2   6    5.89    0.80
   4  -2  -6    4.56    2.45
   4  -2  -6    5.95    0.81
  -2   5  -3 1363.51   45.20
  -2   5  -3 1370.04   45.43
   2  -5   3 1300.77   45.39
   2  -5   3 1324.94   45.44
   2  -5   3 1320.12   45.22
   5   5   4   78.49    3.79
  -5  -5  -4   77.44    3.21
  -5  -5  -4   74.29    3.66
   5   5   4   75.83    3.56
  -5  -5  -4   70.50    4.23
   5   5   4   77.77    3.21
  -5  -5  -4   75.26    3.77
  -3   4  -4   35.04    1.95
  -3   4  -4   36.83    2.75
  -3   4  -4   33.96    2.83
   3  -4   4   30.78    2.76
  -5  -2   5   63.53    3.41
  -5  -2   5   61.41    3.49
  -5  -2   5   68.39    2.71
  -5  -2   5   69.68    3.82
   5   2  -5   65.38    3.47
   5   2  -5   71.36    3.37
  -4  -2 -10  116.46    4.32
   4   2  10  108.91    4.85
   4   2  10  109.43    4.91
  -4  -2 -10  106.12    4.93
   4   2  10  104.67    4.34
   4   2  10  102.57    5.24
   2   4  -8    1.99    2.27
  -2  -4   8    5.09    2.62
  -2  -4   8    6.25    2.57
   2   4  -8    3.64    2.12
  -4  -6  -4 1595.72   52.94
  -4  -6  -4 1511.73   52.67
   4   6   4 1597.48   53.26
  -4  -6  -4 1552.78   52.93
   4   6   4 1626.17   53.12
  -4  -6  -4 1575.29   53.11
   4   6   4 1426.86   52.67
   4   6   4 1630.57   52.96
  -1   6   1  529.49   21.35
   1  -6  -1  616.17   21.33
  -1   6   1  619.89   21.20
  -1   6   1  606.56   21.30
   1  -6  -1  597.50   21.09
  -1   6   1  602.11   21.40
   1  -6  -1  607.82   21.30
   1  -6  -1  613.30   21.25
  -3   3  -7 1730.12   58.70
   3  -3   7 1696.34   58.51
   3  -3   7 1713.24   58.69
   3  -3   7 1644.05   58.87
  -3   3  -7 1688.27   58.71
  -3   3  -7 1638.17   58.50
   2  -2  10   90.27    4.09
   2  -2  10   90.57    4.41
  -2   2 -10   95.04    4.66
   2  -2  10   95.36    4.26
  -2   2 -10   89.91    4.17
  -2   2 -10   92.02    4.20
  -3  -5  -9  737.52   27.29
  -3  -5  -9  781.26   26.79
  -3  -5  -9  772.78   27.06
  -3  -5  -9  750.53   27.13
   1  -6  -2 1102.56   38.52
   1  -6  -2 1091.95   38.51
   1  -6  -2 1156.96   38.59
  -1   6   2 1070.67   38.59
  -1   6   2 1089.24   38.55
  -1   6   2 1094.04   38.48
   1   6   7  223.04    8.99
  -1  -6  -7  234.97    8.81
   1   6   7  248.48    8.75
  -1  -6  -7  231.42    8.57
  -1  -6  -7  230.31    8.89
   1   6   7  230.28    8.85
  -5   1  -5  150.24    5.91
  -5   1  -5  149.33    5.70
   5  -1   5  152.80    5.94
   3  -4  -5    4.87    2.44
   3  -4  -5    1.11    2.21
   3  -4  -5    2.44    1.09
  -3   4   5    2.80    1.74
  -3   4   5    0.89    2.69
  -3   4   5    5.05    2.24
   3  -4  -5    1.30    1.67
   5   4  -3   15.91    2.77
   5   4  -3   12.34    3.04
  -5  -4   3   15.59    3.23
  -5  -4   3   16.85    2.07
   5   4  -3   18.86    2.07
  -5  -4   3   18.98    2.49
   5   4  -3   18.26    2.54
   5   4  -3   18.44    1.46
  -5  -4   3   19.06    2.55
  -5  -4   3   16.10    2.53
   5   5   0  108.01    5.10
  -5  -5   0  117.25    4.99
   5   5   0  120.35    5.48
   5   5   0  115.52    5.09
  -5  -5   0  121.50    5.38
   5   5   0  118.61    4.96
   5   5   0  114.19    4.48
   5   5   0  129.79    4.52
   5   5   0  113.77    4.65
  -5  -5   0  119.65    4.67
  -3   1 -10  701.09   25.59
  -3   1 -10  721.12   25.30
  -3   1 -10  745.42   25.33
   3  -1  10  699.49   25.32
   3  -1  10  724.59   25.25
   3  -1  10  705.60   25.51
  -5  -2  -8    8.19    2.74
   5   2   8    6.48    2.85
   5   2   8    2.47    2.64
  -5  -2  -8    6.89    1.57
   5   2   8    8.36    1.51
  -5  -2  -8   10.51    2.58
  -2   1 -11   -0.10    2.16
  -2   1 -11    3.11    2.46
   2  -1  11    0.68    2.73
   2  -1  11    2.10    2.24
  -2   1 -11    2.52    2.70
   2  -1  11    3.62    2.38
   2  -1  11   -1.15    2.58
  -3  -3 -11  103.09    4.11
   3   3  11  101.58    4.79
   3   3  11   93.32    4.86
  -1   0 -12  322.77   11.92
   1   0  12  320.18   11.80
   1   0  12  330.86   11.89
  -1   0 -12  327.80   11.78
  -1   0 -12  316.48   11.86
   1   0  12  316.77   11.77
   0   0  12   36.37    2.89
   0   0  12   31.98    3.14
   0   0 -12   52.11    3.49
   0   0 -12   44.37    2.96
   0   0 -12   42.82    3.00
   2  -5  -5    1.78    1.45
  -2   5   5    0.38    2.41
   2  -5  -5    1.23    2.18
   2  -5  -5   -3.45    2.55
  -2   5   5   -0.95    2.76
  -2   5   5    3.52    2.10
   2  -5  -5    0.23    2.05
  -1   6   0   27.01    3.12
   1  -6   0   30.95    2.17
   1  -6   0   28.62    2.67
   1  -6   0   28.79    2.54
   1  -6   0   32.73    2.72
  -1   6   0   25.09    2.92
  -1   6   0   25.21    2.70
  -4  -6   0  504.93   17.64
   4   6   0  495.40   17.66
  -4  -6   0  506.42   17.71
  -4  -6   0  510.75   18.02
   4   6   0  501.87   17.99
   4   6   0  501.88   18.17
   4   6   0  502.51   17.90
   6   2   2   12.34    1.74
   6   2   2   12.45    1.80
   6   2   2   12.29    1.87
   6   2   2    7.29    2.50
   6   2   2   12.40    1.80
   6   2   2   15.03    3.12
   0  -6   3    3.08    2.35
   0   6  -3    1.58    2.11
   0  -6   3    1.11    2.23
   0   6  -3   -0.56    2.40
   0  -6   3   -1.62    2.84
   5   4   7   82.65    4.45
   5   4   7   98.45    4.27
  -5  -4  -7   89.49    4.50
  -5  -4  -7   95.17    4.40
  -5  -4  -7  100.80    4.36
  -5  -4  -7   94.94    3.72
   0   6   6   13.47    2.49
   0  -6  -6   11.60    2.18
   0  -6  -6   11.09    2.60
   0   6   6   10.90    1.82
   0   6   6   13.27    2.08
   0  -6  -6   13.71    2.36
   6   2   1   94.67    3.88
   6   2   1  102.49    4.05
   6   2   1  104.98    4.72
   6   2   1   97.05    3.99
   6   2   1   96.32    4.51
   6   2   1   89.90    3.95
  -4   3  -4  228.88    7.80
  -4   3  -4  219.28    7.84
   4  -3   4  241.25    7.87
  -4   3  -4  192.92    7.19
  -4   3   4  429.21   15.48
  -4   3   4  420.39   15.17
   4  -3  -4  437.57   15.08
   4  -3  -4  422.19   15.42
  -5   0   5   -1.45    2.11
   5   0  -5    3.18    2.08
   5   0  -5    3.01    1.98
   5   0  -5    2.90    1.81
  -4  -1 -10   18.52    2.05
   4   1  10   16.45    2.12
   4   1  10   14.56    2.78
   4   1  10   16.43    2.76
   4   1  10   17.14    2.36
  -1   6   3  319.42   11.44
  -1   6   3  313.43   11.51
  -1   6   3  311.26   11.59
   1  -6  -3  328.16   11.47
   1  -6  -3  315.46   11.58
   1  -6  -3  301.32   11.45
  -4  -1   8 1092.01   38.47
   4   1  -8 1079.34   38.74
  -4  -1   8 1139.63   38.76
  -4  -1   8 1131.97   38.83
   2   1  12  425.04   14.77
   2   1  12  401.91   14.81
   2   1  12  402.04   14.76
   2   1  12  412.93   14.79
  -2  -1 -12  395.78   14.90
  -2  -1 -12  415.93   14.83
  -2  -1 -12  402.19   14.64
   2  -4  -8   -0.04    1.87
   2  -4  -8   -0.84    2.77
   2  -4  -8    1.23    2.22
  -2   4   8    1.54    2.52
  -2   4   8    1.92    1.93
   2   2  12   56.77    3.57
   2   2  12   53.96    3.30
  -2  -2 -12   55.22    3.41
  -2  -2 -12   50.24    3.00
   2   2  12   52.22    3.37
   2   2  12   55.59    3.46
  -2  -2 -12   48.29    3.36
   0  -2  11    4.28    2.12
   0  -2  11    0.82    2.44
   0   2 -11    1.32    2.54
   0   2 -11    3.50    2.45
   0   2 -11    6.29    2.39
   4   3  10   46.37    3.68
  -4  -3 -10   47.52    2.27
  -4  -3 -10   48.02    3.44
  -4  -3 -10   40.41    3.23
  -4  -3   7   29.65    3.01
  -4  -3   7   27.35    2.60
  -4  -3   7   30.57    3.08
  -4  -3   7   32.92    2.21
   4   3  -7   32.05    2.84
   0   2  12    9.41    2.39
   0  -2 -12    4.95    2.39
   0  -2 -12   12.23    2.58
   5   3   8    6.14    2.35
  -5  -3  -8    3.21    2.22
   5   3   8    7.48    1.25
  -5  -3  -8    4.92    1.16
  -5  -3  -8    4.12    1.47
   5   3   8    8.02    2.46
  -5  -3  -8    7.29    2.77
   6   2   3   80.08    3.49
   6   2   3   77.34    4.15
   6   2   3   76.52    3.41
   6   2   3   88.40    4.52
   6   2   3   87.67    3.63
   6   2   3   79.26    3.59
   1  -4   8  232.40    8.81
   1  -4   8  233.32    8.88
  -1   4  -8  242.09    8.81
   0  -3  10  831.03   29.14
   0   3 -10  840.30   29.24
   0   3 -10  822.91   29.27
   0  -3  10  828.26   29.27
   5   0   7  454.15   15.69
   5   0   7  432.65   15.51
  -5   0  -7  441.94   15.59
   5   0   7  389.95   15.86
  -5   0  -7  478.62   15.71
   0  -5  -9  278.80   10.84
   0   5   9  313.20   10.60
   0   5   9  297.90   10.86
   0  -5  -9  280.05   11.05
   0  -5  -9  289.03   10.75
   4   5  -4   51.23    2.81
  -4  -5   4   55.63    3.21
  -4  -5   4   48.40    3.35
   4   5  -4   51.48    3.52
  -4  -5   4   41.30    2.93
   4   5  -4   35.41    3.08
  -5  -5  -5    2.44    2.44
   5   5   5    4.07    2.14
   5   5   5    5.47    2.43
  -5  -5  -5    6.18    2.33
   5   5   5    2.88    1.54
  -5  -5  -5    2.06    1.53
  -5  -5  -5    5.20    3.15
  -4  -5  -8   23.04    2.65
  -4  -5  -8   23.61    3.40
  -4  -5  -8   18.44    0.88
  -4  -5  -8   25.27    2.52
  -4  -5  -8   27.15    2.25
  -1  -4 -11  705.93   25.05
   1   4  11  695.49   24.98
  -1  -4 -11  709.69   25.04
  -1  -4 -11  718.16   25.10
   3  -2   9 1057.07   37.02
   3  -2   9 1053.07   37.34
  -3   2  -9 1041.73   37.13
   3  -2   9 1072.86   37.18
  -3   2  -9 1075.20   37.08
   5  -1  -4   28.90    2.12
  -5   1   4   24.89    2.03
   5  -1  -4   19.69    2.30
   5  -1  -4   22.08    2.63
  -2   0  11  556.18   19.87
   4   0  -8   59.81    3.28
  -4   0   8   64.35    3.37
  -4   0   8   55.16    2.32
  -4   0   8   58.15    3.22
  -3  -6  -7  224.55    8.75
  -3  -6  -7  239.88    8.27
   3   6   7  218.60    8.74
  -3  -6  -7  209.52    9.09
  -3  -6  -7  241.07    8.76
  -5   2   0  181.02    7.03
  -5   2   0  176.44    7.23
   5  -2   0  185.42    6.84
   5  -2   0  193.27    7.21
   5  -2   0  187.81    7.01
   5  -2   1  787.55   26.98
  -5   2  -1  740.96   26.87
   5  -2   1  789.30   26.88
  -5   2  -1  744.27   26.99
  -2  -4 -11   56.73    3.53
   2   4  11   63.51    3.44
  -2  -4 -11   50.06    3.66
  -2  -4 -11   58.16    3.57
   4   6   5  751.57   24.76
  -4  -6  -5  743.96   24.92
  -4  -6  -5  672.09   24.38
  -4  -6  -5  696.90   24.75
  -4  -6  -5  762.35   24.73
   4   6   5  747.27   24.92
   6   2   0   24.43    2.09
   6   2   0   28.53    2.80
   6   2   0   29.65    2.14
   6   2   0   29.45    2.93
  -6  -2   0   28.27    1.72
   6   2   0   27.83    1.71
   6   2   0   19.34    1.20
   6   2   0   28.13    3.08
  -1  -6   4    3.15    2.29
   1   6  -4    4.04    2.19
   1   6  -4    1.63    2.51
   1   6  -4    0.31    2.47
  -1  -6   4   -1.56    2.48
  -1  -6   4   -1.94    2.66
   6   3   2  264.34    9.71
   6   3   2  268.99    9.47
   6   3   2  253.52    9.63
   6   3   2  261.89    9.86
  -6  -3  -2  271.00    9.64
   6   3   2  251.81   10.13
  -6  -3  -2  273.07    9.56
   6   3   2  261.27    9.73
  -1   6  -1  156.18    6.11
  -1   6  -1  152.39    6.23
   1  -6   1  160.26    6.36
  -1   6  -1  151.78    6.44
   1  -6   1  150.11    6.14
  -1   6  -1  152.67    6.38
   1  -6   1  156.84    6.17
   4  -2   7  293.74   11.12
   4  -2   7  303.56   10.48
  -4   2  -7  267.02   10.79
  -4   2  -7  298.33   10.85
  -4   2  -7  301.58   10.52
   4  -2   7  291.79   10.83
  -1  -3  10  605.78   21.28
   1   3 -10  602.65   21.35
   1   3 -10  614.97   21.55
  -1  -3  10  599.09   21.54
   6   1   1 1058.10   34.30
   6   1   1 1015.79   33.83
   6   1   1 1032.11   33.95
   6   1   1 1090.50   33.83
   6   1   1 1014.64   33.84
   6   1   1 1029.38   33.82
  -3  -6   3   69.25    3.02
   3   6  -3   68.07    2.87
   3   6  -3   61.39    3.34
  -3  -6   3   55.76    3.66
   3   6  -3   70.39    3.54
  -3  -6   3   63.08    3.33
   5   1   8  156.71    5.92
  -5  -1  -8  143.92    6.73
   5   1   8  150.66    6.35
   5   1   8  158.31    6.03
  -5  -1  -8  163.37    5.96
   5   1   8  153.30    6.29
   6   1   2   20.15    1.91
   6   1   2   19.47    1.92
   6   1   2   21.09    2.14
   6   1   2   23.09    3.08
   6   1   2   26.13    1.72
   6   1   2   25.32    1.74
   3   0  11  369.14   13.64
  -3   0 -11  378.33   13.98
  -3   0 -11  396.62   13.80
   3   0  11  377.58   13.79
   3   0  11  374.51   13.65
  -3   0 -11  381.49   13.62
  -6  -3  -1  189.75    7.05
   6   3   1  203.99    7.29
   6   3   1  188.33    7.42
   6   3   1  194.73    7.15
  -6  -3  -1  188.59    7.18
   6   3   1  206.12    7.35
   6   3   1  180.01    7.72
   6   3   1  188.86    7.06
   6   3   1  192.47    7.91
   4   4  -6  826.99   29.06
  -4  -4   6  835.31   28.89
  -4  -4   6  835.44   29.06
  -4  -4   6  835.23   29.12
  -4  -4   6  820.21   29.24
   4   4  -6  774.06   28.93
  -4  -4   6  841.72   29.03
  -2  -6   4   29.78    2.70
  -2  -6   4   30.36    3.17
  -2  -6   4   33.12    2.61
   2   6  -4   29.92    3.15
  -2  -6   4   28.87    3.05
   2   6  -4   32.70    3.05
   2   6  -4   30.44    2.56
   2   6  -4   31.39    2.66
  -5   2   1  138.96    5.33
   5  -2  -1  161.30    6.03
   5  -2  -1  161.85    5.56
   5  -2  -1  156.13    5.84
  -5   2   1  162.56    5.93
  -5   2   1  146.48    6.03
  -5  -5   1  119.05    5.02
   5   5  -1  122.96    5.05
   5   5  -1  123.29    5.15
  -5  -5   1  120.41    5.49
   5   5  -1  116.82    4.46
   5   5  -1  118.05    5.52
   5   5  -1  121.41    5.24
   5   5  -1  121.89    4.78
   5   5  -1  120.75    4.62
   6   3   3  459.84   16.83
   6   3   3  465.95   17.23
  -6  -3  -3  473.88   16.84
   6   3   3  479.11   16.99
   6   3   3  465.94   16.84
   6   3   3  473.42   16.83
  -6  -3  -3  484.25   16.79
   6   3   3  477.70   16.61
   5  -2   2   73.75    3.41
  -5   2  -2   74.87    3.75
   5  -2   2   73.73    3.72
  -5   2  -2   71.57    3.47
  -2   4  -7  298.19   12.21
   2  -4   7  345.80   12.07
  -2   4  -7  336.36   12.28
  -2   4  -7  345.16   12.05
   2  -4   7  341.73   12.39
   2  -1 -11  227.42    8.24
  -2   1  11  229.73    8.25
  -2   1  11  214.82    8.43
   2  -1 -11  214.18    8.66
   3  -2  -9  201.28    8.05
  -3   2   9  212.57    7.88
  -3   2   9  210.66    7.47
   3  -2  -9  189.95    8.08
   6   1   0  866.06   30.17
   6   1   0  909.00   30.38
   6   1   0  894.42   30.62
   6   1   0  806.14   30.12
   6   1   0  938.74   30.24
   1  -6  -4  420.76   15.09
  -1   6   4  419.15   15.10
   1  -6  -4  429.62   15.14
   1  -6  -4  403.33   15.18
  -1   6   4  427.30   15.20
  -1   6   4  430.00   15.20
  -4  -6   1   53.32    3.30
   4   6  -1   56.64    3.23
  -4  -6   1   47.05    3.19
   4   6  -1   52.55    2.57
   4   6  -1   56.43    3.51
  -4  -6   1   43.14    2.05
   4   6  -1   45.60    3.08
  -4  -6   1   45.32    3.84
  -1  -2  11   73.22    3.54
   1   2 -11   68.87    3.32
  -1  -2  11   63.74    3.79
   1   2 -11   65.99    3.83
   6   2   4  263.02    9.69
   6   2   4  247.76   10.24
   6   2   4  275.49    9.51
   6   2   4  252.01   10.01
   2  -3   9  171.53    6.76
   2  -3   9  172.10    6.94
   2  -3   9  169.41    7.10
  -2   3  -9  181.98    6.88
  -2   3  -9  187.81    6.82
  -1  -5   7  105.90    4.44
  -1  -5   7  111.13    4.86
  -1  -5   7  115.73    5.11
   1   5  -7  116.66    4.96
   1   5  -7  116.36    4.90
  -1  -5   7  114.74    5.02
   6   1   3  496.30   17.16
   6   1   3  474.99   17.29
   6   1   3  486.41   17.32
   6   1   3  474.45   17.68
   6   1   3  501.74   17.31
  -6  -1  -3  488.26   17.34
  -1   5   8  818.00   28.99
   1  -5  -8  840.37   28.99
   1  -5  -8  820.51   28.97
  -1   5   8  813.19   29.17
  -1   2 -11   40.27    3.08
   1  -2  11   37.28    2.88
  -1   2 -11   45.33    3.11
   1  -2  11   39.99    2.79
  -1   2 -11   37.79    2.89
   1  -2  11   41.73    2.99
  -2   5  -4  166.77    6.24
   2  -5   4  159.90    6.32
   2  -5   4  164.58    6.58
  -2   5  -4  164.06    6.62
   1   3  12  631.74   21.55
  -1  -3 -12  567.60   21.58
  -1  -3 -12  615.19   21.54
  -3   0  10   48.99    3.11
  -3   0  10   44.18    2.48
   3   0 -10   48.31    3.28
  -3   0  10   50.69    2.52
  -2  -5 -10 1049.09   37.33
   2   5  10 1084.92   37.23
  -2  -5 -10 1018.15   37.23
  -2  -5 -10 1073.55   37.25
  -2  -5 -10 1071.57   37.25
   5   3  -5 1395.24   50.15
  -5  -3   5 1467.52   49.93
  -5  -3   5 1467.97   50.11
   5   3  -5 1461.64   50.19
  -5  -3   5 1383.82   50.34
  -5  -3   5 1411.96   50.15
  -5  -3   5 1414.93   50.08
   4   2  -8  375.92   13.28
  -4  -2   8  364.38   12.78
  -4  -2   8  369.88   12.95
  -4  -2   8  357.31   12.85
  -4  -2   8  368.13   13.44
  -4  -2   8  351.44   13.25
   6   2  -1   70.53    3.74
   6   2  -1   69.14    2.85
   6   2  -1   71.88    3.82
   6   2  -1   73.66    3.31
   6   2  -1   62.08    2.77
  -6  -2   1   71.80    2.88
   6   2  -1   74.75    3.33
   6   2  -1   66.79    4.00
  -1   3  11    9.87    2.80
  -1   3  11   10.11    2.19
   1  -3 -11    9.92    1.74
   6   3   0    9.99    2.34
   6   3   0   11.11    1.82
  -6  -3   0    5.60    1.81
   6   3   0    8.95    2.23
   6   3   0    9.73    1.78
   6   3   0   12.00    2.12
   6   3   0   10.39    3.25
   6   3   0   11.68    2.74
  -6  -3   0    7.99    1.46
   2   1 -11  796.44   27.06
  -2  -1  11  745.13   27.06
  -3   4  -5   11.80    1.61
  -3   4  -5   12.78    2.51
  -3   4  -5   10.26    2.60
   2   6   8 2469.13   84.60
   2   6   8 2339.78   84.60
  -2  -6  -8 2460.40   84.35
  -2  -6  -8 2322.66   84.59
  -2  -6  -8 2527.78   84.62
  -1   5  -6    9.25    2.29
   1  -5   6    2.38    2.55
   1  -5   6    9.31    2.71
  -1   5  -6    7.20    2.53
   1  -5   6    6.93    2.25
  -3  -5   6   35.87    2.92
  -3  -5   6   37.10    3.24
   3   5  -6   33.93    2.64
  -3  -5   6   40.21    3.10
   6   3   4   12.87    2.54
   6   3   4    8.90    2.88
   6   3   4   11.92    2.23
  -6  -3  -4   11.51    2.06
   6   3   4   14.81    1.37
  -6  -3  -4   11.18    2.30
   2   0  12  595.61   21.59
  -2   0 -12  627.65   21.46
  -2   0 -12  594.08   21.61
   2   0  12  590.96   21.49
  -2   0 -12  578.15   21.62
   2   0  12  639.27   21.57
   3  -3  -8    1.12    2.69
  -3   3   8    1.77    1.54
  -3   3   8    0.56    2.37
   3  -3  -8    2.85    1.59
   3  -3  -8   -2.16    2.68
   1  -1 -12  259.46    9.33
  -1   1  12  241.50    9.31
   1  -1 -12  251.81    9.40
  -1  -5 -10   51.76    3.52
  -1  -5 -10   51.65    3.28
  -1  -5 -10   51.27    3.47
   1   5  10   51.38    3.17
  -1  -5 -10   53.01    3.00
   5  -2  -2  980.69   34.79
   5  -2  -2 1020.29   34.94
  -5   2   2 1001.92   34.78
   5  -2  -2 1013.95   35.10
   5  -2  -2 1021.14   35.01
  -5   2   2  983.24   35.03
   1   0 -12  210.81    7.99
  -3  -1  10  591.60   21.00
   3   1 -10  584.69   21.05
  -3  -1  10  593.43   20.85
  -5   1  -6   94.53    3.81
  -5   1  -6   88.79    4.07
   5  -1   6   86.42    3.27
   5  -1   6   97.21    4.00
  -2  -3 -12  361.00   14.07
  -2  -3 -12  385.63   13.92
   2   3  12  404.29   14.17
   2   3  12  389.16   14.27
   2   3  12  407.92   14.19
   5   5   6   40.86    2.73
   5   5   6   32.66    2.77
  -5  -5  -6   34.67    2.99
   5   5   6   39.17    2.19
  -5  -5  -6   33.53    2.13
  -5  -5  -6   37.82    3.19
   5  -2   3   -0.05    2.20
  -5   2  -3    2.59    2.25
  -5   2  -3    2.59    1.94
   5  -2   3    4.04    2.10
   0   1 -12 1027.59   35.40
   0   1 -12 1000.23   35.37
   0  -1  12 1022.28   35.43
   0  -1  12 1000.32   35.41
   0   1 -12  987.33   35.46
   1  -4 -10  152.05    5.98
  -1   4  10  154.39    6.36
  -1   4  10  147.38    5.96
   2  -5  -6  119.59    5.32
   2  -5  -6  118.61    4.95
  -2   5   6  131.97    5.06
  -2   5   6  126.13    5.42
   2  -5  -6  110.98    5.17
  -5  -1   6  108.92    4.70
   5   1  -6  111.07    4.66
  -5  -1   6  103.53    5.04
   5   1  -6  103.50    4.44
   3  -4  -6  787.86   25.24
  -3   4   6  790.64   25.58
   3  -4  -6  764.69   25.48
  -3   4   6  852.74   25.29
   3  -4  -6  806.33   25.56
  -3   4   6  796.25   25.44
  -1   6  -2    6.71    2.21
   1  -6   2    2.69    2.54
  -1   6  -2    3.19    2.50
  -1   6  -2    6.54    2.24
   1  -6   2    4.09    2.18
   1  -6   2    9.24    2.22
   6   1  -1  135.08    4.55
   6   1  -1  100.14    4.21
   6   1  -1  119.78    4.35
   6   1  -1  119.77    4.86
   6   1  -1  114.67    5.16
   6   1  -1  135.87    5.21
   4   6   6  442.57   14.02
  -4  -6  -6  454.31   14.07
  -4  -6  -6  355.51   13.51
   4   6   6  444.89   14.19
  -4  -6  -6  451.30   14.25
  -4  -6  -6  445.91   13.96
   1  -3  10   14.31    2.52
   1  -3  10   14.71    2.43
  -1   3 -10   12.16    2.55
  -1   3 -10    5.26    2.47
  -1   3 -10   10.59    2.82
  -4   3  -5 1346.15   47.98
  -4   3  -5 1402.08   48.31
   4  -3   5 1432.34   48.32
   4  -3   5 1435.16   48.62
  -4   3  -5 1411.79   48.29
  -1  -4   9  513.74   17.89
  -1  -4   9  511.38   17.55
   1   4  -9  455.86   17.77
  -1  -4   9  507.23   17.88
   1   4  -9  496.72   17.86
  -4   3   5 1441.62   49.25
  -4   3   5 1388.35   49.06
  -4   3   5 1442.22   48.96
   4  -3  -5 1322.07   49.21
   4  -3  -5 1410.77   48.92
   0  -5   7   82.71    3.95
   0   5  -7   70.46    3.85
   0  -5   7   79.83    3.62
   0  -5   7   73.09    3.84
   0   5  -7   71.82    3.79
   0  -5   7   75.23    4.21
   5   4  -4   14.86    2.11
  -5  -4   4   17.16    3.20
   5   4  -4   15.20    2.21
  -5  -4   4   12.71    2.65
  -5  -4   4   10.96    2.57
   5   4  -4   11.53    1.24
  -5  -4   4   14.95    2.00
   5   4  -4   14.05    2.59
   5   4  -4   16.59    2.88
  -5  -4   4   12.71    2.57
   0  -6   4  167.50    6.79
   0  -6   4  172.55    6.71
   0   6  -4  177.69    6.73
   0   6  -4  168.66    6.82
  -6  -1  -4  375.41    9.95
   6   1   4  376.44   10.53
   6   1   4  401.52    9.92
   6   1   4  384.58   10.02
   6   1   4  366.29    9.70
   6   1   4  365.50    9.99
   2   7   2  637.71   22.53
  -2  -7  -2  646.25   22.79
   2   7   2  655.05   22.75
   2   7   2  629.72   22.78
   2   7   2  640.89   22.83
   2   7   2  640.70   22.78
  -2  -7  -2  635.42   22.50
   0  -6  -7  313.61   11.26
   0   6   7  314.42   11.44
   0  -6  -7  319.49   11.40
   0   6   7  311.42   11.17
   0  -6  -7  282.17   11.49
   1   6   8  183.00    6.53
  -1  -6  -8  166.33    6.79
  -1  -6  -8  161.90    6.64
   1   6   8  161.35    6.83
   1   6   8  159.59    6.57
  -1  -6  -8  165.49    6.36
  -4   1  -9  147.48    5.74
   4  -1   9  146.49    6.05
  -4   1  -9  148.55    5.66
   4  -1   9  132.97    6.32
   4  -1   9  145.20    5.50
   4  -1   9  148.27    5.82
  -4   1  -9  125.81    6.38
   0   4  -9  604.02   21.41
   0  -4   9  602.07   21.41
   0  -4   9  601.53   21.28
   2   5  -7  740.65   26.72
  -2  -5   7  740.89   26.25
  -2  -5   7  734.41   26.65
  -2  -5   7  752.34   26.72
  -2  -5   7  782.44   26.72
   2   5  -7  802.29   26.62
  -2  -5   7  772.05   26.80
  -2   3  10  134.40    5.25
   2  -3 -10  106.09    5.72
  -2   3  10  143.48    5.72
   2  -3 -10  144.29    5.30
   4  -2  -7  395.25   14.59
  -4   2   7  435.89   14.33
  -4   2   7  401.97   14.42
   4  -2  -7  422.98   14.53
  -4   2   7  388.37   14.04
   4  -1  -8   31.51    1.41
   4  -1  -8   37.87    2.92
  -4   1   8   32.93    2.62
  -4   1   8   26.59    1.37
  -4   1   8   28.86    2.58
   4  -1  -8   31.86    2.80
   0   4  11  829.56   28.56
   0   4  11  779.07   28.73
   0  -4 -11  818.66   28.56
   0  -4 -11  791.74   28.60
   0  -4 -11  830.84   28.73
   1  -1  12   29.07    2.94
   1  -1  12   26.96    2.67
  -1   1 -12   31.66    2.71
   1  -1  12   27.83    2.85
  -1   1 -12   31.33    2.99
  -1   1 -12   26.31    2.94
  -2  -7  -3   38.70    2.48
  -2  -7  -3   37.57    3.14
   2   7   3   39.36    3.21
   2   7   3   42.32    3.25
   2   7   3   38.86    3.28
   2   7   3   43.72    2.51
   2   7   3   41.37    3.17
   4   0  10  215.69    9.29
  -4   0 -10  249.18    9.02
   4   0  10  247.51    9.05
   4   0  10  253.11    8.97
   4   0  10  245.91    9.41
   6   2   5  185.69    6.57
   6   2   5  180.33    6.90
   6   2   5  162.40    7.22
  -6  -2  -5  182.15    6.60
   6   2   5  157.66    7.52
  -5  -4  -8  405.72   11.96
   5   4   8  406.30   12.40
  -5  -4  -8  412.35   12.51
  -5  -4  -8  402.87   12.38
  -5  -4  -8  406.50   12.43
   5   4   8  441.43   12.43
  -2  -7  -1  698.98   25.33
  -2  -7  -1  728.37   25.04
   2   7   1  715.58   25.04
   2   7   1  727.92   25.35
  -2  -7  -1  693.17   25.26
   2   7   1  695.87   25.25
   2   7   1  717.08   25.26
   5   2  -6  720.88   23.62
  -5  -2   6  654.21   23.30
  -5  -2   6  687.53   23.85
  -5  -2   6  652.28   23.65
   5   2  -6  651.92   23.65
   3   3  -9   76.51    3.03
  -3  -3   9   68.49    3.93
   3   3  -9   72.34    3.82
  -3  -3   9   72.61    3.94
  -3  -3   9   75.60    3.69
  -6  -3   1   -0.20    1.64
   6   3  -1    3.69    2.16
   6   3  -1    1.58    2.30
   6   3  -1    2.61    1.65
   6   3  -1    4.70    3.07
  -6  -3   1   -1.33    1.11
  -3  -4 -11    9.28    2.48
  -3  -4 -11    5.99    2.64
   3   4  11   -0.48    2.60
  -3  -4 -11    5.34    1.67
   5   5  -2  472.23   16.14
   5   5  -2  450.66   16.02
   5   5  -2  452.12   15.67
   5   5  -2  443.10   15.85
  -5  -5   2  443.64   15.84
   5   5  -2  425.73   15.45
  -5  -5   2  457.44   15.98
   5   5  -2  447.53   15.75
  -5  -5   2  455.19   16.13
   3  -1 -10   61.76    2.94
  -3   1  10   68.54    3.52
   3  -1 -10   60.61    3.65
  -3   1  10   60.84    2.85
   1  -6  -5  269.57   10.64
  -1   6   5  303.83   10.72
   1  -6  -5  295.06   10.50
  -1   6   5  286.24   10.69
   1  -6  -5  289.27   10.63
  -4  -4 -10   66.33    4.04
  -4  -4 -10   69.41    3.55
   4   4  10   80.55    4.13
  -4  -4 -10   76.27    2.96
  -4  -4 -10   72.19    3.79
  -4  -4 -10   65.22    4.05
   4   4  10   65.55    3.85
   5  -1  -5  641.49   22.68
  -5   1   5  642.16   22.56
   5  -1  -5  636.91   22.76
   5  -1  -5  643.85   22.61
  -4  -6   2  547.81   19.41
   4   6  -2  555.52   19.33
  -4  -6   2  554.45   19.50
  -4  -6   2  507.46   19.66
   4   6  -2  544.43   19.15
   4   6  -2  536.12   19.40
  -6  -2   2  425.56   14.21
   6   2  -2  413.48   14.68
   6   2  -2  425.13   14.83
   6   2  -2  429.33   14.49
   6   2  -2  363.14   14.20
   6   2  -2  404.74   14.49
  -6  -2   2  416.85   14.50
   6   3   5   15.96    2.75
   6   3   5   16.28    1.39
  -6  -3  -5   17.28    3.12
  -6  -3  -5   15.36    2.39
  -6  -3  -5   15.70    2.45
   6   3   5   13.43    2.45
   6   3   5    7.25    3.10
   0   3  12  406.69   14.12
   0   3  12  332.73   14.25
   0  -3 -12  416.75   14.25
   0  -3 -12  398.46   14.13
  -1  -7  -2 1248.14   43.42
   1   7   2 1228.20   43.39
   1   7   2 1291.16   43.36
  -1  -7  -2 1234.76   43.18
  -1  -7  -2 1278.61   43.42
   1   7   2 1241.65   43.21
   1   7   2 1272.90   43.42
  -1  -7  -2 1116.49   43.32
   5   2   9 1043.90   36.82
   5   2   9  980.76   36.94
   5   2   9 1079.50   36.60
  -5  -2  -9 1081.81   36.87
   5   2   9  950.39   37.10
  -5  -2  -9 1070.61   36.61
   5   2   9 1039.61   36.89
  -5  -2  -9 1065.10   37.04
  -3  -6  -8   79.79    3.24
  -3  -6  -8   73.95    4.48
  -3  -6  -8   88.91    4.04
   3   6   8   76.73    4.04
  -3  -6  -8   85.99    4.12
  -5   0   6   44.35    3.07
  -5   0   6   35.93    2.68
   5   0  -6   34.48    2.29
   5   0  -6   37.30    2.22
   5   0  -6   31.33    2.69
   5   0  -6   37.79    2.67
  -3   3  -8  111.80    4.99
   3  -3   8  113.03    5.33
   3  -3   8  115.14    4.55
   3  -3   8  109.13    4.84
  -3   3  -8  115.38    4.95
  -3   3  -8  112.33    4.56
   2   7   4 1064.34   37.95
   2   7   4 1080.81   37.74
  -2  -7  -4 1079.06   37.71
   2   7   4 1128.24   38.01
   2   7   4  959.48   37.94
   2   7   4 1121.55   38.00
   2   7   4 1123.68   38.02
  -2  -7  -4 1106.69   37.97
   6   0   1  819.35   29.48
   6   0   1  850.49   29.55
   6   0   1  870.44   29.60
   6   0   1  886.77   29.77
   6   0   1  850.60   29.64
  -6  -4  -2   55.47    2.92
   6   4   2   59.35    2.98
   6   4   2   57.13    3.21
  -6  -4  -2   57.49    2.70
   6   4   2   50.51    3.93
   6   4   2   57.75    2.91
   6   4   2   55.56    2.24
   6   4   2   58.14    3.12
  -3  -5 -10  132.43    5.53
  -3  -5 -10  133.19    5.33
  -3  -5 -10  121.23    5.83
   3   5  10  112.44    5.46
   2   3 -10   29.82    2.11
   2   3 -10   30.34    2.79
   1   7   1  128.11    5.55
   1   7   1  126.11    5.56
  -1  -7  -1  121.78    5.63
  -1  -7  -1  130.46    5.66
   1   7   1  127.15    5.32
  -1  -7  -1  123.08    5.46
   1   7   1  137.10    5.56
  -1  -7  -1  138.66    5.23
   3   4  -8   11.64    2.39
  -3  -4   8    7.27    2.75
  -3  -4   8   12.16    2.46
   3   4  -8    5.04    0.87
   5  -2  -3  133.82    5.31
   5  -2  -3  163.25    5.93
   5  -2  -3  144.20    6.07
  -5   2   3  149.82    6.00
   5  -2  -3  174.48    5.65
  -5   2   3  150.56    5.49
  -1  -7  -3  728.24   26.67
   1   7   3  780.49   26.68
   1   7   3  753.23   26.47
   1   7   3  776.85   26.71
  -1  -7  -3  739.99   26.43
  -1  -7  -3  745.63   26.69
   1   7   3  750.38   26.63
   2  -2 -11  591.40   21.01
   2  -2 -11  586.76   21.34
  -2   2  11  595.91   20.97
  -2   2  11  604.89   21.23
   6   0   2   80.09    3.85
  -6   0  -2   81.21    3.98
   6   0   2   76.39    2.99
   6   0   2   92.20    4.57
   6   0   2   89.62    3.24
  -6   0  -2   74.15    3.23
   6   0   2   84.61    3.10
   6   0   2   78.25    3.46
   6   0   2   76.23    3.67
   3   2  12  446.61   16.49
  -3  -2 -12  453.40   16.05
   3   2  12  446.87   16.29
   3   2  12  454.46   16.35
   6   4   3  277.32   10.76
  -6  -4  -3  283.80   10.38
   6   4   3  291.05   10.36
   6   4   3  284.34   10.38
  -6  -4  -3  274.19   10.56
  -6  -4  -3  287.78   10.25
   6   4   3  295.07   10.41
   6   4   3  292.71   10.40
   6   4   3  272.46    9.93
   2   7   0  361.79   13.45
  -2  -7   0  370.13   13.51
   2   7   0  367.57   13.48
  -2  -7   0  369.30   13.24
   2   7   0  371.01   13.22
  -2  -7   0  370.73   13.57
   2   7   0  367.63   13.48
  -2  -7   0  367.88   13.63
   3   6  -4  325.89   13.94
  -3  -6   4  394.43   13.96
   3   6  -4  388.88   13.98
  -3  -6   4  350.33   14.09
   3   6  -4  393.22   13.78
  -3  -6   4  410.59   14.26
  -3  -6   4  405.12   13.82
   3   6  -4  397.09   14.03
   6   1  -2    6.56    2.67
  -6  -1   2    4.21    1.95
   6   1  -2   10.36    1.51
   6   1  -2    8.13    1.86
   6   1  -2    8.50    2.15
   6   1  -2    8.29    0.77
   6   1  -2    9.86    2.58
  -5   2  -4  266.06   10.31
  -5   2  -4  276.43   10.19
   5  -2   4  299.60   10.35
  -1   2  12  612.13   21.92
  -1   2  12  625.15   22.07
   1  -2 -12  621.25   21.91
   6   0   0   30.46    2.51
   6   0   0   28.71    1.80
   6   0   0   20.37    1.47
   6   0   0   17.02    1.58
   6   0   0   15.80    1.76
   6   4   1  206.22    7.76
   6   4   1  192.34    7.17
   6   4   1  164.85    6.52
   6   4   1  198.77    7.02
   6   4   1  190.54    6.70
  -6  -4  -1  188.51    7.01
   6   4   1  193.26    7.12
  -6  -4  -1  182.48    7.56
   6   4   1  191.82    6.99
   1   6  -5   31.79    2.60
  -1  -6   5   27.41    2.91
   1   6  -5   35.95    2.80
  -1  -6   5   33.88    2.70
  -1  -6   5   27.49    2.99
  -5   0  -8   23.49    2.35
   5   0   8   25.93    2.78
   5   0   8   27.56    2.32
   5   0   8   23.55    1.86
  -4  -5   5   24.11    2.55
   4   5  -5   22.66    3.08
   4   5  -5   21.06    2.68
  -4  -5   5   26.26    2.79
  -4  -5   5   23.84    3.16
   4   5  -5   20.00    2.54
  -4  -5   5   22.52    3.01
  -4  -5  -9  149.36    6.51
  -4  -5  -9  131.60    5.11
  -4  -5  -9  159.56    5.74
  -4  -5  -9  145.78    5.96
  -4  -5  -9  136.43    5.98
  -4  -5  -9  150.68    5.13
  -5  -3  -9   26.17    1.98
   5   3   9   24.30    3.66
  -5  -3  -9   27.24    2.84
  -5  -3  -9   26.58    3.19
   5   3   9   24.77    1.70
   5   3   9   26.61    3.02
   5   3   9   29.27    2.83
  -5  -3  -9   30.01    1.71
   1   1 -12  363.07   12.83
  -1  -1  12  369.12   12.75
   1   1 -12  311.48   12.81
   1   1 -12  354.92   12.67
  -4  -2 -11  491.78   17.08
  -4  -2 -11  482.06   17.38
   4   2  11  471.96   17.35
   4   2  11  477.40   17.65
   3  -5  -1 1721.04   59.42
  -3   5   1 1669.33   59.42
   3  -5  -1 1710.35   59.31
  -3  -7  -2  929.66   32.19
   3   7   2  922.22   32.59
   3   7   2  912.07   32.58
  -3  -7  -2  909.14   32.49
   3   7   2  860.37   32.50
   3   7   2  959.98   32.20
   3   7   2  926.47   32.45
  -3  -7  -2  906.50   32.44
   6   1   5  464.18   13.87
   6   1   5  446.34   13.82
   6   1   5  479.10   13.70
  -6  -1  -5  442.40   13.71
   6   1   5  442.53   14.23
  -3   5   0   63.86    3.83
   3  -5   0   65.85    3.80
   3  -5   0   64.98    3.50
   3   7   3   53.98    3.53
  -3  -7  -3   61.47    2.79
   3   7   3   60.34    3.76
   3   7   3   65.16    2.77
   3   7   3   56.54    3.82
  -3  -7  -3   49.07    3.54
  -3  -7  -3   51.38    3.50
   3   7   3   63.94    3.79
   3   1  12  341.82   12.70
  -3  -1 -12  337.95   12.82
   3   1  12  340.49   12.60
  -3  -1 -12  352.87   12.44
  -1   6  -3  427.26   15.16
   1  -6   3  425.66   15.22
   1  -6   3  430.81   15.31
   1  -6   3  412.54   15.17
  -1   6  -3  409.05   15.29
  -1   6  -3  426.98   15.19
  -1  -7   0   39.06    3.22
   1   7   0   35.58    2.95
  -1  -7   0   40.62    2.98
   1   7   0   36.57    3.16
  -1  -7   0   32.32    3.05
   1   7   0   37.94    2.97
  -1  -7   0   34.89    2.69
   1   7   0   31.65    2.69
   1   7   0   29.02    3.01
  -2   5  -5  536.47   18.95
   2  -5   5  542.37   19.25
  -2   5  -5  528.71   19.23
  -2  -6   5  372.75   13.51
   2   6  -5  364.49   13.46
   2   6  -5  377.17   13.29
  -2  -6   5  382.83   13.57
  -2  -6   5  378.24   13.35
  -2  -6   5  346.41   12.93
   2   6  -5  382.26   13.45
  -2  -6   5  384.40   13.49
   2  -4  -9    3.47    2.83
   2  -4  -9    7.92    2.05
   2  -4  -9    5.44    2.50
  -2   4   9    5.82    2.03
  -2   4   9    6.92    2.72
   6   0   3 1278.39   48.01
   6   0   3 1464.53   48.33
   6   0   3 1569.74   48.76
  -6   0  -3 1489.01   48.36
   6   0   3 1451.75   48.28
   6   0   3 1441.36   48.30
  -6   0  -3 1441.48   48.12
   6   4   4  110.02    4.86
  -6  -4  -4  128.21    5.17
  -6  -4  -4  116.58    4.69
  -6  -4  -4  119.09    4.83
   6   4   4  118.77    4.83
   6   4   4  118.35    5.37
   6   4   4  105.85    4.02
  -3  -2  10  124.25    5.20
   3   2 -10  108.90    5.33
  -3  -2  10  120.71    5.37
  -3  -2  10  119.63    4.86
   3   2 -10  137.55    4.85
   5   5   7  795.71   28.07
  -5  -5  -7  779.35   28.14
  -5  -5  -7  800.86   27.82
   5   5   7  809.52   28.15
  -5  -5  -7  786.11   28.13
  -2  -4   9   13.31    2.69
   2   4  -9   15.31    1.65
  -2  -4   9   12.58    2.72
   2   4  -9   16.18    2.45
   2   4  -9   14.82    2.57
   1   7   4  328.63   11.56
   1   7   4  308.52   11.34
   1   7   4  312.63   11.64
  -1  -7  -4  306.19   11.60
   1   7   4  307.59   11.59
   1   7   4  328.31   11.54
   1   7   4  307.69   11.36
  -1  -7  -4  311.30   11.27
  -1  -7  -4  298.21   11.48
  -4  -6  -7    2.73    2.40
  -4  -6  -7    0.14    2.64
   4   6   7    2.31    2.31
  -4  -6  -7    1.29    2.12
  -4  -6  -7    2.03    0.60
   3   7   1  358.81   13.28
   3   7   1  356.95   13.08
   3   7   1  337.65   13.21
   3   7   1  364.37   12.76
   3   7   1  358.55   13.22
  -3  -7  -1  337.88   13.06
  -3  -7  -1  368.58   12.78
   3   7   1  359.18   13.18
  -3  -7  -1  363.07   13.12
   3  -5  -2  181.22    6.55
   3  -5  -2  157.77    6.59
  -3   5   2  163.17    6.90
  -3   5   2  160.75    6.18
  -3   5   2  167.43    6.59
   3  -5  -2  180.35    6.84
   4  -2   8  106.20    5.29
  -4   2  -8  107.07    4.40
   4  -2   8  110.11    4.76
  -4   2  -8  106.75    4.77
   4  -2   8  114.52    4.31
  -4   2  -8  107.05    4.73
   4  -4   0  597.46   20.45
  -4   4   0  535.31   20.58
  -4   4   0  573.72   20.58
  -4   4   0  581.45   20.22
   4  -4   0  589.18   20.61
   5   1   9  130.19    5.24
   5   1   9  125.70    5.65
   5   1   9  140.72    5.73
   5   1   9  130.85    5.33
  -5  -1  -9  142.69    5.31
   6   0  -1  169.17    5.96
   6   0  -1  174.76    6.61
  -6   0   1  160.07    6.01
   6   0  -1  170.59    6.38
   6   0  -1  169.31    5.97
   6   0  -1  155.12    5.82
   6   0  -1  155.49    6.05
  -6  -4   0  866.51   31.39
   6   4   0  848.11   30.83
   6   4   0  895.06   31.13
  -6  -4   0  878.08   31.02
   6   4   0  918.92   31.03
   6   4   0  899.16   31.04
   6   4   0  919.12   31.44
   6   4   0  920.85   31.18
   6   3  -2   26.63    3.35
   6   3  -2   21.74    1.94
  -6  -3   2   25.97    1.32
  -6  -3   2   26.99    1.86
   6   3  -2   28.23    2.61
   6   3  -2   27.34    2.43
  -6  -3   2   24.51    2.44
  -2  -7  -5  287.56   10.76
   2   7   5  297.60   10.82
  -2  -7  -5  282.02   10.39
   2   7   5  277.77   10.68
   2   7   5  298.05   10.85
   2   7   5  289.23   10.43
   2   7   5  296.99   10.88
   0  -5 -10   -4.49    3.05
   0   5  10    1.27    2.44
   0   5  10   -0.59    3.10
   0  -5 -10   -0.98    2.51
   0  -5 -10   -3.37    2.37
  -2  -2  11  624.75   22.07
   2   2 -11  623.86   21.96
   4  -4  -1  194.41    7.73
  -4   4   1  205.60    7.73
  -4   4   1  202.17    7.21
   4  -4  -1  210.01    7.41
  -4   4   1  163.40    7.69
  -1  -1 -13  227.89    8.99
  -1  -1 -13  234.46    9.15
   1   1  13  237.35    8.87
  -1  -1 -13  236.57    8.93
  -1  -1 -13  238.43    8.85
   1   1  13  230.46    9.01
   1   1  13  232.85    8.96
   3  -5   1  106.49    4.89
  -3   5  -1  114.29    4.40
   3  -5   1  109.29    5.06
  -3   5  -1  112.13    5.07
   3   7   4  121.76    5.42
   3   7   4  139.44    5.68
   3   7   4  117.82    5.66
   3   7   4  118.75    5.60
  -3  -7  -4  128.82    4.82
   3   7   4  125.21    4.82
  -3  -7  -4  124.49    5.41
  -6  -2  -6   12.03    1.62
   6   2   6    2.80    2.41
   6   2   6    3.30    3.01
   6   2   6    9.86    1.50
   6   2   6    4.70    2.94
  -3   4  -6   61.45    2.72
   3  -4   6   68.03    4.07
  -3   4  -6   57.85    3.51
   3  -4   6   34.34    3.18
  -3   4  -6   59.88    3.28
   3  -4   6   58.14    2.81
   3  -1  11   20.60    2.84
  -3   1 -11   23.07    3.21
  -3   1 -11   23.54    2.70
  -3   1 -11   24.45    2.57
   3  -1  11   20.96    2.52
   3  -1  11   21.83    2.52
  -4  -3 -11   45.91    2.36
  -4  -3 -11   36.18    3.45
  -4  -3 -11   36.15    3.12
   4   3  11   43.41    3.69
   4   3  11   39.99    3.42
   4   3  -8   17.69    3.04
  -4  -3   8   19.60    2.87
  -4  -3   8   20.05    2.20
   4   3  -8   16.04    2.66
  -4  -3   8   20.34    3.07
  -4  -3   8   23.63    2.84
  -4   4  -1  500.15   18.49
   4  -4   1  557.83   18.52
   4  -4   1  543.49   18.39
  -4   4  -1  495.08   18.04
  -4   4  -1  546.40   18.50
   3   3  12  146.57    6.50
  -3  -3 -12  162.21    5.91
   3   3  12  162.38    6.64
   3   3  12  137.99    6.29
   2  -2  11   14.14    2.79
   2  -2  11    9.17    2.47
   2  -2  11   11.71    2.41
  -2   2 -11   14.76    2.49
  -2   2 -11   10.76    2.38
  -2   2 -11    9.81    2.81
   4   1  11    1.32    2.38
   4   1  11    2.15    2.11
   4   1  11    3.76    2.70
  -4  -1 -11    2.98    2.04
   4   1  11    0.71    2.69
   2   7  -1   69.88    4.10
  -2  -7   1   46.57    4.03
   2   7  -1   71.55    3.95
  -2  -7   1   65.55    4.02
  -2  -7   1   67.84    3.43
  -2  -7   1   64.26    4.10
  -2  -7   1   73.17    3.71
   2   7  -1   73.82    3.39
   5  -1   7    7.68    2.33
  -5   1  -7   12.04    2.02
  -5   1  -7    9.44    2.36
   5  -1   7    9.05    1.14
   4   1  -9 1204.01   42.84
  -4  -1   9 1240.13   42.83
  -2   5   7    3.74    2.96
  -2   5   7    0.97    2.13
   2  -5  -7   -2.87    2.27
   2  -5  -7    1.67    2.95
  -2   5   7    1.47    2.81
   2  -5  -7    5.31    2.15
  -1   6   6   72.99    2.87
  -1   6   6   78.70    3.96
   1  -6  -6   76.49    3.74
   1  -6  -6   71.91    3.78
  -6  -3  -6  258.95    9.21
   6   3   6  256.25    9.67
   6   3   6  260.07    9.18
  -6  -3  -6  263.21    9.65
  -6  -3  -6  277.10   10.02
   6   3   6  261.49    9.84
   6   3   6  228.99   10.05
   4  -3   6  641.84   22.63
   4  -3   6  649.19   22.95
  -4   3  -6  656.16   22.98
   4  -3   6  647.18   23.30
  -4   3  -6  661.28   23.00
  -4   3  -6  646.54   22.63
  -1   4  -9  196.45    7.78
   1  -4   9  207.32    7.83
   1  -4   9  204.49    7.86
  -1  -2 -13   51.59    3.46
   1   2  13   50.18    3.38
   1   2  13   42.35    3.47
  -1  -2 -13   47.83    3.50
  -1  -2 -13   46.71    3.08
   1   2  13   51.68    3.11
  -4   3   6  845.93   29.84
   4  -3  -6  857.74   29.64
  -4   3   6  851.35   29.66
   4  -3  -6  835.12   30.01
   2   6   9    5.31    2.37
  -2  -6  -9   13.07    2.54
  -2  -6  -9   10.98    1.89
  -2  -6  -9   10.17    2.73
   2   6   9   12.19    2.79
  -4  -4   7 1101.99   37.83
  -4  -4   7 1069.34   37.93
   4   4  -7 1102.04   37.68
  -4  -4   7 1055.37   37.78
  -4  -4   7 1067.55   37.61
   4   4  -7 1048.52   37.77
  -4   0   9   58.56    2.61
  -4   0   9   66.79    3.61
  -4   0   9   68.58    3.62
   4   0  -9   64.73    3.68
  -1   5   9  413.15   14.39
  -1   5   9  396.53   14.02
   1  -5  -9  422.58   14.46
   1  -5  -9  371.84   14.37
  -1   5   9  395.06   14.66
   5   6   2   71.19    3.71
   5   6   2   62.92    2.61
  -5  -6  -2   68.57    3.21
   5   6   2   65.19    3.69
   5   6   2   76.44    4.48
  -5  -6  -2   70.86    4.37
   5   6   2   64.25    3.83
  -5  -6  -2   68.83    3.72
   5   6   2   69.86    3.19
   2  -4   8  749.45   27.01
  -2   4  -8  777.12   27.00
   2  -4   8  767.02   26.79
  -2   4  -8  722.87   26.86
  -2   4  -8  783.67   26.77
  -5  -3   6 1613.08   59.23
   5   3  -6 1766.30   59.11
   5   3  -6 1623.26   59.05
  -5  -3   6 1711.18   59.04
  -5  -3   6 1706.48   58.85
  -5  -3   6 1700.81   59.09
  -5  -3   6 1698.05   58.97
   5   6   3  407.10   13.37
  -5  -6  -3  390.50   13.05
   5   6   3  408.44   13.07
  -5  -6  -3  386.59   13.76
  -5  -6  -3  373.23   13.12
   5   6   3  411.22   13.47
   5   6   3  400.39   13.64
   5   6   3  333.41   12.70
  -5  -6  -3  375.92   13.32
  -4   4   2  631.34   20.11
   4  -4  -2  670.90   19.84
  -4   4   2  646.21   19.76
   4  -4  -2  615.72   20.09
   5   5  -3  250.69    8.32
  -5  -5   3  234.43    8.07
   5   5  -3  224.68    7.88
   5   5  -3  184.85    7.20
   5   5  -3  234.38    8.13
  -5  -5   3  237.01    7.85
   5   5  -3  238.98    7.72
  -5  -5   3  238.24    8.25
   3  -4  -7  544.78   19.83
  -3   4   7  593.24   20.21
  -3   4   7  541.22   20.09
   3  -4  -7  548.88   20.09
  -3   4   7  595.73   19.89
   3  -4  -7  563.32   20.19
  -3   2 -10  767.90   26.67
  -3   2 -10  748.38   26.70
   3  -2  10  750.49   26.90
  -3   2 -10  747.63   27.00
   3  -2  10  769.47   26.60
   3  -2  10  749.64   26.75
   6   2  -3  498.31   18.80
  -6  -2   3  519.28   18.82
  -6  -2   3  572.18   19.19
   6   2  -3  566.55   19.25
   6   2  -3  593.46   19.46
   6   2  -3  576.51   19.17
  -6  -2   3  604.37   19.12
   0   1  13  682.99   23.68
   0  -1 -13  658.88   23.83
   0   1  13  663.36   23.82
   0  -1 -13  633.53   23.95
   0  -1 -13  675.86   23.81
   0  -1 -13  707.44   23.88
   3   7   0  153.81    5.73
   3   7   0  144.91    6.23
   3   7   0  138.48    6.22
  -3  -7   0  157.64    6.35
   3   7   0  142.68    6.28
   3   7   0  156.21    6.34
   3   7   0  147.78    6.14
  -3  -7   0  144.31    5.75
   3  -5  -3   38.01    2.61
   3  -5  -3   31.15    3.03
   3  -5  -3   32.61    2.91
  -3   5   3   33.91    2.06
  -3   5   3   34.67    2.82
  -3   5   3   36.81    3.10
   1   7  -1  133.50    5.91
   1   7  -1  139.50    5.69
   1   7  -1  137.78    6.07
  -1  -7   1  140.28    5.91
  -1  -7   1  140.31    5.92
  -1  -7   1  150.55    6.14
  -1  -7   1  127.22    5.87
  -1  -7   1  144.56    5.65
   2  -1  12    4.19    2.43
   2  -1  12    5.62    2.69
   2  -1  12    5.44    2.63
   2  -1  12    5.44    2.83
  -2   1 -12    6.56    2.70
  -2   1 -12    5.90    2.38
  -2   1 -12    3.08    2.95
   6   0   4  524.64   16.01
  -6   0  -4  487.89   15.72
   6   0   4  399.50   15.58
   6   0   4  481.94   16.04
   6   0   4  525.18   16.50
   6   0   4  492.56   16.01
   6   0   4  427.15   15.61
  -6   0  -4  504.04   16.01
   6   4   5  397.73   12.67
  -6  -4  -5  398.90   12.24
  -6  -4  -5  403.85   12.18
  -6  -4  -5  389.35   12.43
   6   4   5  391.42   12.26
   6   4   5  406.84   12.28
   5  -2  -4  220.22    7.40
   5  -2  -4  170.53    6.68
  -5   2   4  230.69    7.04
   5  -2  -4  205.81    7.18
   5  -2  -4  226.20    7.41
   0  -6   5  325.74   12.23
   0   6  -5  341.54   12.18
   0   6  -5  329.04   12.24
   0  -6   5  336.67   12.17
   0   6   8   89.48    4.17
   0  -6  -8   83.82    3.91
   0   6   8   82.01    3.73
   0  -6  -8   83.49    4.39
   0  -6  -8   80.87    4.13
   4   6  -3  166.63    7.21
  -4  -6   3  181.12    7.12
   4   6  -3  166.51    6.88
   4   6  -3  179.11    7.03
  -4  -6   3  153.76    7.43
  -4  -6   3  193.92    6.97
   4   6  -3  176.67    6.67
   6   1  -3    1.68    1.79
   6   1  -3    2.64    1.96
   6   1  -3    0.07    2.53
  -6  -1   3   -0.25    1.71
  -6  -1   3   -0.52    2.07
   6   1  -3    2.23    2.40
   6   1  -3    1.38    2.36
  -1  -7  -5    2.84    2.52
   1   7   5    9.02    2.24
  -1  -7  -5    9.62    2.13
  -1  -7  -5    2.33    2.69
   1   7   5    2.43    2.41
   1   7   5    8.70    2.54
   1   7   5    7.57    2.31
   1   7   5    3.34    2.87
  -1   5  -7  450.94   16.32
   1  -5   7  465.84   16.30
   1  -5   7  469.30   16.18
   1  -5   7  405.12   16.14
  -1   5  -7  465.75   16.15
  -5  -4   5   53.07    3.56
   5   4  -5   59.22    3.04
  -5  -4   5   46.82    3.89
  -5  -4   5   57.10    3.37
   5   4  -5   56.73    3.60
  -5  -4   5   51.10    3.36
   5   4  -5   54.72    3.60
   5   4  -5   52.13    2.25
  -5  -4   5   57.64    2.94
   5   4  -5   54.82    3.13
   5   6   1  209.31    8.05
   5   6   1  197.90    8.07
   5   6   1  205.26    8.01
  -5  -6  -1  208.87    8.04
  -5  -6  -1  208.53    7.65
   5   6   1  210.63    7.46
   5   6   1  205.35    7.77
  -5  -6  -1  203.88    8.39
   5   6   1  219.54    8.43
   2   4  12  222.37    8.65
  -2  -4 -12  223.26    8.61
  -2  -4 -12  226.79    8.71
  -1  -4 -12   97.99    4.74
  -1  -4 -12   94.27    4.51
   1   4  12  104.31    4.52
  -1  -4 -12   92.16    4.59
  -5   2  -5   74.59    3.52
   5  -2   5   69.60    3.66
  -5   2  -5   69.87    3.64
   4  -4   2  317.41   11.74
   4  -4   2  312.24   11.65
  -4   4  -2  326.94   11.74
   4  -4   2  326.97   11.26
  -4   4  -2  317.93   11.18
  -4   4  -2  315.15   11.75
   4  -4   2  298.25   11.66
   3  -5   2  297.03   11.04
   3  -5   2  273.40   10.89
   3  -5   2  307.35   10.62
  -3   5  -2  294.02   11.01
  -3   5  -2  294.99   10.57
   5   6   4  312.32   11.25
  -5  -6  -4  304.67   11.94
  -5  -6  -4  303.49   11.24
  -5  -6  -4  320.91   11.56
   5   6   4  320.30   11.57
   5   6   4  323.56   11.69
  -5  -6  -4  300.37   11.40
   5   6   4  327.48   11.98
   3   7   5    4.24    3.10
  -3  -7  -5    2.57    1.44
   3   7   5    1.75    1.65
   3   7   5    1.36    2.67
   3   7   5    4.87    3.04
  -3  -7  -5    2.05    2.36
  -3  -7  -5    4.17    2.64
   6   4  -1  577.87   20.43
   6   4  -1  568.10   20.42
   6   4  -1  573.48   20.66
  -6  -4   1  600.25   20.47
  -6  -4   1  556.21   20.82
   6   4  -1  596.00   20.86
  -6   0   2  173.47    6.67
   6   0  -2  181.38    6.64
   6   0  -2  180.41    6.48
   6   0  -2  188.12    7.16
   6   0  -2  179.58    6.70
   6   0  -2  183.76    7.06
  -1  -5   8  378.32   13.37
  -1  -5   8  362.48   13.72
   1   5  -8  379.14   13.72
   1   5  -8  380.49   13.65
  -1  -5   8  369.24   13.75
  -1  -5   8  387.42   13.86
   1   0  13  137.18    5.49
   1   0  13  129.45    5.54
  -1   0 -13  133.62    5.47
   1   0  13  122.38    5.56
  -1   0 -13  129.28    5.70
  -1   0 -13  126.28    5.75
   3  -2 -10  408.30   15.43
   3  -2 -10  447.81   15.42
  -3   2  10  428.98   15.30
  -3   2  10  416.40   14.95
  -1  -6  -9 1195.89   41.16
   1   6   9 1169.07   41.32
   1   6   9 1191.78   41.20
   1   6   9 1123.07   41.38
  -1  -6  -9 1169.27   41.33
  -1  -6  -9 1203.17   41.39
   0   0 -13    3.55    2.68
   0   0 -13    0.63    3.07
   0   0  13    4.62    2.33
   0   0 -13    2.36    2.66
   0   0  13    4.34    2.74
  -2  -5 -11   13.12    2.73
   2   5  11   10.71    2.69
  -2  -5 -11    7.23    2.82
  -2  -5 -11    9.43    2.66
  -2  -5 -11   13.11    3.00
   5   1  -7  974.39   30.08
  -5  -1   7  980.37   30.20
   5   1  -7 1000.18   29.91
  -5  -1   7 1042.89   30.08
   0  -3  11  278.60   10.13
   0   3 -11  262.16   10.23
   0  -3  11  281.60   10.38
   0   3 -11  283.85   10.34
  -5  -4  -9  190.68    6.77
  -5  -4  -9  169.76    6.39
  -5  -4  -9  182.40    7.15
   5   4   9  201.43    7.28
  -5  -4  -9  194.06    7.45
  -5  -4  -9  187.68    7.28
   5   4   9  177.66    7.55
   5   4   9  192.21    7.22
  -3  -5   7  220.11    8.42
  -3  -5   7  211.13    8.22
   3   5  -7  212.38    8.19
  -2  -2 -13    8.18    2.84
   2   2  13   12.93    2.47
  -2  -2 -13   12.00    2.52
   2   2  13    7.56    2.72
   2   2  13   12.86    2.85
  -2  -2 -13    8.38    2.75
   3  -3  -9  474.79   17.82
   3  -3  -9  508.04   17.39
  -3   3   9  495.76   17.37
  -3   3   9  473.25   17.65
  -6  -1  -6   50.73    2.39
   6   1   6   69.00    3.51
   6   1   6   67.33    3.42
  -6  -1  -6   65.90    3.02
   6   1   6   62.95    4.07
   6   1   6   71.22    3.02
   2   1  13   26.63    2.93
   2   1  13   17.17    2.86
  -2  -1 -13   28.00    3.17
   2   1  13   20.42    2.90
   2   1  13   26.51    2.82
  -2  -1 -13   24.13    2.57
  -2  -1 -13   29.15    3.04
   0   7   2  109.87    5.17
   0  -7  -2  108.22    5.03
   0   7   2  107.47    5.00
   0   7   2  117.34    4.83
   0  -7  -2  121.57    5.19
   0  -7  -2  115.40    4.83
   0  -7  -2   98.73    5.17
   5  -1  -6  246.93    9.38
  -5   1   6  249.95    9.20
   5  -1  -6  252.64    9.47
   5  -1  -6  250.74    9.28
   2  -6  -1  433.24   14.87
   2  -6  -1  417.69   14.84
  -2   6   1  417.07   14.97
   2  -6  -1  416.37   15.02
  -2   6   1  410.85   14.66
  -2   6   1  393.49   14.86
   2  -6  -1  400.10   14.48
  -2   6   1  420.15   14.94
   2   7   6  155.06    6.06
   2   7   6  142.07    6.16
   2   7   6  146.91    5.60
  -2  -7  -6  139.40    6.02
  -2  -7  -6  144.69    5.50
   2   7   6  138.27    6.03
   2   7   6  155.29    6.20
  -2  -7  -6  124.12    6.03
   0  -2  12  110.90    5.12
   0   2 -12  112.18    5.08
   0   2 -12  118.19    5.03
   0  -2  12  113.13    4.81
   0  -2  12  117.80    5.09
   0   2 -12  107.47    4.99
  -2   3 -10    7.96    2.35
   2  -3  10    5.38    2.38
   2  -3  10   13.46    2.65
   2  -3  10   11.98    2.78
  -2   3 -10    9.24    2.51
   0   7   1    2.22    2.40
   0   7   1    3.39    2.42
   0  -7  -1    0.55    2.80
   0   7   1    2.40    2.79
   0  -7  -1    0.84    2.16
   0  -7  -1    3.66    2.31
   0  -7  -1   -0.07    2.71
   0  -2 -13  344.82   12.84
   0  -2 -13  362.47   12.92
   0   2  13  346.72   12.84
   4  -4  -3   42.71    3.07
   4  -4  -3   49.38    2.47
  -4   4   3   44.69    2.34
  -4   4   3   43.98    3.25
  -3   0 -12  747.86   25.57
  -3   0 -12  716.46   25.83
   3   0  12  711.89   25.61
   3   0  12  724.89   25.62
   3   0  12  747.12   25.78
  -3   0 -12  698.86   25.74
   2  -6  -2  110.72    5.07
  -2   6   2  118.30    4.79
  -2   6   2  118.77    5.22
  -2   6   2  113.16    5.14
  -2   6   2  112.88    5.27
   2  -6  -2  119.06    4.95
   2  -6  -2  124.00    5.08
   2  -6  -2  114.41    5.46
   2   0 -12  658.81   23.05
  -2   0  12  642.56   23.22
  -3  -6  -9   97.05    5.01
   3   6   9   85.64    4.36
   3   6   9   67.69    4.39
  -3  -6  -9   94.57    3.54
  -3  -6  -9   85.85    4.30
  -3  -6  -9   92.99    4.42
   4  -2  -8 1904.77   64.01
  -4   2   8 1961.29   63.80
  -4   2   8 1860.88   63.88
   4  -2  -8 1851.96   63.96
  -4   2   8 1751.95   63.59
   1  -6   4  860.91   30.93
  -1   6  -4  877.01   30.92
   1  -6   4  882.53   31.09
  -1   6  -4  875.04   31.11
   1  -6   4  891.53   30.98
  -1   6  -4  892.05   30.97
  -4  -2   9 1107.84   36.62
  -4  -2   9 1062.34   36.33
   4   2  -9 1065.50   36.70
  -4  -2   9 1102.22   36.48
  -4  -2   9 1029.38   36.68
  -4  -2   9  968.40   36.32
  -1  -5 -11  138.91    5.91
   1   5  11  139.22    5.73
  -1  -5 -11  139.97    5.91
   1   5  11  120.90    5.96
  -1  -5 -11  136.90    5.81
  -1  -3  11    6.37    2.67
  -1  -3  11    4.63    1.88
   1   3 -11    5.89    2.14
   1   3 -11    4.30    2.35
  -2   6   0  168.13    6.95
   2  -6   0  173.25    6.79
  -2   6   0  160.95    6.82
  -2   6   0  174.84    6.98
   2  -6   0  170.35    6.86
   2  -6   0  173.45    6.99
   0  -7  -3  368.76   14.08
   0  -7  -3  402.65   14.00
   0  -7  -3  375.06   14.16
   0   7   3  397.90   14.22
   0  -7  -3  397.83   14.15
   0   7   3  379.61   14.09
   0   7   3  392.02   14.02
  -5  -6   0   64.52    2.88
   5   6   0   63.05    3.84
   5   6   0   72.11    4.39
   5   6   0   63.77    3.26
  -5  -6   0   65.34    3.60
   5   6   0   49.58    3.58
   5   6   0   61.84    3.55
   5   6   0   63.81    2.81
   3   7  -1  690.84   25.72
  -3  -7   1  735.87   25.89
   3   7  -1  739.11   25.46
  -3  -7   1  758.58   25.77
   3   7  -1  670.87   25.70
   3   7  -1  703.79   25.81
   3   7  -1  707.06   25.78
  -3  -7   1  750.91   25.51
   3   7  -1  744.94   25.72
   3  -5  -4 1710.54   58.52
  -3   5   4 1624.64   58.74
   3  -5  -4 1635.28   58.63
  -3   5   4 1689.24   58.56
   3  -5  -4 1658.38   58.69
  -3   5   4 1710.39   58.41
  -2  -7   2  649.99   25.11
  -2  -7   2  703.27   25.24
   2   7  -2  705.25   25.11
  -2  -7   2  705.00   25.19
   2   7  -2  716.97   25.13
  -2  -7   2  741.21   24.96
  -2  -7   2  729.04   25.15
   2   7  -2  699.51   24.93
   6   3  -3  287.60   10.43
   6   3  -3  270.42   10.79
  -6  -3   3  301.14   10.82
   6   3  -3  304.44   11.08
   6   3  -3  291.56   10.93
  -6  -3   3  293.50   10.71
   6   3  -3  311.39   10.70
  -6  -3   3  289.28   10.42
   0  -5   8   29.30    2.99
   0   5  -8   30.81    2.86
   0  -5   8   27.00    2.97
   0   5  -8   24.79    2.73
   0  -5   8   34.58    3.40
   0  -5   8   32.15    2.58
  -5  -6  -5  219.79    9.54
  -5  -6  -5  229.77    9.08
  -5  -6  -5  238.23    9.18
   5   6   5  255.31    9.22
   5   6   5  240.03    8.85
  -5  -6  -5  249.32    8.85
   5   2  -7   26.62    2.59
  -5  -2   7   22.11    2.83
  -5  -2   7   25.03    3.30
  -5  -2   7   28.66    1.75
   5   2  -7   24.49    2.87
  -3  -6   5  578.08   20.34
   3   6  -5  587.84   20.04
  -3  -6   5  561.09   20.40
   3   6  -5  567.46   20.28
  -3  -6   5  583.04   20.21
  -3  -6   5  543.64   20.08
   3   6  -5  516.54   20.22
   3   6  -5  576.04   20.19
   0  -7   0   18.52    2.85
   0   7   0   30.38    2.80
   0   7   0   21.55    2.52
   0   7   0   24.81    3.02
   0  -7   0   23.95    2.55
   0  -7   0   24.75    2.66
   0  -7   0   25.06    3.03
  -5  -5  -8  369.46   13.09
   5   5   8  366.40   13.47
  -5  -5  -8  367.64   13.50
  -5  -5  -8  353.01   13.44
   5   5   8  376.56   13.41
  -4  -6  -8  162.85    5.75
  -4  -6  -8  132.86    5.03
  -4  -6  -8  154.55    6.11
  -4  -6  -8  161.52    6.01
   4   6   8  146.06    5.80
  -4  -6  -8  169.30    6.63
   2  -1 -12   44.52    3.42
  -2   1  12   50.48    2.94
   2  -1 -12   47.46    2.90
  -2   1  12   51.90    3.22
  -1   4  11  692.26   24.00
   1  -4 -11  693.66   23.93
  -1   4  11  698.26   24.23
   1  -4 -11  636.11   23.98
  -5   0   7  340.38   12.61
  -5   0   7  352.97   12.45
   5   0  -7  338.83   12.18
   5   0  -7  342.61   12.44
   5   0  -7  340.08   12.11
   4  -4   3   67.02    3.71
  -4   4  -3   60.61    3.59
   4  -4   3   62.66    2.78
  -4   4  -3   60.18    2.45
   4  -4   3   70.24    3.76
  -4   4  -3   63.65    3.57
   4  -4   3   67.56    3.65
   4  -1  10   35.35    2.84
   4  -1  10   37.24    2.44
   4  -1  10   30.26    3.23
   4  -1  10   44.00    3.52
  -4   1 -10   31.56    3.67
  -4   1 -10   33.72    2.80
  -4   1 -10   34.65    2.78
  -1  -7   2  184.37    7.48
   1   7  -2  181.21    7.58
   1   7  -2  179.68    7.53
   1   7  -2  191.75    7.27
  -1  -7   2  202.15    7.54
  -1  -7   2  188.14    7.67
  -1  -7   2  189.88    7.24
  -6   0  -5  382.79   11.84
   6   0   5  355.48   11.89
   6   0   5  377.80   11.82
   6   0   5  361.64   11.87
   6   0   5  357.00   12.28
   6   0   5  316.78   11.39
   6   0   5  275.87   11.36
  -6   0  -5  364.65   11.53
   3   0 -11  166.80    6.94
  -3   0  11  174.37    6.50
  -3   0  11  171.49    6.54
  -3   0  11  177.50    6.84
  -6  -2  -7  522.17   17.33
   6   2   7  553.32   17.86
   6   2   7  555.50   17.67
  -6  -2  -7  436.79   17.13
   6   2   7  536.69   17.32
  -6  -2  -7  541.11   18.00
  -2   6   3 1383.40   48.01
  -2   6   3 1357.96   47.74
   2  -6  -3 1340.32   47.76
   2  -6  -3 1371.09   47.88
  -2   6   3 1393.46   47.91
   2  -6  -3 1361.76   47.95
   2  -6  -3 1403.05   47.87
  -2   6   3 1352.55   47.91
  -1   3  12   42.41    3.37
  -1   3  12   34.36    2.82
  -6  -4  -6  743.23   20.82
   6   4   6  763.14   20.65
  -6  -4  -6  735.09   20.62
   6   4   6  662.62   20.89
   6   4   6  783.03   20.65
  -6  -4  -6  760.92   20.57
   4  -1  -9  228.66    7.99
   4  -1  -9  243.24    8.64
  -4   1   9  221.44    8.42
   4  -1  -9  236.68    8.60
  -4   1   9  223.33    8.48
  -4   1   9  210.23    7.87
  -2  -5   8    5.15    2.94
  -2  -5   8    8.31    2.82
   2   5  -8    3.30    2.72
  -2  -5   8    5.28    2.93
  -2  -5   8    8.19    2.67
  -2  -5   8    6.38    1.18
   2   5  -8    5.97    2.36
   5   2  10  854.89   30.47
  -5  -2 -10  827.46   30.63
  -5  -2 -10  908.90   30.18
   5   2  10  867.97   30.75
   5   2  10  809.67   30.40
   5   2  10  864.59   30.18
   1   6  -6  443.68   15.95
  -1  -6   6  434.33   15.98
  -1  -6   6  445.42   15.94
  -1  -6   6  448.78   16.10
  -1  -6   6  438.59   16.00
   1   6  -6  426.58   15.87
  -1  -6   6  452.33   15.71
  -1  -3 -13  284.43   10.40
   1   3  13  277.63   10.33
  -1  -3 -13  266.16   10.31
   3  -5   3 1042.04   36.42
  -3   5  -3 1038.10   36.09
   3  -5   3 1000.55   36.36
  -3   5  -3 1051.84   36.40
   3  -5   3 1037.26   36.14
   6   3   7   -0.33    1.22
   6   3   7    3.81    2.85
  -6  -3  -7   -0.13    1.32
  -6  -3  -7    0.64    0.71
  -6  -3  -7    4.56    2.62
  -6  -3  -7   -3.04    3.07
   6   3   7   -1.38    2.49
  -2   5  -6 1141.85   39.58
  -2   5  -6 1155.24   39.83
   2  -5   6 1121.66   39.85
   2  -5   6 1100.94   39.91
   2  -6   1  642.27   22.43
  -2   6  -1  623.44   22.48
  -2   6  -1  647.56   22.25
   2  -6   1  627.38   22.37
  -2   6  -1  600.10   22.36
   2  -6   1  634.01   22.49
   1  -2  12  117.80    5.09
   1  -2  12  119.87    5.39
   1  -2  12  107.35    5.05
  -1   2 -12  127.90    5.27
   1  -2  12  114.48    5.26
  -1   2 -12  113.36    5.25
  -1   2 -12  115.11    5.04
  -3  -7  -6  421.55   14.69
   3   7   6  416.21   15.26
  -3  -7  -6  407.96   15.07
   3   7   6  415.23   15.18
  -3  -7  -6  415.23   15.02
  -1  -7  -6 1017.45   35.64
  -1  -7  -6 1004.25   35.41
   1   7   6 1013.27   35.47
   1   7   6 1012.84   35.55
   1   7   6  989.04   35.46
  -1  -7  -6 1040.17   35.63
   1   7   6 1029.21   35.63
   1   7   6  998.62   35.68
   4   4  11   11.68    2.87
  -4  -4 -11    9.64    2.81
  -4  -4 -11   12.25    1.61
  -4  -4 -11    9.05    2.88
   4   4  11   13.23    3.09
  -4  -4 -11   10.40    2.49
   1   2 -12  102.46    4.41
   1   2 -12  100.80    4.75
  -1  -2  12  101.11    4.67
  -1  -2  12   97.08    4.80
   0  -7  -4  144.41    5.78
   0   7   4  151.29    6.05
   0  -7  -4  141.14    6.12
   0  -7  -4  137.02    5.92
   0   7   4  139.58    6.01
   0   7   4  150.81    5.87
   0  -7  -4  130.01    5.89
  -4  -5   6   74.53    4.23
  -4  -5   6   84.76    4.19
   4   5  -6   84.25    3.95
  -4  -5   6   84.45    4.50
  -4  -5   6   77.06    4.11
  -4  -5 -10  904.16   30.23
  -4  -5 -10  846.31   29.91
  -4  -5 -10  861.63   30.60
  -4  -5 -10  849.52   30.36
   5   0   9    8.84    1.81
  -5   0  -9   13.18    2.28
   5   0   9   12.27    2.64
   5   0   9    6.79    2.29
  -1   6   7    4.91    2.51
  -1   6   7    4.41    1.23
   1  -6  -7    7.03    2.45
   1  -6  -7    6.47    2.46
   4   0  11  143.50    5.91
  -4   0 -11  139.46    5.57
   4   0  11  130.85    5.49
  -4   0 -11  132.85    6.03
   4   0  11  136.02    5.57
   6   4  -2   12.26    2.81
  -6  -4   2    5.98    3.00
  -6  -4   2   12.22    2.21
   6   4  -2   16.74    3.15
   6   4  -2    4.73    2.89
  -6  -4   2   14.15    2.83
   6   4  -2   11.36    1.88
   6   4  -2   14.24    2.17
   6   0  -3  272.05    9.94
   6   0  -3  292.70   10.53
  -6   0   3  290.72   10.08
  -6   0   3  284.84   10.23
   6   0  -3  294.65   10.25
   6   0  -3  282.95   10.26
   6   0  -3  288.14   10.49
  -1  -4  10  365.53   13.79
   1   4 -10  389.11   13.80
   1   4 -10  375.98   13.52
  -1  -4  10  381.58   13.41
  -1  -4  10  364.55   13.75
   5   3  10  422.37   15.48
   5   3  10  424.49   15.41
   5   3  10  419.16   15.73
  -5  -3 -10  436.57   14.95
  -5  -3 -10  407.65   15.54
  -5  -3 -10  407.06   15.41
  -2   3  11  305.05   10.96
   2  -3 -11  299.11   10.77
  -2   3  11  305.75   11.29
   4   7   2 1124.23   39.13
  -4  -7  -2 1123.34   39.01
   4   7   2 1129.86   38.62
   4   7   2 1104.48   39.10
  -4  -7  -2 1064.18   38.86
   4   7   2 1127.29   38.89
  -4  -7  -2 1117.10   38.64
   4   7   2 1093.06   38.99
  -4  -7  -2 1085.21   38.71
   4   7   3   22.55    3.24
   4   7   3   21.32    3.23
  -4  -7  -3   13.80    2.62
   4   7   3   20.66    2.67
  -4  -7  -3   20.51    1.71
  -4  -7  -3   17.04    2.91
   4   7   3   20.02    1.60
  -4  -7  -3   19.45    2.19
   4   7   3   22.63    2.91
   6  -1   1  941.16   33.10
  -6   1  -1  953.69   33.34
  -6   1  -1  956.20   33.13
   6  -1   1  940.23   33.28
   3  -3   9   82.56    3.56
   3  -3   9   72.59    4.26
   3  -3   9   72.47    3.97
  -3   3  -9   77.30    3.58
  -3   3  -9   76.98    3.92
  -3  -1  11  258.22    9.20
  -3  -1  11  254.91    9.47
   3   1 -11  227.79    9.46
   5  -3   0    4.91    1.92
   5  -3   0    0.92    2.34
   5  -3   0    2.81    2.38
  -5   3   0    3.56    2.42
  -5   3   0    5.52    2.35
   2   1 -12  225.60    8.60
  -2  -1  12  235.22    8.59
   6   5   2   24.60    2.84
  -6  -5  -2   21.42    2.54
   6   5   2   22.14    2.71
  -6  -5  -2   16.81    2.60
   6   5   2   19.69    2.69
  -6  -5  -2   16.52    3.24
   6   5   2   21.00    2.21
   6   5   2   20.35    1.29
   6   5   2   20.51    1.66
   2   3  13    1.23    2.62
   2   3  13    0.50    2.82
  -2  -3 -13    0.98    2.37
  -2  -3 -13   -0.35    2.61
   2   3  13    2.99    3.15
   3   5  11  489.68   18.42
  -3  -5 -11  517.27   18.46
  -3  -5 -11  528.48   18.42
  -3  -5 -11  513.49   18.64
   1  -3  11  115.63    5.02
  -1   3 -11  113.09    4.99
  -1   3 -11  118.31    5.24
  -1   3 -11  110.54    5.09
   1  -3  11  112.46    5.06
   6   5   3  466.31   14.73
  -6  -5  -3  451.09   15.35
   6   5   3  416.50   14.43
   6   5   3  455.80   14.86
   6   5   3  467.54   14.94
  -6  -5  -3  449.52   14.90
   6   5   3  461.72   14.97
   6   5   3  404.65   14.31
   6   5   3  366.10   14.31
  -6  -5  -3  463.28   14.88
   0   4 -10  486.55   17.35
   0  -4  10  480.47   17.16
   0  -4  10  482.32   17.36
  -3  -4 -12   99.24    4.70
  -3  -4 -12   89.92    4.86
  -3  -4 -12  107.03    4.22
   3   4  12  102.75    5.11
   3   4  12   95.84    4.73
  -6  -2   4  281.63    9.47
   6   2  -4  283.55    9.87
   6   2  -4  294.10    9.57
  -6  -2   4  268.85    9.58
  -6  -2   4  233.16    9.01
  -5   3  -1   76.97    4.25
  -5   3  -1   84.52    4.13
   5  -3   1   78.96    4.05
   5  -3   1   90.51    4.05
   5  -3   1   80.51    3.85
  -2  -6   6  141.23    6.18
   2   6  -6  141.69    5.94
  -2  -6   6  145.71    5.91
  -2  -6   6  145.92    5.84
  -2  -6   6  133.16    5.11
  -2  -6   6  142.23    5.95
   2   6  -6  143.56    5.76
   2   6  -6  141.42    6.06
   6  -1   0   16.26    2.58
  -6   1   0    8.24    2.09
   6  -1   0   10.26    1.89
   0  -4 -12  175.68    6.92
   0   4  12  166.57    6.64
   0  -4 -12  160.39    6.53
   0  -4 -12  168.43    6.67
   0   4  12  159.91    6.87
   5  -2  -5   40.23    2.98
  -5   2   5   39.47    2.49
   5  -2  -5   38.51    2.98
   5  -2  -5   39.25    2.68
  -4   4   4   99.62    4.66
   4  -4  -4   96.30    4.56
   4  -4  -4   91.90    3.88
  -4   4   4   95.17    4.04
   2   0  13  464.78   17.05
  -2   0 -13  467.94   17.09
  -2   0 -13  451.59   17.10
  -2   0 -13  487.06   16.90
   2   0  13  453.07   16.94
   2   0  13  498.89   17.03
   6  -1   2   11.28    2.58
   6  -1   2    8.67    1.80
  -6   1  -2    8.50    1.93
  -6   1  -2    9.19    2.68
  -6  -1   4  281.55    9.95
   6   1  -4  275.58   10.18
  -6  -1   4  273.67   10.10
   6   1  -4  292.02   10.38
   6   1  -4  280.10   10.09
   6   1  -4  256.57    9.98
   0   7  -1  363.18   13.32
   0   7  -1  369.99   13.23
   0  -7   1  366.41   13.23
   0  -7   1  365.62   13.40
   0   7  -1  366.37   13.54
   0  -7   1  351.49   13.39
   0  -7   1  363.17   13.19
  -5  -5   4  211.19    9.23
  -5  -5   4  225.95    8.93
   5   5  -4  241.39    8.98
  -5  -5   4  242.90    8.76
   5   5  -4  234.39    8.63
  -5  -5   4  229.58    8.89
   5   5  -4  234.26    9.06
   5   5  -4  228.18    8.78
   5  -3  -1    4.18    2.47
   5  -3  -1    3.52    1.74
  -5   3   1    2.94    0.88
  -5   3   1    2.87    2.46
   5  -3  -1    3.76    2.34
  -5   3   1    3.72    2.59
  -5  -6   1  295.86   10.92
   5   6  -1  297.08   10.56
   5   6  -1  287.88   10.77
   5   6  -1  302.15   11.31
   5   6  -1  262.56   11.12
   5   6  -1  305.92   11.04
   5   6  -1  292.24   11.04
   5   6  -1  306.63   10.95
   1  -1 -13    9.63    2.61
  -1   1  13    7.63    2.40
   1  -1 -13   12.20    2.56
   4   7   1   74.15    4.43
  -4  -7  -1   70.25    3.22
  -4  -7  -1   71.56    3.26
   4   7   1   73.27    3.81
   4   7   1   78.05    4.14
   4   7   1   73.61    3.15
   4   7   1   74.51    4.50
  -4  -7  -1   73.44    3.94
   6   5   1   23.73    1.67
  -6  -5  -1   23.44    3.51
   6   5   1   24.41    2.89
   6   5   1   25.42    2.89
   6   5   1   26.61    1.85
   6   5   1   21.08    2.66
  -6  -5  -1   22.49    2.55
   6   5   1   26.52    2.13
   4   7   4  461.00   16.37
   4   7   4  453.54   16.52
   4   7   4  444.92   15.83
  -4  -7  -4  464.41   16.14
  -4  -7  -4  464.92   15.85
   4   7   4  428.68   16.50
   4   7   4  474.74   16.24
  -4  -7  -4  424.33   16.39
  -4  -7  -4  425.32   16.19
   5  -2   6   30.59    3.34
   5  -2   6   28.15    2.65
  -5   2  -6   34.41    2.48
  -5   2  -6   38.86    2.82
   3  -4   7  143.88    5.41
   3  -4   7  122.54    5.77
  -3   4  -7  137.77    5.31
   3  -4   7  143.03    6.19
  -3   4  -7  126.43    5.83
  -3   4  -7  145.72    5.83
  -3  -3  10    6.23    2.63
   3   3 -10   10.03    1.57
   3   3 -10    4.37    2.74
  -3  -3  10    5.28    2.56
  -3  -3  10    0.35    2.64
   4  -3   7  375.27   13.82
   4  -3   7  364.63   13.05
   4  -3   7  357.46   13.39
  -4   3  -7  382.02   13.46
  -4   3  -7  374.40   13.42
  -4   3  -7  368.52   13.05
  -3   1  11  243.06    8.74
  -3   1  11  236.84    8.57
  -3   1  11  243.10    9.10
   3  -1 -11  237.40    8.75
   3  -1 -11  242.83    9.23
  -2   5   8    6.96    2.29
  -2   5   8    7.22    2.99
  -2   5   8    6.07    2.89
   2  -5  -8   10.09    2.21
   2  -5  -8    9.85    2.82
   2  -5  -8   11.97    2.60
  -5  -6  -6    6.82    2.70
  -5  -6  -6   11.44    2.14
   5   6   6   10.26    2.91
  -5  -6  -6    3.81    2.90
   5   6   6    4.11    2.21
  -2   6   4  196.96    7.61
   2  -6  -4  197.54    7.59
  -2   6   4  198.25    7.72
   2  -6  -4  194.94    7.36
  -2   6   4  204.57    7.44
   2  -6  -4  188.83    7.59
  -2   6   4  198.13    7.96
   2  -6  -4  186.10    7.88
   5  -1   8   11.65    1.48
   5  -1   8   15.77    3.05
  -5   1  -8   14.58    2.48
  -5   1  -8   14.15    2.31
   5  -1   8   11.93    2.46
   1   0 -13  107.11    5.16
   1   0 -13  121.73    5.03
   4  -3  -7    0.57    1.32
  -4   3   7    1.15    1.37
   4  -3  -7    1.10    2.58
  -4   3   7    1.96    2.27
  -6  -5  -4  256.14    8.94
  -6  -5  -4  240.04    9.51
  -6  -5  -4  235.35    8.92
   6   5   4  247.58    9.00
   6   5   4  262.46    8.92
   6   5   4  213.96    8.34
   6   5   4  236.20    8.75
   4   6  -4 1123.43   38.45
  -4  -6   4 1098.45   38.28
  -4  -6   4 1099.46   38.36
   4   6  -4 1048.78   38.13
   4   6  -4 1112.93   38.35
   4   6  -4 1085.07   38.25
  -2  -7  -7   58.38    3.76
  -2  -7  -7   58.12    3.62
   2   7   7   62.25    3.77
  -2  -7  -7   54.54    2.84
   2   7   7   59.03    3.69
   2   7   7   53.49    3.77
   3   4  -9   21.22    1.39
  -3  -4   9   24.96    2.97
   3   4  -9   21.82    2.89
  -3  -4   9   26.55    2.82
   0   1 -13  964.91   34.55
   0  -1  13  951.23   34.60
   0   1 -13  999.98   34.60
   0   1 -13  992.87   34.68
   0  -1  13 1005.87   34.58
   5  -3   2   27.44    2.79
   5  -3   2    9.91    2.45
  -5   3  -2   19.99    2.83
   5  -3   2   33.49    2.75
  -5   3  -2   16.70    2.93
  -4   2  -9  932.57   31.39
   4  -2   9  896.72   31.63
  -4   2  -9  868.88   31.22
   4  -2   9  872.20   31.15
   4  -2   9  916.50   31.37
   6  -1  -1  192.72    7.65
   6  -1  -1  200.86    7.13
   6  -1  -1  209.95    7.38
  -6   1   1  182.58    7.09
   6  -1  -1  204.89    7.11
   6  -1  -1  227.48    7.72
   6  -1  -1  194.76    7.12
   3   7  -2  280.66   10.19
  -3  -7   2  267.11   10.39
  -3  -7   2  257.68    9.92
   3   7  -2  270.34   10.23
   3   7  -2  274.96   10.28
   3   7  -2  265.83    9.87
  -3  -7   2  277.61   10.27
   3  -5  -5  238.62    8.50
   3  -5  -5  230.47    9.10
  -3   5   5  230.45    9.20
  -3   5   5  234.16    8.95
   3  -5  -5  240.17    8.76
   3  -5  -5  226.13    9.01
  -3   5   5  239.39    8.75
   2  -4 -10   77.28    3.93
  -2   4  10   70.14    4.09
  -2   4  10   76.50    3.54
   2  -4 -10   59.27    4.12
   2  -4 -10   74.44    3.53
  -5  -1 -10  200.51    7.22
   5   1  10  192.91    7.27
   5   1  10  173.87    7.48
   5   1  10  187.39    7.55
   5   1  10  191.52    7.20
  -2   6  -2  902.56   30.86
   2  -6   2  881.07   30.98
  -2   6  -2  890.53   31.11
   2  -6   2  903.25   31.04
  -2   6  -2  813.49   30.97
   2  -6   2  863.02   30.86
   2  -6   2  913.75   31.13
   6   1   7   11.40    1.86
   6   1   7   13.45    2.54
  -6  -1  -7   11.14    2.01
   6   1   7    8.95    1.97
   6   1   7   12.41    3.03
  -6  -1  -7    9.78    1.39
   6   1   7   12.37    2.58
   3  -4  -8 1145.14   37.33
   3  -4  -8 1125.90   37.08
   3  -4  -8 1107.88   37.41
  -3   4   8 1155.48   37.08
  -3   4   8  967.53   36.87
  -3   4   8 1091.79   37.30
   6  -1   3  455.97   17.42
  -6   1  -3  470.20   17.03
  -6   1  -3  465.29   16.79
   6  -1   3  507.60   17.02
   0   7   5  299.44   11.03
   0  -7  -5  292.18   10.96
   0   7   5  296.30   11.13
   0  -7  -5  297.43   11.11
   0   7   5  313.26   10.74
   0  -7  -5  275.39   11.21
  -5   3   2   -0.06    2.59
   5  -3  -2   -1.54    1.57
  -5   3   2   -2.33    2.62
   5  -3  -2   -2.04    2.65
   5  -3  -2    1.69    1.63
   5  -3  -2    0.28    2.44
  -5   3   2    1.34    1.20
   4  -4   4  236.68    9.36
  -4   4  -4  240.85    9.35
   4  -4   4  255.09    8.87
  -4   4  -4  246.90    9.38
   4  -4   4  253.02    9.30
  -4   4  -4  241.67    8.71
  -2  -6 -10   -0.39    2.02
  -2  -6 -10   -2.64    2.90
  -2  -6 -10   -1.99    3.21
   2   6  10    0.35    2.81
  -2  -6 -10   -2.35    2.67
  -2  -6 -10    0.96    2.51
   0  -6   6  535.26   18.90
   0   6  -6  521.39   18.92
   0  -6   6  532.80   18.94
   0   6  -6  528.97   18.92
   0  -6   6  532.14   18.95
   0  -6   6  523.83   18.95
  -1   1 -13   25.82    3.05
  -1   1 -13   25.67    2.94
  -1   1 -13   28.11    3.01
   1  -1  13   29.97    2.92
   1  -1  13   23.49    2.95
   1  -1  13   31.12    2.87
   0  -6  -9  562.57   20.24
   0  -6  -9  552.93   20.44
   0   6   9  605.79   20.12
   0   6   9  577.03   20.34
   0  -6  -9  530.09   20.31
   2   7  -3   55.24    3.58
   2   7  -3   52.71    3.60
  -2  -7   3   50.30    3.60
  -2  -7   3   47.37    3.27
   2   7  -3   51.25    3.84
  -2  -7   3   40.03    3.56
  -2  -7   3   52.21    3.84
   2   7  -3   54.55    3.06
   4   2  12   89.12    4.47
   4   2  12   92.40    4.86
  -4  -2 -12   83.72    4.65
  -4  -2 -12   96.46    3.98
   0   3  13 2493.90   85.60
   0  -3 -13 2392.03   85.61
   0  -3 -13 2492.33   85.67
  -6  -5   0  741.38   25.48
   6   5   0  686.04   25.46
   6   5   0  713.31   25.25
   6   5   0  746.43   25.56
   6   5   0  758.45   25.62
   6   5   0  720.23   25.24
  -6  -5   0  718.10   25.85
   6   5   0  713.42   25.27
   4   7   0  204.92    7.68
  -4  -7   0  199.53    7.79
   4   7   0  201.17    7.97
  -4  -7   0  194.19    7.32
   4   7   0  194.14    7.26
  -4  -7   0  194.51    7.14
   4   7   0  196.77    7.81
   4   7   5  179.57    6.65
   4   7   5  165.57    6.83
   4   7   5  153.22    5.93
  -4  -7  -5  175.33    6.50
   4   7   5  158.31    6.87
  -4  -7  -5  166.58    5.93
  -4  -7  -5  161.85    6.70
   4   7   5  160.48    7.09
  -4  -7  -5  171.24    6.56
   0   5  11    3.44    3.26
   0   5  11    0.18    2.62
   0  -5 -11    2.68    2.66
   0  -5 -11    0.82    2.96
   0  -5 -11    1.68    2.66
  -2   2  12    8.43    2.78
   2  -2 -12    8.67    2.32
  -2   2  12   11.00    2.16
   2  -2 -12   10.66    2.93
   2   3 -11  188.33    6.59
   2   3 -11  149.40    6.96
   3   2  13 1022.05   33.94
  -3  -2 -13  970.03   33.70
   3   2  13 1027.12   34.08
   3   2  13  979.37   33.92
   6   0   6   21.56    1.38
  -6   0  -6   23.01    2.47
  -6   0  -6   21.75    1.84
   6   0   6   27.78    2.53
   6   0   6   25.52    2.70
   6   0   6   21.09    3.46
   6   0   6   16.52    2.73
  -5  -3   7    8.94    3.14
  -5  -3   7   15.66    1.09
  -5  -3   7   11.55    2.87
  -5  -3   7   16.94    2.18
  -5  -3   7   18.33    1.94
   5   3  -7   13.78    2.79
   5   3  -7   18.07    2.86
   1   7  -3   57.38    3.70
   1   7  -3   56.07    3.37
  -1  -7   3   50.75    3.69
   1   7  -3   46.49    3.63
  -1  -7   3   55.31    3.28
  -1  -7   3   62.80    3.65
  -1  -7   3   63.40    3.97
  -6  -4  -7  166.65    5.87
   6   4   7  150.04    5.76
   6   4   7  197.01    6.71
   6   4   7  205.26    6.73
  -6  -4  -7  200.85    6.73
  -6  -4  -7  200.18    6.72
  -6  -4  -7  194.65    6.93
  -5  -4   6   60.77    3.47
   5   4  -6   68.00    3.94
  -5  -4   6   61.43    3.15
   5   4  -6   61.33    3.49
  -5  -4   6   61.56    3.87
   5   4  -6   54.77    2.44
   5   4  -6   67.27    3.88
  -5  -4   6   68.36    3.70
  -5  -4   6   67.56    4.25
  -1   5  10    5.22    3.26
  -1   5  10    2.12    1.18
   1  -5 -10    3.01    2.53
   1  -5 -10    0.12    2.62
  -1   5  10    5.60    2.33
   1  -6   5   34.02    3.18
  -1   6  -5   54.01    3.61
  -1   6  -5   44.92    3.31
  -1   6  -5   42.33    3.11
   1  -6   5   40.06    3.22
   1  -6   5   34.42    3.23
  -3   5  -4  472.41   16.24
   3  -5   4  456.12   16.62
  -3   5  -4  461.11   16.63
   3  -5   4  444.88   16.30
   6   3  -4  617.83   21.87
  -6  -3   4  624.52   21.55
   6   3  -4  603.10   21.95
   6   3  -4  607.34   21.58
  -6  -3   4  611.05   21.82
  -6  -3   4  620.93   21.87
  -6  -5  -5   41.88    3.36
  -6  -5  -5   39.65    3.24
   6   5   5   41.15    3.01
  -6  -5  -5   39.68    3.70
  -6  -5  -5   40.36    1.97
   6   5   5   47.38    3.22
  -3  -7  -7    3.30    1.50
   3   7   7    1.55    2.86
  -3  -7  -7    4.77    2.68
   3   7   7    0.75    2.92
  -3  -7  -7    1.25    2.64
   0  -7   2  624.32   23.73
   0  -7   2  656.75   23.65
   0  -7   2  671.47   23.70
   0  -7   2  683.93   23.83
   0  -7   2  670.36   23.64
   0   7  -2  678.69   23.72
   0   7  -2  682.49   23.66
   0   7  -2  669.13   23.87
   1   7   7   68.44    3.58
  -1  -7  -7   62.90    3.45
  -1  -7  -7   67.91    4.02
   1   7   7   71.82    4.16
  -1  -7  -7   70.01    3.95
   1   7   7   70.28    3.69
   1   7   7   74.92    3.82
  -5   3  -3 1678.28   53.22
   5  -3   3 1714.15   53.24
   5  -3   3 1670.40   53.30
  -5   3  -3 1689.07   53.32
   2   4 -10 1026.88   34.19
  -2  -4  10  981.12   34.24
   2   4 -10  994.54   33.89
   2   4 -10  961.83   34.22
  -2  -4  10  990.65   34.23
  -2  -4  10  852.74   34.14
  -2   4  -9  266.64    9.69
   2  -4   9  255.08   10.03
  -2   4  -9  255.86    9.85
   2  -4   9  263.97    9.73
  -1   2  13  552.47   19.48
   1  -2 -13  552.72   19.45
  -1   2  13  528.74   19.66
  -4  -4   8    3.35    2.20
  -4  -4   8    3.79    2.95
   4   4  -8    5.42    2.57
   4   4  -8    5.01    2.90
  -4  -4   8    8.16    3.30
  -4  -4   8    5.74    2.99
   4   4  -8    4.17    0.73
   6  -1  -2   63.70    2.48
   6  -1  -2   60.53    2.89
  -6   1   2   57.88    2.35
   6  -1  -2   45.08    1.94
   6  -1  -2   69.26    3.36
   6  -1  -2   68.19    3.12
   4   3  12   46.02    3.76
  -4  -3 -12   51.07    2.66
   4   3  12   47.21    3.98
  -4  -3 -12   55.52    3.82
  -4  -3   9  943.03   32.70
  -4  -3   9  922.28   32.33
   4   3  -9  938.86   32.70
  -4  -3   9  910.75   32.66
   4   3  -9  928.80   32.62
   4   3  -9  935.26   32.27
  -4  -3   9  903.72   32.46
   5  -1  -7  287.57   10.01
   5  -1  -7  255.81   10.07
   5  -1  -7  251.52    9.56
  -5   1   7  279.59    9.99
  -5   1   7  287.44    9.93
  -5  -4 -10  114.51    5.40
  -5  -4 -10  109.61    5.20
  -5  -4 -10  110.49    5.18
  -5  -4 -10  113.65    4.20
   5   4  10  119.37    5.28
   5   4  10  108.74    5.28
   5   4  10  122.79    5.69
  -5  -4 -10  111.24    4.69
  -1  -6 -10  118.63    5.49
   1   6  10  123.86    5.26
  -1  -6 -10  121.10    5.01
  -1  -6 -10  111.81    5.32
   1  -5   8  346.56   12.75
  -1   5  -8  368.25   12.93
  -1   5  -8  331.41   12.68
   1  -5   8  347.52   12.69
  -3  -1 -13   -1.84    2.42
   3   1  13   -0.33    2.71
  -3  -1 -13    2.68    3.04
   3   1  13    2.41    2.84
   6   4  -3  920.00   30.76
   6   4  -3  868.38   30.95
   6   4  -3  857.32   30.51
   6   4  -3  860.76   30.47
  -6  -4   3  840.57   30.83
   6   4  -3  886.34   30.85
  -6  -4   3  856.78   30.75
  -6  -4   3  858.30   30.51
  -6  -4   3  921.08   30.76
  -6   0   4  878.09   27.90
   6   0  -4  873.03   27.90
   6   0  -4  854.49   27.94
   6   0  -4  897.94   28.12
   6   0  -4  877.10   28.08
  -6   0   4  869.49   27.77
   6   0  -4  717.50   27.57
  -2   6   5   15.62    2.78
  -2   6   5   18.79    2.96
   2  -6  -5   19.67    2.75
   2  -6  -5   17.19    2.61
   2  -6  -5   11.99    2.16
   2  -6  -5    7.87    2.89
  -2   6   5   22.88    3.35
  -5  -6   2   51.42    3.31
   5   6  -2   49.33    3.41
   5   6  -2   52.83    3.65
   5   6  -2   45.42    3.67
   5   6  -2   53.00    3.21
  -5  -6   2   51.19    3.54
   5   6  -2   50.13    2.74
   6   2   8  160.45    6.92
   6   2   8  168.55    7.20
  -6  -2  -8  172.22    6.39
   6   2   8  176.38    6.40
  -6  -2  -8  171.08    7.40
  -3  -2  11  281.53   10.10
   3   2 -11  252.09   10.29
  -3  -2  11  252.90   10.30
  -3  -2  11  274.45    9.91
   3   2 -11  285.08    9.90
  -4  -6  -9  337.10   12.11
  -4  -6  -9  338.05   13.07
  -4  -6  -9  368.17   12.62
  -4  -6  -9  374.37   12.77
  -5  -5  -9   33.12    3.37
   5   5   9   36.66    3.18
  -5  -5  -9   31.97    3.16
  -5  -5  -9   40.71    2.57
   5   5   9   36.03    3.20
   4  -4  -5   15.76    2.90
  -4   4   5   14.67    1.94
  -4   4   5    9.60    2.25
   4  -4  -5   11.57    1.80
  -4   4   5    9.37    2.86
   6  -1   4 1037.68   34.92
  -6   1  -4  976.47   34.75
   6  -1   4  974.30   35.30
  -6   1  -4  995.11   34.95
   6   3   8   31.94    3.09
  -6  -3  -8   29.55    1.77
  -6  -3  -8   26.57    1.63
  -6  -3  -8   34.01    3.42
   6   3   8   29.48    3.32
  -6  -3  -8   35.63    2.96
   6   3   8   31.51    1.80
   4   1  12   46.25    3.68
  -4  -1 -12   48.72    3.02
   4   1  12   55.66    3.19
   4   1  12   57.25    3.33
   1  -4  10   71.54    3.98
   1  -4  10   75.41    3.95
  -1   4 -10   75.12    3.86
   4   1 -10  154.17    6.39
  -4  -1  10  154.20    6.45
  -3  -6 -10   25.25    2.91
  -3  -6 -10   19.82    3.02
  -3  -6 -10   17.95    1.79
  -3  -6 -10   17.11    3.51
   3   6  10   16.04    2.90
  -5   3   3   30.68    1.92
   5  -3  -3   22.42    3.04
  -5   3   3   28.95    3.04
   5  -3  -3   31.09    1.79
   5  -3  -3   21.49    2.73
   5  -3  -3   31.65    1.85
  -4   0  10  644.67   22.59
   4   0 -10  651.62   22.65
  -4   0  10  624.92   22.22
   1   1 -13  363.88   12.93
   1   1 -13  339.47   13.19
  -1  -1  13  352.14   12.97
   1   1 -13  365.23   13.11
  -5  -6  -7  647.05   22.49
   5   6   7  605.28   22.16
   5   6   7  627.60   22.42
  -5  -6  -7  643.47   22.15
  -5  -6  -7  625.04   22.39
  -3   1 -12    7.81    3.23
   3  -1  12   11.72    2.68
   3  -1  12   10.57    2.58
  -3   1 -12   11.98    2.74
  -3   1 -12   11.30    2.57
   3  -1  12    8.20    2.83
  -5  -1   8  332.50   12.79
   5   1  -8  400.50   13.12
  -5  -1   8  419.94   13.40
  -5  -1   8  402.14   13.58
   5   1  -8  399.99   13.41
   3   3  13  201.95    8.15
   3   3  13  212.77    8.23
  -3  -3 -13  201.33    7.74
   3   3  13  215.36    8.37
   3  -2  11   74.25    3.68
  -3   2 -11   72.55    3.89
   3  -2  11   78.62    4.11
   3  -2  11   75.10    4.37
  -3   2 -11   80.47    4.66
  -3   2 -11   79.01    3.90
  -2   6  -3  343.15   12.14
   2  -6   3  328.44   12.19
  -2   6  -3  345.51   12.50
   2  -6   3  330.81   12.32
   2  -6   3  329.37   12.42
   6   5  -1  124.40    5.54
   6   5  -1  104.77    4.58
   6   5  -1  121.64    4.44
   6   5  -1  117.17    4.57
   6   5  -1  100.25    4.85
  -6  -5   1  121.05    4.90
  -6  -5   1  104.62    5.59
   6   5  -1  113.18    5.28
  -2   2 -12   61.50    3.59
   2  -2  12   58.27    3.57
  -2   2 -12   55.28    3.68
   2  -2  12   52.47    3.32
  -2   2 -12   60.20    3.90
   2  -2  12   58.22    3.73
   2  -2  12   50.58    3.40
  -3  -6   6   19.35    3.13
   3   6  -6   21.56    2.67
  -3  -6   6   19.56    3.48
   3   6  -6   20.64    3.03
  -3  -6   6   19.98    2.83
  -3  -6   6   20.74    2.94
   4   7  -1  222.70    8.45
   4   7  -1  226.41    8.11
  -4  -7   1  213.80    7.84
  -4  -7   1  229.70    8.56
  -4  -7   1  229.35    8.91
  -4  -7   1  218.49    8.20
   4   7  -1  212.00    8.55
   1  -6  -8   24.46    2.73
   1  -6  -8   25.75    2.76
  -1   6   8   26.16    2.96
  -4  -7  -6    7.60    3.05
  -4  -7  -6    8.33    1.14
  -4  -7  -6   11.88    2.66
  -4  -7  -6    5.73    2.55
   4   7   6   12.78    2.66
   0   7   6   64.24    3.07
   0  -7  -6   56.55    3.44
   0  -7  -6   59.79    3.73
   0   7   6   69.85    3.74
   0  -7  -6   55.51    3.83
   0   7   6   64.68    3.88
  -3  -5   8  301.31   11.91
   3   5  -8  340.59   11.90
  -3  -5   8  328.29   12.13
  -3   3  10  152.10    5.60
  -3   3  10  146.50    6.11
   3  -3 -10  130.09    6.26
   2   2 -12  137.09    5.46
  -2  -2  12  137.90    5.70
  -1  -5   9    4.82    2.95
   1   5  -9    1.71    2.77
  -1  -5   9    2.09    2.66
   1   5  -9    2.21    2.64
  -1  -5   9    1.58    2.72
  -1  -5   9    1.48    1.76
   4  -2  -9    4.28    3.05
  -4   2   9    7.11    1.28
   4  -2  -9   -0.52    3.05
  -4   2   9    5.12    2.58
  -4   2   9    8.81    2.20
   5  -2  -6   27.31    3.10
   5  -2  -6   34.36    3.12
  -5   2   6   32.51    2.55
   5  -2  -6   36.04    2.75
  -6  -2   5  576.21   19.35
   6   2  -5  608.98   19.45
  -6  -2   5  506.46   18.95
   6   2  -5  584.86   19.46
  -6  -2   5  591.61   19.46
  -6  -1   5  142.93    5.79
   6   1  -5  152.06    5.99
  -6  -1   5  148.19    6.07
   6   1  -5  159.20    5.97
   6   1  -5  147.85    5.98
   6   1  -5  148.15    5.93
  -2  -5 -12  598.12   21.72
  -2  -5 -12  614.01   21.63
  -2  -5 -12  590.76   21.58
  -2  -5 -12  601.08   21.66
   2   5  12  615.73   21.60
  -6  -5  -6    5.62    2.73
   6   5   6    9.81    2.87
  -6  -5  -6    7.33    1.26
   6   5   6    8.95    2.57
  -6  -5  -6   11.06    2.83
   3   7  -3   74.81    4.07
   3   7  -3   70.78    3.65
   3   7  -3   74.00    4.39
  -3  -7   3   73.36    4.17
   3   7  -3   75.28    4.26
  -3  -7   3   72.72    4.57
  -3  -7   3   78.73    3.82
  -2   5  -7 1482.89   51.66
  -2   5  -7 1501.98   51.44
   2  -5   7 1438.05   51.72
   2  -5   7 1495.29   51.75
   2  -5   7 1448.95   51.47
  -3   5   6   70.32    3.57
   3  -5  -6   70.77    4.02
   3  -5  -6   66.37    3.52
   3  -5  -6   74.85    2.97
  -3   5   6   69.99    4.11
  -3   5   6   75.71    4.02
   3  -5  -6   72.01    3.97
  -2  -7  -8   10.53    1.98
  -2  -7  -8    6.08    2.87
   2   7   8   10.51    2.95
  -2  -7  -8   11.52    2.96
   2   7   8    7.11    3.16
   2   7   8    5.35    3.01
   1   1  14  101.22    4.89
   1   1  14  111.45    4.88
   1   1  14   98.78    4.96
  -1  -1 -14  109.73    4.90
  -1  -1 -14  106.16    4.98
  -1  -1 -14   97.85    5.26
   2   4  13    5.44    3.27
   2   4  13    7.51    2.70
  -2  -4 -13   15.14    2.95
  -2  -4 -13   12.57    3.03
   3  -2 -11   53.74    2.91
  -3   2  11   45.54    3.45
  -3   2  11   48.81    2.58
   3  -2 -11   49.57    3.71
   3  -2 -11   55.74    3.65
  -5   2  -7  717.36   23.38
   5  -2   7  744.63   23.37
  -5   2  -7  646.21   23.28
   5  -2   7  660.06   23.73
   5  -2   7  626.28   22.93
  -5  -2   8  114.91    5.09
  -5  -2   8  106.67    4.30
  -5  -2   8  120.85    5.49
   5   2  -8  115.35    5.11
   5   0  -8   94.33    4.47
  -5   0   8   93.94    4.34
  -5   0   8   93.90    4.69
   5   0  -8   90.24    3.78
   4  -4   5  145.74    5.92
  -4   4  -5  141.89    5.20
  -4   4  -5  134.60    5.99
  -4   4  -5  143.24    5.99
  -5   3  -4  356.69   13.04
   5  -3   4  356.40   13.05
  -5   3  -4  355.71   12.92
   1   4  13    1.23    2.57
  -1  -4 -13    0.94    2.79
  -1  -4 -13   -0.79    2.82
   1  -7  -2  735.73   26.61
  -1   7   2  759.02   26.76
  -1   7   2  737.14   26.65
  -1   7   2  773.79   26.57
   1  -7  -2  732.18   26.64
   1  -7  -2  783.51   26.73
   1  -7  -1 1160.57   40.72
   1  -7  -1 1209.10   40.79
  -1   7   1 1196.46   40.87
  -1   7   1 1152.96   40.71
  -1   7   1 1203.01   40.65
  -1   7   1 1027.03   40.79
   1  -7  -1 1146.89   40.51
   1  -7  -1 1185.51   40.68
   1   6  -7  708.46   25.00
   1   6  -7  716.71   25.08
  -1  -6   7  708.72   25.16
  -1  -6   7  712.41   25.04
  -1  -6   7  685.06   25.09
  -1  -6   7  703.41   24.79
   5   5  -5  907.16   34.28
  -5  -5   5 1034.74   34.33
   5   5  -5 1031.96   34.55
   5   5  -5  991.33   34.49
  -5  -5   5  938.26   34.68
  -5  -5   5  974.10   34.49
  -5  -5   5  995.13   34.45
   5   5  -5  960.23   34.36
   6  -1  -3  107.96    4.47
   6  -1  -3   90.34    4.35
  -6   1   3  102.55    4.04
   6  -1  -3  100.85    4.07
   6  -1  -3   98.03    4.70
   1   2  14  698.10   24.06
  -1  -2 -14  691.39   24.16
  -1  -2 -14  679.37   24.13
  -1  -2 -14  691.66   24.08
   1   2  14  668.15   24.12
   1   2  14  631.85   24.21
   1   5  12   35.15    3.74
   1   5  12   41.79    3.27
  -1  -5 -12   39.49    3.60
  -1  -5 -12   41.88    3.34
  -1  -5 -12   37.05    3.36
  -2   1 -13  469.19   17.27
   2  -1  13  466.36   17.21
   2  -1  13  462.83   17.13
  -2   1 -13  486.27   17.23
   2  -1  13  484.48   17.14
   2  -1  13  461.50   17.09
  -2   1 -13  492.01   17.08
   0  -5   9  881.45   31.88
   0  -5   9  870.37   31.76
   0  -5   9  890.81   31.73
   0  -5   9  926.22   31.61
   0   5  -9  918.16   31.74
  -4  -5   7   15.38    2.95
  -4  -5   7   15.77    3.13
  -4  -5   7   21.59    3.32
  -4  -5   7   13.44    2.67
   4   5  -7   14.57    2.66
  -2   3 -11  417.01   14.63
   2  -3  11  411.65   14.71
   2  -3  11  404.27   14.51
   2  -3  11  389.13   14.62
  -2   3 -11  389.83   14.55
   6   1   8  212.83    8.07
   6   1   8  200.20    8.36
   6   1   8  198.96    8.03
  -6  -1  -8  203.29    7.51
  -6  -1  -8  211.16    7.73
   6   1   8  206.88    7.68
   6   1   8  211.44    7.73
  -4  -5 -11   86.07    4.97
  -4  -5 -11   86.19    4.57
  -4  -5 -11   87.90    4.30
  -4  -5 -11   91.59    3.57
   5   0  10  312.91   11.40
   5   0  10  319.08   11.89
  -5   0 -10  309.49   11.55
   5   0  10  326.08   11.55
   0  -7   3  138.70    6.37
   0   7  -3  146.06    6.11
   0   7  -3  147.95    6.04
   0  -7   3  138.84    6.07
   0  -7   3  148.19    5.98
  -5  -2 -11    3.86    3.44
   5   2  11    8.22    2.04
   5   2  11    6.89    3.43
   5   2  11    7.24    3.03
  -5  -2 -11    7.67    1.87
   5   2  11   10.60    2.70
  -4  -6   5  215.38    8.59
  -4  -6   5  224.03    8.95
  -4  -6   5  221.02    8.76
   4   6  -5  223.32    8.46
   4   6  -5  237.47    8.74
   1  -7  -3    6.06    2.63
  -1   7   3    4.89    2.80
   1  -7  -3    8.66    2.66
  -1   7   3    5.47    2.90
   1  -7  -3    7.00    2.81
  -1   7   3    7.16    2.41
  -2  -7   4   19.31    3.13
  -2  -7   4   31.64    2.93
   2   7  -4   26.50    2.68
   2   7  -4   29.41    3.34
  -2  -7   4   22.45    3.27
  -2  -7   4   27.84    3.13
   2   7  -4   29.71    2.97
   2   7  -4   28.54    3.42
  -4  -2  10  436.35   14.74
   4   2 -10  440.36   15.08
  -4  -2  10  442.54   15.07
  -4  -2  10  451.01   14.92
  -4  -2  10  371.32   14.44
  -4  -2  10  425.53   14.56
   1  -7   0  146.83    6.12
   1  -7   0  144.56    5.61
  -1   7   0  122.31    6.22
  -1   7   0  148.92    6.26
  -1   7   0  145.23    5.95
   1  -7   0  140.21    5.77
   1  -7   0  135.25    6.05
   0  -1 -14   73.16    4.21
   0  -1 -14   87.65    4.33
   0  -1 -14   94.89    4.26
   0   1  14   77.11    4.13
   0   1  14   78.03    3.72
   0  -1 -14   63.47    4.47
   6  -1   5   52.43    3.39
  -6   1  -5   52.44    2.79
  -6   1  -5   56.11    3.32
  -6   0  -7  336.05   11.84
   6   0   7  329.68   12.27
   6   0   7  340.76   12.20
   6   0   7  325.86   11.72
   6   0   7  347.01   12.05
  -6   0  -7  321.45   12.08
  -3   5  -5  437.00   15.35
  -3   5  -5  444.90   15.77
   3  -5   5  429.29   15.77
   3  -5   5  422.94   15.46
  -6  -4  -8  237.68    8.12
  -6  -4  -8  209.88    7.97
  -6  -4  -8  249.47    8.78
   6   4   8  248.51    8.76
   6   4   8  257.13    8.83
  -6  -4  -8  249.53    9.05
  -6  -4  -8  245.42    8.81
   1   7  -4  850.30   29.03
  -1  -7   4  825.70   29.13
  -1  -7   4  775.66   28.99
  -1  -7   4  869.04   29.08
   1   7  -4  828.85   28.87
   1   7  -4  756.41   29.05
  -1  -7   4  827.97   28.91
  -4   3  -8    1.14    2.60
  -4   3  -8    3.50    1.79
  -4   3  -8    3.23    2.68
   4  -3   8    2.49    2.58
   4  -3   8    3.28    1.76
   4  -3   8    4.10    3.33
   2   6  -7  183.02    7.03
  -2  -6   7  179.01    7.32
  -2  -6   7  172.60    7.02
  -2  -6   7  168.04    6.31
   2   6  -7  178.11    7.08
  -2  -6   7  187.97    7.05
  -2  -6   7  175.07    7.23
  -3  -7  -8  337.67   11.43
   3   7   8  327.10   12.01
  -3  -7  -8  339.30   11.92
  -3  -7  -8  339.04   11.92
  -4   1 -11  154.23    6.18
   4  -1  11  155.80    6.47
   4  -1  11  143.33    6.10
  -4   1 -11  151.45    6.89
   4  -1  11  147.14    5.90
  -4   1 -11  148.13    6.08
  -5  -3 -11    2.26    1.68
   5   3  11    1.70    3.31
  -5  -3 -11    6.21    2.92
   5   3  11    3.78    2.95
   5   3  11   -2.35    2.91
   5   3  11    4.39    2.92
  -5  -3 -11    4.87    3.06
  -2   5   9  834.84   28.29
  -2   5   9  789.48   28.50
   2  -5  -9  824.21   28.40
   2  -5  -9  723.68   28.48
   2  -5  -9  818.46   28.26
  -5   3   4    2.67    1.78
  -5   3   4    6.49    2.67
   5  -3  -4    1.21    2.71
   5  -3  -4   -0.60    2.94
   5  -3  -4    4.89    1.31
   4  -3  -8  123.26    5.70
  -4   3   8  123.32    4.83
  -4   3   8  129.39    5.48
  -4   3   8  127.33    4.95
   4  -3  -8  135.45    4.85
  -4   1  10  191.13    7.25
  -4   1  10  170.55    6.54
   4  -1 -10  188.71    6.67
   4  -1 -10  189.58    7.39
   0   3 -12   20.62    3.03
   0  -3  12   21.52    2.52
   0  -3  12   16.90    3.03
   0   3 -12   18.44    2.83
  -3   4  -8   58.54    3.89
   3  -4   8   53.54    3.77
   3  -4   8   58.78    4.16
  -3   4  -8   64.62    3.18
  -3   4  -8   65.63    3.66
   3  -4   8   66.98    3.34
  -2   6   6  244.41    8.67
   2  -6  -6  216.73    8.55
   2  -6  -6  214.45    8.85
   2  -6  -6  237.18    8.62
  -2   6   6  205.17    8.95
   2   5  -9  118.88    5.04
  -2  -5   9  102.38    4.13
  -2  -5   9  118.02    5.21
  -2  -5   9  112.07    5.06
  -2  -5   9  112.75    5.34
  -2  -5   9  107.16    5.22
   2   5  -9  110.21    5.23
   5  -1   9   29.58    3.14
  -5   1  -9   21.70    2.71
   5  -1   9   25.81    1.92
   5  -1   9   24.20    2.74
   5  -1   9   23.09    3.51
   4   4  12  393.30   15.42
  -4  -4 -12  412.12   15.43
   4   4  12  429.64   15.61
   4   4  12  433.15   15.67
  -4  -4 -12  411.62   15.58
  -4  -4 -12  443.85   15.02
  -4  -4 -12  422.06   15.31
  -3   0 -13  197.92    7.59
   3   0  13  186.55    7.64
   3   0  13  202.04    7.68
   3   0  13  188.21    7.89
   3   0  13  189.35    7.87
  -3   0 -13  208.86    7.92
  -3   0 -13  200.58    8.03
  -1   4  12  277.03    9.59
   1  -4 -12  246.21    9.43
  -1   4  12  256.72    9.95
   1  -4 -12  248.54    9.58
   2   2  14  624.21   22.20
   2   2  14  649.08   22.21
  -2  -2 -14  589.49   22.19
  -2  -2 -14  622.63   22.00
   2   2  14  628.11   22.18
  -2  -2 -14  604.14   22.19
   1   7   8  462.08   17.27
   1   7   8  497.12   17.22
   1   7   8  468.94   17.01
  -1  -7  -8  469.64   17.17
  -1  -7  -8  470.98   16.89
  -1  -7  -8  475.45   17.09
   6   5  -2   47.27    2.72
  -6  -5   2   42.99    3.64
   6   5  -2   48.87    3.81
   6   5  -2   40.94    3.79
  -6  -5   2   53.63    3.52
   6   5  -2   44.94    3.49
  -6  -5   2   47.46    3.07
   6   5  -2   43.82    3.01
   6   5  -2   43.54    2.26
   6   5  -2   45.02    2.65
   5   6  -3   38.31    3.64
  -5  -6   3   41.43    3.11
   5   6  -3   45.00    3.18
   5   6  -3   42.76    3.05
   5   6  -3   28.33    3.35
   5   6  -3   40.38    2.72
  -5  -6   3   38.16    3.53
   3  -3  10  434.28   15.77
   3  -3  10  440.01   15.96
  -3   3 -10  440.00   15.58
   3  -3  10  430.94   15.55
  -3   3 -10  431.08   15.73
  -1   0 -14  248.69    9.76
  -1   0 -14  252.13    9.63
   1   0  14  260.66    9.68
   1   0  14  254.55    9.76
  -1   0 -14  264.73    9.87
   1   0  14  249.06    9.78
   2   1  14  120.16    5.36
  -2  -1 -14  122.88    5.17
  -2  -1 -14  115.17    5.58
  -2  -1 -14  114.19    5.56
   2   1  14  113.09    5.42
   2   1  14  116.74    5.26
  -3  -5 -12  350.08   12.86
   3   5  12  350.68   12.85
  -3  -5 -12  343.38   12.93
  -3  -5 -12  347.42   13.13
   6   3  -5    2.38    2.77
   6   3  -5    1.93    2.93
  -6  -3   5   -0.52    2.52
  -6  -3   5    0.90    2.78
  -6  -3   5    1.80    1.58
  -6  -3   5    0.87    3.34
  -4  -7   2   19.58    3.12
   4   7  -2   22.96    3.08
  -4  -7   2   24.04    3.76
  -4  -7   2   20.70    2.47
   4   7  -2   22.30    2.22
   4   7  -2   23.51    2.95
  -4  -7   2   17.42    1.12
  -4  -7  -7  228.08    9.44
  -4  -7  -7  247.25    9.27
   4   7   7  245.40    9.31
  -4  -7  -7  252.85    9.22
  -4  -7  -7  241.67    8.58
  -4   4   6  121.10    4.60
  -4   4   6  113.10    4.89
  -4   4   6  117.05    5.42
   4  -4  -6  108.30    5.24
   4  -4  -6  111.79    4.48
  -1  -3  12   83.56    4.63
   1   3 -12   91.06    4.23
   1   3 -12   97.78    4.72
   2  -6   4  138.02    6.14
   2  -6   4  147.54    5.86
  -2   6  -4  151.27    6.27
  -2   6  -4  145.07    5.83
   2  -6   4  142.76    6.03
   0   0 -14    7.52    2.94
   0   0 -14    1.18    2.70
   0   0  14    2.20    2.99
   0   0 -14    1.20    3.25
   0   0  14   -0.13    2.80
   6   4  -4  241.88    9.04
  -6  -4   4  250.83    9.05
  -6  -4   4  220.02    9.45
  -6  -4   4  257.52    9.47
  -6  -4   4  246.13    9.39
   6   4  -4  260.96    9.45
   6   4  -4  249.95    9.62
   6   4  -4  244.45    8.93
   0   2 -13  105.79    4.90
   0  -2  13  110.34    4.83
   0   2 -13  116.57    5.02
   0  -2  13  109.08    5.09
   0  -2  13  101.87    5.16
   0   2 -13  116.09    5.19
  -6   0   5   18.39    2.45
   6   0  -5   19.31    2.93
   6   0  -5   21.79    2.48
   6   0  -5   18.73    2.35
  -6   0   5   17.70    1.90
   6   0  -5   15.57    2.41
  -1   7   4   31.89    2.76
   1  -7  -4   31.15    2.92
   1  -7  -4   29.44    3.14
   1  -7  -4   31.11    2.91
  -1   7   4   31.03    3.21
  -1   7   4   32.25    3.16
   1  -6   6    3.03    2.64
  -1   6  -6    8.82    3.13
   1  -6   6    6.62    2.48
  -1   6  -6    5.46    2.84
  -1   6  -6    5.95    2.56
   3  -4  -9  442.85   16.62
   3  -4  -9  448.28   16.28
  -3   4   9  499.64   16.31
  -3   4   9  448.16   16.59
   3  -4  -9  432.70   16.63
   0  -2 -14  474.87   17.36
   0   2  14  480.79   17.36
   0  -2 -14  489.62   17.43
  -5  -6  -8  666.38   24.24
  -5  -6  -8  696.35   24.33
  -5  -6  -8  675.45   23.98
   5   6   8  693.00   24.32
  -2   0  13  392.96   14.63
   2   0 -13  403.63   14.43
   1  -7   1  393.55   14.55
   1  -7   1  412.85   14.75
  -1   7  -1  406.00   14.63
  -1   7  -1  388.70   14.59
   1  -7   1  407.98   14.44
   1  -7   1  429.33   14.73
  -1   7  -1  371.32   14.76
  -1   7  -1  409.79   14.83
   0   6  -7  185.77    7.21
   0   6  -7  171.98    7.17
   0  -6   7  172.74    7.04
   0  -6   7  185.46    7.28
   0  -6   7  188.35    7.32
   4   0  12  460.29   16.60
   4   0  12  448.39   16.92
  -4   0 -12  452.55   17.04
  -4   0 -12  477.17   16.63
   4   0  12  473.24   16.67
   0  -6 -10  987.97   34.66
   0   6  10 1022.61   34.53
   0   6  10  986.39   34.74
   0  -6 -10  968.25   34.86
   0  -6 -10  946.93   34.72
   6   5   7  119.45    5.37
  -6  -5  -7  118.62    5.43
  -6  -5  -7  123.70    5.33
  -6  -5  -7  122.94    5.27
   6   5   7  125.68    5.29
  -6  -5  -7  108.61    4.47
   7   2   2    6.21    3.27
   7   2   2    7.52    2.08
   7   2   2   17.27    2.05
   7   2   2    9.76    2.15
   7   2   2    6.02    3.18
   7   2   2    9.24    2.07
   0   7   7  440.21   15.81
   0   7   7  449.87   16.16
   0  -7  -7  428.34   16.18
   0  -7  -7  451.65   15.99
   0  -7  -7  457.25   16.14
  -1   3  13   22.11    2.63
  -1   3  13   22.86    3.25
   1  -3 -13   20.72    2.54
  -3   0  12  141.37    5.60
  -3   0  12  146.44    5.70
   3   0 -12  146.00    6.28
  -3   0  12  143.77    6.27
   4  -2  10   40.08    2.56
   4  -2  10   39.88    3.26
   4  -2  10   40.62    3.82
  -4   2 -10   39.16    2.80
  -4   2 -10   41.10    3.20
   7   2   1   15.26    2.24
   7   2   1   19.15    3.70
   7   2   1   16.53    2.29
   7   2   1   28.46    3.42
   7   2   1   16.50    2.04
   7   2   1   24.39    3.68
   7   2   1   25.54    2.19
  -2  -6 -11   72.64    4.65
   2   6  11   74.44    4.08
  -2  -6 -11   84.18    4.37
  -2  -6 -11   74.11    4.29
  -2  -6 -11   77.47    4.42
  -2  -6 -11   81.29    3.62
   2  -3 -12  274.20    9.93
  -2   3  12  284.88   10.19
  -2   3  12  275.72   10.55
   2  -1 -13   89.56    4.16
  -2   1  13   91.86    4.38
   2  -1 -13   98.69    4.80
  -2   1  13   76.38    4.15
   5   1  11  508.53   18.29
   5   1  11  489.58   18.35
   5   1  11  514.72   18.56
   5   1  11  499.60   18.57
  -5  -1 -11  550.29   18.28
  -3  -4 -13  333.01   12.14
   3   4  13  311.89   12.36
   3   4  13  333.55   12.37
  -3  -4 -13  321.73   11.82
   3   4  13  339.10   12.26
   7   3   2    7.92    2.94
   7   3   2    6.06    2.43
  -7  -3  -2    4.60    2.05
   7   3   2    5.22    3.44
   7   3   2    6.25    2.14
   7   3   2    7.06    1.82
   7   3   2   10.21    2.27
   7   2   3 1079.09   38.44
   7   2   3 1104.00   38.42
   7   2   3 1129.81   38.40
   7   2   3 1093.23   38.79
   7   2   3 1082.61   38.39
   7   2   3 1112.76   38.96
  -6  -3  -9   10.29    1.61
  -6  -3  -9   11.45    1.51
  -6  -3  -9   13.93    3.29
   6   3   9   11.08    2.73
   6   3   9   11.76    1.52
   6   3   9    8.44    2.85
  -6  -3  -9   10.88    2.89
  -5   3  -5  326.56   11.96
  -5   3  -5  334.72   11.83
   5  -3   5  310.63   12.34
   5  -3   5  315.28   11.89
   6   2   9  205.85    8.57
   6   2   9  206.03    8.29
   6   2   9  218.28    7.81
  -6  -2  -9  207.41    8.73
  -6  -2  -9  214.06    7.81
   6   2   9  211.11    8.12
   1   4 -11  389.36   14.35
  -1  -4  11  398.24   14.00
   1   4 -11  395.84   14.15
  -1  -4  11  392.11   14.38
  -1  -4  11  381.99   14.36
   5   7   3   31.97    3.70
  -5  -7  -3   35.04    3.26
   5   7   3   24.53    1.53
   5   7   3   27.52    3.57
  -5  -7  -3   30.68    2.76
   5   7   3   28.04    2.73
   5   7   3   23.63    3.25
  -5  -7  -3   28.50    3.67
  -5  -7  -3   26.98    2.55
   5   7   3   32.54    3.11
  -5  -4   7    8.72    3.03
  -5  -4   7    6.03    3.46
  -5  -4   7    8.26    2.25
   5   4  -7    6.41    2.74
   5   4  -7   10.04    2.98
   5   4  -7    6.20    3.05
  -5  -4   7    9.14    2.89
  -5  -4   7    6.68    2.45
   7   3   3   17.39    1.92
   7   3   3   16.01    2.37
   7   3   3   20.51    3.12
   7   3   3   19.05    3.40
   7   3   3   17.78    2.55
   7   3   3   18.14    2.48
   0   4 -11  125.05    5.46
   0  -4  11  120.13    5.08
   0  -4  11  122.74    5.43
   2  -4 -11   31.96    2.72
  -2   4  11   35.95    3.69
  -2   4  11   40.48    2.76
  -1  -3 -14    9.04    2.86
  -1  -3 -14    5.91    2.75
   1   3  14    3.17    2.95
   5   7   2   30.02    3.02
  -5  -7  -2   33.96    3.34
   5   7   2   31.66    1.77
   5   7   2   26.32    3.43
   5   7   2   24.34    3.11
   5   7   2   29.85    3.13
   5   7   2   30.05    2.75
  -5  -7  -2   28.44    2.41
  -7  -3  -1 1151.38   41.45
   7   3   1 1243.02   41.57
   7   3   1 1200.76   41.53
   7   3   1 1174.52   41.94
   7   3   1 1171.01   41.45
   7   3   1 1194.16   41.90
   7   3   1 1182.01   41.43
   7   3   1 1210.45   41.72
   0  -4 -13   67.63    4.17
   0   4  13   61.57    4.31
   0  -4 -13   65.91    3.89
   0  -4 -13   66.28    3.64
   0   4  13   70.56    3.83
   6  -1  -4   84.74    3.57
   6  -1  -4   93.52    3.91
  -6   1   4   88.11    3.60
   6  -1  -4   80.45    3.89
   6  -1  -4   81.45    4.18
  -6   1   4   69.61    3.03
  -4  -6 -10  148.87    6.34
  -4  -6 -10  146.07    6.80
  -4  -6 -10  150.10    6.18
  -4  -6 -10  148.89    5.42
  -5  -5 -10   68.42    3.81
   5   5  10   70.42    3.80
  -5  -5 -10   67.80    3.83
   5   5  10   66.65    3.86
  -5  -5 -10   67.35    3.17
  -5  -5 -10   72.44    4.02
  -5  -5 -10   51.54    2.17
   1  -2  13   32.68    3.26
   1  -2  13   32.43    3.05
   1  -2  13   31.69    3.26
  -1   2 -13   31.24    3.25
   1  -2  13   38.45    3.23
  -1   2 -13   37.15    2.98
  -1   2 -13   38.04    3.34
   6  -2   1  323.73   11.15
  -6   2  -1  290.49   11.15
   6  -2   1  312.83   11.33
  -6   2  -1  294.29   11.36
   1  -3  12  632.41   23.48
  -1   3 -12  680.15   23.54
  -1   3 -12  680.79   23.53
  -1   3 -12  675.24   23.65
   1  -3  12  665.53   23.52
   1  -3  12  637.57   23.57
   6   6   3   33.63    2.37
   6   6   3   33.89    3.17
   6   6   3   30.53    2.98
   6   6   3   30.41    3.20
   6   6   3   25.34    1.12
   6   6   3   27.30    4.05
  -6  -6  -3   30.40    3.14
  -6  -6  -3   27.76    2.70
  -6  -6  -3   32.35    3.87
   6   6   3   32.46    2.08
   6  -2   0    5.74    2.29
   6  -2   0    6.04    1.79
   6  -2   0    5.77    2.75
  -6   2   0    6.20    2.83
  -6   2   0    3.34    2.29
  -6  -6  -2   67.87    3.92
   6   6   2   67.98    3.25
   6   6   2   81.77    4.03
  -6  -6  -2   70.71    3.56
   6   6   2   67.10    2.76
   6   6   2   82.12    4.19
  -6  -6  -2   77.25    4.84
   6   6   2   74.11    3.33
   6   6   2   76.94    4.18
  -3  -1  12  624.54   21.47
  -3  -1  12  608.06   21.25
   3   1 -12  570.18   21.49
   3   1 -12  593.59   21.21
  -5  -3   8  411.84   13.88
   5   3  -8  403.68   14.24
  -5  -3   8  389.73   13.81
  -5  -3   8  400.49   14.44
  -5  -3   8  391.84   14.21
  -5  -3   8  371.86   13.57
   7   2   0   23.44    3.45
   7   2   0   18.40    2.22
   7   2   0   19.45    3.34
   7   2   0   17.51    3.22
   7   2   0   12.89    2.36
   7   2   0   17.71    1.68
   3   7  -4  516.28   17.45
  -3  -7   4  433.17   16.82
   3   7  -4  510.13   17.55
  -3  -7   4  526.36   17.31
   3   7  -4  523.16   17.24
  -3  -7   4  508.71   17.66
  -3  -7   4  518.91   17.50
   3   7  -4  512.17   17.58
  -5  -7  -4  215.74    8.61
  -5  -7  -4  247.87    9.39
   5   7   4  272.22    9.03
  -5  -7  -4  258.48    9.00
   5   7   4  262.03    9.15
   5   7   4  244.62    9.38
   5   7   4  213.85    8.05
   5   7   4  226.18    8.69
   5   7   4  254.65    9.08
  -5  -7  -4  242.55    8.62
   5  -1  -8  472.68   17.95
  -5   1   8  534.53   18.32
   5  -1  -8  550.69   18.48
   5  -1  -8  522.54   18.04
   5  -1  -8  538.53   18.47
  -5   1   8  554.64   18.42
   3  -5  -7    4.42    2.16
   3  -5  -7    4.59    2.92
  -3   5   7   13.91    3.10
  -3   5   7   11.71    2.76
   3  -5  -7    4.68    2.82
  -3   5   7    9.90    2.25
   2   3  14  889.67   30.65
  -2  -3 -14  879.80   30.45
   2   3  14  867.40   30.65
  -2  -3 -14  838.28   30.66
   2   3  14  866.74   30.73
  -2  -3 -14  842.01   30.63
   1   2 -13   57.00    3.32
  -1  -2  13   54.77    3.75
  -1  -2  13   56.20    3.49
   1   2 -13   44.78    3.60
   3   4 -10   27.18    1.85
  -3  -4  10   27.67    3.42
   3   4 -10   34.99    2.99
  -3  -4  10   36.90    3.06
   5   4  11  271.81   11.06
  -5  -4 -11  283.25   11.32
  -5  -4 -11  294.92   11.05
  -5  -4 -11  295.07   10.81
  -5  -4 -11  299.50   10.47
   5   4  11  301.74   11.47
   5   4  11  306.18   11.13
   1  -5 -11  157.20    6.34
  -1   5  11  151.31    6.72
   1  -5 -11  152.36    6.30
  -1   5  11  153.00    5.58
  -1   5  11  149.50    6.23
   4  -4   6    6.77    3.40
  -4   4  -6    3.87    1.48
  -4   4  -6    8.03    2.84
   4  -4   6    8.66    2.77
  -4   4  -6   10.88    2.88
   3   3 -11   76.88    4.30
   3   3 -11   79.26    3.47
  -3  -3  11   76.07    4.23
  -3  -3  11   83.82    3.77
  -5  -7  -1  165.09    6.19
   5   7   1  169.35    6.84
   5   7   1  153.75    6.91
  -5  -7  -1  159.97    6.76
   5   7   1  163.33    6.02
   5   7   1  158.35    6.85
   5   7   1  170.48    7.14
   5   7   1  163.09    6.46
  -3   1  12  425.70   15.06
  -3   1  12  416.77   15.20
   3  -1 -12  442.97   15.22
   3  -1 -12  422.67   15.62
  -3   1  12  425.26   15.54
   6  -2   2   11.86    2.31
  -6   2  -2    9.54    2.30
   6  -2   2    8.34    2.64
  -6   2  -2    8.65    2.86
   6  -1   6  429.66   15.37
  -6   1  -6  439.24   15.43
  -6   1  -6  419.45   15.19
  -6  -6  -4   14.99    2.89
  -6  -6  -4   18.90    3.62
   6   6   4   14.79    3.14
   6   6   4   13.51    3.38
   6   6   4   15.38    1.89
   6   6   4   14.96    3.00
   6   6   4   12.31    2.44
  -6  -6  -4   14.08    2.63
   7   2   4  390.29   15.37
   7   2   4  405.71   14.91
   7   2   4  436.05   14.76
   7   2   4  412.18   14.73
   7   2   4  408.06   15.26
  -1   7   5   64.50    3.83
   1  -7  -5   65.04    3.58
  -1   7   5   64.48    3.96
  -1   7   5   66.14    3.80
   1  -7  -5   66.25    3.87
   1  -7  -5   59.89    3.67
  -1  -6 -11  167.66    6.87
   1   6  11  159.75    6.73
  -1  -6 -11  149.95    6.83
  -1  -6 -11  164.76    6.99
  -1  -6 -11  173.14    6.52
   7   3   4   28.39    2.04
   7   3   4   24.28    2.78
   7   3   4    9.76    3.29
   7   3   4   31.06    2.84
   7   3   4    8.67    3.54
   7   3   4   32.24    2.57
  -1   6   9  124.23    5.21
   1  -6  -9  112.92    5.11
   1  -6  -9  111.02    5.11
  -2  -1  13   36.81    2.98
   2   1 -13   42.13    3.05
   0   5  12  556.90   19.24
   0  -5 -12  523.15   19.23
   0  -5 -12  545.63   19.29
   0   5  12  511.25   19.50
   0  -5 -12  543.80   19.49
   2   7   9   55.57    3.88
   2   7   9   45.87    3.56
   2   7   9   59.39    3.60
  -2  -7  -9   51.56    2.92
  -2  -7  -9   55.92    3.87
  -2  -7  -9   51.00    3.76
  -2  -8  -2  199.22    8.21
   2   8   2  205.80    8.13
   2   8   2  217.60    8.34
  -2  -8  -2  217.63    7.80
   2   8   2  195.78    7.84
   2   8   2  198.22    8.23
   5  -2  -7   36.48    3.24
   5  -2  -7   32.92    3.26
  -5   2   7   31.41    2.80
   5  -2  -7   28.44    1.51
   5  -2  -7   42.25    3.03
   0   7  -4  381.30   13.91
   0  -7   4  388.70   13.95
   0  -7   4  376.58   14.16
   0   7  -4  385.35   14.01
   0  -7   4  377.23   13.96
   6   1  -6   86.04    3.98
   6   1  -6   75.62    4.08
  -6  -1   6   81.02    4.08
   6   1  -6   87.96    3.72
  -6  -1   6   81.04    3.83
  -2  -8  -3   31.30    2.53
   2   8   3   33.48    3.53
   2   8   3   36.28    3.55
   2   8   3   31.73    3.35
   2   8   3   28.33    3.47
  -2  -8  -3   29.81    3.56
   2   8   3   32.93    3.63
   2   8   3   32.54    2.77
  -6   2   1   78.65    3.28
   6  -2  -1  101.07    4.46
   6  -2  -1  109.75    4.26
  -6   2   1   93.31    4.22
   6  -2  -1  102.83    4.16
   6  -2  -1   99.76    3.64
  -7  -3   0  300.73    9.52
   7   3   0  295.01    9.94
   7   3   0  315.82   10.34
   7   3   0  327.27    9.61
   7   3   0  340.41    9.83
   7   3   0  304.76    9.50
   7   3   0  295.02   10.13
   6   6   1  176.64    7.03
  -6  -6  -1  190.06    8.03
  -6  -6  -1  190.76    7.44
   6   6   1  177.75    7.61
   6   6   1  189.33    6.80
   6   6   1  186.43    6.95
   6   6   1  198.09    7.43
   6   6   1  190.26    7.53
  -6  -6  -1  198.96    7.18
   6   6   1  175.43    7.87
  -3  -6 -11  135.78    5.87
  -3  -6 -11  129.18    5.73
  -3  -6 -11  123.05    6.16
   3   6  11  123.11    5.81
  -3  -6 -11  134.58    5.08
   1  -7   2   13.89    2.95
  -1   7  -2    8.75    3.30
   1  -7   2    9.00    2.68
  -1   7  -2   14.48    2.76
   1  -7   2   13.50    2.66
  -1   7  -2   11.74    2.76
   1  -7   2   12.00    3.04
   5  -3  -5  115.76    5.39
  -5   3   5  123.40    4.87
   5  -3  -5  127.64    5.33
   5  -3  -5  119.01    4.46
   6   2  -6   10.02    2.59
  -6  -2   6   12.21    3.46
  -6  -2   6    9.93    2.80
   6   2  -6   12.03    2.78
  -6  -2   6    9.58    0.98
  -6  -2   6   13.99    2.51
   7   1   2   24.22    2.36
   7   1   2   35.97    2.02
   7   1   2   34.09    2.09
   7   1   2   26.26    2.34
   7   1   2   33.82    3.70
   7   1   2   29.17    2.69
  -2   0 -14  303.84   11.21
   2   0  14  302.01   11.28
   2   0  14  297.97   11.28
  -2   0 -14  298.31   11.46
  -2   0 -14  298.97   11.41
   2   0  14  301.06   11.23
   7   1   1  187.76    6.66
   7   1   1  166.17    6.30
   7   1   1  154.13    6.01
   7   1   1  189.68    6.29
   7   1   1  179.60    7.23
   7   1   1  175.73    6.31
   4  -5   0   96.37    4.49
  -4   5   0   98.81    4.88
   4  -5   0   96.28    4.85
  -4   5   1   50.34    3.66
   4  -5  -1   47.37    3.10
   4  -5  -1   47.93    3.57
   1  -5   9  130.75    5.85
   1  -5   9  144.10    5.82
  -1   5  -9  131.14    5.75
   4   2  13   30.08    3.31
   4   2  13   30.45    3.82
  -4  -2 -13   23.03    2.40
   5  -2   8  390.80   14.85
  -5   2  -8  397.49   14.42
   5  -2   8  398.68   14.06
  -5   2  -8  398.31   14.50
   5  -2   8  411.10   14.52
  -2  -8  -1  130.75    5.76
   2   8   1  134.68    5.86
  -2  -8  -1  116.98    5.91
   2   8   1  117.65    5.27
   2   8   1  140.97    5.87
  -2  -8  -1  130.32    5.27
   2  -4  10 1012.00   36.27
  -2   4 -10 1035.74   36.19
   2  -4  10 1068.46   36.12
  -2   4 -10  996.32   36.09
  -5  -7  -5  548.63   19.48
  -5  -7  -5  492.16   19.96
   5   7   5  558.91   19.70
   5   7   5  550.22   19.88
  -5  -7  -5  553.85   19.41
   5   7   5  498.70   19.45
  -5  -7  -5  580.02   19.68
   5   7   5  588.92   19.71
  -4  -4   9  101.48    4.86
  -4  -4   9   90.88    4.78
  -4  -4   9  102.50    5.20
   4   4  -9   86.84    3.41
   4   4  -9   93.16    4.69
  -4  -4   9   91.82    4.28
   4   4  -9   99.98    4.50
   1  -1 -14  181.88    7.37
  -1   1  14  184.68    7.22
   1  -1 -14  182.56    7.27
  -2   6   7  170.79    6.57
   2  -6  -7  163.91    6.58
   2  -6  -7  162.02    6.79
  -2   6   7  148.91    7.00
   2  -6  -7  163.94    6.65
   6   5  -3  243.17    9.23
   6   5  -3  226.77    8.26
   6   5  -3  240.30    9.21
  -6  -5   3  230.57    8.67
   6   5  -3  219.85    8.71
   6   5  -3  235.00    8.63
  -6  -5   3  235.61    9.14
   6   5  -3  232.65    9.01
  -6  -5   3  247.19    9.06
  -3  -6   7   97.17    5.03
   3   6  -7   88.04    4.39
  -3  -6   7   86.72    4.59
   3   6  -7   83.39    4.79
  -3  -6   7   88.40    4.86
  -3  -6   7   93.95    4.52
   2   8   4   85.81    3.95
   2   8   4   82.93    4.65
  -2  -8  -4   84.46    4.49
   2   8   4   81.47    4.43
   2   8   4   80.65    4.55
  -2  -8  -4   82.08    3.85
   2   8   4   78.90    4.66
   2   8   4   91.40    4.60
   7   1   3 1499.71   50.91
   7   1   3 1411.66   50.93
   7   1   3 1428.93   50.89
   7   1   3 1383.93   50.78
   7   1   3 1483.99   51.32
   7   1   3 1541.17   50.75
   7   2  -1  175.24    7.03
   7   2  -1  195.70    7.11
   7   2  -1  204.35    8.01
   7   2  -1  209.56    8.10
   7   2  -1  207.09    7.96
   7   2  -1  208.75    7.49
   7   2  -1  226.48    7.47
   4  -5   1   39.55    3.10
  -4   5  -1   42.28    3.57
   4  -5   1   36.71    3.57
  -4   5  -1   45.15    2.23
  -3   5  -6  132.15    6.19
  -3   5  -6  151.04    5.82
   3  -5   6  157.24    6.79
   3  -5   6  158.96    6.54
  -3   5  -6  160.63    6.49
  -4   5   2   20.84    2.34
   4  -5  -2   22.89    2.41
   4  -5  -2   21.73    3.13
  -4   5   2   18.79    3.29
   7   1   0   70.09    3.03
   7   1   0   84.59    3.40
   7   1   0   74.69    4.44
   7   1   0   75.80    4.42
   7   1   0   80.37    3.82
   7   1   0   78.94    3.17
   7   1   0   86.16    4.52
  -6   2  -3  461.98   16.65
  -6   2  -3  450.48   16.88
   6  -2   3  491.00   16.85
   2   7  -5 1020.08   36.04
  -2  -7   5 1043.72   36.07
  -2  -7   5 1031.78   35.64
  -2  -7   5 1027.65   36.15
   2   7  -5 1013.71   35.86
   2   7  -5 1041.68   36.06
  -2  -7   5 1013.59   35.90
  -2  -7   5  975.03   35.98
   6   0   8  298.28   10.79
   6   0   8  289.07   10.50
   6   0   8  298.13   11.08
  -6   0  -8  300.40   10.64
  -6   0  -8  293.94   10.84
   3   7   9   66.23    4.21
  -3  -7  -9   84.75    4.20
   3   7   9   59.29    4.01
  -3  -7  -9   72.91    4.13
  -3  -7  -9   75.22    3.19
  -3  -7  -9   69.25    4.71
  -4  -7   3  471.38   16.47
  -4  -7   3  441.58   16.70
  -4  -7   3  449.21   16.23
   4   7  -3  447.87   16.41
   4   7  -3  462.94   16.55
   4   7  -3  448.43   16.19
   6   6   5   92.91    4.21
   6   6   5   94.85    4.64
  -6  -6  -5   90.94    3.82
  -6  -6  -5   87.90    4.53
  -6  -6  -5   81.72    5.48
   6   6   5   90.09    3.86
  -6  -6  -5   93.37    4.62
   6   6   5   97.27    4.70
   6   4   9  139.11    5.90
  -6  -4  -9  151.55    5.91
  -6  -4  -9  141.58    6.18
  -6  -4  -9  152.59    5.87
  -6  -4  -9  124.00    4.79
  -6  -4  -9  137.66    5.09
   6   4   9  144.82    5.91
   3  -6  -1   28.26    1.58
   3  -6  -1   31.73    2.88
  -3   6   1   35.35    3.47
   3  -6  -1   30.75    3.15
   3  -6  -1   38.57    3.45
  -4  -7  -8  352.57   12.39
  -4  -7  -8  364.34   12.95
  -4  -7  -8  309.23   13.07
  -4  -7  -8  376.29   13.03
   4   7   8  349.82   12.95
  -4  -7  -8  371.36   13.54
   1   0 -14   26.06    3.16
   1   0 -14   21.36    2.85
  -1   0  14   19.21    2.06
  -2   5  -8   56.69    3.41
  -2   5  -8   59.58    3.97
   2  -5   8   55.86    4.01
   2  -5   8   58.88    3.93
   2  -5   8   65.71    3.50
   1   7  -5  963.01   32.04
   1   7  -5  835.28   32.04
  -1  -7   5  848.36   32.03
  -1  -7   5  955.49   31.94
  -1  -7   5  900.13   32.00
   1   7  -5  922.03   31.92
  -5  -1   9  143.19    5.88
  -5  -1   9  137.56    5.64
   5   1  -9  140.24    5.60
  -5  -1   9  118.90    4.69
   5   5  -6   54.39    3.66
   5   5  -6   49.43    3.91
   5   5  -6   44.32    3.19
  -5  -5   6   37.56    3.11
  -5  -5   6   50.59    3.80
  -5  -5   6   41.09    4.22
  -5  -5   6   49.44    3.57
   3   8   3  330.66   12.15
   3   8   3  321.81   12.11
  -3  -8  -3  320.28   12.06
   3   8   3  318.59   11.63
  -3  -8  -3  332.22   11.66
   3   8   3  322.28   12.12
   3   8   3  312.21   12.13
   3   8   2   20.34    3.39
  -3  -8  -2   10.92    2.99
   3   8   2   12.26    3.15
  -3  -8  -2   18.13    3.20
  -3  -8  -2   26.01    2.33
   3   8   2   14.72    3.21
   3   8   2   15.37    2.18
   3   8   2   15.90    3.54
  -6  -1  -9  389.67   13.47
   6   1   9  366.78   13.71
   6   1   9  386.39   13.46
   6   1   9  368.29   13.44
   6   1   9  371.02   13.76
  -6  -1  -9  345.76   14.17
   5   7   0    2.01    1.75
  -5  -7   0    2.75    2.84
   5   7   0    0.49    3.25
   5   7   0    3.17    2.98
   5   7   0   -0.88    3.60
   5   7   0    4.31    2.52
   5   7   0    1.89    3.03
  -5  -7   0   -0.12    1.65
   4   3  13    5.33    3.40
  -4  -3 -13    6.30    2.06
   4   3  13    2.60    3.53
  -4  -3  10  151.38    6.33
  -4  -3  10  146.05    5.85
   4   3 -10  136.17    6.14
  -4  -3  10  140.71    6.21
  -4  -3  10  145.21    5.52
   4   3 -10  143.51    5.40
   4   3 -10  139.73    6.18
   0  -1  14  225.72    9.02
   0   1 -14  234.70    8.96
   0   1 -14  239.95    9.11
   0  -1  14  231.84    8.92
   0   1 -14  225.80    8.92
   7   4   2  130.03    5.55
  -7  -4  -2  130.16    5.13
   7   4   2  138.93    6.13
   7   4   2  127.67    5.54
  -7  -4  -2  129.69    5.39
   7   4   2  136.29    6.10
   7   4   2  127.85    5.55
   7   4   2  135.94    4.95
   7   4   2  110.98    5.37
   3  -6   0   14.06    2.99
   3  -6   0   27.47    3.38
   3  -6   0   23.76    3.00
  -3   6   0   22.58    3.38
   2  -2 -13  659.87   23.59
  -2   2  13  664.09   23.46
  -2   2  13  630.13   23.19
   2  -2 -13  677.46   23.24
   0  -3 -14  343.86   13.02
   0   3  14  366.85   13.01
   0  -3 -14  349.46   13.14
   5   6  -4  223.41    8.49
   5   6  -4  211.79    8.33
   5   6  -4  215.23    8.64
   5   6  -4  205.66    8.16
   5   6  -4  217.69    8.69
  -5  -6   4  222.05    8.58
  -5  -6   4  225.90    8.40
  -3   6   2  559.02   19.60
  -3   6   2  559.22   19.26
   3  -6  -2  567.67   19.51
   3  -6  -2  521.71   19.59
  -3   6   2  505.01   19.63
   3  -6  -2  555.08   19.68
  -3   6   2  538.75   19.73
   6   6   0  524.39   19.48
   6   6   0  534.40   18.96
   6   6   0  534.74   18.98
   6   6   0  545.19   19.30
   6   6   0  537.94   19.10
  -6  -6   0  558.58   19.34
  -6  -6   0  546.13   19.71
   6   6   0  534.25   19.41
   6   6   0  572.76   19.66
  -6   2   2  665.19   23.86
   6  -2  -2  740.40   24.35
   6  -2  -2  707.69   24.13
   6  -2  -2  666.49   23.86
  -6   2   2  674.12   24.19
   6  -2  -2  725.42   24.16
   7   4   3   -1.36    3.59
  -7  -4  -3    0.41    2.12
   7   4   3    3.58    1.51
   7   4   3    3.18    2.54
  -7  -4  -3    1.65    2.54
   7   4   3    2.87    2.69
   7   4   3    2.60    2.81
   7   4   3    6.05    2.58
   7   3   5  287.36   10.32
   7   3   5  281.03    9.93
   7   3   5  247.68   10.89
   7   3   5  275.27   10.63
   3   2  14   97.32    5.24
   3   2  14  120.30    5.42
  -3  -2 -14  112.55    4.82
   3   2  14  112.57    5.34
   3   2  14  113.43    5.27
  -3  -2 -14  102.69    5.55
  -2  -3  12  158.51    6.36
   2   3 -12  159.58    6.05
   2   3 -12  141.47    6.46
   2  -6   5   93.43    4.37
  -2   6  -5   99.71    4.29
   2  -6   5   92.27    4.75
  -2   6  -5   92.61    4.89
   2  -6   5   86.78    4.53
   7   2   5  281.51   11.26
  -7  -2  -5  291.11   10.52
   7   2   5  282.29   11.11
   7   2   5  301.02   10.46
   7   2   5  286.86   10.72
   7   2   5  284.18   10.45
   6   5   8   81.34    4.31
   6   5   8   78.87    4.28
  -6  -5  -8   77.39    4.25
  -6  -5  -8   77.13    3.32
  -6  -5  -8   76.84    4.56
  -6  -5  -8   74.81    4.37
   1   8   2   75.22    4.30
  -1  -8  -2   72.53    4.47
  -1  -8  -2   73.83    4.44
   1   8   2   77.51    3.97
   1   8   2   73.41    4.45
   1   8   2   72.23    4.51
  -1  -8  -2   84.35    3.81
  -1  -8  -2   78.75    4.53
  -2  -4  11  312.09   11.79
  -2  -4  11  331.48   11.86
   2   4 -11  308.04   11.75
   2   4 -11  309.84   11.29
   2   4 -11  336.44   11.72
  -2  -4  11  285.79   11.75
  -4  -6   6  427.77   15.50
  -4  -6   6  419.58   15.61
   4   6  -6  435.24   15.38
  -4  -6   6  420.72   15.73
   7   3  -1   29.21    2.16
   7   3  -1   24.68    3.36
   7   3  -1   28.45    1.65
  -7  -3   1   32.92    2.26
   7   3  -1   30.05    3.03
   7   3  -1   35.48    2.98
   7   3  -1   32.45    3.88
   7   3  -1   31.68    2.64
  -2  -8   0  752.01   25.78
   2   8   0  712.64   26.01
  -2  -8   0  726.62   26.03
  -2  -8   0  725.58   26.10
  -2  -8   0  733.71   26.01
   2   8   0  732.64   25.97
   2   8   0  731.70   25.75
   2   8   0  714.55   26.01
   3   8   4   27.72    3.53
   3   8   4   31.36    3.51
   3   8   4   26.95    3.45
  -3  -8  -4   28.69    3.32
   3   8   4   26.37    2.22
   3   8   4   29.66    3.63
  -3  -8  -4   31.10    2.34
  -1   1 -14  278.45   10.31
   1  -1  14  271.44   10.37
   1  -1  14  284.41   10.29
  -1   1 -14  273.81   10.50
  -1   1 -14  263.56   10.42
   1  -1  14  264.06   10.46
  -1  -7  -9   89.99    4.10
   1   7   9   85.45    4.86
   1   7   9   98.49    4.46
  -1  -7  -9   93.59    4.89
  -1  -7  -9   87.05    4.66
   1   7   9   89.60    4.73
   4  -2 -10   25.90    3.37
  -4   2  10   26.91    2.99
  -4   2  10   28.38    1.80
   4  -2 -10   29.49    3.31
  -4   2  10   27.90    2.69
   1   8   3   21.15    3.17
   1   8   3   15.99    3.53
   1   8   3   14.16    2.71
  -1  -8  -3   14.77    2.46
  -1  -8  -3   14.46    3.26
  -1  -8  -3   15.44    3.12
   1   8   3   17.49    3.11
   3   8   1   15.01    3.32
   3   8   1   24.88    3.35
  -3  -8  -1   20.05    2.50
  -3  -8  -1   10.01    3.19
   3   8   1   13.83    3.19
   3   8   1   21.62    2.33
  -3  -8  -1   16.20    3.12
   3   8   1   14.56    3.11
   7   4   1   70.06    4.60
  -7  -4  -1   79.27    3.35
   7   4   1   69.02    3.85
   7   4   1   72.33    3.25
   7   4   1   70.97    3.62
   7   4   1   72.12    3.85
  -7  -4  -1   72.02    3.63
   7   4   1   65.95    3.90
  -1   4 -11  666.89   26.44
  -1   4 -11  781.28   26.47
   1  -4  11  764.88   26.46
   1  -4  11  776.89   26.47
  -3  -5   9  424.93   15.34
  -3  -5   9  416.04   15.48
   3   5  -9  423.98   15.34
  -4   4   7  414.93   15.06
   4  -4  -7  407.35   14.78
   4  -4  -7  419.36   15.25
  -4   4   7  428.88   14.81
  -5  -6  -9  464.97   16.10
  -5  -6  -9  448.58   16.46
   5   6   9  463.95   16.41
  -5  -6  -9  405.87   16.82
  -5  -6  -9  442.20   16.37
   4   1  13  255.31    9.98
  -4  -1 -13  275.23    9.87
   4   1  13  271.29   10.22
  -4  -1 -13  243.44   10.47
   4   1  13  274.13    9.96
  -3   3  11  170.92    6.45
   3  -3 -11  169.23    7.18
  -3   3  11  167.66    7.03
   4   0 -11   13.27    2.85
  -4   0  11   13.30    1.78
  -4   0  11   11.71    3.12
   4   1 -11  409.51   15.07
  -4  -1  11  415.83   14.82
  -4  -1  11  411.00   15.09
   0   7   8  452.73   15.33
   0   7   8  417.06   15.06
   0  -7  -8  410.43   15.43
   0  -7  -8  415.09   15.14
   0   7   8  413.50   14.95
   0  -7  -8  416.63   15.28
   1   8   1  598.83   22.36
  -1  -8  -1  591.74   22.33
   1   8   1  620.83   22.36
  -1  -8  -1  633.02   22.06
  -1  -8  -1  609.42   22.37
  -1  -8  -1  649.42   22.41
   1   8   1  645.99   22.25
   1   8   1  622.99   22.10
   7   1   4    0.05    1.52
   7   1   4    4.86    3.35
   7   1   4    3.88    2.39
   7   1   4    2.71    2.21
   7   1   4    4.80    2.32
  -7  -1  -4    6.44    2.42
   1   6  -8   98.26    4.72
  -1  -6   8   95.93    4.90
   1   6  -8   96.40    4.88
  -1  -6   8   86.40    5.00
  -1  -6   8   97.99    4.13
  -1  -6   8   98.77    4.78
  -5   0   9   13.42    0.84
  -5   0   9   18.75    2.91
  -5   0   9   19.99    3.01
  -5   0   9   13.73    0.83
   5   0  -9   18.32    2.97
   2   8   5  406.22   14.63
   2   8   5  419.33   14.77
   2   8   5  403.16   14.82
   2   8   5  399.35   14.39
   2   8   5  419.61   14.75
   2   8   5  396.67   14.76
  -2  -8  -5  340.58   14.72
  -2  -8  -5  406.58   14.35
  -2  -8  -5  415.44   14.75
  -4   5  -2   13.72    3.18
   4  -5   2   17.10    3.19
  -4   5  -2    9.09    1.60
   4  -5   2   11.04    2.71
  -4   5  -2   11.16    2.96
  -6  -4   5   10.83    2.80
  -6  -4   5   11.39    3.01
  -6  -4   5   14.11    2.15
  -6  -4   5   14.92    3.71
   6   4  -5   13.50    2.21
   6   4  -5    9.29    3.19
   6   4  -5   18.73    3.31
  -6  -4   5    8.93    3.02
   6   4  -5    9.45    1.82
  -7  -4  -4 1354.94   46.29
  -7  -4  -4 1313.96   46.22
   7   4   4 1307.56   45.96
   7   4   4 1345.43   46.65
   7   4   4 1329.33   46.37
   7   4   4 1316.54   46.31
   7   4   4 1301.98   46.26
   7   4   4 1356.29   46.29
   6   0  -6   82.49    4.36
  -6   0   6   84.91    4.20
   6   0  -6   97.80    4.30
   6   0  -6   97.40    4.11
   6   0  -6   93.97    4.09
   6   0  -6   99.08    4.67
   4  -5  -3   99.84    4.24
  -4   5   3   88.60    3.61
  -4   5   3   95.23    4.12
  -4   5   3   90.16    4.88
   4  -5  -3   97.41    4.63
  -5   3  -6   15.62    2.98
   5  -3   6    6.00    2.73
  -5   3  -6   12.12    2.60
   5  -3   6   10.31    3.48
  -3   6  -1 1179.54   41.01
   3  -6   1 1140.33   41.24
  -3   6  -1 1164.71   41.32
   3  -6   1 1172.32   41.32
   3  -6   1 1211.19   41.25
   7   1  -1  394.38   13.18
   7   1  -1  321.02   12.68
   7   1  -1  403.57   12.95
   7   1  -1  366.13   12.78
   7   1  -1  411.00   13.51
   7   1  -1  388.44   13.53
  -3   2 -12 1373.61   47.74
   3  -2  12 1329.78   47.75
   3  -2  12 1363.08   47.87
  -3   2 -12 1413.97   47.75
  -3   2 -12 1439.94   48.05
   3  -2  12 1303.21   47.64
  -5  -2   9   -1.04    3.28
  -5  -2   9    2.38    1.69
   5   2  -9    7.89    2.98
  -5  -2   9    2.45    3.06
  -5  -7  -6  463.23   16.28
   5   7   6  408.67   16.04
   5   7   6  480.28   16.32
  -5  -7  -6  451.92   15.99
  -5  -7  -6  440.92   16.09
  -1   7   6  579.67   19.88
   1  -7  -6  548.04   19.76
  -1   7   6  544.62   19.87
   1  -7  -6  543.80   19.83
   3   1  14  317.93   12.06
   3   1  14  317.73   11.99
  -3  -1 -14  330.11   11.80
  -3  -1 -14  330.10   12.20
   3   1  14  351.92   12.05
   3   1  14  278.23   12.05
  -3   6   3   -1.94    1.95
   3  -6  -3    1.34    2.53
   3  -6  -3   -1.03    2.90
  -3   6   3    3.17    2.71
  -3   6   3    2.56    3.13
   3  -6  -3    3.45    2.96
  -3   6   3   -1.66    2.98
  -4   3  -9  165.28    6.57
  -4   3  -9  158.57    6.68
   4  -3   9  158.51    6.70
  -4   3  -9  159.03    6.20
   4  -3   9  164.69    6.19
   4  -3   9  158.06    7.01
   1   5 -10  435.72   15.78
  -1  -5  10  431.82   15.82
  -1  -5  10  436.83   15.39
  -1  -5  10  430.56   15.96
  -1  -5  10  431.62   15.84
   1   5 -10  432.45   15.75
  -6  -3   6   13.62    1.74
   6   3  -6   16.47    3.03
  -6  -3   6   15.10    3.09
   6   3  -6   22.22    2.98
  -6  -3   6   12.22    2.62
  -6  -3   6   19.34    3.87
  -3  -2  12  788.15   28.34
  -3  -2  12  791.80   28.43
   3   2 -12  862.29   28.15
  -3  -2  12  817.76   28.16
   3   2 -12  702.75   28.38
  -1   2  14   73.65    4.35
   1  -2 -14   70.83    3.99
   1  -2 -14   69.53    4.13
  -1   2  14   73.86    3.95
   6  -1  -5  499.73   18.00
   6  -1  -5  490.31   17.88
  -6   1   5  502.80   17.73
  -6   1   5  485.97   17.51
   6  -1  -5  535.40   17.79
  -4   3   9  182.41    7.07
  -4   3   9  178.09    6.66
  -4   3   9  172.38    6.50
   4  -3  -9  184.03    7.32
   2   5  13  640.08   23.14
  -2  -5 -13  667.59   23.28
  -2  -5 -13  621.60   23.19
  -2  -5 -13  673.04   23.33
   2  -5 -10  213.38    8.44
  -2   5  10  234.44    8.95
  -2   5  10  227.63    8.53
   2  -5 -10  224.90    8.66
  -1  -8  -4  996.73   34.67
   1   8   4  967.47   34.62
  -1  -8  -4  952.56   34.66
   1   8   4  961.93   34.74
   1   8   4  982.73   34.68
  -1  -8  -4  988.08   34.43
   1   8   4 1007.00   34.49
   4   5  -8  197.89    7.61
  -4  -5   8  194.29    8.01
  -4  -5   8  177.61    7.84
  -4  -5   8  198.05    7.57
  -3   1 -13   72.42    3.90
   3  -1  13   60.35    4.29
  -3   1 -13   61.20    4.35
   3  -1  13   72.21    3.85
  -3   1 -13   65.11    4.12
   3  -1  13   69.69    3.86
   3  -1  13   68.61    4.17
  -1   7  -3   23.54    3.06
   1  -7   3   40.14    3.19
  -1   7  -3   25.36    3.71
   1  -7   3   33.49    3.11
  -1   7  -3   26.31    3.16
   1  -7   3   32.75    3.43
  -4  -5 -12  574.77   20.01
  -4  -5 -12  545.81   20.53
  -4  -5 -12  566.80   20.54
  -4  -5 -12  580.52   20.39
   3   3  14   21.16    3.44
   3   3  14   25.42    3.38
   3   3  14   21.65    3.48
  -3  -3 -14   24.64    2.59
   5   0  11  148.35    6.04
   5   0  11  152.25    6.26
  -5   0 -11  169.95    6.28
   5   0  11  149.91    6.74
   5   0  11  150.45    6.65
  -6   2  -4    6.11    2.66
  -6   2  -4    4.95    2.28
   6  -2   4    7.71    2.92
   6   6   6  236.32    9.04
  -6  -6  -6  243.97    8.52
  -6  -6  -6  220.44    9.62
   6   6   6  236.81    8.89
  -6  -6  -6  229.34    9.09
   6   6   6  226.03    8.50
  -6  -6  -6  232.06    9.03
   5  -4   0  723.68   22.20
  -5   4   0  715.21   22.16
  -5   4   0  606.35   21.56
  -5   4   0  731.10   22.25
   5  -4   0  742.41   21.96
   5  -4   0  739.36   22.16
  -3   4  -9  770.22   27.25
  -3   4  -9  776.83   27.56
  -3   4  -9  782.36   27.48
   3  -4   9  776.16   27.27
   3  -4   9  763.22   27.45
   3  -4   9  787.17   27.67
   5  -1  10  284.11   11.07
  -5   1 -10  280.69   10.65
   5  -1  10  289.82   10.89
   5  -1  10  288.37   10.66
   5  -1  10  288.55   10.35
   3   8   5   45.43    3.79
  -3  -8  -5   53.88    3.71
  -3  -8  -5   53.22    2.76
   3   8   5   46.69    3.86
   3   8   5   45.83    4.00
   3   8   5   50.85    3.85
   3   8   5   49.50    2.82
   1  -6   7   24.63    3.35
  -1   6  -7   23.46    3.45
   1  -6   7   23.29    3.02
  -1   6  -7   24.02    2.92
   1  -6   7   25.36    3.07
   7   2  -2  204.17    7.57
   7   2  -2  195.94    6.99
   7   2  -2  197.05    6.90
   7   2  -2  170.11    6.50
   7   2  -2  164.25    6.37
   7   2  -2  183.57    7.24
   7   4   0   12.37    2.63
   7   4   0   18.01    2.76
  -7  -4   0    9.79    1.73
   7   4   0   12.33    2.30
   7   4   0   11.00    2.06
   7   4   0   10.79    3.85
   7   4   0   10.26    1.17
   7   4   0   15.92    2.84
  -7  -4   0   11.10    2.30
  -2  -6   8  210.46    8.55
  -2  -6   8  227.05    8.42
   2   6  -8  216.58    8.54
  -2  -6   8  209.68    7.66
  -2  -6   8  211.71    8.51
  -2  -6   8  211.11    8.57
   2   6  -8  223.76    8.33
  -1  -8   0 1297.79   46.25
  -1  -8   0 1265.02   46.31
  -1  -8   0 1335.48   46.11
   1   8   0 1297.06   46.37
   1   8   0 1334.44   46.25
   1   8   0 1327.55   46.13
  -1  -8   0 1376.59   46.40
   1   8   0 1319.46   46.28
   1   8   0 1305.70   46.33
   5   2  12   58.52    4.08
   5   2  12   57.30    3.23
  -5  -2 -12   59.55    3.12
   5   2  12   49.48    4.61
   5   2  12   67.79    3.73
   3   8   0   89.26    4.56
   3   8   0   88.10    4.60
   3   8   0   93.76    4.03
  -3  -8   0   88.18    4.08
  -3  -8   0   72.92    4.56
   3   8   0   82.89    4.53
   3   8   0   92.35    4.74
   3   8   0   79.51    4.87
   5  -4  -1  480.50   18.06
  -5   4   1  506.60   18.13
  -5   4   1  479.57   17.56
   5  -4  -1  538.00   17.85
   5  -4  -1  538.39   18.09
  -5   4   1  529.45   18.16
   5   7  -1   66.54    3.65
  -5  -7   1   53.59    2.50
   5   7  -1   51.61    4.04
   5   7  -1   62.78    2.96
   5   7  -1   65.96    4.30
  -5  -7   1   67.99    3.76
   5   7  -1   62.43    3.98
   5  -4   1    1.11    2.97
  -5   4  -1    4.25    2.87
   5  -4   1    5.50    2.33
  -5   4  -1    3.32    2.79
   5  -4   1    3.53    3.00
   2  -2  13  951.91   33.43
   2  -2  13  934.99   33.32
  -2   2 -13  943.02   33.45
  -2   2 -13  962.66   33.26
   2  -2  13  953.49   33.31
  -2   2 -13  942.43   33.33
   2  -2  13  920.96   33.23
   5   3  12  114.18    5.98
  -5  -3 -12  135.60    6.05
   5   3  12  137.26    6.42
   5   3  12  132.12    6.12
  -5  -3 -12  143.76    5.28
  -5  -3 -12  139.45    6.37
   0   5 -10   32.31    3.18
   0  -5  10   23.23    3.11
   0  -5  10   20.32    3.50
   0  -5  10   25.15    2.77
   0  -5  10   21.24    3.14
   3  -2 -12  167.43    6.55
   3  -2 -12  166.14    7.20
  -3   2  12  175.25    7.07
   3  -2 -12  185.76    7.19
  -3   2  12  163.27    6.46
  -6   1  -7   73.08    3.28
   6  -1   7   57.06    2.34
   6  -1   7   68.85    3.58
  -6   1  -7   71.58    3.65
   6  -1   7   77.12    4.04
   6   6  -1   18.22    3.41
   6   6  -1   23.55    3.40
  -6  -6   1   22.82    2.87
  -6  -6   1   25.56    3.85
   6   6  -1   21.33    2.10
   6   6  -1   19.92    1.58
   6   6  -1   22.99    2.94
   6   6  -1   23.40    2.49
   6  -2  -3 1157.90   37.44
   6  -2  -3 1229.05   37.33
   6  -2  -3 1189.27   37.23
  -6   2   3 1163.99   37.07
  -1  -5 -13   92.17    4.83
  -1  -5 -13   80.03    4.57
   1   5  13   89.14    4.52
  -1  -5 -13   88.00    4.51
  -2  -8   1  941.58   34.49
   2   8  -1  991.62   34.47
  -2  -8   1  989.06   34.24
  -2  -8   1  981.26   34.59
   2   8  -1  943.13   34.46
   2   8  -1  989.47   34.22
   7   4   5  710.52   24.40
   7   4   5  706.11   24.01
  -7  -4  -5  664.27   23.97
  -7  -4  -5  710.73   23.95
   7   4   5  672.62   24.08
   7   4   5  657.73   23.55
   7   3   6   65.94    4.95
   7   3   6   74.64    3.99
   7   3   6   70.60    4.30
   7   3   6   71.22    3.06
  -2  -4 -14  146.81    6.16
   2   4  14  136.98    6.12
  -2  -4 -14  133.84    6.21
   2   4  14  138.40    6.32
   1   1 -14  773.96   27.22
   1   1 -14  757.57   27.31
   1   1 -14  754.28   27.07
  -1  -1  14  777.65   27.11
   6   3  10  166.92    6.25
   6   3  10  166.42    7.44
  -6  -3 -10  172.65    7.07
  -6  -3 -10  157.55    7.37
   6   3  10  166.36    7.10
  -6  -3 -10  166.80    6.31
   6   3  10  170.59    7.02
  -6  -3 -10  175.31    6.27
  -3  -7   5    7.37    3.01
  -3  -7   5    9.68    3.71
   3   7  -5    1.37    3.18
  -3  -7   5    2.98    3.42
   3   7  -5    7.96    3.45
   3   7  -5    6.63    3.19
   3   7  -5    5.00    2.64
  -3  -7   5    1.70    2.89
  -5   3   6 1092.87   36.71
   5  -3  -6 1089.99   36.94
   5  -3  -6 1022.67   36.48
   3  -6   2  249.66    9.45
   3  -6   2  233.52    9.26
  -3   6  -2  239.71    8.84
  -3   6  -2  239.21    9.34
   3  -4 -10   11.91    3.05
  -3   4  10   16.47    3.22
  -3   4  10   16.47    2.23
   3  -4 -10   12.55    3.43
   3  -4 -10   13.58    2.27
  -3   5   8  217.12    8.70
  -3   5   8  241.94    8.41
   3  -5  -8  217.34    8.79
   3  -5  -8  213.44    8.31
   3  -5  -8  226.64    8.71
  -3   5   8  218.84    8.90
   6   2  10    7.48    2.61
   6   2  10    7.86    3.88
  -6  -2 -10    5.83    2.06
  -6  -2 -10    5.78    3.56
   6   2  10    2.06    3.10
   6   2  10    6.26    3.37
   6   2  10    8.47    1.96
   0  -6   8  176.44    6.71
   0  -6   8  168.52    6.99
   0   6  -8  168.50    6.92
   0  -6   8  146.53    6.97
   0  -6   8  163.23    6.95
   0   6  -8  178.79    6.92
   7   2   6    6.19    3.29
   7   2   6    6.82    1.90
   7   2   6    7.52    3.85
  -7  -2  -6    6.26    2.01
   7   2   6    6.79    2.69
   7   1   5   16.71    2.35
   7   1   5   12.83    2.71
  -7  -1  -5   13.28    2.43
   7   1   5   14.90    3.52
   7   1   5   11.89    2.48
   7   1   5    6.73    1.62
  -2  -2  13  131.12    5.46
   2   2 -13  122.22    5.23
  -1  -4 -14  214.17    8.89
  -1  -4 -14  234.46    8.94
   1   4  14  232.06    8.83
  -1  -4 -14  221.99    8.99
   7   3  -2  237.89    8.92
   7   3  -2  228.32    8.92
   7   3  -2  227.19    8.80
   7   3  -2  236.60    8.45
   7   3  -2  227.86    9.26
  -7  -3   2  235.06    8.46
   0  -7   5   13.03    3.15
   0  -7   5   21.18    3.09
   0  -7   5   19.54    3.26
   0   7  -5   26.04    3.14
   0   7  -5   17.69    2.91
   0  -6 -11  308.65   11.94
   0   6  11  322.76   11.94
   0   6  11  314.46   12.32
   0  -6 -11  312.94   12.13
   0  -6 -11  329.18   11.85
   0   6  11  328.99   11.60
  -4   4  -7  469.46   16.78
  -4   4  -7  453.69   16.72
   4  -4   7  475.87   17.11
  -4   4  -7  456.85   16.31
   4  -4   7  468.88   16.75
  -3   6   4  305.43   12.04
   3  -6  -4  317.04   11.83
   3  -6  -4  321.80   12.13
   3  -6  -4  312.00   11.98
   3  -6  -4  314.90   11.64
  -3   6   4  320.54   12.17
  -3   6   4  333.29   11.63
  -3   6   4  350.55   11.96
  -4   1 -12  885.41   31.29
  -4   1 -12  858.13   30.87
   4  -1  12  872.30   31.11
   4  -1  12  889.05   30.92
   4  -1  12  868.18   30.79
  -4   1 -12  894.18   30.94
   4  -5   3  867.09   31.66
   4  -5   3  896.62   31.36
  -4   5  -3  907.43   31.27
  -4   5  -3  894.11   31.70
   4  -5   3  915.15   31.75
  -4   5  -3  887.07   31.69
  -5   4   2  474.52   17.09
  -5   4   2  478.70   16.55
   5  -4  -2  515.59   16.73
  -5   4   2  506.95   17.17
   5  -4  -2  458.59   17.04
   5  -4  -2  433.17   16.50
   5  -4  -2  500.07   17.06
   4  -5  -4  138.25    6.19
   4  -5  -4  154.46    5.79
  -4   5   4  149.80    5.82
  -4   5   4  142.49    6.43
  -4   5   4  140.16    5.38
   2   8   6   37.05    3.91
  -2  -8  -6   52.53    3.77
  -2  -8  -6   59.12    3.06
   2   8   6   49.98    3.10
   2   8   6   49.43    3.82
  -2  -8  -6   56.75    3.81
   2   8   6   46.71    3.55
   2   8   6   45.89    3.96
  -1  -8  -5    3.44    2.50
   1   8   5    4.73    2.55
   1   8   5    4.69    3.24
   1   8   5    1.39    3.15
  -1  -8  -5    6.62    3.36
   1   8   5    6.01    2.50
  -1  -8  -5    8.01    3.24
   1   8   5    0.17    3.36
  -4  -4 -13  481.34   16.79
  -4  -4 -13  436.86   17.04
  -4  -4 -13  463.74   16.51
   4   4  13  484.01   17.21
   4   4  13  465.09   17.12
   4  -1 -11   33.72    2.30
  -4   1  11   29.68    2.02
  -4   1  11   37.95    3.48
   4  -1 -11   30.96    3.41
  -2   3 -12   31.29    3.12
   2  -3  12   39.36    3.26
  -2   3 -12   34.67    3.68
   2  -3  12   34.99    3.48
   2  -3  12   33.04    3.38
  -2   3 -12   38.97    3.16
   5  -4   2  310.92   11.25
  -5   4  -2  304.76   11.18
   5  -4   2  283.26   11.06
   5  -4   2  314.07   11.18
  -5   4  -2  287.39   11.24
   7   1  -2   95.02    4.47
  -7  -1   2   90.91    3.59
   7   1  -2  101.71    3.98
   7   1  -2   92.54    3.32
   7   1  -2  105.85    3.68
   7   1  -2   98.71    4.35
   7   0   1    2.10    1.96
   7   0   1    2.47    1.79
   7   0   1    7.10    2.52
   7   0   1    7.05    1.62
   7   0   1    3.08    1.10
   4   2 -11   12.35    2.93
  -4  -2  11   11.22    2.88
  -4  -2  11    7.42    0.98
  -4  -2  11    9.14    2.99
  -4  -2  11   15.48    2.46
   7   0   2  652.39   22.13
   7   0   2  570.94   21.82
   7   0   2  657.23   21.94
   7   0   2  687.97   22.26
   7   0   2  668.60   22.09
   7   0   2  732.80   22.85
  -2  -5  10  149.30    6.40
  -2  -5  10  157.79    6.61
  -2  -5  10  141.90    6.45
   2   5 -10  140.10    6.32
   2   5 -10  149.26    6.30
  -4  -6 -11    7.54    1.52
  -4  -6 -11    8.22    3.85
  -4  -6 -11    5.52    2.71
  -4  -6 -11    3.66    3.15
   6   5  -4   68.88    4.00
  -6  -5   4   73.71    4.29
   6   5  -4   60.49    3.50
  -6  -5   4   69.99    4.80
   6   5  -4   62.96    3.64
   6   5  -4   65.98    4.30
  -6  -5   4   71.25    4.24
  -6  -5   4   71.59    3.55
  -6  -5   4   74.74    4.23
   6   5  -4   63.13    2.63
   3  -3  11   29.81    2.85
   3  -3  11   33.00    3.19
  -3   3 -11   32.07    2.91
  -3   3 -11   30.41    3.13
   3  -3  11   31.24    3.58
  -5  -5 -11  890.18   31.75
   5   5  11  893.51   31.72
   5   5  11  942.07   31.73
  -5  -5 -11  866.00   31.16
  -5  -5 -11  913.07   31.75
  -5  -5 -11  949.43   31.51
  -5  -5 -11  920.35   31.84
  -3  -5 -13  251.87    9.42
   3   5  13  238.86    9.31
   3   5  13  248.96    9.76
  -3  -5 -13  224.10    9.38
  -3  -5 -13  242.54    9.39
  -2  -7 -10  536.69   19.93
  -2  -7 -10  577.25   19.96
  -2  -7 -10  553.15   19.56
   2   7  10  558.92   19.92
   2   7  10  537.93   19.97
  -2  -6 -12  141.81    6.30
  -2  -6 -12  134.43    6.01
  -2  -6 -12  129.82    6.12
   2   6  12  137.90    6.00
  -2  -6 -12  136.70    5.51
  -2  -6 -12  130.12    6.02
   2  -6  -8  452.42   18.08
  -2   6   8  505.35   18.13
  -2   6   8  486.25   18.21
   2  -6  -8  494.63   17.96
   2  -6  -8  506.57   17.84
  -2   6   8  535.06   17.92
   7   0   0    1.71    1.69
   7   0   0    1.41    1.43
   7   0   0    0.70    1.68
   7   0   0    2.08    2.81
   7   0   0   -0.19    1.31
   7   0   0   -1.32    2.57
  -7  -4   1  270.05    9.76
   7   4  -1  305.77   10.35
   7   4  -1  264.79    9.95
   7   4  -1  285.02   10.16
  -7  -4   1  267.20    9.98
   7   4  -1  288.00   10.74
   7   4  -1  267.38    9.74
  -5  -7  -7  344.06   12.23
  -5  -7  -7  333.36   12.59
  -5  -7  -7  333.82   12.41
   5   7   7  329.44   12.28
   5   7   7  333.63   12.55
  -1  -8   1    6.22    3.50
  -1  -8   1    9.44    2.80
   1   8  -1   10.72    2.81
  -1  -8   1    3.18    3.10
  -1  -8   1    4.26    3.02
   1   8  -1    4.75    3.08
   1   8  -1    5.42    3.44
   1   8  -1    1.90    3.02
  -4  -7   4   57.94    4.26
  -4  -7   4   70.12    3.78
   4   7  -4   72.71    4.20
   4   7  -4   71.00    3.49
  -4  -7   4   64.28    4.43
  -4  -7   4   69.12    4.62
  -4  -7   4   66.81    4.22
   4   7  -4   62.12    4.15
   3   8   6  315.25   12.19
   3   8   6  333.73   12.26
  -3  -8  -6  315.24   12.04
   3   8   6  326.90   11.63
   3   8   6  319.63   12.20
  -3  -8  -6  324.31   11.58
   1   1  15  389.26   14.22
  -1  -1 -15  382.99   14.18
  -1  -1 -15  377.97   14.44
   1   1  15  390.37   14.14
   1   1  15  362.77   14.25
  -1  -1 -15  402.96   14.16
  -1   4  13  399.14   14.37
  -1   4  13  383.38   14.73
   1  -4 -13  400.84   14.25
  -4  -7  -9  190.20    7.85
  -4  -7  -9  184.43    7.15
  -4  -7  -9  176.01    7.26
  -4  -7  -9  175.65    6.38
   4   7   9  169.82    7.12
   5   4  -8 2046.33   67.97
  -5  -4   8 2077.17   68.25
  -5  -4   8 2039.50   68.07
   5   4  -8 2084.69   68.07
  -5  -4   8 2019.17   67.87
  -5  -4   8 2019.85   67.83
   5   4  -8 1822.28   67.55
  -4   2 -11    2.24    2.49
   4  -2  11   -6.39    3.61
   4  -2  11   -1.71    3.07
  -4   2 -11    5.08    2.72
   4  -2  11   -1.15    2.35
   2  -1  14  587.37   20.86
  -2   1 -14  604.46   20.77
  -2   1 -14  559.37   20.99
   2  -1  14  565.06   20.94
  -2   1 -14  582.13   20.93
   2  -1  14  579.29   20.79
  -4  -8  -3   77.85    3.86
   4   8   3   77.07    4.84
  -4  -8  -3   77.64    4.25
   4   8   3   68.62    4.35
   4   8   3   86.31    3.46
  -4  -8  -3   78.40    4.55
   4   8   3   79.28    4.39
   4   8   3   83.51    4.75
  -4  -8  -3   86.17    3.58
   5  -2  -8  277.39   10.10
   5  -2  -8  246.81   10.12
  -5   2   8  270.81    9.78
  -5   2   8  274.60    9.87
   5  -2  -8  243.47    9.97
  -6  -1   7  246.76    9.32
   6   1  -7  235.73    8.99
   6   1  -7  231.10    8.74
  -6  -1   7  228.83    8.97
   3   8  -1    7.65    3.13
  -3  -8   1    4.10    2.50
  -3  -8   1    1.25    3.39
  -3  -8   1    7.02    3.37
  -3  -8   1    7.46    3.71
   3   8  -1    0.83    3.33
   3   8  -1    4.67    3.33
   3   8  -1    1.69    2.52
   7   0   3  147.89    5.47
   7   0   3  130.05    4.85
  -7   0  -3  156.03    5.64
  -7   0  -3  141.16    4.95
   7   0   3  164.84    5.53
   7   0   3  161.59    6.55
   7   0   3  159.57    5.42
   1  -6 -10   23.94    3.05
   1  -6 -10   24.14    3.05
  -1   6  10   25.67    3.03
  -1   6  10   25.55    3.85
  -1  -2 -15 1143.23   39.01
   1   2  15 1051.54   39.09
  -1  -2 -15 1147.30   39.11
   1   2  15 1101.39   39.04
  -1  -2 -15 1093.56   39.04
   1   2  15 1114.21   38.96
  -4  -8  -2   42.69    3.54
  -4  -8  -2   39.77    2.77
   4   8   2   42.05    3.72
  -4  -8  -2   36.86    3.67
   4   8   2   38.19    3.49
   4   8   2   41.75    3.98
   4   8   2   37.17    3.85
  -4  -8  -2   41.62    2.67
   4   8   2   40.89    2.46
   5   1  12  390.20   13.43
   5   1  12  389.97   13.37
   5   1  12  369.58   13.66
   5   1  12  351.69   13.67
  -5  -1 -12  341.96   13.30
  -6   2  -5  347.44   12.88
   6  -2   5  359.26   13.07
  -6   2  -5  364.80   13.11
  -5   1   9  155.98    6.47
   5  -1  -9  173.20    6.64
   5  -1  -9  137.60    5.56
   5  -1  -9  167.72    5.69
  -5   1   9  178.68    6.42
   5  -1  -9  172.93    6.52
  -6  -2   7  226.64    7.88
  -6  -2   7  177.24    6.98
  -6  -2   7  231.10    8.38
   6   2  -7  215.04    7.69
   6   2  -7  235.19    7.89
  -6  -6  -7   34.47    3.67
  -6  -6  -7   43.24    3.60
   6   6   7   38.26    3.56
   6   6   7   43.77    3.15
  -6  -6  -7   36.64    2.43
   2  -7  -1  138.82    5.87
   2  -7  -1  119.65    6.16
  -2   7   1  133.90    6.10
   2  -7  -1  134.61    5.15
  -2   7   1  127.45    6.03
  -2   7   1  138.23    5.93
   2  -7  -1  134.57    5.74
   2  -7  -1  130.06    5.78
  -3   5  -7    3.63    3.17
   3  -5   7    3.43    3.07
  -3   5  -7    3.28    2.12
  -3   5  -7   -1.22    2.97
   3  -5   7   -3.48    3.64
  -6  -5  -9   23.35    3.68
   6   5   9   20.36    3.37
   6   5   9   24.97    3.11
  -6  -5  -9   21.51    3.24
  -6  -5  -9   21.59    2.03
  -6  -5  -9   23.67    3.05
  -4  -8  -4    4.07    1.76
   4   8   4   -0.33    2.92
   4   8   4   -1.03    3.03
   4   8   4    1.75    1.63
   4   8   4    6.73    3.46
   4   8   4   -0.19    3.34
  -4  -8  -4    1.66    2.96
  -4  -8  -4    0.21    2.52
  -4  -8  -4   -1.74    3.01
  -1   7   7  133.40    5.79
   1  -7  -7  134.04    5.77
   1  -7  -7  128.01    5.71
   2  -7  -2    4.99    3.00
   2  -7  -2    4.94    3.47
  -2   7   2    8.55    3.01
   2  -7  -2    8.37    2.70
  -2   7   2    9.49    3.39
  -2   7   2    7.59    2.44
  -2   7   2    6.51    3.22
   2  -7  -2    9.46    3.19
  -3  -7 -10  636.38   22.78
   3   7  10  641.00   22.80
  -3  -7 -10  644.94   22.80
   3   7  10  627.63   22.78
  -3  -7 -10  639.60   22.36
  -3  -7 -10  626.35   23.06
   7   4   6    4.35    3.84
   7   4   6    5.79    3.01
  -7  -4  -6    3.98    2.94
  -7  -4  -6    1.37    3.54
  -7  -4  -6    0.30    2.69
   7   4   6    3.64    2.76
   7   4   6    2.43    0.97
  -5   2  -9  240.65    9.36
  -5   2  -9  257.55    9.49
   5  -2   9  246.53    9.46
   5  -2   9  241.76    9.86
   5  -2   9  252.09    8.98
   3   0  14  430.57   16.28
  -3   0 -14  457.86   16.09
  -3   0 -14  446.10   16.43
  -3   0 -14  441.96   16.33
   3   0  14  437.29   16.12
   3   0  14  454.77   16.30
   3   0  14  448.61   16.14
   0  -3  13   75.61    4.38
   0  -3  13   74.73    3.87
   0   3 -13   73.65    4.24
   0   3 -13   69.75    4.06
   0   3 -13   80.60    4.36
  -5   4   3   65.42    4.19
  -5   4   3   72.23    4.36
   5  -4  -3   72.47    4.12
  -5   4   3   72.43    3.17
   5  -4  -3   72.21    3.38
  -6   0  -9   37.73    2.66
   6   0   9   43.92    2.36
  -6   0  -9   37.55    2.96
   6   0   9   38.53    3.38
   6   0   9   45.76    3.09
   4   0  13   43.11    3.66
  -4   0 -13   44.18    3.86
   4   0  13   42.46    3.25
   4   0  13   44.45    3.13
  -4   0 -13   42.45    3.16
  -6  -4 -10   88.94    3.91
   6   4  10  101.44    5.20
  -6  -4 -10   91.53    3.51
   6   4  10   94.07    4.78
  -6  -4 -10   93.00    5.13
  -6  -4 -10  102.94    4.84
   6   4  10   95.29    4.89
   7   2  -3   11.55    3.44
   7   2  -3   11.38    1.88
  -7  -2   3   18.68    2.75
   7   2  -3    8.61    2.65
   7   2  -3    4.69    1.01
   7   2  -3   15.84    2.60
   7   2  -3    7.12    2.91
  -2   6  -6  325.22   11.51
   2  -6   6  325.56   11.87
   2  -6   6  313.52   11.53
   2  -6   6  278.33   11.69
  -2   6  -6  326.92   11.85
  -5  -4 -12   82.62    4.80
  -5  -4 -12   81.73    3.34
   5   4  12   81.00    4.91
   5   4  12   69.56    4.54
   5   4  12   80.79    4.36
  -5  -4 -12   73.63    4.52
  -5  -4 -12   74.17    3.83
   1   7  -6  177.71    7.34
  -1  -7   6  176.95    7.49
  -1  -7   6  176.32    7.33
  -1  -7   6  178.67    7.29
  -1  -7   6  177.72    6.96
   1   7  -6  184.40    7.19
   5   6  -5   36.71    3.69
   5   6  -5   39.34    3.06
   5   6  -5   44.14    3.33
   5   6  -5   39.26    3.61
  -5  -6   5   39.98    3.27
  -5  -6   5   36.61    3.59
  -5  -6   5   33.19    3.73
  -2  -7   6   36.03    3.55
  -2  -7   6   38.81    3.36
  -2  -7   6   33.13    2.17
  -2  -7   6   39.71    3.68
  -2  -7   6   37.83    3.91
   2   7  -6   31.55    3.18
   2   7  -6   35.37    3.66
   2   7  -6   41.15    3.59
  -5   4  -3    1.44    2.97
   5  -4   3   -1.13    3.01
   5  -4   3    1.00    2.56
  -5   4  -3    1.97    2.75
   5  -4   3    1.11    2.92
   5  -4   3    2.12    1.14
   5   7  -2  154.73    7.23
   5   7  -2  166.60    7.11
   5   7  -2  172.49    6.94
   5   7  -2  181.55    6.61
  -5  -7   2  179.17    7.16
  -5  -7   2  172.97    7.26
  -5  -3   9   10.94    2.11
   5   3  -9   12.01    3.27
  -5  -3   9   12.92    3.71
  -5  -3   9   11.14    1.96
  -5  -3   9    6.55    1.28
  -5  -3   9    6.51    3.25
  -1   7  -4  509.47   17.76
   1  -7   4  489.66   17.74
  -1   7  -4  458.22   17.96
   1  -7   4  495.64   17.89
   1  -7   4  503.65   17.78
  -1   7  -4  494.43   17.82
  -2   4  12  155.57    6.74
  -2   4  12  148.37    6.19
   2  -4 -12  153.48    6.19
   2  -4 -12  158.00    5.97
   7   0  -1  180.62    6.22
   7   0  -1  150.51    5.99
   7   0  -1  182.47    7.03
   7   0  -1  170.58    6.77
   7   0  -1  183.82    6.20
   7   0  -1  166.13    6.30
   0  -1 -15   13.56    3.00
   0   1  15   15.65    2.38
   0  -1 -15   15.84    3.27
   0   1  15   10.27    2.94
   0  -1 -15   16.32    3.29
  -3   6  -3   24.15    3.60
   3  -6   3   26.38    2.56
   3  -6   3   22.42    3.28
   3  -6   3   33.47    3.72
  -3   6  -3   29.63    2.52
   4   8   1  291.23   11.08
  -4  -8  -1  274.90   11.00
  -4  -8  -1  301.72   10.51
   4   8   1  293.95   11.16
   4   8   1  284.94   10.45
  -4  -8  -1  287.19   10.47
   4   8   1  291.18   11.16
   4   8   1  283.07   10.89
  -2  -8   2  134.53    6.35
  -2  -8   2  130.89    6.21
   2   8  -2  137.97    6.25
  -2  -8   2  138.94    6.32
   2   8  -2  142.70    5.74
  -2  -8   2  141.44    5.80
   2   8  -2  135.48    6.08
  -2  -8   2  130.44    6.19
   2  -7   0  332.94   12.60
   2  -7   0  342.10   12.21
  -2   7   0  351.02   12.43
   2  -7   0  337.22   12.79
  -2   7   0  335.49   12.83
  -2   7   0  333.75   12.58
   2  -7   0  342.78   12.65
   6   6  -2  331.84   12.04
   6   6  -2  332.45   11.78
   6   6  -2  300.67   11.87
  -6  -6   2  341.24   12.05
   6   6  -2  318.09   12.26
  -6  -6   2  321.52   12.40
   6   6  -2  346.98   12.48
   6  -2  -4  299.50   11.00
  -6   2   4  293.90   10.53
   6  -2  -4  281.52   10.87
   0   8   2  469.50   16.85
   0  -8  -2  487.33   16.94
   0  -8  -2  414.39   16.98
   0  -8  -2  463.57   16.94
   0   8   2  468.95   16.79
   0  -8  -2  480.13   16.74
   0   8   2  462.25   16.99
  -3  -6 -12  133.34    6.19
  -3  -6 -12  122.44    6.23
  -3  -6 -12  146.90    5.41
   3   6  12  139.78    6.10
  -3  -6 -12  126.33    6.37
  -3  -6 -12  144.01    6.07
   7   5   3   13.72    3.09
   7   5   3   14.57    2.66
  -7  -5  -3   15.62    2.73
   7   5   3   12.43    1.24
  -7  -5  -3   14.29    2.50
   7   5   3   13.54    2.49
   7   5   3   11.06    3.87
   7   5   3   10.41    2.93
  -1  -6 -12    4.67    2.53
   1   6  12   -2.98    3.43
  -1  -6 -12    4.90    3.29
   1   6  12    3.08    3.05
  -1  -6 -12    1.81    3.24
  -1  -6 -12    7.31    3.21
  -2  -2 -15  581.90   20.05
  -2  -2 -15  568.74   20.25
   2   2  15  540.88   20.25
  -2  -2 -15  550.79   20.26
   2   2  15  545.77   20.27
   2   2  15  570.65   20.23
   7   5   2  292.52    9.69
   7   5   2  281.90    9.58
   7   5   2  292.56    9.16
  -7  -5  -2  304.62    9.71
   7   5   2  281.62    9.86
   7   5   2  293.53    9.77
   7   5   2  257.37   10.41
  -5   3  -7   55.73    3.71
  -5   3  -7   58.60    2.51
  -5   3  -7   62.65    3.61
   5  -3   7   61.93    4.43
   5  -3   7   61.85    3.83
  -3  -4 -14 1254.08   42.19
  -3  -4 -14 1192.53   41.97
   3   4  14 1201.70   42.31
   3   4  14 1167.23   42.26
   3   4  14 1184.03   42.37
   1   8   6  251.87    9.71
   1   8   6  251.11    9.46
   1   8   6  241.94    9.94
  -1  -8  -6  260.70    9.39
   1   8   6  247.70    9.42
  -1  -8  -6  253.15    9.78
   1   8   6  253.75    9.62
  -1  -8  -6  241.18    9.74
  -2   7   3  110.60    5.27
   2  -7  -3  111.33    5.20
   2  -7  -3  112.84    4.96
   2  -7  -3  112.77    5.13
   2  -7  -3  109.21    5.29
  -2   7   3  110.85    5.62
  -2   7   3  108.95    4.79
  -2   7   3  108.60    5.27
  -2   3  13  176.80    7.02
  -2   3  13  160.26    6.58
   1  -5 -12  146.70    5.86
   1  -5 -12  145.77    5.77
  -1   5  12  127.18    6.16
  -1   5  12  123.68    4.91
  -1   5  12  146.59    5.72
   0  -7  -9   30.03    3.70
   0  -7  -9   27.99    2.85
   0   7   9   20.19    3.77
   0   7   9   20.53    2.43
   0  -7  -9   26.26    3.09
   0   7   9   34.53    3.34
  -6  -1 -10  726.20   25.66
   6   1  10  716.16   25.06
   6   1  10  703.02   25.08
   6   1  10  690.63   25.31
   6   1  10  694.08   25.36
  -6  -1 -10  733.12   25.08
   3  -6  -5   78.41    3.43
  -3   6   5   81.75    4.47
   3  -6  -5   61.18    3.81
  -3   6   5   80.17    4.05
  -3   6   5   79.40    4.66
   3  -6  -5   76.80    4.42
  -3   6   5   76.31    3.54
   3  -6  -5   73.92    4.29
   0  -8  -1  106.90    4.83
   0   8   1  106.87    4.95
   0  -8  -1   87.34    5.26
   0   8   1  109.29    4.97
   0  -8  -1  104.66    4.85
   0  -8  -1  122.01    5.31
   0   8   1  105.82    5.25
   0  -8  -1  105.92    5.28
   0  -8  -3  364.65   13.14
   0  -8  -3  343.14   13.19
   0  -8  -3  343.23   13.08
   0   8   3  344.43   12.93
   0  -8  -3  356.15   12.89
   0   8   3  361.25   13.19
   0   8   3  352.59   12.97
   7   1   6   83.33    3.36
   7   1   6   78.47    3.70
  -7  -1  -6   77.08    3.41
   7   1   6   71.72    4.58
   7   1   6   83.24    3.85
  -5  -6 -10   44.85    3.04
  -5  -6 -10   45.02    3.68
   5   6  10   51.56    3.86
  -5  -6 -10   49.45    4.44
  -5  -6 -10   41.47    3.87
   7   3   7   60.43    3.76
   7   3   7   60.44    4.29
   7   3   7   49.66    4.16
  -7  -3  -7   63.25    4.38
  -7  -3  -7   55.66    2.73
   7   3   7   55.68    2.62
  -7   0  -4  147.04    5.91
   7   0   4  140.71    5.83
   7   0   4  146.23    6.67
   7   0   4  136.41    5.72
   7   0   4  153.15    5.79
  -7   0  -4  132.34    5.22
  -1  -3  13   19.18    3.14
   1   3 -13   25.71    3.41
  -1  -3  13   25.44    3.10
   1   3 -13   14.49    2.69
   4  -4  -8  721.04   25.10
  -4   4   8  710.42   25.33
   4  -4  -8  729.05   25.56
  -4   4   8  708.60   25.10
   1   7  10   19.92    2.84
  -1  -7 -10   16.99    3.26
  -1  -7 -10   23.33    3.49
  -1  -7 -10   16.78    2.56
   1   7  10   16.86    3.54
   1   7  10   14.73    3.11
  -2  -1 -15   11.76    3.62
   2   1  15   10.64    3.27
  -2  -1 -15    5.81    3.45
   2   1  15    9.90    3.15
  -2  -1 -15   11.05    2.93
   2   1  15    4.79    2.97
  -6   1   6  672.95   24.29
   6  -1  -6  709.27   24.36
   6  -1  -6  669.27   24.42
   6  -1  -6  708.13   24.54
   4  -5   4   24.73    2.33
  -4   5  -4   26.51    3.45
  -4   5  -4   28.47    3.26
  -4   5  -4   28.01    1.92
   4  -5   4   27.46    3.28
   4   8   5   83.67    5.19
  -4  -8  -5   85.37    4.57
   4   8   5   71.95    4.91
   4   8   5  100.20    4.78
  -4  -8  -5   92.87    4.39
  -4  -8  -5   86.93    4.85
   4   8   5   93.34    5.17
   4   8   5   88.90    3.72
  -4  -8  -5   98.89    3.72
   1  -3 -14    6.95    2.95
  -1   3  14   10.23    3.42
  -1   3  14    6.22    2.78
  -5  -5   7    3.95    3.12
   5   5  -7    4.14    3.11
   5   5  -7    1.79    2.74
  -5  -5   7    9.61    3.45
  -5  -5   7    2.29    3.62
  -5  -5   7    3.03    2.61
   4  -5  -5  223.19    8.85
  -4   5   5  227.16    8.53
  -4   5   5  219.07    9.02
  -4   5   5  216.00    8.45
   4  -5  -5  234.46    8.37
   7   5   4  135.84    5.47
   7   5   4  155.75    5.48
  -7  -5  -4  182.73    6.52
  -7  -5  -4  172.03    6.25
   7   5   4  159.10    6.33
   7   5   4  184.52    6.42
  -7  -5  -4  180.39    6.65
   7   5   4  177.40    6.52
   7   5   4  173.02    6.48
   2   8   7   28.84    3.32
  -2  -8  -7   26.35    3.34
  -2  -8  -7   27.10    3.54
  -2  -8  -7   26.50    2.43
   2   8   7   24.94    3.55
   2   8   7   20.51    3.19
   2   8   7   27.53    3.72
  -3   0  13  684.19   24.17
  -3   0  13  676.67   24.11
   3   0 -13  706.98   24.57
  -3   0  13  682.09   24.45
   1   0  15  835.68   30.04
   1   0  15  868.84   30.05
  -1   0 -15  841.95   30.08
  -1   0 -15  844.43   29.98
  -1   0 -15  848.55   30.17
  -3  -6   8   19.80    3.16
   3   6  -8   17.69    3.03
   3   6  -8   15.63    3.37
  -3  -6   8   16.12    3.52
   7   1  -3    2.05    2.94
  -7  -1   3    7.81    2.39
   7   1  -3    3.63    2.29
   7   1  -3    5.68    3.05
   7   1  -3    6.00    2.71
   7   1  -3    3.60    1.94
   7   5   1   33.96    2.21
   7   5   1   41.48    3.46
  -7  -5  -1   28.72    4.08
   7   5   1   42.90    3.00
  -7  -5  -1   39.85    3.17
   7   5   1   29.30    1.81
   7   5   1   35.99    2.70
   7   5   1   29.55    4.20
   7   5   1   44.87    3.45
   0  -2  14  137.22    5.79
   0  -2  14  142.79    6.09
   0   2 -14  150.87    6.12
   0   2 -14  137.76    6.00
   0  -2  14  135.29    6.16
   0   2 -14  128.59    6.05
   7   2   7    2.87    2.81
   7   2   7    1.59    3.40
  -7  -2  -7    3.68    1.98
   7   2   7    2.59    1.87
   7   2   7    4.38    3.88
  -7  -3   3  172.84    6.72
  -7  -3   3  163.22    6.22
   7   3  -3  167.77    6.77
   7   3  -3  163.30    6.22
  -7  -3   3  167.33    6.84
   7   3  -3  182.20    7.26
   7   3  -3  175.18    6.84
   0  -2 -15  219.76    8.58
   0   2  15  220.61    8.55
   0  -2 -15  211.46    8.69
   0  -4  12   -0.22    3.10
   0  -4  12   -0.10    2.41
   0   4 -12   -1.63    2.95
   0   4 -12    0.61    2.74
   2   0 -14   54.85    3.38
  -2   0  14   42.32    3.80
  -1  -4  12  341.95   12.30
   1   4 -12  349.17   12.76
  -1  -4  12  331.99   12.70
   1   4 -12  342.31   12.47
   2  -5   9  340.24   12.29
  -2   5  -9  340.19   12.61
  -2   5  -9  325.28   12.24
   2  -5   9  336.10   12.57
   6   4  -6  483.62   16.99
  -6  -4   6  453.99   17.03
  -6  -4   6  436.46   16.83
  -6  -4   6  481.08   16.95
   6   4  -6  473.64   16.97
  -6  -4   6  457.77   16.60
   6   4  -6  481.63   16.50
  -6  -4   6  459.32   17.22
   0  -4 -14    6.27    3.08
   0  -4 -14   -1.52    3.28
   0   4  14    2.03    3.48
   0   4  14    1.08    2.74
   6   0  -7  118.07    4.66
   6   0  -7  111.64    5.18
   6   0  -7  113.67    4.67
   6   0  -7  114.04    5.11
  -6   0   7  111.10    5.11
   1  -5  10   16.82    3.03
  -1   5 -10   19.13    2.96
   1  -5  10   17.16    3.08
   0   5  13  203.83    7.66
   0  -5 -13  192.27    7.68
   0  -5 -13  186.63    7.62
   0   5  13  180.49    8.04
   0  -5 -13  190.64    8.02
  -1  -8   2    6.65    3.03
  -1  -8   2    9.24    2.85
   1   8  -2   11.73    2.80
   1   8  -2    9.51    3.27
   1   8  -2   12.21    3.32
  -1  -8   2    6.91    3.66
  -1  -8   2   12.55    3.25
   0   0 -15   29.76    3.27
   0   0  15   30.63    3.40
   0   0 -15   24.84    3.78
   0   0 -15   25.87    3.25
   0   0  15   25.45    3.58
  -2   7  -1   52.21    3.37
   2  -7   1   53.95    3.46
  -2   7  -1   49.84    3.96
   2  -7   1   50.95    3.84
   2  -7   1   51.89    4.17
  -2   7  -1   50.32    3.78
   7   4  -2  148.96    5.82
   7   4  -2  129.54    5.67
   7   4  -2  154.46    6.62
  -7  -4   2  141.77    5.26
  -7  -4   2  149.53    5.63
   7   4  -2  153.80    6.17
  -3  -4  11  336.90   12.55
   3   4 -11  328.32   11.88
  -3  -4  11  335.04   12.39
   3   4 -11  342.67   12.43
  -4  -6   7  319.26   12.54
  -4  -6   7  327.34   12.20
  -4  -6   7  325.08   12.29
   4   6  -7  335.33   12.10
  -2   1  14  128.59    5.86
   2  -1 -14  135.04    5.54
  -2   1  14  130.92    5.52
   2  -1 -14  132.98    5.81
   2  -1 -14  120.24    6.16
   0   8   0    4.03    3.08
   0  -8   0    5.16    2.78
   0   8   0    4.89    3.35
   0   8   0   -1.75    2.84
   0  -8   0   -1.88    2.98
   0  -8   0    1.52    2.71
   0  -8   0    4.18    3.34
  -3  -8  -7  113.70    5.20
   3   8   7  106.10    5.43
   3   8   7   70.31    5.23
   3   8   7  122.45    5.48
  -3  -8  -7  115.66    4.42
  -3  -8  -7  110.87    5.09
   3   8   7  110.33    5.37
   0  -8  -4   18.14    3.36
   0  -8  -4   17.84    3.15
   0   8   4   18.77    3.06
   0   8   4   20.31    3.21
   0  -8  -4   15.35    3.53
   0  -8  -4   17.09    2.82
   0   8   4   19.19    3.20
   4   8   0   25.90    3.43
  -4  -8   0   34.53    2.33
   4   8   0   32.27    3.83
  -4  -8   0   21.46    3.51
   4   8   0   27.20    3.64
   4   8   0   29.78    2.51
  -4  -8   0   38.55    2.70
   1  -3  13  351.85   13.49
   1  -3  13  366.55   13.31
  -1   3 -13  359.64   13.39
   1  -3  13  354.79   13.39
  -1   3 -13  383.36   13.45
  -1   3 -13  361.43   13.53
   6  -1   8  138.57    5.60
   6  -1   8  128.90    5.90
   6  -1   8  123.94    4.74
  -6   1  -8  141.60    5.59
  -6   1  -8  132.16    5.35
   2  -4  11  375.63   14.11
   2  -4  11  388.59   14.15
  -2   4 -11  377.78   13.97
   2  -4  11  386.83   13.95
  -2   4 -11  385.10   14.01
   2  -7  -4  193.30    7.58
  -2   7   4  192.92    7.55
   2  -7  -4  197.31    7.78
  -2   7   4  200.03    8.12
  -2   7   4  202.86    7.86
   2  -7  -4  190.12    8.06
  -2   7   4  197.12    7.94
   2  -7  -4  197.34    7.83
  -1  -3 -15   48.17    3.81
   1   3  15   49.73    3.84
  -1  -3 -15   53.60    3.89
   3   8  -2 1279.34   45.76
   3   8  -2 1276.87   45.73
  -3  -8   2 1370.07   45.76
  -3  -8   2 1323.14   45.52
  -3  -8   2 1239.14   45.72
   3   8  -2 1314.02   45.44
   3   8  -2 1301.54   45.69
  -3  -8   2 1277.33   45.84
   7   0  -2  145.78    5.58
   7   0  -2  147.07    6.15
   7   0  -2  143.51    6.23
  -7   0   2  154.54    5.70
   7   0  -2  144.83    5.39
   7   0  -2  143.51    5.67
  -6  -3   7 1066.66   37.83
   6   3  -7 1109.07   38.18
   6   3  -7 1125.97   38.24
  -6  -3   7 1068.77   38.11
  -6  -3   7 1084.71   38.22
  -6  -3   7 1089.69   38.46
  -4  -4  10  252.23    9.62
   4   4 -10  243.29    9.40
   4   4 -10  236.41    8.68
  -4  -4  10  262.75    9.64
  -4  -4  10  252.12    9.26
  -3  -1  13  162.11    6.51
  -3  -1  13  171.65    6.85
   3   1 -13  161.39    6.44
   3   1 -13  147.10    6.95
  -5   4   4  413.83   10.90
   5  -4  -4  414.20   11.40
   5  -4  -4  417.31   10.83
  -5   4   4  400.59   11.48
   5   7   8   45.80    3.98
   5   7   8   47.98    3.32
  -5  -7  -8   46.85    3.57
  -5  -7  -8   51.34    3.19
  -5  -7  -8   51.75    3.82
   3   3 -12   -0.08    3.11
   3   3 -12    2.56    1.98
  -3  -3  12    2.25    2.50
  -3  -3  12    6.99    3.07
  -5  -1  10  210.42    8.37
   5   1 -10  226.51    8.45
  -5  -1  10  240.84    8.60
  -5  -1  10  200.75    7.64
   7   5   5    9.38    2.86
  -7  -5  -5    4.76    2.81
   7   5   5   11.20    2.94
  -7  -5  -5    9.13    3.34
  -7  -5  -5    7.59    2.64
   7   5   5   10.93    3.13
   3  -1 -13  205.93    7.75
  -3   1  13  203.78    7.50
  -3   1  13  214.56    8.28
  -3   1  13  198.44    7.72
   3  -1 -13  205.72    8.41
   2   3  15   -4.41    3.16
  -2  -3 -15   -0.90    3.40
   2   3  15   -4.87    3.60
  -2  -3 -15   -1.96    2.70
   2   3  15   -1.40    2.99
  -2  -3 -15   -2.64    3.37
  -1   2 -14  239.63    9.15
   1  -2  14  219.23    9.06
  -1   2 -14  238.74    9.28
   1  -2  14  245.48    9.04
  -1   2 -14  233.59    9.19
   1  -2  14  231.18    9.23
  -5   3   7   15.64    2.56
   5  -3  -7   11.00    1.14
   5  -3  -7   15.35    3.17
   5  -4   4  229.11    8.58
   5  -4   4  217.97    7.87
  -5   4  -4  220.87    8.56
  -5   4  -4  207.23    8.49
   5  -4   4  216.10    8.51
   7   5   0   18.92    3.23
   7   5   0   17.61    3.53
  -7  -5   0   15.79    3.94
   7   5   0   17.32    2.64
   7   5   0   16.23    2.37
  -7  -5   0   17.14    2.61
   7   5   0   14.79    2.88
   7   5   0   19.93    1.73
   4   2  14  126.07    5.75
   4   2  14  120.10    6.11
   4   2  14  119.61    5.60
  -4  -2 -14  116.30    5.03
   7   4   7  100.38    3.96
  -7  -4  -7  118.57    5.11
  -7  -4  -7  120.35    5.18
   7   4   7  116.01    5.93
  -7  -4  -7  127.56    5.75
   7   4   7  113.90    5.24
   7   4   7  120.91    5.15
   6  -2   6 1559.91   51.55
  -6   2  -6 1376.09   51.41
  -6   2  -6 1520.47   51.56
   4   8   6  239.32    9.47
  -4  -8  -6  229.25    9.39
  -4  -8  -6  222.01    9.58
  -4  -8  -6  241.50    9.34
   4   8   6  237.93    9.78
  -4  -8  -6  258.54    8.81
   4   8   6  257.48    9.88
  -6  -6  -8   10.45    3.40
  -6  -6  -8   12.69    2.04
   6   6   8   14.39    3.10
   6   6   8   15.32    3.04
  -6  -6  -8    9.14    3.36
   4  -3  10  507.63   18.56
  -4   3 -10  506.46   18.57
  -4   3 -10  525.01   18.53
  -4   3 -10  504.12   18.31
   4  -3  10  519.01   18.85
   4  -3  10  526.46   18.27
  -7   0  -5  940.30   27.09
   7   0   5  939.86   27.11
   7   0   5  993.77   27.11
   7   0   5  912.40   27.14
  -7   0  -5  857.03   26.75
   7   0   5  941.10   27.67
  -1  -6   9   35.47    2.47
  -1  -6   9   32.70    3.32
  -1  -6   9   31.06    3.58
   1   6  -9   35.67    3.42
   1   6  -9   36.14    3.38
  -1  -6   9   33.35    3.75
  -1  -2  14  184.82    8.00
   1   2 -14  195.95    7.97
   1   2 -14  198.53    7.67
   1   2 -14  193.02    7.95
  -1  -2  14  207.39    7.79
  -1   6  -8  369.65   13.03
   1  -6   8  357.17   13.19
  -1   6  -8  340.44   13.25
   1  -6   8  337.49   13.11
   1  -6   8  361.01   13.04
  -4   3  10  444.69   16.10
  -4   3  10  459.30   15.96
  -4   3  10  440.89   16.35
   4  -3 -10  458.54   16.61
   0  -7   6  193.90    7.79
   0  -7   6  182.58    7.76
   0   7  -6  192.02    7.67
   0   7  -6  197.10    7.73
   0  -7   6  192.16    7.62
   4  -2 -11 1348.07   47.21
  -4   2  11 1370.24   47.10
  -4   2  11 1340.97   46.74
   4  -2 -11 1314.05   47.20
   3   7  -6 1766.92   60.63
  -3  -7   6 1779.68   60.60
   3   7  -6 1774.06   60.43
  -3  -7   6 1660.38   60.70
  -3  -7   6 1684.92   60.47
  -3  -7   6 1724.45   60.74
   3   7  -6 1714.18   60.58
   5   0 -10  591.61   18.70
  -5   0  10  580.12   18.60
  -5   0  10  587.27   18.70
  -5   0  10  494.22   17.99
  -5   0  10  496.77   17.98
   2  -5 -11   34.27    3.01
  -2   5  11   31.43    3.59
  -2   5  11   39.02    2.97
   2  -5 -11   29.25    3.31
   3  -6   4  846.51   30.42
  -3   6  -4  874.88   30.70
   3  -6   4  841.56   30.67
  -3   6  -4  888.83   30.34
   3  -5  -9   88.81    5.07
   3  -5  -9  102.40    4.90
  -3   5   9  103.90    4.43
   3  -5  -9   92.20    4.32
  -3   5   9  102.75    4.97
   4   3  14  316.54   11.95
   4   3  14  316.06   12.04
  -4  -3 -14  308.58   11.36
   6   5  -5  456.14   15.58
  -6  -5   5  452.86   15.90
  -6  -5   5  453.72   15.52
   6   5  -5  462.68   15.87
  -6  -5   5  442.85   16.16
  -6  -5   5  475.12   15.83
  -6  -5   5  462.08   15.85
   6   5  -5  402.69   15.09
   6   5  -5  461.75   15.96
   6   5  -5  427.13   15.61
  -4  -3  11   58.60    3.53
   4   3 -11   64.63    2.97
   4   3 -11   56.73    4.11
  -4  -3  11   61.78    3.15
  -4  -3  11   57.04    4.18
  -4  -3  11   67.22    3.93
   4   3 -11   54.36    3.91
  -2  -1  14   83.74    4.23
   2   1 -14   87.20    4.26
   0  -8   1    5.91    3.30
   0   8  -1   -1.76    3.48
   0   8  -1    1.19    2.90
   0  -8   1    2.26    2.81
   0  -8   1    4.40    2.76
   0  -8   1    5.21    3.31
   0   8  -1    2.40    3.16
   4  -4   8  397.14   14.53
  -4   4  -8  393.43   14.52
   4  -4   8  410.63   14.14
  -4   4  -8  382.11   14.07
  -4   4  -8  402.29   14.55
   4  -4   8  392.40   14.86
   0   8   5  242.69    9.34
   0  -8  -5  234.77    9.56
   0   8   5  247.88    9.51
   0   8   5  234.98    9.38
   0  -8  -5  248.43    9.20
   0  -8  -5  242.42    9.46
   1   8   7   23.31    3.04
   1   8   7   21.36    3.20
   1   8   7   17.48    3.83
   1   8   7   19.90    2.81
  -1  -8  -7   26.96    3.37
  -1  -8  -7   23.18    2.62
  -1  -8  -7   17.06    3.47
  -2   7  -2   71.00    4.81
   2  -7   2   92.07    4.70
  -2   7  -2   78.34    4.57
   2  -7   2   92.80    5.01
  -2   7  -2   79.13    4.14
   2  -7   2   85.28    4.43
   2   8  -3  350.31   13.33
  -2  -8   3  360.15   13.49
   2   8  -3  361.77   13.06
  -2  -8   3  349.81   13.12
  -2  -8   3  359.55   13.41
  -2  -8   3  361.95   13.33
  -2  -8   3  357.41   13.34
   2   8  -3  353.76   13.37
   3   5 -10  247.38    9.34
  -3  -5  10  245.56    9.57
   3   5 -10  217.86    9.34
  -3  -5  10  245.02    9.31
   7   2  -4   15.50    3.40
  -7  -2   4   10.49    2.77
   7   2  -4    9.76    2.77
  -7  -2   4   15.56    2.60
   7   2  -4    9.02    2.81
   7   2  -4   10.18    2.12
   5  -1  11  317.55   11.71
   5  -1  11  325.27   12.03
  -5   1 -11  333.92   12.00
   5  -1  11  319.68   12.28
   5  -1  11  336.40   12.43
   6   7   3   76.38    5.02
   6   7   3   81.93    4.30
  -6  -7  -3   76.79    4.16
   6   7   3   81.40    4.46
   6   7   3   84.89    4.44
  -6  -7  -3   75.81    3.81
   6   7   3   83.25    3.63
  -6  -7  -3   78.16    5.13
   6   7   3   64.80    2.66
  -5  -7   3  249.05    9.38
  -5  -7   3  261.65    9.59
  -5  -7   3  226.72    9.91
   5   7  -3  242.93    9.23
   5   7  -3  253.46    9.45
   5   7  -3  232.91    8.93
   5   7  -3  249.60    9.66
   5   7  -3  213.76    9.45
   6  -3   0   42.00    2.72
  -6   3   0   40.36    3.63
   6  -3   0   47.74    3.31
  -6   3   0   39.97    3.41
   6  -3   0   48.50    3.60
  -6  -3 -11  273.17    9.45
   6   3  11  269.26   10.13
  -6  -3 -11  256.43   10.36
   6   3  11  257.64   10.14
   6   3  11  244.80   10.02
  -6  -3 -11  258.28   10.17
   6   3  11  260.08    9.45
   6   3  11  247.59   10.60
   3  -3 -12  209.29    7.84
  -3   3  12  244.23    8.81
   3  -3 -12  231.08    8.94
  -3   3  12  232.16    8.19
  -3   4 -10   14.01    3.15
  -3   4 -10   12.73    2.61
   3  -4  10   11.31    3.20
   3  -4  10   13.71    2.62
   3  -4  10   12.46    3.60
  -3   4 -10    5.98    2.97
  -2   0 -15    4.91    3.02
   2   0  15    3.68    3.11
   2   0  15    9.68    3.16
  -2   0 -15    7.93    3.65
   2   0  15   10.50    3.51
  -2   0 -15    7.44    3.43
   6  -3   1  919.38   32.61
  -6   3  -1  905.06   32.61
  -6   3  -1  927.13   32.78
   6  -3   1  977.49   32.53
   6  -3   1  890.09   32.69
   3  -6  -6   25.88    2.22
  -3   6   6   27.65    3.27
   3  -6  -6   29.80    3.54
  -3   6   6   28.64    2.87
  -3   6   6   29.99    3.72
   3  -6  -6   26.10    2.90
   3  -6  -6   29.57    3.23
   4   7  -5   -3.42    2.69
  -4  -7   5    7.32    3.41
  -4  -7   5   -0.80    3.67
  -4  -7   5    4.13    3.85
  -4  -7   5    4.13    3.06
   4   7  -5    1.57    3.38
   4   7  -5    3.92    3.22
   6   6  -3  852.56   29.59
   6   6  -3  813.72   29.18
   6   6  -3  811.33   29.27
   6   6  -3  827.01   29.11
  -6  -6   3  825.64   29.24
  -6  -6   3  827.80   29.55
   6   6  -3  825.58   29.46
  -6  -6   3  872.13   29.50
   6  -2  -5   48.13    3.40
   6  -2  -5   53.89    3.52
  -6   2   5   39.67    1.84
  -6   2   5   50.36    2.73
   6  -2  -5   48.58    3.05
  -1   7   8  261.94    9.46
   1  -7  -8  268.37    9.38
   1  -7  -8  258.40    9.44
  -1   7   8  230.24    8.73
  -5  -2  10  270.60    9.77
  -5  -2  10  275.77   10.38
  -5  -2  10  262.88   10.64
   5   2 -10  268.25   10.34
  -4  -7 -10    3.77    3.73
  -4  -7 -10    5.35    3.18
  -4  -7 -10    4.05    2.84
  -4  -7 -10    4.08    1.32
  -4  -5   9  276.65   10.27
  -4  -5   9  254.71   10.53
  -4  -5   9  261.29   10.80
  -4  -5   9  282.57   10.69
   4   5  -9  283.22   10.39
  -4  -5 -13    6.20    1.94
  -4  -5 -13    5.06    3.47
  -4  -5 -13    1.63    3.12
   4   5  13    3.95    3.82
   6   7   2  414.36   14.23
   6   7   2  400.17   14.94
   6   7   2  406.38   14.56
  -6  -7  -2  398.76   14.23
   6   7   2  378.44   13.89
  -6  -7  -2  399.02   15.05
  -6  -7  -2  422.59   14.60
   6   7   2  402.39   14.63
   6   7   2  397.92   14.65
  -2   6   9  179.47    5.66
   2  -6  -9  162.99    5.74
  -2   6   9  158.27    6.10
  -2   6   9  157.71    6.07
   2  -6  -9  161.33    5.46
   4   8  -1  386.97   14.83
  -4  -8   1  402.07   14.62
   4   8  -1  402.50   14.21
  -4  -8   1  395.77   13.99
   4   8  -1  394.37   14.63
  -4  -8   1  382.99   14.27
   4   8  -1  410.08   14.58
   5   0  12  567.16   20.52
   5   0  12  567.67   20.64
  -5   0 -12  509.92   20.70
  -5   0 -12  580.28   20.24
   5   0  12  563.98   20.17
   5   0  12  597.12   20.28
   6   2  11   -2.19    4.03
   6   2  11   -2.03    2.18
   6   2  11   -3.00    3.21
   6   2  11    1.65    2.75
  -6  -2 -11   -0.11    3.84
  -6  -2 -11    0.74    2.19
   6   2  11    3.55    3.11
   7   1   7  606.80   19.30
  -7  -1  -7  469.44   18.73
  -7  -1  -7  559.28   19.08
   7   1   7  588.76   18.93
   7   1   7  568.35   19.26
   7   1   7  577.86   19.05
   7   1   7  566.35   19.64
   6   7   4  175.56    7.52
  -6  -7  -4  178.47    7.34
   6   7   4  178.10    8.03
   6   7   4  183.04    7.47
   6   7   4  186.28    6.94
  -6  -7  -4  180.02    7.96
  -6  -7  -4  176.90    7.19
  -2  -6   9  520.20   19.06
  -2  -6   9  524.45   18.99
   2   6  -9  535.58   19.01
  -2  -6   9  539.38   19.14
  -2  -6   9  517.20   18.40
  -2  -6   9  528.89   19.05
   2   6  -9  533.27   18.91
   2  -7  -5  404.85   14.60
   2  -7  -5  399.85   14.63
   2  -7  -5  406.60   14.45
  -2   7   5  397.10   14.48
  -2   7   5  396.25   14.71
  -2   7   5  399.73   14.87
   2  -7  -5  381.91   14.82
  -2   7   5  411.28   14.67
  -1   4 -12  656.76   23.47
  -1   4 -12  664.35   23.45
   1  -4  12  644.14   23.40
   1  -4  12  666.43   23.45
  -6   3   1  103.08    4.86
  -6   3   1  107.14    4.47
   6  -3  -1  117.89    3.80
   6  -3  -1  106.54    4.47
   6  -3  -1  114.77    4.66
  -1   7  -5  116.25    5.33
   1  -7   5  113.58    5.39
  -1   7  -5  124.39    5.48
   1  -7   5  125.65    5.48
  -1   7  -5  114.75    5.84
   1  -7   5  115.03    5.62
  -4   0  12    6.61    3.06
   4   0 -12    9.70    3.34
  -4   0  12    3.81    1.85
  -4   5  -5  355.54   13.15
   4  -5   5  354.83   13.30
   4  -5   5  320.80   13.12
  -4   5  -5  361.88   12.64
  -4   5  -5  362.04   13.25
   4  -5   5  365.57   12.79
  -7  -5  -6  276.06   10.49
   7   5   6  292.00   10.67
  -7  -5  -6  285.94   10.65
  -7  -5  -6  272.47   10.86
   7   5   6  279.22   10.60
   2   4 -12  382.65   13.40
   2   4 -12  377.72   13.87
   2   4 -12  379.58   13.77
  -2  -4  12  343.03   13.84
  -2   2  14  811.86   28.39
  -2   2  14  812.60   28.65
   2  -2 -14  799.08   28.79
   2  -2 -14  796.37   28.40
   1  -1 -15  543.48   19.22
  -1   1  15  524.46   19.14
   4  -5  -6  675.96   25.31
  -4   5   6  801.52   25.61
   4  -5  -6  706.80   25.81
  -4   5   6  727.82   25.68
  -4   5   6  727.13   25.98
   4  -5  -6  753.55   25.88
   4  -5  -6  760.65   25.52
  -4  -1 -14  708.05   25.93
   4   1  14  731.89   25.77
   4   1  14  707.33   25.59
  -4  -1 -14  731.81   25.49
   7   3   8   60.71    2.79
   7   3   8   61.76    4.00
   7   3   8   56.48    4.19
  -7  -3  -8   60.74    2.84
  -7  -3  -8   60.35    4.62
   6  -3   2 1330.99   45.91
   6  -3   2 1304.71   46.01
  -6   3  -2 1295.85   45.92
   6  -3   2 1314.04   45.89
  -6   3  -2 1314.06   46.05
  -4  -1  12  280.46   10.14
   4   1 -12  252.03   10.44
  -4  -1  12  280.19   10.46
   2   7  11  168.86    6.76
  -2  -7 -11  152.19    7.18
  -2  -7 -11  158.96    6.85
  -2  -7 -11  151.24    6.25
  -2  -7 -11  165.78    6.87
  -3  -2 -15   14.97    2.74
  -3  -2 -15    8.46    3.38
   3   2  15   16.54    3.28
   3   2  15   17.80    3.30
   3   2  15   16.65    3.09
  -3  -2 -15   17.35    3.73
   3   2  15   17.51    3.65
  -6  -5 -10  784.73   28.23
  -6  -5 -10  754.72   28.10
  -6  -5 -10  802.42   28.07
   6   5  10  801.47   28.38
   6   5  10  812.15   28.09
  -6  -5 -10  779.08   27.69
   6   5  10  810.40   28.11
   1   5 -11  108.05    5.33
  -1  -5  11  110.74    5.44
   1   5 -11  119.71    5.49
  -1  -5  11  114.41    4.70
  -1  -5  11  106.29    5.40
  -1  -5  11  113.16    5.50
   2   8   8  769.06   27.93
   2   8   8  757.27   28.10
  -2  -8  -8  765.89   27.68
   2   8   8  851.15   28.00
  -2  -8  -8  798.83   28.01
  -2  -8  -8  766.86   28.00
   2   8   8  825.82   28.10
   7   1  -4  134.22    5.43
   7   1  -4  128.37    5.72
   7   1  -4  129.36    5.34
  -7  -1   4  137.29    5.29
  -7  -1   4  124.65    5.46
   7   1  -4  127.25    5.68
   7   1  -4  130.57    5.85
   7   5  -1  923.64   33.02
  -7  -5   1  950.27   33.65
   7   5  -1  949.32   33.11
  -7  -5   1  947.76   33.21
   7   5  -1  943.18   33.56
   7   5  -1  964.49   33.71
   7   5  -1  933.52   33.20
   7   5  -1  994.17   33.43
   1   8  -3   28.82    3.73
   1   8  -3   35.06    3.26
  -1  -8   3   32.78    3.45
  -1  -8   3   38.47    3.68
  -1  -8   3   34.50    3.77
  -1  -8   3   37.09    3.24
   1   8  -3   39.01    3.70
  -2  -5 -14  110.84    5.31
   2   5  14  108.80    5.35
  -2  -5 -14  106.82    5.43
   7   0  -3  219.61    8.31
   7   0  -3  218.12    8.36
   7   0  -3  220.93    7.89
  -7   0   3  215.54    7.91
   7   0  -3  208.17    7.93
   7   0  -3  206.22    7.52
   0  -3 -15   32.22    3.26
   0   3  15   29.58    3.29
   0  -3 -15   24.39    3.53
  -5  -2 -13    8.91    2.31
   5   2  13    6.39    3.31
   5   2  13    9.38    3.16
   5   2  13    8.30    2.37
   5   2  13    5.14    3.82
  -2  -3  13  258.82    9.66
   2   3 -13  235.01    9.81
   2   3 -13  258.49    9.38
  -3   4  11   84.65    4.69
   3  -4 -11   79.41    4.60
  -3   4  11   87.68    3.95
   3  -4 -11   83.48    4.84
   3  -4 -11   86.57    3.97
   3  -2  13   18.51    3.39
   3  -2  13   23.36    3.33
  -3   2 -13   22.57    3.12
   3  -2  13   18.06    2.87
   3  -2  13   20.63    3.72
  -3   2 -13   20.46    3.89
  -3   2 -13   24.61    3.02
   5   3  13  386.51   14.45
   5   3  13  412.07   14.75
  -5  -3 -13  413.68   13.96
   5   3  13  350.71   14.45
  -5  -3 -13  352.08   14.62
  -5  -3 -13  399.21   14.51
   0  -6   9  475.15   16.97
   0  -6   9  459.89   17.14
   0  -6   9  475.81   17.17
   0   6  -9  486.19   17.14
   0  -6   9  463.52   17.37
   0   6  -9  471.91   17.10
  -6  -7  -1  185.15    7.94
   6   7   1  181.36    6.52
   6   7   1  169.51    7.49
  -6  -7  -1  182.56    7.33
   6   7   1  179.33    7.35
   6   7   1  170.57    6.95
   6   7   1  167.67    7.68
   6   7   1  186.89    7.43
  -6  -7  -1  175.19    6.81
   7   4  -3   49.13    2.95
   7   4  -3   48.70    3.65
   7   4  -3   60.95    4.24
   7   4  -3   56.44    3.96
  -7  -4   3   57.07    3.60
  -7  -4   3   48.13    2.78
  -7  -4   3   38.90    1.88
   7   4  -3   50.44    2.78
  -4  -6 -12  399.56   13.78
  -4  -6 -12  370.13   14.42
  -4  -6 -12  385.18   13.78
  -4  -6 -12  389.81   14.28
  -4  -6 -12  384.41   14.78
   0  -6 -12  104.29    5.51
   0  -6 -12  107.21    5.30
   0   6  12  101.25    5.16
   0   6  12  116.64    4.56
   0  -6 -12  110.06    5.01
   0   6  12  106.95    5.86
   1   0 -15  189.49    7.97
  -1   0  15  196.84    7.37
   1   0 -15  202.10    7.84
  -5  -5 -12  117.36    5.62
   5   5  12  109.90    5.48
  -5  -5 -12  118.76    5.10
  -5  -5 -12  111.93    4.29
  -5  -5 -12  104.61    5.41
   5   5  12  112.51    5.57
   5   5  12  105.83    5.70
  -5  -5 -12  115.80    5.65
   7   3  -4   57.00    3.86
  -7  -3   4   55.93    3.70
  -7  -3   4   51.42    2.46
  -7  -3   4   59.94    3.56
   7   3  -4   51.08    3.56
   7   3  -4   64.25    4.34
   7   3  -4   46.38    2.50
   7  -1   1   23.56    3.16
  -7   1  -1   26.38    3.28
   7  -1   1   26.69    2.16
   7  -1   1   24.12    2.33
  -7   1  -1   23.37    2.33
  -7  -2  -8   -0.28    0.88
  -7  -2  -8   -1.34    2.03
   7   2   8   -0.97    1.97
   7   2   8    3.04    3.40
   7   2   8    4.90    3.15
  -3  -8  -8  367.69   12.68
  -3  -8  -8  362.20   13.20
   3   8   8  330.83   13.31
   3   8   8  335.94   13.31
   3   8   8  369.81   13.31
  -3  -8  -8  345.19   13.16
  -6  -7  -5   33.99    3.44
   6   7   5   31.34    4.23
  -6  -7  -5   28.61    2.59
  -6  -7  -5   33.41    3.09
  -6  -7  -5   27.79    4.31
   6   7   5   29.42    3.62
   6   7   5   30.99    2.68
   6   7   5   26.07    3.56
  -2   6  -7   35.76    3.06
   2  -6   7   39.47    3.66
  -2   6  -7   37.56    3.76
   2  -6   7   44.50    3.98
  -3   5  -8   62.64    3.38
   3  -5   8   65.81    3.62
  -3   5  -8   62.62    4.35
  -3   5  -8   61.41    3.98
   3  -5   8   60.18    4.51
   0   1 -15   76.63    4.26
   0   1 -15   71.16    4.30
   0  -1  15   76.88    4.34
   0  -1  15   72.56    4.48
   0   1 -15   74.26    4.78
   5  -4  -5   70.10    4.09
  -5   4   5   60.25    4.15
  -5   4   5   68.54    3.33
   5  -4  -5   63.71    3.01
  -6  -1   8  303.10   11.36
   6   1  -8  295.83   11.12
   6   1  -8  294.10   10.79
  -6  -1   8  293.30   11.09
   7  -1   2  134.54    5.58
   7  -1   2  145.76    5.51
   7  -1   2  146.43    6.01
  -7   1  -2  141.74    5.56
  -7   1  -2  134.85    6.13
   5  -2  -9  916.77   32.54
  -5   2   9  907.55   32.44
   5  -2  -9  915.34   32.58
  -5   2   9  939.38   32.38
  -4  -8  -7   10.30    3.01
   4   8   7    8.56    3.71
  -4  -8  -7    6.26    3.36
  -4  -8  -7    6.45    2.95
   4   8   7   12.68    3.77
   4   8   7   10.22    3.06
  -4  -8  -7    6.69    1.57
  -3  -7 -11   20.37    3.53
   3   7  11   20.34    3.50
  -3  -7 -11   13.83    3.54
  -3  -7 -11   19.32    2.07
  -3  -7 -11   20.48    3.38
  -3  -7 -11   18.36    4.19
   7  -1   0   27.90    1.98
   7  -1   0   30.65    2.45
   7  -1   0   30.50    3.15
   0  -5  11   66.36    3.64
   0  -5  11   63.79    4.33
   0  -5  11   71.67    4.25
   0   5 -11   66.55    4.20
  -5  -6   6  130.96    5.82
   5   6  -6  139.49    5.76
  -5  -6   6  144.04    6.10
  -5  -6   6  133.58    6.13
   5   6  -6  120.90    6.13
  -5   3  -8   47.86    3.57
   5  -3   8   46.26    4.34
   5  -3   8   53.07    3.74
  -5   3  -8   49.45    2.45
  -5   3  -8   51.58    3.61
   5  -3   8   44.47    2.35
   3   8  -3  478.49   17.40
   3   8  -3  476.60   17.25
  -3  -8   3  470.68   16.99
  -3  -8   3  452.21   17.26
   3   8  -3  461.80   17.27
   3   8  -3  473.48   16.94
  -3  -8   3  500.91   17.29
  -3  -8   3  459.65   17.46
   6  -3  -2  372.84   12.95
  -6   3   2  358.38   12.84
   6  -3  -2  369.39   12.49
   6  -3  -2  373.11   12.37
   6  -3  -2  370.51   12.78
  -6   3   2  313.74   12.21
   1  -6 -11 1233.50   43.61
   1  -6 -11 1268.93   43.63
  -1   6  11 1183.48   43.85
  -1   6  11 1269.40   43.60
   1  -1  15   74.52    4.32
  -1   1 -15   74.11    4.47
   1  -1  15   79.26    4.36
  -1   1 -15   75.98    4.55
  -1   1 -15   75.38    4.30
   1  -1  15   71.66    4.44
  -5   4  -5  491.71   14.39
   5  -4   5  494.63   14.33
  -5   4  -5  475.45   14.25
   6   0  10  203.43    7.64
   6   0  10  209.56    7.95
  -6   0 -10  218.04    8.03
   6   0  10  197.60    8.26
  -6  -4 -11   18.52    3.39
   6   4  11   17.69    3.43
  -6  -4 -11   25.81    1.69
   6   4  11   27.65    3.56
  -6  -4 -11   21.51    3.88
  -6  -4 -11   22.45    2.34
   6   4  11   22.61    3.78
   3  -1  14  174.81    6.98
   3  -1  14  167.15    7.20
   3  -1  14  177.36    7.09
  -3   1 -14  176.66    7.56
   3  -1  14  162.62    7.39
  -3   1 -14  165.74    7.24
  -3   1 -14  174.99    7.02
   3   1  15  216.51    8.91
   3   1  15  230.86    8.80
  -3  -1 -15  221.16    9.02
  -3  -1 -15  232.29    8.51
   3   1  15  208.22    8.84
   3   1  15  210.74    8.75
   3   3  15    4.38    3.59
   3   3  15    6.97    3.46
   3   3  15    5.33    3.10
  -3  -3 -15   11.38    2.63
  -3  -3 -15    5.32    3.27
  -6  -2   8   22.29    3.72
  -6  -2   8   13.55    1.33
   6   2  -8   13.77    3.22
  -6  -2   8   18.79    3.33
   6   2  -8   16.62    2.75
  -1  -5 -14  578.53   21.95
  -1  -5 -14  632.49   22.13
   1   5  14  617.92   21.93
  -1  -5 -14  622.88   21.97
   0  -8   2  256.80    9.62
   0   8  -2  237.88    9.78
   0  -8   2  230.85    9.63
   0  -8   2  243.56    9.43
   0  -8   2  249.47    9.70
   0  -8   2  254.65    9.47
   0   8  -2  246.82    9.55
   0   8  -2  246.71    9.43
   3   2 -13  609.04   21.44
  -3  -2  13  607.14   21.63
  -3  -2  13  604.29   21.44
  -3  -2  13  598.96   21.79
   7   0   6  160.47    5.39
   7   0   6  144.66    5.49
  -7   0  -6  140.44    4.78
   7   0   6  148.91    6.40
   7   0   6  139.01    5.43
   7   0   6  122.16    4.43
  -7   0  -6  148.03    5.44
  -1  -7   7  372.47   14.51
   1   7  -7  401.40   14.41
   1   7  -7  396.18   14.31
  -1  -7   7  392.80   14.06
  -1  -7   7  388.02   14.43
  -1  -7   7  377.51   14.49
  -1  -7   7  400.54   14.38
   0   8   6   90.31    4.80
   0  -8  -6   83.53    5.05
   0   8   6   91.44    4.73
   0  -8  -6   91.32    4.91
   0   8   6   97.87    4.98
   0  -8  -6   90.71    4.49
   0  -7 -10   50.08    3.40
   0   7  10   56.06    3.79
   0  -7 -10   48.73    3.78
   0   7  10   32.02    4.31
   0   7  10   48.54    2.98
   0  -7 -10   47.77    3.96
  -6   3  -3    7.59    3.27
   6  -3   3    4.29    2.82
   6  -3   3    0.93    2.65
  -6   3  -3    6.36    2.64
  -6   1   7  225.21    8.35
   6  -1  -7  220.78    8.65
   6  -1  -7  220.84    8.59
   6  -1  -7  213.88    7.99
   6  -1  -7  214.97    8.45
  -2  -7   7   27.64    3.72
  -2  -7   7   30.61    3.77
  -2  -7   7   31.58    3.49
   2   7  -7   35.80    3.86
  -2  -7   7   26.76    3.54
  -2  -7   7   32.79    2.03
   2   7  -7   41.10    3.71
   2   7  -7   31.94    3.23
   3  -2 -13   72.57    4.72
   3  -2 -13   72.91    3.68
  -3   2  13   70.02    3.55
  -3   2  13   75.51    4.50
  -5   2 -10   15.90    3.04
   5  -2  10   18.13    3.86
  -5   2 -10   14.90    2.80
   5  -2  10   11.84    2.98
   5  -2  10   16.41    2.08
  -2  -6 -13   74.89    4.45
  -2  -6 -13   78.88    4.61
  -2  -6 -13   70.39    4.61
   2   6  13   67.75    4.41
  -2  -6 -13   72.72    4.47
  -2   7  -3    1.62    3.40
  -2   7  -3    6.24    2.71
   2  -7   3    3.16    2.71
   2  -7   3    8.05    3.20
  -2   7  -3    1.04    3.13
   2  -7   3    6.64    3.01
  -1   2  15   17.70    3.12
   1  -2 -15   19.42    2.92
   1  -2 -15   22.07    3.30
  -1   2  15   14.95    3.45
   7   4   8  616.81   20.96
   7   4   8  610.57   21.00
  -7  -4  -8  612.66   21.21
  -7  -4  -8  603.18   20.90
   7   4   8  564.05   20.31
  -5  -6 -11  105.96    5.16
  -5  -6 -11   85.10    3.33
  -5  -6 -11  108.83    5.75
  -5  -6 -11  100.49    5.01
  -5  -6 -11  112.13    4.50
   5   6  11  101.51    5.10
  -5  -6 -11   91.75    3.35
  -5  -7  -9    2.82    3.11
  -5  -7  -9   -1.42    3.33
  -5  -7  -9    2.94    2.61
   5   7   9   -0.59    3.30
  -5  -7  -9    2.46    3.97
   5   4  -9   86.24    3.42
  -5  -4   9   91.76    4.24
  -5  -4   9   91.57    4.23
   5   4  -9   94.03    4.61
   5   4  -9   95.08    4.86
  -5  -4   9   92.62    5.29
  -5  -4   9   93.87    4.99
  -7   1  -3  131.39    3.97
  -7   1  -3  135.55    4.71
   7  -1   3  128.61    5.57
   7  -1   3  146.40    4.63
  -4  -4 -14   11.79    2.89
   4   4  14   15.97    3.84
  -4  -4 -14   13.82    2.32
   4   4  14   13.82    3.83
   4  -1  13  275.60   10.98
   4  -1  13  281.92   10.59
  -4   1 -13  300.28   11.40
  -4   1 -13  279.83   10.87
  -4   1 -13  296.74   10.69
   4  -1  13  281.53   10.73
  -5  -8  -3    5.26    1.66
   5   8   3    7.18    3.62
   5   8   3    9.72    3.78
  -5  -8  -3    5.35    3.25
   5   8   3    6.82    1.58
  -5  -8  -3    4.97    2.41
  -5  -8  -3    2.42    2.90
   5   8   3    5.01    3.36
   5   8   3    5.89    2.95
   6   7   0  392.67   13.91
  -6  -7   0  392.67   14.43
   6   7   0  393.46   14.60
  -6  -7   0  392.20   14.88
   6   7   0  365.42   14.67
   6   7   0  389.00   14.54
  -6  -7   0  393.41   13.98
   6   7   0  413.15   14.46
   6   7   0  386.20   14.80
   6   7   0  397.92   14.17
   5  -1 -10   27.23    3.48
  -5   1  10   25.30    3.19
  -5   1  10   23.60    3.01
   5  -1 -10   35.59    3.60
   5  -1 -10   24.81    1.72
   4  -4  -9  216.00    8.18
   4  -4  -9  212.46    8.80
  -4   4   9  236.18    8.22
   4  -4  -9  218.90    8.88
  -4   4   9  223.18    8.67
   7  -1  -1  514.00   16.95
   7  -1  -1  457.61   16.70
   7  -1  -1  465.64   16.71
   7  -1  -1  504.36   17.25
   7  -1  -1  504.94   17.24
   7  -1  -1  474.77   16.72
   4  -1 -12  220.48    8.09
   4  -1 -12  227.55    8.90
  -4   1  12  216.89    8.71
  -4   1  12  215.30    8.03
   3  -3  12  299.23   11.11
  -3   3 -12  284.47   10.77
  -3   3 -12  275.38   10.71
   3  -3  12  289.06   10.61
   3  -3  12  286.59   10.89
  -2   2 -14  195.62    7.97
  -2   2 -14  193.14    7.76
   2  -2  14  197.34    7.69
  -2   2 -14  182.67    7.57
   2  -2  14  179.92    7.69
   2  -2  14  185.18    7.62
   2  -2  14  188.36    7.93
   5   8   2  282.07   10.96
  -5  -8  -2  281.93   10.26
   5   8   2  290.87   10.23
   5   8   2  293.94   10.74
  -5  -8  -2  280.87   10.98
  -5  -8  -2  278.09   10.40
   5   8   2  285.07   11.08
   5   8   2  296.05   11.28
  -1  -7 -11    2.40    2.66
   1   7  11    1.15    3.17
  -1  -7 -11    7.69    3.37
  -1  -7 -11    5.71    3.41
   1   7  11    1.11    2.70
  -3  -5 -14   81.16    4.73
   3   5  14   86.58    5.14
   3   5  14   80.18    4.68
  -3  -5 -14   83.77    4.82
  -3  -5 -14   76.86    4.90
  -3  -5 -14   84.38    3.99
   2   4  15  829.55   30.29
  -2  -4 -15  820.32   30.13
   2   4  15  843.00   30.12
  -2  -4 -15  899.97   30.16
  -2  -5  11   26.55    3.68
  -2  -5  11   31.11    3.56
  -2  -5  11   24.98    3.67
   2   5 -11   31.60    3.73
   2   5 -11   33.20    3.50
   5   8   4  385.72   14.21
   5   8   4  364.36   14.12
  -5  -8  -4  375.59   13.96
   5   8   4  373.56   13.75
   5   8   4  407.08   13.98
  -5  -8  -4  371.81   13.57
  -5  -8  -4  359.20   13.64
  -5  -8  -4  382.11   13.20
   5   8   4  366.48   13.18
  -6   2  -7  176.15    6.93
  -6   2  -7  179.49    7.24
   6  -2   7  175.35    7.18
   6   1  11  127.88    5.72
   6   1  11  149.05    5.74
  -6  -1 -11  134.95    5.74
   6   1  11  149.13    6.29
   6   1  11  141.45    6.29
   4  -2  12 1311.11   46.78
  -4   2 -12 1324.47   46.89
   4  -2  12 1379.53   46.99
   4  -2  12 1344.50   47.19
  -4   2 -12 1355.96   46.95
  -4  -8   2    6.33    3.31
  -4  -8   2    0.71    2.69
   4   8  -2    2.95    2.32
   4   8  -2    6.46    3.48
   4   8  -2    1.41    3.29
  -4  -8   2    4.73    3.95
  -4  -8   2    1.48    1.18
  -6  -6  -9  301.07   11.46
   6   6   9  307.56   11.36
  -6  -6  -9  299.51   10.90
  -6  -6  -9  294.51   11.52
   6   6   9  302.05   11.43
   3  -6   5  289.83   11.52
  -3   6  -5  310.44   11.61
   3  -6   5  300.98   11.16
  -3   6  -5  312.42   11.10
   6   7   6  332.17   12.08
  -6  -7  -6  300.51   12.50
  -6  -7  -6  329.30   11.97
  -6  -7  -6  333.72   12.11
  -6  -7  -6  316.58   11.59
   6   7   6  310.72   11.65
  -2   7   6   10.83    3.79
  -2   7   6   11.14    3.31
  -2   7   6   11.91    3.14
   2  -7  -6   17.68    2.47
   2  -7  -6    6.66    3.32
   2  -7  -6    9.52    3.05
   2  -7  -6   12.27    2.88
  -7  -5  -7    0.91    3.46
  -7  -5  -7    1.27    2.96
  -7  -5  -7    5.65    3.17
   7   5   7   -0.43    3.24
   7   5   7    4.58    3.24
   7   5   7    5.01    3.64
  -2   3 -13   26.43    3.84
  -2   3 -13   20.69    3.33
   2  -3  13   17.72    3.16
  -2   3 -13   27.98    3.37
   2  -3  13   23.15    3.42
   2  -3  13   23.15    3.16
   5   1  13    7.48    2.79
   5   1  13    5.51    3.29
  -5  -1 -13    7.11    2.56
   5   1  13    2.18    2.56
   5   1  13    1.13    3.36
   5   1  13    6.69    3.41
   1   8   8   69.84    4.92
  -1  -8  -8   78.25    4.25
  -1  -8  -8   72.17    4.53
  -1  -8  -8   72.74    3.84
   1   8   8   67.60    3.97
   1   8   8   73.16    4.36
   1   8   8   74.45    4.13
   4   2 -12  226.55    8.13
  -4  -2  12  205.09    8.54
   4   2 -12  208.61    8.71
  -4  -2  12  218.99    8.76
  -1  -4 -15    9.62    3.50
  -1  -4 -15    6.80    3.53
   1   4  15    7.94    3.13
  -1  -4 -15    7.57    3.30
   6  -1   9  653.82   21.88
   6  -1   9  599.69   21.49
   6  -1   9  621.08   22.06
  -6   1  -9  601.91   21.76
  -6   1  -9  624.14   21.87
  -5  -4 -13   99.78    4.55
   5   4  13   93.45    5.19
   5   4  13   99.66    5.43
   5   4  13  101.02    5.62
  -5  -4 -13   98.84    4.04
   5   4  13   88.77    4.93
  -5  -4 -13   98.37    5.05
  -5  -4 -13   95.51    5.27
  -6  -4   7    7.25    4.05
  -6  -4   7   15.28    2.43
   6   4  -7    9.84    3.34
  -6  -4   7   13.71    3.64
  -6  -4   7   13.03    3.36
   6   4  -7   17.07    3.37
  -6  -4   7    7.98    2.78
   6   0  -8   42.86    3.46
   6   0  -8   48.58    2.67
  -6   0   8   50.22    3.51
   6   0  -8   48.87    3.47
  -6   0   8   54.66    3.86
   6   0  -8   44.12    2.46
  -7  -5   2  188.22    7.42
   7   5  -2  192.09    8.11
   7   5  -2  201.53    8.40
   7   5  -2  202.71    7.92
  -7  -5   2  178.83    8.08
   7   5  -2  174.80    7.42
   7   5  -2  195.79    7.23
   7   5  -2  197.59    7.22
  -3  -6 -13   37.96    3.85
  -3  -6 -13   43.52    4.29
  -3  -6 -13   44.08    3.74
  -3  -6 -13   44.54    4.08
   3   6  13   44.29    3.86
   6  -3  -3  125.71    4.84
   6  -3  -3  126.02    5.69
  -6   3   3  115.56    5.54
   6  -3  -3  123.31    5.42
   6  -3  -3  123.52    4.65
  -6   3   3  118.66    4.67
  -3   6   7    7.54    3.70
  -3   6   7    4.82    3.12
   3  -6  -7    8.97    3.16
  -3   6   7    8.93    2.70
   3  -6  -7    9.98    2.63
   3  -6  -7    0.89    3.08
  -5  -5   8   14.82    3.41
   5   5  -8   19.36    3.48
  -5  -5   8   11.68    2.87
  -5  -5   8   12.05    3.22
   5   5  -8   13.73    3.08
  -5  -5   8   19.59    4.07
   2   8  -4    7.21    3.69
   2   8  -4   -2.52    3.59
  -2  -8   4   -1.95    3.68
  -2  -8   4    0.80    3.07
  -2  -8   4    2.01    3.38
  -2  -8   4    0.60    3.27
   2   8  -4    3.71    3.60
  -2  -8   4    0.52    3.35
   2   8  -4    1.85    2.75
  -5   3   8  338.13   10.78
   5  -3  -8  341.77   11.14
  -5   3   8  268.51   10.22
   5   8   1  147.75    6.96
   5   8   1  136.49    6.53
  -5  -8  -1  155.07    5.72
  -5  -8  -1  147.18    6.56
   5   8   1  128.82    6.87
   5   8   1  149.31    5.67
   5   8   1  153.19    6.30
  -1   4  14  155.27    6.54
  -1   4  14  167.90    7.03
   1  -4 -14  159.74    6.29
  -5  -3  10   68.66    3.16
  -5  -3  10   66.90    2.89
   5   3 -10   66.28    4.34
  -5  -3  10   64.95    3.42
  -5  -3  10   65.06    4.31
  -5  -3  10   70.67    4.79
  -1  -6 -13   -0.65    3.21
   1   6  13   -4.22    3.29
  -1  -6 -13    1.79    3.17
  -1  -6 -13    1.14    2.68
   1   6  13    2.03    3.82
  -1  -6 -13    0.46    3.38
   7   6   3   59.04    3.89
   7   6   3   40.45    1.81
  -7  -6  -3   60.32    4.93
   7   6   3   55.57    3.07
  -7  -6  -3   55.73    3.60
   7   6   3   41.18    1.83
   7   6   3   56.24    3.68
   7   6   3   49.34    2.34
   7   6   3   56.84    3.85
  -7  -6  -3   52.79    3.52
  -2  -2  14   12.00    2.75
   2   2 -14    8.57    2.56
  -5  -8  -5  153.00    6.19
   5   8   5  146.99    5.41
   5   8   5  170.96    6.91
   5   8   5  169.52    6.74
   5   8   5  145.11    7.03
  -5  -8  -5  146.00    6.26
  -5  -8  -5  145.71    5.41
  -5  -8  -5  154.93    6.65
   5   8   5  156.26    6.40
   5   7  -4   84.70    4.80
  -5  -7   4   81.56    4.79
   5   7  -4   72.90    4.81
  -5  -7   4   84.76    4.56
   5   7  -4   77.22    4.40
   5   7  -4   85.87    4.04
   7   2  -5  234.94    9.22
   7   2  -5  248.16    9.18
  -7  -2   5  229.24    8.99
  -7  -2   5  249.40    9.19
  -7   1  -4  398.32   14.32
  -7   1  -4  382.39   13.99
   7  -1   4  397.41   14.96
   7  -1   4  400.01   14.31
   1   1 -15   11.80    3.68
  -1  -1  15    9.68    3.00
   1   1 -15    9.34    3.27
   1   1 -15   11.90    2.81
  -6  -6   4  390.65   14.40
   6   6  -4  404.52   14.30
   6   6  -4  394.86   14.46
  -6  -6   4  398.37   14.77
   6   6  -4  392.10   14.37
   6   6  -4  404.56   14.72
  -6  -6   4  407.98   14.76
  -6  -6   4  372.49   15.06
   6   6  -4  399.76   14.78
   7   0  -4  419.76   15.35
   7   0  -4  450.41   15.62
   7   0  -4  427.81   15.34
  -7   0   4  418.84   15.34
   7   0  -4  417.20   15.58
   7   0  -4  446.49   15.66
   6  -2  -6    7.04    2.69
  -6   2   6    8.73    2.31
   6  -2  -6    2.19    2.88
   6  -2  -6    9.92    3.22
   7   6   2  199.11    8.14
   7   6   2  222.51    8.17
   7   6   2  193.58    7.21
   7   6   2  204.92    7.36
   7   6   2  216.27    7.97
  -7  -6  -2  214.92    8.01
   7   6   2  188.71    7.21
   7   6   2  209.38    7.61
  -7  -6  -2  219.73    8.71
  -6   3  -4   52.38    3.66
   6  -3   4   42.46    1.86
   6  -3   4   54.63    3.76
  -6   3  -4   55.18    3.23
   7   1   8  167.33    5.97
  -7  -1  -8  137.09    5.96
   7   1   8  147.65    6.38
   7   1   8  170.26    6.48
  -7  -1  -8  136.50    5.51
   7   1   8  154.60    5.75
   7   1   8  156.87    6.91
  -1   8   2  188.14    7.35
  -1   8   2  176.00    7.48
  -1   8   2  181.90    7.82
   1  -8  -2  180.33    7.41
   1  -8  -2  187.55    7.64
   1  -8  -2  189.52    7.53
   4   6  -8  137.72    6.04
  -4  -6   8  149.60    6.14
  -4  -6   8  135.08    6.44
  -4  -6   8  129.66    6.25
   7  -1  -2  491.69   13.90
   7  -1  -2  510.45   14.46
  -7   1   2  465.95   13.85
   7  -1  -2  500.85   14.37
   7  -1  -2  496.35   14.12
  -7  -6  -4  283.24   11.09
  -7  -6  -4  284.36   10.37
  -7  -6  -4  283.00   10.37
   7   6   4  287.45   10.43
   7   6   4  284.62   10.36
   7   6   4  296.56   10.45
   7   6   4  269.46   10.11
   7   6   4  247.09    9.64
  -2   4  13   11.39    3.48
   2  -4 -13   11.43    2.03
  -2   4  13    9.20    2.52
   3   6  -9   14.21    3.52
  -3  -6   9   16.93    3.37
  -3  -6   9   13.68    3.60
  -3  -6   9   22.44    3.76
   3   6  -9   17.31    3.31
   1  -8  -1  147.32    6.26
  -1   8   1  140.81    6.62
   1  -8  -1  141.52    5.75
   1  -8  -1  147.28    6.43
  -1   8   1  141.57    6.24
   1  -8  -1  130.48    6.04
  -1   8   1  145.18    5.99
   4  -5   6   24.95    4.22
   4  -5   6   26.01    3.19
  -4   5  -6   30.14    3.46
   4  -5   6   27.02    3.50
  -4   5  -6   27.93    3.42
  -4   5  -6   29.43    2.13
  -1   5  13   23.77    1.66
  -1   5  13   26.22    2.99
   1  -5 -13   25.38    2.80
  -1   5  13   22.91    3.90
   1  -5 -13   23.80    3.08
  -2   5 -10  417.32   15.34
  -2   5 -10  418.33   14.96
   2  -5  10  415.37   15.24
  -2   5 -10  361.50   15.07
   2  -5  10  450.78   15.04
   4  -5  -7  432.97   13.43
   4  -5  -7  388.69   13.83
  -4   5   7  427.17   13.48
  -4   5   7  424.14   13.68
   4  -5  -7  326.53   13.03
  -4   5   7  417.68   13.99
   4  -5  -7  418.24   13.96
   1   8  -4  115.83    5.28
  -1  -8   4  116.67    5.60
   1   8  -4   94.36    5.75
  -1  -8   4  109.75    5.56
  -1  -8   4  121.03    5.66
   1   8  -4  117.73    5.57
  -1  -8   4  122.72    5.39
   1  -7  -9  464.88   16.29
   1  -7  -9  459.63   16.33
  -1   7   9  496.16   16.36
  -1   7   9  424.66   15.81
   6   3  -8   24.19    3.35
   6   3  -8   29.75    3.50
  -6  -3   8   22.70    4.15
  -6  -3   8   23.20    2.11
  -6  -3   8   22.77    3.47
  -4  -8  -8   28.80    1.93
   4   8   8   33.54    3.57
  -4  -8  -8   30.55    4.19
  -4  -8  -8   30.56    3.41
   4   8   8   33.91    3.87
  -4  -8  -8   27.02    3.23
   1  -8  -3  649.84   23.06
  -1   8   3  647.86   23.13
   1  -8  -3  634.36   22.93
   1  -8  -3  644.81   22.96
  -1   8   3  649.74   22.90
  -1   8   3  634.19   23.01
  -4   0 -14   59.11    4.60
   4   0  14   58.07    4.22
   4   0  14   60.53    3.79
   4   0  14   50.42    3.60
  -4   0 -14   58.05    3.72
  -6  -5   6  347.83    9.72
   6   5  -6  326.77   10.15
  -6  -5   6  333.29   10.68
  -6  -5   6  327.10   10.19
  -6  -5   6  323.42   10.15
   6   5  -6  324.29    9.83
   6   5  -6  326.58   10.25
  -6  -5   6  326.44   10.03
   0  -7   7   15.33    2.95
   0  -7   7   18.46    3.37
   0   7  -7    9.10    3.19
   0   7  -7   15.36    3.19
   0  -7   7   15.07    3.27
   7   1  -5  353.54   13.10
   7   1  -5  340.99   13.03
  -7  -1   5  370.47   13.14
   7   1  -5  365.25   13.17
   7   1  -5  370.69   13.33
  -7  -1   5  364.71   12.98
   6   7  -1   84.56    4.24
   6   7  -1   76.87    5.28
   6   7  -1   84.79    5.14
  -6  -7   1   88.25    4.63
  -6  -7   1   83.43    5.42
   6   7  -1   83.31    4.91
   6   7  -1   89.12    3.83
   6   7  -1   90.94    4.69
  -2  -8  -9  192.24    8.06
  -2  -8  -9  201.45    7.96
   2   8   9  197.94    8.03
  -2  -8  -9  190.51    7.38
   2   8   9  186.47    8.19
   2   8   9  192.03    7.83
  -7  -4   4   27.58    3.37
  -7  -4   4   23.94    3.47
   7   4  -4   18.25    2.52
   7   4  -4   19.10    3.34
   7   4  -4   26.29    2.36
   7   4  -4   21.73    3.65
  -7  -4   4   20.68    2.23
   0  -8   3  319.63   11.79
   0  -8   3  325.93   11.91
   0  -8   3  300.96   11.98
   0   8  -3  322.70   11.84
   0  -8   3  295.60   11.90
   0  -8   3  320.06   11.77
   0   8  -3  314.21   11.75
  -7  -3  -9   53.25    4.46
  -7  -3  -9   50.59    2.40
   7   3   9   52.97    2.43
   7   3   9   51.56    4.10
   7   3   9   48.12    3.78
   0  -8  -7   89.25    4.91
   0  -8  -7   91.29    4.49
   0  -8  -7   87.03    4.99
   0   8   7   89.29    3.94
   0   8   7   95.39    4.81
   7   6   1   83.37    4.33
   7   6   1   87.75    3.45
  -7  -6  -1   78.33    5.47
   7   6   1   82.47    3.75
   7   6   1   86.80    4.61
   7   6   1   83.80    4.67
  -7  -6  -1   82.75    4.32
   7   6   1   74.21    3.57
  -2   1 -15  173.35    7.09
   2  -1  15  170.90    7.20
   2  -1  15  171.52    7.35
  -2   1 -15  167.19    7.33
   2  -1  15  168.28    7.17
  -2   1 -15  169.29    7.33
  -5   4   6  440.51   15.07
   5  -4  -6  403.36   14.41
   5  -4  -6  414.55   14.98
  -5   4   6  393.43   14.63
  -1   7  -6   79.23    4.35
  -1   7  -6   77.77    4.11
   1  -7   6   73.91    4.61
   1  -7   6   74.11    4.28
   1  -7   6   69.53    4.38
  -1   7  -6   60.61    4.60
  -3  -8  -9  107.99    5.27
   3   8   9  107.91    5.44
   3   8   9   97.37    5.43
  -3  -8  -9  105.79    5.29
  -3  -8  -9  110.17    4.38
   3   8   9  111.18    5.48
   3   7  -7  275.08   10.45
  -3  -7   7  271.38   10.53
   3   7  -7  272.24   10.76
  -3  -7   7  282.02   10.86
  -3  -7   7  283.28   10.72
  -3  -7   7  262.46   10.77
  -3  -7   7  278.96   10.93
   3   7  -7  287.26   10.70
  -1   8   0   25.13    3.91
  -1   8   0   32.13    3.59
   1  -8   0   37.18    3.71
   1  -8   0   26.90    3.35
  -1   8   0   26.40    3.89
  -1   8   0   29.61    3.27
   1  -8   0   26.03    3.50
   1  -8   0   31.07    2.77
  -4  -7   6    2.72    3.25
  -4  -7   6    1.78    3.14
   4   7  -6    0.31    3.28
  -4  -7   6    0.44    3.93
   4   7  -6    6.67    2.83
  -4  -7   6   -0.10    3.66
   3  -5 -10  757.03   25.52
  -3   5  10  791.58   25.31
  -3   5  10  771.44   25.60
   3  -5 -10  773.81   25.70
  -3   5  10  644.69   24.93
   3  -5 -10  791.62   25.29
   1  -5  11   20.71    3.38
  -1   5 -11   23.28    3.23
   1  -5  11   18.61    3.23
  -4  -7 -11  158.32    5.83
  -4  -7 -11  157.02    6.65
  -4  -7 -11  157.82    6.88
  -4  -7 -11  153.95    7.31
   1   1  16   62.26    4.54
   1   1  16   72.81    4.14
  -1  -1 -16   79.72    4.35
  -1  -1 -16   69.72    4.97
   1   1  16   75.18    4.57
  -1  -1 -16   72.69    4.53
   7   0   7    2.39    3.66
   7   0   7    5.73    2.63
   7   0   7    5.13    0.96
   7   0   7    8.68    2.79
   7   0   7    9.20    2.89
  -7   0  -7    4.98    1.79
  -7   0  -7    6.37    2.49
   5   8   0   11.54    2.09
   5   8   0   11.13    3.07
   5   8   0   14.17    3.53
  -5  -8   0   12.43    1.79
  -5  -8   0    8.80    3.36
   5   8   0   12.08    3.97
   3   0  15   14.25    3.50
  -3   0 -15   20.85    3.73
   3   0  15   18.33    3.69
   3   0  15   20.94    3.28
  -3   0 -15   16.32    3.20
  -3   0 -15   12.32    3.81
  -3  -4 -15  603.24   21.63
   3   4  15  650.56   22.06
   3   4  15  603.51   22.11
  -3  -4 -15  535.92   21.86
  -3  -4 -15  661.39   21.91
   3   4  15  613.27   21.97
  -4   4  -9  185.53    7.61
   4  -4   9  188.46    6.98
  -4   4  -9  191.13    7.52
   4  -4   9  181.62    7.91
   4  -4   9  174.26    7.42
  -4   4  -9  175.48    6.94
  -5   4  -6  179.47    6.99
  -5   4  -6  216.07    8.00
   5  -4   6  223.45    8.00
  -5   4  -6  231.39    7.94
   5  -4   6  230.57    8.74
  -7  -6  -5   97.25    4.96
   7   6   5   92.96    5.17
   7   6   5  102.98    4.67
  -7  -6  -5   90.81    5.69
   7   6   5  101.69    4.97
  -7  -6  -5   99.85    4.92
   7   6   5   92.64    3.75
   1   2  16   74.29    4.18
  -1  -2 -16   71.65    4.32
  -1  -2 -16   78.39    4.64
  -1  -2 -16   68.31    4.53
   1   2  16   69.80    4.64
   1   2  16   78.71    4.50
   6   7   7  382.54   13.87
  -6  -7  -7  368.96   13.38
  -6  -7  -7  384.96   13.76
   6   7   7  351.52   13.41
  -6  -7  -7  389.21   13.91
  -2   7  -4  104.78    5.05
   2  -7   4  113.58    5.46
   2  -7   4  117.24    5.47
  -2   7  -4  117.14    5.78
  -2   7  -4  103.39    5.47
   2  -7   4  129.75    5.17
   7   3  -5   49.57    3.89
  -7  -3   5   40.72    3.26
  -7  -3   5   38.42    2.17
  -7  -3   5   45.11    3.62
   7   3  -5   49.18    3.53
  -2   3  14   85.17    4.09
  -2   3  14   86.40    4.84
   2  -3 -14   74.25    4.18
   0   3 -14  423.12   15.53
   0  -3  14  427.15   15.65
   0  -3  14  415.79   15.55
   0   3 -14  426.93   15.48
   0  -3  14  423.52   15.34
   0   3 -14  429.25   15.63
   5   8   6    5.31    3.47
  -5  -8  -6    4.64    3.05
  -5  -8  -6    2.82    2.74
  -5  -8  -6    1.39    2.80
   5   8   6    5.22    3.69
   5   8   6    8.25    3.83
  -5  -8  -6    4.19    0.89
   5   8   6    7.31    2.99
  -3  -8   4    9.78    3.45
  -3  -8   4    4.22    2.96
   3   8  -4   10.54    3.42
   3   8  -4    9.06    3.43
   3   8  -4    6.49    3.60
   3   8  -4    4.35    2.77
  -3  -8   4    6.06    3.45
  -3  -8   4    6.95    3.79
  -7  -2  -9  181.03    6.50
[truncated: 1,557,129 more chars]
