# Supplementary material
Source: MDPI journal article supplement (https://www.mdpi.com/2304-6740/6/1/30)
Supplement: s1 [file s1 › Supporting Information TM180210.pdf]

## Supporting Information

### Synthesis and Characterization of N-Heterocyclic-Carbene-Coordinated Silicon Compounds Bearing a Fused-Ring Bulky Eind Group

Naoki Hayakawa <sup>1</sup>, Kazuya Sadamori <sup>1</sup>, Shinsuke Mizutani <sup>1</sup>, Tomohiro Agou <sup>2, 4</sup>,  
Tomohiro Sugahara <sup>2</sup>, Takahiro Sasamori <sup>2, 5</sup>, Norihiro Tokitoh <sup>2</sup>, Daisuke Hashizume <sup>3</sup>,  
and Tsukasa Matsuo <sup>1, \*</sup>

- <sup>1</sup> Department of Applied Chemistry, Faculty of Science and Engineering, Kindai University 3-4-1 Kowakae, Higashi-Osaka, Osaka 577-8502, Japan
- <sup>2</sup> Institute for Chemical Research, Kyoto University, Gokasho, Uji, Kyoto 611-0011, Japan
- <sup>3</sup> RIKEN Center for Emergent Matter Science (CEMS), 2-1 Hirosawa, Wako, Saitama 351-0198, Japan
- <sup>4</sup> Department of Biomolecular Functional Engineering, College of Engineering, Ibaraki University, 4-12-1 Naka-narusawa, Hitachi, Ibaraki 316-8511, Japan
- <sup>5</sup> Graduate School of Natural Sciences, Nagoya City University Yamanohata 1, Mizuho-cho, Mizuho-ku, Nagoya, Aichi 467-8501, Japan

E-mail: t-matsuo@apch.kindai.ac.jp  
(submitted to *Inorganics*)

#### NMR spectra of the new compounds (**4a**, **2a'**, and **3a**) IR spectrum of **4a**

(Eind)<sub>2</sub>SiHBr<sub>2</sub> (**4a**): Figures S1, S2, S3, and S4

(Im-<sup>*i*</sup>Pr<sub>2</sub>Me<sub>2</sub>)→SiBr(Eind) (**2a'**): Figures S5, S6, and S7

[(Im-Me<sub>4</sub>)<sub>2</sub>→Si(Eind)]<sup>+</sup>[Br]<sup>-</sup> (**3a**): Figures S8, S9, and S10

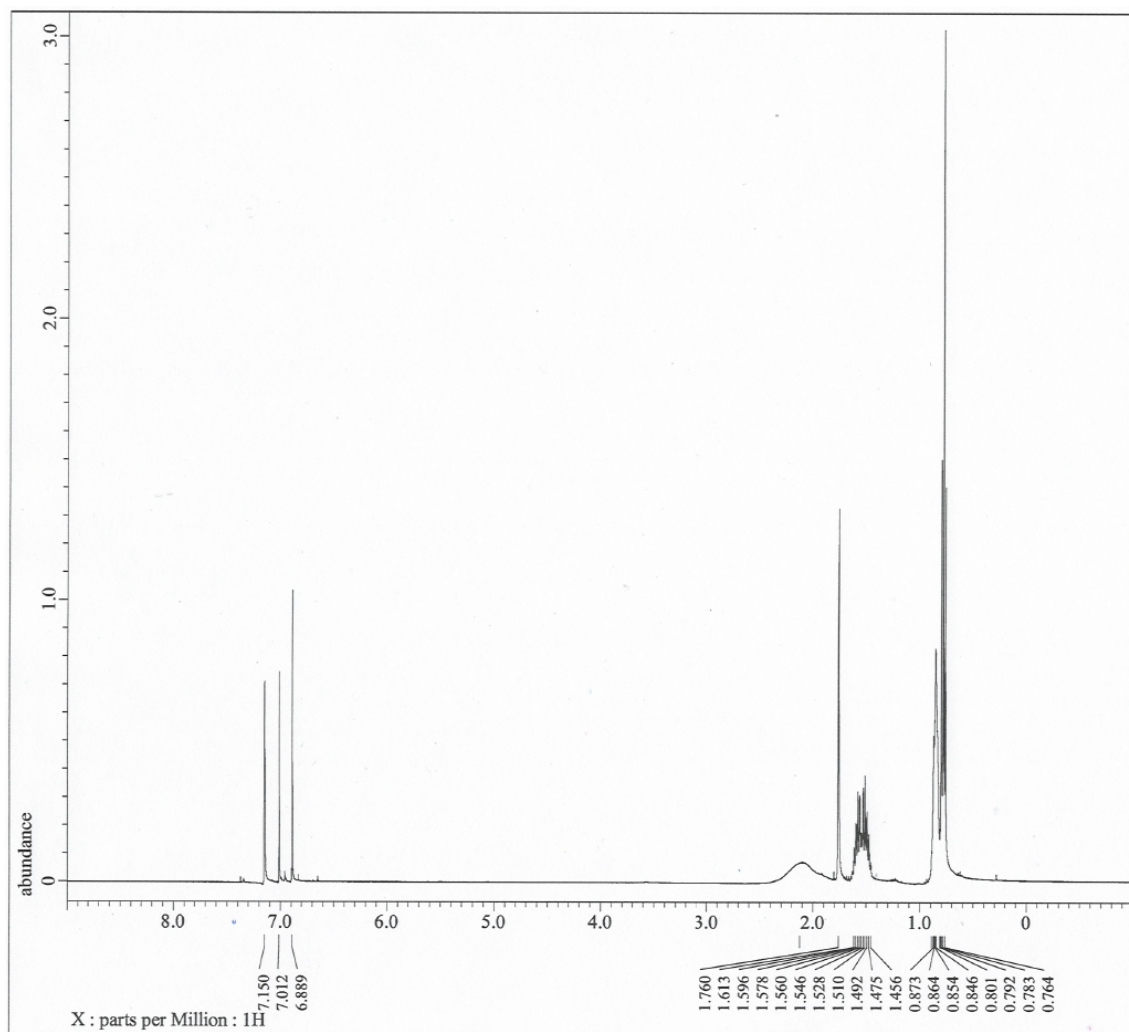

**Figure S1.**  $^1\text{H}$  NMR spectrum of **4a** in  $\text{C}_6\text{D}_6$  at 30 °C.

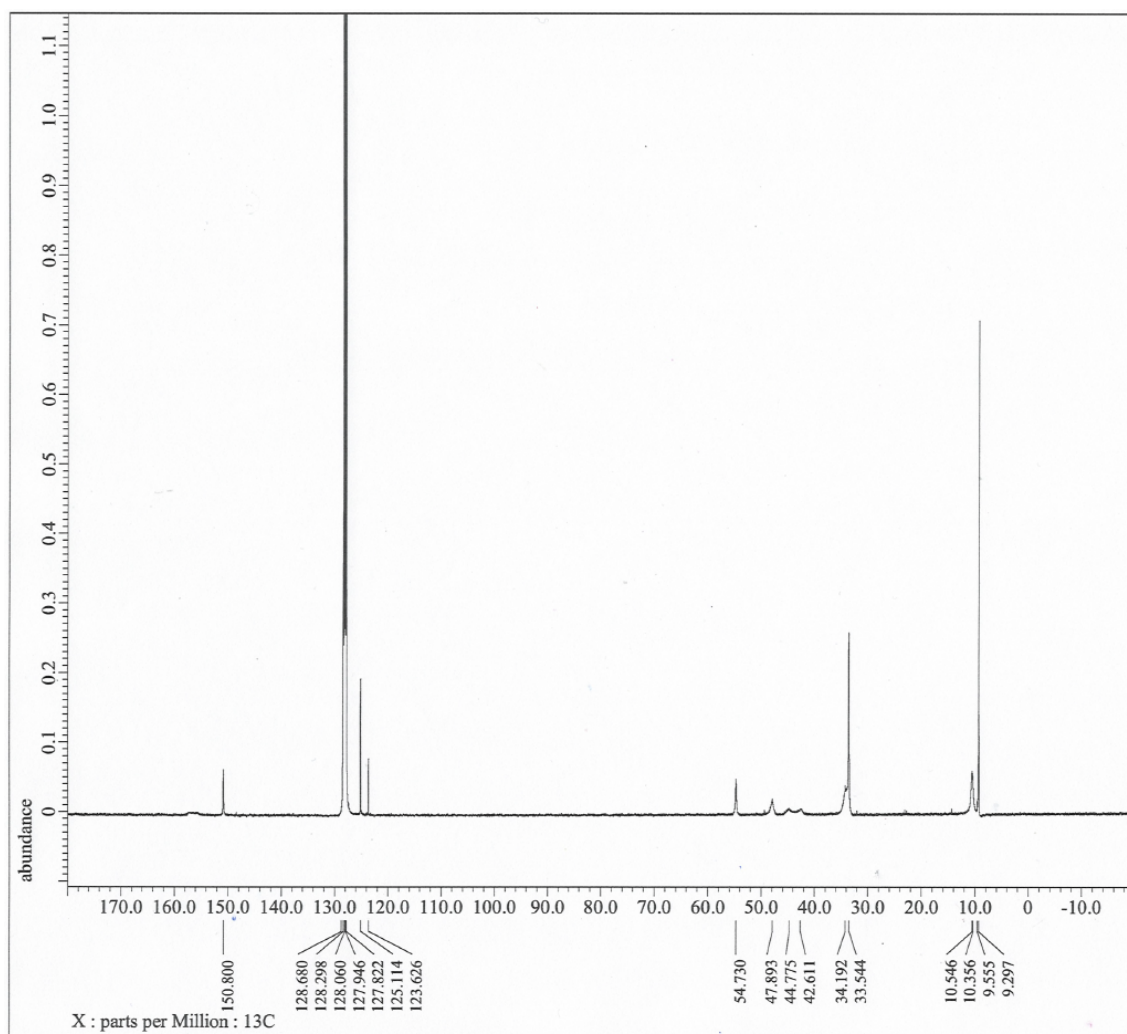

**Figure S2.**  $^{13}\text{C}$  NMR spectrum of **4a** in  $\text{C}_6\text{D}_6$  at  $25^\circ\text{C}$ .

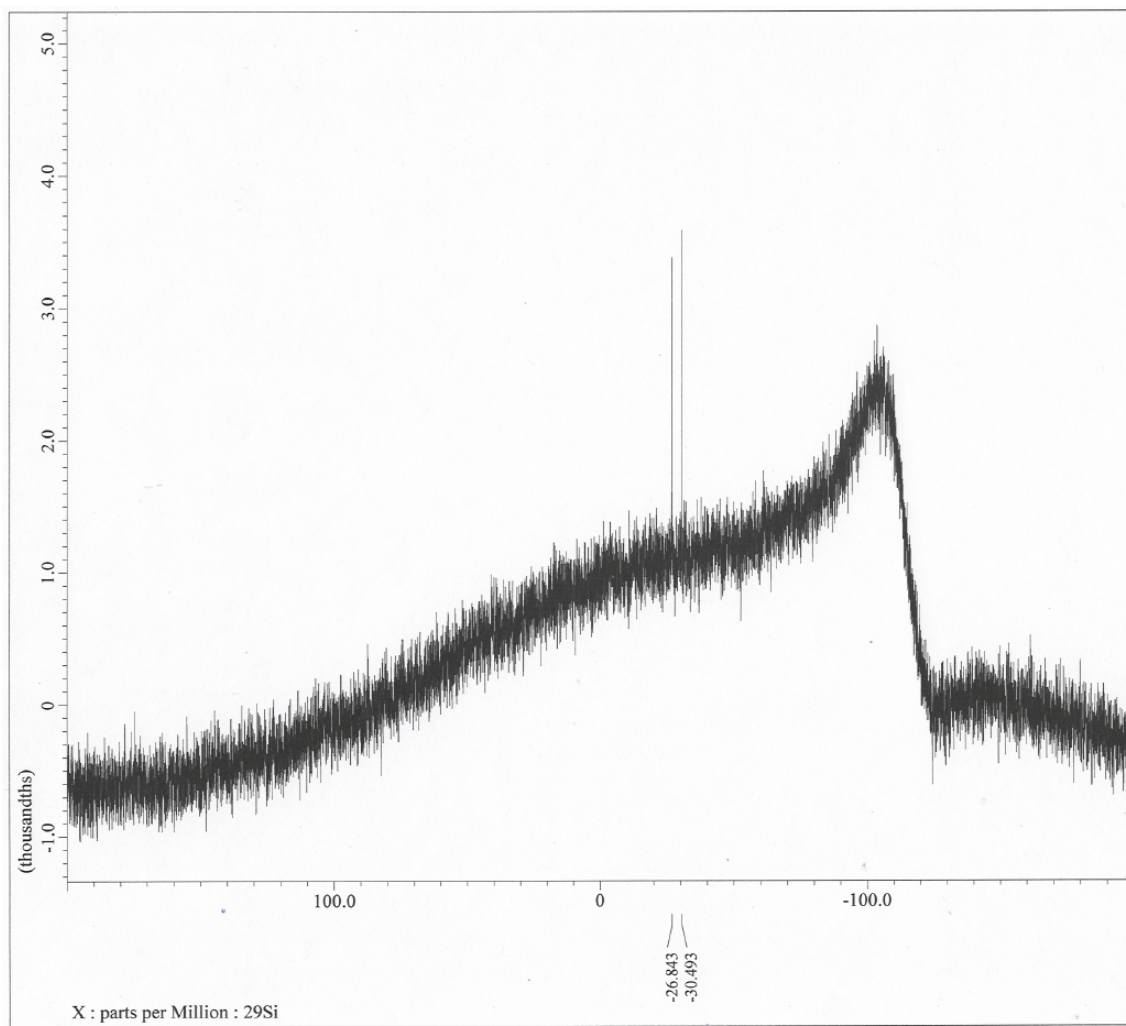

**Figure S3.**  $^{29}\text{Si}$  NMR spectrum of **4a** in  $\text{C}_6\text{D}_6$  at 30 °C.

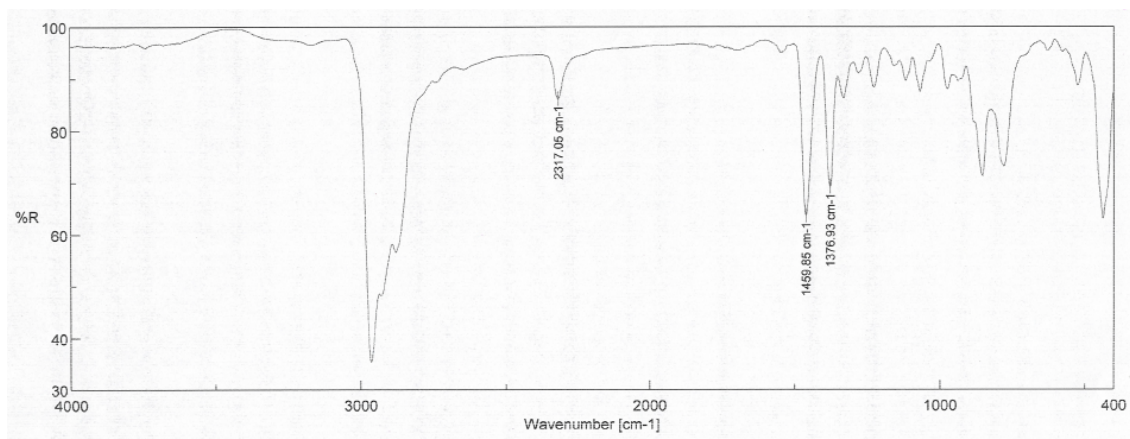

**Figure S4.** IR spectrum of **4a** (KBr).

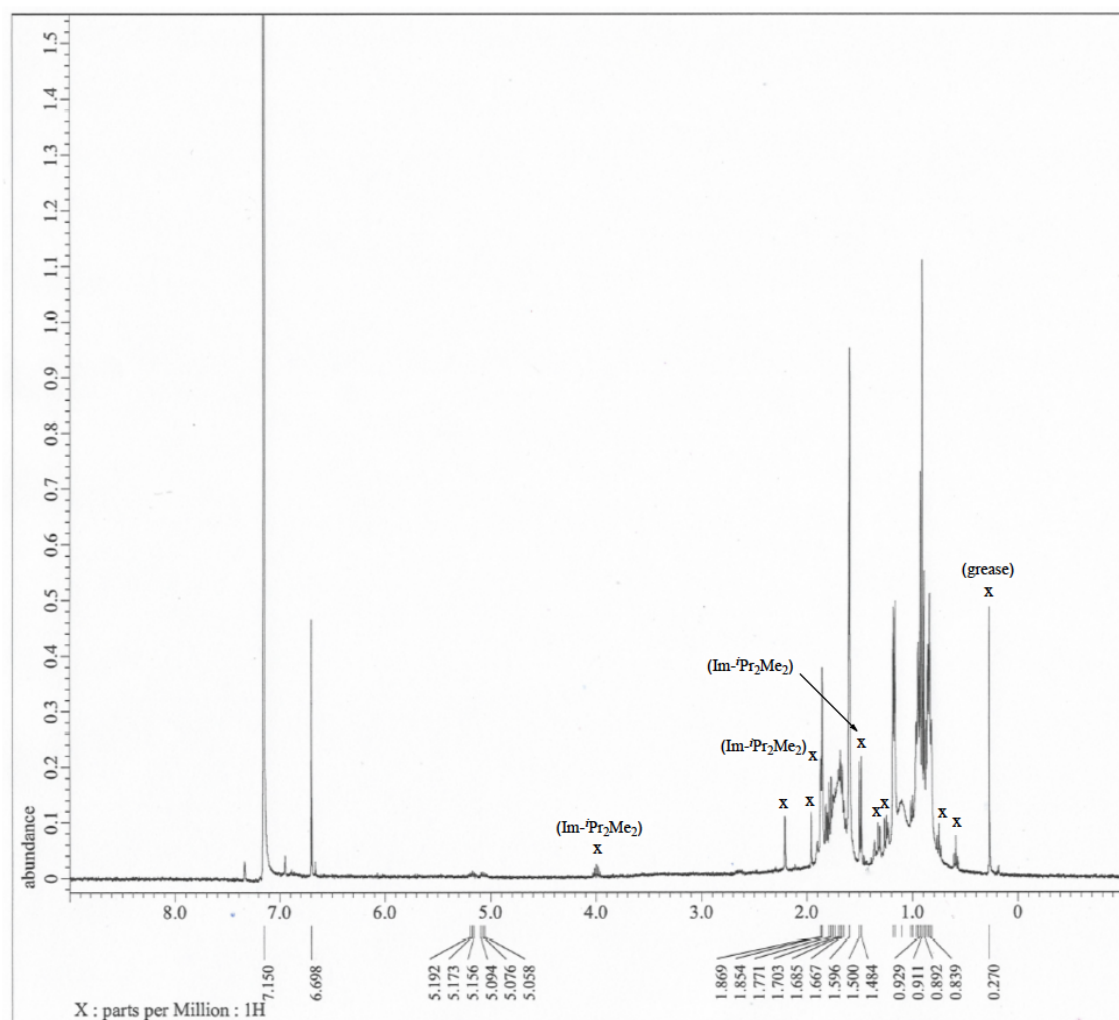

**Figure S5.**  $^1\text{H}$  NMR spectrum of **2a'** in  $\text{C}_6\text{D}_6$  at 60 °C.

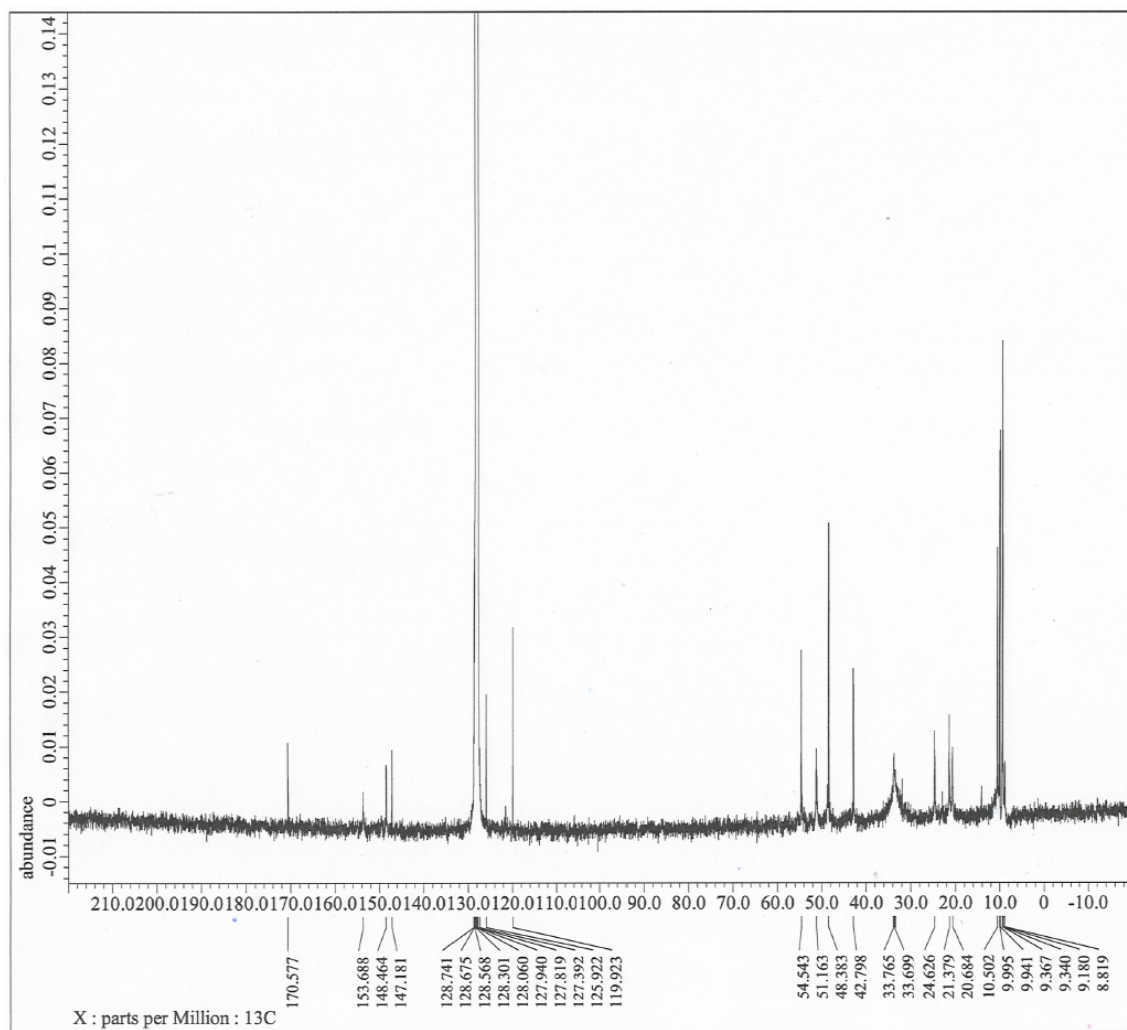

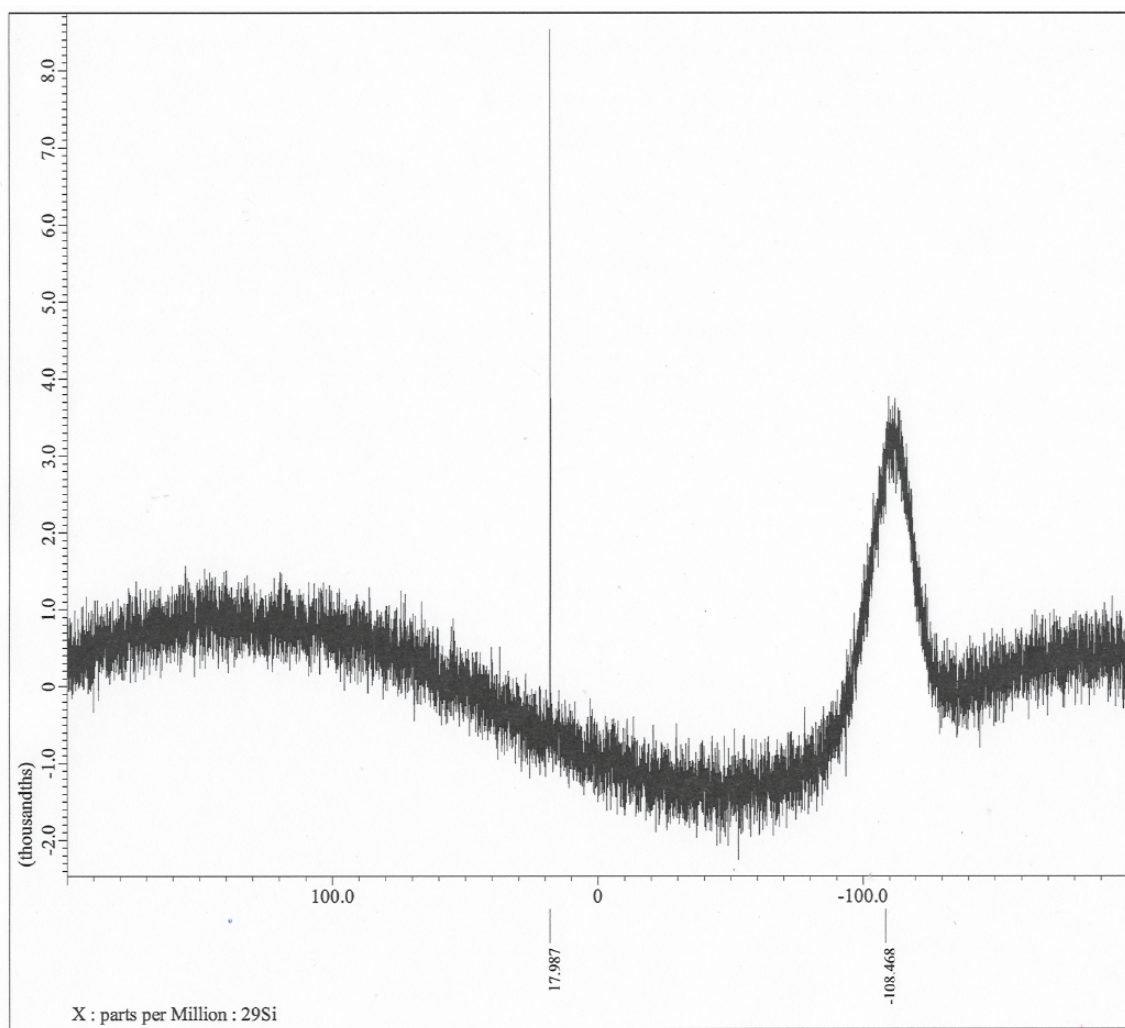

**Figure S7.**  $^{29}\text{Si}$  NMR spectrum of **2a'** in  $\text{C}_6\text{D}_6$  at 25 °C.



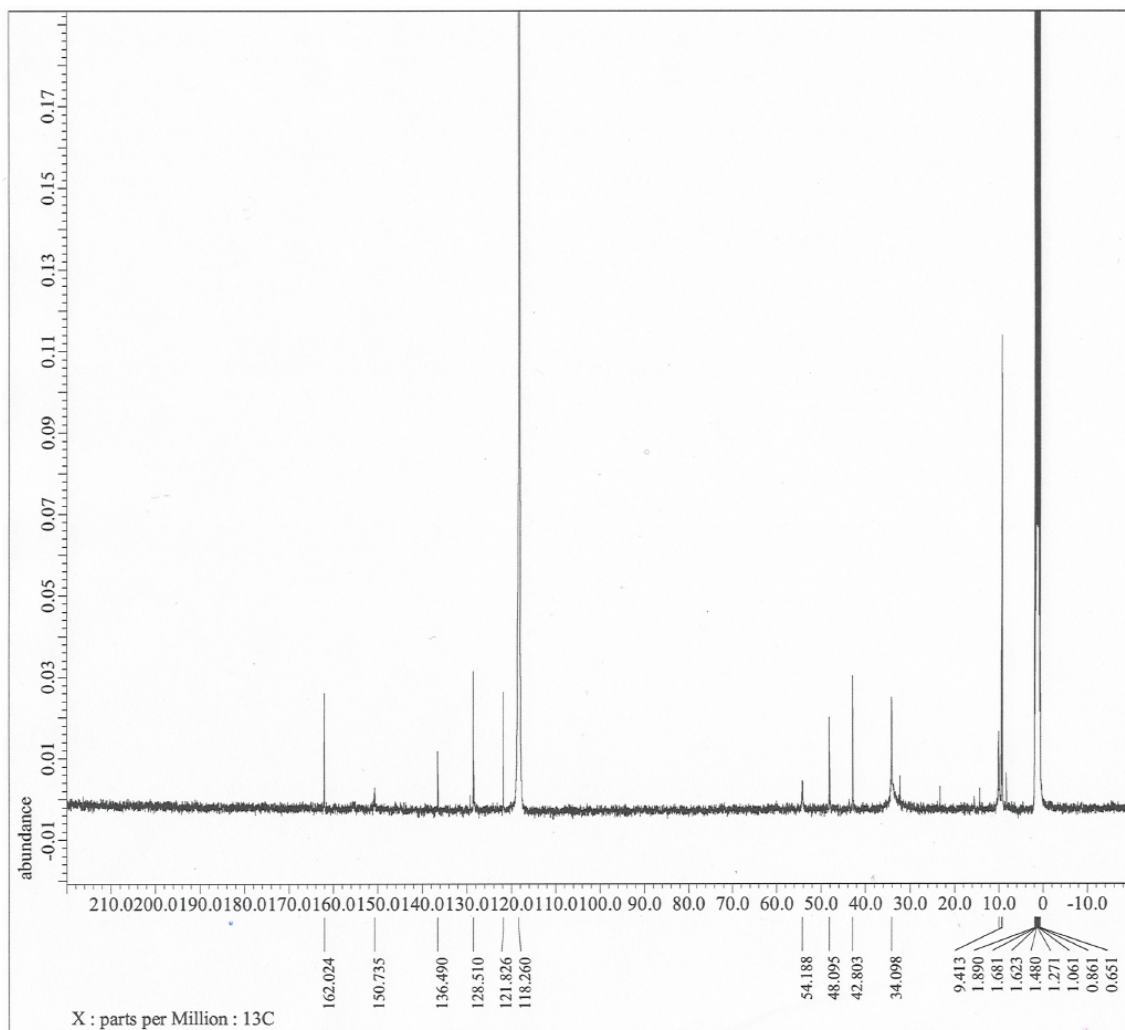

**Figure S9.** <sup>13</sup>C NMR spectrum of **3a** in CD<sub>3</sub>CN at 19 °C.

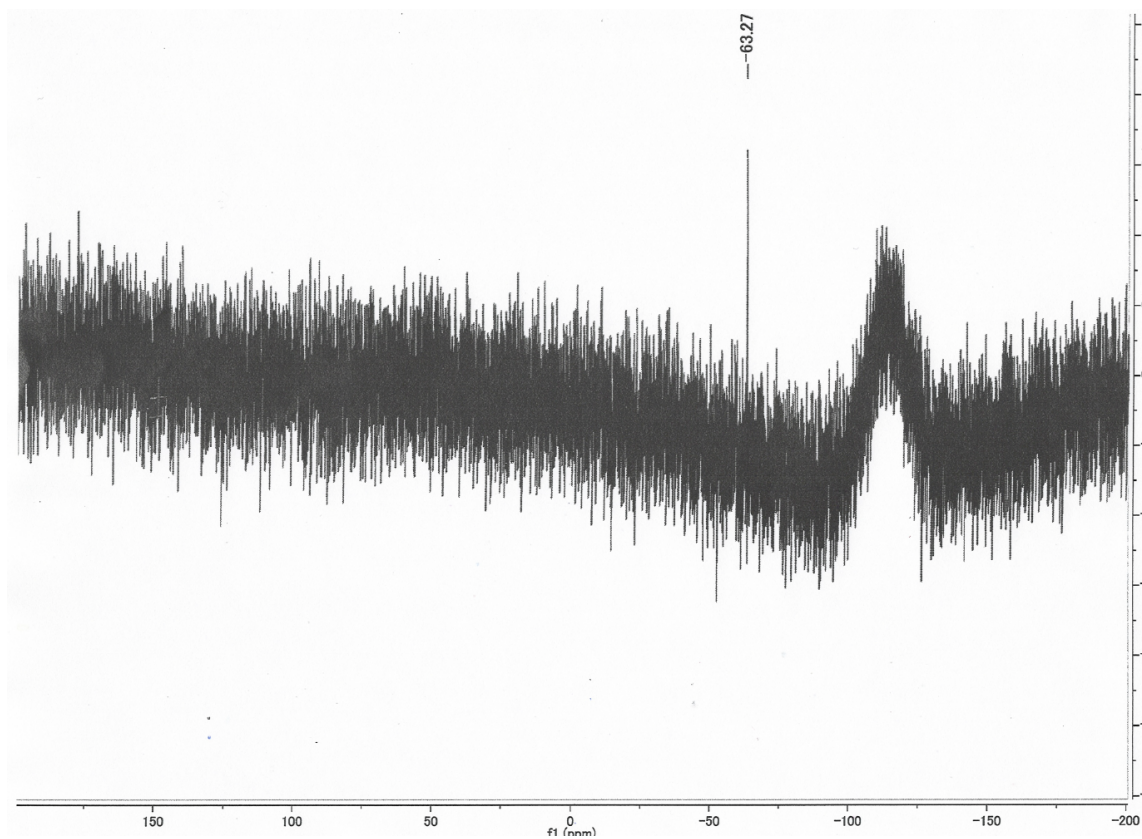

**Figure S10.**  $^{29}\text{Si}$  NMR spectrum of **3a** in  $\text{CD}_3\text{CN}$  at 25 °C.
